# Supplementary material for: SIMMER employs similarity algorithms to accurately identify human gut microbiome species and enzymes capable of known chemical transformations
Source: eLife. 2023 Jun 12;12:e82401. doi: 10.7554/eLife.82401 (PMC10289814; doi:10.7554/eLife.82401)
Supplement: Figure 2—source data 1. [file elife-82401-fig2-data1.xlsx]

## Sheet: Figure 2A and 2-fig supp 4
euclidean distance	comparison	EC number	method				p_values:	EC number	SIMMER	one_substrate_one_product	substrate		k_statistics:	EC number	SIMMER	one_substrate_one_product	substrate
6.79472	without	1	one_substrate_one_product					1	1.19814e-173	1.06509e-80	8.37767e-170			1	0.418174	0.287071	0.413653
7.43816	without	1	one_substrate_one_product					2	3.94223e-14	X	X			2	0.131148	X	X
6.86022	without	1	one_substrate_one_product					3	0	5.13864e-40	5.76997e-21			3	0.834586	0.310419	0.22449
7.49316	without	1	one_substrate_one_product					4	3.75476e-147	X	X			4	0.604167	X	X
6.02358	without	1	one_substrate_one_product					5	7.04064e-158	1.00963e-38	8.23818e-07			5	0.792079	0.411881	0.170297
6.24343	without	1	one_substrate_one_product					6	5.46063e-51	X	X			6	0.959596	X	X
10.3395	without	1	one_substrate_one_product					X indicates incorrect direction of difference (inter EC reactions group closer than intra)						X indicates incorrect direction of difference (inter EC reactions group closer than intra)
10.3395	without	1	one_substrate_one_product
6.00326	without	1	one_substrate_one_product
7.95044	without	1	one_substrate_one_product
6.86552	without	1	one_substrate_one_product
6.78239	without	1	one_substrate_one_product
7.43544	without	1	one_substrate_one_product
6.45857	without	1	one_substrate_one_product
7.30501	without	1	one_substrate_one_product
7.24246	without	1	one_substrate_one_product
7.14571	without	1	one_substrate_one_product
7.14571	without	1	one_substrate_one_product
6.70361	without	1	one_substrate_one_product
6.82974	without	1	one_substrate_one_product
6.85951	without	1	one_substrate_one_product
7.27436	without	1	one_substrate_one_product
6.61426	without	1	one_substrate_one_product
6.98196	without	1	one_substrate_one_product
8.64344	without	1	one_substrate_one_product
8.64344	without	1	one_substrate_one_product
6.7603	without	1	one_substrate_one_product
6.7603	without	1	one_substrate_one_product
7.19536	without	1	one_substrate_one_product
7.30983	without	1	one_substrate_one_product
8.46942	without	1	one_substrate_one_product
7.44553	without	1	one_substrate_one_product
7.58037	without	1	one_substrate_one_product
7.58037	without	1	one_substrate_one_product
7.2802	without	1	one_substrate_one_product
9.0778	without	1	one_substrate_one_product
6.42355	without	1	one_substrate_one_product
8.31951	without	1	one_substrate_one_product
7.28725	without	1	one_substrate_one_product
6.28387	without	1	one_substrate_one_product
9.7041	without	1	one_substrate_one_product
7.11602	without	1	one_substrate_one_product
7.872	without	1	one_substrate_one_product
7.00789	without	1	one_substrate_one_product
7.69593	without	1	one_substrate_one_product
6.91608	without	1	one_substrate_one_product
8.11045	without	1	one_substrate_one_product
6.56802	without	1	one_substrate_one_product
8.96195	without	1	one_substrate_one_product
17.1634	without	1	one_substrate_one_product
17.1634	without	1	one_substrate_one_product
7.00237	without	1	one_substrate_one_product
7.2489	without	1	one_substrate_one_product
8.11215	without	1	one_substrate_one_product
7.13724	without	1	one_substrate_one_product
7.00349	without	1	one_substrate_one_product
6.52958	without	1	one_substrate_one_product
7.43753	without	1	one_substrate_one_product
6.56517	without	1	one_substrate_one_product
6.56517	without	1	one_substrate_one_product
6.30678	without	1	one_substrate_one_product
7.08139	without	1	one_substrate_one_product
6.94712	without	1	one_substrate_one_product
5.89654	without	1	one_substrate_one_product
6.82508	without	1	one_substrate_one_product
7.49316	without	1	one_substrate_one_product
6.91131	without	1	one_substrate_one_product
8.51576	without	1	one_substrate_one_product
7.44632	without	1	one_substrate_one_product
10.3378	without	1	one_substrate_one_product
7.74007	without	1	one_substrate_one_product
7.74007	without	1	one_substrate_one_product
6.30009	without	1	one_substrate_one_product
6.29713	without	1	one_substrate_one_product
8.96195	without	1	one_substrate_one_product
15.9372	without	1	one_substrate_one_product
6.76578	without	1	one_substrate_one_product
8.31563	without	1	one_substrate_one_product
8.31563	without	1	one_substrate_one_product
7.71673	without	1	one_substrate_one_product
9.26008	without	1	one_substrate_one_product
6.63208	without	1	one_substrate_one_product
6.44521	without	1	one_substrate_one_product
8.9676	without	1	one_substrate_one_product
8.29082	without	1	one_substrate_one_product
8.29082	without	1	one_substrate_one_product
6.08507	without	1	one_substrate_one_product
7.92855	without	1	one_substrate_one_product
8.92092	without	1	one_substrate_one_product
7.12561	without	1	one_substrate_one_product
7.12561	without	1	one_substrate_one_product
6.25528	without	1	one_substrate_one_product
6.6784	without	1	one_substrate_one_product
9.39445	without	1	one_substrate_one_product
9.39445	without	1	one_substrate_one_product
8.23115	without	1	one_substrate_one_product
8.23115	without	1	one_substrate_one_product
7.35613	without	1	one_substrate_one_product
7.66714	without	1	one_substrate_one_product
6.62736	without	1	one_substrate_one_product
8.10427	without	1	one_substrate_one_product
6.84972	without	1	one_substrate_one_product
6.62401	without	1	one_substrate_one_product
6.43377	without	1	one_substrate_one_product
7.38194	without	1	one_substrate_one_product
8.46942	without	1	one_substrate_one_product
9.7041	without	1	one_substrate_one_product
9.7041	without	1	one_substrate_one_product
8.64523	without	1	one_substrate_one_product
7.91866	without	1	one_substrate_one_product
10.0339	without	1	one_substrate_one_product
7.1349	without	1	one_substrate_one_product
7.1349	without	1	one_substrate_one_product
6.3316	without	1	one_substrate_one_product
7.06296	without	1	one_substrate_one_product
8.22342	without	1	one_substrate_one_product
16.3302	without	1	one_substrate_one_product
7.51663	without	1	one_substrate_one_product
7.91899	without	1	one_substrate_one_product
6.20847	without	1	one_substrate_one_product
7.30501	without	1	one_substrate_one_product
6.72992	without	1	one_substrate_one_product
7.89282	without	1	one_substrate_one_product
7.17243	without	1	one_substrate_one_product
7.17243	without	1	one_substrate_one_product
8.62661	without	1	one_substrate_one_product
8.2307	without	1	one_substrate_one_product
10.0339	without	1	one_substrate_one_product
10.0339	without	1	one_substrate_one_product
8.28667	without	1	one_substrate_one_product
9.19192	without	1	one_substrate_one_product
6.90058	without	1	one_substrate_one_product
16.5991	without	1	one_substrate_one_product
7.91076	without	1	one_substrate_one_product
6.61426	without	1	one_substrate_one_product
8.75821	without	1	one_substrate_one_product
5.89055	without	1	one_substrate_one_product
7.98396	without	1	one_substrate_one_product
7.73799	without	1	one_substrate_one_product
7.56068	without	1	one_substrate_one_product
7.56068	without	1	one_substrate_one_product
7.9581	without	1	one_substrate_one_product
7.69593	without	1	one_substrate_one_product
6.274	without	1	one_substrate_one_product
7.75814	without	1	one_substrate_one_product
6.38305	without	1	one_substrate_one_product
6.50803	without	1	one_substrate_one_product
7.17534	without	1	one_substrate_one_product
8.37709	without	1	one_substrate_one_product
8.37709	without	1	one_substrate_one_product
5.91257	without	1	one_substrate_one_product
6.1201	without	1	one_substrate_one_product
6.04101	without	1	one_substrate_one_product
6.89703	without	1	one_substrate_one_product
7.10416	without	1	one_substrate_one_product
6.47626	without	1	one_substrate_one_product
7.69593	without	1	one_substrate_one_product
9.19192	without	1	one_substrate_one_product
10.3085	without	1	one_substrate_one_product
10.3085	without	1	one_substrate_one_product
7.40896	without	1	one_substrate_one_product
7.26579	without	1	one_substrate_one_product
7.1943	without	1	one_substrate_one_product
7.54057	without	1	one_substrate_one_product
6.2797	without	1	one_substrate_one_product
9.7041	without	1	one_substrate_one_product
7.39942	without	1	one_substrate_one_product
7.69593	without	1	one_substrate_one_product
6.83782	without	1	one_substrate_one_product
6.04846	without	1	one_substrate_one_product
7.69593	without	1	one_substrate_one_product
8.26464	without	1	one_substrate_one_product
8.75821	without	1	one_substrate_one_product
8.75821	without	1	one_substrate_one_product
7.69593	without	1	one_substrate_one_product
7.04164	without	1	one_substrate_one_product
9.08728	without	1	one_substrate_one_product
7.73524	without	1	one_substrate_one_product
8.34962	without	1	one_substrate_one_product
17.4847	without	1	one_substrate_one_product
17.4847	without	1	one_substrate_one_product
7.8245	without	1	one_substrate_one_product
7.09423	without	1	one_substrate_one_product
6.16613	without	1	one_substrate_one_product
9.57475	without	1	one_substrate_one_product
12.5471	without	1	one_substrate_one_product
12.5471	without	1	one_substrate_one_product
17.0673	without	1	one_substrate_one_product
8.08988	without	1	one_substrate_one_product
17.2778	without	1	one_substrate_one_product
17.2778	without	1	one_substrate_one_product
7.89123	without	1	one_substrate_one_product
8.05981	without	1	one_substrate_one_product
7.62778	without	1	one_substrate_one_product
6.42187	without	1	one_substrate_one_product
9.19192	without	1	one_substrate_one_product
10.3038	without	1	one_substrate_one_product
8.64004	without	1	one_substrate_one_product
7.69593	without	1	one_substrate_one_product
7.84666	without	1	one_substrate_one_product
17.4819	without	1	one_substrate_one_product
17.4819	without	1	one_substrate_one_product
9.7041	without	1	one_substrate_one_product
9.27116	without	1	one_substrate_one_product
9.27116	without	1	one_substrate_one_product
7.43328	without	1	one_substrate_one_product
7.11239	without	1	one_substrate_one_product
8.30684	without	1	one_substrate_one_product
7.08139	without	1	one_substrate_one_product
7.0966	without	1	one_substrate_one_product
7.69593	without	1	one_substrate_one_product
8.52477	without	1	one_substrate_one_product
7.69593	without	1	one_substrate_one_product
6.87731	without	1	one_substrate_one_product
7.69593	without	1	one_substrate_one_product
9.09272	without	1	one_substrate_one_product
7.42543	without	1	one_substrate_one_product
6.55279	without	1	one_substrate_one_product
7.69593	without	1	one_substrate_one_product
10.0339	without	1	one_substrate_one_product
10.0339	without	1	one_substrate_one_product
12.5027	without	1	one_substrate_one_product
7.0218	without	1	one_substrate_one_product
7.89219	without	1	one_substrate_one_product
7.89219	without	1	one_substrate_one_product
7.27469	without	1	one_substrate_one_product
8.217	without	1	one_substrate_one_product
7.69593	without	1	one_substrate_one_product
7.37632	without	1	one_substrate_one_product
7.37632	without	1	one_substrate_one_product
6.636	without	1	one_substrate_one_product
6.95032	without	1	one_substrate_one_product
6.3388	without	1	one_substrate_one_product
7.16959	without	1	one_substrate_one_product
7.16959	without	1	one_substrate_one_product
10.7431	without	1	one_substrate_one_product
10.7431	without	1	one_substrate_one_product
7.73524	without	1	one_substrate_one_product
9.57475	without	1	one_substrate_one_product
6.5261	without	1	one_substrate_one_product
7.42626	without	1	one_substrate_one_product
9.0778	without	1	one_substrate_one_product
8.46942	without	1	one_substrate_one_product
7.73104	without	1	one_substrate_one_product
8.19436	without	1	one_substrate_one_product
6.04723	without	1	one_substrate_one_product
6.54726	without	1	one_substrate_one_product
8.85314	without	1	one_substrate_one_product
8.85314	without	1	one_substrate_one_product
7.7679	without	1	one_substrate_one_product
9.31147	without	1	one_substrate_one_product
6.82479	without	1	one_substrate_one_product
5.89354	without	1	one_substrate_one_product
6.64358	without	1	one_substrate_one_product
9.84362	without	1	one_substrate_one_product
9.84362	without	1	one_substrate_one_product
9.77958	without	1	one_substrate_one_product
6.76917	without	1	one_substrate_one_product
6.65666	without	1	one_substrate_one_product
8.33074	without	1	one_substrate_one_product
7.75322	without	1	one_substrate_one_product
7.51643	without	1	one_substrate_one_product
7.69593	without	1	one_substrate_one_product
10.2888	without	1	one_substrate_one_product
9.7041	without	1	one_substrate_one_product
7.69593	without	1	one_substrate_one_product
6.70348	without	1	one_substrate_one_product
6.97351	without	1	one_substrate_one_product
8.2844	without	1	one_substrate_one_product
7.80016	without	1	one_substrate_one_product
11.9218	without	1	one_substrate_one_product
6.54203	without	1	one_substrate_one_product
7.02931	without	1	one_substrate_one_product
6.272	without	1	one_substrate_one_product
6.272	without	1	one_substrate_one_product
10.3378	without	1	one_substrate_one_product
8.10411	without	1	one_substrate_one_product
6.11832	without	1	one_substrate_one_product
6.48008	without	1	one_substrate_one_product
6.1526	without	1	one_substrate_one_product
7.5896	without	1	one_substrate_one_product
7.94039	without	1	one_substrate_one_product
9.0778	without	1	one_substrate_one_product
8.39614	without	1	one_substrate_one_product
7.69593	without	1	one_substrate_one_product
7.85412	without	1	one_substrate_one_product
9.0778	without	1	one_substrate_one_product
6.84637	without	1	one_substrate_one_product
12.4988	without	1	one_substrate_one_product
12.4988	without	1	one_substrate_one_product
6.82229	without	1	one_substrate_one_product
8.39614	without	1	one_substrate_one_product
7.58831	without	1	one_substrate_one_product
7.69593	without	1	one_substrate_one_product
7.69593	without	1	one_substrate_one_product
6.03894	without	1	one_substrate_one_product
6.37293	without	1	one_substrate_one_product
8.29658	without	1	one_substrate_one_product
7.69593	without	1	one_substrate_one_product
17.6635	without	1	one_substrate_one_product
17.6635	without	1	one_substrate_one_product
8.29658	without	1	one_substrate_one_product
7.12368	without	1	one_substrate_one_product
10.3038	without	1	one_substrate_one_product
10.3038	without	1	one_substrate_one_product
7.69593	without	1	one_substrate_one_product
10.4465	without	1	one_substrate_one_product
7.77924	without	1	one_substrate_one_product
7.44556	without	1	one_substrate_one_product
17.9197	without	1	one_substrate_one_product
7.60462	without	1	one_substrate_one_product
6.84499	without	1	one_substrate_one_product
8.00602	without	1	one_substrate_one_product
8.00602	without	1	one_substrate_one_product
6.77346	without	1	one_substrate_one_product
6.10711	without	1	one_substrate_one_product
6.14363	without	1	one_substrate_one_product
6.63871	without	1	one_substrate_one_product
7.48404	without	1	one_substrate_one_product
6.70762	without	1	one_substrate_one_product
7.87837	without	1	one_substrate_one_product
7.94904	without	1	one_substrate_one_product
6.46779	without	1	one_substrate_one_product
6.52679	without	1	one_substrate_one_product
17.2165	without	1	one_substrate_one_product
17.2165	without	1	one_substrate_one_product
6.27706	without	1	one_substrate_one_product
6.79455	without	1	one_substrate_one_product
6.37293	without	1	one_substrate_one_product
8.83297	without	1	one_substrate_one_product
7.59427	without	1	one_substrate_one_product
7.59427	without	1	one_substrate_one_product
6.69763	without	1	one_substrate_one_product
8.35932	without	1	one_substrate_one_product
7.89219	without	1	one_substrate_one_product
7.89219	without	1	one_substrate_one_product
7.276	without	1	one_substrate_one_product
7.27782	without	1	one_substrate_one_product
7.10674	without	1	one_substrate_one_product
7.10674	without	1	one_substrate_one_product
7.69593	without	1	one_substrate_one_product
7.26246	without	1	one_substrate_one_product
7.26246	without	1	one_substrate_one_product
7.10436	without	1	one_substrate_one_product
6.65863	without	1	one_substrate_one_product
6.65863	without	1	one_substrate_one_product
6.475	without	1	one_substrate_one_product
16.3137	without	1	one_substrate_one_product
16.3137	without	1	one_substrate_one_product
10.3024	without	1	one_substrate_one_product
6.55149	without	1	one_substrate_one_product
6.33305	without	1	one_substrate_one_product
7.51494	without	1	one_substrate_one_product
6.24774	without	1	one_substrate_one_product
8.89048	without	1	one_substrate_one_product
7.69593	without	1	one_substrate_one_product
7.03364	without	1	one_substrate_one_product
8.55143	without	1	one_substrate_one_product
8.31951	without	1	one_substrate_one_product
8.31951	without	1	one_substrate_one_product
6.67344	without	1	one_substrate_one_product
9.19192	without	1	one_substrate_one_product
8.05332	without	1	one_substrate_one_product
6.69946	without	1	one_substrate_one_product
6.32126	without	1	one_substrate_one_product
9.62798	without	1	one_substrate_one_product
7.13587	without	1	one_substrate_one_product
7.34161	without	1	one_substrate_one_product
8.11243	without	1	one_substrate_one_product
7.62901	without	1	one_substrate_one_product
7.96531	without	1	one_substrate_one_product
10.7754	without	1	one_substrate_one_product
7.83515	without	1	one_substrate_one_product
7.27108	without	1	one_substrate_one_product
7.31069	without	1	one_substrate_one_product
7.05999	without	1	one_substrate_one_product
7.24985	without	1	one_substrate_one_product
5.83693	without	1	one_substrate_one_product
17.282	without	1	one_substrate_one_product
7.69593	without	1	one_substrate_one_product
7.69593	without	1	one_substrate_one_product
7.07801	without	1	one_substrate_one_product
9.19192	without	1	one_substrate_one_product
7.12236	without	1	one_substrate_one_product
7.74131	without	1	one_substrate_one_product
7.83184	without	1	one_substrate_one_product
7.83184	without	1	one_substrate_one_product
7.69593	without	1	one_substrate_one_product
12.7959	without	1	one_substrate_one_product
12.7959	without	1	one_substrate_one_product
7.67896	without	1	one_substrate_one_product
9.06831	without	1	one_substrate_one_product
8.55119	without	1	one_substrate_one_product
8.20794	without	1	one_substrate_one_product
8.46269	without	1	one_substrate_one_product
7.48386	without	1	one_substrate_one_product
9.7041	without	1	one_substrate_one_product
10.7309	without	1	one_substrate_one_product
10.7309	without	1	one_substrate_one_product
9.28073	without	1	one_substrate_one_product
9.19192	without	1	one_substrate_one_product
9.19192	without	1	one_substrate_one_product
6.78173	without	1	one_substrate_one_product
6.27084	without	1	one_substrate_one_product
7.74131	without	1	one_substrate_one_product
6.52311	without	1	one_substrate_one_product
10.7431	without	1	one_substrate_one_product
9.16276	without	1	one_substrate_one_product
7.79274	without	1	one_substrate_one_product
10.3085	without	1	one_substrate_one_product
7.276	without	1	one_substrate_one_product
9.70761	without	1	one_substrate_one_product
9.70761	without	1	one_substrate_one_product
7.15518	without	1	one_substrate_one_product
6.05254	without	1	one_substrate_one_product
6.64888	without	1	one_substrate_one_product
6.64888	without	1	one_substrate_one_product
6.69613	without	1	one_substrate_one_product
7.96961	without	1	one_substrate_one_product
7.55427	without	1	one_substrate_one_product
12.7959	without	1	one_substrate_one_product
12.7959	without	1	one_substrate_one_product
6.31248	without	1	one_substrate_one_product
7.73524	without	1	one_substrate_one_product
6.50436	without	1	one_substrate_one_product
7.23783	without	1	one_substrate_one_product
7.07034	without	1	one_substrate_one_product
7.94434	without	1	one_substrate_one_product
10.3038	without	1	one_substrate_one_product
10.3038	without	1	one_substrate_one_product
7.06244	without	1	one_substrate_one_product
9.35174	without	1	one_substrate_one_product
9.35174	without	1	one_substrate_one_product
6.83681	without	1	one_substrate_one_product
8.93068	without	1	one_substrate_one_product
6.98455	without	1	one_substrate_one_product
6.98455	without	1	one_substrate_one_product
7.17029	without	1	one_substrate_one_product
6.70361	without	1	one_substrate_one_product
9.7041	without	1	one_substrate_one_product
9.41921	without	1	one_substrate_one_product
8.2785	without	1	one_substrate_one_product
6.75512	without	1	one_substrate_one_product
9.30941	without	1	one_substrate_one_product
7.22756	without	1	one_substrate_one_product
10.0339	without	1	one_substrate_one_product
10.0339	without	1	one_substrate_one_product
10.7431	without	1	one_substrate_one_product
10.7431	without	1	one_substrate_one_product
16.3758	without	1	one_substrate_one_product
16.3758	without	1	one_substrate_one_product
8.64004	without	1	one_substrate_one_product
7.37578	without	1	one_substrate_one_product
7.69593	without	1	one_substrate_one_product
6.14485	without	1	one_substrate_one_product
9.07514	without	1	one_substrate_one_product
7.69593	without	1	one_substrate_one_product
6.91554	without	1	one_substrate_one_product
6.19593	without	1	one_substrate_one_product
8.31951	without	1	one_substrate_one_product
8.31951	without	1	one_substrate_one_product
6.6893	without	1	one_substrate_one_product
6.71299	without	1	one_substrate_one_product
6.67287	without	1	one_substrate_one_product
6.62595	without	1	one_substrate_one_product
7.69593	without	1	one_substrate_one_product
7.42335	without	1	one_substrate_one_product
11.504	without	1	one_substrate_one_product
9.57475	without	1	one_substrate_one_product
8.75708	without	1	one_substrate_one_product
7.57587	without	1	one_substrate_one_product
8.60556	without	1	one_substrate_one_product
7.45129	without	1	one_substrate_one_product
7.26246	without	1	one_substrate_one_product
7.26246	without	1	one_substrate_one_product
7.69593	without	1	one_substrate_one_product
6.78239	without	1	one_substrate_one_product
6.78239	without	1	one_substrate_one_product
6.78239	without	1	one_substrate_one_product
10.3038	without	1	one_substrate_one_product
5.93109	without	1	one_substrate_one_product
7.17326	without	1	one_substrate_one_product
6.3861	without	1	one_substrate_one_product
6.81002	without	1	one_substrate_one_product
7.15226	without	1	one_substrate_one_product
7.30501	without	1	one_substrate_one_product
7.69593	without	1	one_substrate_one_product
7.48748	without	1	one_substrate_one_product
7.28758	without	1	one_substrate_one_product
7.27866	without	1	one_substrate_one_product
11.504	without	1	one_substrate_one_product
7.14571	without	1	one_substrate_one_product
6.17838	without	1	one_substrate_one_product
6.73539	without	1	one_substrate_one_product
6.78239	without	1	one_substrate_one_product
6.35221	without	1	one_substrate_one_product
7.90346	without	1	one_substrate_one_product
6.66654	without	1	one_substrate_one_product
7.40654	without	1	one_substrate_one_product
7.69593	without	1	one_substrate_one_product
8.15382	without	1	one_substrate_one_product
17.8721	without	1	one_substrate_one_product
17.8721	without	1	one_substrate_one_product
8.39614	without	1	one_substrate_one_product
5.88854	without	1	one_substrate_one_product
7.5016	without	1	one_substrate_one_product
8.12861	without	1	one_substrate_one_product
6.89395	without	1	one_substrate_one_product
7.93598	without	1	one_substrate_one_product
7.84566	without	1	one_substrate_one_product
7.84566	without	1	one_substrate_one_product
10.7309	without	1	one_substrate_one_product
8.88099	without	1	one_substrate_one_product
7.17218	without	1	one_substrate_one_product
6.26355	without	1	one_substrate_one_product
8.46942	without	1	one_substrate_one_product
5.84261	without	1	one_substrate_one_product
6.4467	without	1	one_substrate_one_product
6.73539	without	1	one_substrate_one_product
7.69593	without	1	one_substrate_one_product
6.61433	without	1	one_substrate_one_product
6.34444	without	1	one_substrate_one_product
7.07856	without	1	one_substrate_one_product
7.72597	without	1	one_substrate_one_product
7.82838	without	1	one_substrate_one_product
11.9218	without	1	one_substrate_one_product
7.44819	without	1	one_substrate_one_product
6.68267	without	1	one_substrate_one_product
6.19221	without	1	one_substrate_one_product
8.05227	without	1	one_substrate_one_product
8.05227	without	1	one_substrate_one_product
7.69593	without	1	one_substrate_one_product
6.28024	without	1	one_substrate_one_product
6.82639	without	1	one_substrate_one_product
16.3302	without	1	one_substrate_one_product
7.73358	without	1	one_substrate_one_product
7.73358	without	1	one_substrate_one_product
9.1482	without	1	one_substrate_one_product
16.4455	without	1	one_substrate_one_product
16.4455	without	1	one_substrate_one_product
13.4237	without	1	one_substrate_one_product
9.19192	without	1	one_substrate_one_product
7.61548	without	1	one_substrate_one_product
8.9838	without	1	one_substrate_one_product
8.27356	without	1	one_substrate_one_product
8.44684	without	1	one_substrate_one_product
7.69593	without	1	one_substrate_one_product
9.0778	without	1	one_substrate_one_product
6.52401	without	1	one_substrate_one_product
7.2121	without	1	one_substrate_one_product
7.2121	without	1	one_substrate_one_product
7.57981	without	1	one_substrate_one_product
10.3038	without	1	one_substrate_one_product
6.80781	without	1	one_substrate_one_product
6.64411	without	1	one_substrate_one_product
8.26453	without	1	one_substrate_one_product
12.7959	without	1	one_substrate_one_product
12.7959	without	1	one_substrate_one_product
8.47799	without	1	one_substrate_one_product
7.01515	without	1	one_substrate_one_product
9.07897	without	1	one_substrate_one_product
7.6014	without	1	one_substrate_one_product
8.85314	without	1	one_substrate_one_product
8.85314	without	1	one_substrate_one_product
7.52169	without	1	one_substrate_one_product
7.52169	without	1	one_substrate_one_product
6.96215	without	1	one_substrate_one_product
12.7959	without	1	one_substrate_one_product
12.7959	without	1	one_substrate_one_product
7.69593	without	1	one_substrate_one_product
7.60877	without	1	one_substrate_one_product
7.69593	without	1	one_substrate_one_product
9.0778	without	1	one_substrate_one_product
7.24859	without	1	one_substrate_one_product
10.3038	without	1	one_substrate_one_product
7.99818	without	1	one_substrate_one_product
10.0246	without	1	one_substrate_one_product
10.0246	without	1	one_substrate_one_product
7.60899	without	1	one_substrate_one_product
6.56993	without	1	one_substrate_one_product
17.9082	without	1	one_substrate_one_product
10.3038	without	1	one_substrate_one_product
10.3038	without	1	one_substrate_one_product
16.0351	without	1	one_substrate_one_product
6.93051	without	1	one_substrate_one_product
6.69981	without	1	one_substrate_one_product
7.0779	without	1	one_substrate_one_product
10.3038	without	1	one_substrate_one_product
9.7041	without	1	one_substrate_one_product
7.42496	without	1	one_substrate_one_product
7.42496	without	1	one_substrate_one_product
12.7959	without	1	one_substrate_one_product
12.7959	without	1	one_substrate_one_product
6.33222	without	1	one_substrate_one_product
7.61814	without	1	one_substrate_one_product
11.504	without	1	one_substrate_one_product
9.10035	without	1	one_substrate_one_product
10.7431	without	1	one_substrate_one_product
10.7431	without	1	one_substrate_one_product
6.43253	without	1	one_substrate_one_product
7.18891	without	1	one_substrate_one_product
8.78436	without	1	one_substrate_one_product
6.70348	without	1	one_substrate_one_product
8.26453	without	1	one_substrate_one_product
8.27953	without	1	one_substrate_one_product
8.24502	without	1	one_substrate_one_product
7.07653	without	1	one_substrate_one_product
6.00114	without	1	one_substrate_one_product
8.67822	without	1	one_substrate_one_product
10.3085	without	1	one_substrate_one_product
10.3085	without	1	one_substrate_one_product
7.81773	without	1	one_substrate_one_product
7.69593	without	1	one_substrate_one_product
7.69593	without	1	one_substrate_one_product
7.69593	without	1	one_substrate_one_product
17.8616	without	1	one_substrate_one_product
8.39614	without	1	one_substrate_one_product
8.96195	without	1	one_substrate_one_product
7.82996	without	1	one_substrate_one_product
10.3684	without	1	one_substrate_one_product
8.81213	without	1	one_substrate_one_product
6.93041	without	1	one_substrate_one_product
6.93041	without	1	one_substrate_one_product
8.28695	without	1	one_substrate_one_product
6.42696	without	1	one_substrate_one_product
7.69593	without	1	one_substrate_one_product
7.15805	without	1	one_substrate_one_product
12.4988	without	1	one_substrate_one_product
12.4988	without	1	one_substrate_one_product
9.19192	without	1	one_substrate_one_product
9.1096	without	1	one_substrate_one_product
9.1096	without	1	one_substrate_one_product
7.04961	without	1	one_substrate_one_product
9.0778	without	1	one_substrate_one_product
7.69593	without	1	one_substrate_one_product
6.47838	without	1	one_substrate_one_product
8.36414	without	1	one_substrate_one_product
6.27157	without	1	one_substrate_one_product
6.12683	without	1	one_substrate_one_product
6.34103	without	1	one_substrate_one_product
7.30501	without	1	one_substrate_one_product
8.27244	without	1	one_substrate_one_product
7.80455	without	1	one_substrate_one_product
6.76623	without	1	one_substrate_one_product
6.90492	without	1	one_substrate_one_product
6.58453	without	1	one_substrate_one_product
8.04377	without	1	one_substrate_one_product
12.4988	without	1	one_substrate_one_product
11.9218	without	1	one_substrate_one_product
7.54876	without	1	one_substrate_one_product
7.447	without	1	one_substrate_one_product
8.19906	without	1	one_substrate_one_product
7.21488	without	1	one_substrate_one_product
6.89137	without	1	one_substrate_one_product
7.69593	without	1	one_substrate_one_product
8.19121	without	1	one_substrate_one_product
8.44109	without	1	one_substrate_one_product
8.44109	without	1	one_substrate_one_product
8.96195	without	1	one_substrate_one_product
6.72498	without	1	one_substrate_one_product
6.14062	without	1	one_substrate_one_product
6.59074	without	1	one_substrate_one_product
7.69593	without	1	one_substrate_one_product
6.02831	without	1	one_substrate_one_product
6.90058	without	1	one_substrate_one_product
6.21912	without	1	one_substrate_one_product
7.5016	without	1	one_substrate_one_product
8.05227	without	1	one_substrate_one_product
6.79395	without	1	one_substrate_one_product
9.19192	without	1	one_substrate_one_product
7.30753	without	1	one_substrate_one_product
8.2307	without	1	one_substrate_one_product
10.3378	without	1	one_substrate_one_product
7.60122	without	1	one_substrate_one_product
7.58188	without	1	one_substrate_one_product
8.56739	without	1	one_substrate_one_product
7.82996	without	1	one_substrate_one_product
6.33151	without	1	one_substrate_one_product
9.09272	without	1	one_substrate_one_product
9.09272	without	1	one_substrate_one_product
9.07897	without	1	one_substrate_one_product
7.57711	without	1	one_substrate_one_product
6.8036	without	1	one_substrate_one_product
15.0234	without	1	one_substrate_one_product
7.75048	without	1	one_substrate_one_product
8.42468	without	1	one_substrate_one_product
6.34061	without	1	one_substrate_one_product
6.20848	without	1	one_substrate_one_product
9.7364	without	1	one_substrate_one_product
7.77305	without	1	one_substrate_one_product
7.64701	without	1	one_substrate_one_product
6.44864	without	1	one_substrate_one_product
6.18833	without	1	one_substrate_one_product
7.91311	without	1	one_substrate_one_product
5.97215	without	1	one_substrate_one_product
7.73318	without	1	one_substrate_one_product
6.36089	without	1	one_substrate_one_product
7.2238	without	1	one_substrate_one_product
7.46086	without	1	one_substrate_one_product
6.86938	without	1	one_substrate_one_product
6.6769	without	1	one_substrate_one_product
6.6769	without	1	one_substrate_one_product
7.04648	without	1	one_substrate_one_product
7.05494	without	1	one_substrate_one_product
9.19192	without	1	one_substrate_one_product
6.89156	without	1	one_substrate_one_product
6.89156	without	1	one_substrate_one_product
8.39487	without	1	one_substrate_one_product
6.35107	without	1	one_substrate_one_product
9.79988	without	1	one_substrate_one_product
9.79988	without	1	one_substrate_one_product
6.63616	without	1	one_substrate_one_product
7.69408	without	1	one_substrate_one_product
10.3038	without	1	one_substrate_one_product
10.3038	without	1	one_substrate_one_product
8.67822	without	1	one_substrate_one_product
7.73358	without	1	one_substrate_one_product
7.73358	without	1	one_substrate_one_product
8.01855	without	1	one_substrate_one_product
6.7591	without	1	one_substrate_one_product
9.47336	without	1	one_substrate_one_product
16.8983	without	1	one_substrate_one_product
16.8983	without	1	one_substrate_one_product
7.68303	without	1	one_substrate_one_product
7.68303	without	1	one_substrate_one_product
7.23458	without	1	one_substrate_one_product
7.69593	without	1	one_substrate_one_product
7.98525	without	1	one_substrate_one_product
16.3302	without	1	one_substrate_one_product
17.9765	without	1	one_substrate_one_product
17.9765	without	1	one_substrate_one_product
7.99536	without	1	one_substrate_one_product
7.32422	without	1	one_substrate_one_product
7.59679	without	1	one_substrate_one_product
9.28073	without	1	one_substrate_one_product
7.86972	without	1	one_substrate_one_product
7.20007	without	1	one_substrate_one_product
9.35174	without	1	one_substrate_one_product
9.35174	without	1	one_substrate_one_product
6.56802	without	1	one_substrate_one_product
7.69593	without	1	one_substrate_one_product
12.7959	without	1	one_substrate_one_product
12.7959	without	1	one_substrate_one_product
7.01515	without	1	one_substrate_one_product
6.351	without	1	one_substrate_one_product
7.81453	without	1	one_substrate_one_product
9.07897	without	1	one_substrate_one_product
6.34355	without	1	one_substrate_one_product
8.71107	without	1	one_substrate_one_product
8.31248	without	1	one_substrate_one_product
7.46489	without	1	one_substrate_one_product
7.44548	without	1	one_substrate_one_product
7.01976	without	1	one_substrate_one_product
7.01976	without	1	one_substrate_one_product
6.58722	without	1	one_substrate_one_product
9.7364	without	1	one_substrate_one_product
9.7364	without	1	one_substrate_one_product
7.28302	without	1	one_substrate_one_product
6.37816	without	1	one_substrate_one_product
11.504	without	1	one_substrate_one_product
11.504	without	1	one_substrate_one_product
7.20077	without	1	one_substrate_one_product
6.30804	without	1	one_substrate_one_product
5.94155	without	1	one_substrate_one_product
7.69593	without	1	one_substrate_one_product
9.19192	without	1	one_substrate_one_product
6.49695	without	1	one_substrate_one_product
7.09425	without	1	one_substrate_one_product
7.03214	without	1	one_substrate_one_product
7.69593	without	1	one_substrate_one_product
7.69593	without	1	one_substrate_one_product
7.93127	without	1	one_substrate_one_product
7.20646	without	1	one_substrate_one_product
7.88176	without	1	one_substrate_one_product
6.48543	without	1	one_substrate_one_product
6.65046	without	1	one_substrate_one_product
6.65046	without	1	one_substrate_one_product
6.40437	without	1	one_substrate_one_product
17.8616	without	1	one_substrate_one_product
6.41121	without	1	one_substrate_one_product
9.28073	without	1	one_substrate_one_product
7.69593	without	1	one_substrate_one_product
8.96375	without	1	one_substrate_one_product
7.58387	without	1	one_substrate_one_product
8.41007	without	1	one_substrate_one_product
6.65956	without	1	one_substrate_one_product
7.57711	without	1	one_substrate_one_product
12.7959	without	1	one_substrate_one_product
12.7959	without	1	one_substrate_one_product
6.71885	without	1	one_substrate_one_product
6.56492	without	1	one_substrate_one_product
7.07217	without	1	one_substrate_one_product
6.77386	without	1	one_substrate_one_product
7.48295	without	1	one_substrate_one_product
12.7959	without	1	one_substrate_one_product
7.60877	without	1	one_substrate_one_product
7.79274	without	1	one_substrate_one_product
10.7309	without	1	one_substrate_one_product
10.7309	without	1	one_substrate_one_product
6.77871	without	1	one_substrate_one_product
8.75821	without	1	one_substrate_one_product
8.75821	without	1	one_substrate_one_product
7.69593	without	1	one_substrate_one_product
7.61709	without	1	one_substrate_one_product
6.35873	without	1	one_substrate_one_product
6.35873	without	1	one_substrate_one_product
5.8591	without	1	one_substrate_one_product
10.3085	without	1	one_substrate_one_product
6.36104	without	1	one_substrate_one_product
10.3038	without	1	one_substrate_one_product
7.69593	without	1	one_substrate_one_product
8.94607	without	1	one_substrate_one_product
7.69593	without	1	one_substrate_one_product
8.06907	without	1	one_substrate_one_product
7.41396	without	1	one_substrate_one_product
9.31147	without	1	one_substrate_one_product
9.31147	without	1	one_substrate_one_product
7.69593	without	1	one_substrate_one_product
9.7041	without	1	one_substrate_one_product
7.69593	without	1	one_substrate_one_product
7.98066	without	1	one_substrate_one_product
6.69946	without	1	one_substrate_one_product
10.3378	without	1	one_substrate_one_product
6.04353	without	1	one_substrate_one_product
7.44673	without	1	one_substrate_one_product
6.13213	without	1	one_substrate_one_product
7.75566	without	1	one_substrate_one_product
6.8731	without	1	one_substrate_one_product
8.75551	without	1	one_substrate_one_product
9.68502	without	1	one_substrate_one_product
7.20928	without	1	one_substrate_one_product
6.92343	without	1	one_substrate_one_product
8.3013	without	1	one_substrate_one_product
7.69593	without	1	one_substrate_one_product
6.79507	without	1	one_substrate_one_product
6.4829	without	1	one_substrate_one_product
6.80169	without	1	one_substrate_one_product
6.32834	without	1	one_substrate_one_product
8.78026	without	1	one_substrate_one_product
7.69593	without	1	one_substrate_one_product
7.69593	without	1	one_substrate_one_product
6.14273	without	1	one_substrate_one_product
6.71433	without	1	one_substrate_one_product
6.71433	without	1	one_substrate_one_product
7.69593	without	1	one_substrate_one_product
7.84265	without	1	one_substrate_one_product
6.87992	without	1	one_substrate_one_product
10.4465	without	1	one_substrate_one_product
10.4465	without	1	one_substrate_one_product
6.5261	without	1	one_substrate_one_product
6.65497	without	1	one_substrate_one_product
7.60899	without	1	one_substrate_one_product
8.01855	without	1	one_substrate_one_product
9.31147	without	1	one_substrate_one_product
6.03175	without	1	one_substrate_one_product
5.99938	without	1	one_substrate_one_product
12.4988	without	1	one_substrate_one_product
12.4988	without	1	one_substrate_one_product
7.58387	without	1	one_substrate_one_product
7.8098	without	1	one_substrate_one_product
6.50817	without	1	one_substrate_one_product
6.80299	without	1	one_substrate_one_product
6.61348	without	1	one_substrate_one_product
10.7431	without	1	one_substrate_one_product
10.7431	without	1	one_substrate_one_product
6.94712	without	1	one_substrate_one_product
9.7041	without	1	one_substrate_one_product
6.6591	without	1	one_substrate_one_product
9.33472	without	1	one_substrate_one_product
9.33472	without	1	one_substrate_one_product
8.86661	without	1	one_substrate_one_product
8.86661	without	1	one_substrate_one_product
7.80016	without	1	one_substrate_one_product
6.89252	without	1	one_substrate_one_product
6.15181	without	1	one_substrate_one_product
6.39647	without	1	one_substrate_one_product
8.57482	without	1	one_substrate_one_product
6.72808	without	1	one_substrate_one_product
7.51494	without	1	one_substrate_one_product
6.47651	without	1	one_substrate_one_product
7.47552	without	1	one_substrate_one_product
7.55427	without	1	one_substrate_one_product
7.54727	without	1	one_substrate_one_product
6.27875	without	1	one_substrate_one_product
8.25977	without	1	one_substrate_one_product
7.88356	without	1	one_substrate_one_product
6.28796	without	1	one_substrate_one_product
11.504	without	1	one_substrate_one_product
6.0224	without	1	one_substrate_one_product
8.05174	without	1	one_substrate_one_product
8.80786	without	1	one_substrate_one_product
9.24492	without	1	one_substrate_one_product
6.94712	without	1	one_substrate_one_product
6.09942	without	1	one_substrate_one_product
8.3174	without	1	one_substrate_one_product
8.04814	without	1	one_substrate_one_product
7.55946	without	1	one_substrate_one_product
7.09818	without	1	one_substrate_one_product
7.26782	without	1	one_substrate_one_product
7.30501	without	1	one_substrate_one_product
9.07897	without	1	one_substrate_one_product
8.52776	without	1	one_substrate_one_product
15.6449	without	1	one_substrate_one_product
7.27217	without	1	one_substrate_one_product
8.42468	without	1	one_substrate_one_product
8.42468	without	1	one_substrate_one_product
7.44912	without	1	one_substrate_one_product
10.3085	without	1	one_substrate_one_product
7.1182	without	1	one_substrate_one_product
6.33776	without	1	one_substrate_one_product
7.25121	without	1	one_substrate_one_product
7.57711	without	1	one_substrate_one_product
7.69593	without	1	one_substrate_one_product
10.3085	without	1	one_substrate_one_product
7.59833	without	1	one_substrate_one_product
7.69593	without	1	one_substrate_one_product
8.46715	without	1	one_substrate_one_product
8.46715	without	1	one_substrate_one_product
8.7727	without	1	one_substrate_one_product
10.3038	without	1	one_substrate_one_product
10.3038	without	1	one_substrate_one_product
7.69593	without	1	one_substrate_one_product
7.90623	without	1	one_substrate_one_product
7.69593	without	1	one_substrate_one_product
7.69593	without	1	one_substrate_one_product
7.69593	without	1	one_substrate_one_product
8.79031	without	1	one_substrate_one_product
8.14044	without	1	one_substrate_one_product
8.14044	without	1	one_substrate_one_product
8.96195	without	1	one_substrate_one_product
7.69593	without	1	one_substrate_one_product
7.2492	without	1	one_substrate_one_product
8.51576	without	1	one_substrate_one_product
7.90134	without	1	one_substrate_one_product
7.47081	without	1	one_substrate_one_product
6.76349	without	1	one_substrate_one_product
6.76349	without	1	one_substrate_one_product
6.33514	without	1	one_substrate_one_product
7.27502	without	1	one_substrate_one_product
12.0079	without	1	one_substrate_one_product
7.28178	without	1	one_substrate_one_product
7.83788	without	1	one_substrate_one_product
7.16336	without	1	one_substrate_one_product
7.16336	without	1	one_substrate_one_product
7.69593	without	1	one_substrate_one_product
6.12336	without	1	one_substrate_one_product
6.7076	without	1	one_substrate_one_product
6.7076	without	1	one_substrate_one_product
7.69593	without	1	one_substrate_one_product
7.69593	without	1	one_substrate_one_product
8.17119	without	1	one_substrate_one_product
7.27436	without	1	one_substrate_one_product
9.79988	without	1	one_substrate_one_product
6.26212	without	1	one_substrate_one_product
7.82996	without	1	one_substrate_one_product
8.96195	without	1	one_substrate_one_product
7.69593	without	1	one_substrate_one_product
6.2624	without	1	one_substrate_one_product
7.22718	without	1	one_substrate_one_product
9.51515	without	1	one_substrate_one_product
9.51515	without	1	one_substrate_one_product
7.60122	without	1	one_substrate_one_product
7.16583	without	1	one_substrate_one_product
6.63745	without	1	one_substrate_one_product
7.69593	without	1	one_substrate_one_product
7.69593	without	1	one_substrate_one_product
6.98655	without	1	one_substrate_one_product
7.87303	without	1	one_substrate_one_product
9.09272	without	1	one_substrate_one_product
7.75948	without	1	one_substrate_one_product
6.75882	without	1	one_substrate_one_product
10.7309	without	1	one_substrate_one_product
10.7309	without	1	one_substrate_one_product
6.97903	without	1	one_substrate_one_product
7.57183	without	1	one_substrate_one_product
6.92994	without	1	one_substrate_one_product
6.45857	without	1	one_substrate_one_product
10.7431	without	1	one_substrate_one_product
10.7431	without	1	one_substrate_one_product
7.24824	without	1	one_substrate_one_product
6.65179	without	1	one_substrate_one_product
7.02698	without	1	one_substrate_one_product
7.13441	without	1	one_substrate_one_product
7.36487	without	1	one_substrate_one_product
9.19192	without	1	one_substrate_one_product
7.99383	without	1	one_substrate_one_product
9.68502	without	1	one_substrate_one_product
7.6849	without	1	one_substrate_one_product
7.69593	without	1	one_substrate_one_product
6.86076	without	1	one_substrate_one_product
9.7041	without	1	one_substrate_one_product
7.13544	without	1	one_substrate_one_product
7.69593	without	1	one_substrate_one_product
7.06757	without	1	one_substrate_one_product
11.504	without	1	one_substrate_one_product
8.96195	without	1	one_substrate_one_product
7.33259	without	1	one_substrate_one_product
8.70051	without	1	one_substrate_one_product
8.70051	without	1	one_substrate_one_product
6.37598	without	1	one_substrate_one_product
5.94986	without	1	one_substrate_one_product
6.09398	without	1	one_substrate_one_product
6.42197	without	1	one_substrate_one_product
7.81741	without	1	one_substrate_one_product
7.82996	without	1	one_substrate_one_product
7.82996	without	1	one_substrate_one_product
6.16405	without	1	one_substrate_one_product
11.504	without	1	one_substrate_one_product
9.19192	without	1	one_substrate_one_product
8.75821	without	1	one_substrate_one_product
8.75821	without	1	one_substrate_one_product
7.60574	without	1	one_substrate_one_product
7.7718	without	1	one_substrate_one_product
7.21987	without	1	one_substrate_one_product
7.56122	without	1	one_substrate_one_product
6.22067	without	1	one_substrate_one_product
6.52997	without	1	one_substrate_one_product
9.1096	without	1	one_substrate_one_product
9.1096	without	1	one_substrate_one_product
9.08728	without	1	one_substrate_one_product
6.54262	without	1	one_substrate_one_product
10.3038	without	1	one_substrate_one_product
10.3038	without	1	one_substrate_one_product
6.47626	without	1	one_substrate_one_product
6.37495	without	1	one_substrate_one_product
9.15677	without	1	one_substrate_one_product
9.30941	without	1	one_substrate_one_product
6.90517	without	1	one_substrate_one_product
6.19048	without	1	one_substrate_one_product
7.91325	without	1	one_substrate_one_product
7.64822	without	1	one_substrate_one_product
6.34747	without	1	one_substrate_one_product
8.27146	without	1	one_substrate_one_product
10.3085	without	1	one_substrate_one_product
7.73775	without	1	one_substrate_one_product
8.05838	without	1	one_substrate_one_product
7.83188	without	1	one_substrate_one_product
9.0778	without	1	one_substrate_one_product
8.96195	without	1	one_substrate_one_product
7.63958	without	1	one_substrate_one_product
8.42468	without	1	one_substrate_one_product
8.13128	without	1	one_substrate_one_product
8.13128	without	1	one_substrate_one_product
7.01974	without	1	one_substrate_one_product
17.3964	without	1	one_substrate_one_product
17.3964	without	1	one_substrate_one_product
9.1989	without	1	one_substrate_one_product
9.1989	without	1	one_substrate_one_product
6.85816	without	1	one_substrate_one_product
5.84875	without	1	one_substrate_one_product
8.39614	without	1	one_substrate_one_product
6.56517	without	1	one_substrate_one_product
6.56517	without	1	one_substrate_one_product
7.69593	without	1	one_substrate_one_product
7.5937	without	1	one_substrate_one_product
9.08728	without	1	one_substrate_one_product
7.69593	without	1	one_substrate_one_product
6.22557	without	1	one_substrate_one_product
6.78239	without	1	one_substrate_one_product
7.24907	without	1	one_substrate_one_product
10.3085	without	1	one_substrate_one_product
9.93629	without	1	one_substrate_one_product
9.93629	without	1	one_substrate_one_product
7.81508	without	1	one_substrate_one_product
8.73841	without	1	one_substrate_one_product
8.73841	without	1	one_substrate_one_product
7.05494	without	1	one_substrate_one_product
17.2778	without	1	one_substrate_one_product
17.2778	without	1	one_substrate_one_product
7.14993	without	1	one_substrate_one_product
10.3038	without	1	one_substrate_one_product
7.56794	without	1	one_substrate_one_product
8.20462	without	1	one_substrate_one_product
6.59195	without	1	one_substrate_one_product
7.7181	without	1	one_substrate_one_product
7.62778	without	1	one_substrate_one_product
6.78239	without	1	one_substrate_one_product
6.27818	without	1	one_substrate_one_product
6.59045	without	1	one_substrate_one_product
7.19252	without	1	one_substrate_one_product
9.7041	without	1	one_substrate_one_product
10.0339	without	1	one_substrate_one_product
10.0339	without	1	one_substrate_one_product
6.50436	without	1	one_substrate_one_product
7.01334	without	1	one_substrate_one_product
9.77958	without	1	one_substrate_one_product
9.77958	without	1	one_substrate_one_product
9.11235	without	1	one_substrate_one_product
8.24822	without	1	one_substrate_one_product
7.15483	without	1	one_substrate_one_product
6.86007	without	1	one_substrate_one_product
7.08139	without	1	one_substrate_one_product
7.3621	without	1	one_substrate_one_product
7.3621	without	1	one_substrate_one_product
7.69593	without	1	one_substrate_one_product
7.69593	without	1	one_substrate_one_product
7.12812	without	1	one_substrate_one_product
6.58519	without	1	one_substrate_one_product
10.3378	without	1	one_substrate_one_product
7.80099	without	1	one_substrate_one_product
6.69271	without	1	one_substrate_one_product
7.00784	without	1	one_substrate_one_product
8.6855	without	1	one_substrate_one_product
7.07217	without	1	one_substrate_one_product
7.69593	without	1	one_substrate_one_product
6.77386	without	1	one_substrate_one_product
7.69593	without	1	one_substrate_one_product
7.69593	without	1	one_substrate_one_product
7.19836	without	1	one_substrate_one_product
9.0778	without	1	one_substrate_one_product
8.33343	without	1	one_substrate_one_product
8.33343	without	1	one_substrate_one_product
7.12665	without	1	one_substrate_one_product
10.0233	without	1	one_substrate_one_product
6.97729	without	1	one_substrate_one_product
7.86972	without	1	one_substrate_one_product
7.86972	without	1	one_substrate_one_product
6.29385	without	1	one_substrate_one_product
9.7041	without	1	one_substrate_one_product
12.4041	without	1	one_substrate_one_product
8.93985	without	1	one_substrate_one_product
7.78989	without	1	one_substrate_one_product
7.54734	without	1	one_substrate_one_product
7.69593	without	1	one_substrate_one_product
9.0778	without	1	one_substrate_one_product
7.69593	without	1	one_substrate_one_product
8.6514	without	1	one_substrate_one_product
6.54726	without	1	one_substrate_one_product
8.89712	without	1	one_substrate_one_product
7.69593	without	1	one_substrate_one_product
12.4988	without	1	one_substrate_one_product
12.4988	without	1	one_substrate_one_product
17.8721	without	1	one_substrate_one_product
17.8721	without	1	one_substrate_one_product
7.18528	without	1	one_substrate_one_product
9.77958	without	1	one_substrate_one_product
8.81133	without	1	one_substrate_one_product
7.85244	without	1	one_substrate_one_product
6.19707	without	1	one_substrate_one_product
7.93419	without	1	one_substrate_one_product
7.58387	without	1	one_substrate_one_product
7.56279	without	1	one_substrate_one_product
7.39207	without	1	one_substrate_one_product
6.22557	without	1	one_substrate_one_product
6.14974	without	1	one_substrate_one_product
7.23458	without	1	one_substrate_one_product
7.69593	without	1	one_substrate_one_product
6.31671	without	1	one_substrate_one_product
7.88191	without	1	one_substrate_one_product
7.88191	without	1	one_substrate_one_product
7.69593	without	1	one_substrate_one_product
6.84731	without	1	one_substrate_one_product
6.84731	without	1	one_substrate_one_product
7.57748	without	1	one_substrate_one_product
7.63826	without	1	one_substrate_one_product
6.82665	without	1	one_substrate_one_product
7.55427	without	1	one_substrate_one_product
7.69593	without	1	one_substrate_one_product
7.71809	without	1	one_substrate_one_product
7.20672	without	1	one_substrate_one_product
11.9218	without	1	one_substrate_one_product
7.75363	without	1	one_substrate_one_product
6.02825	without	1	one_substrate_one_product
10.4465	without	1	one_substrate_one_product
6.26797	without	1	one_substrate_one_product
9.68904	without	1	one_substrate_one_product
7.57711	without	1	one_substrate_one_product
6.72332	without	1	one_substrate_one_product
6.8663	without	1	one_substrate_one_product
9.22524	without	1	one_substrate_one_product
7.85412	without	1	one_substrate_one_product
6.92956	without	1	one_substrate_one_product
9.0778	without	1	one_substrate_one_product
8.52776	without	1	one_substrate_one_product
6.2699	without	1	one_substrate_one_product
7.2716	without	1	one_substrate_one_product
8.60319	without	1	one_substrate_one_product
8.60319	without	1	one_substrate_one_product
7.23458	without	1	one_substrate_one_product
7.23458	without	1	one_substrate_one_product
13.4568	without	1	one_substrate_one_product
7.95103	without	1	one_substrate_one_product
6.85951	without	1	one_substrate_one_product
10.3085	without	1	one_substrate_one_product
16.3302	without	1	one_substrate_one_product
9.19192	without	1	one_substrate_one_product
9.19192	without	1	one_substrate_one_product
7.69593	without	1	one_substrate_one_product
7.69593	without	1	one_substrate_one_product
6.70672	without	1	one_substrate_one_product
6.70672	without	1	one_substrate_one_product
9.54663	without	1	one_substrate_one_product
6.33986	without	1	one_substrate_one_product
9.77958	without	1	one_substrate_one_product
8.5896	without	1	one_substrate_one_product
7.25681	without	1	one_substrate_one_product
9.79988	without	1	one_substrate_one_product
6.76349	without	1	one_substrate_one_product
6.76349	without	1	one_substrate_one_product
7.03214	without	1	one_substrate_one_product
7.81445	without	1	one_substrate_one_product
8.10854	without	1	one_substrate_one_product
6.15678	without	1	one_substrate_one_product
7.91794	without	1	one_substrate_one_product
7.53842	without	1	one_substrate_one_product
10.4969	without	1	one_substrate_one_product
10.4969	without	1	one_substrate_one_product
6.4829	without	1	one_substrate_one_product
6.59201	without	1	one_substrate_one_product
7.89219	without	1	one_substrate_one_product
7.89219	without	1	one_substrate_one_product
6.59025	without	1	one_substrate_one_product
17.9197	without	1	one_substrate_one_product
6.46779	without	1	one_substrate_one_product
6.74701	without	1	one_substrate_one_product
7.91847	without	1	one_substrate_one_product
7.69593	without	1	one_substrate_one_product
7.69593	without	1	one_substrate_one_product
6.87664	without	1	one_substrate_one_product
7.29737	without	1	one_substrate_one_product
7.29737	without	1	one_substrate_one_product
6.34765	without	1	one_substrate_one_product
6.5696	without	1	one_substrate_one_product
6.31928	without	1	one_substrate_one_product
6.31928	without	1	one_substrate_one_product
8.92092	without	1	one_substrate_one_product
6.20048	without	1	one_substrate_one_product
7.56272	without	1	one_substrate_one_product
17.9158	without	1	one_substrate_one_product
17.9158	without	1	one_substrate_one_product
7.69593	without	1	one_substrate_one_product
7.69593	without	1	one_substrate_one_product
7.16448	without	1	one_substrate_one_product
6.57748	without	1	one_substrate_one_product
6.06488	without	1	one_substrate_one_product
7.95103	without	1	one_substrate_one_product
7.50851	without	1	one_substrate_one_product
7.50851	without	1	one_substrate_one_product
7.99302	without	1	one_substrate_one_product
7.69593	without	1	one_substrate_one_product
7.69593	without	1	one_substrate_one_product
6.86595	without	1	one_substrate_one_product
7.86972	without	1	one_substrate_one_product
7.92816	without	1	one_substrate_one_product
10.3038	without	1	one_substrate_one_product
10.3038	without	1	one_substrate_one_product
6.31928	without	1	one_substrate_one_product
6.31928	without	1	one_substrate_one_product
7.00358	without	1	one_substrate_one_product
9.35174	without	1	one_substrate_one_product
9.35174	without	1	one_substrate_one_product
9.91069	without	1	one_substrate_one_product
16.2049	without	1	one_substrate_one_product
9.19192	without	1	one_substrate_one_product
9.19192	without	1	one_substrate_one_product
7.63539	without	1	one_substrate_one_product
7.63539	without	1	one_substrate_one_product
7.21948	without	1	one_substrate_one_product
7.21948	without	1	one_substrate_one_product
6.73539	without	1	one_substrate_one_product
6.68849	without	1	one_substrate_one_product
17.7962	without	1	one_substrate_one_product
6.45479	without	1	one_substrate_one_product
6.9155	without	1	one_substrate_one_product
7.23458	without	1	one_substrate_one_product
7.23458	without	1	one_substrate_one_product
12.4988	without	1	one_substrate_one_product
7.60122	without	1	one_substrate_one_product
7.26246	without	1	one_substrate_one_product
8.3723	without	1	one_substrate_one_product
8.3723	without	1	one_substrate_one_product
9.45009	without	1	one_substrate_one_product
7.69593	without	1	one_substrate_one_product
7.00493	without	1	one_substrate_one_product
7.00493	without	1	one_substrate_one_product
6.13022	without	1	one_substrate_one_product
7.67373	without	1	one_substrate_one_product
9.37337	without	1	one_substrate_one_product
7.36282	without	1	one_substrate_one_product
11.504	without	1	one_substrate_one_product
8.96195	without	1	one_substrate_one_product
8.81133	without	1	one_substrate_one_product
7.98322	without	1	one_substrate_one_product
7.42931	without	1	one_substrate_one_product
12.7959	without	1	one_substrate_one_product
12.7959	without	1	one_substrate_one_product
7.4052	without	1	one_substrate_one_product
7.74131	without	1	one_substrate_one_product
8.02728	without	1	one_substrate_one_product
8.02728	without	1	one_substrate_one_product
7.20098	without	1	one_substrate_one_product
6.58722	without	1	one_substrate_one_product
9.28073	without	1	one_substrate_one_product
7.27429	without	1	one_substrate_one_product
7.8031	without	1	one_substrate_one_product
7.69504	without	1	one_substrate_one_product
6.65522	without	1	one_substrate_one_product
7.58976	without	1	one_substrate_one_product
7.57981	without	1	one_substrate_one_product
6.53924	without	1	one_substrate_one_product
9.57475	without	1	one_substrate_one_product
9.57475	without	1	one_substrate_one_product
6.48942	without	1	one_substrate_one_product
11.504	without	1	one_substrate_one_product
11.504	without	1	one_substrate_one_product
6.19438	without	1	one_substrate_one_product
7.69593	without	1	one_substrate_one_product
9.19192	without	1	one_substrate_one_product
9.19192	without	1	one_substrate_one_product
10.3085	without	1	one_substrate_one_product
6.89156	without	1	one_substrate_one_product
6.89156	without	1	one_substrate_one_product
9.73958	without	1	one_substrate_one_product
10.7309	without	1	one_substrate_one_product
10.7309	without	1	one_substrate_one_product
7.49184	without	1	one_substrate_one_product
9.79988	without	1	one_substrate_one_product
10.3085	without	1	one_substrate_one_product
7.20811	without	1	one_substrate_one_product
9.19976	without	1	one_substrate_one_product
8.08988	without	1	one_substrate_one_product
6.74487	without	1	one_substrate_one_product
7.69593	without	1	one_substrate_one_product
7.23458	without	1	one_substrate_one_product
10.3038	without	1	one_substrate_one_product
10.0339	without	1	one_substrate_one_product
8.24502	without	1	one_substrate_one_product
8.96195	without	1	one_substrate_one_product
7.95044	without	1	one_substrate_one_product
13.2866	without	1	one_substrate_one_product
8.2513	without	1	one_substrate_one_product
15.8439	without	1	one_substrate_one_product
9.08728	without	1	one_substrate_one_product
7.69593	without	1	one_substrate_one_product
7.66624	without	1	one_substrate_one_product
7.54727	without	1	one_substrate_one_product
7.19681	without	1	one_substrate_one_product
7.75614	without	1	one_substrate_one_product
9.1482	without	1	one_substrate_one_product
7.62606	without	1	one_substrate_one_product
6.72683	without	1	one_substrate_one_product
6.6948	without	1	one_substrate_one_product
7.93803	without	1	one_substrate_one_product
9.30941	without	1	one_substrate_one_product
6.37598	without	1	one_substrate_one_product
8.46715	without	1	one_substrate_one_product
8.46715	without	1	one_substrate_one_product
10.066	without	1	one_substrate_one_product
10.066	without	1	one_substrate_one_product
7.65619	without	1	one_substrate_one_product
7.81508	without	1	one_substrate_one_product
9.70751	without	1	one_substrate_one_product
7.55427	without	1	one_substrate_one_product
6.7241	without	1	one_substrate_one_product
8.17294	without	1	one_substrate_one_product
6.42696	without	1	one_substrate_one_product
8.41007	without	1	one_substrate_one_product
9.19192	without	1	one_substrate_one_product
10.0339	without	1	one_substrate_one_product
7.37227	without	1	one_substrate_one_product
7.07928	without	1	one_substrate_one_product
8.52477	without	1	one_substrate_one_product
7.69593	without	1	one_substrate_one_product
6.56416	without	1	one_substrate_one_product
9.1811	without	1	one_substrate_one_product
7.88764	without	1	one_substrate_one_product
7.69593	without	1	one_substrate_one_product
6.27099	without	1	one_substrate_one_product
7.43319	without	1	one_substrate_one_product
7.43319	without	1	one_substrate_one_product
7.48659	without	1	one_substrate_one_product
8.57482	without	1	one_substrate_one_product
7.0527	without	1	one_substrate_one_product
7.69593	without	1	one_substrate_one_product
7.69593	without	1	one_substrate_one_product
6.82031	without	1	one_substrate_one_product
8.83489	without	1	one_substrate_one_product
8.3174	without	1	one_substrate_one_product
6.89657	without	1	one_substrate_one_product
7.69593	without	1	one_substrate_one_product
7.73524	without	1	one_substrate_one_product
6.34483	without	1	one_substrate_one_product
7.48915	without	1	one_substrate_one_product
6.50436	without	1	one_substrate_one_product
6.86872	without	1	one_substrate_one_product
7.56472	without	1	one_substrate_one_product
8.46942	without	1	one_substrate_one_product
9.0778	without	1	one_substrate_one_product
7.27919	without	1	one_substrate_one_product
6.77007	without	1	one_substrate_one_product
6.97447	without	1	one_substrate_one_product
6.97447	without	1	one_substrate_one_product
9.0778	without	1	one_substrate_one_product
7.69593	without	1	one_substrate_one_product
10.0246	without	1	one_substrate_one_product
7.69593	without	1	one_substrate_one_product
10.3085	without	1	one_substrate_one_product
7.69593	without	1	one_substrate_one_product
7.69593	without	1	one_substrate_one_product
7.73524	without	1	one_substrate_one_product
9.57475	without	1	one_substrate_one_product
7.35988	without	1	one_substrate_one_product
7.54044	without	1	one_substrate_one_product
8.1897	without	1	one_substrate_one_product
6.34336	without	1	one_substrate_one_product
7.69593	without	1	one_substrate_one_product
6.53961	without	1	one_substrate_one_product
7.4991	without	1	one_substrate_one_product
12.7936	without	1	one_substrate_one_product
12.7936	without	1	one_substrate_one_product
6.2366	without	1	one_substrate_one_product
17.0895	without	1	one_substrate_one_product
17.0895	without	1	one_substrate_one_product
7.89123	without	1	one_substrate_one_product
6.69171	without	1	one_substrate_one_product
6.69171	without	1	one_substrate_one_product
6.84188	without	1	one_substrate_one_product
7.30501	without	1	one_substrate_one_product
9.31147	without	1	one_substrate_one_product
9.31147	without	1	one_substrate_one_product
8.09313	without	1	one_substrate_one_product
8.09313	without	1	one_substrate_one_product
7.89494	without	1	one_substrate_one_product
7.74131	without	1	one_substrate_one_product
7.74131	without	1	one_substrate_one_product
6.35092	without	1	one_substrate_one_product
7.69593	without	1	one_substrate_one_product
7.44217	without	1	one_substrate_one_product
7.44217	without	1	one_substrate_one_product
6.4829	without	1	one_substrate_one_product
12.5898	without	1	one_substrate_one_product
12.5898	without	1	one_substrate_one_product
10.3038	without	1	one_substrate_one_product
7.11239	without	1	one_substrate_one_product
6.24774	without	1	one_substrate_one_product
6.24774	without	1	one_substrate_one_product
6.43863	without	1	one_substrate_one_product
6.43863	without	1	one_substrate_one_product
7.52559	without	1	one_substrate_one_product
8.13128	without	1	one_substrate_one_product
13.4437	without	1	one_substrate_one_product
13.4437	without	1	one_substrate_one_product
6.14295	without	1	one_substrate_one_product
7.69593	without	1	one_substrate_one_product
7.82629	without	1	one_substrate_one_product
7.04731	without	1	one_substrate_one_product
7.25202	without	1	one_substrate_one_product
7.46489	without	1	one_substrate_one_product
6.80039	without	1	one_substrate_one_product
8.38254	without	1	one_substrate_one_product
8.56268	without	1	one_substrate_one_product
8.56268	without	1	one_substrate_one_product
9.32339	without	1	one_substrate_one_product
7.69593	without	1	one_substrate_one_product
9.7041	without	1	one_substrate_one_product
9.7041	without	1	one_substrate_one_product
9.39445	without	1	one_substrate_one_product
6.49143	without	1	one_substrate_one_product
10.2195	without	1	one_substrate_one_product
9.57475	without	1	one_substrate_one_product
16.3302	without	1	one_substrate_one_product
7.71829	without	1	one_substrate_one_product
6.19606	without	1	one_substrate_one_product
9.0778	without	1	one_substrate_one_product
7.57711	without	1	one_substrate_one_product
7.57711	without	1	one_substrate_one_product
6.13838	without	1	one_substrate_one_product
7.84666	without	1	one_substrate_one_product
7.84666	without	1	one_substrate_one_product
7.69709	without	1	one_substrate_one_product
6.88287	without	1	one_substrate_one_product
9.77958	without	1	one_substrate_one_product
6.64541	without	1	one_substrate_one_product
6.38892	without	1	one_substrate_one_product
6.76448	without	1	one_substrate_one_product
10.7309	without	1	one_substrate_one_product
10.7309	without	1	one_substrate_one_product
6.47651	without	1	one_substrate_one_product
6.80142	without	1	one_substrate_one_product
6.8716	without	1	one_substrate_one_product
10.8316	without	1	one_substrate_one_product
6.99638	without	1	one_substrate_one_product
8.38254	without	1	one_substrate_one_product
6.84499	without	1	one_substrate_one_product
6.55661	without	1	one_substrate_one_product
6.13743	without	1	one_substrate_one_product
6.69429	without	1	one_substrate_one_product
6.46803	without	1	one_substrate_one_product
6.80781	without	1	one_substrate_one_product
7.88764	without	1	one_substrate_one_product
7.82959	without	1	one_substrate_one_product
7.69593	without	1	one_substrate_one_product
7.60157	without	1	one_substrate_one_product
7.35234	without	1	one_substrate_one_product
7.84438	without	1	one_substrate_one_product
10.121	without	1	one_substrate_one_product
10.121	without	1	one_substrate_one_product
10.066	without	1	one_substrate_one_product
7.69593	without	1	one_substrate_one_product
7.69593	without	1	one_substrate_one_product
6.49934	without	1	one_substrate_one_product
7.78323	without	1	one_substrate_one_product
6.87865	without	1	one_substrate_one_product
6.66583	without	1	one_substrate_one_product
9.07897	without	1	one_substrate_one_product
7.06032	without	1	one_substrate_one_product
7.03738	without	1	one_substrate_one_product
6.45897	without	1	one_substrate_one_product
9.77958	without	1	one_substrate_one_product
9.77958	without	1	one_substrate_one_product
6.12368	without	1	one_substrate_one_product
7.96938	without	1	one_substrate_one_product
7.57711	without	1	one_substrate_one_product
6.9894	without	1	one_substrate_one_product
7.16431	without	1	one_substrate_one_product
7.16431	without	1	one_substrate_one_product
7.69593	without	1	one_substrate_one_product
7.26246	without	1	one_substrate_one_product
7.42655	without	1	one_substrate_one_product
8.22073	without	1	one_substrate_one_product
7.39207	without	1	one_substrate_one_product
10.0339	without	1	one_substrate_one_product
8.10121	without	1	one_substrate_one_product
8.2513	without	1	one_substrate_one_product
6.84621	without	1	one_substrate_one_product
13.4568	without	1	one_substrate_one_product
7.8098	without	1	one_substrate_one_product
7.8098	without	1	one_substrate_one_product
17.0825	without	1	one_substrate_one_product
6.26484	without	1	one_substrate_one_product
9.19192	without	1	one_substrate_one_product
7.20589	without	1	one_substrate_one_product
10.3038	without	1	one_substrate_one_product
9.19976	without	1	one_substrate_one_product
8.11192	without	1	one_substrate_one_product
11.504	without	1	one_substrate_one_product
5.85001	without	1	one_substrate_one_product
7.83515	without	1	one_substrate_one_product
7.69593	without	1	one_substrate_one_product
7.69593	without	1	one_substrate_one_product
6.73872	without	1	one_substrate_one_product
6.98471	without	1	one_substrate_one_product
7.32181	without	1	one_substrate_one_product
6.38522	without	1	one_substrate_one_product
7.98615	without	1	one_substrate_one_product
7.98615	without	1	one_substrate_one_product
7.52119	without	1	one_substrate_one_product
7.00349	without	1	one_substrate_one_product
9.7041	without	1	one_substrate_one_product
9.77114	without	1	one_substrate_one_product
10.929	without	1	one_substrate_one_product
6.90826	without	1	one_substrate_one_product
7.69593	without	1	one_substrate_one_product
9.19192	without	1	one_substrate_one_product
7.59744	without	1	one_substrate_one_product
9.7041	without	1	one_substrate_one_product
7.39574	without	1	one_substrate_one_product
6.61034	without	1	one_substrate_one_product
7.98263	without	1	one_substrate_one_product
6.54349	without	1	one_substrate_one_product
6.69613	without	1	one_substrate_one_product
7.95103	without	1	one_substrate_one_product
8.12256	without	1	one_substrate_one_product
10.066	without	1	one_substrate_one_product
7.13557	without	1	one_substrate_one_product
7.69593	without	1	one_substrate_one_product
9.7041	without	1	one_substrate_one_product
12.4988	without	1	one_substrate_one_product
11.504	without	1	one_substrate_one_product
6.43253	without	1	one_substrate_one_product
7.0576	without	1	one_substrate_one_product
7.17578	without	1	one_substrate_one_product
13.507	without	1	one_substrate_one_product
11.504	without	1	one_substrate_one_product
7.88764	without	1	one_substrate_one_product
9.7041	without	1	one_substrate_one_product
7.21162	without	1	one_substrate_one_product
7.38665	without	1	one_substrate_one_product
8.9676	without	1	one_substrate_one_product
7.69593	without	1	one_substrate_one_product
7.75421	without	1	one_substrate_one_product
7.98263	without	1	one_substrate_one_product
7.95103	without	1	one_substrate_one_product
9.77958	without	1	one_substrate_one_product
7.29479	without	1	one_substrate_one_product
7.29479	without	1	one_substrate_one_product
12.2598	without	1	one_substrate_one_product
9.7041	without	1	one_substrate_one_product
7.22428	without	1	one_substrate_one_product
6.64403	without	1	one_substrate_one_product
6.14113	without	1	one_substrate_one_product
9.19192	without	1	one_substrate_one_product
7.90178	without	1	one_substrate_one_product
7.07653	without	1	one_substrate_one_product
7.07653	without	1	one_substrate_one_product
7.76854	without	1	one_substrate_one_product
6.47633	without	1	one_substrate_one_product
7.73524	without	1	one_substrate_one_product
7.73799	without	1	one_substrate_one_product
6.34793	without	1	one_substrate_one_product
7.24764	without	1	one_substrate_one_product
7.17029	without	1	one_substrate_one_product
7.69593	without	1	one_substrate_one_product
10.3085	without	1	one_substrate_one_product
8.51078	without	1	one_substrate_one_product
10.7431	without	1	one_substrate_one_product
7.26246	without	1	one_substrate_one_product
7.26246	without	1	one_substrate_one_product
8.46715	without	1	one_substrate_one_product
8.46715	without	1	one_substrate_one_product
7.14084	without	1	one_substrate_one_product
7.31048	without	1	one_substrate_one_product
9.08728	without	1	one_substrate_one_product
6.37598	without	1	one_substrate_one_product
12.7959	without	1	one_substrate_one_product
10.3395	without	1	one_substrate_one_product
6.95567	without	1	one_substrate_one_product
6.86346	without	1	one_substrate_one_product
7.61515	without	1	one_substrate_one_product
8.81213	without	1	one_substrate_one_product
7.69593	without	1	one_substrate_one_product
11.951	without	1	one_substrate_one_product
11.951	without	1	one_substrate_one_product
8.23957	without	1	one_substrate_one_product
6.37258	without	1	one_substrate_one_product
9.07897	without	1	one_substrate_one_product
7.15455	without	1	one_substrate_one_product
7.15455	without	1	one_substrate_one_product
6.90052	without	1	one_substrate_one_product
9.68502	without	1	one_substrate_one_product
9.7041	without	1	one_substrate_one_product
6.08619	without	1	one_substrate_one_product
6.79472	without	1	one_substrate_one_product
6.79472	without	1	one_substrate_one_product
6.74389	without	1	one_substrate_one_product
9.0778	without	1	one_substrate_one_product
9.45164	without	1	one_substrate_one_product
7.33677	without	1	one_substrate_one_product
12.7959	without	1	one_substrate_one_product
6.74748	without	1	one_substrate_one_product
10.3858	without	1	one_substrate_one_product
10.3858	without	1	one_substrate_one_product
7.26246	without	1	one_substrate_one_product
7.26246	without	1	one_substrate_one_product
8.422	without	1	one_substrate_one_product
7.86233	without	1	one_substrate_one_product
6.7941	without	1	one_substrate_one_product
6.89726	without	1	one_substrate_one_product
7.96961	without	1	one_substrate_one_product
12.7959	without	1	one_substrate_one_product
12.7959	without	1	one_substrate_one_product
8.26464	without	1	one_substrate_one_product
8.18327	without	1	one_substrate_one_product
8.18327	without	1	one_substrate_one_product
8.02054	without	1	one_substrate_one_product
7.46302	without	1	one_substrate_one_product
7.46302	without	1	one_substrate_one_product
6.24159	without	1	one_substrate_one_product
8.10329	without	1	one_substrate_one_product
8.96195	without	1	one_substrate_one_product
7.17743	without	1	one_substrate_one_product
7.05644	without	1	one_substrate_one_product
7.69593	without	1	one_substrate_one_product
7.5937	without	1	one_substrate_one_product
9.19861	without	1	one_substrate_one_product
6.20048	without	1	one_substrate_one_product
6.17514	without	1	one_substrate_one_product
7.21689	without	1	one_substrate_one_product
9.53342	without	1	one_substrate_one_product
9.53342	without	1	one_substrate_one_product
6.83402	without	1	one_substrate_one_product
9.14332	without	1	one_substrate_one_product
9.14332	without	1	one_substrate_one_product
12.2732	without	1	one_substrate_one_product
12.2732	without	1	one_substrate_one_product
7.46113	without	1	one_substrate_one_product
6.42185	without	1	one_substrate_one_product
7.35988	without	1	one_substrate_one_product
6.11033	without	1	one_substrate_one_product
7.69593	without	1	one_substrate_one_product
9.7041	without	1	one_substrate_one_product
8.21265	without	1	one_substrate_one_product
7.62778	without	1	one_substrate_one_product
6.43735	without	1	one_substrate_one_product
7.32923	without	1	one_substrate_one_product
7.74755	without	1	one_substrate_one_product
7.05868	without	1	one_substrate_one_product
6.33018	without	1	one_substrate_one_product
10.4969	without	1	one_substrate_one_product
8.1833	without	1	one_substrate_one_product
6.93303	without	1	one_substrate_one_product
6.1517	without	1	one_substrate_one_product
6.93813	without	1	one_substrate_one_product
6.93813	without	1	one_substrate_one_product
12.2591	without	1	one_substrate_one_product
6.95457	without	1	one_substrate_one_product
13.1722	without	1	one_substrate_one_product
7.50555	without	1	one_substrate_one_product
8.15462	without	1	one_substrate_one_product
9.07897	without	1	one_substrate_one_product
6.51911	without	1	one_substrate_one_product
7.04571	without	1	one_substrate_one_product
9.07514	without	1	one_substrate_one_product
9.07514	without	1	one_substrate_one_product
6.57826	without	1	one_substrate_one_product
7.43935	without	1	one_substrate_one_product
7.43789	without	1	one_substrate_one_product
9.77958	without	1	one_substrate_one_product
7.2267	without	1	one_substrate_one_product
8.77617	without	1	one_substrate_one_product
6.27631	without	1	one_substrate_one_product
6.52038	without	1	one_substrate_one_product
8.14893	without	1	one_substrate_one_product
8.31951	without	1	one_substrate_one_product
8.31951	without	1	one_substrate_one_product
7.69593	without	1	one_substrate_one_product
6.0048	without	1	one_substrate_one_product
8.39614	without	1	one_substrate_one_product
7.44632	without	1	one_substrate_one_product
7.99167	without	1	one_substrate_one_product
7.69593	without	1	one_substrate_one_product
6.41148	without	1	one_substrate_one_product
6.78582	without	1	one_substrate_one_product
11.504	without	1	one_substrate_one_product
7.77305	without	1	one_substrate_one_product
8.06363	without	1	one_substrate_one_product
8.71996	without	1	one_substrate_one_product
7.33387	without	1	one_substrate_one_product
8.96195	without	1	one_substrate_one_product
7.69593	without	1	one_substrate_one_product
8.1897	without	1	one_substrate_one_product
9.77958	without	1	one_substrate_one_product
6.95567	without	1	one_substrate_one_product
5.94495	without	1	one_substrate_one_product
7.27472	without	1	one_substrate_one_product
7.69593	without	1	one_substrate_one_product
7.69593	without	1	one_substrate_one_product
6.73881	without	1	one_substrate_one_product
11.504	without	1	one_substrate_one_product
11.504	without	1	one_substrate_one_product
6.93888	without	1	one_substrate_one_product
6.14983	without	1	one_substrate_one_product
7.69593	without	1	one_substrate_one_product
6.75866	without	1	one_substrate_one_product
9.7041	without	1	one_substrate_one_product
6.56511	without	1	one_substrate_one_product
6.56511	without	1	one_substrate_one_product
6.23333	without	1	one_substrate_one_product
7.03583	without	1	one_substrate_one_product
9.77958	without	1	one_substrate_one_product
8.52477	without	1	one_substrate_one_product
7.69593	without	1	one_substrate_one_product
7.79409	without	1	one_substrate_one_product
12.4988	without	1	one_substrate_one_product
8.75821	without	1	one_substrate_one_product
8.27953	without	1	one_substrate_one_product
10.3038	without	1	one_substrate_one_product
7.41313	without	1	one_substrate_one_product
6.5696	without	1	one_substrate_one_product
6.29168	without	1	one_substrate_one_product
12.7959	without	1	one_substrate_one_product
12.7959	without	1	one_substrate_one_product
6.31393	without	1	one_substrate_one_product
6.70751	without	1	one_substrate_one_product
7.18619	without	1	one_substrate_one_product
7.18619	without	1	one_substrate_one_product
8.47827	without	1	one_substrate_one_product
8.47827	without	1	one_substrate_one_product
8.13021	without	1	one_substrate_one_product
7.61985	without	1	one_substrate_one_product
8.39614	without	1	one_substrate_one_product
6.32225	without	1	one_substrate_one_product
7.01315	without	1	one_substrate_one_product
8.70308	without	1	one_substrate_one_product
8.13786	without	1	one_substrate_one_product
6.12186	without	1	one_substrate_one_product
8.77784	without	1	one_substrate_one_product
6.92813	without	1	one_substrate_one_product
7.69593	without	1	one_substrate_one_product
6.62271	without	1	one_substrate_one_product
9.07514	without	1	one_substrate_one_product
7.78313	without	1	one_substrate_one_product
8.11426	without	1	one_substrate_one_product
8.11426	without	1	one_substrate_one_product
7.69593	without	1	one_substrate_one_product
7.69593	without	1	one_substrate_one_product
11.9218	without	1	one_substrate_one_product
11.9218	without	1	one_substrate_one_product
7.44819	without	1	one_substrate_one_product
7.11829	without	1	one_substrate_one_product
6.59027	without	1	one_substrate_one_product
8.15315	without	1	one_substrate_one_product
7.03498	without	1	one_substrate_one_product
8.91152	without	1	one_substrate_one_product
7.30501	without	1	one_substrate_one_product
7.56721	without	1	one_substrate_one_product
7.56721	without	1	one_substrate_one_product
6.00201	without	1	one_substrate_one_product
11.504	without	1	one_substrate_one_product
6.07508	without	1	one_substrate_one_product
7.71276	without	1	one_substrate_one_product
7.25301	without	1	one_substrate_one_product
8.12831	without	1	one_substrate_one_product
7.74091	without	1	one_substrate_one_product
6.87591	without	1	one_substrate_one_product
6.87193	without	1	one_substrate_one_product
8.26453	without	1	one_substrate_one_product
6.34355	without	1	one_substrate_one_product
6.47399	without	1	one_substrate_one_product
7.69593	without	1	one_substrate_one_product
7.69593	without	1	one_substrate_one_product
9.19081	without	1	one_substrate_one_product
7.32587	without	1	one_substrate_one_product
7.23142	without	1	one_substrate_one_product
7.23142	without	1	one_substrate_one_product
7.26859	without	1	one_substrate_one_product
9.19861	without	1	one_substrate_one_product
7.07778	without	1	one_substrate_one_product
7.07778	without	1	one_substrate_one_product
10.7309	without	1	one_substrate_one_product
10.7309	without	1	one_substrate_one_product
7.13379	without	1	one_substrate_one_product
7.12613	without	1	one_substrate_one_product
6.78958	without	1	one_substrate_one_product
6.84439	without	1	one_substrate_one_product
7.98615	without	1	one_substrate_one_product
7.98615	without	1	one_substrate_one_product
6.39518	without	1	one_substrate_one_product
6.39518	without	1	one_substrate_one_product
9.16276	without	1	one_substrate_one_product
7.82996	without	1	one_substrate_one_product
7.82996	without	1	one_substrate_one_product
8.1833	without	1	one_substrate_one_product
7.08139	without	1	one_substrate_one_product
6.36208	without	1	one_substrate_one_product
9.28073	without	1	one_substrate_one_product
7.82361	without	1	one_substrate_one_product
8.57482	without	1	one_substrate_one_product
8.57482	without	1	one_substrate_one_product
10.3038	without	1	one_substrate_one_product
10.3038	without	1	one_substrate_one_product
9.33472	without	1	one_substrate_one_product
9.33472	without	1	one_substrate_one_product
6.94149	without	1	one_substrate_one_product
7.69593	without	1	one_substrate_one_product
9.35174	without	1	one_substrate_one_product
9.35174	without	1	one_substrate_one_product
7.4896	without	1	one_substrate_one_product
7.4896	without	1	one_substrate_one_product
7.48912	without	1	one_substrate_one_product
7.85201	without	1	one_substrate_one_product
8.63874	without	1	one_substrate_one_product
6.69655	without	1	one_substrate_one_product
7.69593	without	1	one_substrate_one_product
7.69593	without	1	one_substrate_one_product
7.19596	without	1	one_substrate_one_product
7.19596	without	1	one_substrate_one_product
11.8968	without	1	one_substrate_one_product
11.8968	without	1	one_substrate_one_product
6.82639	without	1	one_substrate_one_product
6.9351	without	1	one_substrate_one_product
6.65046	without	1	one_substrate_one_product
6.65046	without	1	one_substrate_one_product
7.69593	without	1	one_substrate_one_product
6.5261	without	1	one_substrate_one_product
8.07637	without	1	one_substrate_one_product
9.31147	without	1	one_substrate_one_product
12.7959	without	1	one_substrate_one_product
8.57977	without	1	one_substrate_one_product
7.36626	without	1	one_substrate_one_product
7.81728	without	1	one_substrate_one_product
7.81728	without	1	one_substrate_one_product
6.90119	without	1	one_substrate_one_product
7.31048	without	1	one_substrate_one_product
6.80154	without	1	one_substrate_one_product
6.95825	without	1	one_substrate_one_product
7.24907	without	1	one_substrate_one_product
6.76098	without	1	one_substrate_one_product
6.76098	without	1	one_substrate_one_product
7.5937	without	1	one_substrate_one_product
6.67539	without	1	one_substrate_one_product
10.7431	without	1	one_substrate_one_product
10.7431	without	1	one_substrate_one_product
9.28073	without	1	one_substrate_one_product
6.8626	without	1	one_substrate_one_product
7.41313	without	1	one_substrate_one_product
7.69593	without	1	one_substrate_one_product
7.17534	without	1	one_substrate_one_product
6.43253	without	1	one_substrate_one_product
6.83239	without	1	one_substrate_one_product
8.2513	without	1	one_substrate_one_product
8.2513	without	1	one_substrate_one_product
10.7309	without	1	one_substrate_one_product
10.7309	without	1	one_substrate_one_product
7.69593	without	1	one_substrate_one_product
7.69593	without	1	one_substrate_one_product
6.66717	without	1	one_substrate_one_product
7.34279	without	1	one_substrate_one_product
7.34279	without	1	one_substrate_one_product
7.47188	without	1	one_substrate_one_product
6.60564	without	1	one_substrate_one_product
6.51224	without	1	one_substrate_one_product
7.41533	without	1	one_substrate_one_product
7.96913	without	1	one_substrate_one_product
7.05974	without	1	one_substrate_one_product
6.33993	without	1	one_substrate_one_product
12.027	without	1	one_substrate_one_product
7.8784	without	1	one_substrate_one_product
7.76378	without	1	one_substrate_one_product
8.94634	without	1	one_substrate_one_product
7.69593	without	1	one_substrate_one_product
7.52385	without	1	one_substrate_one_product
6.44932	without	1	one_substrate_one_product
5.99174	without	1	one_substrate_one_product
9.1482	without	1	one_substrate_one_product
9.54663	without	1	one_substrate_one_product
8.46942	without	1	one_substrate_one_product
6.77373	without	1	one_substrate_one_product
6.20186	without	1	one_substrate_one_product
6.75119	without	1	one_substrate_one_product
6.49094	without	1	one_substrate_one_product
12.4988	without	1	one_substrate_one_product
6.58116	without	1	one_substrate_one_product
7.326	without	1	one_substrate_one_product
7.326	without	1	one_substrate_one_product
7.63106	without	1	one_substrate_one_product
7.14172	without	1	one_substrate_one_product
6.97694	without	1	one_substrate_one_product
9.75241	without	1	one_substrate_one_product
6.31115	without	1	one_substrate_one_product
9.77958	without	1	one_substrate_one_product
7.82629	without	1	one_substrate_one_product
7.82629	without	1	one_substrate_one_product
8.25601	without	1	one_substrate_one_product
6.95567	without	1	one_substrate_one_product
6.95567	without	1	one_substrate_one_product
7.79046	without	1	one_substrate_one_product
7.69593	without	1	one_substrate_one_product
10.3038	without	1	one_substrate_one_product
10.3038	without	1	one_substrate_one_product
8.99676	without	1	one_substrate_one_product
8.99676	without	1	one_substrate_one_product
10.0339	without	1	one_substrate_one_product
10.0339	without	1	one_substrate_one_product
8.75821	without	1	one_substrate_one_product
8.32279	without	1	one_substrate_one_product
9.41921	without	1	one_substrate_one_product
6.12807	without	1	one_substrate_one_product
8.75821	without	1	one_substrate_one_product
6.97284	without	1	one_substrate_one_product
7.36693	without	1	one_substrate_one_product
7.36693	without	1	one_substrate_one_product
7.18482	without	1	one_substrate_one_product
7.40891	without	1	one_substrate_one_product
8.70051	without	1	one_substrate_one_product
8.70051	without	1	one_substrate_one_product
9.7041	without	1	one_substrate_one_product
6.79455	without	1	one_substrate_one_product
8.36414	without	1	one_substrate_one_product
8.36414	without	1	one_substrate_one_product
6.2189	without	1	one_substrate_one_product
8.11426	without	1	one_substrate_one_product
8.11426	without	1	one_substrate_one_product
8.34937	without	1	one_substrate_one_product
7.39207	without	1	one_substrate_one_product
7.39207	without	1	one_substrate_one_product
6.97072	without	1	one_substrate_one_product
7.24524	without	1	one_substrate_one_product
7.43317	without	1	one_substrate_one_product
15.9388	without	1	one_substrate_one_product
7.69593	without	1	one_substrate_one_product
6.11699	without	1	one_substrate_one_product
7.73453	without	1	one_substrate_one_product
7.73453	without	1	one_substrate_one_product
6.82974	without	1	one_substrate_one_product
6.87865	without	1	one_substrate_one_product
8.93068	without	1	one_substrate_one_product
6.93793	without	1	one_substrate_one_product
6.2369	without	1	one_substrate_one_product
7.3683	without	1	one_substrate_one_product
6.64212	without	1	one_substrate_one_product
7.27217	without	1	one_substrate_one_product
10.9725	without	1	one_substrate_one_product
6.45262	without	1	one_substrate_one_product
12.4988	without	1	one_substrate_one_product
12.4988	without	1	one_substrate_one_product
6.22481	without	1	one_substrate_one_product
6.20048	without	1	one_substrate_one_product
8.39614	without	1	one_substrate_one_product
6.21613	without	1	one_substrate_one_product
10.3085	without	1	one_substrate_one_product
11.8112	without	1	one_substrate_one_product
7.81445	without	1	one_substrate_one_product
6.95567	without	1	one_substrate_one_product
11.504	without	1	one_substrate_one_product
11.504	without	1	one_substrate_one_product
7.49331	without	1	one_substrate_one_product
7.08939	without	1	one_substrate_one_product
8.37332	without	1	one_substrate_one_product
[truncated: 36,659 more rows]

## Sheet: Figure 2B 
		Correct EC is top prediction	Correct EC in prediction list	Mean Precision	Mean Recall	Macro F1-Score		Subset to insure at least 3 of each unique EC in serial designation:		Correct EC is top prediction	Correct EC in prediction list	Mean Precision	Mean Recall	Macro F1-Score
Class	Overall	0.831597	0.845486	0.744848	0.885455	0.809088		Class	Overall	0.883333	0.894444	0.770245	0.909605	0.834144
	EC1 (N=96)	0.916667	0.916667	0.930108	0.946237	0.938103			EC1 (N=30)	0.966667	0.966667	0.933333	0.966667	0.949708
	EC2 (N=96)	0.729167	0.75	0.766667	0.8	0.782979			EC2 (N=30)	0.866667	0.9	0.928571	0.964286	0.946092
	EC3 (N=96)	0.791667	0.802083	0.758242	0.846154	0.799789			EC3 (N=30)	0.733333	0.733333	0.683333	0.733333	0.707451
	EC4 (N=96)	0.666667	0.6875	0.678295	0.767442	0.72012			EC4 (N=30)	0.766667	0.766667	0.672414	0.793103	0.727789
	EC5 (N=96)	0.90625	0.9375	0.833333	0.947368	0.8867			EC5 (N=30)	0.966667	1	0.916667	1	0.956522
	EC6 (N=96)	0.979167	0.979167	0.501754	0.989474	0.665858			EC6 (N=30)	1	1	0.494444	1	0.66171
Sub-class	Overall	0.751736	0.779514	0.687696	0.845574	0.758507		Sub-class	Overall	0.822222	0.855556	0.722538	0.875	0.791494
	EC1 (N=96)	0.78125	0.854167	0.68315	0.901099	0.777133			EC1 (N=30)	0.8	0.866667	0.666667	0.896552	0.764706
	EC2 (N=96)	0.697917	0.71875	0.825	0.8625	0.843333			EC2 (N=30)	0.9	0.9	0.904762	0.964286	0.933576
	EC3 (N=96)	0.71875	0.760417	0.709259	0.811111	0.756774			EC3 (N=30)	0.633333	0.733333	0.666667	0.733333	0.698413
	EC4 (N=96)	0.614583	0.635417	0.6893	0.753086	0.719783			EC4 (N=30)	0.766667	0.766667	0.741379	0.793103	0.76637
	EC5 (N=96)	0.770833	0.78125	0.728723	0.797872	0.761732			EC5 (N=30)	0.866667	0.9	0.85	0.9	0.874286
	EC6 (N=96)	0.927083	0.927083	0.514035	0.936842	0.663832			EC6 (N=30)	0.966667	0.966667	0.516667	0.966667	0.673408
Sub-sub-class	Overall	0.670139	0.708333	0.654468	0.775665	0.709931		Sub-sub-class	Overall	0.794444	0.822222	0.711905	0.845714	0.773062
	EC1 (N=96)	0.760417	0.822917	0.664835	0.868132	0.753003			EC1 (N=30)	0.8	0.866667	0.681034	0.896552	0.774072
	EC2 (N=96)	0.6875	0.708333	0.840909	0.883117	0.861496			EC2 (N=30)	0.9	0.9	0.95679	1	0.977918
	EC3 (N=96)	0.645833	0.71875	0.672285	0.775281	0.720119			EC3 (N=30)	0.633333	0.7	0.65	0.7	0.674074
	EC4 (N=96)	0.614583	0.635417	0.697531	0.753086	0.724245			EC4 (N=30)	0.766667	0.766667	0.741379	0.793103	0.76637
	EC5 (N=96)	0.666667	0.697917	0.66129	0.72043	0.689595			EC5 (N=30)	0.733333	0.766667	0.716667	0.766667	0.740824
	EC6 (N=96)	0.645833	0.666667	0.433333	0.673684	0.527417			EC6 (N=30)	0.933333	0.933333	0.55	0.933333	0.692135
Serial designation	Overall	0.371528	0.388889	0.371094	0.4375	0.40157		Serial designation	Overall	0.65	0.7	0.644762	0.72	0.680307
	EC1 (N=96)	0.479167	0.520833	0.438202	0.561798	0.492362			EC1 (N=30)	0.666667	0.733333	0.637931	0.758621	0.693061
	EC2 (N=96)	0.28125	0.291667	0.319444	0.388889	0.350763			EC2 (N=30)	0.633333	0.666667	0.641975	0.740741	0.687831
	EC3 (N=96)	0.427083	0.4375	0.431818	0.477273	0.453409			EC3 (N=30)	0.533333	0.6	0.55	0.6	0.573913
	EC4 (N=96)	0.25	0.270833	0.282051	0.333333	0.305556			EC4 (N=30)	0.566667	0.666667	0.586207	0.689655	0.633737
	EC5 (N=96)	0.4375	0.447917	0.396739	0.467391	0.429177			EC5 (N=30)	0.633333	0.633333	0.6	0.633333	0.616216
	EC6 (N=96)	0.354167	0.364583	0.33871	0.376344	0.356537			EC6 (N=30)	0.866667	0.9	0.85	0.9	0.874286
