# Supplementary material for: SIMMER employs similarity algorithms to accurately identify human gut microbiome species and enzymes capable of known chemical transformations
Source: eLife. 2023 Jun 12;12:e82401. doi: 10.7554/eLife.82401 (PMC10289814; doi:10.7554/eLife.82401)
Supplement: Figure 4—source data 1. [file elife-82401-fig4-data1.xlsx]

## Sheet: expanded positive control set
		Filtering methods
Enzyme	UHGG	RNA-seq	Jejunum_ileum	SEA	Intersection
20A-HSDH	7121	92	2608	4183	36
20B-HSDH	21941	951	7695	14922	460
azos_all	1816	21	241	258	1
bgus	7184	145	3469	4679	95
BT_0217	448	40	86	1	0
BT_1429	461	21	120	0	0
BT_2367	441	24	350	0	0
BT_4096	91	0	34	0	0
BT_4554	1120	109	491	547	70
cdd	210	2	97	44	2
cgr2	1268	49	353	433	16
dadh_R506	1094	14	314	24	0
NAT	294	0	59	176	0
NfsB_all	7352	258	1174	1037	11
preTA	330	5	144	227	3
TP	1789	27	880	1639	26
tyrDC	75	0	0	54	0
UP	2079	125	832	650	21
Median	1094	24	314	227	2
Range	21866	951	7695	14922	460

## Sheet: Figure 4
Enzyme	number literature sequences	literature sequences plus homologs found	number homologs found
20A-HSDH	1	37	36
20B-HSDH	2	462	460
BT_4554	1	71	70
NfsB	4	9	5
PreTA	8	24	16
TP	2	28	26
UP	2	23	21
azos_all	317	318	1
bgus	36	131	95
cdd	1	3	2
preTA	7	10	3

## Sheet: Figure 4-figure supplement 1
azos_all RNAseq matches	azos_all jejunem/ileum matches	azos_all SEA matches	20A-HSDH RNAseq matches	20A-HSDH jejunem/ileum matches	20A-HSDH SEA matches	BT_4554 RNAseq matches	BT_4554 jejunem/ileum matches	BT_4554 SEA matches	BT_4096 RNAseq matches	BT_4096 jejunem/ileum matches	BT_4096 SEA matches	NfsB_all RNAseq matches	NfsB_all jejunem/ileum matches	NfsB_all SEA matches	n-demethylase RNAseq matches	n-demethylase jejunem/ileum matches	n-demethylase SEA matches	NfsB RNAseq matches	NfsB jejunem/ileum matches	NfsB SEA matches	bgus RNAseq matches	bgus jejunem/ileum matches	bgus SEA matches	BT_2367 RNAseq matches	BT_2367 jejunem/ileum matches	BT_2367 SEA matches	20B-HSDH RNAseq matches	20B-HSDH jejunem/ileum matches	20B-HSDH SEA matches	UP RNAseq matches	UP jejunem/ileum matches	UP SEA matches	cdd RNAseq matches	cdd jejunem/ileum matches	cdd SEA matches	NAT RNAseq matches	NAT jejunem/ileum matches	NAT SEA matches	dadh_R506 RNAseq matches	dadh_R506 jejunem/ileum matches	dadh_R506 SEA matches	preTA RNAseq matches	preTA jejunem/ileum matches	preTA SEA matches	TP RNAseq matches	TP jejunem/ileum matches	TP SEA matches	cgr2 RNAseq matches	cgr2 jejunem/ileum matches
GUT_GENOME145983_01527	GUT_GENOME141809_00027	GUT_GENOME141809_00027	GUT_GENOME140342_01191	GUT_GENOME231920_03042	GUT_GENOME122014_00573	GUT_GENOME109512_02533	GUT_GENOME109512_02533	GUT_GENOME109512_02533		GUT_GENOME000035_02956	0	GUT_GENOME122359_03231	GUT_GENOME044788_01226	GUT_GENOME273734_01270	0	GUT_GENOME000559_03048	0	GUT_GENOME122359_03231	GUT_GENOME044788_01226	GUT_GENOME273734_01270	GUT_GENOME000655_01483	GUT_GENOME002382_03123	GUT_GENOME002382_03123	GUT_GENOME159262_03161	GUT_GENOME135463_01908	0	GUT_GENOME000231_02280	GUT_GENOME024536_00487	GUT_GENOME024536_00487	GUT_GENOME176758_00540	GUT_GENOME018906_01104	GUT_GENOME029304_00344	GUT_GENOME176098_00738	GUT_GENOME001709_02788	GUT_GENOME126570_01112		GUT_GENOME171567_03958	GUT_GENOME140808_01275	GUT_GENOME210225_01197	GUT_GENOME147131_00245	GUT_GENOME234055_00373	GUT_GENOME000231_01020	GUT_GENOME000231_01020	GUT_GENOME000231_01020	GUT_GENOME139132_00156	GUT_GENOME096569_01038	GUT_GENOME096569_01038	GUT_GENOME095941_01354	GUT_GENOME155439_00856
GUT_GENOME159035_01200	GUT_GENOME144544_02510	GUT_GENOME027890_00043	GUT_GENOME140078_00252	GUT_GENOME000852_03414	GUT_GENOME141727_00151	GUT_GENOME147612_02191	GUT_GENOME000423_00496	GUT_GENOME258988_00797		GUT_GENOME000122_00815		GUT_GENOME143157_02321	GUT_GENOME022295_00613	GUT_GENOME143140_00585		GUT_GENOME171597_02950		GUT_GENOME143157_02321	GUT_GENOME228036_00662	GUT_GENOME141303_00645	GUT_GENOME143505_00185	GUT_GENOME001745_02836	GUT_GENOME001745_02836	GUT_GENOME140076_01905	GUT_GENOME256155_00458		GUT_GENOME229830_01225	GUT_GENOME212497_01376	GUT_GENOME117633_00540	GUT_GENOME044136_00544	GUT_GENOME000583_01993	GUT_GENOME035792_02058	GUT_GENOME259135_00702	GUT_GENOME140345_01075	GUT_GENOME269730_00091		GUT_GENOME140808_01275	GUT_GENOME143383_00456	GUT_GENOME230476_00936	GUT_GENOME096425_02222	GUT_GENOME128042_01220	GUT_GENOME108259_01747	GUT_GENOME096166_00861	GUT_GENOME220305_00337	GUT_GENOME000092_00476	GUT_GENOME176732_00119	GUT_GENOME103766_04155	GUT_GENOME156244_01830	GUT_GENOME096420_02235
GUT_GENOME140826_02176	GUT_GENOME147131_01375	GUT_GENOME095296_01859	GUT_GENOME143484_02806	GUT_GENOME143724_03428	GUT_GENOME231920_03042	GUT_GENOME229830_01170	GUT_GENOME207787_01685	GUT_GENOME207787_01685		GUT_GENOME246421_00743		GUT_GENOME133541_00386	GUT_GENOME142628_02838	GUT_GENOME145582_01438		GUT_GENOME177471_00307		GUT_GENOME019103_00626	GUT_GENOME142628_02838	GUT_GENOME000338_04681	GUT_GENOME000565_04368	GUT_GENOME281513_00837	GUT_GENOME001297_01604	GUT_GENOME000231_02932	GUT_GENOME276949_00031		GUT_GENOME145985_00811	GUT_GENOME122723_00227	GUT_GENOME207955_00680	GUT_GENOME095996_00080	GUT_GENOME001677_00434	GUT_GENOME157191_01215		GUT_GENOME103766_01711	GUT_GENOME243177_00881		GUT_GENOME247084_02654	GUT_GENOME143709_00626	GUT_GENOME143185_01561	GUT_GENOME156849_02374	GUT_GENOME275636_00993	GUT_GENOME143131_03820	GUT_GENOME236229_02102	GUT_GENOME096166_00861	GUT_GENOME001115_00348	GUT_GENOME103766_04155	GUT_GENOME015181_00999	GUT_GENOME096170_01306	GUT_GENOME128042_01114
GUT_GENOME025525_01495	GUT_GENOME000962_00553	GUT_GENOME095996_03202	GUT_GENOME011051_01112	GUT_GENOME142612_03654	GUT_GENOME000700_02434	GUT_GENOME218891_01697	GUT_GENOME096511_01984	GUT_GENOME258514_00755		GUT_GENOME140240_00215		GUT_GENOME251721_01389	GUT_GENOME000682_02699	GUT_GENOME010023_01443		GUT_GENOME096543_01228		GUT_GENOME096174_01292	GUT_GENOME001598_00993	GUT_GENOME210225_00493	GUT_GENOME102353_00512	GUT_GENOME001297_01604	GUT_GENOME017342_00815	GUT_GENOME206546_00734	GUT_GENOME007505_01234		GUT_GENOME147678_01341	GUT_GENOME038289_00551	GUT_GENOME016469_00976	GUT_GENOME000483_05100	GUT_GENOME000483_05100	GUT_GENOME251611_00327		GUT_GENOME000047_02225	GUT_GENOME141183_01412		GUT_GENOME000559_01102	GUT_GENOME000559_01102	GUT_GENOME132205_00387	GUT_GENOME031782_00630	GUT_GENOME211901_02049	GUT_GENOME016361_02373	GUT_GENOME255270_00506	GUT_GENOME210691_00867	GUT_GENOME140074_01530	GUT_GENOME199169_00388	GUT_GENOME171359_00311	GUT_GENOME143188_01067	GUT_GENOME195758_01076
GUT_GENOME276542_01846	GUT_GENOME156122_01339	GUT_GENOME002158_02317	GUT_GENOME158031_00853	GUT_GENOME237529_03130	GUT_GENOME000852_03414	GUT_GENOME097137_01059	GUT_GENOME115718_00587	GUT_GENOME096511_01984		GUT_GENOME126719_00715		GUT_GENOME019103_00626	GUT_GENOME253287_00337	GUT_GENOME210225_00493		GUT_GENOME000483_00100		GUT_GENOME147854_02297	GUT_GENOME096174_01292	GUT_GENOME232218_01658	GUT_GENOME251721_01301	GUT_GENOME279992_00739	GUT_GENOME279992_00739	GUT_GENOME102353_02610	GUT_GENOME115838_02465		GUT_GENOME042029_00512	GUT_GENOME021430_01635	GUT_GENOME096497_03407	GUT_GENOME157191_01215	GUT_GENOME157191_01215	GUT_GENOME257450_00202		GUT_GENOME147525_01391	GUT_GENOME000889_00557		GUT_GENOME141436_02776	GUT_GENOME251098_00549	GUT_GENOME195667_01435	GUT_GENOME266127_00884	GUT_GENOME141089_00529	GUT_GENOME096473_03585	GUT_GENOME149712_00295	GUT_GENOME141005_01484	GUT_GENOME209802_00599	GUT_GENOME045758_00541	GUT_GENOME278546_01806	GUT_GENOME230476_01714	GUT_GENOME031782_01440
GUT_GENOME096170_00174	GUT_GENOME283163_00626	GUT_GENOME141727_01227	GUT_GENOME115272_02381	GUT_GENOME095503_02042	GUT_GENOME143724_03428	GUT_GENOME143751_03762	GUT_GENOME108993_02593	GUT_GENOME115718_00587		GUT_GENOME096203_02998		GUT_GENOME253287_00337	GUT_GENOME001598_00993	GUT_GENOME141303_00645		GUT_GENOME141436_02123		GUT_GENOME096191_00978	GUT_GENOME217236_01069	GUT_GENOME032708_00167	GUT_GENOME143505_03252	GUT_GENOME001115_02083	GUT_GENOME095995_03085	GUT_GENOME000285_00399	GUT_GENOME096301_00330		GUT_GENOME000554_00633	GUT_GENOME283137_02259	GUT_GENOME001245_01910	GUT_GENOME155913_01528	GUT_GENOME092387_01579	GUT_GENOME008653_01377		GUT_GENOME188395_00952	GUT_GENOME126180_01701		GUT_GENOME145983_01411	GUT_GENOME145983_01411	GUT_GENOME096276_01607	GUT_GENOME097019_00765	GUT_GENOME089175_00201		GUT_GENOME097684_03914	GUT_GENOME255826_00451	GUT_GENOME123416_00496	GUT_GENOME171359_00311	GUT_GENOME000522_01568	GUT_GENOME155439_00856	GUT_GENOME176629_03363
GUT_GENOME256353_00477	GUT_GENOME155972_00824	GUT_GENOME232194_00124	GUT_GENOME174465_02341	GUT_GENOME095490_00554	GUT_GENOME096445_01400	GUT_GENOME108993_02593	GUT_GENOME118228_00456	GUT_GENOME108993_02593		GUT_GENOME096203_04670		GUT_GENOME017938_02086	GUT_GENOME228036_00662	GUT_GENOME000338_04681		GUT_GENOME141809_02792		GUT_GENOME000231_00697	GUT_GENOME147854_02297	GUT_GENOME237867_00608	GUT_GENOME000295_00950	GUT_GENOME140082_02647	GUT_GENOME001115_02083	GUT_GENOME143232_04064	GUT_GENOME010648_01159		GUT_GENOME069692_02408	GUT_GENOME025412_00338	GUT_GENOME140361_02032	GUT_GENOME026702_01921	GUT_GENOME000423_00496	GUT_GENOME113005_01387		GUT_GENOME176098_00738	GUT_GENOME207228_01847		GUT_GENOME143711_02293	GUT_GENOME095247_01577	GUT_GENOME230476_01782	GUT_GENOME147522_01005	GUT_GENOME243145_01445		GUT_GENOME096670_00456	GUT_GENOME255270_00506	GUT_GENOME215793_01201	GUT_GENOME001115_00348	GUT_GENOME140701_01227	GUT_GENOME143188_00040	GUT_GENOME209802_01758
GUT_GENOME143505_03956	GUT_GENOME207341_01377	GUT_GENOME141287_01806	GUT_GENOME142496_00919	GUT_GENOME001709_00625	GUT_GENOME141436_05752	GUT_GENOME073885_02083	GUT_GENOME153233_01522	GUT_GENOME175326_00961		GUT_GENOME251243_00188		GUT_GENOME117621_02353	GUT_GENOME194902_01343	GUT_GENOME191265_01410		GUT_GENOME096298_02655		GUT_GENOME149380_00917	GUT_GENOME156895_01111	GUT_GENOME233265_01716	GUT_GENOME095995_00164	GUT_GENOME096200_02506	GUT_GENOME237835_00218	GUT_GENOME143505_02654	GUT_GENOME101636_02770		GUT_GENOME143505_01337	GUT_GENOME208036_03200	GUT_GENOME008455_00415	GUT_GENOME176098_00613	GUT_GENOME143749_00478	GUT_GENOME112478_01048		GUT_GENOME149706_00866	GUT_GENOME093693_00820		GUT_GENOME256763_00912	GUT_GENOME143361_01713	GUT_GENOME143188_00020	GUT_GENOME096170_02263	GUT_GENOME019103_01497		GUT_GENOME243599_01422	GUT_GENOME149712_00295	GUT_GENOME225807_00825	GUT_GENOME095995_02042	GUT_GENOME273588_00859	GUT_GENOME247421_01325	GUT_GENOME033647_00407
GUT_GENOME140808_01331	GUT_GENOME141118_02128	GUT_GENOME151520_01428	GUT_GENOME001255_03886	GUT_GENOME239747_02155	GUT_GENOME142612_03654	GUT_GENOME118228_00456	GUT_GENOME264037_00868	GUT_GENOME118228_00456		GUT_GENOME096201_02245		GUT_GENOME139744_00929	GUT_GENOME062339_00163	GUT_GENOME117534_00419		GUT_GENOME147598_02538		GUT_GENOME000682_01675	GUT_GENOME149380_00917	GUT_GENOME000202_01404	GUT_GENOME001506_02330	GUT_GENOME276125_00205	GUT_GENOME276125_00205	GUT_GENOME000231_01027	GUT_GENOME196481_01648		GUT_GENOME029301_00385	GUT_GENOME096384_03621	GUT_GENOME122723_00897	GUT_GENOME000152_00918	GUT_GENOME123416_00502	GUT_GENOME130633_01520		GUT_GENOME145983_02156	GUT_GENOME140065_02885		GUT_GENOME232032_00751	GUT_GENOME141763_03532	GUT_GENOME195758_00574	GUT_GENOME207475_00793	GUT_GENOME147522_01507		GUT_GENOME119700_01229	GUT_GENOME253114_00317	GUT_GENOME268227_00159	GUT_GENOME096244_01032	GUT_GENOME096390_02173	GUT_GENOME155439_01465	GUT_GENOME225259_01773
GUT_GENOME096276_02194	GUT_GENOME096172_00412	GUT_GENOME141315_02656	GUT_GENOME239662_01056	GUT_GENOME098568_04565	GUT_GENOME237529_03130	GUT_GENOME096203_02595	GUT_GENOME155674_02609	GUT_GENOME098042_01119		GUT_GENOME195293_00549		GUT_GENOME111778_02334	GUT_GENOME139744_00929	GUT_GENOME140340_01331		GUT_GENOME145698_00642		GUT_GENOME231299_01656	GUT_GENOME260703_00904	GUT_GENOME096532_00524	GUT_GENOME000192_02025	GUT_GENOME231559_01720	GUT_GENOME199790_01475	GUT_GENOME096083_03321	GUT_GENOME152364_01175		GUT_GENOME151978_00911	GUT_GENOME140299_01355	GUT_GENOME185273_01787	GUT_GENOME018115_00450	GUT_GENOME139809_02015	GUT_GENOME250728_01696		GUT_GENOME147524_03268	GUT_GENOME277106_01510		GUT_GENOME095995_03342	GUT_GENOME096179_04308	GUT_GENOME096170_00356	GUT_GENOME080199_03652	GUT_GENOME034763_01239		GUT_GENOME249684_01385	GUT_GENOME061534_00361	GUT_GENOME247791_01030	GUT_GENOME000522_01568	GUT_GENOME251527_00572	GUT_GENOME143188_01126	GUT_GENOME231247_02171
GUT_GENOME144544_00650	GUT_GENOME096193_00850	GUT_GENOME155972_00824	GUT_GENOME131073_01744	GUT_GENOME097684_00946	GUT_GENOME255792_00211	GUT_GENOME140299_01342	GUT_GENOME143232_02989	GUT_GENOME153233_01522		GUT_GENOME207745_01021		GUT_GENOME001003_02113	GUT_GENOME097678_00031	GUT_GENOME232218_01658		GUT_GENOME145695_01012		GUT_GENOME101636_00512	GUT_GENOME000004_00627	GUT_GENOME111543_00754	GUT_GENOME231453_00052	GUT_GENOME231730_02325	GUT_GENOME231559_01720	GUT_GENOME095991_01767	GUT_GENOME246171_01181		GUT_GENOME140076_03896	GUT_GENOME256521_00340	GUT_GENOME253550_00729	GUT_GENOME097137_01059	GUT_GENOME098775_03292	GUT_GENOME158639_01212		GUT_GENOME096706_00893	GUT_GENOME000594_04111		GUT_GENOME143740_00271	GUT_GENOME274466_00012	GUT_GENOME096170_02263	GUT_GENOME096259_01947	GUT_GENOME096067_00615		GUT_GENOME052918_00876	GUT_GENOME252036_01707	GUT_GENOME095021_00678	GUT_GENOME257394_02044	GUT_GENOME284285_00402	GUT_GENOME096489_00083	GUT_GENOME000941_01786
GUT_GENOME096170_00201	GUT_GENOME148095_01036	GUT_GENOME034989_00898	GUT_GENOME095986_05115	GUT_GENOME001255_03886	GUT_GENOME194757_00272	GUT_GENOME143232_02989	GUT_GENOME117154_00093	GUT_GENOME264037_00868		GUT_GENOME096080_01536		GUT_GENOME096174_01292	GUT_GENOME191958_01605	GUT_GENOME098769_00210		GUT_GENOME232032_04459		GUT_GENOME143484_02505	GUT_GENOME000944_01789	GUT_GENOME277515_00046	GUT_GENOME042029_00376	GUT_GENOME113180_01373	GUT_GENOME231730_02325	GUT_GENOME253356_01965	GUT_GENOME138841_02949		GUT_GENOME155679_01602	GUT_GENOME143118_00877	GUT_GENOME276125_00802	GUT_GENOME123416_00502	GUT_GENOME111729_00310	GUT_GENOME244005_00634		GUT_GENOME095996_04056	GUT_GENOME024543_02227		GUT_GENOME143502_03113	GUT_GENOME103766_02469	GUT_GENOME195667_01857	GUT_GENOME025525_01477	GUT_GENOME000700_00072		GUT_GENOME000327_03024	GUT_GENOME096670_00456	GUT_GENOME137156_00626	GUT_GENOME232032_01832	GUT_GENOME158868_01817	GUT_GENOME096170_00147	GUT_GENOME096276_01403
GUT_GENOME132202_01052	GUT_GENOME000572_00694	GUT_GENOME243082_02191	GUT_GENOME040420_02338	GUT_GENOME096541_00918	GUT_GENOME095490_00554	GUT_GENOME096191_02911	GUT_GENOME276930_01008	GUT_GENOME155674_02609		GUT_GENOME096200_02477		GUT_GENOME147854_02297	GUT_GENOME191265_01410	GUT_GENOME001282_02748		GUT_GENOME231920_02821		GUT_GENOME041343_00938	GUT_GENOME155674_01701	GUT_GENOME278559_00616	GUT_GENOME140299_02161	GUT_GENOME001255_01662	GUT_GENOME117767_00007	GUT_GENOME096083_00128	GUT_GENOME096573_01670		GUT_GENOME143156_01833	GUT_GENOME096179_02212	GUT_GENOME142576_00088	GUT_GENOME143749_00478	GUT_GENOME096402_02764	GUT_GENOME141041_03397		GUT_GENOME143747_03227	GUT_GENOME176098_00738		GUT_GENOME143726_01374	GUT_GENOME096246_03207	GUT_GENOME143188_01725	GUT_GENOME177056_00434	GUT_GENOME000729_01591		GUT_GENOME181651_00587	GUT_GENOME097684_03914	GUT_GENOME001506_00219	GUT_GENOME263827_01047	GUT_GENOME147131_00540	GUT_GENOME195758_00963	GUT_GENOME082811_01018
GUT_GENOME000147_01891	GUT_GENOME140065_01085	GUT_GENOME207341_01377	GUT_GENOME109512_01659	GUT_GENOME153241_01890	GUT_GENOME000030_01876	GUT_GENOME001778_02242	GUT_GENOME117619_01957	GUT_GENOME143232_02989		GUT_GENOME140240_00187		GUT_GENOME140240_03399	GUT_GENOME096174_01292	GUT_GENOME145695_02865		GUT_GENOME000047_00622		GUT_GENOME001488_00729	GUT_GENOME141436_01502	GUT_GENOME156118_00940	GUT_GENOME000008_00442	GUT_GENOME159493_01138	GUT_GENOME113180_01373	GUT_GENOME001255_02677	GUT_GENOME263189_02189		GUT_GENOME253356_00514	GUT_GENOME268486_00346	GUT_GENOME017531_01024	GUT_GENOME143746_04058	GUT_GENOME114436_01801	GUT_GENOME153233_01522		GUT_GENOME259135_00702	GUT_GENOME274150_00381		GUT_GENOME231453_04430	GUT_GENOME000057_01716	GUT_GENOME095941_01348	GUT_GENOME143527_03174	GUT_GENOME096298_01095		GUT_GENOME000459_03118	GUT_GENOME243599_01422	GUT_GENOME156244_00683	GUT_GENOME121425_01173	GUT_GENOME001029_01213	GUT_GENOME195667_00403	GUT_GENOME128042_01327
GUT_GENOME231299_02116	GUT_GENOME000559_01203	GUT_GENOME068652_02637	GUT_GENOME126719_01363	GUT_GENOME004694_01557	GUT_GENOME100276_02409	GUT_GENOME000578_02888	GUT_GENOME171567_01858	GUT_GENOME022007_01318		GUT_GENOME143131_01388		GUT_GENOME000231_00697	GUT_GENOME096210_01222	GUT_GENOME088644_00501				GUT_GENOME239662_00476	GUT_GENOME096063_03703	GUT_GENOME141436_01502	GUT_GENOME140826_03923	GUT_GENOME218891_01621	GUT_GENOME093619_01685	GUT_GENOME239662_02252	GUT_GENOME139178_00352		GUT_GENOME237449_02070	GUT_GENOME101636_02998	GUT_GENOME122723_00227	GUT_GENOME103766_00467	GUT_GENOME095986_04471	GUT_GENOME000131_01050		GUT_GENOME000565_00014	GUT_GENOME149706_00866		GUT_GENOME103766_02469	GUT_GENOME212260_01960		GUT_GENOME145983_02222	GUT_GENOME279992_00161		GUT_GENOME097737_01197	GUT_GENOME141586_02004	GUT_GENOME036763_00227	GUT_GENOME143408_00891	GUT_GENOME000113_00323	GUT_GENOME143188_01120	GUT_GENOME096170_02527
GUT_GENOME036763_02468	GUT_GENOME145695_00818	GUT_GENOME233267_00156	GUT_GENOME246096_00810	GUT_GENOME137346_01339	GUT_GENOME096491_02837	GUT_GENOME171567_01858	GUT_GENOME001773_00115	GUT_GENOME117619_01957		GUT_GENOME000513_01156		GUT_GENOME140240_02767	GUT_GENOME217236_01069	GUT_GENOME147630_00879				GUT_GENOME000092_00964	GUT_GENOME187777_00139	GUT_GENOME144544_04773	GUT_GENOME251721_02584	GUT_GENOME084477_00814	GUT_GENOME001745_03486	GUT_GENOME108993_00766	GUT_GENOME281513_00739		GUT_GENOME022484_03425	GUT_GENOME057155_00290	GUT_GENOME141284_02248	GUT_GENOME014039_01018	GUT_GENOME244005_00634	GUT_GENOME121415_00273		GUT_GENOME082800_00847	GUT_GENOME096371_00498		GUT_GENOME096246_03207	GUT_GENOME211901_01297		GUT_GENOME096375_02907	GUT_GENOME103762_01436		GUT_GENOME024527_00615	GUT_GENOME119700_01229	GUT_GENOME154740_00070	GUT_GENOME000367_02284	GUT_GENOME145378_00238	GUT_GENOME246008_00548	GUT_GENOME143747_03080
GUT_GENOME096083_03053	GUT_GENOME096298_01005	GUT_GENOME143124_00428	GUT_GENOME142411_01253	GUT_GENOME144544_03999	GUT_GENOME001709_00625	GUT_GENOME116258_01580	GUT_GENOME117452_00913	GUT_GENOME241248_02878		GUT_GENOME001120_01736		GUT_GENOME000682_01675	GUT_GENOME147854_02297	GUT_GENOME032708_00167				GUT_GENOME096286_02256	GUT_GENOME003176_01004	GUT_GENOME016875_00865	GUT_GENOME102353_00457	GUT_GENOME234570_00468	GUT_GENOME274363_01667	GUT_GENOME000008_01013	GUT_GENOME134988_00090		GUT_GENOME000133_04255	GUT_GENOME000094_00372	GUT_GENOME080363_02115	GUT_GENOME111729_00310	GUT_GENOME244589_01029	GUT_GENOME078306_01862		GUT_GENOME096543_03616	GUT_GENOME127495_00272		GUT_GENOME143727_00549	GUT_GENOME254213_01617		GUT_GENOME143361_01669	GUT_GENOME241809_00449		GUT_GENOME196654_00479	GUT_GENOME078716_00629	GUT_GENOME000152_00912	GUT_GENOME096390_02173	GUT_GENOME018753_00469	GUT_GENOME096276_02024	GUT_GENOME146008_03834
GUT_GENOME141226_00634	GUT_GENOME143760_01866	GUT_GENOME200288_04736	GUT_GENOME137657_00188	GUT_GENOME190811_00622	GUT_GENOME096166_03829	GUT_GENOME132069_00981	GUT_GENOME001418_01092	GUT_GENOME025243_01222		GUT_GENOME000035_04842		GUT_GENOME133541_01192	GUT_GENOME001282_02748	GUT_GENOME239690_03947				GUT_GENOME143505_02069	GUT_GENOME144544_04773	GUT_GENOME247364_00626	GUT_GENOME140299_01053	GUT_GENOME246864_00507	GUT_GENOME159493_01138	GUT_GENOME126719_00438	GUT_GENOME239268_00900		GUT_GENOME022392_02007	GUT_GENOME000220_01155	GUT_GENOME212497_01376	GUT_GENOME042029_00709	GUT_GENOME153233_01522	GUT_GENOME025243_01222		GUT_GENOME062339_00010	GUT_GENOME233275_01549		GUT_GENOME000057_01716	GUT_GENOME143519_00852		GUT_GENOME145982_02128	GUT_GENOME122227_00783		GUT_GENOME256155_00142	GUT_GENOME142485_01113	GUT_GENOME157191_01081	GUT_GENOME226003_00527	GUT_GENOME026750_01372	GUT_GENOME096276_01189	GUT_GENOME139147_01739
GUT_GENOME000518_03471	GUT_GENOME000564_00773	GUT_GENOME006314_01084	GUT_GENOME000231_01699	GUT_GENOME147524_02624	GUT_GENOME239747_02155	GUT_GENOME096292_01108	GUT_GENOME285301_01489	GUT_GENOME143421_02505		GUT_GENOME096080_01552		GUT_GENOME231299_01656	GUT_GENOME020741_01984	GUT_GENOME147630_00729				GUT_GENOME000187_00838	GUT_GENOME143484_03555	GUT_GENOME232849_01488	GUT_GENOME102353_01930	GUT_GENOME013046_01500	GUT_GENOME234570_00468	GUT_GENOME113322_01175	GUT_GENOME001282_00763		GUT_GENOME094660_01302	GUT_GENOME032415_01115	GUT_GENOME038289_00551	GUT_GENOME000559_05078	GUT_GENOME000131_01050	GUT_GENOME000931_00259		GUT_GENOME005404_01028	GUT_GENOME139388_02240		GUT_GENOME145983_01418	GUT_GENOME238207_01410		GUT_GENOME147131_00176	GUT_GENOME207869_01738		GUT_GENOME167061_00402	GUT_GENOME052918_00876	GUT_GENOME095967_01395	GUT_GENOME284285_00402	GUT_GENOME257014_00198	GUT_GENOME147678_02399	GUT_GENOME000232_01091
GUT_GENOME247230_00104	GUT_GENOME155972_00431	GUT_GENOME191311_01350	GUT_GENOME000518_03849	GUT_GENOME137688_00941	GUT_GENOME007693_00617	GUT_GENOME001255_03995	GUT_GENOME207866_01684	GUT_GENOME001773_00115		GUT_GENOME152999_01162		GUT_GENOME101636_00512	GUT_GENOME145695_02865	GUT_GENOME164334_01769				GUT_GENOME000269_02757	GUT_GENOME143131_00402	GUT_GENOME229667_00162	GUT_GENOME096080_02181	GUT_GENOME187777_01055	GUT_GENOME001255_01662	GUT_GENOME001003_03683	GUT_GENOME109512_01729		GUT_GENOME024079_02174	GUT_GENOME096525_04042	GUT_GENOME096530_02081	GUT_GENOME268227_01125	GUT_GENOME000662_00214	GUT_GENOME142688_00030		GUT_GENOME247095_03323	GUT_GENOME222413_01551		GUT_GENOME001417_00011	GUT_GENOME096298_01079		GUT_GENOME194902_01972	GUT_GENOME194757_00898		GUT_GENOME255792_00567	GUT_GENOME033290_01329	GUT_GENOME147678_02154	GUT_GENOME145985_01530	GUT_GENOME239212_00772	GUT_GENOME247791_01945	GUT_GENOME128042_01172
GUT_GENOME095971_01285	GUT_GENOME191311_01350	GUT_GENOME243082_02831	GUT_GENOME139307_01560	GUT_GENOME246927_01479	GUT_GENOME097684_00946	GUT_GENOME010023_01759	GUT_GENOME011202_00524	GUT_GENOME142688_00030		GUT_GENOME000122_00804		GUT_GENOME251721_03797	GUT_GENOME001282_01637	GUT_GENOME244253_01189				GUT_GENOME026702_02054	GUT_GENOME171567_03827	GUT_GENOME096559_04626	GUT_GENOME000187_02307	GUT_GENOME199120_00323	GUT_GENOME017739_04006	GUT_GENOME095979_00140	GUT_GENOME133541_01673		GUT_GENOME000187_00705	GUT_GENOME017525_00115	GUT_GENOME140786_02499	GUT_GENOME085305_02188	GUT_GENOME121415_00273	GUT_GENOME261541_00172		GUT_GENOME143752_00404	GUT_GENOME222009_00893		GUT_GENOME233517_01090	GUT_GENOME067425_00365		GUT_GENOME140826_02778	GUT_GENOME110846_00439		GUT_GENOME096375_01612	GUT_GENOME142588_02478	GUT_GENOME157951_00312	GUT_GENOME158868_01817	GUT_GENOME009602_01382	GUT_GENOME230476_01524	GUT_GENOME258957_00874
	GUT_GENOME140808_01331	GUT_GENOME257704_02080	GUT_GENOME009249_01867	GUT_GENOME146003_01973	GUT_GENOME006135_01608	GUT_GENOME143726_01578	GUT_GENOME024836_01378	GUT_GENOME001418_01092		GUT_GENOME000285_02058		GUT_GENOME143484_02505	GUT_GENOME148095_00175	GUT_GENOME237867_00608				GUT_GENOME001120_01567	GUT_GENOME156224_01436	GUT_GENOME171567_03827	GUT_GENOME095971_01939	GUT_GENOME229830_03292	GUT_GENOME233285_01119	GUT_GENOME096294_00142	GUT_GENOME163607_00130		GUT_GENOME145983_02152	GUT_GENOME090571_00563	GUT_GENOME096465_01065	GUT_GENOME220495_01300	GUT_GENOME117154_00093	GUT_GENOME112985_00410		GUT_GENOME151605_00453	GUT_GENOME182432_00268		GUT_GENOME212260_01960	GUT_GENOME145698_00883		GUT_GENOME081328_00175	GUT_GENOME103882_02666		GUT_GENOME232404_01871	GUT_GENOME234802_01095	GUT_GENOME000295_00327	GUT_GENOME096391_01756	GUT_GENOME207228_01774	GUT_GENOME139147_00064	GUT_GENOME230476_01714
	GUT_GENOME244012_01131	GUT_GENOME143383_00303	GUT_GENOME096178_00958	GUT_GENOME095995_00899	GUT_GENOME096541_00918	GUT_GENOME172443_02516	GUT_GENOME266139_01357	GUT_GENOME116636_00647		GUT_GENOME088644_02095		GUT_GENOME001297_01837	GUT_GENOME029780_00910	GUT_GENOME096075_01682				GUT_GENOME144544_04773	GUT_GENOME171356_01284	GUT_GENOME000136_00639	GUT_GENOME143505_03036	GUT_GENOME071857_00550	GUT_GENOME071857_00550	GUT_GENOME143484_03765	GUT_GENOME122359_00103		GUT_GENOME022484_02066	GUT_GENOME143749_03623	GUT_GENOME194547_00952	GUT_GENOME141226_01733	GUT_GENOME120040_01421	GUT_GENOME065762_01219		GUT_GENOME207512_00674	GUT_GENOME235214_00905		GUT_GENOME247095_00864	GUT_GENOME098961_00736		GUT_GENOME000980_04550	GUT_GENOME147523_03210		GUT_GENOME001261_02126	GUT_GENOME000327_03024	GUT_GENOME220495_00402	GUT_GENOME143724_00295	GUT_GENOME237524_00969	GUT_GENOME230476_01399	GUT_GENOME082811_01085
	GUT_GENOME247095_01849	GUT_GENOME231806_03138	GUT_GENOME096286_01035	GUT_GENOME237529_02060	GUT_GENOME153241_01890	GUT_GENOME276700_00734	GUT_GENOME024514_01651	GUT_GENOME285301_01489		GUT_GENOME000035_02971		GUT_GENOME112856_01986	GUT_GENOME098042_02918	GUT_GENOME143727_01573				GUT_GENOME147678_02621	GUT_GENOME089625_01118	GUT_GENOME171356_01284	GUT_GENOME000152_02693	GUT_GENOME255999_02016	GUT_GENOME199120_00323	GUT_GENOME118228_00716	GUT_GENOME109102_00920		GUT_GENOME254659_00324	GUT_GENOME066938_00413	GUT_GENOME143191_01431	GUT_GENOME096298_04569	GUT_GENOME276930_01008	GUT_GENOME081475_00921		GUT_GENOME096538_02440	GUT_GENOME096270_03539		GUT_GENOME147598_02758	GUT_GENOME143747_02572		GUT_GENOME171567_02940	GUT_GENOME052918_00594		GUT_GENOME025619_01188	GUT_GENOME095982_03232	GUT_GENOME155439_00006	GUT_GENOME142391_02171	GUT_GENOME281896_00359	GUT_GENOME095941_01662	GUT_GENOME096276_02114
	GUT_GENOME097845_00785	GUT_GENOME242264_02115	GUT_GENOME246461_01084	GUT_GENOME096025_00107	GUT_GENOME004694_01557	GUT_GENOME018156_01423	GUT_GENOME205174_00961	GUT_GENOME200288_01315		GUT_GENOME100290_00052		GUT_GENOME250527_02429	GUT_GENOME156895_01111	GUT_GENOME233265_01716				GUT_GENOME097987_01866	GUT_GENOME001677_00121	GUT_GENOME244383_01028	GUT_GENOME239662_00972	GUT_GENOME001115_01941	GUT_GENOME229830_03292		GUT_GENOME255347_00121		GUT_GENOME001401_02753	GUT_GENOME000260_02457	GUT_GENOME058829_01435	GUT_GENOME147525_04192	GUT_GENOME036500_00169	GUT_GENOME079230_00978		GUT_GENOME143746_01845	GUT_GENOME229392_01119		GUT_GENOME143746_00221	GUT_GENOME207869_04055		GUT_GENOME140236_01230			GUT_GENOME100441_00273	GUT_GENOME232220_01507	GUT_GENOME014039_00376	GUT_GENOME009762_01509	GUT_GENOME141145_01408	GUT_GENOME195667_01874	GUT_GENOME239280_01922
	GUT_GENOME207259_01702	GUT_GENOME143746_01234	GUT_GENOME142411_01936	GUT_GENOME236879_00870	GUT_GENOME001135_02192	GUT_GENOME140240_04232	GUT_GENOME253273_00339	GUT_GENOME010791_01907		GUT_GENOME236889_02099		GUT_GENOME140330_01527	GUT_GENOME143727_01573	GUT_GENOME000202_01404				GUT_GENOME143131_00402	GUT_GENOME103766_03575	GUT_GENOME116934_01039	GUT_GENOME139132_00911	GUT_GENOME275347_00282	GUT_GENOME139458_00835		GUT_GENOME237841_00806		GUT_GENOME140330_02542	GUT_GENOME285906_00251	GUT_GENOME120040_00129	GUT_GENOME011515_01795	GUT_GENOME000625_03813	GUT_GENOME270304_00441		GUT_GENOME171567_00324	GUT_GENOME093120_01468		GUT_GENOME096298_01079	GUT_GENOME096269_01062		GUT_GENOME001147_02049			GUT_GENOME000219_02167	GUT_GENOME181651_00587	GUT_GENOME139147_01171	GUT_GENOME231247_02068	GUT_GENOME258411_01372	GUT_GENOME128042_00875	GUT_GENOME096293_00020
	GUT_GENOME156122_00893	GUT_GENOME000483_03802	GUT_GENOME209802_01903	GUT_GENOME276949_01920	GUT_GENOME137346_01339	GUT_GENOME143760_00436	GUT_GENOME096569_01045	GUT_GENOME207866_01684		GUT_GENOME096203_03012		GUT_GENOME001488_00729	GUT_GENOME079379_01525	GUT_GENOME096532_00524				GUT_GENOME010448_00831	GUT_GENOME177056_00356	GUT_GENOME096372_04270	GUT_GENOME000192_02083	GUT_GENOME096415_03792	GUT_GENOME255999_02016		GUT_GENOME119153_00206		GUT_GENOME096222_00171	GUT_GENOME175577_00232	GUT_GENOME242915_00700	GUT_GENOME239684_02229	GUT_GENOME117452_00913	GUT_GENOME239799_01297		GUT_GENOME171356_01056	GUT_GENOME143709_03340		GUT_GENOME141809_02313	GUT_GENOME017737_02662		GUT_GENOME098791_01565			GUT_GENOME026702_01070	GUT_GENOME111314_00142	GUT_GENOME239280_00147	GUT_GENOME147131_00540	GUT_GENOME107146_02073	GUT_GENOME096276_02019	GUT_GENOME286625_01031
	GUT_GENOME155913_01655	GUT_GENOME096494_00523	GUT_GENOME261579_02594	GUT_GENOME092065_01112	GUT_GENOME103705_03872	GUT_GENOME140076_03776	GUT_GENOME102353_03175	GUT_GENOME266139_01357		GUT_GENOME001120_01715		GUT_GENOME275692_02575	GUT_GENOME029877_01301	GUT_GENOME111543_00754				GUT_GENOME251721_01674	GUT_GENOME212260_00813	GUT_GENOME103766_03575	GUT_GENOME156244_01239	GUT_GENOME268486_01009	GUT_GENOME001115_01941		GUT_GENOME254659_01327		GUT_GENOME001003_00624	GUT_GENOME145695_01652	GUT_GENOME283137_02259	GUT_GENOME212287_01099	GUT_GENOME207955_02273	GUT_GENOME018685_00800		GUT_GENOME211264_02834	GUT_GENOME254213_02239		GUT_GENOME145698_00883	GUT_GENOME146003_02199		GUT_GENOME103863_03053			GUT_GENOME261541_01986	GUT_GENOME000767_02746		GUT_GENOME239084_00746	GUT_GENOME243413_00115	GUT_GENOME230476_00929	GUT_GENOME220495_01540
	GUT_GENOME096170_00201	GUT_GENOME244012_01131	GUT_GENOME047905_01117	GUT_GENOME000963_01238	GUT_GENOME096445_02678	GUT_GENOME095971_01651	GUT_GENOME285797_00928	GUT_GENOME205174_00961		GUT_GENOME000513_01141		GUT_GENOME239662_02520	GUT_GENOME242920_01162	GUT_GENOME000205_00551				GUT_GENOME040420_02107	GUT_GENOME164213_00090	GUT_GENOME277093_01317	GUT_GENOME140074_02000	GUT_GENOME243303_00214	GUT_GENOME123310_01567		GUT_GENOME007566_00941		GUT_GENOME140299_01355	GUT_GENOME139744_01471	GUT_GENOME096532_02487	GUT_GENOME141436_00240	GUT_GENOME131073_01204	GUT_GENOME158781_00161		GUT_GENOME143502_02361	GUT_GENOME095973_02462		GUT_GENOME000483_01753	GUT_GENOME146009_03211		GUT_GENOME231806_00995			GUT_GENOME096573_01134	GUT_GENOME285108_00370		GUT_GENOME139743_00199	GUT_GENOME272223_00450	GUT_GENOME042029_00101	GUT_GENOME157276_01572
	GUT_GENOME079379_01320	GUT_GENOME269003_00403	GUT_GENOME096286_02551	GUT_GENOME285134_01822	GUT_GENOME000612_02570	GUT_GENOME001635_02544	GUT_GENOME276106_02149	GUT_GENOME180041_01698		GUT_GENOME231299_02586		GUT_GENOME239662_00476	GUT_GENOME115597_01163	GUT_GENOME000563_00825				GUT_GENOME132202_01259	GUT_GENOME000035_04822	GUT_GENOME207745_02033	GUT_GENOME239725_02259	GUT_GENOME191958_02420	GUT_GENOME239690_05554		GUT_GENOME134382_01933		GUT_GENOME119528_00444	GUT_GENOME020571_01658	GUT_GENOME140270_01470	GUT_GENOME000563_04346	GUT_GENOME166968_01113	GUT_GENOME096283_02242		GUT_GENOME024543_02227	GUT_GENOME001023_00794		GUT_GENOME143752_01010	GUT_GENOME093753_00576		GUT_GENOME143726_01290			GUT_GENOME034178_02252	GUT_GENOME254518_00579		GUT_GENOME211901_00476	GUT_GENOME255755_00556	GUT_GENOME268486_01550	GUT_GENOME275636_00839
	GUT_GENOME143712_01690	GUT_GENOME156122_00893	GUT_GENOME000269_01641	GUT_GENOME143760_01802	GUT_GENOME190811_00622	GUT_GENOME096298_03217	GUT_GENOME115419_01339	GUT_GENOME096569_01045		GUT_GENOME161306_00682		GUT_GENOME231299_00448	GUT_GENOME001297_01837	GUT_GENOME105347_01335				GUT_GENOME225915_01141	GUT_GENOME109102_00891	GUT_GENOME212260_00813	GUT_GENOME171597_00445	GUT_GENOME000655_00057	GUT_GENOME232404_00355		GUT_GENOME005654_01724		GUT_GENOME251627_01904	GUT_GENOME143346_01737	GUT_GENOME208036_03200	GUT_GENOME145698_04817	GUT_GENOME007807_02021	GUT_GENOME169805_00265		GUT_GENOME232032_02583	GUT_GENOME113153_00591		GUT_GENOME096543_02944	GUT_GENOME026466_00532		GUT_GENOME143502_03225			GUT_GENOME108259_01747	GUT_GENOME241248_00752		GUT_GENOME096248_00434	GUT_GENOME145698_03613	GUT_GENOME095941_01046	GUT_GENOME017205_00321
	GUT_GENOME176758_01045	GUT_GENOME232008_01763	GUT_GENOME283627_01641	GUT_GENOME140314_01780	GUT_GENOME142415_02609	GUT_GENOME133541_02921	GUT_GENOME023798_00108	GUT_GENOME001416_01647		GUT_GENOME121220_01984		GUT_GENOME101082_03197	GUT_GENOME000563_00825	GUT_GENOME096176_01446				GUT_GENOME143211_00634	GUT_GENOME000578_00963	GUT_GENOME164213_00090	GUT_GENOME096203_04660	GUT_GENOME001752_01206	GUT_GENOME096415_03792		GUT_GENOME199128_00830		GUT_GENOME243814_03070	GUT_GENOME215855_00722	GUT_GENOME000031_01796	GUT_GENOME143724_00971	GUT_GENOME172942_00316	GUT_GENOME001602_01401		GUT_GENOME237779_01449	GUT_GENOME276106_00500		GUT_GENOME143751_00851	GUT_GENOME000047_03046		GUT_GENOME232032_04390			GUT_GENOME065655_00782	GUT_GENOME246110_00232		GUT_GENOME232472_00513	GUT_GENOME031419_02104	GUT_GENOME143188_01442	GUT_GENOME154740_01114
	GUT_GENOME079379_01392	GUT_GENOME161262_01248	GUT_GENOME143197_01189	GUT_GENOME143740_00314	GUT_GENOME147524_02624	GUT_GENOME103751_03913	GUT_GENOME194081_00478	GUT_GENOME102353_03175		GUT_GENOME068585_02399		GUT_GENOME108259_02228	GUT_GENOME131073_01320	GUT_GENOME277515_00046				GUT_GENOME096200_02937	GUT_GENOME143232_01295	GUT_GENOME096425_00842	GUT_GENOME102353_00086	GUT_GENOME001778_01877	GUT_GENOME134977_01447		GUT_GENOME000655_02341		GUT_GENOME001773_00949	GUT_GENOME197982_01556	GUT_GENOME099111_00664	GUT_GENOME095021_01602	GUT_GENOME270304_00441	GUT_GENOME143127_03847		GUT_GENOME001417_02062	GUT_GENOME259135_00702		GUT_GENOME143747_02572	GUT_GENOME142031_02358		GUT_GENOME145378_01443			GUT_GENOME001372_01203	GUT_GENOME000106_01038		GUT_GENOME207259_01236	GUT_GENOME130636_00787	GUT_GENOME096170_01652	GUT_GENOME194902_00686
	GUT_GENOME146010_02642	GUT_GENOME141303_02245	GUT_GENOME140826_02109	GUT_GENOME103856_01882	GUT_GENOME147168_00597	GUT_GENOME276542_00739	GUT_GENOME236239_00737	GUT_GENOME285797_00928		GUT_GENOME143131_00331		GUT_GENOME253356_01016	GUT_GENOME282385_01599	GUT_GENOME001778_02907				GUT_GENOME000682_02677	GUT_GENOME143522_01179	GUT_GENOME116258_01861	GUT_GENOME275692_01827	GUT_GENOME249684_00163	GUT_GENOME268486_01009		GUT_GENOME237838_00190		GUT_GENOME110741_02005	GUT_GENOME267277_00533	GUT_GENOME096384_03621	GUT_GENOME123926_00311	GUT_GENOME239799_01297	GUT_GENOME096295_02621		GUT_GENOME080199_02041	GUT_GENOME009256_00926		GUT_GENOME239663_02805	GUT_GENOME140246_01548		GUT_GENOME096170_00356			GUT_GENOME004333_00826	GUT_GENOME096572_01499		GUT_GENOME000203_01704	GUT_GENOME143361_00304	GUT_GENOME096170_01154	GUT_GENOME036853_00916
	GUT_GENOME155428_01829	GUT_GENOME096170_00201	GUT_GENOME143232_02891	GUT_GENOME000980_03247	GUT_GENOME096459_02145	GUT_GENOME239725_02005	GUT_GENOME236885_00442	GUT_GENOME115419_01339				GUT_GENOME145378_01928	GUT_GENOME000944_01789	GUT_GENOME141041_03923				GUT_GENOME000578_00993	GUT_GENOME097684_03225	GUT_GENOME284003_01654	GUT_GENOME143505_00431	GUT_GENOME001418_02673	GUT_GENOME009249_00909		GUT_GENOME152364_00589		GUT_GENOME123926_00431	GUT_GENOME005565_00338	GUT_GENOME259524_00551	GUT_GENOME140074_01536	GUT_GENOME147524_04805	GUT_GENOME001401_00963		GUT_GENOME146008_03316	GUT_GENOME243413_01102		GUT_GENOME143760_02051	GUT_GENOME095296_02149		GUT_GENOME177056_00886			GUT_GENOME016361_02373	GUT_GENOME096372_04465		GUT_GENOME007188_00177	GUT_GENOME265296_00796	GUT_GENOME095941_00074	GUT_GENOME249850_00222
	GUT_GENOME095296_01091	GUT_GENOME145582_00207	GUT_GENOME001208_01923	GUT_GENOME244035_00223	GUT_GENOME018782_00665	GUT_GENOME102353_03175	GUT_GENOME147854_00835	GUT_GENOME023798_00108				GUT_GENOME001341_01334	GUT_GENOME001778_02907	GUT_GENOME157330_01614				GUT_GENOME096191_01670	GUT_GENOME147854_02748	GUT_GENOME037519_00035	GUT_GENOME102353_00083	GUT_GENOME096240_02157	GUT_GENOME256537_01038		GUT_GENOME205964_01852		GUT_GENOME000578_00263	GUT_GENOME120108_01164	GUT_GENOME112859_00249	GUT_GENOME140826_00070	GUT_GENOME142587_04727	GUT_GENOME083453_00772		GUT_GENOME145695_00630	GUT_GENOME237520_00993		GUT_GENOME000563_00165	GUT_GENOME141436_02653		GUT_GENOME143346_00863			GUT_GENOME250710_00436	GUT_GENOME097737_01197		GUT_GENOME001029_01213	GUT_GENOME001805_01760	GUT_GENOME195758_01150	GUT_GENOME125418_00864
	GUT_GENOME038289_00316	GUT_GENOME232032_02152	GUT_GENOME001401_02656	GUT_GENOME075528_05031	GUT_GENOME146003_01973	GUT_GENOME159485_00026	GUT_GENOME066597_00611	GUT_GENOME263827_00483				GUT_GENOME143131_03819	GUT_GENOME239662_02520	GUT_GENOME108259_02228				GUT_GENOME000295_03501	GUT_GENOME276949_00004	GUT_GENOME080362_01476	GUT_GENOME253356_00670	GUT_GENOME229574_00603	GUT_GENOME191958_02420		GUT_GENOME096473_05003		GUT_GENOME047905_01279	GUT_GENOME103721_00328	GUT_GENOME141441_02609	GUT_GENOME094321_01724	GUT_GENOME001295_01265	GUT_GENOME042029_00442		GUT_GENOME000559_00047	GUT_GENOME130774_01782		GUT_GENOME000676_01070	GUT_GENOME242337_01820		GUT_GENOME057686_01952			GUT_GENOME139627_01920	GUT_GENOME199331_01485		GUT_GENOME000113_00323	GUT_GENOME245766_00983	GUT_GENOME210225_01066	GUT_GENOME016626_01523
	GUT_GENOME143527_04126	GUT_GENOME096482_01655	GUT_GENOME253356_02304	GUT_GENOME143746_00190	GUT_GENOME095995_00899	GUT_GENOME253356_01041	GUT_GENOME153760_00254	GUT_GENOME194081_00478				GUT_GENOME096185_00231	GUT_GENOME001341_01334	GUT_GENOME111912_01803				GUT_GENOME096201_01535	GUT_GENOME000231_02847	GUT_GENOME124317_02067	GUT_GENOME000092_02270	GUT_GENOME152364_00977	GUT_GENOME239663_02488		GUT_GENOME143197_00384		GUT_GENOME096083_01937	GUT_GENOME143505_04100	GUT_GENOME248619_00453	GUT_GENOME001115_00339	GUT_GENOME011202_00524	GUT_GENOME092107_00324		GUT_GENOME096415_00865	GUT_GENOME280504_01838		GUT_GENOME103751_00214	GUT_GENOME143632_00663		GUT_GENOME231670_01313			GUT_GENOME262313_01006	GUT_GENOME000024_00879		GUT_GENOME145378_00238	GUT_GENOME095597_01210	GUT_GENOME247421_01130	GUT_GENOME248086_01128
	GUT_GENOME005404_01677	GUT_GENOME096269_00031	GUT_GENOME242840_02434	GUT_GENOME236892_01166	GUT_GENOME141441_02824	GUT_GENOME096083_02809	GUT_GENOME058339_00509	GUT_GENOME000575_02852				GUT_GENOME000092_00964	GUT_GENOME108259_02228	GUT_GENOME001573_00844				GUT_GENOME000035_04822	GUT_GENOME250439_02313	GUT_GENOME108259_01592	GUT_GENOME139132_01598	GUT_GENOME236879_00141	GUT_GENOME008172_00273		GUT_GENOME258721_01616		GUT_GENOME114249_00047	GUT_GENOME157398_01313	GUT_GENOME242958_00701	GUT_GENOME080199_02808	GUT_GENOME139200_00778	GUT_GENOME103864_01817		GUT_GENOME095995_02665	GUT_GENOME057155_00021		GUT_GENOME000595_01004	GUT_GENOME000594_01662		GUT_GENOME143408_02450			GUT_GENOME001004_00492	GUT_GENOME272874_02003		GUT_GENOME096374_00950	GUT_GENOME096381_02506	GUT_GENOME096489_00139	GUT_GENOME156244_00761
	GUT_GENOME232032_01500	GUT_GENOME143712_01690	GUT_GENOME283627_01227	GUT_GENOME096557_03935	GUT_GENOME172958_03108	GUT_GENOME096294_01226	GUT_GENOME057155_01594	GUT_GENOME236239_00737				GUT_GENOME096063_00772	GUT_GENOME096185_00231	GUT_GENOME024743_00564				GUT_GENOME130350_01997	GUT_GENOME001120_04903	GUT_GENOME142576_00124	GUT_GENOME253356_00519	GUT_GENOME096203_04933	GUT_GENOME113180_02105		GUT_GENOME149381_02030		GUT_GENOME084706_00489	GUT_GENOME124650_01644	GUT_GENOME140361_04564	GUT_GENOME233517_01757	GUT_GENOME024836_01378	GUT_GENOME000133_04388		GUT_GENOME001023_00794	GUT_GENOME006135_00483		GUT_GENOME246455_01991	GUT_GENOME093120_01832		GUT_GENOME095941_02317			GUT_GENOME244134_00891	GUT_GENOME196654_00479		GUT_GENOME231559_04139	GUT_GENOME243582_01119	GUT_GENOME154740_02088	GUT_GENOME018964_00097
	GUT_GENOME143723_01085	GUT_GENOME096217_01905	GUT_GENOME000266_02983	GUT_GENOME004694_00348	GUT_GENOME005886_02401	GUT_GENOME253287_03091	GUT_GENOME096491_02757	GUT_GENOME212738_01135				GUT_GENOME258721_01321	GUT_GENOME127500_00846	GUT_GENOME141436_01502				GUT_GENOME000420_02528	GUT_GENOME253356_01128	GUT_GENOME112856_01555	GUT_GENOME140078_00007	GUT_GENOME027831_00636	GUT_GENOME001177_00199		GUT_GENOME212961_00921		GUT_GENOME140808_00841	GUT_GENOME145698_02064	GUT_GENOME140299_01355	GUT_GENOME140808_03268	GUT_GENOME186054_00372	GUT_GENOME212287_00497		GUT_GENOME176758_01617	GUT_GENOME246789_01462		GUT_GENOME000245_02125	GUT_GENOME096435_03075		GUT_GENOME143726_02024			GUT_GENOME000545_02679	GUT_GENOME142492_00595		GUT_GENOME026217_02050	GUT_GENOME122231_00242	GUT_GENOME096276_02104	GUT_GENOME249850_01744
	GUT_GENOME239799_00810	GUT_GENOME231559_02510	GUT_GENOME158142_00501	GUT_GENOME001440_01254	GUT_GENOME095978_01294	GUT_GENOME096573_01646	GUT_GENOME242337_01324	GUT_GENOME236885_00442				GUT_GENOME096286_02256	GUT_GENOME001139_01326	GUT_GENOME000578_02138				GUT_GENOME143232_01295	GUT_GENOME095336_00414	GUT_GENOME272874_02386	GUT_GENOME123416_00125	GUT_GENOME275347_02104	GUT_GENOME249684_00163		GUT_GENOME113217_00862		GUT_GENOME142411_01660	GUT_GENOME170612_00827	GUT_GENOME256521_00340	GUT_GENOME001417_04004	GUT_GENOME096067_03234	GUT_GENOME096293_01272		GUT_GENOME232013_01790	GUT_GENOME139906_01117		GUT_GENOME000047_03046	GUT_GENOME011266_00433		GUT_GENOME142457_00980			GUT_GENOME270878_00402	GUT_GENOME167061_00402		GUT_GENOME097942_00696	GUT_GENOME258969_01002	GUT_GENOME275636_01164	GUT_GENOME275636_01192
	GUT_GENOME001401_02671	GUT_GENOME079379_01392	GUT_GENOME143202_00322	GUT_GENOME000231_01699	GUT_GENOME096025_00107	GUT_GENOME147854_00835	GUT_GENOME285832_02065	GUT_GENOME000046_01780				GUT_GENOME143505_02069	GUT_GENOME155674_01701	GUT_GENOME147523_03181				GUT_GENOME096203_01502	GUT_GENOME009698_01350	GUT_GENOME140808_00350	GUT_GENOME256353_00217	GUT_GENOME096366_01620	GUT_GENOME284947_01019		GUT_GENOME149380_01989		GUT_GENOME139147_02116	GUT_GENOME240703_00089	GUT_GENOME140270_02142	GUT_GENOME144544_03516	GUT_GENOME000941_01256	GUT_GENOME000575_02852		GUT_GENOME231247_00014	GUT_GENOME000612_01752		GUT_GENOME065434_00479	GUT_GENOME095995_03342		GUT_GENOME261061_00232			GUT_GENOME155674_01862	GUT_GENOME256155_00142		GUT_GENOME000017_00579	GUT_GENOME140601_03920	GUT_GENOME139132_00688	GUT_GENOME019103_00918
	GUT_GENOME232192_04099	GUT_GENOME096244_04473	GUT_GENOME143232_02993	GUT_GENOME094675_00987	GUT_GENOME236879_00870	GUT_GENOME096185_00575	GUT_GENOME022908_01078	GUT_GENOME143726_04032				GUT_GENOME000187_00838	GUT_GENOME141436_01502	GUT_GENOME000812_01813				GUT_GENOME114436_02262	GUT_GENOME000554_02680	GUT_GENOME140826_01174	GUT_GENOME096083_01790	GUT_GENOME151978_00224	GUT_GENOME257235_01710		GUT_GENOME218838_02493		GUT_GENOME144544_00843	GUT_GENOME128641_00834	GUT_GENOME101256_01924	GUT_GENOME145695_04463	GUT_GENOME255913_02360	GUT_GENOME099523_00347		GUT_GENOME139860_00506	GUT_GENOME200873_02044		GUT_GENOME142031_02358	GUT_GENOME000483_01625		GUT_GENOME086272_00875			GUT_GENOME000963_03086	GUT_GENOME033115_01558		GUT_GENOME133452_00056	GUT_GENOME247220_00643	GUT_GENOME140074_01731	GUT_GENOME143188_00040
	GUT_GENOME286704_00099	GUT_GENOME242337_01674	GUT_GENOME047905_01030	GUT_GENOME244035_00835	GUT_GENOME153272_01750	GUT_GENOME247584_00239	GUT_GENOME219438_03315	GUT_GENOME147854_00835				GUT_GENOME001120_03466	GUT_GENOME024743_00564	GUT_GENOME256176_00506				GUT_GENOME116258_01861	GUT_GENOME262105_00063	GUT_GENOME245427_01047	GUT_GENOME143505_03035	GUT_GENOME143727_03752	GUT_GENOME161955_01312		GUT_GENOME205174_01319		GUT_GENOME142411_00779	GUT_GENOME103710_01715	GUT_GENOME143118_00877	GUT_GENOME143190_01480	GUT_GENOME001401_00963	GUT_GENOME120564_00366		GUT_GENOME057155_00021			GUT_GENOME143723_01137	GUT_GENOME177471_04083		GUT_GENOME145981_02064			GUT_GENOME140337_00488	GUT_GENOME096499_00067		GUT_GENOME265580_00281	GUT_GENOME252369_00277	GUT_GENOME096489_00133	GUT_GENOME127781_01368
	GUT_GENOME000196_00274	GUT_GENOME086272_01004	GUT_GENOME113322_01221	GUT_GENOME138767_02750	GUT_GENOME285134_01822	GUT_GENOME019335_02096	GUT_GENOME265296_00658	GUT_GENOME153760_00254				GUT_GENOME096366_01664	GUT_GENOME096063_03703	GUT_GENOME143746_03539				GUT_GENOME147854_02748	GUT_GENOME143232_04096	GUT_GENOME207750_01888	GUT_GENOME143190_00601	GUT_GENOME000004_00756	GUT_GENOME002738_00821		GUT_GENOME205656_01436		GUT_GENOME140808_01441	GUT_GENOME140074_01923	GUT_GENOME096179_02212	GUT_GENOME000595_04740	GUT_GENOME147131_03695	GUT_GENOME001831_00051		GUT_GENOME138467_00364			GUT_GENOME147525_01984	GUT_GENOME029304_01320		GUT_GENOME143746_02883			GUT_GENOME232915_01877	GUT_GENOME255792_00567		GUT_GENOME096572_00259	GUT_GENOME001297_02547	GUT_GENOME096170_00523	GUT_GENOME248086_01273
	GUT_GENOME231920_01590	GUT_GENOME231299_02116	GUT_GENOME099111_00056	GUT_GENOME092842_01006	GUT_GENOME000963_01238	GUT_GENOME000122_01583	GUT_GENOME108259_01506	GUT_GENOME058339_00509				GUT_GENOME000269_02757	GUT_GENOME187777_00139	GUT_GENOME246096_00068				GUT_GENOME140240_01546	GUT_GENOME207512_00402	GUT_GENOME095995_04394	GUT_GENOME000192_00478	GUT_GENOME212645_02178	GUT_GENOME100613_01761		GUT_GENOME140245_03270		GUT_GENOME277334_00827	GUT_GENOME263866_02051	GUT_GENOME233284_01405	GUT_GENOME143752_04308	GUT_GENOME143127_03847	GUT_GENOME116069_00435		GUT_GENOME147598_03489			GUT_GENOME171356_00583	GUT_GENOME113005_00458		GUT_GENOME000595_00626			GUT_GENOME142576_01008	GUT_GENOME096375_01612		GUT_GENOME009178_00918	GUT_GENOME098156_01406	GUT_GENOME032708_00040	GUT_GENOME143188_02072
	GUT_GENOME095490_00731	GUT_GENOME155428_01829	GUT_GENOME143211_01366	GUT_GENOME000057_03108	GUT_GENOME261579_00238	GUT_GENOME126719_01178	GUT_GENOME139859_01313	GUT_GENOME000046_01872				GUT_GENOME000008_00745	GUT_GENOME019095_02184	GUT_GENOME000106_00395				GUT_GENOME000231_02847	GUT_GENOME001418_03007	GUT_GENOME141315_03355	GUT_GENOME157191_00414	GUT_GENOME110705_00782	GUT_GENOME096240_02157		GUT_GENOME237844_01126		GUT_GENOME217674_00210	GUT_GENOME242920_00039	GUT_GENOME127797_00438	GUT_GENOME036763_00091	GUT_GENOME097827_02309	GUT_GENOME026742_02027		GUT_GENOME140826_02717			GUT_GENOME145695_04526	GUT_GENOME231453_04430		GUT_GENOME156849_02355			GUT_GENOME176020_00631	GUT_GENOME109114_02479		GUT_GENOME000104_00178	GUT_GENOME134384_01082	GUT_GENOME096489_01424	GUT_GENOME249850_01743
	GUT_GENOME014491_00997	GUT_GENOME096390_05024	GUT_GENOME140345_00392	GUT_GENOME000872_03697	GUT_GENOME237529_00724	GUT_GENOME000554_02957	GUT_GENOME113426_00233	GUT_GENOME285832_02065				GUT_GENOME218891_01777	GUT_GENOME065434_00656	GUT_GENOME243514_01226				GUT_GENOME239728_02535	GUT_GENOME001745_00029	GUT_GENOME143718_00338	GUT_GENOME209802_00495	GUT_GENOME236892_00027	GUT_GENOME040420_02179		GUT_GENOME056716_00088		GUT_GENOME001341_00678	GUT_GENOME232472_00422	GUT_GENOME140365_04087	GUT_GENOME152519_03156	GUT_GENOME096295_02621	GUT_GENOME098909_01199		GUT_GENOME207341_00927			GUT_GENOME147524_02562	GUT_GENOME096527_01402		GUT_GENOME145582_02826			GUT_GENOME103893_03128	GUT_GENOME001261_02126		GUT_GENOME096192_00479	GUT_GENOME000166_01503	GUT_GENOME095967_01250	GUT_GENOME239280_01113
	GUT_GENOME000563_00089	GUT_GENOME143383_01363	GUT_GENOME001208_01520	GUT_GENOME188395_01801	GUT_GENOME276949_01920	GUT_GENOME143711_01324	GUT_GENOME283137_01521	GUT_GENOME124317_02072				GUT_GENOME001488_03314	GUT_GENOME148641_00488	GUT_GENOME225869_00804				GUT_GENOME268227_01883	GUT_GENOME264227_01390	GUT_GENOME000030_01279	GUT_GENOME000285_02262	GUT_GENOME276091_00481	GUT_GENOME133372_00193		GUT_GENOME010023_01594		GUT_GENOME132205_01297	GUT_GENOME215898_01212	GUT_GENOME268486_00346	GUT_GENOME157463_02274	GUT_GENOME220495_00408	GUT_GENOME000308_01805		GUT_GENOME156122_00882			GUT_GENOME140826_02123	GUT_GENOME141809_02554		GUT_GENOME103751_03495			GUT_GENOME092814_01464	GUT_GENOME025619_01188		GUT_GENOME000020_01889	GUT_GENOME275829_01895		GUT_GENOME247103_01926
	GUT_GENOME143189_00420	GUT_GENOME095939_02472	GUT_GENOME007446_02145	GUT_GENOME131689_01784	GUT_GENOME214864_01642	GUT_GENOME000518_00812	GUT_GENOME011144_01108	GUT_GENOME001805_02289				GUT_GENOME140299_00629	GUT_GENOME143746_03539	GUT_GENOME143709_02901				GUT_GENOME145985_01122	GUT_GENOME140808_00350	GUT_GENOME170735_00424	GUT_GENOME000152_01734	GUT_GENOME165741_00775	GUT_GENOME001177_00361		GUT_GENOME000008_02348		GUT_GENOME231300_00166	GUT_GENOME032757_00379	GUT_GENOME098909_00423	GUT_GENOME079379_01214	GUT_GENOME250439_00749	GUT_GENOME254562_00315		GUT_GENOME007693_01721			GUT_GENOME143749_00600	GUT_GENOME143740_00622		GUT_GENOME142612_02772			GUT_GENOME143131_03820	GUT_GENOME236877_00071		GUT_GENOME112667_00240	GUT_GENOME096099_03295		GUT_GENOME164403_00911
	GUT_GENOME103557_00208	GUT_GENOME000057_01666	GUT_GENOME125250_00268	GUT_GENOME242840_02560	GUT_GENOME153023_01186	GUT_GENOME108259_01506	GUT_GENOME110557_01460	GUT_GENOME108259_01506				GUT_GENOME026702_02054	GUT_GENOME000189_00853	GUT_GENOME000067_01801				GUT_GENOME009249_01514	GUT_GENOME140826_01174	GUT_GENOME231453_00459	GUT_GENOME157191_01546	GUT_GENOME001255_03422	GUT_GENOME049240_00962		GUT_GENOME100343_01645		GUT_GENOME000196_02516	GUT_GENOME137833_01006	GUT_GENOME076944_00794	GUT_GENOME215793_01191	GUT_GENOME001261_00017	GUT_GENOME117585_00633		GUT_GENOME194726_00276			GUT_GENOME095996_03372	GUT_GENOME127116_01108		GUT_GENOME143112_00208			GUT_GENOME227559_02378	GUT_GENOME100441_00273		GUT_GENOME096424_01584	GUT_GENOME127505_00013		GUT_GENOME143727_00904
	GUT_GENOME001023_02045	GUT_GENOME000483_04612	GUT_GENOME000980_00797	GUT_GENOME000479_01841	GUT_GENOME000980_03247	GUT_GENOME096366_00578	GUT_GENOME096075_00431	GUT_GENOME113426_00233				GUT_GENOME142411_00715	GUT_GENOME155926_00997	GUT_GENOME001039_00660				GUT_GENOME001120_04903	GUT_GENOME140076_03972	GUT_GENOME006298_00555	GUT_GENOME000092_02083	GUT_GENOME000725_02269	GUT_GENOME103705_01002		GUT_GENOME112859_00596		GUT_GENOME073482_01414	GUT_GENOME256155_00186	GUT_GENOME281441_00937	GUT_GENOME154740_01272	GUT_GENOME042029_00442	GUT_GENOME096435_01760		GUT_GENOME247084_02691			GUT_GENOME145378_03886	GUT_GENOME143124_05507		GUT_GENOME082811_01224			GUT_GENOME044283_00753	GUT_GENOME000219_02167		GUT_GENOME247084_00494	GUT_GENOME096236_02326		GUT_GENOME239280_01496
	GUT_GENOME108785_00805	GUT_GENOME141425_00210	GUT_GENOME155439_00938	GUT_GENOME000327_01207	GUT_GENOME194757_03043	GUT_GENOME143484_02930	GUT_GENOME285322_01279	GUT_GENOME000111_00141				GUT_GENOME126719_01093	GUT_GENOME010023_01955	GUT_GENOME103762_01493				GUT_GENOME229830_00294	GUT_GENOME010933_01190	GUT_GENOME145981_02731	GUT_GENOME155439_01777	GUT_GENOME231257_00588	GUT_GENOME027831_00636		GUT_GENOME001255_02588		GUT_GENOME020571_01658	GUT_GENOME143726_00359	GUT_GENOME170405_00927	GUT_GENOME122359_00443	GUT_GENOME276106_02149	GUT_GENOME002826_00685		GUT_GENOME212260_00150			GUT_GENOME231559_04574	GUT_GENOME243585_01436		GUT_GENOME103705_01319			GUT_GENOME041780_01184	GUT_GENOME096505_03516		GUT_GENOME009602_01382	GUT_GENOME255258_02101		GUT_GENOME225259_01560
	GUT_GENOME207411_00546	GUT_GENOME243592_01072	GUT_GENOME000152_01973	GUT_GENOME174135_01369	GUT_GENOME103856_01882	GUT_GENOME251721_03025	GUT_GENOME148641_00981	GUT_GENOME011144_01108				GUT_GENOME000192_00623	GUT_GENOME272267_00811	GUT_GENOME006314_02186				GUT_GENOME253356_01128	GUT_GENOME022484_04179	GUT_GENOME000109_01620	GUT_GENOME152519_02669	GUT_GENOME071810_01060	GUT_GENOME275347_02104		GUT_GENOME237837_00895		GUT_GENOME000554_02231	GUT_GENOME218730_00332	GUT_GENOME000625_03900	GUT_GENOME261541_02137	GUT_GENOME143380_03598	GUT_GENOME278449_01247		GUT_GENOME000594_04111			GUT_GENOME080199_01491	GUT_GENOME147796_01925		GUT_GENOME141436_03274			GUT_GENOME233268_01650	GUT_GENOME096573_01134		GUT_GENOME207228_01774	GUT_GENOME141089_02310		GUT_GENOME210225_01147
	GUT_GENOME177056_00289	GUT_GENOME231685_01768	GUT_GENOME256353_00602	GUT_GENOME275136_01312	GUT_GENOME142396_01486	GUT_GENOME243824_00484	GUT_GENOME157213_02294	GUT_GENOME265296_01387				GUT_GENOME229830_01657	GUT_GENOME182311_00548	GUT_GENOME092528_02176				GUT_GENOME206071_02206	GUT_GENOME066597_01526	GUT_GENOME033875_00302	GUT_GENOME143232_00600	GUT_GENOME032966_00910	GUT_GENOME154595_00163		GUT_GENOME140330_00136		GUT_GENOME014039_01083	GUT_GENOME282720_00020	GUT_GENOME243082_06752	GUT_GENOME000152_02396	GUT_GENOME225869_00788	GUT_GENOME147630_00346		GUT_GENOME148095_01640			GUT_GENOME143724_03488	GUT_GENOME147598_02758		GUT_GENOME140352_01229			GUT_GENOME000259_00555	GUT_GENOME025308_00380		GUT_GENOME147598_00695	GUT_GENOME260844_00064		GUT_GENOME284185_01691
	GUT_GENOME140329_01173	GUT_GENOME143527_02129	GUT_GENOME127139_00127	GUT_GENOME045630_00241	GUT_GENOME000236_01932	GUT_GENOME126659_01070	GUT_GENOME113915_00565	GUT_GENOME110557_01460				GUT_GENOME096489_01689	GUT_GENOME229830_01657	GUT_GENOME182311_00548				GUT_GENOME096294_04785	GUT_GENOME095995_04394	GUT_GENOME250982_00330	GUT_GENOME096174_00496	GUT_GENOME000122_02128	GUT_GENOME151978_00224		GUT_GENOME040420_01693		GUT_GENOME022484_02454	GUT_GENOME145582_02439	GUT_GENOME025243_00686	GUT_GENOME000518_00812	GUT_GENOME001854_00799	GUT_GENOME001636_02404		GUT_GENOME231453_02121			GUT_GENOME231247_04542	GUT_GENOME096373_01736		GUT_GENOME230476_01735			GUT_GENOME244966_00755	GUT_GENOME143709_02816		GUT_GENOME075582_01468	GUT_GENOME103741_01452		GUT_GENOME044204_01595
	GUT_GENOME143727_00452	GUT_GENOME095943_00419	GUT_GENOME001401_02754	GUT_GENOME001636_01912	GUT_GENOME001417_03750	GUT_GENOME000192_02314	GUT_GENOME029301_02046	GUT_GENOME237421_00824				GUT_GENOME001120_01567	GUT_GENOME258758_01654	GUT_GENOME171648_04017				GUT_GENOME000554_02680	GUT_GENOME140078_01254	GUT_GENOME000634_03489	GUT_GENOME000035_04858	GUT_GENOME096206_00386	GUT_GENOME143727_03752		GUT_GENOME175554_00864		GUT_GENOME122482_00915	GUT_GENOME180088_01625	GUT_GENOME000220_01155	GUT_GENOME000655_04023	GUT_GENOME000133_04388	GUT_GENOME235154_01132		GUT_GENOME177056_00644			GUT_GENOME144544_00705	GUT_GENOME193238_00312		GUT_GENOME103856_01722			GUT_GENOME039567_01364	GUT_GENOME000587_01192		GUT_GENOME096414_00309	GUT_GENOME113664_00227		GUT_GENOME260051_01610
	GUT_GENOME244286_02206	GUT_GENOME232082_03277	GUT_GENOME276476_01129	GUT_GENOME251011_00177	GUT_GENOME103710_03340	GUT_GENOME000008_00854	GUT_GENOME208016_01682	GUT_GENOME096075_00431				GUT_GENOME144544_04773	GUT_GENOME003176_01004	GUT_GENOME096393_00541				GUT_GENOME147612_02772	GUT_GENOME000035_04101	GUT_GENOME000031_03112	GUT_GENOME111543_02728	GUT_GENOME140826_03614	GUT_GENOME000004_00756		GUT_GENOME239662_02252		GUT_GENOME102353_00767	GUT_GENOME270087_00761	GUT_GENOME000094_00372	GUT_GENOME211264_02941	GUT_GENOME001870_02252	GUT_GENOME023591_01648		GUT_GENOME143751_00088			GUT_GENOME260369_01503	GUT_GENOME141809_02313		GUT_GENOME089175_00201			GUT_GENOME096291_01414	GUT_GENOME095230_00040		GUT_GENOME237524_00969	GUT_GENOME096533_03519		GUT_GENOME128042_01815
	GUT_GENOME149381_02273	GUT_GENOME096390_04478	GUT_GENOME145983_01437	GUT_GENOME096025_01840	GUT_GENOME142458_03004	GUT_GENOME000187_00177	GUT_GENOME173058_01450	GUT_GENOME159508_01532				GUT_GENOME147678_02621	GUT_GENOME144544_04773	GUT_GENOME226919_00530				GUT_GENOME108259_01592	GUT_GENOME244012_00332	GUT_GENOME096532_01277	GUT_GENOME147598_00279	GUT_GENOME101966_00890	GUT_GENOME017739_02825		GUT_GENOME096063_00895		GUT_GENOME020577_02669	GUT_GENOME141436_04777	GUT_GENOME121269_01517	GUT_GENOME268486_00163	GUT_GENOME212287_00497	GUT_GENOME018456_00217		GUT_GENOME000563_01728				GUT_GENOME095246_01332		GUT_GENOME103882_02795			GUT_GENOME001769_00304	GUT_GENOME206071_00057		GUT_GENOME231920_03927	GUT_GENOME096297_00019		GUT_GENOME097019_00775
	GUT_GENOME001120_02892	GUT_GENOME149497_02249	GUT_GENOME001659_00353	GUT_GENOME096297_01094	GUT_GENOME169952_00572	GUT_GENOME171356_04387	GUT_GENOME281513_00765	GUT_GENOME172942_00930				GUT_GENOME097987_01866	GUT_GENOME171536_00231	GUT_GENOME171536_00231				GUT_GENOME145983_02457	GUT_GENOME000513_02104	GUT_GENOME145378_03478	GUT_GENOME000655_03725	GUT_GENOME140078_00007	GUT_GENOME212645_02178		GUT_GENOME207745_00510		GUT_GENOME260001_01597	GUT_GENOME188419_00284	GUT_GENOME102441_02315	GUT_GENOME143502_00754	GUT_GENOME283626_01628	GUT_GENOME240840_02338		GUT_GENOME000483_00913				GUT_GENOME096543_02944		GUT_GENOME286625_01107			GUT_GENOME001653_00323	GUT_GENOME065655_00782		GUT_GENOME284695_00151	GUT_GENOME113153_01052		GUT_GENOME145698_02961
	GUT_GENOME147525_01898	GUT_GENOME244330_01253	GUT_GENOME098045_01967	GUT_GENOME143726_01299	GUT_GENOME256424_01147	GUT_GENOME096063_01653	GUT_GENOME283282_01415	GUT_GENOME148641_00981				GUT_GENOME258721_02970	GUT_GENOME001274_00713	GUT_GENOME144544_04773				GUT_GENOME096080_00649	GUT_GENOME207341_00829	GUT_GENOME141089_01573	GUT_GENOME144544_03749	GUT_GENOME226927_00420	GUT_GENOME017990_00460		GUT_GENOME142525_01281		GUT_GENOME106027_01448	GUT_GENOME040261_01353	GUT_GENOME000031_03707	GUT_GENOME143751_03943	GUT_GENOME230891_00852	GUT_GENOME284292_00821		GUT_GENOME000057_01767				GUT_GENOME143751_00851		GUT_GENOME141809_02588			GUT_GENOME275347_01230	GUT_GENOME001372_01203		GUT_GENOME246551_01710	GUT_GENOME039567_00123		GUT_GENOME248086_01454
	GUT_GENOME096495_01994	GUT_GENOME096200_02809	GUT_GENOME140299_02450	GUT_GENOME001147_02918	GUT_GENOME244968_01495	GUT_GENOME000563_03245	GUT_GENOME282385_01591	GUT_GENOME252875_01052				GUT_GENOME096083_00823	GUT_GENOME001709_00182	GUT_GENOME001355_01249				GUT_GENOME140076_04797	GUT_GENOME001677_00124	GUT_GENOME143711_00809	GUT_GENOME000559_03929	GUT_GENOME100613_00801	GUT_GENOME110705_00782		GUT_GENOME237879_02147		GUT_GENOME000483_02871	GUT_GENOME125418_01232	GUT_GENOME032415_01115	GUT_GENOME141047_02491	GUT_GENOME175131_01471	GUT_GENOME000055_00422		GUT_GENOME264873_01852				GUT_GENOME141425_04382		GUT_GENOME096067_00615			GUT_GENOME018575_00264	GUT_GENOME004333_00826		GUT_GENOME231431_01077	GUT_GENOME176733_00074		GUT_GENOME001354_01803
	GUT_GENOME095971_01285	GUT_GENOME212260_01992	GUT_GENOME111947_01267	GUT_GENOME176465_02732	GUT_GENOME075528_05031	GUT_GENOME000231_02687	GUT_GENOME000852_03255	GUT_GENOME157213_02294				GUT_GENOME143131_00402	GUT_GENOME156886_01509	GUT_GENOME103721_00308				GUT_GENOME000192_01849	GUT_GENOME248256_01184	GUT_GENOME201393_00877	GUT_GENOME095967_02874	GUT_GENOME123416_00125	GUT_GENOME000614_01243		GUT_GENOME231299_00913		GUT_GENOME096701_00217	GUT_GENOME155275_01808	GUT_GENOME096525_04042	GUT_GENOME247791_01024	GUT_GENOME139147_01179	GUT_GENOME124450_00153		GUT_GENOME096384_02785				GUT_GENOME140104_01002		GUT_GENOME000245_01951			GUT_GENOME113153_01820	GUT_GENOME283386_00860		GUT_GENOME001139_01338	GUT_GENOME088395_01218		GUT_GENOME246008_01703
	GUT_GENOME155913_01759	GUT_GENOME096542_00236	GUT_GENOME147612_03125	GUT_GENOME095352_01154	GUT_GENOME236892_01166	GUT_GENOME001745_01795	GUT_GENOME001189_02207	GUT_GENOME029301_02046				GUT_GENOME111543_01559	GUT_GENOME109880_02182	GUT_GENOME016875_00865				GUT_GENOME115272_01504	GUT_GENOME256155_00634	GUT_GENOME225784_00106	GUT_GENOME143505_04575	GUT_GENOME001770_01558	GUT_GENOME236892_00027		GUT_GENOME113868_01213		GUT_GENOME000237_00554	GUT_GENOME000483_00218	GUT_GENOME090571_00563	GUT_GENOME082800_01418	GUT_GENOME103847_01226	GUT_GENOME131073_00877		GUT_GENOME000131_02718				GUT_GENOME138467_02300		GUT_GENOME141089_03295			GUT_GENOME261979_00208	GUT_GENOME250710_00436		GUT_GENOME281896_00359	GUT_GENOME044483_02444		GUT_GENOME017455_00269
	GUT_GENOME000001_01922	GUT_GENOME019330_01187	GUT_GENOME143484_02959	GUT_GENOME084477_00171	GUT_GENOME159348_02216	GUT_GENOME239662_01087	GUT_GENOME245896_00784	GUT_GENOME208016_01682				GUT_GENOME036763_02234	GUT_GENOME207884_01353	GUT_GENOME247364_00626				GUT_GENOME140808_00350	GUT_GENOME000122_03278	GUT_GENOME096270_04241	GUT_GENOME147854_03247	GUT_GENOME117619_00582	GUT_GENOME000604_04809		GUT_GENOME252875_00680		GUT_GENOME170504_01649	GUT_GENOME092886_00314	GUT_GENOME088395_00141	GUT_GENOME123416_01314	GUT_GENOME001135_05384	GUT_GENOME140053_00644		GUT_GENOME079379_01275				GUT_GENOME239663_02805		GUT_GENOME096276_01607			GUT_GENOME118228_01804	GUT_GENOME175069_01699		GUT_GENOME084706_01443	GUT_GENOME009723_00519		GUT_GENOME096293_03412
	GUT_GENOME000967_00248	GUT_GENOME232220_04962	GUT_GENOME143211_01733	GUT_GENOME000595_04166	GUT_GENOME243378_00239	GUT_GENOME022392_01188	GUT_GENOME096063_01653	GUT_GENOME248633_00728				GUT_GENOME111543_00350	GUT_GENOME143484_03555	GUT_GENOME232849_01488				GUT_GENOME140826_01174	GUT_GENOME231453_00459	GUT_GENOME096168_00114	GUT_GENOME126719_01024	GUT_GENOME201325_00141	GUT_GENOME276091_00481		GUT_GENOME140283_01616		GUT_GENOME239728_00892	GUT_GENOME196563_00163	GUT_GENOME231806_02223	GUT_GENOME000092_00469	GUT_GENOME094660_00112	GUT_GENOME238301_02519		GUT_GENOME143749_03089				GUT_GENOME143752_01010		GUT_GENOME082800_01445			GUT_GENOME023366_00480	GUT_GENOME139627_01920		GUT_GENOME096431_00256	GUT_GENOME122322_00713		GUT_GENOME124450_00535
	GUT_GENOME140314_00596	GUT_GENOME142588_00250	GUT_GENOME143505_04097	GUT_GENOME095993_02378	GUT_GENOME000598_02550	GUT_GENOME231453_04092	GUT_GENOME277093_01658	GUT_GENOME173058_01450				GUT_GENOME251721_01674	GUT_GENOME143131_00402	GUT_GENOME139634_01307				GUT_GENOME010933_01190	GUT_GENOME108993_02746	GUT_GENOME231247_00876	GUT_GENOME126659_00654	GUT_GENOME140076_02595	GUT_GENOME165741_00775		GUT_GENOME206546_00734		GUT_GENOME009523_00479	GUT_GENOME096168_01776	GUT_GENOME200288_06115	GUT_GENOME243824_00484	GUT_GENOME066597_00611	GUT_GENOME009750_01148		GUT_GENOME143723_03740				GUT_GENOME000047_00177		GUT_GENOME033647_01838			GUT_GENOME172958_01143	GUT_GENOME056112_00408		GUT_GENOME025881_00836	GUT_GENOME011023_01856		GUT_GENOME086272_00830
	GUT_GENOME145983_01527	GUT_GENOME143519_03721	GUT_GENOME001636_02038	GUT_GENOME017828_01559	GUT_GENOME004694_00348	GUT_GENOME001120_01169	GUT_GENOME001213_01382	GUT_GENOME143718_00671				GUT_GENOME000655_00059	GUT_GENOME096083_00823	GUT_GENOME143502_03803				GUT_GENOME019103_00627	GUT_GENOME006298_00555	GUT_GENOME096393_02529	GUT_GENOME000483_04699	GUT_GENOME018576_01843	GUT_GENOME110959_01174		GUT_GENOME246927_01316		GUT_GENOME001255_00066	GUT_GENOME143751_04012	GUT_GENOME000260_02457	GUT_GENOME062339_00415	GUT_GENOME239257_00031	GUT_GENOME095993_00255		GUT_GENOME000595_01831				GUT_GENOME024968_01296		GUT_GENOME145698_01117			GUT_GENOME163027_01946	GUT_GENOME233269_00149		GUT_GENOME096472_00793	GUT_GENOME254699_01414		GUT_GENOME096170_00741
	GUT_GENOME230903_00750	GUT_GENOME146008_00060	GUT_GENOME145378_03901	GUT_GENOME096244_02944	GUT_GENOME001440_01254	GUT_GENOME000513_00197	GUT_GENOME075582_01065	GUT_GENOME103712_01913				GUT_GENOME147854_02482	GUT_GENOME239747_00149	GUT_GENOME277090_00508				GUT_GENOME001341_02418	GUT_GENOME000109_01620	GUT_GENOME098791_01234	GUT_GENOME000231_00323	GUT_GENOME147542_02860	GUT_GENOME000725_02269		GUT_GENOME143232_03972		GUT_GENOME129586_01525	GUT_GENOME213260_01327	GUT_GENOME285906_00251	GUT_GENOME231559_01928	GUT_GENOME098909_01199	GUT_GENOME242646_00958		GUT_GENOME065321_00089				GUT_GENOME140601_03394		GUT_GENOME143527_02680			GUT_GENOME066938_00468	GUT_GENOME262313_01006		GUT_GENOME104704_02362	GUT_GENOME000587_01864		GUT_GENOME248086_01870
	GUT_GENOME022295_00704	GUT_GENOME103868_04992	GUT_GENOME192801_02114	GUT_GENOME000963_01742	GUT_GENOME115910_00171	GUT_GENOME096256_03013	GUT_GENOME140283_00828	GUT_GENOME096063_01653				GUT_GENOME040420_02107	GUT_GENOME171567_03827	GUT_GENOME207884_01353				GUT_GENOME121215_02349	GUT_GENOME001213_00497	GUT_GENOME000711_02982	GUT_GENOME147678_01949	GUT_GENOME155679_02175	GUT_GENOME013431_00494		GUT_GENOME155164_00839		GUT_GENOME253356_01048	GUT_GENOME096670_01427	GUT_GENOME139744_01471	GUT_GENOME140078_02174	GUT_GENOME000055_01179	GUT_GENOME001056_00025		GUT_GENOME103893_02588				GUT_GENOME001417_03476		GUT_GENOME143751_00383			GUT_GENOME137702_00465	GUT_GENOME001004_00492		GUT_GENOME141145_01408	GUT_GENOME026473_00531		GUT_GENOME018115_00414
	GUT_GENOME145695_04002	GUT_GENOME242264_02266	GUT_GENOME000420_00216	GUT_GENOME208016_01314	GUT_GENOME246551_01562	GUT_GENOME001341_00998	GUT_GENOME171597_04286	GUT_GENOME236874_00757				GUT_GENOME140826_01823	GUT_GENOME111543_00350	GUT_GENOME096559_04626				GUT_GENOME096170_02025	GUT_GENOME096213_01286	GUT_GENOME095944_00377	GUT_GENOME256353_00414	GUT_GENOME096206_02739	GUT_GENOME231257_00588		GUT_GENOME249684_00973		GUT_GENOME147612_01161	GUT_GENOME000057_03116	GUT_GENOME020571_01658	GUT_GENOME247791_00178	GUT_GENOME057155_01594	GUT_GENOME237633_00816		GUT_GENOME143724_02757				GUT_GENOME257704_02374		GUT_GENOME095296_02528			GUT_GENOME001800_01730	GUT_GENOME244134_00891		GUT_GENOME258411_01372	GUT_GENOME157422_00447		GUT_GENOME275636_01870
	GUT_GENOME211264_02143	GUT_GENOME096248_02442	GUT_GENOME000192_02164	GUT_GENOME096491_01985	GUT_GENOME000231_01699	GUT_GENOME096174_03125	GUT_GENOME001120_01169	GUT_GENOME140602_00181				GUT_GENOME233517_00605	GUT_GENOME142496_02181	GUT_GENOME231397_00660				GUT_GENOME231299_01094	GUT_GENOME145378_03478	GUT_GENOME001490_00880	GUT_GENOME157463_01700	GUT_GENOME069124_00916	GUT_GENOME096206_00386		GUT_GENOME251543_01232		GUT_GENOME017944_01460	GUT_GENOME275692_01159	GUT_GENOME141763_01434	GUT_GENOME171356_04282	GUT_GENOME096491_02757	GUT_GENOME000727_02960		GUT_GENOME103751_00789				GUT_GENOME159700_01095		GUT_GENOME286625_01268			GUT_GENOME138470_02091	GUT_GENOME000545_02679		GUT_GENOME270891_00846	GUT_GENOME013099_00934		GUT_GENOME143740_03013
	GUT_GENOME159035_01200	GUT_GENOME155913_01759	GUT_GENOME140808_01261	GUT_GENOME096244_01675	GUT_GENOME211901_02215	GUT_GENOME258721_02972	GUT_GENOME237864_00493	GUT_GENOME236885_01220				GUT_GENOME253356_02220	GUT_GENOME156224_01436	GUT_GENOME246171_00199				GUT_GENOME140299_02389	GUT_GENOME143711_00809	GUT_GENOME140270_00991	GUT_GENOME096080_01589	GUT_GENOME096294_04486	GUT_GENOME071810_01060		GUT_GENOME143484_03684		GUT_GENOME147612_01574	GUT_GENOME196654_00826	GUT_GENOME095357_01508	GUT_GENOME146008_01590	GUT_GENOME143411_04021	GUT_GENOME194081_01086		GUT_GENOME155913_01415				GUT_GENOME065434_00479		GUT_GENOME142031_02447			GUT_GENOME141187_00405	GUT_GENOME270878_00402		GUT_GENOME107146_02073	GUT_GENOME000109_01122		GUT_GENOME220136_01199
	GUT_GENOME096402_02855	GUT_GENOME092528_00627	GUT_GENOME000092_00989	GUT_GENOME246551_01867	GUT_GENOME244035_00835	GUT_GENOME001488_01380	GUT_GENOME009878_00386	GUT_GENOME078983_00048				GUT_GENOME132202_01259	GUT_GENOME147854_02482	GUT_GENOME254647_01591				GUT_GENOME108993_02746	GUT_GENOME065630_01200	GUT_GENOME143747_01326	GUT_GENOME239662_01261	GUT_GENOME155679_00177	GUT_GENOME140826_03614		GUT_GENOME217674_06404		GUT_GENOME000221_00269	GUT_GENOME225784_02112	GUT_GENOME090745_01287	GUT_GENOME145983_03540	GUT_GENOME242337_01324	GUT_GENOME235244_00078		GUT_GENOME140808_01845				GUT_GENOME232192_00493		GUT_GENOME222123_00376			GUT_GENOME252977_01707	GUT_GENOME155674_01862		GUT_GENOME254905_00840	GUT_GENOME140003_00498		GUT_GENOME014039_00659
	GUT_GENOME212287_01516	GUT_GENOME140365_01613	GUT_GENOME001115_00972	GUT_GENOME239673_04259	GUT_GENOME092842_01006	GUT_GENOME217674_05863	GUT_GENOME000545_00510	GUT_GENOME236879_00650				GUT_GENOME096201_00961	GUT_GENOME247791_01627	GUT_GENOME168551_00030				GUT_GENOME095941_01002	GUT_GENOME225784_00106	GUT_GENOME181333_01655	GUT_GENOME143505_04580	GUT_GENOME014039_01198	GUT_GENOME231920_00118		GUT_GENOME159508_01143		GUT_GENOME096489_00409	GUT_GENOME231309_01196	GUT_GENOME141765_00329	GUT_GENOME239280_00694	GUT_GENOME237529_01457	GUT_GENOME284015_01630		GUT_GENOME143760_02690				GUT_GENOME096381_02541		GUT_GENOME000215_01755			GUT_GENOME103749_01152	GUT_GENOME000963_03086		GUT_GENOME243413_00115	GUT_GENOME095879_01383		GUT_GENOME210225_01066
	GUT_GENOME000047_00038	GUT_GENOME005654_01350	GUT_GENOME205656_02516	GUT_GENOME224740_00797	GUT_GENOME094675_00987	GUT_GENOME001417_01320	GUT_GENOME285291_01847	GUT_GENOME140283_00828				GUT_GENOME225915_01141	GUT_GENOME155913_00557	GUT_GENOME001364_03732				GUT_GENOME128042_00810	GUT_GENOME217674_04134	GUT_GENOME000057_01243	GUT_GENOME096246_00127	GUT_GENOME133961_00454	GUT_GENOME140078_00007		GUT_GENOME000554_02213		GUT_GENOME001023_01958	GUT_GENOME145698_01080	GUT_GENOME256536_00205	GUT_GENOME011515_00079	GUT_GENOME098569_01777	GUT_GENOME104704_01773		GUT_GENOME001295_01264				GUT_GENOME147525_01984		GUT_GENOME095995_04063			GUT_GENOME096294_00114	GUT_GENOME283286_00129		GUT_GENOME275519_00541	GUT_GENOME011797_01160		GUT_GENOME237633_00754
	GUT_GENOME231320_01611	GUT_GENOME096257_01218	GUT_GENOME074354_01075	GUT_GENOME000131_00229	GUT_GENOME000872_03697	GUT_GENOME096080_01668	GUT_GENOME280168_00053	GUT_GENOME075582_01065				GUT_GENOME143211_00634	GUT_GENOME233517_00605	GUT_GENOME000225_00256				GUT_GENOME096170_02026	GUT_GENOME284343_00012	GUT_GENOME000603_01040	GUT_GENOME253356_01092	GUT_GENOME114679_00706	GUT_GENOME101966_00890		GUT_GENOME009480_00441		GUT_GENOME001757_02855	GUT_GENOME262768_01396	GUT_GENOME141754_00543	GUT_GENOME001635_01093	GUT_GENOME022908_01078	GUT_GENOME235148_00617		GUT_GENOME142031_01685				GUT_GENOME242264_03384		GUT_GENOME000563_00802			GUT_GENOME245498_01064	GUT_GENOME140337_00488		GUT_GENOME252752_00260	GUT_GENOME279935_00303		GUT_GENOME275636_01611
	GUT_GENOME151605_01275	GUT_GENOME274864_00784	GUT_GENOME143505_00249	GUT_GENOME096179_01722	GUT_GENOME097725_00402	GUT_GENOME143746_02635	GUT_GENOME001488_01380	GUT_GENOME001120_01169				GUT_GENOME152519_02512	GUT_GENOME140272_00979	GUT_GENOME143092_01804				GUT_GENOME259135_01405	GUT_GENOME096420_01316	GUT_GENOME097942_01298	GUT_GENOME152519_02668	GUT_GENOME000122_00772	GUT_GENOME226927_00420		GUT_GENOME028802_02026		GUT_GENOME159262_00189	GUT_GENOME097711_02639	GUT_GENOME267277_00533	GUT_GENOME158068_01728	GUT_GENOME000149_02463	GUT_GENOME017394_01553		GUT_GENOME143726_03864				GUT_GENOME255273_01309		GUT_GENOME143411_02950			GUT_GENOME096020_01855	GUT_GENOME143282_03441		GUT_GENOME152049_00374	GUT_GENOME259535_00021		GUT_GENOME143188_02125
	GUT_GENOME000237_01869	GUT_GENOME111598_01914	GUT_GENOME095967_01972	GUT_GENOME276542_01602	GUT_GENOME261579_00510	GUT_GENOME246421_02932	GUT_GENOME149574_01498	GUT_GENOME237864_00493				GUT_GENOME159485_02045	GUT_GENOME151520_00166	GUT_GENOME274350_01319				GUT_GENOME000518_02572	GUT_GENOME231247_00876	GUT_GENOME103882_02222	GUT_GENOME145983_03989	GUT_GENOME069124_00406	GUT_GENOME100613_00801		GUT_GENOME155679_01770		GUT_GENOME096080_02127	GUT_GENOME218496_00610	GUT_GENOME206546_01209	GUT_GENOME142031_04698	GUT_GENOME000133_04698	GUT_GENOME239428_00052		GUT_GENOME145698_00433				GUT_GENOME140270_05137		GUT_GENOME103882_02063			GUT_GENOME076000_00524	GUT_GENOME142576_01008		GUT_GENOME207305_00758	GUT_GENOME269730_01170		GUT_GENOME000092_00179
	GUT_GENOME231599_03239	GUT_GENOME096472_00936	GUT_GENOME286887_01827	GUT_GENOME145981_01733	GUT_GENOME237882_00513	GUT_GENOME142031_04011	GUT_GENOME285659_01985	GUT_GENOME285291_01847				GUT_GENOME096200_02937	GUT_GENOME171356_01284	GUT_GENOME171567_03827				GUT_GENOME001255_03080	GUT_GENOME183079_01805	GUT_GENOME097019_00830	GUT_GENOME143724_00735	GUT_GENOME253287_00031	GUT_GENOME139879_02037		GUT_GENOME096286_00716		GUT_GENOME247455_01899	GUT_GENOME143727_00324	GUT_GENOME096567_01298	GUT_GENOME171567_01960	GUT_GENOME143408_03567	GUT_GENOME082534_00570		GUT_GENOME000149_02464				GUT_GENOME257383_00176		GUT_GENOME143127_01392			GUT_GENOME232336_01421	GUT_GENOME096178_03932		GUT_GENOME207955_02968	GUT_GENOME192985_01773		GUT_GENOME260051_01490
	GUT_GENOME001636_02639	GUT_GENOME275636_00784	GUT_GENOME142411_02115	GUT_GENOME231320_03426	GUT_GENOME232220_05624	GUT_GENOME143723_02886	GUT_GENOME088644_02285	GUT_GENOME149574_01498				GUT_GENOME253287_00673	GUT_GENOME001418_01376	GUT_GENOME118842_01492				GUT_GENOME096166_02377	GUT_GENOME094099_00958	GUT_GENOME247095_01797	GUT_GENOME247791_01931	GUT_GENOME102034_00962	GUT_GENOME285301_01738		GUT_GENOME153913_00259		GUT_GENOME096473_02538	GUT_GENOME274744_01818	GUT_GENOME235365_00345	GUT_GENOME207512_01557	GUT_GENOME265296_00658	GUT_GENOME110846_01259		GUT_GENOME212287_00748				GUT_GENOME000625_00981		GUT_GENOME001354_00462			GUT_GENOME244583_01608	GUT_GENOME244583_00140		GUT_GENOME258665_00858	GUT_GENOME000295_00327		GUT_GENOME249850_00229
	GUT_GENOME096170_00174	GUT_GENOME096189_01975	GUT_GENOME144544_00722	GUT_GENOME145698_00857	GUT_GENOME274466_00506	GUT_GENOME095991_02600	GUT_GENOME263950_00274	GUT_GENOME001488_01380				GUT_GENOME000578_00993	GUT_GENOME111729_01910	GUT_GENOME141727_02408				GUT_GENOME044204_01421	GUT_GENOME000676_01420	GUT_GENOME096269_04173	GUT_GENOME000092_01954	GUT_GENOME014555_01092	GUT_GENOME037311_00978		GUT_GENOME109620_00304		GUT_GENOME096366_00215	GUT_GENOME140076_01056	GUT_GENOME027928_00423	GUT_GENOME209802_01948	GUT_GENOME124777_00364	GUT_GENOME133538_00128		GUT_GENOME171597_02669				GUT_GENOME103705_03471		GUT_GENOME027824_00388			GUT_GENOME173857_02252	GUT_GENOME242764_03031		GUT_GENOME145698_03613	GUT_GENOME256424_00493		GUT_GENOME082811_01637
	GUT_GENOME017790_00633	GUT_GENOME032405_01247	GUT_GENOME007990_00856	GUT_GENOME263866_00016	GUT_GENOME000479_01841	GUT_GENOME041343_01204	GUT_GENOME071857_01547	GUT_GENOME235747_01283				GUT_GENOME000285_00419	GUT_GENOME089625_01118	GUT_GENOME000136_00639				GUT_GENOME000513_04040	GUT_GENOME044204_01421	GUT_GENOME036853_01297	GUT_GENOME000563_03967	GUT_GENOME188395_02661	GUT_GENOME075528_06004		GUT_GENOME248633_01178		GUT_GENOME084706_00447	GUT_GENOME237052_00840	GUT_GENOME186025_00316	GUT_GENOME143726_03932	GUT_GENOME096020_02147	GUT_GENOME061534_02175		GUT_GENOME198893_01368				GUT_GENOME095996_03372		GUT_GENOME000483_03332			GUT_GENOME159262_01267	GUT_GENOME103893_03128		GUT_GENOME247791_01030	GUT_GENOME105472_00690		GUT_GENOME032708_00040
	GUT_GENOME000094_00114	GUT_GENOME151605_01275	GUT_GENOME143197_00296	GUT_GENOME005683_02245	GUT_GENOME000327_01207	GUT_GENOME239747_02027	GUT_GENOME146010_04477	GUT_GENOME234569_01448				GUT_GENOME239662_00174	GUT_GENOME172443_02358	GUT_GENOME006956_00812				GUT_GENOME001190_00271	GUT_GENOME001490_00880	GUT_GENOME096564_02403	GUT_GENOME239725_02417	GUT_GENOME096386_01922	GUT_GENOME117619_00582		GUT_GENOME142411_02039		GUT_GENOME261541_00812	GUT_GENOME044283_00750	GUT_GENOME120108_01164	GUT_GENOME159035_01502	GUT_GENOME001636_02404	GUT_GENOME125256_00533		GUT_GENOME231320_00199				GUT_GENOME080199_01491		GUT_GENOME096424_03106			GUT_GENOME096067_01319	GUT_GENOME096530_02256		GUT_GENOME257450_00573	GUT_GENOME252961_00381		GUT_GENOME045895_00325
	GUT_GENOME000571_02006	GUT_GENOME212287_01516	GUT_GENOME000423_02333	GUT_GENOME231431_01323	GUT_GENOME001805_01374	GUT_GENOME103766_04153	GUT_GENOME063926_02239	GUT_GENOME285659_01985				GUT_GENOME096191_01670	GUT_GENOME002158_02808	GUT_GENOME140246_01842				GUT_GENOME000655_03760	GUT_GENOME143747_01326	GUT_GENOME096441_01457	GUT_GENOME143505_00209	GUT_GENOME143131_03163	GUT_GENOME000295_02173		GUT_GENOME007573_01541		GUT_GENOME252977_00415	GUT_GENOME079077_00266	GUT_GENOME103721_00328	GUT_GENOME268227_02002	GUT_GENOME141089_02312	GUT_GENOME078983_00048		GUT_GENOME231920_04193				GUT_GENOME143724_03488		GUT_GENOME000594_03000			GUT_GENOME029301_02295	GUT_GENOME140713_00589		GUT_GENOME031419_02104	GUT_GENOME236454_00063		GUT_GENOME139732_01116
	GUT_GENOME141397_00445	GUT_GENOME000337_01840	GUT_GENOME040420_00506	GUT_GENOME282385_00062	GUT_GENOME199120_00088	GUT_GENOME022484_03745	GUT_GENOME182311_02082	GUT_GENOME151520_01071				GUT_GENOME096201_01535	GUT_GENOME270687_01628	GUT_GENOME207750_02874				GUT_GENOME000192_00007	GUT_GENOME000231_03544	GUT_GENOME141334_03419	GUT_GENOME095967_01267	GUT_GENOME217586_00366	GUT_GENOME096179_00652		GUT_GENOME022484_00879		GUT_GENOME205964_02834	GUT_GENOME246321_00570	GUT_GENOME145982_00421	GUT_GENOME239280_00156	GUT_GENOME098909_01910	GUT_GENOME008139_00213		GUT_GENOME266127_00152				GUT_GENOME142578_01809		GUT_GENOME247084_02698			GUT_GENOME007858_01955	GUT_GENOME132078_02033		GUT_GENOME143361_00304	GUT_GENOME251699_00954		GUT_GENOME268486_01550
	GUT_GENOME001635_03184	GUT_GENOME045895_00309	GUT_GENOME139132_01477	GUT_GENOME103694_04921	GUT_GENOME174135_01369	GUT_GENOME149381_03041	GUT_GENOME139646_00906	GUT_GENOME041343_01204				GUT_GENOME124777_01184	GUT_GENOME082800_00689	GUT_GENOME140329_00085				GUT_GENOME095991_02860	GUT_GENOME095991_02860	GUT_GENOME001773_02012	GUT_GENOME102353_02708	GUT_GENOME243020_01262	GUT_GENOME201325_00141		GUT_GENOME097684_03109		GUT_GENOME143505_04100	GUT_GENOME147598_01410	GUT_GENOME102629_00235	GUT_GENOME259822_01510	GUT_GENOME139859_01313	GUT_GENOME078005_00968		GUT_GENOME143711_00426				GUT_GENOME014138_01377		GUT_GENOME096166_02668			GUT_GENOME095707_00897	GUT_GENOME157265_00973		GUT_GENOME130636_00787	GUT_GENOME279986_00517		GUT_GENOME234088_01724
	GUT_GENOME146008_00023	GUT_GENOME000031_03146	GUT_GENOME007446_01102	GUT_GENOME091175_00340	GUT_GENOME285134_01374	GUT_GENOME000221_03642	GUT_GENOME095993_01162	GUT_GENOME063926_02239				GUT_GENOME253287_03665	GUT_GENOME143726_01033	GUT_GENOME258629_01435				GUT_GENOME219438_03655	GUT_GENOME038289_01350	GUT_GENOME238401_01979	GUT_GENOME171356_04073	GUT_GENOME249268_02799	GUT_GENOME140076_02595		GUT_GENOME143202_00029		GUT_GENOME010448_00735	GUT_GENOME045630_00343	GUT_GENOME147152_02273	GUT_GENOME143760_04578	GUT_GENOME211264_02941	GUT_GENOME018858_01063		GUT_GENOME231257_00061				GUT_GENOME103868_02644		GUT_GENOME103766_02579			GUT_GENOME024527_00467	GUT_GENOME044179_00963		GUT_GENOME127139_01776	GUT_GENOME239280_00147		GUT_GENOME082811_00191
	GUT_GENOME147524_02637	GUT_GENOME140352_01898	GUT_GENOME157951_01420	GUT_GENOME206946_01650	GUT_GENOME045630_00241	GUT_GENOME143505_04078	GUT_GENOME119153_00415	GUT_GENOME238202_00619				GUT_GENOME001239_00100	GUT_GENOME103766_03575	GUT_GENOME171356_01284				GUT_GENOME143211_01387	GUT_GENOME000057_01243	GUT_GENOME096512_01526	GUT_GENOME143505_01464	GUT_GENOME097987_01972	GUT_GENOME147542_02860		GUT_GENOME212983_01268		GUT_GENOME041343_01331	GUT_GENOME111543_02087	GUT_GENOME096271_00218	GUT_GENOME263189_02819	GUT_GENOME218106_00648	GUT_GENOME266127_00494		GUT_GENOME145378_01377				GUT_GENOME144544_00705		GUT_GENOME001417_00544			GUT_GENOME059153_01192	GUT_GENOME092814_01464		GUT_GENOME000128_00578	GUT_GENOME096723_00122		GUT_GENOME096170_01069
	GUT_GENOME212260_03848	GUT_GENOME000030_01871	GUT_GENOME143202_00182	GUT_GENOME220728_00315	GUT_GENOME258258_00604	GUT_GENOME147525_03594	GUT_GENOME111729_00649	GUT_GENOME096536_01846				GUT_GENOME000035_04822	GUT_GENOME177056_00356	GUT_GENOME078716_00753				GUT_GENOME278353_01095	GUT_GENOME133541_00422	GUT_GENOME018819_00389	GUT_GENOME147678_02648	GUT_GENOME239268_01187	GUT_GENOME018576_01843		GUT_GENOME115272_01024		GUT_GENOME225807_01730	GUT_GENOME268227_01740	GUT_GENOME213244_01071	GUT_GENOME000057_03407	GUT_GENOME164255_02543	GUT_GENOME019619_00805		GUT_GENOME143740_02090				GUT_GENOME096508_00797		GUT_GENOME144544_00917			GUT_GENOME150307_01114	GUT_GENOME143131_03820		GUT_GENOME147777_01590	GUT_GENOME278232_00300		GUT_GENOME018964_01156
	GUT_GENOME238522_01491	GUT_GENOME207678_00180	GUT_GENOME155713_00833	GUT_GENOME000604_03817	GUT_GENOME249369_00241	GUT_GENOME150050_00434	GUT_GENOME002158_00995	GUT_GENOME111729_00649				GUT_GENOME118228_01293	GUT_GENOME096256_02957	GUT_GENOME157213_01434				GUT_GENOME000578_01934	GUT_GENOME212317_00804	GUT_GENOME241809_02165	GUT_GENOME014039_01126	GUT_GENOME142497_02451	GUT_GENOME011512_00051		GUT_GENOME111729_00885		GUT_GENOME036763_00111	GUT_GENOME117154_00555	GUT_GENOME143505_04100	GUT_GENOME198893_00034	GUT_GENOME096473_03828	GUT_GENOME251332_00309		GUT_GENOME155972_00475				GUT_GENOME000029_02461		GUT_GENOME158821_00175			GUT_GENOME159567_00477	GUT_GENOME227559_02378		GUT_GENOME001805_01760	GUT_GENOME096271_00195		GUT_GENOME096170_01309
	GUT_GENOME193403_00498	GUT_GENOME192857_02005		GUT_GENOME101636_01596	GUT_GENOME275136_01312	GUT_GENOME017944_00999	GUT_GENOME149381_03041	GUT_GENOME096196_02309				GUT_GENOME001488_02757	GUT_GENOME264037_01863	GUT_GENOME096374_02833				GUT_GENOME096276_00151	GUT_GENOME001636_00586	GUT_GENOME096183_01206	GUT_GENOME096203_03330	GUT_GENOME254915_00907	GUT_GENOME155679_02175		GUT_GENOME239268_00700		GUT_GENOME000221_01365	GUT_GENOME140826_03760	GUT_GENOME255956_00357	GUT_GENOME147678_02146	GUT_GENOME057686_01276	GUT_GENOME092065_00190		GUT_GENOME141436_03940				GUT_GENOME096372_05423		GUT_GENOME000559_00579			GUT_GENOME007573_00525	GUT_GENOME254154_00084		GUT_GENOME147152_02941	GUT_GENOME142388_01319		GUT_GENOME143752_00245
	GUT_GENOME207341_00872	GUT_GENOME274372_01355		GUT_GENOME112384_00428	GUT_GENOME251011_00177	GUT_GENOME000035_00874	GUT_GENOME174135_00443	GUT_GENOME254915_01445				GUT_GENOME096178_03891	GUT_GENOME212260_00813	GUT_GENOME111729_01910				GUT_GENOME133541_00422	GUT_GENOME229830_02863	GUT_GENOME142591_00133	GUT_GENOME096083_02424	GUT_GENOME022484_00139	GUT_GENOME096206_02739		GUT_GENOME108993_00846		GUT_GENOME014888_01171	GUT_GENOME140314_00831	GUT_GENOME049452_00208	GUT_GENOME005404_00519	GUT_GENOME115359_01832	GUT_GENOME009144_00770		GUT_GENOME038289_01371				GUT_GENOME141436_02776		GUT_GENOME000232_01941			GUT_GENOME143156_01183	GUT_GENOME044283_00753		GUT_GENOME175326_00621	GUT_GENOME096557_02655		GUT_GENOME014039_00445
	GUT_GENOME096543_03053	GUT_GENOME213063_02483		GUT_GENOME141371_03423	GUT_GENOME096025_01840	GUT_GENOME000682_00344	GUT_GENOME010337_02524	GUT_GENOME002158_00995				GUT_GENOME000420_02528	GUT_GENOME164213_00090	GUT_GENOME016248_02495				GUT_GENOME118228_02604	GUT_GENOME140240_03114	GUT_GENOME096246_02315	GUT_GENOME069124_00693	GUT_GENOME142596_00731	GUT_GENOME024905_01525		GUT_GENOME113023_01131		GUT_GENOME151978_01947	GUT_GENOME143096_00013	GUT_GENOME007050_02025	GUT_GENOME155972_01343	GUT_GENOME242337_01497	GUT_GENOME270891_00531		GUT_GENOME141809_03136				GUT_GENOME000587_01216		GUT_GENOME142597_02170			GUT_GENOME256509_01007	GUT_GENOME041780_01184		GUT_GENOME127781_01136	GUT_GENOME140270_00364		GUT_GENOME018964_00613
	GUT_GENOME174135_01113	GUT_GENOME001635_03184		GUT_GENOME174465_00861	GUT_GENOME096297_01094	GUT_GENOME096556_02469	GUT_GENOME014888_02086	GUT_GENOME149381_03041				GUT_GENOME130350_01997	GUT_GENOME140245_01873	GUT_GENOME142592_03973				GUT_GENOME115272_00306	GUT_GENOME147612_02939	GUT_GENOME152364_02256	GUT_GENOME253356_00410	GUT_GENOME125517_00479	GUT_GENOME143495_02941		GUT_GENOME140330_02082		GUT_GENOME126719_01996	GUT_GENOME271377_01185	GUT_GENOME124650_01644	GUT_GENOME258721_01271	GUT_GENOME001598_03006	GUT_GENOME254740_00223		GUT_GENOME144544_01625				GUT_GENOME143502_03113		GUT_GENOME275636_00993			GUT_GENOME014491_00281	GUT_GENOME218243_01983		GUT_GENOME236862_00605	GUT_GENOME000996_01144		GUT_GENOME128042_01441
	GUT_GENOME155926_01373	GUT_GENOME242764_01754		GUT_GENOME140278_01313	GUT_GENOME243082_04706	GUT_GENOME152999_00645	GUT_GENOME143505_04078	GUT_GENOME174135_00443				GUT_GENOME143232_01295	GUT_GENOME000035_04822	GUT_GENOME116934_01039				GUT_GENOME230476_01069	GUT_GENOME000189_02420	GUT_GENOME231320_00682	GUT_GENOME147525_03968	GUT_GENOME095967_02874	GUT_GENOME252307_00758		GUT_GENOME152519_01837		GUT_GENOME001757_00472	GUT_GENOME143156_00981	GUT_GENOME263852_00151	GUT_GENOME095967_02400	GUT_GENOME285322_01279	GUT_GENOME234569_01448		GUT_GENOME143727_04600				GUT_GENOME006135_01551		GUT_GENOME145698_02994			GUT_GENOME279986_01123	GUT_GENOME243880_00085		GUT_GENOME096542_02778	GUT_GENOME107512_01178		GUT_GENOME019103_02012
	GUT_GENOME259797_00132	GUT_GENOME141334_00988		GUT_GENOME096442_00546	GUT_GENOME001147_02918	GUT_GENOME074354_01411	GUT_GENOME001471_00933	GUT_GENOME049084_00312				GUT_GENOME096203_01502	GUT_GENOME073885_01845	GUT_GENOME270687_01628				GUT_GENOME126719_01184	GUT_GENOME147612_01348	GUT_GENOME096036_01817	GUT_GENOME172443_00199	GUT_GENOME065370_01299	GUT_GENOME155679_00177		GUT_GENOME111543_00077		GUT_GENOME172443_01108	GUT_GENOME000768_00491	GUT_GENOME026837_00724	GUT_GENOME147678_01330	GUT_GENOME000046_01866	GUT_GENOME067057_00823						GUT_GENOME096495_04554		GUT_GENOME045895_00375			GUT_GENOME219276_00994	GUT_GENOME000259_00555		GUT_GENOME111947_00633	GUT_GENOME213244_02026		GUT_GENOME036853_00691
	GUT_GENOME096083_03053	GUT_GENOME226031_01144		GUT_GENOME131073_01096	GUT_GENOME095707_01063	GUT_GENOME095979_03776	GUT_GENOME275347_01722	GUT_GENOME010337_02524				GUT_GENOME121220_01557	GUT_GENOME171683_00897	GUT_GENOME244383_01028				GUT_GENOME147612_02939	GUT_GENOME141059_02131	GUT_GENOME103882_01269	GUT_GENOME143727_02843	GUT_GENOME105301_03888	GUT_GENOME125804_01520		GUT_GENOME102109_00267		GUT_GENOME229574_02207	GUT_GENOME148443_01135	GUT_GENOME037519_01370	GUT_GENOME251721_02009	GUT_GENOME113915_00565	GUT_GENOME239772_00439						GUT_GENOME096465_01734		GUT_GENOME275636_01681			GUT_GENOME282985_00338	GUT_GENOME095246_01546		GUT_GENOME192801_01714	GUT_GENOME117373_00243		GUT_GENOME249850_00027
	GUT_GENOME231453_01862	GUT_GENOME193403_00498		GUT_GENOME117166_00602	GUT_GENOME096491_00855	GUT_GENOME275692_00410	GUT_GENOME094937_00050	GUT_GENOME142610_03086				GUT_GENOME000285_00357	GUT_GENOME109102_00891	GUT_GENOME096372_04270				GUT_GENOME219438_01952	GUT_GENOME227151_01121	GUT_GENOME231250_03329	GUT_GENOME143712_01855	GUT_GENOME240528_00320	GUT_GENOME098568_03621		GUT_GENOME284447_01164		GUT_GENOME096083_02639	GUT_GENOME196923_01515	GUT_GENOME254436_00697	GUT_GENOME259135_01522	GUT_GENOME097783_01202	GUT_GENOME027596_00507						GUT_GENOME141183_02548		GUT_GENOME018678_00576			GUT_GENOME096193_00762	GUT_GENOME039567_01364		GUT_GENOME017898_00510	GUT_GENOME106118_00531		GUT_GENOME286625_01429
	GUT_GENOME143361_01867	GUT_GENOME000047_00065		GUT_GENOME000559_02484	GUT_GENOME176465_02732	GUT_GENOME140330_01236	GUT_GENOME150050_00434	GUT_GENOME246927_00049				GUT_GENOME096080_04009	GUT_GENOME007693_00785	GUT_GENOME096523_00797				GUT_GENOME147612_01348	GUT_GENOME140078_00088	GUT_GENOME143506_00240	GUT_GENOME096286_02138	GUT_GENOME155674_01800	GUT_GENOME014039_01198		GUT_GENOME177790_01581		GUT_GENOME000725_04924	GUT_GENOME083985_00145	GUT_GENOME001422_02756	GUT_GENOME268486_00522	GUT_GENOME231559_01928	GUT_GENOME096445_00490						GUT_GENOME111598_00394		GUT_GENOME145984_02868			GUT_GENOME113868_01623	GUT_GENOME096291_01414		GUT_GENOME096246_00474	GUT_GENOME096435_02019		GUT_GENOME246008_00597
	GUT_GENOME096378_00020	GUT_GENOME021760_00217		GUT_GENOME000259_00902	GUT_GENOME143489_01947	GUT_GENOME222694_00310	GUT_GENOME157213_00812	GUT_GENOME113153_02291				GUT_GENOME000192_02313	GUT_GENOME000578_00963	GUT_GENOME094675_01109				GUT_GENOME096201_01817	GUT_GENOME001490_00815	GUT_GENOME096406_04221	GUT_GENOME000655_01484	GUT_GENOME122359_00615	GUT_GENOME114679_00706		GUT_GENOME000220_01218		GUT_GENOME001779_02346	GUT_GENOME248856_00542	GUT_GENOME244156_01564	GUT_GENOME140074_01906	GUT_GENOME095993_00255	GUT_GENOME109727_00345						GUT_GENOME143727_00549		GUT_GENOME000565_01260			GUT_GENOME235147_01472	GUT_GENOME125765_00939		GUT_GENOME141059_02085	GUT_GENOME101275_00452		GUT_GENOME096274_00785
	GUT_GENOME145698_04275	GUT_GENOME241248_00510		GUT_GENOME137680_00222	GUT_GENOME109986_00827	GUT_GENOME018576_01055	GUT_GENOME001282_01407	GUT_GENOME014888_02086				GUT_GENOME140808_01055	GUT_GENOME056730_00066	GUT_GENOME103766_03575				GUT_GENOME140240_03502	GUT_GENOME001659_01438	GUT_GENOME000727_01546	GUT_GENOME096174_03465	GUT_GENOME001115_00939	GUT_GENOME069124_00406		GUT_GENOME251243_01121		GUT_GENOME217674_00917	GUT_GENOME197012_01415	GUT_GENOME238419_01428	GUT_GENOME096543_00125	GUT_GENOME004333_00858	GUT_GENOME001340_01174						GUT_GENOME000603_01712		GUT_GENOME103766_02860			GUT_GENOME285906_02161	GUT_GENOME000931_00178		GUT_GENOME243582_01119	GUT_GENOME096494_00751		GUT_GENOME096084_02175
	GUT_GENOME143408_00101	GUT_GENOME155926_01373		GUT_GENOME005165_00899	GUT_GENOME095352_01154	GUT_GENOME143724_00293	GUT_GENOME283050_02822	GUT_GENOME096534_01992				GUT_GENOME096063_03265	GUT_GENOME143131_02546	GUT_GENOME277093_01317				GUT_GENOME140078_00088	GUT_GENOME001773_02012	GUT_GENOME145981_01875	GUT_GENOME000629_01341	GUT_GENOME140245_02933	GUT_GENOME096192_02015		GUT_GENOME258883_01647		GUT_GENOME017883_00822	GUT_GENOME102353_02392	GUT_GENOME140361_00876	GUT_GENOME038289_00140	GUT_GENOME001056_00025	GUT_GENOME143493_00806						GUT_GENOME076944_02249		GUT_GENOME105496_00969			GUT_GENOME008975_02121	GUT_GENOME096559_02048		GUT_GENOME237201_01247	GUT_GENOME003176_01137		GUT_GENOME275636_01325
	GUT_GENOME258847_02517	GUT_GENOME111598_02123		GUT_GENOME056730_00951	GUT_GENOME084477_00171	GUT_GENOME000285_00347	GUT_GENOME225144_01050	GUT_GENOME143505_04078				GUT_GENOME096301_01394	GUT_GENOME143232_01295	GUT_GENOME237868_01899					GUT_GENOME238401_01979	GUT_GENOME010337_00970	GUT_GENOME095967_00507	GUT_GENOME232082_02053	GUT_GENOME142415_01868		GUT_GENOME001745_01384		GUT_GENOME022392_01775	GUT_GENOME011146_00370	GUT_GENOME145698_02064	GUT_GENOME154740_01722	GUT_GENOME140233_01836	GUT_GENOME003284_00705						GUT_GENOME171359_03011		GUT_GENOME143411_00033			GUT_GENOME096473_03585	GUT_GENOME001769_00304		GUT_GENOME258224_00905	GUT_GENOME008492_01120		GUT_GENOME017205_01312
	GUT_GENOME000001_03200	GUT_GENOME140270_01330		GUT_GENOME213666_00065	GUT_GENOME000595_04166	GUT_GENOME159262_02506	GUT_GENOME019095_00583	GUT_GENOME275347_01722				GUT_GENOME143131_02437	GUT_GENOME239789_03552	GUT_GENOME207745_02033					GUT_GENOME001745_03070	GUT_GENOME001602_01778	GUT_GENOME143723_02525	GUT_GENOME147115_00837	GUT_GENOME286118_01095		GUT_GENOME218891_00729		GUT_GENOME258514_00084	GUT_GENOME049730_01411	GUT_GENOME000598_02456	GUT_GENOME194726_00233	GUT_GENOME283282_01415	GUT_GENOME008152_00108						GUT_GENOME140361_03360		GUT_GENOME144544_00220			GUT_GENOME010023_02008	GUT_GENOME242764_02537		GUT_GENOME260346_00360	GUT_GENOME141187_02461		GUT_GENOME154740_01254
	GUT_GENOME207512_00625	GUT_GENOME231814_02999		GUT_GENOME076493_00281	GUT_GENOME095993_02378	GUT_GENOME095995_02044	GUT_GENOME080845_00336	GUT_GENOME270087_01371				GUT_GENOME114436_02262	GUT_GENOME154740_01547	GUT_GENOME258629_00253					GUT_GENOME113217_01086	GUT_GENOME096449_03295	GUT_GENOME096083_03564	GUT_GENOME140808_02714	GUT_GENOME253287_00031		GUT_GENOME142411_01584		GUT_GENOME008492_00366	GUT_GENOME035792_02038	GUT_GENOME096381_01738	GUT_GENOME137156_00616	GUT_GENOME000727_02960	GUT_GENOME225784_01974						GUT_GENOME280504_01247		GUT_GENOME256176_00716			GUT_GENOME230645_01434	GUT_GENOME044483_03930		GUT_GENOME247220_00643	GUT_GENOME095967_01395		GUT_GENOME095967_02174
	GUT_GENOME283627_00533	GUT_GENOME283701_00570		GUT_GENOME095296_01149	GUT_GENOME035872_01549	GUT_GENOME111543_01626	GUT_GENOME096286_00296	GUT_GENOME150050_00434				GUT_GENOME000231_02847	GUT_GENOME096080_04009	GUT_GENOME094850_00733					GUT_GENOME118160_00628	GUT_GENOME034178_03100	GUT_GENOME122359_00740	GUT_GENOME096292_02488	GUT_GENOME102034_00962		GUT_GENOME231300_01844		GUT_GENOME096063_03824	GUT_GENOME078034_00019	GUT_GENOME170612_00827	GUT_GENOME207341_00172	GUT_GENOME207228_00208	GUT_GENOME027824_01234						GUT_GENOME127461_00355		GUT_GENOME018882_00294			GUT_GENOME000260_03065	GUT_GENOME164136_01591		GUT_GENOME236014_01058	GUT_GENOME096253_01086		GUT_GENOME095941_01354
	GUT_GENOME000559_03864	GUT_GENOME222123_01964		GUT_GENOME140808_03967	GUT_GENOME017828_01559	GUT_GENOME000595_02555	GUT_GENOME001324_01929	GUT_GENOME157213_00812				GUT_GENOME239728_02535	GUT_GENOME000192_02313	GUT_GENOME101940_00644					GUT_GENOME217674_03692	GUT_GENOME237059_01684	GUT_GENOME042029_00137	GUT_GENOME096366_02071	GUT_GENOME217350_00170		GUT_GENOME254013_00904		GUT_GENOME095991_02030	GUT_GENOME188619_01542	GUT_GENOME094468_00778	GUT_GENOME231453_00794	GUT_GENOME194081_01086	GUT_GENOME096372_00861						GUT_GENOME258247_01418		GUT_GENOME231599_02829			GUT_GENOME125009_01090	GUT_GENOME001653_00323		GUT_GENOME257483_01139	GUT_GENOME251112_00968		GUT_GENOME225259_00132
	GUT_GENOME198893_00707	GUT_GENOME001364_03305		GUT_GENOME147524_00120	GUT_GENOME096244_02944		GUT_GENOME000200_01876	GUT_GENOME001282_01407				GUT_GENOME001255_02054	GUT_GENOME001189_02889	GUT_GENOME212260_00813					GUT_GENOME102353_01009	GUT_GENOME260051_01145	GUT_GENOME218891_00184	GUT_GENOME096495_00447	GUT_GENOME188395_02661		GUT_GENOME001635_00732		GUT_GENOME143505_00618	GUT_GENOME035750_01241	GUT_GENOME000133_02406	GUT_GENOME147598_00182	GUT_GENOME143489_02554	GUT_GENOME147678_01330						GUT_GENOME143760_02051		GUT_GENOME000595_00904			GUT_GENOME095983_00242	GUT_GENOME275347_01230		GUT_GENOME103751_03915	GUT_GENOME182432_00270		GUT_GENOME096170_00147
	GUT_GENOME146009_03103	GUT_GENOME232302_01624		GUT_GENOME075528_00649	GUT_GENOME096507_00454		GUT_GENOME140330_01236	GUT_GENOME234139_00227				GUT_GENOME268227_01883	GUT_GENOME065504_03016	GUT_GENOME103868_04071					GUT_GENOME155679_00023	GUT_GENOME016358_00550	GUT_GENOME145378_03972	GUT_GENOME132185_01108	GUT_GENOME096386_01922		GUT_GENOME140076_04127		GUT_GENOME000122_00273	GUT_GENOME007714_01067	GUT_GENOME128641_00834	GUT_GENOME155439_01319	GUT_GENOME000852_03255	GUT_GENOME240840_00652						GUT_GENOME000595_01004		GUT_GENOME096025_02008			GUT_GENOME125783_00172	GUT_GENOME141371_01917		GUT_GENOME012681_01566	GUT_GENOME018819_01307		GUT_GENOME195758_00963
	GUT_GENOME000483_01657	GUT_GENOME115838_01147		GUT_GENOME231599_00110	GUT_GENOME000980_03671		GUT_GENOME037804_02137	GUT_GENOME248577_01396				GUT_GENOME001488_00080	GUT_GENOME066225_01393	GUT_GENOME147138_02651					GUT_GENOME212961_00853	GUT_GENOME001364_03354	GUT_GENOME096174_02389	GUT_GENOME235498_00749	GUT_GENOME217842_00878		GUT_GENOME001120_04849		GUT_GENOME095991_00488	GUT_GENOME000608_01556	GUT_GENOME096300_00453	GUT_GENOME000192_00691	GUT_GENOME173058_01476	GUT_GENOME037207_01337						GUT_GENOME000245_02125		GUT_GENOME117621_02608			GUT_GENOME046057_00678	GUT_GENOME001805_00318		GUT_GENOME001297_02547	GUT_GENOME243949_00020		GUT_GENOME247084_01560
	GUT_GENOME143407_00627	GUT_GENOME096378_00020		GUT_GENOME103863_02139	GUT_GENOME247095_03606		GUT_GENOME275692_00410	GUT_GENOME080845_00336				GUT_GENOME126719_01768	GUT_GENOME146010_03458	GUT_GENOME164213_00090					GUT_GENOME231320_00682	GUT_GENOME098402_01345	GUT_GENOME000008_00481	GUT_GENOME155679_01135	GUT_GENOME243020_01262		GUT_GENOME096256_02573		GUT_GENOME147524_02716	GUT_GENOME128621_01051	GUT_GENOME103710_01715	GUT_GENOME143747_04623	GUT_GENOME097737_00280	GUT_GENOME141765_00592						GUT_GENOME103705_04120		GUT_GENOME052918_00594			GUT_GENOME001223_01194	GUT_GENOME000537_00768		GUT_GENOME258433_00576	GUT_GENOME147523_01023		GUT_GENOME260051_00815
	GUT_GENOME016749_01338	GUT_GENOME176465_01236		GUT_GENOME211901_00014	GUT_GENOME000963_01742		GUT_GENOME232013_01727	GUT_GENOME096286_00296				GUT_GENOME145985_01122	GUT_GENOME156119_01507	GUT_GENOME007693_00785					GUT_GENOME000682_01675	GUT_GENOME141809_00873	GUT_GENOME143505_04187	GUT_GENOME254013_01178	GUT_GENOME013055_00035		GUT_GENOME000008_01013		GUT_GENOME001471_02446	GUT_GENOME001120_01575	GUT_GENOME141315_00461	GUT_GENOME155439_00100	GUT_GENOME015416_00573	GUT_GENOME148088_00567						GUT_GENOME096384_01962		GUT_GENOME128042_01234			GUT_GENOME095520_01686	GUT_GENOME018575_00264		GUT_GENOME146009_01658	GUT_GENOME044529_00816		GUT_GENOME001417_02217
	GUT_GENOME145698_03703	GUT_GENOME140270_05780		GUT_GENOME001282_00656	GUT_GENOME208016_01314		GUT_GENOME000285_00347	GUT_GENOME001324_01929				GUT_GENOME009249_01514	GUT_GENOME142628_02449	GUT_GENOME056730_00066					GUT_GENOME143484_02505	GUT_GENOME146009_02236	GUT_GENOME096174_02404	GUT_GENOME022484_00569	GUT_GENOME113571_00358		GUT_GENOME001003_03683		GUT_GENOME143505_01099	GUT_GENOME047932_00237	GUT_GENOME140074_01923	GUT_GENOME143740_03892	GUT_GENOME239428_00052	GUT_GENOME096399_00092						GUT_GENOME035511_00916		GUT_GENOME115357_01797			GUT_GENOME001854_02068	GUT_GENOME113153_01820		GUT_GENOME000166_01503	GUT_GENOME239538_02047		GUT_GENOME096276_02019
	GUT_GENOME231247_03238	GUT_GENOME207228_00022		GUT_GENOME142031_03377	GUT_GENOME096491_01985		GUT_GENOME159262_02506	GUT_GENOME108492_01397				GUT_GENOME000122_00977	GUT_GENOME143131_02437	GUT_GENOME096542_01351					GUT_GENOME156224_00303	GUT_GENOME096248_02555	GUT_GENOME253356_01309	GUT_GENOME096210_03344	GUT_GENOME217586_00366		GUT_GENOME001341_02309		GUT_GENOME140074_01923	GUT_GENOME087542_00565	GUT_GENOME207750_00405	GUT_GENOME212260_04172	GUT_GENOME017394_01553	GUT_GENOME196908_01479						GUT_GENOME231257_04337		GUT_GENOME032708_00461			GUT_GENOME251721_01390	GUT_GENOME261979_00208		GUT_GENOME231932_00100	GUT_GENOME157951_00312		GUT_GENOME143749_04299
	GUT_GENOME147164_00272	GUT_GENOME080351_01740		GUT_GENOME057155_00439	GUT_GENOME140074_00614		GUT_GENOME185251_00051	GUT_GENOME096485_00642				GUT_GENOME095941_00658	GUT_GENOME143522_01179	GUT_GENOME092528_01346					GUT_GENOME231812_01276	GUT_GENOME096543_02103	GUT_GENOME140808_03688	GUT_GENOME096415_01458	GUT_GENOME096538_02864		GUT_GENOME250527_02579		GUT_GENOME001341_02773	GUT_GENOME086641_00665	GUT_GENOME242920_00039	GUT_GENOME156244_01452	GUT_GENOME032405_00040	GUT_GENOME268486_00522						GUT_GENOME232194_01438		GUT_GENOME095995_03714			GUT_GENOME138767_02069	GUT_GENOME237519_00247		GUT_GENOME045096_00885	GUT_GENOME103712_00235		GUT_GENOME019103_01643
	GUT_GENOME171567_03244	GUT_GENOME232192_00106		GUT_GENOME155164_02048	GUT_GENOME171359_02882		GUT_GENOME159606_02258	GUT_GENOME037804_02137				GUT_GENOME001189_01164	GUT_GENOME206071_00847	GUT_GENOME096425_00842					GUT_GENOME110705_00238	GUT_GENOME113915_01926	GUT_GENOME143711_03211	GUT_GENOME258883_01324	GUT_GENOME249268_02799		GUT_GENOME019095_01190		GUT_GENOME283627_01226	GUT_GENOME083197_00697	GUT_GENOME263866_02051	GUT_GENOME103751_04123	GUT_GENOME147522_00662	GUT_GENOME018882_00062						GUT_GENOME146008_00529		GUT_GENOME096480_00270			GUT_GENOME237519_00907	GUT_GENOME023366_00480		GUT_GENOME096099_03295	GUT_GENOME096701_01860		GUT_GENOME017455_01575
	GUT_GENOME237487_00076	GUT_GENOME046070_00461		GUT_GENOME127803_01058	GUT_GENOME246551_01867		GUT_GENOME001316_01165	GUT_GENOME275692_00410				GUT_GENOME258721_02339	GUT_GENOME097684_03225	GUT_GENOME146010_03458					GUT_GENOME014138_00821	GUT_GENOME238208_00881	GUT_GENOME122359_00739	GUT_GENOME133541_02537	GUT_GENOME097987_01972		GUT_GENOME067546_01901		GUT_GENOME159262_02299	GUT_GENOME266465_00103	GUT_GENOME045758_00678	GUT_GENOME143723_01479	GUT_GENOME145982_02663	GUT_GENOME257495_00930						GUT_GENOME143746_01089		GUT_GENOME019103_01626			GUT_GENOME155164_01648	GUT_GENOME172958_01143		GUT_GENOME153922_01023	GUT_GENOME248256_01886		GUT_GENOME145698_02645
	GUT_GENOME096096_00736	GUT_GENOME000559_03864		GUT_GENOME161213_00147	GUT_GENOME103727_02734		GUT_GENOME113527_01269	GUT_GENOME140330_01236				GUT_GENOME001120_04903	GUT_GENOME243602_00474	GUT_GENOME046057_01727					GUT_GENOME097844_01116	GUT_GENOME147525_03090	GUT_GENOME247791_00764	GUT_GENOME219276_00406	GUT_GENOME067489_00047		GUT_GENOME017597_01875		GUT_GENOME144544_01947	GUT_GENOME258758_02469	GUT_GENOME143138_01737	GUT_GENOME095995_01571	GUT_GENOME245896_00784	GUT_GENOME096508_00215						GUT_GENOME171356_00583		GUT_GENOME034763_00543			GUT_GENOME110705_01105	GUT_GENOME163027_01946		GUT_GENOME058339_00502	GUT_GENOME219388_01323		GUT_GENOME043942_00381
	GUT_GENOME147598_00606	GUT_GENOME198893_00707		GUT_GENOME143746_02232	GUT_GENOME025308_01549		GUT_GENOME239789_02969	GUT_GENOME094321_00594				GUT_GENOME229830_00294	GUT_GENOME276949_00004	GUT_GENOME142610_00568					GUT_GENOME094660_02412	GUT_GENOME236889_02216	GUT_GENOME143505_01838	GUT_GENOME161370_01616	GUT_GENOME244654_01139		GUT_GENOME231397_02668		GUT_GENOME001255_03519	GUT_GENOME004335_00709	GUT_GENOME232472_00422	GUT_GENOME143712_00262	GUT_GENOME282610_00195	GUT_GENOME001282_01407						GUT_GENOME096561_01867		GUT_GENOME143489_00981			GUT_GENOME133961_01209	GUT_GENOME277672_01631		GUT_GENOME188058_01298	GUT_GENOME112794_00818		GUT_GENOME096178_01262
	GUT_GENOME145378_03538	GUT_GENOME141284_02980		GUT_GENOME141675_02060	GUT_GENOME239673_04259		GUT_GENOME137680_00639	GUT_GENOME258449_01822				GUT_GENOME001418_00827	GUT_GENOME000231_02847	GUT_GENOME200288_04127					GUT_GENOME069692_00921	GUT_GENOME132077_00344	GUT_GENOME019335_01624	GUT_GENOME110833_01544	GUT_GENOME101260_00445		GUT_GENOME001488_01234		GUT_GENOME001877_01644	GUT_GENOME258198_00073	GUT_GENOME141334_02591	GUT_GENOME143727_03019	GUT_GENOME082534_00570	GUT_GENOME143497_01540						GUT_GENOME096472_00110		GUT_GENOME143118_00795			GUT_GENOME108993_00740	GUT_GENOME001800_01730		GUT_GENOME141089_02310	GUT_GENOME092065_01229		GUT_GENOME101256_01541
	GUT_GENOME194726_00393	GUT_GENOME145698_03703		GUT_GENOME076000_02375	GUT_GENOME232220_04489		GUT_GENOME239268_00514	GUT_GENOME018576_01055				GUT_GENOME096292_01002	GUT_GENOME109114_01234	GUT_GENOME266139_01502					GUT_GENOME020577_00887	GUT_GENOME271908_01661	GUT_GENOME258721_01934	GUT_GENOME097987_01537	GUT_GENOME142596_00731		GUT_GENOME286118_00588		GUT_GENOME105301_01524	GUT_GENOME005080_01042	GUT_GENOME159026_00221	GUT_GENOME001115_03125	GUT_GENOME001159_02664	GUT_GENOME000367_01076						GUT_GENOME145695_04526		GUT_GENOME145984_00712			GUT_GENOME169940_00667	GUT_GENOME274466_00318		GUT_GENOME218103_00183	GUT_GENOME283126_01246		GUT_GENOME033647_01866
	GUT_GENOME141425_02762	GUT_GENOME147542_00263		GUT_GENOME232008_02489	GUT_GENOME000131_00229		GUT_GENOME121220_01549	GUT_GENOME013560_01446				GUT_GENOME254975_01702	GUT_GENOME108993_00251	GUT_GENOME242942_01146					GUT_GENOME001602_01778	GUT_GENOME142546_03273	GUT_GENOME143505_01902	GUT_GENOME253287_02409	GUT_GENOME095967_02874		GUT_GENOME137680_01319		GUT_GENOME256243_00912	GUT_GENOME046831_00252	GUT_GENOME194589_01636	GUT_GENOME209802_01457	GUT_GENOME125926_00924	GUT_GENOME098045_00864						GUT_GENOME176465_01596		GUT_GENOME140106_00160			GUT_GENOME140786_01125	GUT_GENOME284871_00586		GUT_GENOME066938_00905	GUT_GENOME244012_01067		GUT_GENOME096276_02104
	GUT_GENOME006298_01075	GUT_GENOME207903_00078		GUT_GENOME257066_01845	GUT_GENOME096179_01722		GUT_GENOME237839_01102	GUT_GENOME098572_03252				GUT_GENOME253356_01128	GUT_GENOME097737_01191	GUT_GENOME000367_00522					GUT_GENOME208213_00492	GUT_GENOME200288_00580	GUT_GENOME145698_04510	GUT_GENOME149381_03083	GUT_GENOME065370_01299		GUT_GENOME102353_02610		GUT_GENOME219276_00239	GUT_GENOME112417_00333	GUT_GENOME175131_01929	GUT_GENOME145378_03101	GUT_GENOME207512_01557	GUT_GENOME238979_00830						GUT_GENOME147524_02562		GUT_GENOME279992_00161			GUT_GENOME140808_02719	GUT_GENOME137702_00465		GUT_GENOME260844_00064	GUT_GENOME145982_01740		GUT_GENOME125418_01595
	GUT_GENOME156895_00565	GUT_GENOME141436_00437		GUT_GENOME002382_01175	GUT_GENOME276542_01602		GUT_GENOME001003_03109	GUT_GENOME000285_00347				GUT_GENOME206071_02206	GUT_GENOME250439_02313	GUT_GENOME022861_01185					GUT_GENOME260051_01145	GUT_GENOME113709_01313	GUT_GENOME014039_00736	GUT_GENOME236874_00874	GUT_GENOME245772_01695		GUT_GENOME059449_01746		GUT_GENOME000608_00991	GUT_GENOME276542_00319	GUT_GENOME259081_01578		GUT_GENOME277093_01658	GUT_GENOME248577_01396						GUT_GENOME232302_02930		GUT_GENOME096170_00068			GUT_GENOME263846_00654	GUT_GENOME138470_02091		GUT_GENOME014039_00376	GUT_GENOME096564_01643		GUT_GENOME260051_00452
	GUT_GENOME147598_02344	GUT_GENOME143421_02143		GUT_GENOME100339_00946	GUT_GENOME241248_01891		GUT_GENOME249684_00936	GUT_GENOME159262_02506				GUT_GENOME096200_03050	GUT_GENOME250527_00036	GUT_GENOME207750_01101					GUT_GENOME205656_00299	GUT_GENOME092107_00687	GUT_GENOME156244_00792	GUT_GENOME000655_02224	GUT_GENOME096443_03669		GUT_GENOME000513_03334		GUT_GENOME246211_00615	GUT_GENOME163017_00138	GUT_GENOME149497_02390		GUT_GENOME001213_01382	GUT_GENOME164213_00182						GUT_GENOME141145_00558		GUT_GENOME061534_01460			GUT_GENOME103364_00793	GUT_GENOME141187_00405		GUT_GENOME096879_03029	GUT_GENOME272420_00922		GUT_GENOME096302_01439
	GUT_GENOME102441_00964	GUT_GENOME277044_01623		GUT_GENOME124777_00520	GUT_GENOME145981_01733		GUT_GENOME096206_00992	GUT_GENOME113527_01269				GUT_GENOME096294_04785	GUT_GENOME000122_00977	GUT_GENOME141005_00104					GUT_GENOME239725_01263	GUT_GENOME205238_01393	GUT_GENOME239725_03214	GUT_GENOME109512_02659	GUT_GENOME105301_03888		GUT_GENOME195281_00441		GUT_GENOME095967_02887	GUT_GENOME108231_01578	GUT_GENOME215898_01212		GUT_GENOME098568_00505	GUT_GENOME001738_02260						GUT_GENOME143749_00600		GUT_GENOME143726_01783			GUT_GENOME247624_00607	GUT_GENOME094995_01238		GUT_GENOME096533_03519	GUT_GENOME038048_00354		GUT_GENOME036853_01182
	GUT_GENOME140340_01736	GUT_GENOME096096_00736		GUT_GENOME019335_01747	GUT_GENOME145698_00857		GUT_GENOME017898_00998	GUT_GENOME137680_00639				GUT_GENOME239725_00508	GUT_GENOME001120_04903	GUT_GENOME007607_00556					GUT_GENOME000677_00505	GUT_GENOME285651_01552	GUT_GENOME141436_00343	GUT_GENOME258629_01130	GUT_GENOME179657_00866		GUT_GENOME039867_00546		GUT_GENOME140826_02965	GUT_GENOME258728_00025	GUT_GENOME000338_03652		GUT_GENOME116934_00119	GUT_GENOME142458_01481						GUT_GENOME143749_03651		GUT_GENOME143747_01700			GUT_GENOME001270_03718	GUT_GENOME006314_02300		GUT_GENOME113153_01052	GUT_GENOME008342_00171		GUT_GENOME001354_01761
	GUT_GENOME143746_01269	GUT_GENOME147598_00606		GUT_GENOME193403_00355	GUT_GENOME177196_00966		GUT_GENOME244171_01934	GUT_GENOME239268_00514				GUT_GENOME239684_01597	GUT_GENOME096292_01002	GUT_GENOME284003_01654					GUT_GENOME141809_00873	GUT_GENOME231920_00223	GUT_GENOME139147_00349	GUT_GENOME125517_00329	GUT_GENOME269730_00419		GUT_GENOME029301_00073		GUT_GENOME096080_04193	GUT_GENOME007443_01163	GUT_GENOME137833_01006		GUT_GENOME175344_01097	GUT_GENOME257069_00164						GUT_GENOME000623_00815		GUT_GENOME000852_01309			GUT_GENOME007693_00001	GUT_GENOME173869_00133		GUT_GENOME039567_00123	GUT_GENOME236405_01840		GUT_GENOME095941_02292
	GUT_GENOME144544_00227	GUT_GENOME096540_01795		GUT_GENOME212260_02000	GUT_GENOME231431_01323		GUT_GENOME176717_00572	GUT_GENOME000141_00301				GUT_GENOME000231_00101	GUT_GENOME140233_03208	GUT_GENOME246267_00623					GUT_GENOME096096_00272	GUT_GENOME096077_02007	GUT_GENOME022392_02009	GUT_GENOME000035_03410	GUT_GENOME001115_00939		GUT_GENOME096080_02848		GUT_GENOME000152_02492	GUT_GENOME018161_00743	GUT_GENOME143726_00359		GUT_GENOME147523_01025	GUT_GENOME006298_01403						GUT_GENOME279992_01332		GUT_GENOME171356_00230			GUT_GENOME092292_01255	GUT_GENOME102441_01733		GUT_GENOME000572_00719	GUT_GENOME110273_01375		GUT_GENOME225259_00348
	GUT_GENOME143379_00090	GUT_GENOME194726_00393		GUT_GENOME145378_03901	GUT_GENOME026466_00730		GUT_GENOME111543_01626	GUT_GENOME121220_01549				GUT_GENOME143505_02912	GUT_GENOME253356_01128	GUT_GENOME239643_01485					GUT_GENOME005080_01016	GUT_GENOME235498_01122	GUT_GENOME103766_04491	GUT_GENOME133372_01176	GUT_GENOME140245_02933		GUT_GENOME020577_00914		GUT_GENOME027824_00935	GUT_GENOME140352_03610	GUT_GENOME218730_00332		GUT_GENOME140106_01045	GUT_GENOME096300_02025						GUT_GENOME255273_00687		GUT_GENOME142457_03673			GUT_GENOME141586_00349	GUT_GENOME008742_00689		GUT_GENOME155959_00282	GUT_GENOME239115_00057		GUT_GENOME096489_01424
	GUT_GENOME143740_00488	GUT_GENOME006298_01075		GUT_GENOME094468_00707	GUT_GENOME282385_00062		GUT_GENOME249268_01989	GUT_GENOME237839_01102				GUT_GENOME143188_00152	GUT_GENOME096473_04884	GUT_GENOME004807_01446					GUT_GENOME001297_01197	GUT_GENOME232192_03996	GUT_GENOME000285_00145	GUT_GENOME000583_01414	GUT_GENOME259479_00220		GUT_GENOME264037_00322		GUT_GENOME096191_01893	GUT_GENOME001245_01017	GUT_GENOME282720_00020		GUT_GENOME096511_00574	GUT_GENOME137156_00616						GUT_GENOME046070_01708		GUT_GENOME142031_01300			GUT_GENOME236239_02250	GUT_GENOME245498_01064		GUT_GENOME176733_00074	GUT_GENOME096287_00082		GUT_GENOME145695_00886
	GUT_GENOME062339_00316	GUT_GENOME142411_00159		GUT_GENOME104300_00992	GUT_GENOME096572_01203		GUT_GENOME255646_01108	GUT_GENOME000899_01270				GUT_GENOME000554_02680	GUT_GENOME239643_01485	GUT_GENOME207678_00031					GUT_GENOME001120_01567	GUT_GENOME143749_01853	GUT_GENOME251721_01302	GUT_GENOME000655_01331	GUT_GENOME125256_00841		GUT_GENOME256155_00744		GUT_GENOME143484_01144	GUT_GENOME261579_00509	GUT_GENOME143124_03604		GUT_GENOME091104_00333	GUT_GENOME171367_02175						GUT_GENOME146010_02545		GUT_GENOME128042_01220			GUT_GENOME031710_01407	GUT_GENOME096283_02070		GUT_GENOME140713_01624	GUT_GENOME108231_01902		GUT_GENOME001046_01551
	GUT_GENOME171356_00655	GUT_GENOME156895_00565		GUT_GENOME057155_02237	GUT_GENOME103694_04921		GUT_GENOME149090_00121	GUT_GENOME249684_00936				GUT_GENOME147612_02772	GUT_GENOME095336_00414	GUT_GENOME037519_00035					GUT_GENOME146009_02236	GUT_GENOME220136_00986	GUT_GENOME141809_04966	GUT_GENOME149380_00298	GUT_GENOME259528_00383		GUT_GENOME214946_01881		GUT_GENOME256155_00186	GUT_GENOME253808_00456	GUT_GENOME145582_02439		GUT_GENOME266127_00494	GUT_GENOME000020_00540						GUT_GENOME143127_04410		GUT_GENOME143489_01063			GUT_GENOME057686_01888	GUT_GENOME096020_01855		GUT_GENOME237487_00722	GUT_GENOME008216_00262		GUT_GENOME034763_01229
	GUT_GENOME159700_00787	GUT_GENOME003308_00615		GUT_GENOME246461_01050	GUT_GENOME141054_04709		GUT_GENOME000595_02555	GUT_GENOME017898_00998				GUT_GENOME108259_01592	GUT_GENOME239725_00508	GUT_GENOME239725_00508					GUT_GENOME097987_01866	GUT_GENOME142486_01022	GUT_GENOME040420_01301	GUT_GENOME229830_02168	GUT_GENOME232082_02053		GUT_GENOME096499_01002		GUT_GENOME020741_00855	GUT_GENOME088178_01173	GUT_GENOME046070_00094		GUT_GENOME001659_00018	GUT_GENOME033705_00681						GUT_GENOME010791_01887		GUT_GENOME019103_01292			GUT_GENOME035907_00739	GUT_GENOME076000_00524		GUT_GENOME171567_01856	GUT_GENOME096300_02612		GUT_GENOME248086_01203
	GUT_GENOME143346_02334	GUT_GENOME096099_01955		GUT_GENOME092065_03241	GUT_GENOME206946_01650		GUT_GENOME009480_00095	GUT_GENOME111543_01626				GUT_GENOME145983_02457	GUT_GENOME265296_00743	GUT_GENOME103864_01629					GUT_GENOME005404_01307	GUT_GENOME143740_01378	GUT_GENOME000192_02084	GUT_GENOME159493_01192	GUT_GENOME274363_01087		GUT_GENOME229012_00947		GUT_GENOME121457_00350	GUT_GENOME253072_00786	GUT_GENOME171682_00431		GUT_GENOME009878_00386	GUT_GENOME139699_00541						GUT_GENOME096372_05183		GUT_GENOME095996_04307			GUT_GENOME175577_01835	GUT_GENOME096294_00114		GUT_GENOME275672_00647	GUT_GENOME121384_00666		GUT_GENOME042029_00101
	GUT_GENOME155926_00903	GUT_GENOME257704_06033		GUT_GENOME144544_03267	GUT_GENOME103705_01531		GUT_GENOME096210_00465	GUT_GENOME176717_00572				GUT_GENOME000008_02708	GUT_GENOME103864_01629	GUT_GENOME080362_01476					GUT_GENOME096543_02103	GUT_GENOME000575_02403	GUT_GENOME000187_01119	GUT_GENOME285301_00602	GUT_GENOME140808_02714		GUT_GENOME108554_01426		GUT_GENOME001778_01834	GUT_GENOME242840_02346	GUT_GENOME231436_03375		GUT_GENOME000545_00510	GUT_GENOME258449_01822						GUT_GENOME171567_03958		GUT_GENOME000047_00696			GUT_GENOME017612_00434	GUT_GENOME106095_00488		GUT_GENOME044483_02444	GUT_GENOME087773_01056		GUT_GENOME230476_01455
	GUT_GENOME095996_03224	GUT_GENOME151017_02084		GUT_GENOME096473_04676	GUT_GENOME091175_00340		GUT_GENOME207399_01550	GUT_GENOME244171_01934				GUT_GENOME096080_00649	GUT_GENOME139132_01371	GUT_GENOME268665_00648					GUT_GENOME002158_02594	GUT_GENOME114436_00599	GUT_GENOME253287_00178	GUT_GENOME141118_02521	GUT_GENOME147115_00837		GUT_GENOME159493_02071		GUT_GENOME022295_02076	GUT_GENOME083450_00310	GUT_GENOME140047_01484		GUT_GENOME159035_01502	GUT_GENOME039567_02208						GUT_GENOME247084_02654		GUT_GENOME001471_02383			GUT_GENOME140315_00774	GUT_GENOME232336_01421		GUT_GENOME009723_00519	GUT_GENOME274349_00290		GUT_GENOME286625_00690
	GUT_GENOME177056_01003	GUT_GENOME144544_00227		GUT_GENOME140245_01554	GUT_GENOME220728_00315		GUT_GENOME237499_01210	GUT_GENOME249268_01989				GUT_GENOME000285_01850	GUT_GENOME239789_00481	GUT_GENOME243824_02326					GUT_GENOME096332_00169	GUT_GENOME000338_03925	GUT_GENOME143505_01901	GUT_GENOME214069_00334	GUT_GENOME206546_00480		GUT_GENOME000231_02932		GUT_GENOME001297_01830	GUT_GENOME160374_00856	GUT_GENOME278390_02812		GUT_GENOME056716_00571	GUT_GENOME254341_00853						GUT_GENOME143711_02293		GUT_GENOME125418_01527			GUT_GENOME245660_00481	GUT_GENOME244583_01608		GUT_GENOME122322_00713	GUT_GENOME026754_00764		GUT_GENOME016626_00748
	GUT_GENOME143092_02426	GUT_GENOME156886_03176		GUT_GENOME176758_01817	GUT_GENOME000604_03817		GUT_GENOME070341_01697	GUT_GENOME149090_00121				GUT_GENOME140076_04797	GUT_GENOME000554_02680	GUT_GENOME000029_00154					GUT_GENOME147525_03090	GUT_GENOME000147_01296	GUT_GENOME258721_01935	GUT_GENOME022845_00913	GUT_GENOME014162_01120		GUT_GENOME143211_01000		GUT_GENOME236657_00512	GUT_GENOME175216_01718	GUT_GENOME018557_01717		GUT_GENOME103893_00068	GUT_GENOME151978_00476						GUT_GENOME258247_00786		GUT_GENOME252665_01483			GUT_GENOME115597_00367	GUT_GENOME018543_01313		GUT_GENOME011023_01856	GUT_GENOME254943_00680		GUT_GENOME195758_01150
	GUT_GENOME143747_02370	GUT_GENOME095952_01335		GUT_GENOME143726_02323	GUT_GENOME119503_01129		GUT_GENOME218891_01697	GUT_GENOME282994_00719				GUT_GENOME000192_01849	GUT_GENOME268665_00648	GUT_GENOME124317_02067					GUT_GENOME172443_01035	GUT_GENOME096533_00893	GUT_GENOME251721_01018	GUT_GENOME108993_00896	GUT_GENOME278390_01659		GUT_GENOME096203_01048		GUT_GENOME095983_00266	GUT_GENOME000237_01215	GUT_GENOME258161_02399		GUT_GENOME280168_00053	GUT_GENOME173857_00968						GUT_GENOME143527_03598		GUT_GENOME248086_00507			GUT_GENOME001147_01525	GUT_GENOME173857_02252		GUT_GENOME005405_01109	GUT_GENOME285134_00446		GUT_GENOME000047_01140
	GUT_GENOME141059_00700	GUT_GENOME140246_03378		GUT_GENOME141425_01859	GUT_GENOME141371_03423		GUT_GENOME084358_00282	GUT_GENOME009480_00095				GUT_GENOME147612_02957	GUT_GENOME125517_01073	GUT_GENOME108259_01592					GUT_GENOME014081_02019	GUT_GENOME147598_01344	GUT_GENOME000595_04341	GUT_GENOME000513_00795	GUT_GENOME170534_00162		GUT_GENOME254915_00733		GUT_GENOME250439_01565	GUT_GENOME237056_02340	GUT_GENOME000469_06115		GUT_GENOME258287_00446	GUT_GENOME100897_02005						GUT_GENOME232032_00751		GUT_GENOME125804_00170			GUT_GENOME116807_00311	GUT_GENOME096465_01455		GUT_GENOME096443_01767	GUT_GENOME058212_01551		GUT_GENOME154740_02088
	GUT_GENOME096075_01469	GUT_GENOME062339_00316		GUT_GENOME065321_01347	GUT_GENOME174465_00861		GUT_GENOME143751_03762	GUT_GENOME207399_01550				GUT_GENOME115272_01504	GUT_GENOME143232_04096	GUT_GENOME231257_01616					GUT_GENOME000735_02829	GUT_GENOME000767_02206	GUT_GENOME142411_00920	GUT_GENOME159262_03030	GUT_GENOME235498_00749		GUT_GENOME143202_01923		GUT_GENOME143190_03438	GUT_GENOME258847_01912	GUT_GENOME007158_01417		GUT_GENOME237779_00382	GUT_GENOME141041_00503						GUT_GENOME143752_02768		GUT_GENOME231257_02638			GUT_GENOME236888_00380	GUT_GENOME134977_00106		GUT_GENOME067136_00562	GUT_GENOME117761_02860		GUT_GENOME260051_01244
	GUT_GENOME212287_01444	GUT_GENOME142610_05927		GUT_GENOME042573_01161	GUT_GENOME243145_03226		GUT_GENOME096172_00207	GUT_GENOME237883_01336				GUT_GENOME218891_01707	GUT_GENOME207512_00402	GUT_GENOME142576_00124					GUT_GENOME231920_00223	GUT_GENOME200288_01395	GUT_GENOME247084_01802	GUT_GENOME009103_01661	GUT_GENOME132185_01108		GUT_GENOME237053_01322		GUT_GENOME140240_00915	GUT_GENOME217674_03791	GUT_GENOME175554_00576		GUT_GENOME279417_00258	GUT_GENOME243809_00762						GUT_GENOME143740_00271		GUT_GENOME140320_00759				GUT_GENOME141187_00645		GUT_GENOME103882_04570	GUT_GENOME147550_01112		GUT_GENOME033647_00647
	GUT_GENOME096293_00936	GUT_GENOME096381_06176		GUT_GENOME141425_04874	GUT_GENOME096442_00546		GUT_GENOME237446_00461	GUT_GENOME218891_01697				GUT_GENOME140808_00350	GUT_GENOME231257_01616	GUT_GENOME076493_01194					GUT_GENOME232472_01046	GUT_GENOME167947_02244		GUT_GENOME251243_00178	GUT_GENOME126012_00104		GUT_GENOME101248_01051		GUT_GENOME113915_00410	GUT_GENOME002826_01216	GUT_GENOME236879_01456		GUT_GENOME285123_00275	GUT_GENOME018983_00131						GUT_GENOME096495_02435		GUT_GENOME120773_01136				GUT_GENOME278559_00040		GUT_GENOME000784_00749	GUT_GENOME210309_01626		GUT_GENOME096259_01086
	GUT_GENOME143505_03956	GUT_GENOME146009_03961		GUT_GENOME201873_00031	GUT_GENOME117166_00602		GUT_GENOME013049_02008	GUT_GENOME094995_00245				GUT_GENOME261061_00062	GUT_GENOME024514_01119	GUT_GENOME112856_01555					GUT_GENOME001189_01259	GUT_GENOME234802_01723		GUT_GENOME023798_01401	GUT_GENOME155679_01135		GUT_GENOME277334_02100		GUT_GENOME130403_00895	GUT_GENOME219449_00407	GUT_GENOME153344_00951		GUT_GENOME154896_00396	GUT_GENOME172932_01000						GUT_GENOME143726_01374		GUT_GENOME045895_01892				GUT_GENOME256157_00992		GUT_GENOME000587_01864	GUT_GENOME010556_00884		GUT_GENOME237875_01331
	GUT_GENOME103893_00209	GUT_GENOME019145_00845		GUT_GENOME258247_00937	GUT_GENOME000559_02484		GUT_GENOME231431_01071	GUT_GENOME070341_01697				GUT_GENOME022484_02784	GUT_GENOME014491_00288	GUT_GENOME096248_01560					GUT_GENOME229574_00728	GUT_GENOME143724_04580		GUT_GENOME141436_05080	GUT_GENOME095426_00855		GUT_GENOME096174_01321		GUT_GENOME239257_00970	GUT_GENOME161955_00366	GUT_GENOME192289_00411		GUT_GENOME071857_01547	GUT_GENOME000141_00301						GUT_GENOME170498_00289		GUT_GENOME122227_00783				GUT_GENOME096067_01319		GUT_GENOME098777_01980	GUT_GENOME094468_00781		GUT_GENOME120773_01337
	GUT_GENOME252090_00198	GUT_GENOME034178_03449		GUT_GENOME142629_00540	GUT_GENOME143282_02797		GUT_GENOME208213_00603	GUT_GENOME237841_01556				GUT_GENOME216940_00065	GUT_GENOME155679_02121	GUT_GENOME232220_01011					GUT_GENOME000295_03501	GUT_GENOME014888_02171		GUT_GENOME143727_02843	GUT_GENOME254013_01178		GUT_GENOME258758_00426		GUT_GENOME209802_00811	GUT_GENOME243354_01615	GUT_GENOME126570_01463		GUT_GENOME156122_00259	GUT_GENOME143525_02627						GUT_GENOME047195_01706		GUT_GENOME038202_02393				GUT_GENOME285832_01922		GUT_GENOME096534_03199	GUT_GENOME140337_02182		GUT_GENOME096170_01306
	GUT_GENOME147598_03870	GUT_GENOME141734_00867		GUT_GENOME142457_03628	GUT_GENOME141183_00547		GUT_GENOME000724_02103	GUT_GENOME096172_00207				GUT_GENOME140826_01174	GUT_GENOME001418_03007	GUT_GENOME128517_02217					GUT_GENOME235498_01122	GUT_GENOME095996_01561		GUT_GENOME251721_03318	GUT_GENOME142587_05458		GUT_GENOME252977_01632		GUT_GENOME282385_01584	GUT_GENOME161997_00956	GUT_GENOME000049_01791		GUT_GENOME140278_02353	GUT_GENOME137446_01531						GUT_GENOME138452_01186		GUT_GENOME143711_00450				GUT_GENOME208505_01892		GUT_GENOME142490_00699	GUT_GENOME273018_00320		GUT_GENOME143711_03989
	GUT_GENOME145695_02086	GUT_GENOME103841_00580		GUT_GENOME230903_00577	GUT_GENOME137680_00222		GUT_GENOME231503_01877	GUT_GENOME142625_00308				GUT_GENOME000092_00587	GUT_GENOME001745_00029	GUT_GENOME140808_00350					GUT_GENOME001105_01720	GUT_GENOME017567_00310		GUT_GENOME199128_00384	GUT_GENOME111977_01415		GUT_GENOME237422_01005		GUT_GENOME108993_01055	GUT_GENOME085442_01027	GUT_GENOME000483_00218		GUT_GENOME027596_00507	GUT_GENOME115421_00261						GUT_GENOME145983_01418		GUT_GENOME143724_04242				GUT_GENOME246461_00085		GUT_GENOME000604_01195	GUT_GENOME000611_00022		GUT_GENOME249850_01850
	GUT_GENOME217674_01646	GUT_GENOME156063_01355		GUT_GENOME104146_00823	GUT_GENOME005165_00899		GUT_GENOME235152_01731	GUT_GENOME013049_02008				GUT_GENOME251721_03023	GUT_GENOME264227_01390	GUT_GENOME207750_02445					GUT_GENOME115935_00533	GUT_GENOME016626_00017		GUT_GENOME247475_02104	GUT_GENOME015047_02632		GUT_GENOME096415_03658		GUT_GENOME276949_01031	GUT_GENOME187127_01852	GUT_GENOME155275_01808		GUT_GENOME139646_00906	GUT_GENOME096388_00039						GUT_GENOME001417_00011		GUT_GENOME125418_01309				GUT_GENOME029301_02295		GUT_GENOME140314_00572	GUT_GENOME140045_00203		GUT_GENOME286625_00685
	GUT_GENOME103751_00266	GUT_GENOME096439_01089		GUT_GENOME267277_01309	GUT_GENOME095246_03279		GUT_GENOME110697_01422	GUT_GENOME143525_00209				GUT_GENOME096203_04121	GUT_GENOME128517_02217	GUT_GENOME147146_02542					GUT_GENOME143749_01853	GUT_GENOME147523_03286		GUT_GENOME253065_01191	GUT_GENOME002690_00652		GUT_GENOME108993_00766		GUT_GENOME046057_01924	GUT_GENOME180009_00383	GUT_GENOME143153_00581		GUT_GENOME095993_01162	GUT_GENOME156244_01452						GUT_GENOME063431_01968		GUT_GENOME098791_00503				GUT_GENOME276106_01844		GUT_GENOME095879_01383	GUT_GENOME011451_00835		GUT_GENOME033647_00725
	GUT_GENOME142525_01029	GUT_GENOME231250_00626		GUT_GENOME067136_02352	GUT_GENOME213666_00065		GUT_GENOME171326_01028	GUT_GENOME231431_01071				GUT_GENOME095971_01113	GUT_GENOME140808_00350	GUT_GENOME272874_02386					GUT_GENOME140245_02759	GUT_GENOME001575_00628		GUT_GENOME113868_00842	GUT_GENOME155959_01238		GUT_GENOME096292_01135		GUT_GENOME070485_03733	GUT_GENOME277090_00205	GUT_GENOME123310_00031		GUT_GENOME142057_03183	GUT_GENOME243681_00315						GUT_GENOME094468_00860		GUT_GENOME212260_01711				GUT_GENOME007523_00576		GUT_GENOME096550_05073	GUT_GENOME019292_00929		GUT_GENOME247791_01556
	GUT_GENOME062339_01690	GUT_GENOME000784_03036		GUT_GENOME096078_02695	GUT_GENOME096465_02000		GUT_GENOME031419_01980	GUT_GENOME231503_01877				GUT_GENOME126719_01326	GUT_GENOME038289_01719	GUT_GENOME037425_01610					GUT_GENOME140283_02558	GUT_GENOME095982_01040		GUT_GENOME283137_01044	GUT_GENOME000508_00871		GUT_GENOME235147_00697		GUT_GENOME281513_00758	GUT_GENOME096185_00531	GUT_GENOME096494_01373		GUT_GENOME000149_02468	GUT_GENOME117166_00484						GUT_GENOME143746_00221		GUT_GENOME231920_02351				GUT_GENOME096561_00938		GUT_GENOME017828_00295	GUT_GENOME251199_00159		GUT_GENOME194589_01451
	GUT_GENOME096384_01850	GUT_GENOME177056_01003		GUT_GENOME005405_01399	GUT_GENOME076493_00281		GUT_GENOME101260_02795	GUT_GENOME001870_03815				GUT_GENOME010933_01190	GUT_GENOME000094_00661	GUT_GENOME140826_01174					GUT_GENOME143740_01378	GUT_GENOME113961_01682		GUT_GENOME096020_01476	GUT_GENOME022484_00569		GUT_GENOME113322_01462		GUT_GENOME010337_00718	GUT_GENOME096144_00935	GUT_GENOME158646_01204		GUT_GENOME258044_00742	GUT_GENOME220794_01450						GUT_GENOME000594_00438		GUT_GENOME275636_00978				GUT_GENOME111912_00437		GUT_GENOME259535_00021	GUT_GENOME235551_00212		GUT_GENOME001354_00846
	GUT_GENOME141436_00696	GUT_GENOME142592_02767		GUT_GENOME208036_02243	GUT_GENOME095296_01149		GUT_GENOME148088_01319	GUT_GENOME235152_01731				GUT_GENOME229830_03719	GUT_GENOME140826_01174	GUT_GENOME243200_00227					GUT_GENOME246421_02000	GUT_GENOME142853_00273		GUT_GENOME002158_02694	GUT_GENOME026217_00309		GUT_GENOME237056_00628		GUT_GENOME143232_02166	GUT_GENOME143760_00919	GUT_GENOME143751_04012		GUT_GENOME258721_01271	GUT_GENOME258411_00909						GUT_GENOME103710_00368		GUT_GENOME231559_00920				GUT_GENOME244587_02252		GUT_GENOME001831_03213	GUT_GENOME203592_01293		GUT_GENOME260051_01605
	GUT_GENOME001208_00974	GUT_GENOME096075_01469		GUT_GENOME250990_00581	GUT_GENOME147524_00120		GUT_GENOME235498_01839	GUT_GENOME110697_01422				GUT_GENOME019103_00627	GUT_GENOME000092_00587	GUT_GENOME245427_01047					GUT_GENOME140240_01546	GUT_GENOME001417_01841		GUT_GENOME147612_01605	GUT_GENOME064659_00690		GUT_GENOME239725_01226		GUT_GENOME147678_01422	GUT_GENOME145695_00589	GUT_GENOME000219_00862		GUT_GENOME147152_03369	GUT_GENOME013049_01110						GUT_GENOME126012_02030		GUT_GENOME143400_02732				GUT_GENOME095707_00897		GUT_GENOME199922_01371	GUT_GENOME254202_00164		GUT_GENOME248086_00943
	GUT_GENOME231477_00896	GUT_GENOME080363_02129		GUT_GENOME283626_01284	GUT_GENOME198106_01373		GUT_GENOME010023_01759	GUT_GENOME031419_01980				GUT_GENOME001341_02418	GUT_GENOME239737_01189	GUT_GENOME159606_02564					GUT_GENOME147598_01344	GUT_GENOME001806_01210		GUT_GENOME000629_01341	GUT_GENOME096415_01458		GUT_GENOME226303_01841		GUT_GENOME022392_01103	GUT_GENOME124650_00404	GUT_GENOME282114_01366		GUT_GENOME136641_00904	GUT_GENOME096391_02222						GUT_GENOME000563_00165		GUT_GENOME045895_02084				GUT_GENOME024527_00467		GUT_GENOME141005_02124	GUT_GENOME007990_00219		GUT_GENOME236864_00071
	GUT_GENOME171597_04216	GUT_GENOME194757_01764		GUT_GENOME001135_03890	GUT_GENOME231599_00110		GUT_GENOME143726_01578	GUT_GENOME101260_02795				GUT_GENOME096256_01260	GUT_GENOME229830_03719	GUT_GENOME140412_00425					GUT_GENOME207399_01988	GUT_GENOME141734_00477		GUT_GENOME239663_00098	GUT_GENOME259567_00835		GUT_GENOME017597_02285		GUT_GENOME143751_02413	GUT_GENOME158553_00020	GUT_GENOME243145_02610		GUT_GENOME027824_01234	GUT_GENOME207169_01167						GUT_GENOME103751_00214		GUT_GENOME147525_02795				GUT_GENOME246951_00941		GUT_GENOME096428_00216	GUT_GENOME063091_01190		GUT_GENOME096293_00986
	GUT_GENOME283626_01507	GUT_GENOME123860_01329		GUT_GENOME036651_01484	GUT_GENOME147109_01150		GUT_GENOME023635_01028	GUT_GENOME148088_01319				GUT_GENOME000192_01593	GUT_GENOME243200_00227	GUT_GENOME096532_01459					GUT_GENOME268227_01883	GUT_GENOME143709_01427		GUT_GENOME018882_01460	GUT_GENOME165490_00044		GUT_GENOME040960_01879		GUT_GENOME097975_00548	GUT_GENOME153042_01600	GUT_GENOME143138_01214		GUT_GENOME141775_01852	GUT_GENOME214037_00805						GUT_GENOME118429_00196		GUT_GENOME143723_01419				GUT_GENOME029599_00815		GUT_GENOME000564_00749	GUT_GENOME120672_00204		GUT_GENOME258867_01863
	GUT_GENOME056112_00025	GUT_GENOME239690_05569		GUT_GENOME007693_00616	GUT_GENOME075528_00649		GUT_GENOME271908_00767	GUT_GENOME044229_00773				GUT_GENOME142411_01080	GUT_GENOME140076_03972	GUT_GENOME159348_01478					GUT_GENOME274350_00678	GUT_GENOME143751_03993		GUT_GENOME001120_01855	GUT_GENOME152364_00142		GUT_GENOME258847_00665		GUT_GENOME041343_01022	GUT_GENOME104146_01356	GUT_GENOME143604_02380		GUT_GENOME138841_02458	GUT_GENOME245185_00814						GUT_GENOME103762_02762		GUT_GENOME143407_02847				GUT_GENOME059153_01192		GUT_GENOME234915_00780	GUT_GENOME270963_00569		GUT_GENOME096246_02303
	GUT_GENOME142031_02298	GUT_GENOME113217_02594		GUT_GENOME130417_01943	GUT_GENOME096491_02532		GUT_GENOME236405_00115	GUT_GENOME235498_01839				GUT_GENOME000682_02162	GUT_GENOME095971_01113	GUT_GENOME207750_01888					GUT_GENOME096098_01951	GUT_GENOME096468_03383		GUT_GENOME060023_00868	GUT_GENOME257151_00260		GUT_GENOME001418_03099		GUT_GENOME131708_01714	GUT_GENOME095983_00479	GUT_GENOME171648_00322		GUT_GENOME147678_01330	GUT_GENOME000029_00669						GUT_GENOME143723_01137		GUT_GENOME103751_02210				GUT_GENOME150307_01114		GUT_GENOME278789_00649	GUT_GENOME152509_01481		GUT_GENOME230902_01007
	GUT_GENOME096246_03138	GUT_GENOME232849_01452		GUT_GENOME111334_02145	GUT_GENOME103863_00323		GUT_GENOME025653_00401	GUT_GENOME158633_01173				GUT_GENOME121215_02349	GUT_GENOME010933_01190	GUT_GENOME095995_04394					GUT_GENOME062339_00133	GUT_GENOME140364_01580		GUT_GENOME122359_00740	GUT_GENOME276337_01186		GUT_GENOME233269_01755		GUT_GENOME001831_01407	GUT_GENOME196106_00162	GUT_GENOME025676_00995		GUT_GENOME140233_02370	GUT_GENOME207399_01550						GUT_GENOME207259_01276		GUT_GENOME248086_01113				GUT_GENOME007573_00525		GUT_GENOME192985_01773	GUT_GENOME096522_01980		GUT_GENOME275636_00481
	GUT_GENOME093315_01774	GUT_GENOME207475_02450		GUT_GENOME146009_03226	GUT_GENOME036853_01495		GUT_GENOME206071_00630	GUT_GENOME010023_01759				GUT_GENOME000285_01281	GUT_GENOME022484_04179	GUT_GENOME078306_00896					GUT_GENOME143724_04580	GUT_GENOME015763_00562		GUT_GENOME110705_00011	GUT_GENOME219276_00406		GUT_GENOME105301_02483		GUT_GENOME239662_00110	GUT_GENOME096415_00059	GUT_GENOME096513_00970		GUT_GENOME107146_00752	GUT_GENOME237883_01336						GUT_GENOME071027_01164		GUT_GENOME034763_01239				GUT_GENOME143156_01183		GUT_GENOME140340_00303	GUT_GENOME049452_00778		GUT_GENOME120773_01822
	GUT_GENOME177471_04500	GUT_GENOME145695_02086		GUT_GENOME140320_00101	GUT_GENOME242264_04044		GUT_GENOME093688_00333	GUT_GENOME007566_00863				GUT_GENOME263189_00268	GUT_GENOME096063_03529	GUT_GENOME239268_00477					GUT_GENOME096151_01162	GUT_GENOME142434_00954		GUT_GENOME199128_02720	GUT_GENOME097987_01537		GUT_GENOME117139_01362		GUT_GENOME140808_02101	GUT_GENOME104878_00953	GUT_GENOME000057_03116		GUT_GENOME231247_03799	GUT_GENOME193126_00120						GUT_GENOME000962_03380		GUT_GENOME096259_00731				GUT_GENOME256509_01007		GUT_GENOME000295_00327	GUT_GENOME001241_01790		GUT_GENOME249850_01978
	GUT_GENOME096257_03578	GUT_GENOME000017_02453		GUT_GENOME142576_00144	GUT_GENOME103863_02139		GUT_GENOME111778_01048	GUT_GENOME271908_00767				GUT_GENOME096191_01348	GUT_GENOME066597_01526	GUT_GENOME117334_00490					GUT_GENOME000608_01045	GUT_GENOME036651_00577		GUT_GENOME139744_02063	GUT_GENOME236874_00874		GUT_GENOME135463_00532		GUT_GENOME258758_00893	GUT_GENOME141068_00406	GUT_GENOME275813_00884		GUT_GENOME001471_00933	GUT_GENOME237841_01556						GUT_GENOME140826_02123		GUT_GENOME017938_01833				GUT_GENOME246802_02320		GUT_GENOME112985_00416	GUT_GENOME208002_01239		GUT_GENOME140078_00308
	GUT_GENOME095310_00469	GUT_GENOME142525_01029		GUT_GENOME169909_00018	GUT_GENOME211901_00014		GUT_GENOME000655_02460	GUT_GENOME000729_03934				GUT_GENOME001120_03571	GUT_GENOME260051_00197	GUT_GENOME161306_01062					GUT_GENOME000706_00651	GUT_GENOME014720_00605		GUT_GENOME140240_03495	GUT_GENOME271436_00483		GUT_GENOME121220_01341		GUT_GENOME096670_01427	GUT_GENOME175622_00711	GUT_GENOME095248_00499		GUT_GENOME032966_00306	GUT_GENOME025619_01755						GUT_GENOME231710_00829		GUT_GENOME255276_01436				GUT_GENOME007711_02952		GUT_GENOME130008_00471	GUT_GENOME232008_01033		GUT_GENOME095941_00923
	GUT_GENOME001147_00192	GUT_GENOME250728_02676		GUT_GENOME238208_01380	GUT_GENOME001282_00656		GUT_GENOME251627_00004	GUT_GENOME025653_00401				GUT_GENOME000035_00425	GUT_GENOME147854_04160	GUT_GENOME141315_03355					GUT_GENOME095996_01561	GUT_GENOME095941_01002		GUT_GENOME024079_01446	GUT_GENOME109512_02659		GUT_GENOME000122_01376		GUT_GENOME096174_02326	GUT_GENOME162261_01437	GUT_GENOME275692_01159		GUT_GENOME094937_00050	GUT_GENOME009542_00783						GUT_GENOME246834_00981		GUT_GENOME145980_02626				GUT_GENOME238306_00494		GUT_GENOME096525_03915	GUT_GENOME243814_01943		GUT_GENOME045895_02121
	GUT_GENOME178960_00978	GUT_GENOME141436_00696		GUT_GENOME260369_02002	GUT_GENOME149706_01137		GUT_GENOME000189_02906	GUT_GENOME256412_00751				GUT_GENOME101082_01192	GUT_GENOME095995_04394	GUT_GENOME096559_04989					GUT_GENOME000706_02337	GUT_GENOME001354_00267		GUT_GENOME001120_02618	GUT_GENOME000655_02224		GUT_GENOME000285_00399		GUT_GENOME206032_00214	GUT_GENOME104300_00274	GUT_GENOME256964_01015		GUT_GENOME148088_00567	GUT_GENOME115935_01856						GUT_GENOME231559_04574		GUT_GENOME096706_00329				GUT_GENOME282985_00338		GUT_GENOME097668_01575	GUT_GENOME104639_01566		GUT_GENOME165490_02086
	GUT_GENOME096067_01782	GUT_GENOME177471_00314		GUT_GENOME142031_02314	GUT_GENOME057155_00439		GUT_GENOME122359_02777	GUT_GENOME018156_01423				GUT_GENOME118228_03015	GUT_GENOME000196_02111	GUT_GENOME143718_00338					GUT_GENOME140283_01614	GUT_GENOME231806_01470		GUT_GENOME092829_01667	GUT_GENOME258629_01130		GUT_GENOME096366_00429		GUT_GENOME250973_01558	GUT_GENOME035872_00813	GUT_GENOME139699_00833		GUT_GENOME268486_00522	GUT_GENOME142586_01783						GUT_GENOME145378_03886		GUT_GENOME000706_02004				GUT_GENOME113868_01623		GUT_GENOME254518_01497	GUT_GENOME090745_00351		GUT_GENOME095967_01250
	GUT_GENOME143502_03039	GUT_GENOME140270_05365		GUT_GENOME147524_02458	GUT_GENOME211901_02046		GUT_GENOME133541_02921	GUT_GENOME251627_00004				GUT_GENOME096276_00018	GUT_GENOME140078_01254	GUT_GENOME096020_00010					GUT_GENOME140076_04797	GUT_GENOME103762_01103		GUT_GENOME098777_00813	GUT_GENOME141068_05433		GUT_GENOME249268_01486		GUT_GENOME253356_01184	GUT_GENOME000141_00192	GUT_GENOME256492_01275		GUT_GENOME018882_00062	GUT_GENOME013049_02008						GUT_GENOME231247_04542		GUT_GENOME082811_00576				GUT_GENOME235147_01472		GUT_GENOME000732_00424	GUT_GENOME000196_00354		GUT_GENOME086272_00667
	GUT_GENOME248256_00127	GUT_GENOME171597_04216		GUT_GENOME141425_01273	GUT_GENOME021831_00440		GUT_GENOME103751_03913	GUT_GENOME000189_02906				GUT_GENOME096170_02025	GUT_GENOME014888_01517	GUT_GENOME098616_01196					GUT_GENOME138139_01599	GUT_GENOME158484_01713		GUT_GENOME037806_01951	GUT_GENOME250728_01934		GUT_GENOME101966_01384		GUT_GENOME023635_01708	GUT_GENOME236194_01358	GUT_GENOME279989_01725		GUT_GENOME142594_02734	GUT_GENOME014039_01018						GUT_GENOME096292_01467		GUT_GENOME096402_00627				GUT_GENOME008975_02121		GUT_GENOME279986_00517	GUT_GENOME283163_00112		GUT_GENOME115357_01156
	GUT_GENOME140320_03778	GUT_GENOME096078_02082		GUT_GENOME095995_01892	GUT_GENOME140270_04234		GUT_GENOME098969_00417	GUT_GENOME133541_02921				GUT_GENOME096174_01648	GUT_GENOME000035_04101	GUT_GENOME131085_00462					GUT_GENOME001635_01923	GUT_GENOME258867_00317		GUT_GENOME022484_00155	GUT_GENOME117139_02299		GUT_GENOME143232_04113		GUT_GENOME230476_00653	GUT_GENOME007443_00539	GUT_GENOME239684_00784		GUT_GENOME181333_00382	GUT_GENOME117334_00365						GUT_GENOME268399_00794		GUT_GENOME145698_02332				GUT_GENOME096473_03585		GUT_GENOME251699_00954	GUT_GENOME096210_01757		GUT_GENOME127776_02370
	GUT_GENOME001139_01000	GUT_GENOME257704_00251		GUT_GENOME279141_01462	GUT_GENOME001870_02889		GUT_GENOME150819_00988	GUT_GENOME098969_00417				GUT_GENOME143484_04043	GUT_GENOME161306_01062	GUT_GENOME000030_01279					GUT_GENOME001506_03525	GUT_GENOME145695_02037		GUT_GENOME000008_00481	GUT_GENOME276352_00489		GUT_GENOME238264_00172		GUT_GENOME251243_00710	GUT_GENOME140043_01170	GUT_GENOME196654_00826		GUT_GENOME001282_01407	GUT_GENOME216424_01159						GUT_GENOME000483_01753		GUT_GENOME147524_01721				GUT_GENOME172932_02787		GUT_GENOME013723_00461	GUT_GENOME096442_03850		GUT_GENOME096259_01979
	GUT_GENOME113217_02128	GUT_GENOME147152_00194		GUT_GENOME000047_01702	GUT_GENOME000568_02051		GUT_GENOME096083_02809	GUT_GENOME150819_00988				GUT_GENOME231299_01094	GUT_GENOME006298_00408	GUT_GENOME096276_01907					GUT_GENOME096256_00697	GUT_GENOME000711_03737		GUT_GENOME253287_00035	GUT_GENOME149706_01660		GUT_GENOME019335_01210		GUT_GENOME215193_00471	GUT_GENOME285485_00784	GUT_GENOME000537_00343		GUT_GENOME283050_02822	GUT_GENOME096020_02856						GUT_GENOME247095_00864		GUT_GENOME174809_01670				GUT_GENOME230645_01434		GUT_GENOME096723_00122	GUT_GENOME024450_01202		GUT_GENOME018964_00044
	GUT_GENOME146003_00976	GUT_GENOME000259_04269		GUT_GENOME239662_01056	GUT_GENOME057822_01195		GUT_GENOME169952_00881	GUT_GENOME016749_00388				GUT_GENOME140299_02389	GUT_GENOME001147_03730	GUT_GENOME096559_00511					GUT_GENOME001417_01841	GUT_GENOME147524_01379		GUT_GENOME009103_01098	GUT_GENOME012637_00867		GUT_GENOME044788_01199		GUT_GENOME096203_03120	GUT_GENOME018964_00162	GUT_GENOME170490_01456		GUT_GENOME237440_02132	GUT_GENOME001870_04381								GUT_GENOME033647_00409				GUT_GENOME096039_00616		GUT_GENOME239280_00147	GUT_GENOME115723_01018		GUT_GENOME096293_00723
	GUT_GENOME038289_01098	GUT_GENOME217585_00917		GUT_GENOME001419_00097	GUT_GENOME147629_01573		GUT_GENOME109620_02882	GUT_GENOME096550_00878				GUT_GENOME140240_04440	GUT_GENOME000513_02104	GUT_GENOME170735_00424					GUT_GENOME153042_01737	GUT_GENOME141284_00873		GUT_GENOME139147_01907	GUT_GENOME105900_02500		GUT_GENOME126719_00438		GUT_GENOME239684_00784	GUT_GENOME017737_00778	GUT_GENOME232194_03332		GUT_GENOME000367_01076	GUT_GENOME096399_02179								GUT_GENOME142057_03116				GUT_GENOME095983_00242		GUT_GENOME236864_00823	GUT_GENOME171359_03927		GUT_GENOME247791_01945
	GUT_GENOME232013_00717	GUT_GENOME086272_01005		GUT_GENOME009523_02030	GUT_GENOME243084_00206		GUT_GENOME097987_01745	GUT_GENOME096083_02809				GUT_GENOME108993_02746	GUT_GENOME244012_00332	GUT_GENOME231453_00459					GUT_GENOME107512_00633	GUT_GENOME239772_00929		GUT_GENOME039172_00827	GUT_GENOME125517_00329		GUT_GENOME115718_00206		GUT_GENOME159262_00406	GUT_GENOME266586_00544	GUT_GENOME141763_01215		GUT_GENOME000047_01759	GUT_GENOME153266_01867								GUT_GENOME125804_00990				GUT_GENOME125783_00172		GUT_GENOME096482_00506	GUT_GENOME158620_01651		GUT_GENOME139147_00064
	GUT_GENOME266127_00998	GUT_GENOME141425_00619		GUT_GENOME096537_00242	GUT_GENOME018782_01408		GUT_GENOME096573_01646	GUT_GENOME109620_02882				GUT_GENOME096191_00824	GUT_GENOME207341_00829	GUT_GENOME148088_01377					GUT_GENOME097946_02379	GUT_GENOME237879_01253		GUT_GENOME286118_01396	GUT_GENOME018576_01305		GUT_GENOME008718_00911		GUT_GENOME022484_00495	GUT_GENOME256155_02640	GUT_GENOME225784_02112		GUT_GENOME098045_00864	GUT_GENOME142592_03724								GUT_GENOME143760_02958				GUT_GENOME000530_00350		GUT_GENOME238494_01998	GUT_GENOME232724_00305		GUT_GENOME034763_00589
	GUT_GENOME082800_00891	GUT_GENOME128042_00933		GUT_GENOME192985_00012	GUT_GENOME263852_00104		GUT_GENOME005654_01854	GUT_GENOME070485_01741				GUT_GENOME143188_01701	GUT_GENOME001677_00124	GUT_GENOME103766_03229					GUT_GENOME143751_03993	GUT_GENOME096244_00934		GUT_GENOME244286_01622	GUT_GENOME285108_01092		GUT_GENOME068725_00289		GUT_GENOME022392_02026	GUT_GENOME113507_00936	GUT_GENOME231309_01196		GUT_GENOME239083_00964	GUT_GENOME220495_01300								GUT_GENOME143752_03058				GUT_GENOME001223_01194		GUT_GENOME156224_01118	GUT_GENOME198850_01478		GUT_GENOME284015_00416
	GUT_GENOME256614_00813	GUT_GENOME248256_00127		GUT_GENOME131073_01744	GUT_GENOME147115_01767		GUT_GENOME229012_00871	GUT_GENOME096573_01646				GUT_GENOME122359_02776	GUT_GENOME006298_00621	GUT_GENOME000483_01968					GUT_GENOME171683_00702	GUT_GENOME017455_00441		GUT_GENOME205174_02033	GUT_GENOME000035_03410		GUT_GENOME269217_01572		GUT_GENOME141436_04515	GUT_GENOME002158_02981	GUT_GENOME143765_01405		GUT_GENOME096543_00125	GUT_GENOME159700_00008								GUT_GENOME147524_02451				GUT_GENOME018425_01371		GUT_GENOME096271_00195	GUT_GENOME138794_00497		GUT_GENOME096170_01652
	GUT_GENOME285322_01139	GUT_GENOME155679_02171		GUT_GENOME006298_01088	GUT_GENOME161213_00147		GUT_GENOME234729_00907	GUT_GENOME005654_01854				GUT_GENOME000187_01731	GUT_GENOME001120_03571	GUT_GENOME006298_00555					GUT_GENOME075103_01704	GUT_GENOME283276_01455		GUT_GENOME014039_01447	GUT_GENOME139879_01738		GUT_GENOME143131_01251		GUT_GENOME000187_00434	GUT_GENOME275347_00477	GUT_GENOME026180_00432		GUT_GENOME000962_01018	GUT_GENOME000479_01534								GUT_GENOME171597_01805				GUT_GENOME046057_00678		GUT_GENOME000030_02638	GUT_GENOME155439_00006		GUT_GENOME143188_01442
	GUT_GENOME143724_03410	GUT_GENOME001139_01000		GUT_GENOME000962_02120	GUT_GENOME127803_01058		GUT_GENOME217236_00242	GUT_GENOME229012_00871				GUT_GENOME096083_01661	GUT_GENOME104344_02064	GUT_GENOME000020_00936					GUT_GENOME283126_02235	GUT_GENOME275347_00820		GUT_GENOME239268_01624	GUT_GENOME102015_00326		GUT_GENOME010933_01477		GUT_GENOME041343_00871	GUT_GENOME160895_00151	GUT_GENOME262768_01396		GUT_GENOME096193_02424	GUT_GENOME096472_02762								GUT_GENOME096402_00237				GUT_GENOME237439_00520		GUT_GENOME140270_00364	GUT_GENOME001274_00587		GUT_GENOME096170_01154
	GUT_GENOME198893_01125	GUT_GENOME143604_00830		GUT_GENOME112399_00088	GUT_GENOME111204_02039		GUT_GENOME096173_00295	GUT_GENOME186046_01022				GUT_GENOME095941_01002	GUT_GENOME248256_01184	GUT_GENOME225259_01598					GUT_GENOME194726_00150	GUT_GENOME096525_01037		GUT_GENOME027390_01432	GUT_GENOME210626_00418		GUT_GENOME040420_00431		GUT_GENOME000122_02513	GUT_GENOME111729_00754	GUT_GENOME145698_01080		GUT_GENOME225144_01050	GUT_GENOME066135_00738								GUT_GENOME275636_01777				GUT_GENOME096372_01205		GUT_GENOME000137_01483	GUT_GENOME133022_00754		GUT_GENOME143514_01525
	GUT_GENOME147115_00097	GUT_GENOME038289_01098		GUT_GENOME000420_01886	GUT_GENOME143746_02232		GUT_GENOME140082_01765	GUT_GENOME253674_00443				GUT_GENOME096489_01828	GUT_GENOME256155_00634	GUT_GENOME145981_02731					GUT_GENOME001261_00217	GUT_GENOME142458_00734		GUT_GENOME122359_01658	GUT_GENOME000655_01331		GUT_GENOME046227_00193		GUT_GENOME087773_00866	GUT_GENOME000196_02350	GUT_GENOME011366_00736		GUT_GENOME038289_00140	GUT_GENOME101260_02795								GUT_GENOME045895_02065				GUT_GENOME001854_02068		GUT_GENOME014162_00781	GUT_GENOME244253_01306		GUT_GENOME096701_00185
	GUT_GENOME275636_00840	GUT_GENOME232013_00717		GUT_GENOME148915_00013	GUT_GENOME095246_00872		GUT_GENOME238994_01495	GUT_GENOME234729_00907				GUT_GENOME001120_02218	GUT_GENOME000122_03278	GUT_GENOME033875_00302					GUT_GENOME022295_02486	GUT_GENOME142610_02222		GUT_GENOME152489_00357	GUT_GENOME149380_00298		GUT_GENOME140082_00236		GUT_GENOME001208_01519	GUT_GENOME152999_02078	GUT_GENOME218496_00610		GUT_GENOME257836_01322	GUT_GENOME096269_00609								GUT_GENOME018318_01250				GUT_GENOME000575_01981		GUT_GENOME225807_00825	GUT_GENOME084610_01648		GUT_GENOME096170_00897
	GUT_GENOME103766_02390	GUT_GENOME231710_02641		GUT_GENOME095186_00176	GUT_GENOME232008_02489		GUT_GENOME134988_01954	GUT_GENOME164334_02095				GUT_GENOME001255_00138	GUT_GENOME095021_00467	GUT_GENOME000109_01620					GUT_GENOME198893_01327	GUT_GENOME236194_01391		GUT_GENOME236194_02133	GUT_GENOME114555_02173		GUT_GENOME253287_00900		GUT_GENOME000285_00315	GUT_GENOME162087_00263	GUT_GENOME084358_00811		GUT_GENOME257069_00164	GUT_GENOME270687_00653								GUT_GENOME140265_00057				GUT_GENOME251721_01390		GUT_GENOME020571_00433	GUT_GENOME095994_01972		GUT_GENOME120773_01727
	GUT_GENOME000604_03511	GUT_GENOME266127_00998		GUT_GENOME000568_00295	GUT_GENOME002382_01175		GUT_GENOME096366_00578	GUT_GENOME217236_00242				GUT_GENOME128042_00810	GUT_GENOME231453_00459	GUT_GENOME096269_02416					GUT_GENOME015763_00562	GUT_GENOME258847_02514		GUT_GENOME247791_00764	GUT_GENOME000583_01414		GUT_GENOME074418_01719		GUT_GENOME143505_01450	GUT_GENOME231920_04489	GUT_GENOME080199_01651		GUT_GENOME006298_01403	GUT_GENOME097975_00163								GUT_GENOME156122_00314				GUT_GENOME138767_02069		GUT_GENOME000996_01144	GUT_GENOME231722_00472		GUT_GENOME125418_01390
	GUT_GENOME143749_02106	GUT_GENOME096559_04789		GUT_GENOME034178_00568	GUT_GENOME124777_00520		GUT_GENOME212871_00170	GUT_GENOME108143_00136				GUT_GENOME095991_00540	GUT_GENOME143484_04043	GUT_GENOME241809_01671					GUT_GENOME176098_00678	GUT_GENOME001309_01576		GUT_GENOME001831_00016	GUT_GENOME229830_02168		GUT_GENOME254659_00099		GUT_GENOME144544_00949	GUT_GENOME278798_00243	GUT_GENOME096501_00008		GUT_GENOME096538_02449	GUT_GENOME121384_00149								GUT_GENOME246915_00824				GUT_GENOME095520_01686		GUT_GENOME096285_01031	GUT_GENOME189835_01096		GUT_GENOME096170_00523
	GUT_GENOME231730_03068	GUT_GENOME096298_03170		GUT_GENOME194589_00787	GUT_GENOME019335_01747		GUT_GENOME096415_01219	GUT_GENOME096173_00295				GUT_GENOME096170_02026	GUT_GENOME261776_01097	GUT_GENOME088630_00655					GUT_GENOME001135_00307	GUT_GENOME011266_01094		GUT_GENOME157463_01279	GUT_GENOME285301_00602		GUT_GENOME205656_02275		GUT_GENOME140826_01966	GUT_GENOME234088_00744	GUT_GENOME260250_00276		GUT_GENOME011515_00508	GUT_GENOME255709_00935								GUT_GENOME231453_03621				GUT_GENOME251583_00266		GUT_GENOME251937_01117	GUT_GENOME143383_03710		GUT_GENOME286625_00405
	GUT_GENOME095599_00287	GUT_GENOME212984_01016		GUT_GENOME247095_02096	GUT_GENOME193403_00355		GUT_GENOME254975_01162	GUT_GENOME140329_01710				GUT_GENOME217674_01791	GUT_GENOME103766_03229	GUT_GENOME250982_00330					GUT_GENOME048143_01995	GUT_GENOME141698_00877		GUT_GENOME000221_03175	GUT_GENOME012681_01307		GUT_GENOME000221_00535		GUT_GENOME096203_03447	GUT_GENOME100339_00572	GUT_GENOME123926_00934		GUT_GENOME000200_01876	GUT_GENOME158633_01173								GUT_GENOME142031_03040				GUT_GENOME237519_00907		GUT_GENOME260250_00489	GUT_GENOME281441_00984		GUT_GENOME120773_01894
	GUT_GENOME141436_02680	GUT_GENOME096559_02831		GUT_GENOME244286_03507	GUT_GENOME224740_01219		GUT_GENOME007443_02757	GUT_GENOME159708_00170				GUT_GENOME103694_02244	GUT_GENOME000483_01968	GUT_GENOME096431_01884					GUT_GENOME095352_01264	GUT_GENOME000022_00508		GUT_GENOME219276_01138	GUT_GENOME141118_02521		GUT_GENOME001324_03039		GUT_GENOME247084_02964	GUT_GENOME207104_00960	GUT_GENOME143407_00682		GUT_GENOME137156_00616	GUT_GENOME000166_03367								GUT_GENOME145378_04296				GUT_GENOME078716_00666		GUT_GENOME000760_00008	GUT_GENOME003665_00230		GUT_GENOME036853_01573
	GUT_GENOME000057_01358	GUT_GENOME128042_00730		GUT_GENOME244205_00722	GUT_GENOME207475_02412		GUT_GENOME009602_01234	GUT_GENOME259567_01383				GUT_GENOME246789_02691	GUT_GENOME006298_00555	GUT_GENOME000031_03112					GUT_GENOME158484_01713	GUT_GENOME095592_04258		GUT_GENOME206574_00903	GUT_GENOME022845_00913		GUT_GENOME258286_01721		GUT_GENOME152489_01103	GUT_GENOME097987_01671	GUT_GENOME096287_01829		GUT_GENOME218104_01436	GUT_GENOME095021_01602								GUT_GENOME143724_01879				GUT_GENOME110705_01105		GUT_GENOME014138_00749	GUT_GENOME113208_01041		GUT_GENOME031782_00535
	GUT_GENOME140826_02176	GUT_GENOME080362_00192		GUT_GENOME000094_01060	GUT_GENOME094468_00707		GUT_GENOME251721_03025	GUT_GENOME238994_01495				GUT_GENOME259135_01405	GUT_GENOME108993_02746	GUT_GENOME001355_02145					GUT_GENOME001147_03140	GUT_GENOME129323_00040		GUT_GENOME096270_02140	GUT_GENOME000133_01109		GUT_GENOME034955_01349		GUT_GENOME237335_02260	GUT_GENOME018344_00342	GUT_GENOME237052_00840		GUT_GENOME207341_00172	GUT_GENOME261579_01236								GUT_GENOME095986_00143				GUT_GENOME096449_02758		GUT_GENOME005153_00321	GUT_GENOME267242_00945		GUT_GENOME128042_01582
	GUT_GENOME143751_01030	GUT_GENOME074418_00556		GUT_GENOME175935_01028	GUT_GENOME104300_00992		GUT_GENOME183079_02273	GUT_GENOME134988_01954				GUT_GENOME113322_02046	GUT_GENOME020577_00658	GUT_GENOME096532_01277					GUT_GENOME277404_02108	GUT_GENOME096562_00478		GUT_GENOME096144_02826	GUT_GENOME139932_00018		GUT_GENOME115838_01419		GUT_GENOME147678_00570	GUT_GENOME229830_02051	GUT_GENOME001738_01221		GUT_GENOME035872_00577	GUT_GENOME001177_03540								GUT_GENOME014491_01614				GUT_GENOME282843_00695		GUT_GENOME151978_01949	GUT_GENOME036763_00227		GUT_GENOME096543_03472
	GUT_GENOME143752_00825	GUT_GENOME200288_05198		GUT_GENOME146009_03369	GUT_GENOME057155_02237		GUT_GENOME000192_02314	GUT_GENOME096366_00578				GUT_GENOME000221_02635	GUT_GENOME000109_01620	GUT_GENOME017828_00470					GUT_GENOME212287_00510	GUT_GENOME014048_00566		GUT_GENOME274372_01942	GUT_GENOME096542_00970		GUT_GENOME000189_02391		GUT_GENOME239789_04789	GUT_GENOME276125_02038	GUT_GENOME186342_01597		GUT_GENOME207662_00653	GUT_GENOME268665_00377								GUT_GENOME090533_02136				GUT_GENOME261291_00108		GUT_GENOME096435_02019	GUT_GENOME096178_01369		GUT_GENOME225259_01626
	GUT_GENOME227151_00705	GUT_GENOME140270_01115		GUT_GENOME000057_01384	GUT_GENOME000980_00398		GUT_GENOME243200_00193	GUT_GENOME140603_00358				GUT_GENOME218891_00832	GUT_GENOME225259_01598	GUT_GENOME145378_03478					GUT_GENOME145695_02037	GUT_GENOME140601_01698		GUT_GENOME002158_03763	GUT_GENOME045186_02799		GUT_GENOME095979_03347		GUT_GENOME044204_02143	GUT_GENOME253114_01039	GUT_GENOME142419_02886		GUT_GENOME019023_00506	GUT_GENOME147149_01456								GUT_GENOME001354_00872				GUT_GENOME096393_01916		GUT_GENOME095021_00678	GUT_GENOME000558_00793		GUT_GENOME045895_01488
	GUT_GENOME268665_01821	GUT_GENOME141371_01936		GUT_GENOME096294_05092	GUT_GENOME246461_01050		GUT_GENOME171356_04387	GUT_GENOME001416_01396				GUT_GENOME000166_00176	GUT_GENOME118058_00481	GUT_GENOME141089_01573					GUT_GENOME212278_01431	GUT_GENOME033647_01258		GUT_GENOME001255_04282	GUT_GENOME108993_00896		GUT_GENOME274362_01139		GUT_GENOME000008_01254	GUT_GENOME121215_01368	GUT_GENOME258258_00622		GUT_GENOME237779_00640	GUT_GENOME035512_00457								GUT_GENOME191958_00272				GUT_GENOME242942_01126		GUT_GENOME116219_01709	GUT_GENOME282991_02198		GUT_GENOME045895_00748
	GUT_GENOME207512_01336	GUT_GENOME188428_01832		GUT_GENOME268665_01280	GUT_GENOME000266_02750		GUT_GENOME000563_03245	GUT_GENOME095994_00534				GUT_GENOME001255_03080	GUT_GENOME229830_02100	GUT_GENOME143711_00809					GUT_GENOME147524_01379	GUT_GENOME151017_00126		GUT_GENOME227559_01096	GUT_GENOME098568_03037		GUT_GENOME246951_00638		GUT_GENOME260956_01010	GUT_GENOME239674_00844	GUT_GENOME146008_03367		GUT_GENOME155166_00415	GUT_GENOME226406_02051								GUT_GENOME244286_01144				GUT_GENOME285666_01232		GUT_GENOME268486_00837	GUT_GENOME277515_01194		GUT_GENOME019103_01063
	GUT_GENOME171597_04417	GUT_GENOME141371_01715		GUT_GENOME217508_01449	GUT_GENOME092065_03241		GUT_GENOME254013_01754	GUT_GENOME096415_01219				GUT_GENOME255109_00384	GUT_GENOME000187_01731	GUT_GENOME201393_00877					GUT_GENOME239772_00929	GUT_GENOME096283_01087		GUT_GENOME239789_00691	GUT_GENOME159262_03030		GUT_GENOME260703_00207		GUT_GENOME143484_00161	GUT_GENOME147542_00692	GUT_GENOME096506_03618		GUT_GENOME039567_02208	GUT_GENOME001135_00724								GUT_GENOME000166_00466				GUT_GENOME000020_02325		GUT_GENOME143407_00305	GUT_GENOME059442_00345		GUT_GENOME000941_00327
	GUT_GENOME005404_00705	GUT_GENOME148088_00359		GUT_GENOME231320_01500	GUT_GENOME096473_04676		GUT_GENOME140393_01956	GUT_GENOME117154_00486				GUT_GENOME147612_00699	GUT_GENOME057155_00291	GUT_GENOME239268_01880					GUT_GENOME237879_01253	GUT_GENOME285651_00120		GUT_GENOME095991_01848	GUT_GENOME009103_01661		GUT_GENOME118160_00226		GUT_GENOME000122_03404	GUT_GENOME002080_00087	GUT_GENOME147598_01410		GUT_GENOME000192_00691	GUT_GENOME017790_01211								GUT_GENOME143361_01816				GUT_GENOME018678_01326		GUT_GENOME212278_00887	GUT_GENOME095939_02173		GUT_GENOME275636_01155
	GUT_GENOME000595_01083	GUT_GENOME182311_01731		GUT_GENOME091736_01121	GUT_GENOME176758_01817		GUT_GENOME125250_00059	GUT_GENOME007443_02757				GUT_GENOME286320_00527	GUT_GENOME027270_00031	GUT_GENOME225784_00106					GUT_GENOME219276_01815	GUT_GENOME020805_00865		GUT_GENOME237201_01162	GUT_GENOME238262_01246		GUT_GENOME112859_00873		GUT_GENOME095941_00684	GUT_GENOME198893_01359	GUT_GENOME238206_00162		GUT_GENOME047636_00543	GUT_GENOME256412_00751								GUT_GENOME098775_01200				GUT_GENOME113507_01330		GUT_GENOME274692_00906	GUT_GENOME096096_00192		GUT_GENOME275636_00823
	GUT_GENOME001575_01140	GUT_GENOME095247_01237		GUT_GENOME236239_00401	GUT_GENOME140245_01554		GUT_GENOME216778_01957	GUT_GENOME237201_00673				GUT_GENOME001471_02683	GUT_GENOME001213_00497	GUT_GENOME000784_01342					GUT_GENOME266586_01820	GUT_GENOME146003_01071		GUT_GENOME233275_01399	GUT_GENOME092106_01442		GUT_GENOME009558_01319		GUT_GENOME155713_00694	GUT_GENOME244286_00211	GUT_GENOME017737_01784		GUT_GENOME143496_03014	GUT_GENOME135207_00507								GUT_GENOME158649_01051				GUT_GENOME169940_00667		GUT_GENOME095001_01707	GUT_GENOME130010_00327		GUT_GENOME000559_00743
	GUT_GENOME000682_00949	GUT_GENOME232192_02817		GUT_GENOME147524_04263	GUT_GENOME144544_03267		GUT_GENOME239662_01087	GUT_GENOME268596_01283				GUT_GENOME044204_01421	GUT_GENOME096213_01286	GUT_GENOME210386_00591					GUT_GENOME219449_01275	GUT_GENOME155926_01666		GUT_GENOME236879_00802	GUT_GENOME023798_01401		GUT_GENOME097844_01555		GUT_GENOME115935_01080	GUT_GENOME156119_00812	GUT_GENOME095247_02690		GUT_GENOME090740_00163	GUT_GENOME233517_01757								GUT_GENOME095520_00604				GUT_GENOME125765_01405		GUT_GENOME250728_00265	GUT_GENOME017790_01344		GUT_GENOME096276_01151
	GUT_GENOME000094_01282	GUT_GENOME140246_03817		GUT_GENOME141675_00895	GUT_GENOME143726_02323		GUT_GENOME261579_01989	GUT_GENOME256509_00354				GUT_GENOME096080_03262	GUT_GENOME113217_01395	GUT_GENOME096270_04241					GUT_GENOME182311_01910	GUT_GENOME145980_01233		GUT_GENOME113527_00543	GUT_GENOME141436_05080		GUT_GENOME095991_01767		GUT_GENOME096298_01495	GUT_GENOME141414_00124	GUT_GENOME143383_05961		GUT_GENOME018983_00131	GUT_GENOME140345_02676								GUT_GENOME096246_03260				GUT_GENOME263846_00654		GUT_GENOME252307_00335	GUT_GENOME000724_02752		GUT_GENOME260051_01193
	GUT_GENOME001417_03707	GUT_GENOME117139_00918		GUT_GENOME140076_05120	GUT_GENOME007974_00879		GUT_GENOME117758_01371	GUT_GENOME183079_02273				GUT_GENOME143232_01871	GUT_GENOME017828_00470	GUT_GENOME231812_00033					GUT_GENOME001270_03695	GUT_GENOME016749_01108		GUT_GENOME133541_00299	GUT_GENOME143727_02843		GUT_GENOME096511_00696		GUT_GENOME246461_01086	GUT_GENOME207895_00259	GUT_GENOME096536_01037		GUT_GENOME143525_02627	GUT_GENOME083197_01422								GUT_GENOME094660_00337				GUT_GENOME245362_00092		GUT_GENOME255999_02539	GUT_GENOME171536_00760		GUT_GENOME141436_03114
	GUT_GENOME176629_00910	GUT_GENOME232302_00703		GUT_GENOME188619_00770	GUT_GENOME123310_01444		GUT_GENOME236892_00604	GUT_GENOME237433_00559				GUT_GENOME108259_01977	GUT_GENOME017455_01416	GUT_GENOME096168_00114					GUT_GENOME143131_00632	GUT_GENOME143527_03594		GUT_GENOME096556_00667	GUT_GENOME001177_01416		GUT_GENOME142628_01278		GUT_GENOME000231_01587	GUT_GENOME003176_00924	GUT_GENOME080362_01167		GUT_GENOME143740_03892	GUT_GENOME150819_00988								GUT_GENOME001354_00288				GUT_GENOME247624_00607		GUT_GENOME261061_01598	GUT_GENOME001135_01276		GUT_GENOME036853_01445
	GUT_GENOME144544_00650	GUT_GENOME232008_01478		GUT_GENOME285815_01978	GUT_GENOME096493_00296		GUT_GENOME218104_01436	GUT_GENOME143282_00818				GUT_GENOME000513_04040	GUT_GENOME128273_00280	GUT_GENOME231247_00876					GUT_GENOME000192_00007	GUT_GENOME000565_01587		GUT_GENOME010023_00175	GUT_GENOME247475_02104		GUT_GENOME253078_00723		GUT_GENOME218891_01688	GUT_GENOME253356_01029	GUT_GENOME277044_00586		GUT_GENOME211901_03679	GUT_GENOME007693_01025								GUT_GENOME195667_01435				GUT_GENOME000106_00685		GUT_GENOME003176_01137	GUT_GENOME096543_01655		GUT_GENOME096170_01635
	GUT_GENOME149380_01095	GUT_GENOME227151_00705		GUT_GENOME096166_03224	GUT_GENOME141425_01859		GUT_GENOME207884_00401	GUT_GENOME243200_00193				GUT_GENOME001190_00271	GUT_GENOME145378_03478	GUT_GENOME022794_00107					GUT_GENOME171392_00371	GUT_GENOME096239_00236		GUT_GENOME239728_03029	GUT_GENOME113868_00842		GUT_GENOME000682_01546		GUT_GENOME147525_01771	GUT_GENOME000221_00483	GUT_GENOME045630_00343		GUT_GENOME156244_01452	GUT_GENOME096049_00093								GUT_GENOME248086_00642				GUT_GENOME001270_03718		GUT_GENOME008492_01120	GUT_GENOME221922_00509		GUT_GENOME042029_01265
	GUT_GENOME143156_00186	GUT_GENOME143747_02351		GUT_GENOME098572_03420	GUT_GENOME208036_00544		GUT_GENOME254213_01852	GUT_GENOME235154_01183				GUT_GENOME000655_03760	GUT_GENOME001120_02218	GUT_GENOME096393_02529					GUT_GENOME096168_01579	GUT_GENOME143726_00832		GUT_GENOME147542_02892	GUT_GENOME253065_01191		GUT_GENOME096294_00142		GUT_GENOME113687_01298	GUT_GENOME066938_01092	GUT_GENOME171367_00336		GUT_GENOME096206_00992	GUT_GENOME096557_01772								GUT_GENOME142457_00763				GUT_GENOME000509_00531		GUT_GENOME141187_02461	GUT_GENOME103710_01870		GUT_GENOME143092_02118
	GUT_GENOME017828_01739	GUT_GENOME000711_03683		GUT_GENOME283050_01707	GUT_GENOME065321_01347		GUT_GENOME000513_00197	GUT_GENOME140411_02643				GUT_GENOME001745_03461	GUT_GENOME142031_02646	GUT_GENOME115419_00290					GUT_GENOME256155_01520	GUT_GENOME019023_00082		GUT_GENOME069124_01838	GUT_GENOME158963_00647		GUT_GENOME143484_03765		GUT_GENOME044788_00969	GUT_GENOME231559_03305	GUT_GENOME268227_01740		GUT_GENOME024543_02233	GUT_GENOME286887_01135								GUT_GENOME095995_03219				GUT_GENOME141586_00349		GUT_GENOME000575_02671	GUT_GENOME140604_00839		GUT_GENOME231247_02779
	GUT_GENOME001416_01172	GUT_GENOME096189_05314		GUT_GENOME096546_01644	GUT_GENOME141425_04874		GUT_GENOME096380_00272	GUT_GENOME254013_01754				GUT_GENOME000192_00007	GUT_GENOME143711_00809	GUT_GENOME098791_01234					GUT_GENOME271908_01826	GUT_GENOME157873_01421		GUT_GENOME000735_02309	GUT_GENOME063562_00396		GUT_GENOME252875_00397		GUT_GENOME140076_03791	GUT_GENOME196669_00870	GUT_GENOME212654_01070		GUT_GENOME117166_00484	GUT_GENOME020805_00157								GUT_GENOME147673_02726				GUT_GENOME031710_01407		GUT_GENOME096253_01086	GUT_GENOME236238_00671		GUT_GENOME260051_01273
	GUT_GENOME176758_00472	GUT_GENOME207512_01336		GUT_GENOME234391_00005	GUT_GENOME258247_00937		GUT_GENOME101082_02942	GUT_GENOME274350_01159				GUT_GENOME095991_02860	GUT_GENOME121220_00284	GUT_GENOME150050_01023					GUT_GENOME212278_01486	GUT_GENOME207259_02965		GUT_GENOME143190_00600	GUT_GENOME265497_00407		GUT_GENOME103079_01784		GUT_GENOME096203_03740	GUT_GENOME273451_00382	GUT_GENOME213384_04644		GUT_GENOME143727_03019	GUT_GENOME001471_02607								GUT_GENOME140233_03118				GUT_GENOME096539_01650		GUT_GENOME251930_00234	GUT_GENOME221057_01829		GUT_GENOME275636_01164
	GUT_GENOME260489_01385	GUT_GENOME007443_02471		GUT_GENOME096078_02324	GUT_GENOME106118_01155		GUT_GENOME001341_00998	GUT_GENOME139849_00506				GUT_GENOME116258_00232	GUT_GENOME268758_00736	GUT_GENOME000711_02982					GUT_GENOME283627_00075	GUT_GENOME141734_02277		GUT_GENOME097684_03529	GUT_GENOME096291_01065		GUT_GENOME096185_00457		GUT_GENOME246421_02152	GUT_GENOME140076_04450	GUT_GENOME125769_01277		GUT_GENOME255646_01108	GUT_GENOME081328_00850								GUT_GENOME014491_00669				GUT_GENOME230891_00760		GUT_GENOME095967_01395	GUT_GENOME096539_01487		GUT_GENOME139132_00688
	GUT_GENOME082800_00537	GUT_GENOME096384_04120		GUT_GENOME108259_00325	GUT_GENOME042573_01161		GUT_GENOME153042_01173	GUT_GENOME239662_01087				GUT_GENOME000655_02458	GUT_GENOME284658_00998	GUT_GENOME241809_01563					GUT_GENOME095186_00273	GUT_GENOME078716_00274		GUT_GENOME000906_03176	GUT_GENOME250360_00952		GUT_GENOME108492_02143		GUT_GENOME155674_00131	GUT_GENOME110705_01324	GUT_GENOME117154_00555		GUT_GENOME209802_01457	GUT_GENOME062339_00145								GUT_GENOME019330_00686				GUT_GENOME057686_01888		GUT_GENOME147523_01023	GUT_GENOME189606_00157		GUT_GENOME001354_01395
	GUT_GENOME095995_03265	GUT_GENOME096560_03875		GUT_GENOME100192_01649	GUT_GENOME201873_00031		GUT_GENOME096562_03636	GUT_GENOME261579_01989				GUT_GENOME239663_03176	GUT_GENOME065630_01200	GUT_GENOME142591_01191					GUT_GENOME156655_01528	GUT_GENOME141187_01166		GUT_GENOME253072_02676	GUT_GENOME081297_00244		GUT_GENOME007607_01555		GUT_GENOME001189_00060	GUT_GENOME270687_00324	GUT_GENOME096381_03935		GUT_GENOME000634_00362	GUT_GENOME266139_01217								GUT_GENOME172932_00059				GUT_GENOME035907_00739		GUT_GENOME023591_00431	GUT_GENOME103713_02929		GUT_GENOME246915_00947
	GUT_GENOME151605_01543	GUT_GENOME096562_01753		GUT_GENOME253970_02547	GUT_GENOME205748_00595		GUT_GENOME001417_01320	GUT_GENOME096372_01715				GUT_GENOME018882_01975	GUT_GENOME225784_00106	GUT_GENOME000338_01088					GUT_GENOME212278_00807	GUT_GENOME000595_02871		GUT_GENOME236194_01630	GUT_GENOME239663_00098		GUT_GENOME258286_01363		GUT_GENOME201325_02143	GUT_GENOME127360_00447	GUT_GENOME013993_01392		GUT_GENOME243826_01738	GUT_GENOME253674_00443								GUT_GENOME000565_01257				GUT_GENOME175577_01835		GUT_GENOME239538_02047	GUT_GENOME092528_02297		GUT_GENOME157191_01921
	GUT_GENOME138841_01889	GUT_GENOME005404_00705		GUT_GENOME285123_01587	GUT_GENOME244330_02118		GUT_GENOME096080_01668	GUT_GENOME236892_00604				GUT_GENOME000122_00401	GUT_GENOME284343_00012	GUT_GENOME095944_00377					GUT_GENOME283627_00454	GUT_GENOME149706_00686		GUT_GENOME145985_02154	GUT_GENOME096530_01026		GUT_GENOME236194_01594		GUT_GENOME001341_00293	GUT_GENOME001341_02116	GUT_GENOME286625_00304		GUT_GENOME244286_01290	GUT_GENOME001355_00987								GUT_GENOME260051_01807				GUT_GENOME017612_00434		GUT_GENOME157951_00312	GUT_GENOME018882_00367		GUT_GENOME260051_00743
	GUT_GENOME193231_00976	GUT_GENOME141005_01927		GUT_GENOME098568_02478	GUT_GENOME142457_03628		GUT_GENOME143723_02886	GUT_GENOME207884_00401				GUT_GENOME144544_01155	GUT_GENOME246789_02691	GUT_GENOME001490_00880					GUT_GENOME122359_03231	GUT_GENOME142596_01603		GUT_GENOME019095_02074	GUT_GENOME011049_00387		GUT_GENOME246421_01378		GUT_GENOME101636_01409	GUT_GENOME260664_01613	GUT_GENOME143096_00013		GUT_GENOME176758_00540	GUT_GENOME215504_00262								GUT_GENOME143723_01654				GUT_GENOME140315_00774		GUT_GENOME207914_02439	GUT_GENOME121515_00163		GUT_GENOME268227_01011
	GUT_GENOME239799_01211	GUT_GENOME232315_01090		GUT_GENOME231626_04081	GUT_GENOME123860_00303		GUT_GENOME109102_01272	GUT_GENOME000513_00197				GUT_GENOME219438_03655	GUT_GENOME096420_01316	GUT_GENOME127408_00700					GUT_GENOME141397_00162	GUT_GENOME125418_00368		GUT_GENOME094995_01782	GUT_GENOME000629_01341		GUT_GENOME096556_02493		GUT_GENOME000187_02283	GUT_GENOME093609_00193	GUT_GENOME095250_01467		GUT_GENOME096210_00465	GUT_GENOME273237_00279								GUT_GENOME036853_01991				GUT_GENOME245660_00481		GUT_GENOME103712_00235	GUT_GENOME172926_00281		GUT_GENOME260051_01135
	GUT_GENOME098768_00598	GUT_GENOME000094_01282		GUT_GENOME264873_02209	GUT_GENOME100276_01947		GUT_GENOME239747_02027	GUT_GENOME096380_00272				GUT_GENOME096473_03586	GUT_GENOME000554_02310	GUT_GENOME140270_00991					GUT_GENOME029877_02044	GUT_GENOME254562_01523		GUT_GENOME237866_00821	GUT_GENOME235149_01006		GUT_GENOME271908_00244		GUT_GENOME116258_01321	GUT_GENOME117139_00504	GUT_GENOME036651_01429		GUT_GENOME103762_00976	GUT_GENOME172958_00784								GUT_GENOME179059_00113				GUT_GENOME242764_00829		GUT_GENOME253903_02367	GUT_GENOME281389_00410		GUT_GENOME286625_01376
	GUT_GENOME226406_02036	GUT_GENOME143740_00517		GUT_GENOME000852_02913	GUT_GENOME104146_00823		GUT_GENOME103766_04153	GUT_GENOME101082_02942				GUT_GENOME075103_01922	GUT_GENOME231247_00876	GUT_GENOME143747_01326					GUT_GENOME106027_01214	GUT_GENOME140053_03178		GUT_GENOME000963_00207	GUT_GENOME001120_01855		GUT_GENOME126312_00601		GUT_GENOME000122_00150	GUT_GENOME160895_00706	GUT_GENOME096036_02495		GUT_GENOME095996_00080	GUT_GENOME141220_00456								GUT_GENOME001677_01814				GUT_GENOME115597_00367		GUT_GENOME139147_01171	GUT_GENOME193535_00008		GUT_GENOME246915_01050
	GUT_GENOME143489_00301	GUT_GENOME103868_03263		GUT_GENOME128145_00633	GUT_GENOME140352_01282		GUT_GENOME022484_03745	GUT_GENOME001341_00998				GUT_GENOME143211_01387	GUT_GENOME231966_01582	GUT_GENOME143483_02005					GUT_GENOME001745_00446	GUT_GENOME143137_03044		GUT_GENOME069755_01983	GUT_GENOME098909_01588		GUT_GENOME246421_01148		GUT_GENOME234570_00230	GUT_GENOME000677_02381	GUT_GENOME142490_02184		GUT_GENOME102790_00382	GUT_GENOME159708_00170								GUT_GENOME256176_01192				GUT_GENOME001147_01525		GUT_GENOME248256_01886	GUT_GENOME282790_00996		GUT_GENOME171597_03288
	GUT_GENOME194726_00023	GUT_GENOME000104_00881		GUT_GENOME140278_03087	GUT_GENOME016749_00932		GUT_GENOME110705_00599	GUT_GENOME153042_01173				GUT_GENOME022484_01737	GUT_GENOME001270_01253	GUT_GENOME116258_00232					GUT_GENOME095352_00830	GUT_GENOME143723_00584		GUT_GENOME001297_01515	GUT_GENOME100192_01723		GUT_GENOME029877_00102		GUT_GENOME118144_00712	GUT_GENOME280428_01377	GUT_GENOME200288_05718		GUT_GENOME207399_01550	GUT_GENOME045846_01235								GUT_GENOME143346_00937				GUT_GENOME116807_00311		GUT_GENOME112794_00818	GUT_GENOME150801_00915		GUT_GENOME017205_01525
	GUT_GENOME009602_00183	GUT_GENOME000245_00702		GUT_GENOME060514_00424	GUT_GENOME267277_01309		GUT_GENOME276091_00508	GUT_GENOME096562_03636				GUT_GENOME143190_00142	GUT_GENOME142525_01794	GUT_GENOME243885_00313					GUT_GENOME047123_01417	GUT_GENOME146008_03697		GUT_GENOME096294_03621	GUT_GENOME139262_01868		GUT_GENOME250809_00793		GUT_GENOME175554_01300	GUT_GENOME000122_00490	GUT_GENOME096300_02760		GUT_GENOME082534_00474	GUT_GENOME000432_00343								GUT_GENOME115357_00939				GUT_GENOME236888_00380		GUT_GENOME092065_01229	GUT_GENOME155726_00345		GUT_GENOME120773_00941
	GUT_GENOME245730_00761	GUT_GENOME140246_02052		GUT_GENOME272566_01571	GUT_GENOME141187_02004		GUT_GENOME000221_03642	GUT_GENOME096080_01668				GUT_GENOME095971_01522	GUT_GENOME115419_00290	GUT_GENOME095995_04100					GUT_GENOME001488_00558	GUT_GENOME140337_02083		GUT_GENOME236874_02057	GUT_GENOME122359_00740		GUT_GENOME253356_01965		GUT_GENOME259822_00937	GUT_GENOME140340_00228	GUT_GENOME148443_01135		GUT_GENOME084358_00282	GUT_GENOME006546_00345								GUT_GENOME018678_01572				GUT_GENOME103727_03241		GUT_GENOME095980_00058	GUT_GENOME156063_00841		GUT_GENOME155439_01465
	GUT_GENOME211264_00667	GUT_GENOME096256_01828		GUT_GENOME140245_00486	GUT_GENOME103727_01381		GUT_GENOME171536_00766	GUT_GENOME258161_00874				GUT_GENOME000008_00844	GUT_GENOME207866_00103	GUT_GENOME096513_04595					GUT_GENOME155913_00588	GUT_GENOME098242_01194		GUT_GENOME120040_01026	GUT_GENOME096385_00341		GUT_GENOME118228_01069		GUT_GENOME215224_01324	GUT_GENOME179941_00494	GUT_GENOME140053_02339		GUT_GENOME000676_02346	GUT_GENOME134988_01954								GUT_GENOME096099_01061						GUT_GENOME145982_01740	GUT_GENOME103868_01785		GUT_GENOME001354_00522
	GUT_GENOME200047_01092	GUT_GENOME176758_00472		GUT_GENOME140104_02661	GUT_GENOME129046_00602		GUT_GENOME091736_00398	GUT_GENOME286118_00847				GUT_GENOME096276_00151	GUT_GENOME150050_01023	GUT_GENOME000518_03157					GUT_GENOME263950_01387	GUT_GENOME024514_00080		GUT_GENOME025653_01523	GUT_GENOME060023_00868		GUT_GENOME283113_00939		GUT_GENOME156244_01593	GUT_GENOME044788_01943	GUT_GENOME143156_00981		GUT_GENOME095021_00684	GUT_GENOME261538_00444								GUT_GENOME210225_01197						GUT_GENOME096560_03189	GUT_GENOME258823_01137		GUT_GENOME230476_01027
	GUT_GENOME018318_00319	GUT_GENOME143751_03457		GUT_GENOME000594_01371	GUT_GENOME208036_03008		GUT_GENOME246181_00214	GUT_GENOME109102_01272				GUT_GENOME133541_00422	GUT_GENOME122988_01745	GUT_GENOME096574_00703					GUT_GENOME253287_03399	GUT_GENOME000729_04732		GUT_GENOME000133_02705	GUT_GENOME110705_00011		GUT_GENOME254647_01905		GUT_GENOME253356_02277	GUT_GENOME095995_03106	GUT_GENOME008080_01822		GUT_GENOME158068_01127	GUT_GENOME142591_02740								GUT_GENOME142612_03139						GUT_GENOME244012_01067	GUT_GENOME283193_00324		GUT_GENOME246008_01560
	GUT_GENOME141809_02192	GUT_GENOME111729_01381		GUT_GENOME233270_04403	GUT_GENOME011213_00821		GUT_GENOME147525_03594	GUT_GENOME239747_02027				GUT_GENOME118228_02604	GUT_GENOME233273_01770	GUT_GENOME108274_01184					GUT_GENOME101636_00512	GUT_GENOME000677_00547		GUT_GENOME000565_04368	GUT_GENOME096819_00091		GUT_GENOME115935_02233		GUT_GENOME143484_04243	GUT_GENOME192690_01343	GUT_GENOME083985_00145		GUT_GENOME237446_00461	GUT_GENOME112419_01216								GUT_GENOME143498_01495						GUT_GENOME283126_01246	GUT_GENOME260425_01429		GUT_GENOME018964_01830
	GUT_GENOME262257_00724	GUT_GENOME175326_01802		GUT_GENOME120636_00656	GUT_GENOME096078_02695		GUT_GENOME253083_00083	GUT_GENOME096222_02331				GUT_GENOME143190_02562	GUT_GENOME174135_00022	GUT_GENOME040960_00984					GUT_GENOME020805_00865	GUT_GENOME152800_00647		GUT_GENOME108993_00497	GUT_GENOME139744_02063		GUT_GENOME126659_01301		GUT_GENOME096185_02054	GUT_GENOME143633_04149	GUT_GENOME005683_00949		GUT_GENOME143746_04058	GUT_GENOME026742_00595								GUT_GENOME015816_01051						GUT_GENOME025676_00979	GUT_GENOME140603_01552		GUT_GENOME143746_01694
	GUT_GENOME143711_03535	GUT_GENOME001417_03736		GUT_GENOME246789_01614	GUT_GENOME189606_02078		GUT_GENOME254490_00355	GUT_GENOME125765_01998				GUT_GENOME111543_01618	GUT_GENOME143157_01223	GUT_GENOME141005_00988					GUT_GENOME155926_01666	GUT_GENOME001376_00319		GUT_GENOME283137_00657	GUT_GENOME007470_01540		GUT_GENOME002158_01856		GUT_GENOME255303_01940	GUT_GENOME001432_01554	GUT_GENOME001422_00149		GUT_GENOME013049_02008	GUT_GENOME258969_01392								GUT_GENOME220136_01653						GUT_GENOME096380_00278	GUT_GENOME261530_01073		GUT_GENOME194902_01558
	GUT_GENOME096244_00437	GUT_GENOME243084_02677		GUT_GENOME143527_01700	GUT_GENOME254699_00652		GUT_GENOME237842_00141	GUT_GENOME022484_03745				GUT_GENOME247421_00106	GUT_GENOME145698_01980	GUT_GENOME096527_02088					GUT_GENOME001274_01965	GUT_GENOME177471_01750		GUT_GENOME113426_01905	GUT_GENOME024079_01446		GUT_GENOME259841_00784		GUT_GENOME148443_01135	GUT_GENOME096534_00133	GUT_GENOME208002_00448		GUT_GENOME014039_01018	GUT_GENOME103694_00229								GUT_GENOME096259_00820						GUT_GENOME092829_00572	GUT_GENOME141727_02196		GUT_GENOME000057_00249
	GUT_GENOME014555_00354	GUT_GENOME082800_00537		GUT_GENOME091116_00641	GUT_GENOME024712_01362		GUT_GENOME095879_00519	GUT_GENOME110705_00599				GUT_GENOME001341_00807	GUT_GENOME001159_03267	GUT_GENOME003966_01307					GUT_GENOME239662_00476	GUT_GENOME231559_02201		GUT_GENOME096292_02151	GUT_GENOME247421_00758		GUT_GENOME000187_02220		GUT_GENOME068461_00505	GUT_GENOME284003_00887	GUT_GENOME207903_01185		GUT_GENOME192985_01780	GUT_GENOME098792_01552								GUT_GENOME096246_02653						GUT_GENOME096564_01643	GUT_GENOME147522_02496		GUT_GENOME280620_00075
	GUT_GENOME232008_03971	GUT_GENOME103712_03560		GUT_GENOME212260_03274	GUT_GENOME005405_01399		GUT_GENOME258758_01408	GUT_GENOME276091_00508				GUT_GENOME115272_00306	GUT_GENOME259535_01654	GUT_GENOME146009_02597					GUT_GENOME001471_01603	GUT_GENOME283183_01342		GUT_GENOME209092_01739	GUT_GENOME001120_02618		GUT_GENOME000035_03761		GUT_GENOME096203_01820	GUT_GENOME273734_01499	GUT_GENOME197012_01415		GUT_GENOME133538_00744	GUT_GENOME000727_00891								GUT_GENOME147115_01031						GUT_GENOME137688_01001	GUT_GENOME096532_02752		GUT_GENOME260051_01844
	GUT_GENOME143726_01501	GUT_GENOME178919_03031		GUT_GENOME019200_01815	GUT_GENOME246802_00161		GUT_GENOME239728_01613	GUT_GENOME201325_01193				GUT_GENOME239684_02163	GUT_GENOME044204_01421	GUT_GENOME277334_01625					GUT_GENOME095850_01628	GUT_GENOME141371_02676		GUT_GENOME000192_03610	GUT_GENOME092829_01667		GUT_GENOME206071_00252		GUT_GENOME117621_01889	GUT_GENOME000152_01424	GUT_GENOME231806_03122		GUT_GENOME042029_00709	GUT_GENOME283627_02279								GUT_GENOME143408_02375						GUT_GENOME146008_00391	GUT_GENOME096257_00723		GUT_GENOME017205_01166
	GUT_GENOME145698_02888	GUT_GENOME141727_03177		GUT_GENOME145378_02950	GUT_GENOME142485_01743		GUT_GENOME208504_00304	GUT_GENOME000221_03642				GUT_GENOME143232_01641	GUT_GENOME001490_00880	GUT_GENOME259797_01935					GUT_GENOME095979_01736	GUT_GENOME017205_00465		GUT_GENOME096366_01612	GUT_GENOME000496_00517		GUT_GENOME150050_02209		GUT_GENOME286887_01055	GUT_GENOME000563_00621	GUT_GENOME096560_01872		GUT_GENOME208213_00603	GUT_GENOME103893_01167								GUT_GENOME096462_02336						GUT_GENOME001638_00261	GUT_GENOME089306_00118		GUT_GENOME001354_00993
	GUT_GENOME231559_03205	GUT_GENOME239799_01211		GUT_GENOME142418_02983	GUT_GENOME250990_00581		GUT_GENOME156886_02453	GUT_GENOME171536_00766				GUT_GENOME216778_01195	GUT_GENOME143747_01326	GUT_GENOME110568_00290					GUT_GENOME274349_00901	GUT_GENOME237865_01762		GUT_GENOME237842_00594	GUT_GENOME037806_01951		GUT_GENOME147854_00752		GUT_GENOME140299_00761	GUT_GENOME095707_00714	GUT_GENOME164334_02846		GUT_GENOME096020_02856	GUT_GENOME095973_02465								GUT_GENOME143379_03906						GUT_GENOME147138_00722	GUT_GENOME254516_00436		GUT_GENOME000092_01336
	GUT_GENOME231257_03352	GUT_GENOME142610_03404		GUT_GENOME119503_00410	GUT_GENOME208036_02243		GUT_GENOME171359_01228	GUT_GENOME091736_00398				GUT_GENOME000231_00468	GUT_GENOME007573_01360	GUT_GENOME253435_00330					GUT_GENOME143505_02069	GUT_GENOME210710_01834		GUT_GENOME001877_02831	GUT_GENOME022484_00155		GUT_GENOME007443_00096		GUT_GENOME102353_02392	GUT_GENOME001800_01292	GUT_GENOME096541_02824		GUT_GENOME085305_02188	GUT_GENOME117154_00486								GUT_GENOME220136_01865						GUT_GENOME272420_00922	GUT_GENOME222400_00864		GUT_GENOME120773_01680
	GUT_GENOME000483_03802	GUT_GENOME098768_00598		GUT_GENOME166968_01656	GUT_GENOME130774_00864		GUT_GENOME109093_00430	GUT_GENOME253083_00083				GUT_GENOME096203_04869	GUT_GENOME000231_03544	GUT_GENOME243814_01189					GUT_GENOME262768_00063	GUT_GENOME146010_05233		GUT_GENOME143724_01704	GUT_GENOME158639_00972		GUT_GENOME182311_00741		GUT_GENOME142031_02806	GUT_GENOME271118_01620	GUT_GENOME096273_00813		GUT_GENOME096424_02257	GUT_GENOME143137_01066								GUT_GENOME171356_03539						GUT_GENOME156969_00922	GUT_GENOME022908_01783		GUT_GENOME170652_00692
		GUT_GENOME143749_02139		GUT_GENOME000595_04498	GUT_GENOME001135_03890		GUT_GENOME155726_00956	GUT_GENOME254490_00355				GUT_GENOME126719_01184	GUT_GENOME219438_01281	GUT_GENOME000057_01243					GUT_GENOME000565_01587	GUT_GENOME145983_02457		GUT_GENOME000513_00507	GUT_GENOME253287_00035		GUT_GENOME231300_01294		GUT_GENOME209802_01929	GUT_GENOME117619_01197	GUT_GENOME007711_02134		GUT_GENOME010056_00861	GUT_GENOME140272_00364								GUT_GENOME143749_00989						GUT_GENOME260239_00424	GUT_GENOME014238_00787		GUT_GENOME018964_01905
		GUT_GENOME146003_02954		GUT_GENOME175197_00412	GUT_GENOME036651_01484		GUT_GENOME236875_01111	GUT_GENOME232851_00132				GUT_GENOME147612_02939	GUT_GENOME095991_02860	GUT_GENOME095952_01853					GUT_GENOME117619_00302	GUT_GENOME113646_00128		GUT_GENOME044788_00694	GUT_GENOME037804_00631		GUT_GENOME034989_01785		GUT_GENOME001120_04765	GUT_GENOME238305_01789	GUT_GENOME258247_00637		GUT_GENOME220495_01300	GUT_GENOME268596_01283								GUT_GENOME096234_01367						GUT_GENOME261776_00518	GUT_GENOME251709_00707		GUT_GENOME123416_01704
		GUT_GENOME211264_00667		GUT_GENOME078716_00410	GUT_GENOME130417_01943		GUT_GENOME000872_03223	GUT_GENOME237842_00141				GUT_GENOME140076_03173	GUT_GENOME096213_00422	GUT_GENOME000031_01833					GUT_GENOME001853_01517	GUT_GENOME157303_01115		GUT_GENOME275835_02688	GUT_GENOME127797_00024		GUT_GENOME256509_00975		GUT_GENOME209802_00506	GUT_GENOME145698_01735	GUT_GENOME096506_01819		GUT_GENOME000724_02103	GUT_GENOME148443_01962								GUT_GENOME000563_00527						GUT_GENOME200288_04932	GUT_GENOME096290_00086		GUT_GENOME096276_02189
		GUT_GENOME096532_02049		GUT_GENOME096020_02915	GUT_GENOME096435_01457		GUT_GENOME095979_03776	GUT_GENOME095879_00519				GUT_GENOME230476_01069	GUT_GENOME095995_04100	GUT_GENOME148641_01070					GUT_GENOME005886_00802	GUT_GENOME143502_04104		GUT_GENOME259567_00490	GUT_GENOME251867_00045		GUT_GENOME212984_01479		GUT_GENOME096080_03392	GUT_GENOME143156_01352	GUT_GENOME049730_01411		GUT_GENOME096298_04569	GUT_GENOME005404_01320								GUT_GENOME234055_00373						GUT_GENOME116471_00511	GUT_GENOME000534_01904		GUT_GENOME096170_00063
		GUT_GENOME140053_01322		GUT_GENOME230645_01840	GUT_GENOME243880_00249		GUT_GENOME000944_03076	GUT_GENOME258758_01408				GUT_GENOME152519_02708	GUT_GENOME097987_02024	GUT_GENOME096533_01645					GUT_GENOME143726_00832	GUT_GENOME018964_00514		GUT_GENOME140240_00291	GUT_GENOME007936_01658		GUT_GENOME274350_01038		GUT_GENOME140826_02293	GUT_GENOME268665_01665	GUT_GENOME096179_04106		GUT_GENOME147525_04192	GUT_GENOME237449_00672								GUT_GENOME140808_00672						GUT_GENOME038048_00354	GUT_GENOME065370_01012		GUT_GENOME016626_01564
		GUT_GENOME239690_04528		GUT_GENOME192714_00650	GUT_GENOME111334_02145		GUT_GENOME014555_02673	GUT_GENOME208504_00304				GUT_GENOME219438_01952	GUT_GENOME145698_02442	GUT_GENOME097942_01298					GUT_GENOME097987_02127	GUT_GENOME034317_01411		GUT_GENOME205964_00898	GUT_GENOME101248_00724		GUT_GENOME255347_01325		GUT_GENOME253078_00094	GUT_GENOME239280_00375	GUT_GENOME143124_02825		GUT_GENOME000479_01919	GUT_GENOME232852_00333								GUT_GENOME009549_01527						GUT_GENOME106095_01061	GUT_GENOME257612_01088		GUT_GENOME101256_00733
		GUT_GENOME200047_01092		GUT_GENOME263866_00222	GUT_GENOME142576_00144		GUT_GENOME156118_01691	GUT_GENOME171359_01228				GUT_GENOME143505_00002	GUT_GENOME000122_00401	GUT_GENOME157398_00420					GUT_GENOME222694_00743	GUT_GENOME000676_01190		GUT_GENOME163027_02431	GUT_GENOME096454_00416		GUT_GENOME000554_00040		GUT_GENOME251699_01565	GUT_GENOME207399_00537	GUT_GENOME035792_02038		GUT_GENOME065762_00486	GUT_GENOME200288_00802								GUT_GENOME096259_00540						GUT_GENOME278353_01022	GUT_GENOME018655_00511		GUT_GENOME096170_01724
		GUT_GENOME141334_01936		GUT_GENOME048959_00412	GUT_GENOME140320_00101		GUT_GENOME222694_00310	GUT_GENOME095979_03776				GUT_GENOME140299_02817	GUT_GENOME258847_01676	GUT_GENOME097019_00830					GUT_GENOME096063_00038	GUT_GENOME001282_01243		GUT_GENOME118160_02313	GUT_GENOME175656_00527		GUT_GENOME155674_00477		GUT_GENOME126659_01228	GUT_GENOME207259_01056	GUT_GENOME139388_01056		GUT_GENOME001636_00971	GUT_GENOME047195_01161								GUT_GENOME000215_01461						GUT_GENOME147168_01898	GUT_GENOME096509_01635		GUT_GENOME096170_00048
		GUT_GENOME143493_01774		GUT_GENOME008139_01807	GUT_GENOME000768_01529		GUT_GENOME131087_00649	GUT_GENOME014555_02673				GUT_GENOME096201_01817	GUT_GENOME022484_01737	GUT_GENOME103882_02222					GUT_GENOME078449_00183	GUT_GENOME096509_00919		GUT_GENOME000483_05747	GUT_GENOME185774_01824		GUT_GENOME001316_02287		GUT_GENOME097844_01088	GUT_GENOME143498_02132	GUT_GENOME231436_02347		GUT_GENOME066135_00738	GUT_GENOME175656_00334								GUT_GENOME249850_00154						GUT_GENOME170510_00018	GUT_GENOME000509_00181		GUT_GENOME128042_01019
		GUT_GENOME243585_02951		GUT_GENOME024968_01780	GUT_GENOME096049_01278		GUT_GENOME244205_00776	GUT_GENOME156118_01691				GUT_GENOME000035_01875	GUT_GENOME096473_03586	GUT_GENOME141226_02835					GUT_GENOME251721_01674	GUT_GENOME140299_02389		GUT_GENOME113868_00838	GUT_GENOME076000_00675		GUT_GENOME212654_02000		GUT_GENOME096556_02477	GUT_GENOME101260_01838	GUT_GENOME188619_01542		GUT_GENOME101260_02795	GUT_GENOME230915_00207								GUT_GENOME208213_00200						GUT_GENOME110273_01375	GUT_GENOME094063_01255		GUT_GENOME248086_01750
		GUT_GENOME176465_03387		GUT_GENOME257278_01089	GUT_GENOME103727_01425		GUT_GENOME251243_01329	GUT_GENOME222694_00310				GUT_GENOME152519_00362	GUT_GENOME253435_00330	GUT_GENOME247095_01797					GUT_GENOME256155_02944	GUT_GENOME095939_01412		GUT_GENOME146009_01160	GUT_GENOME244286_01622		GUT_GENOME100339_01906		GUT_GENOME102353_03497	GUT_GENOME252836_00399	GUT_GENOME035750_01241		GUT_GENOME247404_01444	GUT_GENOME235154_01183								GUT_GENOME140826_01486						GUT_GENOME000106_02288	GUT_GENOME208102_01706		GUT_GENOME000604_03694
		GUT_GENOME233270_04143		GUT_GENOME143752_00991	GUT_GENOME142588_01838		GUT_GENOME199128_00145	GUT_GENOME244205_00776				GUT_GENOME147854_03787	GUT_GENOME038289_01350	GUT_GENOME242920_00383					GUT_GENOME262105_00469	GUT_GENOME286625_01304		GUT_GENOME217674_01554	GUT_GENOME000862_00021		GUT_GENOME111543_02270		GUT_GENOME227599_00049	GUT_GENOME248004_01138	GUT_GENOME000202_01524		GUT_GENOME172958_02866	GUT_GENOME065321_01690								GUT_GENOME221775_00009						GUT_GENOME227837_01315	GUT_GENOME116624_00002		GUT_GENOME096489_00293
		GUT_GENOME243082_02724		GUT_GENOME047195_00484	GUT_GENOME159348_00545		GUT_GENOME176020_01309	GUT_GENOME170487_00373				GUT_GENOME000655_01730	GUT_GENOME158799_00577	GUT_GENOME096285_00448					GUT_GENOME103893_00769	GUT_GENOME283113_01600		GUT_GENOME146010_00376	GUT_GENOME033839_00266		GUT_GENOME229830_00601		GUT_GENOME182311_00162	GUT_GENOME146008_04099	GUT_GENOME007714_01067		GUT_GENOME110833_00879	GUT_GENOME207512_00415								GUT_GENOME260051_01850						GUT_GENOME017990_01649	GUT_GENOME018858_00189		GUT_GENOME120773_01761
		GUT_GENOME249268_01336		GUT_GENOME143724_00400	GUT_GENOME123860_00638		GUT_GENOME244383_00146	GUT_GENOME011366_02110				GUT_GENOME140240_03502	GUT_GENOME146009_02597	GUT_GENOME000030_01115					GUT_GENOME000595_02871	GUT_GENOME025653_00950		GUT_GENOME260844_00077	GUT_GENOME082534_00018		GUT_GENOME079077_00280		GUT_GENOME095995_03179	GUT_GENOME065576_01364	GUT_GENOME039172_00868		GUT_GENOME138467_00365	GUT_GENOME142576_01710								GUT_GENOME000057_02754						GUT_GENOME098572_01089	GUT_GENOME157273_00969		GUT_GENOME045895_01207
		GUT_GENOME146010_04556		GUT_GENOME143749_02079	GUT_GENOME238208_01380		GUT_GENOME142391_00431	GUT_GENOME262355_00864				GUT_GENOME140078_00088	GUT_GENOME110757_00558	GUT_GENOME096099_02214					GUT_GENOME000682_02677	GUT_GENOME046227_00815		GUT_GENOME001745_03488	GUT_GENOME014039_01447		GUT_GENOME239789_03142		GUT_GENOME000008_01060	GUT_GENOME201215_00813	GUT_GENOME231559_02364		GUT_GENOME143407_02719	GUT_GENOME176717_01404								GUT_GENOME019330_01450						GUT_GENOME000152_00912	GUT_GENOME105882_00887		GUT_GENOME096293_01165
		GUT_GENOME024905_00092		GUT_GENOME147149_01331	GUT_GENOME000057_02398		GUT_GENOME214946_01078	GUT_GENOME251243_01329				GUT_GENOME217674_05812	GUT_GENOME001757_00530	GUT_GENOME034957_00412					GUT_GENOME151520_01955	GUT_GENOME096533_02158		GUT_GENOME022484_03845	GUT_GENOME239268_01624		GUT_GENOME000578_00692		GUT_GENOME231257_03497	GUT_GENOME000753_00510	GUT_GENOME075349_00003		GUT_GENOME000563_04346	GUT_GENOME281441_01220								GUT_GENOME096283_03692						GUT_GENOME176629_02758	GUT_GENOME096544_01794		GUT_GENOME014491_00257
		GUT_GENOME284343_01072		GUT_GENOME095352_00598	GUT_GENOME260369_02002		GUT_GENOME141425_01378	GUT_GENOME103721_00130				GUT_GENOME143484_01828	GUT_GENOME000057_01243	GUT_GENOME096458_02997					GUT_GENOME001105_01722	GUT_GENOME032405_00801		GUT_GENOME192714_02136	GUT_GENOME027390_01432		GUT_GENOME109880_00647		GUT_GENOME095967_02508	GUT_GENOME218730_00028	GUT_GENOME257423_00653		GUT_GENOME143724_00971	GUT_GENOME005466_02403								GUT_GENOME103762_04125						GUT_GENOME143633_03048	GUT_GENOME095357_00505		GUT_GENOME000565_00163
				GUT_GENOME140329_01977	GUT_GENOME142031_02314		GUT_GENOME213063_01443	GUT_GENOME267425_00074					GUT_GENOME001575_00126	GUT_GENOME255109_00902					GUT_GENOME001778_02012	GUT_GENOME096462_00329		GUT_GENOME234139_00850	GUT_GENOME247791_00764		GUT_GENOME096294_00229		GUT_GENOME214946_00025	GUT_GENOME282223_00334	GUT_GENOME000608_01556		GUT_GENOME000166_03367	GUT_GENOME102559_00123								GUT_GENOME143747_03504						GUT_GENOME286887_01464	GUT_GENOME234253_00648		GUT_GENOME210225_01692
				GUT_GENOME284344_00890	GUT_GENOME141425_01273		GUT_GENOME275519_00167	GUT_GENOME200873_00703					GUT_GENOME133541_00422	GUT_GENOME096269_04173					GUT_GENOME000682_01434	GUT_GENOME175345_00486		GUT_GENOME259679_01611	GUT_GENOME236194_02133		GUT_GENOME101940_00574		GUT_GENOME230891_00775	GUT_GENOME000308_01606	GUT_GENOME141287_02851		GUT_GENOME001316_02138	GUT_GENOME139147_01934								GUT_GENOME139627_00076						GUT_GENOME265610_01417	GUT_GENOME170467_00625		GUT_GENOME095941_00011
				GUT_GENOME027533_00973	GUT_GENOME095995_01892		GUT_GENOME137657_01421	GUT_GENOME199128_00145					GUT_GENOME133541_00267	GUT_GENOME096222_00959					GUT_GENOME225259_00608	GUT_GENOME154813_01213		GUT_GENOME153344_02255	GUT_GENOME255273_00875		GUT_GENOME007568_01754		GUT_GENOME096366_04209	GUT_GENOME226303_02031	GUT_GENOME001120_01575		GUT_GENOME264873_01854	GUT_GENOME000250_02112								GUT_GENOME159700_00363						GUT_GENOME091228_01268	GUT_GENOME237335_00240		GUT_GENOME156849_01683
				GUT_GENOME096203_02837	GUT_GENOME279141_01462		GUT_GENOME130046_00118	GUT_GENOME176020_01309					GUT_GENOME096286_00251	GUT_GENOME000558_02065					GUT_GENOME146008_03697	GUT_GENOME239690_04751		GUT_GENOME247095_02128	GUT_GENOME001831_00016		GUT_GENOME096556_02495		GUT_GENOME101636_01094	GUT_GENOME244966_01418	GUT_GENOME191958_01494		GUT_GENOME095021_01602	GUT_GENOME139849_00506								GUT_GENOME158155_01488						GUT_GENOME000024_00665	GUT_GENOME093910_00421		GUT_GENOME246008_00548
				GUT_GENOME262355_01612	GUT_GENOME000047_01702		GUT_GENOME113217_02783	GUT_GENOME259155_00494					GUT_GENOME000004_00696	GUT_GENOME097258_01843					GUT_GENOME143723_00584	GUT_GENOME253217_01383		GUT_GENOME283113_00383	GUT_GENOME157463_01279		GUT_GENOME159262_03161		GUT_GENOME143505_02851	GUT_GENOME095992_00945	GUT_GENOME171682_01947		GUT_GENOME261579_01236	GUT_GENOME081475_00300								GUT_GENOME147525_02337						GUT_GENOME001416_01639	GUT_GENOME208170_00894		GUT_GENOME016626_01558
				GUT_GENOME145984_00056	GUT_GENOME143525_01642		GUT_GENOME147612_02191	GUT_GENOME244383_00146					GUT_GENOME148641_01070	GUT_GENOME143361_01168					GUT_GENOME176758_01440	GUT_GENOME014975_00577		GUT_GENOME244598_00293	GUT_GENOME000221_03175		GUT_GENOME284693_00102		GUT_GENOME000285_02110	GUT_GENOME095978_00168	GUT_GENOME087773_00729		GUT_GENOME134384_01097	GUT_GENOME237835_00324								GUT_GENOME220136_01025						GUT_GENOME003569_00817	GUT_GENOME236877_00417		GUT_GENOME117166_02399
				GUT_GENOME194590_00148	GUT_GENOME000784_02584		GUT_GENOME236866_01244	GUT_GENOME214946_01078					GUT_GENOME157191_00437	GUT_GENOME036853_01297					GUT_GENOME258721_01741	GUT_GENOME145980_03145		GUT_GENOME001255_03466	GUT_GENOME096670_00766		GUT_GENOME096185_01633		GUT_GENOME234088_00707	GUT_GENOME270820_00874	GUT_GENOME122723_00734		GUT_GENOME023635_01028	GUT_GENOME140701_00087								GUT_GENOME231247_03657						GUT_GENOME237439_00847	GUT_GENOME026773_00941		GUT_GENOME230476_00929
				GUT_GENOME140314_00866	GUT_GENOME001261_02642		GUT_GENOME233265_00239	GUT_GENOME137657_01421					GUT_GENOME001341_00807	GUT_GENOME247680_01092					GUT_GENOME140330_02488	GUT_GENOME001364_02558		GUT_GENOME147612_00566	GUT_GENOME007470_01867		GUT_GENOME000944_02931		GUT_GENOME155439_01593	GUT_GENOME032757_00217	GUT_GENOME143633_01406		GUT_GENOME236405_00115	GUT_GENOME261579_01989								GUT_GENOME141118_02968						GUT_GENOME108231_01902	GUT_GENOME213427_00749		GUT_GENOME015816_01764
				GUT_GENOME242264_01686	GUT_GENOME239662_01056		GUT_GENOME121415_00363	GUT_GENOME130046_00118					GUT_GENOME212317_00804	GUT_GENOME025678_00905					GUT_GENOME096562_00731	GUT_GENOME141101_01329		GUT_GENOME105301_00415	GUT_GENOME096270_02140		GUT_GENOME284693_00651		GUT_GENOME115419_01064	GUT_GENOME238979_02749	GUT_GENOME253317_00337		GUT_GENOME234088_00517	GUT_GENOME079379_01507								GUT_GENOME082811_00730						GUT_GENOME145981_00511	GUT_GENOME082983_00057		GUT_GENOME275636_01717
				GUT_GENOME130774_00865	GUT_GENOME123310_00029		GUT_GENOME229830_01170	GUT_GENOME147612_02191					GUT_GENOME103863_00513	GUT_GENOME158799_01220					GUT_GENOME149380_03305	GUT_GENOME142596_01781		GUT_GENOME192714_00230	GUT_GENOME096144_02826		GUT_GENOME143505_02691		GUT_GENOME001418_01715	GUT_GENOME096473_01418	GUT_GENOME256138_01421		GUT_GENOME147149_01456	GUT_GENOME142610_02410								GUT_GENOME034763_00723						GUT_GENOME096300_02612	GUT_GENOME137346_01852		GUT_GENOME019103_01303
				GUT_GENOME283286_00718	GUT_GENOME008627_02034		GUT_GENOME279533_01493	GUT_GENOME236866_01244					GUT_GENOME229830_02863	GUT_GENOME096525_03090					GUT_GENOME096185_00598	GUT_GENOME066135_00661		GUT_GENOME113217_02665	GUT_GENOME277097_00551		GUT_GENOME143232_04064		GUT_GENOME001120_01575	GUT_GENOME266139_00447	GUT_GENOME000200_00373		GUT_GENOME231626_01304	GUT_GENOME000196_01529								GUT_GENOME194902_01941						GUT_GENOME007974_00344	GUT_GENOME111204_00975		GUT_GENOME096170_02019
				GUT_GENOME268527_00678	GUT_GENOME075349_01092		GUT_GENOME026228_00121	GUT_GENOME279533_01493					GUT_GENOME001636_00586	GUT_GENOME096246_02602					GUT_GENOME096473_04718	GUT_GENOME242764_00824		GUT_GENOME105301_01189	GUT_GENOME274372_01942		GUT_GENOME001778_02495		GUT_GENOME102353_02607	GUT_GENOME120773_00806	GUT_GENOME239144_00409		GUT_GENOME284185_01533	GUT_GENOME000260_01245								GUT_GENOME033647_01245						GUT_GENOME142399_00181	GUT_GENOME149497_00163		GUT_GENOME147598_02410
				GUT_GENOME007446_02145	GUT_GENOME243317_00624		GUT_GENOME084477_02467	GUT_GENOME229830_01170					GUT_GENOME038202_01755	GUT_GENOME096332_00615					GUT_GENOME101260_01160	GUT_GENOME251983_01221		GUT_GENOME000192_02083	GUT_GENOME053393_00555		GUT_GENOME000231_01027		GUT_GENOME274919_01397	GUT_GENOME142853_01754	GUT_GENOME171356_01987		GUT_GENOME261291_00420	GUT_GENOME258224_00468								GUT_GENOME256176_01374						GUT_GENOME000248_00643	GUT_GENOME009437_02193		GUT_GENOME001115_02792
				GUT_GENOME000279_00494	GUT_GENOME001419_00097		GUT_GENOME263189_00562	GUT_GENOME271683_00954					GUT_GENOME000572_01073	GUT_GENOME096564_02403					GUT_GENOME229830_00294	GUT_GENOME096276_00151		GUT_GENOME219276_01918	GUT_GENOME002158_03763		GUT_GENOME152999_00255		GUT_GENOME001120_04831	GUT_GENOME005862_00997	GUT_GENOME087542_00565		GUT_GENOME001261_02901	GUT_GENOME258161_00874								GUT_GENOME120773_00849						GUT_GENOME212317_00683	GUT_GENOME251924_00775		GUT_GENOME146009_02221
				GUT_GENOME143727_02828	GUT_GENOME096298_01048		GUT_GENOME037806_01196	GUT_GENOME084477_02467					GUT_GENOME140240_03114	GUT_GENOME096441_01457					GUT_GENOME138841_02277	GUT_GENOME096298_03567		GUT_GENOME147678_01225	GUT_GENOME001255_04282		GUT_GENOME237427_00885		GUT_GENOME096489_00704	GUT_GENOME202428_00030	GUT_GENOME086641_00665		GUT_GENOME001340_00205	GUT_GENOME238291_00018								GUT_GENOME057686_02233						GUT_GENOME000237_00270	GUT_GENOME009661_00277		GUT_GENOME045895_01152
				GUT_GENOME000994_00598	GUT_GENOME096537_00242		GUT_GENOME096568_00451	GUT_GENOME096568_00451					GUT_GENOME095991_03120	GUT_GENOME096506_02876					GUT_GENOME034178_02197	GUT_GENOME118058_02003		GUT_GENOME079230_01489	GUT_GENOME227559_01096		GUT_GENOME133372_02407		GUT_GENOME070341_01817	GUT_GENOME126719_01431	GUT_GENOME238203_00982		GUT_GENOME237633_01883	GUT_GENOME285366_00094								GUT_GENOME031782_01934						GUT_GENOME143411_01406	GUT_GENOME232192_04460		GUT_GENOME230476_00661
				GUT_GENOME096495_01586	GUT_GENOME186073_01065		GUT_GENOME138841_02226	GUT_GENOME037806_01196					GUT_GENOME157398_00420	GUT_GENOME141334_03419					GUT_GENOME095850_01136	GUT_GENOME244383_01534		GUT_GENOME237449_02749	GUT_GENOME207228_00278		GUT_GENOME259849_01562		GUT_GENOME239725_02658	GUT_GENOME033131_01259	GUT_GENOME147522_00632		GUT_GENOME093688_00333	GUT_GENOME096497_02329								GUT_GENOME120773_00122						GUT_GENOME096470_01651	GUT_GENOME256853_00486		GUT_GENOME275636_02106
				GUT_GENOME217842_00077	GUT_GENOME009523_02030		GUT_GENOME010933_00645	GUT_GENOME138841_02226					GUT_GENOME042573_00771	GUT_GENOME001773_02012					GUT_GENOME156895_00607	GUT_GENOME096271_02014		GUT_GENOME140082_02518	GUT_GENOME239789_00691		GUT_GENOME095979_00140		GUT_GENOME096573_01991	GUT_GENOME239280_01977	GUT_GENOME098798_01093		GUT_GENOME150307_01083	GUT_GENOME096175_01432								GUT_GENOME286625_01350						GUT_GENOME098242_00874	GUT_GENOME005886_00535		GUT_GENOME034763_00636
				GUT_GENOME097827_00469	GUT_GENOME192985_00012		GUT_GENOME073885_02083	GUT_GENOME237530_00752					GUT_GENOME225259_00197	GUT_GENOME122723_00060					GUT_GENOME098792_01474	GUT_GENOME000141_00510		GUT_GENOME276949_01677	GUT_GENOME095991_01848		GUT_GENOME143211_02295		GUT_GENOME222694_00753	GUT_GENOME115419_00224	GUT_GENOME266465_00103		GUT_GENOME111778_01048	GUT_GENOME113641_00871								GUT_GENOME096543_03876						GUT_GENOME231670_00520	GUT_GENOME231250_02827		GUT_GENOME156244_01830
				GUT_GENOME060514_01244	GUT_GENOME091228_01676		GUT_GENOME146003_02991	GUT_GENOME000725_01014					GUT_GENOME242920_00383	GUT_GENOME095712_00939					GUT_GENOME258847_02590	GUT_GENOME270087_00829		GUT_GENOME138767_02510	GUT_GENOME237201_01162		GUT_GENOME097987_02072		GUT_GENOME103857_00288	GUT_GENOME123416_01324	GUT_GENOME138463_01163		GUT_GENOME143157_00723	GUT_GENOME125765_01998								GUT_GENOME143380_01049						GUT_GENOME096075_00610	GUT_GENOME110966_01142		GUT_GENOME247421_01325
				GUT_GENOME007882_00332	GUT_GENOME009737_01581		GUT_GENOME115935_01714	GUT_GENOME073885_02083					GUT_GENOME212287_00478	GUT_GENOME233759_01219					GUT_GENOME156224_01777	GUT_GENOME142458_01047		GUT_GENOME018115_01188	GUT_GENOME236879_00802		GUT_GENOME143197_02303		GUT_GENOME024527_00659	GUT_GENOME001417_00110	GUT_GENOME156121_00155		GUT_GENOME080199_02808	GUT_GENOME045178_01690								GUT_GENOME260051_01043						GUT_GENOME095997_02127	GUT_GENOME096383_00870		GUT_GENOME015816_01432
				GUT_GENOME001261_00968	GUT_GENOME131073_01744		GUT_GENOME096203_02595	GUT_GENOME120108_02130					GUT_GENOME000189_02420	GUT_GENOME238401_01979					GUT_GENOME145983_02457	GUT_GENOME096384_02625		GUT_GENOME182311_00774	GUT_GENOME013055_01171		GUT_GENOME018576_01282		GUT_GENOME143202_00731	GUT_GENOME270676_01670	GUT_GENOME004335_00709		GUT_GENOME194547_02854	GUT_GENOME118842_01233								GUT_GENOME110846_00439						GUT_GENOME026754_00764	GUT_GENOME096372_02145		GUT_GENOME036853_01121
				GUT_GENOME146010_02043	GUT_GENOME006298_01088		GUT_GENOME120108_02130	GUT_GENOME235149_01173					GUT_GENOME147612_02939	GUT_GENOME143282_00017					GUT_GENOME254013_00504	GUT_GENOME143746_02539		GUT_GENOME116258_01052	GUT_GENOME133541_00299		GUT_GENOME103234_01397		GUT_GENOME281389_00057	GUT_GENOME149090_01045	GUT_GENOME183774_00604		GUT_GENOME001373_02051	GUT_GENOME172958_02839								GUT_GENOME242337_03076						GUT_GENOME285134_00446	GUT_GENOME114602_00144		GUT_GENOME246789_02225
				GUT_GENOME089884_01388	GUT_GENOME007693_01383		GUT_GENOME140299_01342	GUT_GENOME115935_01714					GUT_GENOME005405_00404	GUT_GENOME000031_03558					GUT_GENOME239728_03247	GUT_GENOME246864_00776		GUT_GENOME237833_01072	GUT_GENOME239728_03029		GUT_GENOME118228_00716		GUT_GENOME083197_00697	GUT_GENOME198844_02056	GUT_GENOME100501_00007		GUT_GENOME140345_02676	GUT_GENOME077606_01132								GUT_GENOME164403_00940						GUT_GENOME147678_02154	GUT_GENOME013138_00682		GUT_GENOME147678_02399
				GUT_GENOME091104_00209	GUT_GENOME000962_02120		GUT_GENOME235149_01173	GUT_GENOME096203_02595					GUT_GENOME143361_01168	GUT_GENOME246915_01104					GUT_GENOME095993_01334	GUT_GENOME096512_00933		GUT_GENOME263189_00828	GUT_GENOME147542_02892		GUT_GENOME284343_00941		GUT_GENOME000295_02793	GUT_GENOME236874_00241	GUT_GENOME244253_01313		GUT_GENOME145582_00224	GUT_GENOME252665_00756								GUT_GENOME017205_01670						GUT_GENOME040022_00829	GUT_GENOME260293_01361		GUT_GENOME125418_01407
				GUT_GENOME118058_00960	GUT_GENOME112399_00088		GUT_GENOME096191_02911	GUT_GENOME140299_01342					GUT_GENOME157191_00572	GUT_GENOME096509_01737					GUT_GENOME009334_00303	GUT_GENOME228008_01351		GUT_GENOME095296_04018	GUT_GENOME000735_02309		GUT_GENOME094321_00873		GUT_GENOME258758_02469	GUT_GENOME149380_00588	GUT_GENOME005080_01042		GUT_GENOME001417_04004	GUT_GENOME285322_00852								GUT_GENOME225259_01757						GUT_GENOME284826_01067	GUT_GENOME113174_01395		GUT_GENOME095941_01662
				GUT_GENOME000035_00226	GUT_GENOME000139_03297		GUT_GENOME166968_01592	GUT_GENOME140364_00281					GUT_GENOME001213_02147	GUT_GENOME261390_00021					GUT_GENOME156969_00276	GUT_GENOME147542_02308		GUT_GENOME134988_00291	GUT_GENOME069124_01838		GUT_GENOME120108_02254		GUT_GENOME149380_02769	GUT_GENOME113868_01983	GUT_GENOME046831_00252		GUT_GENOME140236_02229	GUT_GENOME140074_01906								GUT_GENOME143502_03754						GUT_GENOME058212_01551	GUT_GENOME243569_00861		GUT_GENOME031782_02039
				GUT_GENOME143502_01411	GUT_GENOME096506_02555		GUT_GENOME187777_01028	GUT_GENOME096191_02911					GUT_GENOME227151_01121	GUT_GENOME096512_01526					GUT_GENOME001208_00207	GUT_GENOME142578_01180		GUT_GENOME140074_01745	GUT_GENOME143190_00600		GUT_GENOME143190_03023		GUT_GENOME257278_02252	GUT_GENOME258514_02504	GUT_GENOME272985_00302		GUT_GENOME150819_00988	GUT_GENOME283627_00003								GUT_GENOME001270_01411						GUT_GENOME274363_00012	GUT_GENOME238262_00639		GUT_GENOME015816_01850
				GUT_GENOME208213_00952	GUT_GENOME148915_00013		GUT_GENOME219449_00502	GUT_GENOME155275_00796					GUT_GENOME140078_00088	GUT_GENOME018819_00389					GUT_GENOME034386_00737	GUT_GENOME259567_01226		GUT_GENOME001757_01494	GUT_GENOME007711_00451		GUT_GENOME140076_01905		GUT_GENOME149381_01086	GUT_GENOME140245_02288	GUT_GENOME143747_02541		GUT_GENOME007693_01025	GUT_GENOME034317_00279								GUT_GENOME000563_00257						GUT_GENOME096425_01839	GUT_GENOME098791_02197		GUT_GENOME096259_00496
				GUT_GENOME146003_00463	GUT_GENOME095186_00176		GUT_GENOME096292_01108	GUT_GENOME096723_00116					GUT_GENOME001490_00815	GUT_GENOME239257_00015					GUT_GENOME001341_02418	GUT_GENOME025761_01809		GUT_GENOME095021_00812	GUT_GENOME097684_03529		GUT_GENOME222694_01337		GUT_GENOME195667_01271	GUT_GENOME002382_01454	GUT_GENOME142610_05869		GUT_GENOME145695_04463	GUT_GENOME009209_01483								GUT_GENOME140233_02031						GUT_GENOME000245_02494	GUT_GENOME269084_01795		GUT_GENOME249850_01860
				GUT_GENOME095986_05312	GUT_GENOME000232_02094		GUT_GENOME243241_00704	GUT_GENOME278559_01339					GUT_GENOME111543_02409	GUT_GENOME241809_02165					GUT_GENOME279576_01444	GUT_GENOME143421_02189		GUT_GENOME217674_04453	GUT_GENOME258514_00194		GUT_GENOME096286_01277		GUT_GENOME268227_02057	GUT_GENOME187127_00336	GUT_GENOME000963_01653		GUT_GENOME140320_03566	GUT_GENOME001519_01486								GUT_GENOME019103_01497						GUT_GENOME079230_03237	GUT_GENOME257725_00850		GUT_GENOME194902_01187
				GUT_GENOME143752_01797	GUT_GENOME000568_00295		GUT_GENOME077706_01356	GUT_GENOME166968_01592					GUT_GENOME096246_02602	GUT_GENOME194081_00965					GUT_GENOME205964_02140	GUT_GENOME096213_00561		GUT_GENOME140393_01947	GUT_GENOME057672_01944		GUT_GENOME011144_01404		GUT_GENOME176020_01968	GUT_GENOME109102_00614	GUT_GENOME244005_02006		GUT_GENOME000595_04740	GUT_GENOME154740_01722								GUT_GENOME128042_01719						GUT_GENOME143094_00103	GUT_GENOME227599_01449		GUT_GENOME096170_00230
				GUT_GENOME143379_01454	GUT_GENOME010791_01815		GUT_GENOME044483_03711	GUT_GENOME187777_01028					GUT_GENOME273451_00246	GUT_GENOME176732_00892					GUT_GENOME284447_01857	GUT_GENOME194902_00436		GUT_GENOME100343_01560	GUT_GENOME039172_01121		GUT_GENOME021351_01191		GUT_GENOME126719_00104	GUT_GENOME217674_01884	GUT_GENOME231806_00320		GUT_GENOME018108_00295	GUT_GENOME246455_01642								GUT_GENOME143746_03467						GUT_GENOME000760_02012	GUT_GENOME255855_00167		GUT_GENOME247791_00834
				GUT_GENOME207408_00440	GUT_GENOME247095_02096		GUT_GENOME113868_02070	GUT_GENOME219449_00502					GUT_GENOME096332_00615	GUT_GENOME095989_00453					GUT_GENOME143502_04104	GUT_GENOME143282_02278		GUT_GENOME102353_01589	GUT_GENOME143495_00366		GUT_GENOME284343_01624		GUT_GENOME276542_00319	GUT_GENOME283282_01366	GUT_GENOME255792_01572		GUT_GENOME169952_00881	GUT_GENOME000979_01342								GUT_GENOME255792_02660						GUT_GENOME000727_01056	GUT_GENOME129462_01435		GUT_GENOME033647_01294
				GUT_GENOME246171_01780	GUT_GENOME096274_00348		GUT_GENOME140240_04232	GUT_GENOME096292_01108					GUT_GENOME001659_01438	GUT_GENOME245362_02193					GUT_GENOME229574_00296	GUT_GENOME080199_02261		GUT_GENOME141809_00510	GUT_GENOME253072_02676		GUT_GENOME094995_00944		GUT_GENOME001635_01502	GUT_GENOME038356_00926	GUT_GENOME231806_01601		GUT_GENOME081328_00850	GUT_GENOME284658_00523								GUT_GENOME232032_00459						GUT_GENOME096217_01237	GUT_GENOME143752_02387		GUT_GENOME096170_00555
				GUT_GENOME128124_01112	GUT_GENOME253065_01005		GUT_GENOME140076_03776	GUT_GENOME243241_00704					GUT_GENOME001773_02012	GUT_GENOME141727_04395					GUT_GENOME034317_01411	GUT_GENOME231257_03177		GUT_GENOME096270_03277	GUT_GENOME236194_01630		GUT_GENOME115272_02319		GUT_GENOME145983_00705	GUT_GENOME285195_00761	GUT_GENOME116349_00389		GUT_GENOME062339_00145	GUT_GENOME025678_00148								GUT_GENOME141089_01215						GUT_GENOME191265_01513	GUT_GENOME139096_00220		GUT_GENOME001354_01173
				GUT_GENOME232032_03133	GUT_GENOME244205_00722		GUT_GENOME001635_02544	GUT_GENOME077706_01356					GUT_GENOME108993_04042	GUT_GENOME140329_00920					GUT_GENOME001282_01243	GUT_GENOME133372_00549		GUT_GENOME149380_02323	GUT_GENOME239673_01638		GUT_GENOME096222_02033		GUT_GENOME124777_00435	GUT_GENOME001120_02926	GUT_GENOME140246_02898		GUT_GENOME001757_00769	GUT_GENOME105828_00050								GUT_GENOME025525_00631						GUT_GENOME144544_04112	GUT_GENOME140315_02605		GUT_GENOME086272_00124
				GUT_GENOME143727_02602	GUT_GENOME000094_01060		GUT_GENOME000220_00279	GUT_GENOME044483_03711					GUT_GENOME238401_01979	GUT_GENOME117212_00931					GUT_GENOME001016_00281	GUT_GENOME019095_01189		GUT_GENOME020577_02078	GUT_GENOME145985_02154		GUT_GENOME255109_01318		GUT_GENOME034955_00421	GUT_GENOME096424_00450	GUT_GENOME147630_01973		GUT_GENOME001270_03757	GUT_GENOME244133_00450								GUT_GENOME103766_03198						GUT_GENOME188425_00253	GUT_GENOME284580_01671		GUT_GENOME033647_01702
				GUT_GENOME000852_02495	GUT_GENOME175935_01028		GUT_GENOME098154_02183	GUT_GENOME139713_00683					GUT_GENOME096193_01279	GUT_GENOME096183_01206					GUT_GENOME140299_02389	GUT_GENOME017567_00526		GUT_GENOME017737_00120	GUT_GENOME019095_02074		GUT_GENOME201325_01023		GUT_GENOME257096_00199	GUT_GENOME096099_01512	GUT_GENOME258728_00025		GUT_GENOME086504_00847	GUT_GENOME096567_00175								GUT_GENOME143723_00939						GUT_GENOME096293_03424	GUT_GENOME143400_03089		GUT_GENOME096276_01189
				GUT_GENOME257679_02615	GUT_GENOME243928_00216		GUT_GENOME106027_00721	GUT_GENOME272420_00488					GUT_GENOME095296_00912	GUT_GENOME177471_02910					GUT_GENOME142411_00383	GUT_GENOME231806_01481		GUT_GENOME144544_03749	GUT_GENOME000906_03176		GUT_GENOME140283_00039		GUT_GENOME000595_01732	GUT_GENOME096383_00848	GUT_GENOME096236_00917		GUT_GENOME001471_02607	GUT_GENOME017938_01075								GUT_GENOME018678_01075						GUT_GENOME117761_02860	GUT_GENOME013957_00080		GUT_GENOME246915_01138
				GUT_GENOME253287_03086	GUT_GENOME000057_01384		GUT_GENOME239725_02005	GUT_GENOME044483_02409					GUT_GENOME017938_02086	GUT_GENOME236405_01513					GUT_GENOME250527_00624	GUT_GENOME143752_01941		GUT_GENOME096174_00595	GUT_GENOME094995_01782		GUT_GENOME105347_00183		GUT_GENOME140283_03180	GUT_GENOME039656_01164	GUT_GENOME095986_02255		GUT_GENOME096384_04479	GUT_GENOME259535_01231								GUT_GENOME000595_00234						GUT_GENOME065630_01714	GUT_GENOME146010_04479		GUT_GENOME143751_03255
				GUT_GENOME143496_01084	GUT_GENOME096294_05092		GUT_GENOME264227_00007	GUT_GENOME113868_02070					GUT_GENOME143723_01675	GUT_GENOME141809_01201					GUT_GENOME140245_03119	GUT_GENOME145698_02466		GUT_GENOME141068_00328	GUT_GENOME237866_00821		GUT_GENOME096083_00128		GUT_GENOME239662_01402	GUT_GENOME095967_01852	GUT_GENOME235948_01336		GUT_GENOME232082_03325	GUT_GENOME011366_02110								GUT_GENOME145378_01308						GUT_GENOME274749_00592	GUT_GENOME064659_01005		GUT_GENOME171567_03198
				GUT_GENOME141054_01529	GUT_GENOME236872_01171		GUT_GENOME153870_01055	GUT_GENOME099131_00972					GUT_GENOME113217_01086	GUT_GENOME142591_00133					GUT_GENOME096240_01513	GUT_GENOME000104_02886		GUT_GENOME073885_00517	GUT_GENOME143137_03094		GUT_GENOME034955_01402		GUT_GENOME000221_01778	GUT_GENOME017938_01865	GUT_GENOME141187_01327		GUT_GENOME266139_01217	GUT_GENOME262355_00864								GUT_GENOME249850_00408						GUT_GENOME019200_01687	GUT_GENOME117534_01125		GUT_GENOME248086_01663
				GUT_GENOME000137_01797	GUT_GENOME143497_02959		GUT_GENOME140251_01341	GUT_GENOME158850_01011					GUT_GENOME176732_00892	GUT_GENOME142482_02098					GUT_GENOME029780_01188	GUT_GENOME142031_03414		GUT_GENOME264037_02307	GUT_GENOME096200_00743		GUT_GENOME237424_00337		GUT_GENOME040420_02478	GUT_GENOME175384_01057	GUT_GENOME007443_01163		GUT_GENOME079379_01214	GUT_GENOME001376_01077								GUT_GENOME171567_01711						GUT_GENOME259872_00210	GUT_GENOME092757_01310		GUT_GENOME036853_01449
				GUT_GENOME143740_00560	GUT_GENOME268665_01280		GUT_GENOME028802_00765	GUT_GENOME096548_00057					GUT_GENOME001023_01686	GUT_GENOME211901_01674					GUT_GENOME158600_01132	GUT_GENOME000559_01836		GUT_GENOME159262_00931	GUT_GENOME096879_00977		GUT_GENOME234729_01391		GUT_GENOME157353_01396	GUT_GENOME001223_00693	GUT_GENOME140352_03610		GUT_GENOME000944_00164	GUT_GENOME094594_00512								GUT_GENOME142597_01581						GUT_GENOME257768_00492	GUT_GENOME141397_00435		GUT_GENOME230476_02335
				GUT_GENOME147115_00684	GUT_GENOME231320_01500		GUT_GENOME143497_03312	GUT_GENOME140240_04232					GUT_GENOME118160_00628	GUT_GENOME096373_01894					GUT_GENOME014491_00528	GUT_GENOME282938_00273		GUT_GENOME226303_02034	GUT_GENOME035741_01972		GUT_GENOME239662_00273		GUT_GENOME095971_01643	GUT_GENOME260024_00853	GUT_GENOME237882_00815		GUT_GENOME217236_00211	GUT_GENOME098042_01392								GUT_GENOME232008_04408						GUT_GENOME177322_00410	GUT_GENOME012053_01458		GUT_GENOME115357_01619
				GUT_GENOME140808_02194	GUT_GENOME000963_05082		GUT_GENOME097844_00878	GUT_GENOME140076_03776					GUT_GENOME217674_03692	GUT_GENOME142591_04767					GUT_GENOME257483_01222	GUT_GENOME113868_01447		GUT_GENOME096556_01699	GUT_GENOME236874_02057		GUT_GENOME000682_01856		GUT_GENOME140826_02069	GUT_GENOME001223_00289	GUT_GENOME277093_01165		GUT_GENOME233273_02574	GUT_GENOME111133_01791								GUT_GENOME143727_00872						GUT_GENOME139627_00869	GUT_GENOME008455_01292		GUT_GENOME118188_01269
				GUT_GENOME074354_01075	GUT_GENOME236239_00401		GUT_GENOME140245_03160	GUT_GENOME000220_00279					GUT_GENOME102353_01009	GUT_GENOME096525_03580					GUT_GENOME156969_00439	GUT_GENOME045758_00441		GUT_GENOME246421_00975	GUT_GENOME025653_01523		GUT_GENOME000192_01917		GUT_GENOME163309_01639	GUT_GENOME089515_01101	GUT_GENOME243084_02566		GUT_GENOME001578_00810	GUT_GENOME001309_00561								GUT_GENOME035511_00279						GUT_GENOME171597_04284	GUT_GENOME141809_00114		GUT_GENOME045895_00694
				GUT_GENOME110557_01691	GUT_GENOME103705_00865		GUT_GENOME175554_01469	GUT_GENOME001635_02544					GUT_GENOME177471_02910	GUT_GENOME096246_02315					GUT_GENOME001745_02348	GUT_GENOME284971_01820		GUT_GENOME109620_01691	GUT_GENOME120040_01026		GUT_GENOME256097_00568		GUT_GENOME155674_02010	GUT_GENOME097552_00095	GUT_GENOME198628_02135		GUT_GENOME139732_00792	GUT_GENOME136641_01115								GUT_GENOME125804_01259						GUT_GENOME228036_00658	GUT_GENOME258542_00893		GUT_GENOME249850_01303
				GUT_GENOME144544_04086	GUT_GENOME141675_00895		GUT_GENOME000122_01583	GUT_GENOME008342_00431					GUT_GENOME254213_02273	GUT_GENOME152364_02256					GUT_GENOME262768_01113	GUT_GENOME232032_00884		GUT_GENOME154740_01379	GUT_GENOME000133_02705		GUT_GENOME118058_02041		GUT_GENOME016361_00288	GUT_GENOME177471_04806	GUT_GENOME246096_00206		GUT_GENOME134988_01954	GUT_GENOME096262_00229								GUT_GENOME000706_01890						GUT_GENOME170487_02020	GUT_GENOME013431_01277		GUT_GENOME193239_00519
				GUT_GENOME026064_00073	GUT_GENOME000931_01765		GUT_GENOME096563_00995	GUT_GENOME000582_00988					GUT_GENOME141809_01201	GUT_GENOME231320_00682					GUT_GENOME009103_01195	GUT_GENOME001364_03567		GUT_GENOME136641_00011	GUT_GENOME096294_03621		GUT_GENOME096386_01270		GUT_GENOME000189_01131	GUT_GENOME122014_01121	GUT_GENOME261579_00509		GUT_GENOME025678_01283	GUT_GENOME208016_01760								GUT_GENOME247095_02570						GUT_GENOME079745_01883	GUT_GENOME207475_00885		GUT_GENOME141059_00893
				GUT_GENOME079230_02256	GUT_GENOME140076_05120		GUT_GENOME107760_02152	GUT_GENOME098154_02183					GUT_GENOME001324_01927	GUT_GENOME100343_01711					GUT_GENOME000513_04040	GUT_GENOME071810_01751		GUT_GENOME108993_04746	GUT_GENOME000625_00221		GUT_GENOME108274_00603		GUT_GENOME123926_00533	GUT_GENOME129089_01632	GUT_GENOME096374_01890		GUT_GENOME002158_03153	GUT_GENOME137657_01421								GUT_GENOME144544_01691						GUT_GENOME147525_03596	GUT_GENOME158484_01782		GUT_GENOME141059_01669
				GUT_GENOME134988_01824	GUT_GENOME140361_03256		GUT_GENOME231966_01456	GUT_GENOME106027_00721					GUT_GENOME096096_00209	GUT_GENOME000215_01612					GUT_GENOME262105_00931	GUT_GENOME000563_01108		GUT_GENOME121220_01995	GUT_GENOME000565_04368		GUT_GENOME218891_01795		GUT_GENOME276949_01543	GUT_GENOME143682_01235	GUT_GENOME088178_01173		GUT_GENOME283627_02279	GUT_GENOME177196_00689								GUT_GENOME140808_01906						GUT_GENOME017938_01608	GUT_GENOME128273_00815		GUT_GENOME244035_01498
				GUT_GENOME001689_03023	GUT_GENOME096166_03224		GUT_GENOME068585_00853	GUT_GENOME239725_02005					GUT_GENOME211901_01674	GUT_GENOME103727_03484					GUT_GENOME014039_00033	GUT_GENOME247475_01467		GUT_GENOME000944_03407	GUT_GENOME021955_02339		GUT_GENOME095979_03260		GUT_GENOME000367_00530	GUT_GENOME243826_01165	GUT_GENOME157264_00927		GUT_GENOME145981_03352	GUT_GENOME236866_01244								GUT_GENOME143751_03010						GUT_GENOME123317_00464	GUT_GENOME243177_00457		GUT_GENOME096235_03456
				GUT_GENOME212260_01859	GUT_GENOME285815_01978		GUT_GENOME143484_02930	GUT_GENOME264227_00007					GUT_GENOME102353_00663	GUT_GENOME096436_00491					GUT_GENOME155428_00829	GUT_GENOME143361_01709		GUT_GENOME143505_00740	GUT_GENOME001282_02472		GUT_GENOME219276_01556		GUT_GENOME000518_03350	GUT_GENOME231320_01391	GUT_GENOME096468_03770		GUT_GENOME103893_01167	GUT_GENOME001768_00152								GUT_GENOME145982_00754						GUT_GENOME140337_02182	GUT_GENOME173869_00571		GUT_GENOME034763_01503
				GUT_GENOME000122_03100	GUT_GENOME098572_03420		GUT_GENOME015836_01687	GUT_GENOME100276_00871					GUT_GENOME000872_00801	GUT_GENOME096443_00727					GUT_GENOME129153_01192	GUT_GENOME285301_01792		GUT_GENOME107760_01359	GUT_GENOME258286_00284		GUT_GENOME096083_03321		GUT_GENOME000035_00044	GUT_GENOME104589_00235	GUT_GENOME237633_00105		GUT_GENOME254975_01162	GUT_GENOME091344_00457								GUT_GENOME143407_04226						GUT_GENOME141436_00797	GUT_GENOME104486_01806		GUT_GENOME140074_00550
				GUT_GENOME143747_02396	GUT_GENOME141425_04561		GUT_GENOME046227_00467	GUT_GENOME140251_01341					GUT_GENOME155679_00023	GUT_GENOME096244_03763					GUT_GENOME079379_01492	GUT_GENOME211264_02479		GUT_GENOME000534_01351	GUT_GENOME096217_02103		GUT_GENOME259547_00991		GUT_GENOME171567_02874	GUT_GENOME158781_02524	GUT_GENOME096445_02846		GUT_GENOME095973_02465	GUT_GENOME093693_01717														GUT_GENOME027596_01330	GUT_GENOME242938_00638		GUT_GENOME001046_02616
				GUT_GENOME243824_01760	GUT_GENOME283050_01707		GUT_GENOME283113_00325	GUT_GENOME244035_00411					GUT_GENOME159364_01061	GUT_GENOME034989_00223					GUT_GENOME000906_02748	GUT_GENOME000770_01856		GUT_GENOME096375_01176	GUT_GENOME110959_01656		GUT_GENOME014555_02262		GUT_GENOME149380_00806	GUT_GENOME236239_00473	GUT_GENOME158649_00104		GUT_GENOME018982_01592	GUT_GENOME271683_00954														GUT_GENOME103754_00419	GUT_GENOME157468_00853		GUT_GENOME141809_02622
				GUT_GENOME242840_02557	GUT_GENOME232192_02487		GUT_GENOME104344_00142	GUT_GENOME142591_03978					GUT_GENOME231320_00682	GUT_GENOME096036_01817					GUT_GENOME120108_00004	GUT_GENOME034932_00476		GUT_GENOME143484_01899	GUT_GENOME258557_00940		GUT_GENOME233268_00611		GUT_GENOME022484_03512	GUT_GENOME143211_00576	GUT_GENOME242840_02346		GUT_GENOME247095_00498	GUT_GENOME094660_00512														GUT_GENOME139761_01127	GUT_GENOME001417_01318		GUT_GENOME096276_02024
				GUT_GENOME125826_01413	GUT_GENOME096546_01644		GUT_GENOME237868_00386	GUT_GENOME028802_00765					GUT_GENOME000682_01675	GUT_GENOME103882_01269					GUT_GENOME091736_00715	GUT_GENOME096252_01392		GUT_GENOME172942_01212	GUT_GENOME239674_00033		GUT_GENOME086641_01544		GUT_GENOME109102_00095	GUT_GENOME137346_01804	GUT_GENOME231559_03605		GUT_GENOME164213_00427	GUT_GENOME148095_01492														GUT_GENOME260294_02187	GUT_GENOME231320_03303		GUT_GENOME034763_00899
				GUT_GENOME259135_00387	GUT_GENOME000029_00068		GUT_GENOME199169_00641	GUT_GENOME000133_04035					GUT_GENOME138139_01625	GUT_GENOME231250_03329					GUT_GENOME205174_01741	GUT_GENOME177790_01261		GUT_GENOME284447_02301	GUT_GENOME154740_00740		GUT_GENOME010812_00958		GUT_GENOME001635_02000	GUT_GENOME144544_00402	GUT_GENOME083450_00310		GUT_GENOME140393_00707	GUT_GENOME237530_00752														GUT_GENOME143156_00069	GUT_GENOME000308_01192		GUT_GENOME120773_01590
				GUT_GENOME140337_02063	GUT_GENOME000496_02419		GUT_GENOME000706_02375	GUT_GENOME096574_01442					GUT_GENOME143484_02505	GUT_GENOME097827_01860					GUT_GENOME138139_01261	GUT_GENOME142057_03084		GUT_GENOME200288_00361	GUT_GENOME024836_00244		GUT_GENOME259567_00816		GUT_GENOME140074_00503	GUT_GENOME096380_01019	GUT_GENOME160374_00856		GUT_GENOME022350_01780	GUT_GENOME139732_00420														GUT_GENOME140045_00203	GUT_GENOME259823_01115		GUT_GENOME143760_02533
				GUT_GENOME139132_01477	GUT_GENOME096020_01515		GUT_GENOME226303_00341	GUT_GENOME097844_00878					GUT_GENOME140233_01257	GUT_GENOME143506_00240					GUT_GENOME219438_01952	GUT_GENOME096525_03109		GUT_GENOME096292_02641	GUT_GENOME010023_00812		GUT_GENOME231397_02561		GUT_GENOME258847_01912	GUT_GENOME097394_01651	GUT_GENOME140337_01898		GUT_GENOME005404_01320	GUT_GENOME172932_00745														GUT_GENOME170534_01706	GUT_GENOME237060_00932		GUT_GENOME153344_00701
				GUT_GENOME232032_03887	GUT_GENOME147109_01638		GUT_GENOME126659_01070	GUT_GENOME140245_03160					GUT_GENOME143232_04679	GUT_GENOME125072_01672					GUT_GENOME270087_00829	GUT_GENOME098402_00196		GUT_GENOME140245_01473	GUT_GENOME022180_01671		GUT_GENOME209325_02228		GUT_GENOME217674_03791	GUT_GENOME275465_01011	GUT_GENOME129025_01524		GUT_GENOME265968_00278	GUT_GENOME122014_00353														GUT_GENOME207787_00319	GUT_GENOME282337_00792		GUT_GENOME033647_00726
				GUT_GENOME145983_03779	GUT_GENOME096078_02324		GUT_GENOME269217_00133	GUT_GENOME175554_01469					GUT_GENOME250527_02429	GUT_GENOME096406_04221					GUT_GENOME096096_00623	GUT_GENOME148095_00042		GUT_GENOME115838_01801	GUT_GENOME096292_02151		GUT_GENOME096562_00597		GUT_GENOME096366_01815	GUT_GENOME232472_01055	GUT_GENOME000237_01215		GUT_GENOME123860_00846	GUT_GENOME116219_01706														GUT_GENOME096480_02179	GUT_GENOME237516_02237		GUT_GENOME260051_01305
				GUT_GENOME171643_00235	GUT_GENOME140365_04095		GUT_GENOME251712_01088	GUT_GENOME000122_01583					GUT_GENOME156224_00303	GUT_GENOME000727_01546					GUT_GENOME143746_02539	GUT_GENOME230645_00849		GUT_GENOME170652_00235	GUT_GENOME000192_03610		GUT_GENOME069124_01900		GUT_GENOME143723_01200	GUT_GENOME227824_01500	GUT_GENOME237062_00190		GUT_GENOME232852_00333	GUT_GENOME110833_02522														GUT_GENOME011451_00835	GUT_GENOME262065_00073		GUT_GENOME025525_00700
				GUT_GENOME146010_02045	GUT_GENOME108259_00325		GUT_GENOME261776_01061	GUT_GENOME107760_02152					GUT_GENOME231812_01276	GUT_GENOME145981_01875					GUT_GENOME117619_00097	GUT_GENOME141102_00057		GUT_GENOME106027_00959	GUT_GENOME233283_01470		GUT_GENOME007607_01766		GUT_GENOME096191_02206	GUT_GENOME098912_00587	GUT_GENOME093120_01722		GUT_GENOME096445_03108	GUT_GENOME009549_00615														GUT_GENOME234270_00887	GUT_GENOME000711_01069		GUT_GENOME286625_00941
				GUT_GENOME001681_01128	GUT_GENOME094508_01267		GUT_GENOME236194_02113	GUT_GENOME231966_01456					GUT_GENOME106027_00111	GUT_GENOME010337_00970					GUT_GENOME109512_01346	GUT_GENOME079077_01361		GUT_GENOME096366_02638	GUT_GENOME001877_02831		GUT_GENOME007443_01792		GUT_GENOME280620_01432	GUT_GENOME084946_00219	GUT_GENOME140104_02706		GUT_GENOME096179_03601	GUT_GENOME001401_00237														GUT_GENOME215193_00644	GUT_GENOME243998_00309		GUT_GENOME260051_01688
				GUT_GENOME019335_01814	GUT_GENOME213384_03034		GUT_GENOME085442_01661	GUT_GENOME256383_01068					GUT_GENOME275692_02575	GUT_GENOME140352_00739					GUT_GENOME143157_02321	GUT_GENOME236866_01803		GUT_GENOME000554_03307	GUT_GENOME143724_01704		GUT_GENOME000899_00431		GUT_GENOME157191_00696	GUT_GENOME230902_00162	GUT_GENOME095247_03221		GUT_GENOME140078_02174	GUT_GENOME234508_00019														GUT_GENOME262938_00279	GUT_GENOME025577_01934		GUT_GENOME247791_02104
				GUT_GENOME139849_00833	GUT_GENOME082983_00106		GUT_GENOME000187_00177	GUT_GENOME143484_02930					GUT_GENOME024263_00239	GUT_GENOME001602_01778					GUT_GENOME190811_00405	GUT_GENOME170504_01202		GUT_GENOME263189_00243	GUT_GENOME275835_02688		GUT_GENOME205964_02413		GUT_GENOME022007_00570	GUT_GENOME212287_01450	GUT_GENOME232218_02200		GUT_GENOME059449_01240	GUT_GENOME008042_01142														GUT_GENOME226031_01239	GUT_GENOME258988_00746		GUT_GENOME096170_00146
				GUT_GENOME137438_01475	GUT_GENOME100192_01649		GUT_GENOME009523_01806	GUT_GENOME130358_02705					GUT_GENOME110705_00238	GUT_GENOME096449_03295					GUT_GENOME096213_00561	GUT_GENOME283163_01353		GUT_GENOME227599_00892	GUT_GENOME044788_00694		GUT_GENOME096292_01133		GUT_GENOME140826_02706	GUT_GENOME143527_00087	GUT_GENOME258847_01912		GUT_GENOME001324_00147	GUT_GENOME017973_02347														GUT_GENOME254344_00872	GUT_GENOME233278_00679		GUT_GENOME284185_00140
				GUT_GENOME147598_02017	GUT_GENOME285123_01587		GUT_GENOME237052_00835	GUT_GENOME000423_00345					GUT_GENOME000944_03071	GUT_GENOME100339_00224					GUT_GENOME010933_00683	GUT_GENOME103751_01220		GUT_GENOME140411_02816	GUT_GENOME000513_00507		GUT_GENOME096573_01672		GUT_GENOME001471_02524	GUT_GENOME239268_00149	GUT_GENOME000268_00254		GUT_GENOME171356_04282	GUT_GENOME278559_01339														GUT_GENOME123864_00676	GUT_GENOME030812_00616		GUT_GENOME268227_01664
				GUT_GENOME143189_01226	GUT_GENOME258258_01641		GUT_GENOME000231_02687	GUT_GENOME046227_00467					GUT_GENOME000094_01179	GUT_GENOME027596_01181					GUT_GENOME259841_00955	GUT_GENOME096099_00886		GUT_GENOME101248_00387	GUT_GENOME259567_00490		GUT_GENOME151520_00924		GUT_GENOME001745_01472	GUT_GENOME158484_00803	GUT_GENOME146009_02349		GUT_GENOME155275_00684	GUT_GENOME171682_03897														GUT_GENOME203592_01293	GUT_GENOME090444_00310		GUT_GENOME156849_00548
				GUT_GENOME029599_01557	GUT_GENOME000980_03712		GUT_GENOME231453_04092	GUT_GENOME283113_00325					GUT_GENOME157833_01019	GUT_GENOME233276_00548					GUT_GENOME067057_00007	GUT_GENOME096372_05560		GUT_GENOME001587_02061	GUT_GENOME000963_00217		GUT_GENOME206574_02030		GUT_GENOME140330_00439	GUT_GENOME018425_01803	GUT_GENOME219449_00407		GUT_GENOME103705_03994	GUT_GENOME154595_01310														GUT_GENOME017704_00277	GUT_GENOME278449_00236		GUT_GENOME275636_00878
				GUT_GENOME143727_00477	GUT_GENOME145980_00934		GUT_GENOME142497_02292	GUT_GENOME147138_03264					GUT_GENOME155972_00625	GUT_GENOME034178_03100					GUT_GENOME000231_00697	GUT_GENOME140053_04094		GUT_GENOME270963_01014	GUT_GENOME205964_00898		GUT_GENOME026716_00171		GUT_GENOME171356_00059	GUT_GENOME262257_00502	GUT_GENOME143740_01648		GUT_GENOME142496_02198	GUT_GENOME123625_01333														GUT_GENOME112419_01481	GUT_GENOME027298_00062		GUT_GENOME045895_01206
				GUT_GENOME000187_00016	GUT_GENOME098568_02478		GUT_GENOME003665_00224	GUT_GENOME143497_01123					GUT_GENOME253356_01016	GUT_GENOME113507_00501					GUT_GENOME080199_02261	GUT_GENOME000483_02320		GUT_GENOME139147_02011	GUT_GENOME140240_00291		GUT_GENOME259155_01655		GUT_GENOME263189_02783	GUT_GENOME270284_00102	GUT_GENOME000711_00835		GUT_GENOME207512_00415	GUT_GENOME218245_01124														GUT_GENOME139568_01115	GUT_GENOME142057_02249		GUT_GENOME082811_01311
				GUT_GENOME070341_02172	GUT_GENOME179657_01312		GUT_GENOME096174_03125	GUT_GENOME104344_00142					GUT_GENOME001677_01066	GUT_GENOME068725_01947					GUT_GENOME001471_02930	GUT_GENOME247084_01968		GUT_GENOME229830_00556	GUT_GENOME216302_02091		GUT_GENOME096240_01832		GUT_GENOME229830_03688	GUT_GENOME126659_02463	GUT_GENOME161955_00366		GUT_GENOME065321_01690	GUT_GENOME077706_01356														GUT_GENOME233270_00428	GUT_GENOME262211_00867		GUT_GENOME036853_01227
				GUT_GENOME096563_00764	GUT_GENOME140365_01447		GUT_GENOME000236_01015	GUT_GENOME096537_00927					GUT_GENOME097844_01116	GUT_GENOME149380_02600					GUT_GENOME059449_02213	GUT_GENOME096056_02006		GUT_GENOME140240_03564	GUT_GENOME060514_00978		GUT_GENOME149381_01645		GUT_GENOME231397_01039	GUT_GENOME270284_00704	GUT_GENOME141425_01130		GUT_GENOME237864_01507	GUT_GENOME193239_00668														GUT_GENOME000104_01024	GUT_GENOME170504_01548		GUT_GENOME082811_01508
				GUT_GENOME126012_01157	GUT_GENOME231626_04081		GUT_GENOME156119_00362	GUT_GENOME226303_00341					GUT_GENOME094660_02412	GUT_GENOME111912_00529					GUT_GENOME001488_00729	GUT_GENOME141089_01129		GUT_GENOME116258_01206	GUT_GENOME239673_04676		GUT_GENOME097844_03133		GUT_GENOME000483_03337	GUT_GENOME111543_01073	GUT_GENOME142396_01483		GUT_GENOME000479_02600	GUT_GENOME001016_03001														GUT_GENOME233267_00138	GUT_GENOME000092_00476		GUT_GENOME237516_02304
				GUT_GENOME075582_01425	GUT_GENOME141003_01734		GUT_GENOME020741_01709	GUT_GENOME269217_00133					GUT_GENOME069692_00921	GUT_GENOME260051_01145					GUT_GENOME001636_01332	GUT_GENOME142050_01022		GUT_GENOME229574_01475	GUT_GENOME092528_01252		GUT_GENOME140240_03094		GUT_GENOME258721_00366	GUT_GENOME102353_02665	GUT_GENOME278789_01631		GUT_GENOME001677_00442	GUT_GENOME100276_01388														GUT_GENOME000029_01957	GUT_GENOME257132_00123		GUT_GENOME260051_01882
				GUT_GENOME176629_00331	GUT_GENOME142458_00817		GUT_GENOME157873_01151	GUT_GENOME126659_01070					GUT_GENOME020577_00887	GUT_GENOME016358_00550					GUT_GENOME001208_02532	GUT_GENOME141425_00230		GUT_GENOME143505_01282	GUT_GENOME118160_02313		GUT_GENOME217850_01602		GUT_GENOME001417_01609	GUT_GENOME175234_00363	GUT_GENOME207750_01933		GUT_GENOME176717_01404	GUT_GENOME255824_01045														GUT_GENOME254202_00164	GUT_GENOME257069_00790		GUT_GENOME128042_00875
				GUT_GENOME006298_01183	GUT_GENOME109114_01712		GUT_GENOME000608_01005	GUT_GENOME261776_01061					GUT_GENOME001602_01778	GUT_GENOME237059_01684					GUT_GENOME143752_01941	GUT_GENOME140393_02874		GUT_GENOME007573_02078	GUT_GENOME075528_05674		GUT_GENOME010023_01592		GUT_GENOME140076_02147	GUT_GENOME283626_02084	GUT_GENOME095980_00368		GUT_GENOME281441_01220	GUT_GENOME001355_00431														GUT_GENOME147796_01485	GUT_GENOME235214_01357		GUT_GENOME031782_00220
				GUT_GENOME141727_00351	GUT_GENOME128145_00633		GUT_GENOME230903_00870	GUT_GENOME236194_02113					GUT_GENOME208213_00492	GUT_GENOME145983_00950					GUT_GENOME000944_01854	GUT_GENOME096189_03438		GUT_GENOME152519_02189	GUT_GENOME096301_01472		GUT_GENOME143505_02654		GUT_GENOME000092_00354	GUT_GENOME152999_01490	GUT_GENOME243354_01615		GUT_GENOME125250_00059	GUT_GENOME044483_03711														GUT_GENOME096172_00402	GUT_GENOME252090_01597		GUT_GENOME000271_00140
				GUT_GENOME109620_00887	GUT_GENOME264873_02209		GUT_GENOME176732_01244	GUT_GENOME096300_00170					GUT_GENOME001261_01326	GUT_GENOME001364_03354					GUT_GENOME096191_00842	GUT_GENOME095296_02145		GUT_GENOME147678_02648	GUT_GENOME137474_00843		GUT_GENOME259567_01264		GUT_GENOME247791_01925	GUT_GENOME149712_00601	GUT_GENOME019619_00827		GUT_GENOME000250_02112	GUT_GENOME045758_02906														GUT_GENOME007990_00219	GUT_GENOME253338_01432		GUT_GENOME249850_01428
				GUT_GENOME103557_01371	GUT_GENOME000219_03241		GUT_GENOME237057_00365	GUT_GENOME237052_00835					GUT_GENOME149380_02600	GUT_GENOME142486_01597					GUT_GENOME262768_00179	GUT_GENOME142586_00861		GUT_GENOME000122_00758	GUT_GENOME000483_05747		GUT_GENOME001255_02677		GUT_GENOME096185_00531	GUT_GENOME127803_01105	GUT_GENOME096435_03630		GUT_GENOME139147_01934	GUT_GENOME158850_01011														GUT_GENOME000047_03192	GUT_GENOME142435_01767		GUT_GENOME170498_00038
				GUT_GENOME145698_00950	GUT_GENOME142587_01078		GUT_GENOME230915_01443	GUT_GENOME000187_00177					GUT_GENOME283163_01560	GUT_GENOME225852_00357					GUT_GENOME145698_02466	GUT_GENOME000031_03444		GUT_GENOME095979_01359	GUT_GENOME180992_00576		GUT_GENOME149574_01284		GUT_GENOME013431_00196	GUT_GENOME147525_00594	GUT_GENOME103713_00087		GUT_GENOME000594_04211	GUT_GENOME096548_00057														GUT_GENOME063091_01190	GUT_GENOME000735_00574		GUT_GENOME260051_01717
				GUT_GENOME128621_00835	GUT_GENOME140278_03087		GUT_GENOME024263_02183	GUT_GENOME152603_00158					GUT_GENOME260051_01145	GUT_GENOME133538_01989					GUT_GENOME000196_01078	GUT_GENOME000575_02566		GUT_GENOME000682_02308	GUT_GENOME140043_02922		GUT_GENOME100290_00387		GUT_GENOME229830_05237	GUT_GENOME095995_03160	GUT_GENOME161997_00956		GUT_GENOME096538_01192	GUT_GENOME012681_00064														GUT_GENOME140104_03386	GUT_GENOME143718_00680		GUT_GENOME018964_00518
				GUT_GENOME149574_01971	GUT_GENOME025308_01550		GUT_GENOME273772_01448	GUT_GENOME254659_00744					GUT_GENOME205656_00299	GUT_GENOME096240_00943					GUT_GENOME000187_00838	GUT_GENOME239690_03260		GUT_GENOME131672_00538	GUT_GENOME238522_01407		GUT_GENOME101260_01872		GUT_GENOME149381_00050	GUT_GENOME095978_01044	GUT_GENOME096530_02422		GUT_GENOME216778_01957	GUT_GENOME037425_01855														GUT_GENOME171392_01525	GUT_GENOME244875_01792		GUT_GENOME036853_00716
				GUT_GENOME207955_03220	GUT_GENOME113237_00152		GUT_GENOME145582_00653	GUT_GENOME000231_02687					GUT_GENOME046227_02160	GUT_GENOME098402_01345					GUT_GENOME001709_02012	GUT_GENOME103762_00164		GUT_GENOME140074_01742	GUT_GENOME146009_01160		GUT_GENOME069692_02180		GUT_GENOME011144_01320	GUT_GENOME128042_00130	GUT_GENOME085442_01027		GUT_GENOME171597_03889	GUT_GENOME192985_01478														GUT_GENOME096069_00266	GUT_GENOME001506_00219		GUT_GENOME000483_05178
				GUT_GENOME103863_02380	GUT_GENOME256243_01029		GUT_GENOME229574_01167	GUT_GENOME237875_02409					GUT_GENOME001488_03314	GUT_GENOME231670_03323					GUT_GENOME253287_00056	GUT_GENOME142483_01571		GUT_GENOME231397_02954	GUT_GENOME217674_01554		GUT_GENOME237431_00741		GUT_GENOME140240_03604	GUT_GENOME217915_01202	GUT_GENOME180009_00383		GUT_GENOME096151_01344	GUT_GENOME008342_00431														GUT_GENOME027270_00927	GUT_GENOME096459_01860		GUT_GENOME033647_01527
				GUT_GENOME264873_00274	GUT_GENOME113174_00100		GUT_GENOME209325_00875	GUT_GENOME113023_00820					GUT_GENOME239725_01263	GUT_GENOME141809_00873					GUT_GENOME239789_03237	GUT_GENOME096424_02018		GUT_GENOME239643_01728	GUT_GENOME192714_02136		GUT_GENOME111729_01767		GUT_GENOME001056_00636	GUT_GENOME064269_00459	GUT_GENOME096185_00531		GUT_GENOME261579_01989	GUT_GENOME237051_01270														GUT_GENOME014819_01776	GUT_GENOME208505_00134		GUT_GENOME015816_01280
				GUT_GENOME002382_05192	GUT_GENOME140245_00486		GUT_GENOME283609_00788	GUT_GENOME110728_00124					GUT_GENOME145983_00950	GUT_GENOME236883_02553					GUT_GENOME001401_02107	GUT_GENOME229392_00632		GUT_GENOME056730_01380	GUT_GENOME146010_00376		GUT_GENOME217236_01548		GUT_GENOME096240_00561	GUT_GENOME215855_01472	GUT_GENOME279866_01802		GUT_GENOME096425_00020	GUT_GENOME001315_02729														GUT_GENOME156895_01384	GUT_GENOME096574_00858		GUT_GENOME140074_01731
				GUT_GENOME103766_04251	GUT_GENOME096507_01150		GUT_GENOME112856_01689	GUT_GENOME095597_00797					GUT_GENOME126659_01938	GUT_GENOME231626_00989					GUT_GENOME254013_02304	GUT_GENOME167947_01134		GUT_GENOME143190_00640	GUT_GENOME001745_03488				GUT_GENOME013046_01150	GUT_GENOME049084_00063	GUT_GENOME143498_02714		GUT_GENOME001779_00381	GUT_GENOME001135_00666														GUT_GENOME174135_00010	GUT_GENOME172369_01210		GUT_GENOME095996_03906
				GUT_GENOME100192_00263	GUT_GENOME120636_00656		GUT_GENOME000682_00344	GUT_GENOME142497_02292					GUT_GENOME000677_00505	GUT_GENOME108554_00894					GUT_GENOME142031_03414	GUT_GENOME226919_00542		GUT_GENOME001120_03060	GUT_GENOME022484_03845				GUT_GENOME143190_00621	GUT_GENOME017790_00753	GUT_GENOME277090_00205		GUT_GENOME079379_01507	GUT_GENOME143682_00356														GUT_GENOME009698_01320	GUT_GENOME262768_01693		GUT_GENOME225807_00289
				GUT_GENOME006956_00724	GUT_GENOME233270_04403		GUT_GENOME045693_01477	GUT_GENOME103750_03302					GUT_GENOME176717_00511	GUT_GENOME238994_02385					GUT_GENOME258044_01716	GUT_GENOME253072_01690		GUT_GENOME284580_01066	GUT_GENOME087397_01280				GUT_GENOME000682_02665	GUT_GENOME096563_03755	GUT_GENOME096144_00935		GUT_GENOME141425_04134	GUT_GENOME013499_00166														GUT_GENOME076493_01570	GUT_GENOME188395_00951		GUT_GENOME145587_00444
				GUT_GENOME143361_01850	GUT_GENOME000594_01371		GUT_GENOME152999_00645	GUT_GENOME003665_00224					GUT_GENOME095879_01355	GUT_GENOME238210_00868					GUT_GENOME000559_01836	GUT_GENOME017898_00452		GUT_GENOME065762_00447	GUT_GENOME234139_00850				GUT_GENOME000221_02048	GUT_GENOME001689_00212	GUT_GENOME143760_00919		GUT_GENOME251015_00357	GUT_GENOME018543_01448														GUT_GENOME096373_02214	GUT_GENOME001538_01260
				GUT_GENOME140826_00561	GUT_GENOME246326_02203		GUT_GENOME243928_01058	GUT_GENOME235948_00239					GUT_GENOME264037_00878	GUT_GENOME146009_02236					GUT_GENOME000706_02055	GUT_GENOME279533_02383		GUT_GENOME095967_02946	GUT_GENOME011266_00446				GUT_GENOME000563_01479	GUT_GENOME118228_00407	GUT_GENOME145695_00589		GUT_GENOME098045_00479	GUT_GENOME117154_00344														GUT_GENOME001806_01455	GUT_GENOME000565_03426
				GUT_GENOME155674_01539	GUT_GENOME243949_00534		GUT_GENOME000662_01301	GUT_GENOME096174_03125					GUT_GENOME001261_02338	GUT_GENOME096248_02555					GUT_GENOME000295_00570	GUT_GENOME286625_00528		GUT_GENOME258883_01358	GUT_GENOME247095_02128				GUT_GENOME096203_04222	GUT_GENOME234088_00862	GUT_GENOME045758_01493		GUT_GENOME046057_01619	GUT_GENOME000133_04035														GUT_GENOME095986_03566	GUT_GENOME220495_00402
				GUT_GENOME144544_02657	GUT_GENOME143124_00521		GUT_GENOME237201_00667	GUT_GENOME000236_01015					GUT_GENOME141809_00873	GUT_GENOME017828_01045					GUT_GENOME007573_00605	GUT_GENOME000020_01425		GUT_GENOME096294_04490	GUT_GENOME157873_00538				GUT_GENOME239662_02456	GUT_GENOME096063_00061	GUT_GENOME158553_00020		GUT_GENOME096033_01239	GUT_GENOME096574_01442														GUT_GENOME171326_00785	GUT_GENOME139828_00362
				GUT_GENOME232302_00894	GUT_GENOME000232_02637		GUT_GENOME284971_01265	GUT_GENOME156119_00362					GUT_GENOME103751_01956	GUT_GENOME243826_02074					GUT_GENOME001213_01268	GUT_GENOME171597_03488		GUT_GENOME159262_00187	GUT_GENOME159606_00319				GUT_GENOME098775_02550	GUT_GENOME270891_00545	GUT_GENOME096166_02876		GUT_GENOME117758_01371	GUT_GENOME046050_01491														GUT_GENOME142591_04180	GUT_GENOME007500_00922
				GUT_GENOME000587_00421	GUT_GENOME091116_00641		GUT_GENOME193403_01743	GUT_GENOME020741_01709					GUT_GENOME141436_02347	GUT_GENOME000899_00265					GUT_GENOME243317_01085	GUT_GENOME096542_01519		GUT_GENOME000122_00816	GUT_GENOME244598_00293				GUT_GENOME118228_01160	GUT_GENOME248619_01562	GUT_GENOME153042_01600		GUT_GENOME254213_01852	GUT_GENOME105828_01541														GUT_GENOME270901_00874	GUT_GENOME207226_00999
				GUT_GENOME000149_01271	GUT_GENOME212260_03274		GUT_GENOME138139_01311	GUT_GENOME157873_01151					GUT_GENOME096096_00272	GUT_GENOME096543_02103					GUT_GENOME147678_02621	GUT_GENOME109093_00352		GUT_GENOME137680_00952	GUT_GENOME105301_00415				GUT_GENOME229830_01009	GUT_GENOME232220_03498	GUT_GENOME096572_00712		GUT_GENOME000196_01529	GUT_GENOME001208_01627														GUT_GENOME140270_03828	GUT_GENOME171643_00830
				GUT_GENOME000004_02076	GUT_GENOME177471_04647		GUT_GENOME152519_00364	GUT_GENOME096518_01328					GUT_GENOME001297_01197	GUT_GENOME113915_01926					GUT_GENOME143156_01000	GUT_GENOME096497_01884		GUT_GENOME229830_03122	GUT_GENOME147612_00566				GUT_GENOME080845_01556	GUT_GENOME247084_01653	GUT_GENOME104146_01356		GUT_GENOME155926_00151	GUT_GENOME139699_00963														GUT_GENOME232008_01033	GUT_GENOME072376_00122
				GUT_GENOME000017_02983	GUT_GENOME175986_01393		GUT_GENOME143724_00293	GUT_GENOME000608_01005					GUT_GENOME001023_01032	GUT_GENOME159262_03452					GUT_GENOME232032_00884	GUT_GENOME096300_02673		GUT_GENOME000225_01511	GUT_GENOME256101_00348				GUT_GENOME096166_02256	GUT_GENOME197982_00011	GUT_GENOME000545_01122		GUT_GENOME165741_01380	GUT_GENOME257007_01688														GUT_GENOME243814_01943	GUT_GENOME117621_01170
				GUT_GENOME095186_01164	GUT_GENOME019200_01815		GUT_GENOME270564_00218	GUT_GENOME230903_00870					GUT_GENOME005080_01016	GUT_GENOME140601_02341					GUT_GENOME000563_01108	GUT_GENOME045758_02936		GUT_GENOME218838_00155	GUT_GENOME001255_03466				GUT_GENOME001745_00156	GUT_GENOME076493_00638	GUT_GENOME096406_02499		GUT_GENOME000260_01245	GUT_GENOME096213_00902														GUT_GENOME001422_02847	GUT_GENOME006314_00527
				GUT_GENOME141089_01499	GUT_GENOME000483_01160		GUT_GENOME007598_01737	GUT_GENOME176732_01244					GUT_GENOME001120_01567	GUT_GENOME238208_00881					GUT_GENOME219449_01202	GUT_GENOME046050_02685		GUT_GENOME023591_02091	GUT_GENOME283113_00383				GUT_GENOME143747_03741	GUT_GENOME022392_01059	GUT_GENOME096559_04917		GUT_GENOME163027_01237	GUT_GENOME078054_00710														GUT_GENOME090745_00351	GUT_GENOME096530_01473
				GUT_GENOME270662_00039	GUT_GENOME096428_00014		GUT_GENOME095995_02044	GUT_GENOME237057_00365					GUT_GENOME146009_02236	GUT_GENOME025525_01022					GUT_GENOME027824_01638	GUT_GENOME096541_03002		GUT_GENOME096294_04501	GUT_GENOME113217_02665				GUT_GENOME099050_01878	GUT_GENOME000871_00566	GUT_GENOME095983_00479		GUT_GENOME124777_01615	GUT_GENOME110766_00726														GUT_GENOME044051_00336	GUT_GENOME009565_00482
				GUT_GENOME096495_00171	GUT_GENOME142418_02983		GUT_GENOME143190_02560	GUT_GENOME230915_01443					GUT_GENOME097987_01866	GUT_GENOME147525_03090					GUT_GENOME001274_01538	GUT_GENOME024743_01116		GUT_GENOME037509_01113	GUT_GENOME105301_01189				GUT_GENOME020577_01394	GUT_GENOME095996_03488	GUT_GENOME199922_00724		GUT_GENOME153166_00871	GUT_GENOME129615_00725														GUT_GENOME096284_01546	GUT_GENOME017394_00610
				GUT_GENOME096546_01315	GUT_GENOME001039_02607		GUT_GENOME103557_01290	GUT_GENOME237432_01294					GUT_GENOME010337_02007	GUT_GENOME236889_02216					GUT_GENOME211264_02479	GUT_GENOME000047_02094		GUT_GENOME001255_04463	GUT_GENOME253970_02774				GUT_GENOME124681_00505	GUT_GENOME142031_04103	GUT_GENOME014977_00184		GUT_GENOME236875_00730	GUT_GENOME239257_01510														GUT_GENOME096506_03606	GUT_GENOME022845_00141
				GUT_GENOME172942_02124	GUT_GENOME001870_00377		GUT_GENOME096240_02647	GUT_GENOME024263_02183					GUT_GENOME017828_01045	GUT_GENOME132077_00344					GUT_GENOME027748_00572			GUT_GENOME024263_00977	GUT_GENOME000192_02083				GUT_GENOME094660_00736	GUT_GENOME103765_02652	GUT_GENOME000609_00178		GUT_GENOME263189_02819	GUT_GENOME107760_02152														GUT_GENOME103724_00905	GUT_GENOME117159_00693
				GUT_GENOME096228_01888	GUT_GENOME096506_01372		GUT_GENOME172376_01414	GUT_GENOME096442_02836					GUT_GENOME005404_01307	GUT_GENOME103893_02958					GUT_GENOME095377_00405			GUT_GENOME046227_02023	GUT_GENOME066712_00673				GUT_GENOME046227_00751	GUT_GENOME156118_00181	GUT_GENOME111204_00732		GUT_GENOME045186_01955	GUT_GENOME098798_01446														GUT_GENOME000196_00354	GUT_GENOME000584_00934
				GUT_GENOME237529_02063	GUT_GENOME166968_01656		GUT_GENOME100192_01731	GUT_GENOME229574_01167					GUT_GENOME096294_02177	GUT_GENOME206071_00176					GUT_GENOME001401_00658			GUT_GENOME143131_00344	GUT_GENOME097975_00026				GUT_GENOME218891_00757	GUT_GENOME103741_00863	GUT_GENOME018557_00490		GUT_GENOME001709_02786	GUT_GENOME096172_00898														GUT_GENOME283163_00112	GUT_GENOME000268_02032
				GUT_GENOME138841_01303	GUT_GENOME000595_04498		GUT_GENOME000564_00411	GUT_GENOME276930_02046					GUT_GENOME096543_02103	GUT_GENOME173058_00781					GUT_GENOME094675_02264			GUT_GENOME045630_00456	GUT_GENOME056730_00156				GUT_GENOME095991_01868	GUT_GENOME255379_00019	GUT_GENOME142612_02888		GUT_GENOME250230_01492	GUT_GENOME256383_01068														GUT_GENOME096210_01757	GUT_GENOME207318_00196
				GUT_GENOME258883_02273	GUT_GENOME001805_00426		GUT_GENOME254063_01201	GUT_GENOME233268_00661					GUT_GENOME084378_00360	GUT_GENOME271908_01661					GUT_GENOME001159_00163			GUT_GENOME157213_02083	GUT_GENOME143127_04148				GUT_GENOME017944_01137	GUT_GENOME212972_00695	GUT_GENOME143092_04468		GUT_GENOME142625_01891	GUT_GENOME143137_03316														GUT_GENOME141183_01996	GUT_GENOME118144_00055
				GUT_GENOME243585_03918	GUT_GENOME096244_04305		GUT_GENOME100879_00877	GUT_GENOME183802_00045					GUT_GENOME208951_01113	GUT_GENOME066135_01348					GUT_GENOME001255_02405			GUT_GENOME000004_02556	GUT_GENOME094995_01776				GUT_GENOME258721_02163	GUT_GENOME114974_01467	GUT_GENOME147550_01863		GUT_GENOME039867_00951	GUT_GENOME273305_00916														GUT_GENOME143380_01520	GUT_GENOME046057_01612
				GUT_GENOME023561_01097	GUT_GENOME175197_00412		GUT_GENOME277404_01914	GUT_GENOME209325_00875					GUT_GENOME111543_01559	GUT_GENOME142031_03116					GUT_GENOME001853_01815			GUT_GENOME285832_00363	GUT_GENOME141089_00420				GUT_GENOME157213_02184	GUT_GENOME217674_01319	GUT_GENOME244248_01024		GUT_GENOME155972_01343	GUT_GENOME131908_00894														GUT_GENOME000200_01772	GUT_GENOME103750_02782
				GUT_GENOME016875_01133	GUT_GENOME078716_00839		GUT_GENOME205656_02151	GUT_GENOME017944_00999					GUT_GENOME159262_03452	GUT_GENOME142546_03273					GUT_GENOME150050_01451			GUT_GENOME000225_01839	GUT_GENOME079230_01489				GUT_GENOME280620_00104	GUT_GENOME147854_03951	GUT_GENOME217508_01203		GUT_GENOME103712_02230	GUT_GENOME117166_00836														GUT_GENOME142031_04013	GUT_GENOME057672_01771
				GUT_GENOME143752_00748	GUT_GENOME078716_00410		GUT_GENOME096538_01193	GUT_GENOME283609_00788					GUT_GENOME002158_02594	GUT_GENOME001422_00721					GUT_GENOME000131_01166			GUT_GENOME133372_00999	GUT_GENOME140043_02504				GUT_GENOME000035_01609	GUT_GENOME087542_00926	GUT_GENOME140270_02638		GUT_GENOME141414_01153	GUT_GENOME251015_00715														GUT_GENOME034183_01110	GUT_GENOME068461_01445
				GUT_GENOME191958_00009	GUT_GENOME230645_01840		GUT_GENOME142628_01422	GUT_GENOME112856_01689					GUT_GENOME096332_00169	GUT_GENOME240252_02063					GUT_GENOME239428_01025			GUT_GENOME100290_01002	GUT_GENOME243602_00014				GUT_GENOME096185_03355	GUT_GENOME096128_01438	GUT_GENOME141425_02551		GUT_GENOME143633_02516	GUT_GENOME149116_00129														GUT_GENOME266586_01337	GUT_GENOME256520_00735
				GUT_GENOME000057_01152	GUT_GENOME192714_00650		GUT_GENOME278116_00405	GUT_GENOME135463_01535					GUT_GENOME147525_03090	GUT_GENOME200288_00580					GUT_GENOME129169_01432			GUT_GENOME022484_01693	GUT_GENOME237449_02749				GUT_GENOME231299_00390	GUT_GENOME115419_01952	GUT_GENOME141068_00406		GUT_GENOME000980_00091	GUT_GENOME096158_01484														GUT_GENOME153241_01617	GUT_GENOME018669_00186
				GUT_GENOME140352_00886	GUT_GENOME096469_00363		GUT_GENOME096168_00357	GUT_GENOME140329_00354					GUT_GENOME172443_01035	GUT_GENOME113709_01313					GUT_GENOME029301_00133			GUT_GENOME218838_01828	GUT_GENOME143137_04460				GUT_GENOME147612_02357	GUT_GENOME066135_00385	GUT_GENOME194590_00077		GUT_GENOME246181_00214	GUT_GENOME096377_01381														GUT_GENOME141586_00039	GUT_GENOME143489_01410
				GUT_GENOME000623_00192	GUT_GENOME143127_00281		GUT_GENOME230645_02397	GUT_GENOME152999_00645					GUT_GENOME159262_02069	GUT_GENOME246951_01502					GUT_GENOME002738_00512			GUT_GENOME000122_01914	GUT_GENOME001678_01588				GUT_GENOME096286_01233	GUT_GENOME035196_00224	GUT_GENOME175622_00711		GUT_GENOME259135_01522	GUT_GENOME087442_00568														GUT_GENOME096442_03850	GUT_GENOME121397_00193
				GUT_GENOME147149_01328	GUT_GENOME142610_01418		GUT_GENOME158306_02672	GUT_GENOME247103_00629					GUT_GENOME176717_00306	GUT_GENOME205238_01393					GUT_GENOME143202_00438			GUT_GENOME274911_01570	GUT_GENOME102112_00420				GUT_GENOME222694_00371	GUT_GENOME176629_00278	GUT_GENOME162261_01437		GUT_GENOME141054_01587	GUT_GENOME084337_00316														GUT_GENOME000094_00649	GUT_GENOME139713_01585
				GUT_GENOME231453_04125	GUT_GENOME263866_00222		GUT_GENOME105301_00699	GUT_GENOME235149_00887					GUT_GENOME252977_01443	GUT_GENOME285651_01552					GUT_GENOME097684_03983			GUT_GENOME024263_00634	GUT_GENOME119153_00065				GUT_GENOME001488_01545	GUT_GENOME103712_02766	GUT_GENOME143497_03581		GUT_GENOME001587_00872	GUT_GENOME129224_00849														GUT_GENOME061051_01576	GUT_GENOME143346_00591
				GUT_GENOME047484_00261	GUT_GENOME200288_02911		GUT_GENOME024527_00829	GUT_GENOME018983_00239					GUT_GENOME253356_02220	GUT_GENOME140340_01588					GUT_GENOME258883_02287			GUT_GENOME105321_00968	GUT_GENOME239673_00368				GUT_GENOME096294_02254	GUT_GENOME260957_01636	GUT_GENOME142415_01152		GUT_GENOME236194_00579	GUT_GENOME237529_00859														GUT_GENOME024450_01202	GUT_GENOME092876_00669
				GUT_GENOME185273_01478	GUT_GENOME095973_01098		GUT_GENOME001778_02242	GUT_GENOME251199_00759					GUT_GENOME103893_02958	GUT_GENOME231920_00223					GUT_GENOME148095_00042			GUT_GENOME219438_02340	GUT_GENOME140082_02518				GUT_GENOME143726_03273	GUT_GENOME095650_00374	GUT_GENOME283627_01850		GUT_GENOME143092_00772	GUT_GENOME274363_02524														GUT_GENOME119700_00686	GUT_GENOME218592_00354
				GUT_GENOME254050_00962	GUT_GENOME143282_01920		GUT_GENOME000432_00761	GUT_GENOME000133_01406					GUT_GENOME206071_00176	GUT_GENOME096077_02007					GUT_GENOME096203_01502			GUT_GENOME096294_04471	GUT_GENOME258397_02968				GUT_GENOME001471_00053	GUT_GENOME231320_02962	GUT_GENOME081289_01684		GUT_GENOME140265_01196	GUT_GENOME106095_00411														GUT_GENOME171359_03927	GUT_GENOME065657_00805
				GUT_GENOME121215_01067	GUT_GENOME048959_00412		GUT_GENOME000578_02888	GUT_GENOME110466_01002					GUT_GENOME250527_01170	GUT_GENOME001738_01070					GUT_GENOME001418_03654			GUT_GENOME140808_03688	GUT_GENOME017737_00015				GUT_GENOME076000_02823	GUT_GENOME140074_02011	GUT_GENOME274122_00859		GUT_GENOME018819_01358	GUT_GENOME283113_00325														GUT_GENOME286704_00764	GUT_GENOME024564_00302
				GUT_GENOME097946_02060	GUT_GENOME060514_00790		GUT_GENOME276126_01055	GUT_GENOME193403_01743					GUT_GENOME265746_01160	GUT_GENOME138452_00686					GUT_GENOME260051_01144			GUT_GENOME061534_00463	GUT_GENOME018115_01188				GUT_GENOME237449_01442	GUT_GENOME103766_03028	GUT_GENOME232302_03056		GUT_GENOME094927_00782	GUT_GENOME155913_00575														GUT_GENOME000290_00181	GUT_GENOME009639_00136
				GUT_GENOME107760_00648	GUT_GENOME000266_02749		GUT_GENOME000818_00249	GUT_GENOME243602_01349					GUT_GENOME143190_03876	GUT_GENOME190431_01136					GUT_GENOME209325_01233			GUT_GENOME037775_02068	GUT_GENOME256068_00925				GUT_GENOME186073_02391	GUT_GENOME229012_02422	GUT_GENOME035872_00813		GUT_GENOME194081_00961	GUT_GENOME257096_00165														GUT_GENOME018983_00708	GUT_GENOME000659_02191
				GUT_GENOME231453_04206	GUT_GENOME256086_01559		GUT_GENOME092065_02999	GUT_GENOME138139_01311					GUT_GENOME142031_03116	GUT_GENOME000001_02771					GUT_GENOME151605_00193			GUT_GENOME096573_00414	GUT_GENOME207750_03489				GUT_GENOME108259_01386	GUT_GENOME037977_00302	GUT_GENOME258247_00723		GUT_GENOME192714_02124	GUT_GENOME129025_00607														GUT_GENOME171356_04385	GUT_GENOME094675_00554
				GUT_GENOME096246_03267	GUT_GENOME257278_01089		GUT_GENOME024743_01583	GUT_GENOME260112_00386					GUT_GENOME152519_02512	GUT_GENOME096522_00191					GUT_GENOME212317_00597			GUT_GENOME217674_01375	GUT_GENOME182311_00774				GUT_GENOME013034_02548	GUT_GENOME197156_01161	GUT_GENOME237421_00423		GUT_GENOME156121_01927	GUT_GENOME143497_01123														GUT_GENOME139741_01351	GUT_GENOME146003_02993
				GUT_GENOME000010_01120	GUT_GENOME143749_02079		GUT_GENOME096473_04682	GUT_GENOME014975_01192					GUT_GENOME159485_02045	GUT_GENOME235498_01122					GUT_GENOME096294_04785			GUT_GENOME252977_00125	GUT_GENOME263189_00828				GUT_GENOME157833_00232	GUT_GENOME014491_01696	GUT_GENOME236325_00017		GUT_GENOME141118_00296	GUT_GENOME098775_02778														GUT_GENOME198850_01478	GUT_GENOME138783_00449
				GUT_GENOME140278_00613	GUT_GENOME024968_01780		GUT_GENOME128517_01320	GUT_GENOME270564_00218					GUT_GENOME096301_01286	GUT_GENOME215104_00233					GUT_GENOME155972_00594			GUT_GENOME076000_00674	GUT_GENOME255913_00816				GUT_GENOME256155_02640	GUT_GENOME101940_00383	GUT_GENOME000141_00192		GUT_GENOME267425_01395	GUT_GENOME145981_00750														GUT_GENOME143740_03114	GUT_GENOME231730_02549
				GUT_GENOME157422_00601	GUT_GENOME047195_00484		GUT_GENOME001255_03995	GUT_GENOME176035_00516					GUT_GENOME000735_02829	GUT_GENOME103868_03002					GUT_GENOME133541_01741			GUT_GENOME096905_00452	GUT_GENOME095296_04018				GUT_GENOME140826_01679	GUT_GENOME085442_01233	GUT_GENOME243082_05234		GUT_GENOME140074_01906	GUT_GENOME044331_01224														GUT_GENOME096273_00673	GUT_GENOME009669_01488
				GUT_GENOME000595_01071	GUT_GENOME076000_00092		GUT_GENOME095978_00737	GUT_GENOME103557_01290					GUT_GENOME000285_00419	GUT_GENOME099523_01941					GUT_GENOME103751_01220			GUT_GENOME122359_00739	GUT_GENOME096533_00684				GUT_GENOME123926_01797	GUT_GENOME096213_00335	GUT_GENOME231559_04705		GUT_GENOME283627_00003	GUT_GENOME096550_04364														GUT_GENOME247455_01667	GUT_GENOME261538_00650
				GUT_GENOME154740_00659	GUT_GENOME078306_00553		GUT_GENOME000094_00402	GUT_GENOME133171_00399					GUT_GENOME231920_00223	GUT_GENOME001488_02757					GUT_GENOME096080_00649			GUT_GENOME143346_00450	GUT_GENOME100339_02171				GUT_GENOME131085_01350	GUT_GENOME199255_00635	GUT_GENOME140043_01170		GUT_GENOME232192_03089	GUT_GENOME226303_00341														GUT_GENOME143498_03658	GUT_GENOME177196_01032
				GUT_GENOME144544_01573	GUT_GENOME140329_01977		GUT_GENOME172443_02516	GUT_GENOME156063_00341					GUT_GENOME140340_01588	GUT_GENOME096178_03891					GUT_GENOME000192_01849			GUT_GENOME000245_02777	GUT_GENOME140074_01745				GUT_GENOME231397_01196	GUT_GENOME250527_02697	GUT_GENOME007443_00539		GUT_GENOME147115_02887	GUT_GENOME096075_00225														GUT_GENOME006956_00968	GUT_GENOME096494_02777
				GUT_GENOME000564_01043	GUT_GENOME027533_00973		GUT_GENOME243020_00717	GUT_GENOME000564_00411					GUT_GENOME194547_02697	GUT_GENOME251925_01482					GUT_GENOME000483_02320			GUT_GENOME238266_00366	GUT_GENOME001757_01494				GUT_GENOME113507_00936	GUT_GENOME001401_00642	GUT_GENOME000931_01633		GUT_GENOME097684_02980	GUT_GENOME100879_01376														GUT_GENOME143727_02442	GUT_GENOME207884_01317
				GUT_GENOME186342_01618	GUT_GENOME249369_01354		GUT_GENOME143760_00436	GUT_GENOME249050_01172					GUT_GENOME190431_01136	GUT_GENOME232192_03996					GUT_GENOME247084_01968			GUT_GENOME000725_03799	GUT_GENOME095021_00812				GUT_GENOME275692_00176	GUT_GENOME247623_01124	GUT_GENOME080015_00137		GUT_GENOME000420_00800	GUT_GENOME147629_01552														GUT_GENOME185278_00069	GUT_GENOME095952_01839
				GUT_GENOME231626_02900	GUT_GENOME239690_05543		GUT_GENOME246864_00934	GUT_GENOME254063_01201					GUT_GENOME024743_00942	GUT_GENOME143749_01853					GUT_GENOME001471_01457			GUT_GENOME239725_01232	GUT_GENOME140393_01947				GUT_GENOME122359_01925	GUT_GENOME261541_02173	GUT_GENOME061534_00302		GUT_GENOME141809_04348	GUT_GENOME239280_00694														GUT_GENOME247584_00920	GUT_GENOME234570_01911
				GUT_GENOME231685_01407	GUT_GENOME000623_02245		GUT_GENOME095971_01651	GUT_GENOME272760_00992					GUT_GENOME235498_01122	GUT_GENOME102353_03580					GUT_GENOME096473_02364			GUT_GENOME284447_01604	GUT_GENOME019305_01470				GUT_GENOME268227_01651	GUT_GENOME146010_00872	GUT_GENOME018964_00162		GUT_GENOME239728_01613	GUT_GENOME152603_00158														GUT_GENOME147115_03628	GUT_GENOME013721_00832
				GUT_GENOME000906_03118	GUT_GENOME282114_01929		GUT_GENOME118160_01982	GUT_GENOME277404_01914					GUT_GENOME276949_02572	GUT_GENOME220136_00986					GUT_GENOME129153_01097			GUT_GENOME112856_02237	GUT_GENOME284185_00311				GUT_GENOME269798_00854	GUT_GENOME096256_00884	GUT_GENOME266586_00544		GUT_GENOME141089_03738	GUT_GENOME000586_03099														GUT_GENOME001274_00587	GUT_GENOME254353_01954
				GUT_GENOME143752_00847	GUT_GENOME075349_01081		GUT_GENOME096298_03217	GUT_GENOME175935_00011					GUT_GENOME118228_01293	GUT_GENOME142486_01022					GUT_GENOME266127_01097			GUT_GENOME137438_01632	GUT_GENOME141809_00510				GUT_GENOME140043_03114	GUT_GENOME001223_01522	GUT_GENOME256155_02640		GUT_GENOME109093_00430	GUT_GENOME066545_01875														GUT_GENOME155439_00006	GUT_GENOME244156_00170
				GUT_GENOME103705_00764	GUT_GENOME262355_01612		GUT_GENOME027309_02399	GUT_GENOME237427_01217					GUT_GENOME001488_02757	GUT_GENOME143740_01378					GUT_GENOME096067_03034			GUT_GENOME100339_01770	GUT_GENOME000279_02304				GUT_GENOME001471_01512	GUT_GENOME143495_03396	GUT_GENOME096465_02719		GUT_GENOME154740_01722	GUT_GENOME143156_00646														GUT_GENOME000198_01455	GUT_GENOME047426_00666
				GUT_GENOME115419_01736	GUT_GENOME145984_00056		GUT_GENOME231300_03064	GUT_GENOME205656_02151					GUT_GENOME219276_01862	GUT_GENOME000575_02403					GUT_GENOME217432_01390			GUT_GENOME010945_00538	GUT_GENOME005141_00903				GUT_GENOME113527_02408	GUT_GENOME001416_01466	GUT_GENOME113507_00936		GUT_GENOME096302_00017	GUT_GENOME142415_00763														GUT_GENOME214106_00614	GUT_GENOME000319_01899
				GUT_GENOME017739_03896	GUT_GENOME122482_01513		GUT_GENOME078034_00449	GUT_GENOME142628_01422					GUT_GENOME001105_01720	GUT_GENOME114436_00599					GUT_GENOME140320_00804			GUT_GENOME014039_00736	GUT_GENOME259679_01422				GUT_GENOME101082_02108	GUT_GENOME207056_00554	GUT_GENOME268399_00298		GUT_GENOME276506_00837	GUT_GENOME000767_01394														GUT_GENOME140296_02115	GUT_GENOME207866_01159
				GUT_GENOME231453_04511	GUT_GENOME130774_00865		GUT_GENOME236869_00066	GUT_GENOME147542_03133					GUT_GENOME096178_03891	GUT_GENOME000338_03925					GUT_GENOME217674_02002			GUT_GENOME140330_01054	GUT_GENOME096270_03277				GUT_GENOME154740_02121	GUT_GENOME157191_01843	GUT_GENOME176465_00433		GUT_GENOME155726_00956	GUT_GENOME215875_00940														GUT_GENOME242764_02840	GUT_GENOME282466_00706
				GUT_GENOME188425_00194	GUT_GENOME283286_00718		GUT_GENOME001519_01280	GUT_GENOME278116_00405					GUT_GENOME251925_01482	GUT_GENOME143723_00872					GUT_GENOME004694_00104			GUT_GENOME101636_01116	GUT_GENOME268227_00692				GUT_GENOME157951_00919	GUT_GENOME218039_00804	GUT_GENOME000537_02016		GUT_GENOME194726_00233	GUT_GENOME018146_00666														GUT_GENOME118235_00042	GUT_GENOME024845_00626
				GUT_GENOME000571_01268	GUT_GENOME242264_01686		GUT_GENOME253356_01041	GUT_GENOME096168_00357					GUT_GENOME143749_01853	GUT_GENOME000147_01296					GUT_GENOME231300_02554			GUT_GENOME000202_01973	GUT_GENOME102353_01589				GUT_GENOME113426_00181	GUT_GENOME087397_00096	GUT_GENOME015047_00038		GUT_GENOME000979_01342	GUT_GENOME095983_02093														GUT_GENOME096388_00367	GUT_GENOME009750_00403
				GUT_GENOME000137_02340	GUT_GENOME257704_06284		GUT_GENOME231559_04141	GUT_GENOME230645_02397					GUT_GENOME004333_00130	GUT_GENOME158821_01328					GUT_GENOME096170_02025			GUT_GENOME001120_01557	GUT_GENOME221971_00743				GUT_GENOME000285_02318	GUT_GENOME145695_03749	GUT_GENOME002158_02981		GUT_GENOME284658_00523	GUT_GENOME038356_01215														GUT_GENOME084610_01648	GUT_GENOME242920_00690
				GUT_GENOME231730_01333	GUT_GENOME007446_02145		GUT_GENOME096294_01226	GUT_GENOME105301_00699					GUT_GENOME102353_03580	GUT_GENOME096533_00893					GUT_GENOME078449_01294			GUT_GENOME000192_01298	GUT_GENOME149380_02323				GUT_GENOME158229_01436	GUT_GENOME218153_00057	GUT_GENOME275347_00477		GUT_GENOME025678_00148	GUT_GENOME012905_00555														GUT_GENOME095994_01972	GUT_GENOME141734_04218
				GUT_GENOME000057_03464	GUT_GENOME000279_00494		GUT_GENOME253287_03091	GUT_GENOME238304_00812					GUT_GENOME138841_01748	GUT_GENOME147598_01344					GUT_GENOME258883_00055			GUT_GENOME143505_01865	GUT_GENOME259479_01050				GUT_GENOME096193_01035	GUT_GENOME140340_00422	GUT_GENOME096572_01737		GUT_GENOME131087_00649	GUT_GENOME115127_00434														GUT_GENOME148088_01231	GUT_GENOME103749_01882
				GUT_GENOME220495_01208	GUT_GENOME268527_00678		GUT_GENOME052375_00156	GUT_GENOME117166_01908					GUT_GENOME115935_00533	GUT_GENOME096390_02868					GUT_GENOME096151_00939			GUT_GENOME001297_01640	GUT_GENOME180017_00196				GUT_GENOME036500_01328	GUT_GENOME074418_00055	GUT_GENOME103751_00778		GUT_GENOME000594_04118	GUT_GENOME239799_00977														GUT_GENOME005080_00336	GUT_GENOME276476_00104
				GUT_GENOME140342_01194	GUT_GENOME113468_01611		GUT_GENOME096185_00575	GUT_GENOME284003_01972					GUT_GENOME140245_02759	GUT_GENOME237051_01040					GUT_GENOME229830_04856			GUT_GENOME017944_01139	GUT_GENOME264398_00576				GUT_GENOME246421_00879	GUT_GENOME018576_00758	GUT_GENOME096248_00615		GUT_GENOME272761_01142	GUT_GENOME190811_00473														GUT_GENOME015599_01855	GUT_GENOME245661_00334
				GUT_GENOME103712_00979	GUT_GENOME017394_01865		GUT_GENOME247475_01961	GUT_GENOME024527_00829					GUT_GENOME017704_00060	GUT_GENOME200288_01395					GUT_GENOME082800_00726			GUT_GENOME040420_01301	GUT_GENOME229830_01311				GUT_GENOME258721_03608	GUT_GENOME234747_00940	GUT_GENOME000196_02350		GUT_GENOME017938_01075	GUT_GENOME095981_00298														GUT_GENOME096283_02009	GUT_GENOME215936_00660
				GUT_GENOME075582_01620	GUT_GENOME143727_02828		GUT_GENOME259679_00599	GUT_GENOME010812_01091					GUT_GENOME176732_01274	GUT_GENOME000575_02404					GUT_GENOME000534_02666			GUT_GENOME234141_01682	GUT_GENOME040022_01333				GUT_GENOME139634_00659	GUT_GENOME161955_01218	GUT_GENOME096222_02290		GUT_GENOME259535_01231	GUT_GENOME102738_00961														GUT_GENOME130358_01654	GUT_GENOME231453_04094
				GUT_GENOME258847_00835	GUT_GENOME143383_00904		GUT_GENOME078005_01738	GUT_GENOME001778_02242					GUT_GENOME207341_00982	GUT_GENOME096494_01079					GUT_GENOME000906_02078			GUT_GENOME096203_03684	GUT_GENOME144544_03749				GUT_GENOME212260_04067	GUT_GENOME096083_03041	GUT_GENOME160895_00151		GUT_GENOME001376_01077	GUT_GENOME000236_01015														GUT_GENOME003665_00230	GUT_GENOME258397_00576
				GUT_GENOME239538_01822	GUT_GENOME217842_00077		GUT_GENOME019335_02096	GUT_GENOME000432_00761					GUT_GENOME220495_01068	GUT_GENOME006298_01223					GUT_GENOME096415_00729			GUT_GENOME251243_01195	GUT_GENOME141068_00328				GUT_GENOME095971_00767	GUT_GENOME098792_01414	GUT_GENOME111729_00754		GUT_GENOME155439_00100	GUT_GENOME142496_01377														GUT_GENOME001364_02836	GUT_GENOME103234_00141
				GUT_GENOME096543_02960	GUT_GENOME096495_01586		GUT_GENOME126719_01178	GUT_GENOME000578_02888					GUT_GENOME069692_01509	GUT_GENOME257679_01805					GUT_GENOME140264_00956			GUT_GENOME002158_02437	GUT_GENOME264037_02307				GUT_GENOME218838_01256	GUT_GENOME237530_02373	GUT_GENOME270878_00754		GUT_GENOME012683_00139	GUT_GENOME005141_00924														GUT_GENOME176717_00503	GUT_GENOME014081_01515
				GUT_GENOME198459_00040	GUT_GENOME000279_00816		GUT_GENOME232192_04462	GUT_GENOME276126_01055					GUT_GENOME143740_01378	GUT_GENOME245362_01212					GUT_GENOME000221_04199			GUT_GENOME000963_05045	GUT_GENOME073885_00517				GUT_GENOME225259_01732	GUT_GENOME153042_00448	GUT_GENOME157951_00919		GUT_GENOME096244_00250	GUT_GENOME096518_01328														GUT_GENOME095992_02653	GUT_GENOME000573_00929
				GUT_GENOME102829_01313	GUT_GENOME231806_03006		GUT_GENOME000554_02957	GUT_GENOME283775_02141					GUT_GENOME239789_02973	GUT_GENOME096189_01770					GUT_GENOME096170_02026			GUT_GENOME020577_01449	GUT_GENOME110741_00050				GUT_GENOME096240_00447	GUT_GENOME196669_00452	GUT_GENOME030812_01424		GUT_GENOME231257_01173	GUT_GENOME142396_02063														GUT_GENOME218105_00133	GUT_GENOME117271_01583
				GUT_GENOME057155_01100	GUT_GENOME000337_00589		GUT_GENOME056730_02148	GUT_GENOME284693_02161					GUT_GENOME128042_00200	GUT_GENOME000571_00185					GUT_GENOME259135_01405			GUT_GENOME096240_02182	GUT_GENOME159262_00931				GUT_GENOME010023_00388	GUT_GENOME125875_02207	GUT_GENOME162087_00263		GUT_GENOME158068_02519	GUT_GENOME000767_02286														GUT_GENOME057980_01346	GUT_GENOME097975_01025
				GUT_GENOME213427_01783	GUT_GENOME280504_00711		GUT_GENOME143711_01324	GUT_GENOME000508_01107					GUT_GENOME243200_01081	GUT_GENOME140246_02803					GUT_GENOME214946_00631			GUT_GENOME010023_02054	GUT_GENOME236237_01509				GUT_GENOME276476_01548	GUT_GENOME038356_01559	GUT_GENOME141005_01945		GUT_GENOME001105_02206	GUT_GENOME145587_01382														GUT_GENOME096493_01558	GUT_GENOME095982_03068
				GUT_GENOME009698_01612	GUT_GENOME237505_00324		GUT_GENOME275813_00692	GUT_GENOME096473_04682					GUT_GENOME143723_00872	GUT_GENOME234802_01723					GUT_GENOME113507_00483			GUT_GENOME237864_00512	GUT_GENOME008483_01948				GUT_GENOME149381_03650	GUT_GENOME270963_01630	GUT_GENOME152999_02078		GUT_GENOME188058_00090	GUT_GENOME010079_00925														GUT_GENOME232336_00930	GUT_GENOME258596_01065
				GUT_GENOME110766_01931	GUT_GENOME007882_00332		GUT_GENOME233283_00712	GUT_GENOME024743_01583					GUT_GENOME147598_01344	GUT_GENOME143724_04580					GUT_GENOME001255_03080			GUT_GENOME108993_03963	GUT_GENOME000448_01937				GUT_GENOME253287_00164	GUT_GENOME177471_02079	GUT_GENOME251332_00006		GUT_GENOME207259_00221	GUT_GENOME000109_01253														GUT_GENOME102728_00369	GUT_GENOME270951_01115
				GUT_GENOME222009_00267	GUT_GENOME001261_00968		GUT_GENOME157833_00240	GUT_GENOME128517_01320					GUT_GENOME207399_01988	GUT_GENOME167947_02244					GUT_GENOME258758_00453			GUT_GENOME231257_01439	GUT_GENOME127505_01331				GUT_GENOME253287_00630	GUT_GENOME125009_00009	GUT_GENOME234088_00744		GUT_GENOME232013_00259	GUT_GENOME225807_00427														GUT_GENOME140251_00610	GUT_GENOME066712_01091
				GUT_GENOME108995_01672	GUT_GENOME237487_01512		GUT_GENOME001139_01537	GUT_GENOME256853_01158					GUT_GENOME001255_02054	GUT_GENOME116144_00964					GUT_GENOME000655_03760			GUT_GENOME155674_01592	GUT_GENOME259528_00424				GUT_GENOME095971_01203	GUT_GENOME217842_01179	GUT_GENOME000568_02053		GUT_GENOME143712_00262	GUT_GENOME081475_01429														GUT_GENOME143709_02840	GUT_GENOME260024_00459
				GUT_GENOME146010_04511	GUT_GENOME115359_00058		GUT_GENOME284658_00446	GUT_GENOME001255_03995					GUT_GENOME268227_01883	GUT_GENOME135463_00511					GUT_GENOME111729_00607			GUT_GENOME000008_00442	GUT_GENOME226303_02034				GUT_GENOME192985_03445	GUT_GENOME094099_01547	GUT_GENOME113915_01564		GUT_GENOME283627_00983	GUT_GENOME139744_01012														GUT_GENOME103868_04114	GUT_GENOME258649_00076
				GUT_GENOME166385_00668	GUT_GENOME261579_01448		GUT_GENOME101940_00415	GUT_GENOME079077_01826					GUT_GENOME101636_00256	GUT_GENOME014491_00490					GUT_GENOME004694_00573			GUT_GENOME096286_01279	GUT_GENOME250816_00764				GUT_GENOME229830_02051	GUT_GENOME163017_00808	GUT_GENOME100339_00572		GUT_GENOME023798_01584	GUT_GENOME094927_01943														GUT_GENOME025619_01625	GUT_GENOME219382_00988
				GUT_GENOME158821_01492	GUT_GENOME091104_00209		GUT_GENOME205964_02318	GUT_GENOME096178_03841					GUT_GENOME096415_02942	GUT_GENOME077606_00920					GUT_GENOME096193_00440			GUT_GENOME017938_00806	GUT_GENOME246421_00975				GUT_GENOME143190_02074	GUT_GENOME095021_00801	GUT_GENOME158638_01912		GUT_GENOME145378_03101	GUT_GENOME245287_01368														GUT_GENOME036763_00227	GUT_GENOME280822_00384
				GUT_GENOME145698_03274	GUT_GENOME095250_00085		GUT_GENOME139637_01305	GUT_GENOME238251_01201					GUT_GENOME270284_00975	GUT_GENOME014888_02171					GUT_GENOME171597_03488			GUT_GENOME231299_01727	GUT_GENOME108231_01797				GUT_GENOME102353_03801	GUT_GENOME179927_00027	GUT_GENOME207104_00960		GUT_GENOME142391_00431	GUT_GENOME106239_00282														GUT_GENOME096178_01369	GUT_GENOME253944_00344
				GUT_GENOME113022_00369	GUT_GENOME118058_00960		GUT_GENOME143602_00108	GUT_GENOME000094_00402					GUT_GENOME096098_01951	GUT_GENOME253903_00170					GUT_GENOME186025_02931			GUT_GENOME000133_05986	GUT_GENOME025308_00985				GUT_GENOME150050_00190	GUT_GENOME156895_00986	GUT_GENOME000057_03330		GUT_GENOME141425_01378	GUT_GENOME096442_02836														GUT_GENOME000558_00793	GUT_GENOME254916_00100
				GUT_GENOME001575_02167	GUT_GENOME096406_01916		GUT_GENOME000008_00854	GUT_GENOME172443_02516					GUT_GENOME095967_01118	GUT_GENOME127776_01572					GUT_GENOME118228_02604			GUT_GENOME143127_03462	GUT_GENOME026811_01994				GUT_GENOME000192_03571	GUT_GENOME266139_00796	GUT_GENOME095986_05514		GUT_GENOME208016_01760	GUT_GENOME047484_00014														GUT_GENOME131908_02223	GUT_GENOME096441_02183
				GUT_GENOME096025_00214	GUT_GENOME096469_00514		GUT_GENOME054531_00765	GUT_GENOME133538_01190					GUT_GENOME006298_01223	GUT_GENOME256097_01308					GUT_GENOME007443_00744			GUT_GENOME118160_00164	GUT_GENOME136641_00011				GUT_GENOME254013_02139	GUT_GENOME117625_01743	GUT_GENOME097987_01671		GUT_GENOME275519_00167	GUT_GENOME239538_01360														GUT_GENOME096096_00192	GUT_GENOME000612_01753
				GUT_GENOME095986_01747	GUT_GENOME243082_00440		GUT_GENOME142057_02246	GUT_GENOME243020_00717					GUT_GENOME171392_00212	GUT_GENOME095996_01561					GUT_GENOME096383_00955			GUT_GENOME236869_01252	GUT_GENOME096542_01013				GUT_GENOME231299_03083	GUT_GENOME163441_01080	GUT_GENOME242264_00215		GUT_GENOME137657_01421	GUT_GENOME004992_00960														GUT_GENOME047123_00877	GUT_GENOME023366_00033
				GUT_GENOME103749_03930	GUT_GENOME208213_00952		GUT_GENOME103863_00481	GUT_GENOME192857_00207					GUT_GENOME062339_00133	GUT_GENOME145698_02287					GUT_GENOME005080_00173			GUT_GENOME016875_02573	GUT_GENOME139262_01008				GUT_GENOME237838_00159	GUT_GENOME030016_01305	GUT_GENOME018344_00342		GUT_GENOME103856_02608	GUT_GENOME000662_01040														GUT_GENOME017790_01344	GUT_GENOME237840_00023
				GUT_GENOME000594_02715	GUT_GENOME182432_01954		GUT_GENOME115210_01978	GUT_GENOME246864_00934					GUT_GENOME143724_04580	GUT_GENOME017567_00310					GUT_GENOME143400_02754			GUT_GENOME114602_00794	GUT_GENOME108993_04746				GUT_GENOME213359_01554	GUT_GENOME000420_02919	GUT_GENOME141763_02320		GUT_GENOME044136_00544	GUT_GENOME264398_00340														GUT_GENOME000724_02752	GUT_GENOME003308_01850
				GUT_GENOME109512_00638	GUT_GENOME143092_04198		GUT_GENOME096244_01034	GUT_GENOME095971_01651					GUT_GENOME000139_02005	GUT_GENOME016626_00017					GUT_GENOME228036_01295			GUT_GENOME096386_00223	GUT_GENOME000944_03407				GUT_GENOME001255_04516	GUT_GENOME001105_02447	GUT_GENOME229830_02051		GUT_GENOME000906_02888	GUT_GENOME001312_00253														GUT_GENOME001135_01276	GUT_GENOME237061_00648
				GUT_GENOME143746_04358	GUT_GENOME000139_01610		GUT_GENOME212964_01914	GUT_GENOME118160_01982					GUT_GENOME096151_01162	GUT_GENOME000770_01392					GUT_GENOME096366_03029			GUT_GENOME020577_02222	GUT_GENOME143505_00740				GUT_GENOME102353_02884	GUT_GENOME273451_01661	GUT_GENOME143749_00023		GUT_GENOME001677_00944	GUT_GENOME103694_04524														GUT_GENOME171536_00760	GUT_GENOME270304_00114
				GUT_GENOME258758_02400	GUT_GENOME142592_04106		GUT_GENOME096124_02789	GUT_GENOME103724_01602					GUT_GENOME000608_01045	GUT_GENOME001738_00992					GUT_GENOME078217_00653			GUT_GENOME000137_00844	GUT_GENOME107760_01359				GUT_GENOME146008_01367	GUT_GENOME124650_00694	GUT_GENOME065882_00390		GUT_GENOME236866_01244	GUT_GENOME256503_00470														GUT_GENOME130010_00327	GUT_GENOME145983_04339
				GUT_GENOME000518_02009	GUT_GENOME146003_00463		GUT_GENOME181333_01690	GUT_GENOME027309_02399					GUT_GENOME101636_00389	GUT_GENOME139627_01531					GUT_GENOME140240_03502			GUT_GENOME222694_02639	GUT_GENOME096375_01176				GUT_GENOME115272_01594	GUT_GENOME081368_01202	GUT_GENOME276125_02038		GUT_GENOME155913_01528	GUT_GENOME251083_00740														GUT_GENOME000250_02791	GUT_GENOME000595_02553
				GUT_GENOME210017_00491	GUT_GENOME095986_05312		GUT_GENOME001745_01795	GUT_GENOME231300_03064					GUT_GENOME207512_00433	GUT_GENOME231247_02451					GUT_GENOME143131_01290			GUT_GENOME000231_00370	GUT_GENOME000534_01351				GUT_GENOME096174_00606	GUT_GENOME101636_02493	GUT_GENOME142688_01434		GUT_GENOME237253_01697	GUT_GENOME243237_00971														GUT_GENOME238979_02135	GUT_GENOME096551_03535
				GUT_GENOME174465_00881	GUT_GENOME143502_01411		GUT_GENOME017790_01450	GUT_GENOME078034_00449					GUT_GENOME000196_01075	GUT_GENOME147523_03286					GUT_GENOME024743_01116			GUT_GENOME271917_01657	GUT_GENOME232851_00442				GUT_GENOME251721_03800	GUT_GENOME104589_00059	GUT_GENOME140365_05660		GUT_GENOME242960_00516	GUT_GENOME065504_01333														GUT_GENOME096543_01655	GUT_GENOME000057_03741
				GUT_GENOME258247_00113	GUT_GENOME143379_01454		GUT_GENOME096670_01541	GUT_GENOME001519_01280					GUT_GENOME135463_00511	GUT_GENOME001575_00628					GUT_GENOME000047_02094			GUT_GENOME251566_01804	GUT_GENOME172942_01212				GUT_GENOME218891_01385	GUT_GENOME095503_01790	GUT_GENOME239674_00844		GUT_GENOME262194_01178	GUT_GENOME112667_00882														GUT_GENOME140264_00082	GUT_GENOME252605_00619
				GUT_GENOME115838_01843	GUT_GENOME140320_00390		GUT_GENOME096386_00209	GUT_GENOME253356_01041					GUT_GENOME096380_01283	GUT_GENOME183079_02038								GUT_GENOME000221_02989	GUT_GENOME110741_03170				GUT_GENOME121215_02258	GUT_GENOME019194_00795	GUT_GENOME121215_01368		GUT_GENOME026228_00121	GUT_GENOME000625_04264														GUT_GENOME141698_01736	GUT_GENOME000812_00431
				GUT_GENOME186025_00584	GUT_GENOME140106_03447		GUT_GENOME096256_03013	GUT_GENOME237873_01024					GUT_GENOME000944_00378	GUT_GENOME171567_03860								GUT_GENOME001575_01823	GUT_GENOME232724_01875				GUT_GENOME000725_00285	GUT_GENOME103751_00333	GUT_GENOME020894_00917		GUT_GENOME094660_00512	GUT_GENOME077706_00120														GUT_GENOME221922_00509	GUT_GENOME255826_00299
				GUT_GENOME062469_00652	GUT_GENOME140053_02614		GUT_GENOME143131_02439	GUT_GENOME096294_01226					GUT_GENOME014491_00490	GUT_GENOME095982_01040								GUT_GENOME000659_00966	GUT_GENOME237449_00501				GUT_GENOME263189_02579	GUT_GENOME016556_00696	GUT_GENOME104570_02168		GUT_GENOME148095_01492	GUT_GENOME094063_00264														GUT_GENOME104570_00117	GUT_GENOME147146_01311
				GUT_GENOME144544_00909	GUT_GENOME000711_00846		GUT_GENOME239710_00308	GUT_GENOME253287_03091					GUT_GENOME000706_00651	GUT_GENOME277090_01306								GUT_GENOME001770_00971	GUT_GENOME200288_00361				GUT_GENOME005141_00601	GUT_GENOME110705_00383	GUT_GENOME285123_01106		GUT_GENOME151017_01785	GUT_GENOME283609_00788														GUT_GENOME050070_00940	GUT_GENOME142592_04562
				GUT_GENOME140270_05314	GUT_GENOME000496_01136		GUT_GENOME258721_02972	GUT_GENOME065657_00710					GUT_GENOME207787_00199	GUT_GENOME113961_01682								GUT_GENOME021351_01042	GUT_GENOME096292_02641				GUT_GENOME272660_00516	GUT_GENOME255347_01613	GUT_GENOME147542_00692		GUT_GENOME129046_01593	GUT_GENOME194589_02089														GUT_GENOME193126_01019	GUT_GENOME157195_01602
				GUT_GENOME147612_03125	GUT_GENOME213384_03131		GUT_GENOME024079_02604	GUT_GENOME247475_01961					GUT_GENOME096366_03868	GUT_GENOME234140_00366								GUT_GENOME239662_00972	GUT_GENOME256353_00575				GUT_GENOME000221_00483	GUT_GENOME254063_00739	GUT_GENOME123310_01323		GUT_GENOME007693_02385	GUT_GENOME173058_00445														GUT_GENOME254370_00270	GUT_GENOME143709_03343
				GUT_GENOME020414_01208	GUT_GENOME128124_01112		GUT_GENOME217674_05863	GUT_GENOME096185_00575					GUT_GENOME095996_01561	GUT_GENOME142853_00273								GUT_GENOME127500_00883	GUT_GENOME140245_01473				GUT_GENOME069692_00092	GUT_GENOME085056_00777	GUT_GENOME037519_00333		GUT_GENOME001575_01355	GUT_GENOME167947_01714														GUT_GENOME000614_00122	GUT_GENOME254050_00350
				GUT_GENOME143484_02959	GUT_GENOME104352_00138		GUT_GENOME250527_01565	GUT_GENOME195281_00937					GUT_GENOME176020_01949	GUT_GENOME097942_00142								GUT_GENOME037804_01676	GUT_GENOME115838_01801				GUT_GENOME017394_00613	GUT_GENOME196940_01805	GUT_GENOME156119_00812		GUT_GENOME027824_02401	GUT_GENOME001022_00682														GUT_GENOME143760_00434	GUT_GENOME176732_00119
				GUT_GENOME026754_01647	GUT_GENOME232008_01432		GUT_GENOME143746_02635	GUT_GENOME191958_02526					GUT_GENOME145698_02287	GUT_GENOME006956_00078								GUT_GENOME079077_00117	GUT_GENOME170652_00235				GUT_GENOME096200_01117	GUT_GENOME094063_00569	GUT_GENOME141414_00124		GUT_GENOME017704_00283	GUT_GENOME158606_00123														GUT_GENOME266481_01511	GUT_GENOME199169_00388
				GUT_GENOME095592_02146	GUT_GENOME210004_00528		GUT_GENOME246421_02932	GUT_GENOME096443_03604					GUT_GENOME001636_02574	GUT_GENOME283200_01468								GUT_GENOME237434_00421	GUT_GENOME106027_00959				GUT_GENOME219438_03366	GUT_GENOME241248_02085	GUT_GENOME011213_00432		GUT_GENOME146003_02991	GUT_GENOME096173_00951														GUT_GENOME257298_00736	GUT_GENOME096501_01502
				GUT_GENOME252988_00227	GUT_GENOME000852_02495		GUT_GENOME142031_04011	GUT_GENOME019335_02096					GUT_GENOME001709_02038	GUT_GENOME096462_00783								GUT_GENOME149381_02638	GUT_GENOME282610_02004				GUT_GENOME001135_02057	GUT_GENOME155674_02636	GUT_GENOME275835_02345		GUT_GENOME000559_05078	GUT_GENOME171682_00264														GUT_GENOME259825_00736	GUT_GENOME142415_00653
				GUT_GENOME157990_00145	GUT_GENOME189835_01117		GUT_GENOME095991_02600	GUT_GENOME141183_00076					GUT_GENOME000559_02787	GUT_GENOME147524_01675								GUT_GENOME001745_02346	GUT_GENOME026702_01521				GUT_GENOME199128_01375	GUT_GENOME159033_01118	GUT_GENOME142595_01505		GUT_GENOME103713_00557	GUT_GENOME141003_00867														GUT_GENOME000571_00040	GUT_GENOME095995_02042
				GUT_GENOME141436_02336	GUT_GENOME044204_00687		GUT_GENOME097684_03190	GUT_GENOME236876_00325					GUT_GENOME096375_00338	GUT_GENOME000047_02094								GUT_GENOME097684_01468	GUT_GENOME263475_00927				GUT_GENOME125072_01459	GUT_GENOME110757_02218	GUT_GENOME025525_00879		GUT_GENOME001401_00237	GUT_GENOME001208_00136														GUT_GENOME271683_00095	GUT_GENOME243849_00303
				GUT_GENOME141284_03283	GUT_GENOME257679_02615		GUT_GENOME095490_00164	GUT_GENOME126719_01178					GUT_GENOME214946_02421	GUT_GENOME001417_01841								GUT_GENOME255999_02408	GUT_GENOME263846_01366				GUT_GENOME073885_01458	GUT_GENOME257420_01881	GUT_GENOME003176_00924		GUT_GENOME285322_01664	GUT_GENOME112419_00913														GUT_GENOME096272_00337	GUT_GENOME103007_01074
				GUT_GENOME231453_04208	GUT_GENOME253287_03086		GUT_GENOME253072_01523	GUT_GENOME213434_01704					GUT_GENOME222694_03118	GUT_GENOME141734_00477								GUT_GENOME014555_00237	GUT_GENOME025308_00990				GUT_GENOME147854_04197	GUT_GENOME116258_01834	GUT_GENOME239875_00602		GUT_GENOME146003_03593	GUT_GENOME092842_01594														GUT_GENOME139860_00342	GUT_GENOME096244_01032
				GUT_GENOME231730_03872	GUT_GENOME247218_00877		GUT_GENOME098909_00447	GUT_GENOME056730_02148					GUT_GENOME119949_00124	GUT_GENOME147152_03558								GUT_GENOME163607_00580	GUT_GENOME096366_02638				GUT_GENOME093248_00488	GUT_GENOME001340_01722	GUT_GENOME141754_02169		GUT_GENOME147542_01721	GUT_GENOME030016_01490														GUT_GENOME221057_01829	GUT_GENOME232032_01832
				GUT_GENOME212260_03030	GUT_GENOME143496_01084		GUT_GENOME234144_00083	GUT_GENOME000554_02957					GUT_GENOME140283_01614	GUT_GENOME166968_01479								GUT_GENOME140240_02443	GUT_GENOME263189_00243				GUT_GENOME118228_01018	GUT_GENOME271377_00509	GUT_GENOME096252_00335		GUT_GENOME256624_00744	GUT_GENOME247103_00629														GUT_GENOME096539_01487	GUT_GENOME121425_01173
				GUT_GENOME145378_04035	GUT_GENOME147115_00684		GUT_GENOME115597_02053	GUT_GENOME157195_02061					GUT_GENOME183079_02038	GUT_GENOME018218_00318								GUT_GENOME226303_00486	GUT_GENOME010648_00129				GUT_GENOME123416_00518	GUT_GENOME000603_01547	GUT_GENOME243145_01507		GUT_GENOME142612_00698	GUT_GENOME007188_00210														GUT_GENOME139132_00156	GUT_GENOME105876_00933
				GUT_GENOME000967_02205	GUT_GENOME000137_01797		GUT_GENOME133372_00811	GUT_GENOME119700_01155					GUT_GENOME171567_03860	GUT_GENOME143751_03993								GUT_GENOME110705_00016	GUT_GENOME257394_00148				GUT_GENOME103766_01409	GUT_GENOME208504_01393	GUT_GENOME257704_00462		GUT_GENOME077706_01356	GUT_GENOME140311_01135														GUT_GENOME095296_03541	GUT_GENOME238261_00394
				GUT_GENOME171356_02379	GUT_GENOME140808_02194		GUT_GENOME251543_00401	GUT_GENOME101248_02334					GUT_GENOME140076_04797	GUT_GENOME001806_01210								GUT_GENOME183079_02135	GUT_GENOME227599_00892				GUT_GENOME096217_00680	GUT_GENOME265580_00967	GUT_GENOME253356_01029		GUT_GENOME145698_04817	GUT_GENOME095515_02637														GUT_GENOME103713_02929	GUT_GENOME106274_00425
				GUT_GENOME177790_01457	GUT_GENOME243082_02726		GUT_GENOME022861_00967	GUT_GENOME000996_01341					GUT_GENOME284285_01736	GUT_GENOME096879_00824								GUT_GENOME143483_01677	GUT_GENOME140411_02816				GUT_GENOME264037_01347	GUT_GENOME087598_01617	GUT_GENOME096289_01878		GUT_GENOME212871_00467	GUT_GENOME019241_00818														GUT_GENOME092528_02297	GUT_GENOME232472_00513
				GUT_GENOME239663_00579	GUT_GENOME095230_01431		GUT_GENOME083450_01707	GUT_GENOME001139_01537					GUT_GENOME138139_01599	GUT_GENOME143709_01427								GUT_GENOME152489_00354	GUT_GENOME101248_00387				GUT_GENOME143502_02966	GUT_GENOME141809_00168	GUT_GENOME000221_00483		GUT_GENOME000367_02291	GUT_GENOME018983_00239														GUT_GENOME096239_02708	GUT_GENOME096248_00434
				GUT_GENOME143749_02582	GUT_GENOME074354_01075		GUT_GENOME243939_00379	GUT_GENOME243303_00100					GUT_GENOME261061_00062	GUT_GENOME096189_02542								GUT_GENOME100339_00567	GUT_GENOME001587_02061				GUT_GENOME123416_02018	GUT_GENOME172958_00031	GUT_GENOME232220_00843		GUT_GENOME205174_01880	GUT_GENOME096522_01145														GUT_GENOME095490_01108	GUT_GENOME095977_00607
				GUT_GENOME143505_00249	GUT_GENOME096532_02499		GUT_GENOME000035_00874	GUT_GENOME000024_00664					GUT_GENOME065630_00563	GUT_GENOME000338_01135								GUT_GENOME258514_00067	GUT_GENOME110741_01998				GUT_GENOME000008_00863	GUT_GENOME000396_01651	GUT_GENOME066938_01092		GUT_GENOME120108_01152	GUT_GENOME007005_00548														GUT_GENOME018882_00367	GUT_GENOME251013_01108
				GUT_GENOME147524_05318	GUT_GENOME110557_01691		GUT_GENOME095981_00648	GUT_GENOME212654_01315					GUT_GENOME216940_00065	GUT_GENOME096468_03383								GUT_GENOME096530_01140	GUT_GENOME270963_01014				GUT_GENOME152489_00129	GUT_GENOME095490_00896	GUT_GENOME096200_01117		GUT_GENOME113156_00658	GUT_GENOME251199_00759														GUT_GENOME143751_03760	GUT_GENOME190474_01131
				GUT_GENOME143192_01393	GUT_GENOME262835_01442		GUT_GENOME000706_00525	GUT_GENOME128581_01673					GUT_GENOME195281_00371	GUT_GENOME254740_00577								GUT_GENOME244445_00796	GUT_GENOME139147_02011				GUT_GENOME155267_00087	GUT_GENOME002738_01757	GUT_GENOME108684_00080		GUT_GENOME140074_01536	GUT_GENOME096401_00793														GUT_GENOME172926_00281	GUT_GENOME000017_00579
				GUT_GENOME000962_00911	GUT_GENOME000575_02549		GUT_GENOME226406_01868	GUT_GENOME284658_00446					GUT_GENOME105301_00702	GUT_GENOME276506_00319								GUT_GENOME234729_00460	GUT_GENOME237445_01254				GUT_GENOME027824_00082	GUT_GENOME265265_01531	GUT_GENOME096541_00250		GUT_GENOME044483_03711	GUT_GENOME253901_00459														GUT_GENOME065762_00175	GUT_GENOME097942_00696
				GUT_GENOME269664_00435	GUT_GENOME144544_04086		GUT_GENOME219276_00927	GUT_GENOME147776_01957					GUT_GENOME246455_00108	GUT_GENOME140364_01580								GUT_GENOME254659_01291	GUT_GENOME235878_01699				GUT_GENOME222694_00612	GUT_GENOME205824_00438	GUT_GENOME131689_01967		GUT_GENOME001355_00431	GUT_GENOME015136_00385														GUT_GENOME027317_00088	GUT_GENOME009178_00918
				GUT_GENOME095230_02300	GUT_GENOME193238_00410		GUT_GENOME096556_02469	GUT_GENOME101940_00415					GUT_GENOME002158_00993	GUT_GENOME207475_00978								GUT_GENOME092292_00784	GUT_GENOME018882_00912				GUT_GENOME251721_03512	GUT_GENOME278952_00136	GUT_GENOME234840_00650		GUT_GENOME000004_01920	GUT_GENOME180129_00091														GUT_GENOME140074_01530	GUT_GENOME096378_00244
				GUT_GENOME000483_05220	GUT_GENOME026064_00073		GUT_GENOME266481_01667	GUT_GENOME205964_02318					GUT_GENOME032966_01315	GUT_GENOME096269_04195								GUT_GENOME217674_00574	GUT_GENOME142610_03078				GUT_GENOME156244_02128	GUT_GENOME155972_01140	GUT_GENOME021289_02623		GUT_GENOME001115_00339	GUT_GENOME023976_01169														GUT_GENOME142492_02102	GUT_GENOME286769_00690
				GUT_GENOME096670_02519	GUT_GENOME212260_01859		GUT_GENOME234656_01206	GUT_GENOME000338_02908					GUT_GENOME001506_03525	GUT_GENOME207955_01046								GUT_GENOME001488_00043	GUT_GENOME116258_01206				GUT_GENOME095991_00382	GUT_GENOME096063_00722	GUT_GENOME096268_01625		GUT_GENOME025308_00812	GUT_GENOME096494_03025														GUT_GENOME193535_00008	GUT_GENOME111944_00619
				GUT_GENOME095952_01224	GUT_GENOME142578_01608		GUT_GENOME235150_00564	GUT_GENOME000008_00854					GUT_GENOME096203_03643	GUT_GENOME095996_02636								GUT_GENOME096366_01625	GUT_GENOME258198_00336				GUT_GENOME096203_04718	GUT_GENOME112443_00629	GUT_GENOME036899_01302		GUT_GENOME165490_01969	GUT_GENOME234088_01446														GUT_GENOME000559_03771	GUT_GENOME247084_00494
				GUT_GENOME000327_02470	GUT_GENOME134988_01824		GUT_GENOME142596_02149	GUT_GENOME059449_00377					GUT_GENOME126719_01326	GUT_GENOME096532_02080								GUT_GENOME095991_01729	GUT_GENOME131085_02515				GUT_GENOME143484_00157	GUT_GENOME284344_01646	GUT_GENOME092757_00904		GUT_GENOME000658_01243	GUT_GENOME048143_00042														GUT_GENOME282790_00996	GUT_GENOME075582_01468
				GUT_GENOME270687_00943	GUT_GENOME096290_02535		GUT_GENOME069692_01755	GUT_GENOME054531_00765					GUT_GENOME144544_00325	GUT_GENOME205964_01443								GUT_GENOME152519_02706	GUT_GENOME007573_02078				GUT_GENOME019335_02352	GUT_GENOME254518_00508	GUT_GENOME273451_00382		GUT_GENOME001135_00666	GUT_GENOME002382_04561														GUT_GENOME270878_00164	GUT_GENOME147598_00695
				GUT_GENOME245362_00901	GUT_GENOME176629_02160		GUT_GENOME000572_01043	GUT_GENOME243411_00477					GUT_GENOME147524_01675	GUT_GENOME098156_00016								GUT_GENOME148641_00451	GUT_GENOME015047_00173				GUT_GENOME245287_01968	GUT_GENOME273906_01445	GUT_GENOME065434_02498		GUT_GENOME142628_02706	GUT_GENOME260112_00386														GUT_GENOME000563_03243	GUT_GENOME111745_00474
				GUT_GENOME103751_02673	GUT_GENOME225144_01093		GUT_GENOME000623_02960	GUT_GENOME118058_00699					GUT_GENOME207866_00692	GUT_GENOME095592_03431								GUT_GENOME091092_02469	GUT_GENOME152519_02189				GUT_GENOME250527_00091	GUT_GENOME239725_03008	GUT_GENOME270687_00324		GUT_GENOME143682_00356	GUT_GENOME226303_00498														GUT_GENOME141675_01020	GUT_GENOME096431_00256
				GUT_GENOME270878_01341	GUT_GENOME142490_01413		GUT_GENOME260703_00579	GUT_GENOME237422_01283					GUT_GENOME199128_01155	GUT_GENOME000784_01974								GUT_GENOME159064_00263	GUT_GENOME001488_00774				GUT_GENOME001488_00151	GUT_GENOME158484_00556	GUT_GENOME213359_00298		GUT_GENOME153870_01055	GUT_GENOME000459_01170														GUT_GENOME171683_00470	GUT_GENOME096472_00793
				GUT_GENOME146008_02028	GUT_GENOME096295_00311		GUT_GENOME034955_00415	GUT_GENOME143497_00469					GUT_GENOME096256_00697	GUT_GENOME039867_01140								GUT_GENOME095983_02135	GUT_GENOME147678_02648				GUT_GENOME001120_04945	GUT_GENOME001800_00745	GUT_GENOME244165_00680		GUT_GENOME257278_00400	GUT_GENOME182432_02240														GUT_GENOME000967_01922	GUT_GENOME207305_00758
				GUT_GENOME141315_00586	GUT_GENOME001689_03023		GUT_GENOME134977_00181	GUT_GENOME097668_00554					GUT_GENOME222694_00074	GUT_GENOME000944_03105								GUT_GENOME157398_01774	GUT_GENOME094063_01019				GUT_GENOME123416_00010	GUT_GENOME246864_00778	GUT_GENOME093609_00193		GUT_GENOME231920_03120	GUT_GENOME256714_01964														GUT_GENOME000496_03689	GUT_GENOME018108_00525
				GUT_GENOME067546_00484	GUT_GENOME143747_02396		GUT_GENOME276949_01336	GUT_GENOME115210_01978					GUT_GENOME001417_01841	GUT_GENOME036651_00577								GUT_GENOME143484_01088	GUT_GENOME000122_00758				GUT_GENOME000994_00969	GUT_GENOME121405_01331	GUT_GENOME001341_02116		GUT_GENOME231730_00302	GUT_GENOME098961_01451														GUT_GENOME259703_00011	GUT_GENOME069104_00306
				GUT_GENOME143380_01704	GUT_GENOME183802_01592		GUT_GENOME242920_01072	GUT_GENOME253078_00100					GUT_GENOME166968_01479	GUT_GENOME015763_00562								GUT_GENOME096200_00094	GUT_GENOME000682_02308				GUT_GENOME251721_03393	GUT_GENOME000215_03097	GUT_GENOME114863_00824		GUT_GENOME143752_04308	GUT_GENOME103557_01290														GUT_GENOME041878_00232	GUT_GENOME243419_00899
				GUT_GENOME145582_01336	GUT_GENOME000250_01738		GUT_GENOME069755_00975	GUT_GENOME181333_01690					GUT_GENOME153042_01737	GUT_GENOME142434_00954								GUT_GENOME013049_00804	GUT_GENOME131672_00538				GUT_GENOME022845_00450	GUT_GENOME100879_01197	GUT_GENOME218106_00663		GUT_GENOME010630_01360	GUT_GENOME098042_01816														GUT_GENOME155726_00345	GUT_GENOME127139_01776
				GUT_GENOME008152_00296	GUT_GENOME095707_00115		GUT_GENOME016361_01855	GUT_GENOME001745_01795					GUT_GENOME107512_00633	GUT_GENOME014720_00605								GUT_GENOME001159_00108	GUT_GENOME140074_01742				GUT_GENOME095991_03220	GUT_GENOME000245_00714	GUT_GENOME002382_03240		GUT_GENOME186025_00493	GUT_GENOME133171_00399														GUT_GENOME141425_01380	GUT_GENOME175326_00621
				GUT_GENOME139200_00161	GUT_GENOME125826_01413		GUT_GENOME140314_00249	GUT_GENOME212961_01921					GUT_GENOME097946_02379	GUT_GENOME095941_01002								GUT_GENOME071857_02683	GUT_GENOME096414_00488				GUT_GENOME017342_00684	GUT_GENOME217842_00826	GUT_GENOME280428_01377		GUT_GENOME232032_00965	GUT_GENOME231391_01585														GUT_GENOME244286_01195	GUT_GENOME134271_00674
				GUT_GENOME201215_01060	GUT_GENOME242840_02557		GUT_GENOME056716_00132	GUT_GENOME022392_01188					GUT_GENOME143751_03993	GUT_GENOME117534_00423								GUT_GENOME245362_02692	GUT_GENOME140701_01988				GUT_GENOME098909_01133	GUT_GENOME259797_00141	GUT_GENOME179941_00494		GUT_GENOME196908_01344	GUT_GENOME268399_01251														GUT_GENOME111133_00355	GUT_GENOME096542_02778
				GUT_GENOME244286_00908	GUT_GENOME259135_00387		GUT_GENOME001806_01548	GUT_GENOME096228_03631					GUT_GENOME142628_01424	GUT_GENOME001354_00267								GUT_GENOME207884_01130	GUT_GENOME049240_01038				GUT_GENOME014039_01339	GUT_GENOME001490_02232	GUT_GENOME256521_00395		GUT_GENOME152519_03156	GUT_GENOME199331_00437														GUT_GENOME001023_02005	GUT_GENOME111947_00633
				GUT_GENOME274466_02336	GUT_GENOME096559_02505		GUT_GENOME155679_02038	GUT_GENOME017790_01450					GUT_GENOME230891_00678	GUT_GENOME096551_03405								GUT_GENOME253072_01151	GUT_GENOME103705_02963				GUT_GENOME214106_00022	GUT_GENOME276270_00054	GUT_GENOME143137_01920		GUT_GENOME239737_01780	GUT_GENOME158963_01734														GUT_GENOME103868_01785	GUT_GENOME192801_01714
				GUT_GENOME085442_01575	GUT_GENOME140337_02063		GUT_GENOME007573_01126	GUT_GENOME096386_00209					GUT_GENOME095490_01125	GUT_GENOME231806_01470								GUT_GENOME095997_00954	GUT_GENOME254230_00032				GUT_GENOME218891_00787	GUT_GENOME000563_00459	GUT_GENOME000612_01535		GUT_GENOME143361_04207	GUT_GENOME170432_00532														GUT_GENOME283193_00324	GUT_GENOME098616_00719
				GUT_GENOME096402_02250	GUT_GENOME232032_03887			GUT_GENOME096256_03013					GUT_GENOME171683_00702	GUT_GENOME103762_01103								GUT_GENOME103765_00010	GUT_GENOME231397_02954				GUT_GENOME271908_01426	GUT_GENOME145695_02722	GUT_GENOME095995_03106		GUT_GENOME143497_03312	GUT_GENOME237445_01432														GUT_GENOME258823_01137	GUT_GENOME237201_01247
				GUT_GENOME010448_00048	GUT_GENOME139132_01477			GUT_GENOME143131_02439					GUT_GENOME000578_00705	GUT_GENOME158484_01713								GUT_GENOME283286_01115	GUT_GENOME056730_01380				GUT_GENOME273734_01499	GUT_GENOME163607_02534	GUT_GENOME140104_00529		GUT_GENOME001208_01627	GUT_GENOME249050_01172														GUT_GENOME096393_03945	GUT_GENOME236325_00131
				GUT_GENOME142496_02436	GUT_GENOME234088_01717			GUT_GENOME239710_00308					GUT_GENOME022295_00617	GUT_GENOME276125_00508								GUT_GENOME102353_00481	GUT_GENOME096530_02991				GUT_GENOME143484_02229	GUT_GENOME037885_00217	GUT_GENOME140246_04572		GUT_GENOME105828_01541	GUT_GENOME038289_00958														GUT_GENOME069863_00417	GUT_GENOME119779_00720
				GUT_GENOME264037_00107	GUT_GENOME140601_00174			GUT_GENOME238206_01602					GUT_GENOME024079_00674	GUT_GENOME096505_05319								GUT_GENOME274362_00824	GUT_GENOME143190_00640				GUT_GENOME096080_03559	GUT_GENOME271908_01672	GUT_GENOME147109_02342		GUT_GENOME270508_01088	GUT_GENOME117767_00312														GUT_GENOME139744_00022	GUT_GENOME257483_01139
				GUT_GENOME283050_01395	GUT_GENOME000980_03714			GUT_GENOME024079_02604					GUT_GENOME075103_01704	GUT_GENOME258867_00317								GUT_GENOME277334_00168	GUT_GENOME096295_02069				GUT_GENOME239662_02278	GUT_GENOME231453_00468	GUT_GENOME257725_00638		GUT_GENOME000906_02666	GUT_GENOME139860_02230														GUT_GENOME140602_01235	GUT_GENOME273599_00479
				GUT_GENOME111606_00009	GUT_GENOME140246_01017			GUT_GENOME121711_01446					GUT_GENOME147598_02079	GUT_GENOME095685_01336								GUT_GENOME096556_01006	GUT_GENOME157951_01262				GUT_GENOME143197_01766	GUT_GENOME282720_01362	GUT_GENOME186025_00799		GUT_GENOME244953_01134	GUT_GENOME008492_02005														GUT_GENOME096532_02752	GUT_GENOME214510_00159
				GUT_GENOME141118_00080	GUT_GENOME114679_01806			GUT_GENOME217674_05863					GUT_GENOME149381_01507	GUT_GENOME159262_02708								GUT_GENOME037509_00563	GUT_GENOME001120_03060				GUT_GENOME216302_02160	GUT_GENOME257235_01112	GUT_GENOME273326_00350		GUT_GENOME001046_00390	GUT_GENOME060514_00034														GUT_GENOME096462_02551	GUT_GENOME058339_00502
				GUT_GENOME095336_00355	GUT_GENOME145983_03779			GUT_GENOME250527_01565					GUT_GENOME097684_03911	GUT_GENOME165741_00995								GUT_GENOME236874_01207	GUT_GENOME035519_01614				GUT_GENOME000563_00621	GUT_GENOME018344_00092	GUT_GENOME143633_04149		GUT_GENOME096213_00902	GUT_GENOME142392_02237														GUT_GENOME212645_01396	GUT_GENOME188058_01298
				GUT_GENOME001373_02405	GUT_GENOME113610_00758			GUT_GENOME246421_02932					GUT_GENOME194726_00150	GUT_GENOME145695_02037								GUT_GENOME276091_01590	GUT_GENOME022890_01046				GUT_GENOME056730_01485	GUT_GENOME000047_00504	GUT_GENOME078306_00829		GUT_GENOME078054_00710	GUT_GENOME237448_00596														GUT_GENOME140603_01552	GUT_GENOME014039_00376
				GUT_GENOME285134_02174	GUT_GENOME146003_03830			GUT_GENOME096393_03387					GUT_GENOME022295_02486	GUT_GENOME149090_02009								GUT_GENOME231299_02623	GUT_GENOME095967_02946				GUT_GENOME122359_01263	GUT_GENOME283626_00381	GUT_GENOME143506_00554		GUT_GENOME154740_01272	GUT_GENOME096535_01618														GUT_GENOME141727_02196	GUT_GENOME057827_00999
				GUT_GENOME000852_02942	GUT_GENOME261579_00184			GUT_GENOME216297_00254					GUT_GENOME096174_01648	GUT_GENOME103762_03782								GUT_GENOME096559_02708	GUT_GENOME159262_00187				GUT_GENOME013062_01773	GUT_GENOME007499_00208	GUT_GENOME097711_00644		GUT_GENOME265610_00339	GUT_GENOME000760_01574														GUT_GENOME000046_01739	GUT_GENOME096879_03029
				GUT_GENOME232194_00335	GUT_GENOME096557_02278			GUT_GENOME011267_01096					GUT_GENOME001773_01162	GUT_GENOME147524_01379								GUT_GENOME113559_00620	GUT_GENOME000122_00816				GUT_GENOME129462_01082	GUT_GENOME117154_00423	GUT_GENOME141425_01404		GUT_GENOME098710_02010	GUT_GENOME096506_00823														GUT_GENOME147522_02496	GUT_GENOME000572_00719
				GUT_GENOME270175_00395	GUT_GENOME096439_00438			GUT_GENOME095490_00164					GUT_GENOME001635_01922	GUT_GENOME096268_01442								GUT_GENOME140043_03227	GUT_GENOME210691_00417				GUT_GENOME140078_00780	GUT_GENOME095377_01041	GUT_GENOME141054_03935		GUT_GENOME107760_02152	GUT_GENOME095083_01871														GUT_GENOME095996_02495	GUT_GENOME155959_00282
				GUT_GENOME103882_02316	GUT_GENOME097725_01318			GUT_GENOME158621_01234					GUT_GENOME095996_02636	GUT_GENOME239772_00929								GUT_GENOME107760_01939	GUT_GENOME137680_00952				GUT_GENOME095979_03599	GUT_GENOME095967_02665	GUT_GENOME245772_00741		GUT_GENOME239257_01510	GUT_GENOME198844_00952														GUT_GENOME143502_01443	GUT_GENOME140713_01624
				GUT_GENOME196097_00681	GUT_GENOME253443_01681			GUT_GENOME253072_01523					GUT_GENOME198893_01327	GUT_GENOME141284_00873								GUT_GENOME233265_01356	GUT_GENOME141586_01594				GUT_GENOME096286_00302	GUT_GENOME141054_05551	GUT_GENOME095999_01055		GUT_GENOME122359_00443	GUT_GENOME082983_00059														GUT_GENOME096257_00723	GUT_GENOME171567_01856
				GUT_GENOME148088_00201	GUT_GENOME171643_00235			GUT_GENOME098909_00447					GUT_GENOME205964_01443	GUT_GENOME000711_03737								GUT_GENOME259567_01265	GUT_GENOME023591_02091				GUT_GENOME007443_01192	GUT_GENOME004664_01622	GUT_GENOME284003_00887		GUT_GENOME007443_00915	GUT_GENOME249859_01688														GUT_GENOME096465_01464	GUT_GENOME027393_00650
				GUT_GENOME201992_00191	GUT_GENOME146010_02045			GUT_GENOME212983_01257					GUT_GENOME199128_02306	GUT_GENOME237879_01253								GUT_GENOME111729_00039	GUT_GENOME037509_01113				GUT_GENOME017394_02427	GUT_GENOME214946_01851	GUT_GENOME273734_01499		GUT_GENOME253114_00867	GUT_GENOME279992_00524														GUT_GENOME155713_00449	GUT_GENOME096443_01767
				GUT_GENOME244427_00742	GUT_GENOME000029_02741			GUT_GENOME115597_02053					GUT_GENOME118160_02361	GUT_GENOME096244_00934								GUT_GENOME108993_03959	GUT_GENOME087442_00429				GUT_GENOME018156_01944	GUT_GENOME147612_01574	GUT_GENOME096532_04149		GUT_GENOME207475_00178	GUT_GENOME096526_01022														GUT_GENOME222400_00864	GUT_GENOME137451_00604
				GUT_GENOME116897_02347	GUT_GENOME096273_00002			GUT_GENOME133372_00811					GUT_GENOME015763_00562	GUT_GENOME082811_00289								GUT_GENOME001255_00213	GUT_GENOME280367_00585				GUT_GENOME044732_00259	GUT_GENOME180992_00733	GUT_GENOME000152_01424		GUT_GENOME143137_03316	GUT_GENOME143137_00708														GUT_GENOME009769_01015	GUT_GENOME095962_00998
				GUT_GENOME096213_00394	GUT_GENOME193126_01202			GUT_GENOME251543_00401					GUT_GENOME176098_00678	GUT_GENOME128278_00120								GUT_GENOME253072_02658	GUT_GENOME001255_04463				GUT_GENOME129440_01462	GUT_GENOME103765_02137	GUT_GENOME095001_01157		GUT_GENOME008347_00825	GUT_GENOME019343_00222														GUT_GENOME143723_02884	GUT_GENOME096534_03199
				GUT_GENOME096384_03448	GUT_GENOME001870_01865			GUT_GENOME022861_00967					GUT_GENOME001135_00307	GUT_GENOME142590_00046								GUT_GENOME000594_00949	GUT_GENOME024263_00977				GUT_GENOME258883_01123	GUT_GENOME255999_02559	GUT_GENOME000563_00621		GUT_GENOME020414_02247	GUT_GENOME096189_05915														GUT_GENOME005683_01284	GUT_GENOME096049_01527
				GUT_GENOME096543_03108	GUT_GENOME100613_01584			GUT_GENOME243939_00379					GUT_GENOME247791_01972	GUT_GENOME017455_01357								GUT_GENOME250439_00213	GUT_GENOME039172_00390				GUT_GENOME096543_02834	GUT_GENOME263030_00374	GUT_GENOME095707_00714		GUT_GENOME103893_02587	GUT_GENOME268227_01125														GUT_GENOME018684_00186	GUT_GENOME096385_02525
				GUT_GENOME140065_00873	GUT_GENOME001681_01128			GUT_GENOME277672_00293					GUT_GENOME231431_00354	GUT_GENOME017455_00441								GUT_GENOME262194_00987	GUT_GENOME112384_00470				GUT_GENOME244811_01039	GUT_GENOME096172_01136	GUT_GENOME018344_00667		GUT_GENOME143502_00754	GUT_GENOME140272_01351														GUT_GENOME125072_00027	GUT_GENOME001831_03213
				GUT_GENOME110757_01476	GUT_GENOME096508_00222			GUT_GENOME095981_00648					GUT_GENOME096083_01661	GUT_GENOME208213_02328								GUT_GENOME201325_00266	GUT_GENOME007518_00928				GUT_GENOME001341_00760	GUT_GENOME097737_01291	GUT_GENOME000558_01883		GUT_GENOME015836_01687	GUT_GENOME005886_02442														GUT_GENOME251709_00707	GUT_GENOME141005_02124
				GUT_GENOME234088_00168	GUT_GENOME100276_02819			GUT_GENOME000706_00525					GUT_GENOME048143_01995	GUT_GENOME275347_00820								GUT_GENOME217674_05064	GUT_GENOME143131_00344				GUT_GENOME147678_01787	GUT_GENOME205964_02834	GUT_GENOME251867_00922		GUT_GENOME143751_03943	GUT_GENOME091547_00945														GUT_GENOME001738_00405	GUT_GENOME142610_04215
				GUT_GENOME140411_00385	GUT_GENOME237494_01163			GUT_GENOME117154_01886					GUT_GENOME235498_00721	GUT_GENOME090533_01924								GUT_GENOME140245_00143	GUT_GENOME113868_01681				GUT_GENOME253287_02435	GUT_GENOME085056_01322	GUT_GENOME243569_00362		GUT_GENOME111584_00268	GUT_GENOME283775_02141														GUT_GENOME207411_01082	GUT_GENOME000246_01966
				GUT_GENOME140826_02657	GUT_GENOME000568_02066			GUT_GENOME000035_00874					GUT_GENOME115935_00661	GUT_GENOME257069_01741								GUT_GENOME235150_00287	GUT_GENOME121462_01881				GUT_GENOME143232_04487	GUT_GENOME096217_02072	GUT_GENOME119503_00007		GUT_GENOME087442_00568	GUT_GENOME231250_04763														GUT_GENOME000534_01904	GUT_GENOME234915_00780
				GUT_GENOME108995_00988	GUT_GENOME000338_02731			GUT_GENOME096556_02469					GUT_GENOME005654_00446	GUT_GENOME215875_02295								GUT_GENOME000554_03303	GUT_GENOME029137_00920				GUT_GENOME096292_01583	GUT_GENOME145378_00837	GUT_GENOME096559_03429		GUT_GENOME143379_03483	GUT_GENOME128517_01320														GUT_GENOME232082_01035	GUT_GENOME157376_00482
				GUT_GENOME231247_02588	GUT_GENOME137438_01475			GUT_GENOME139895_00528					GUT_GENOME095850_01305	GUT_GENOME096384_01158								GUT_GENOME103705_03725	GUT_GENOME266133_00478				GUT_GENOME007807_00176	GUT_GENOME155679_01772	GUT_GENOME238305_01789		GUT_GENOME239789_00325	GUT_GENOME094068_01486														GUT_GENOME143282_00627	GUT_GENOME275592_00610
				GUT_GENOME260294_01258	GUT_GENOME139849_00833			GUT_GENOME142390_00451					GUT_GENOME095352_01264	GUT_GENOME096525_01037								GUT_GENOME096819_01420	GUT_GENOME199169_00962				GUT_GENOME096573_00183	GUT_GENOME096217_00712	GUT_GENOME260001_01560		GUT_GENOME095999_02215	GUT_GENOME256853_01158														GUT_GENOME282114_01894	GUT_GENOME009692_00656
				GUT_GENOME170556_00941	GUT_GENOME261579_01469			GUT_GENOME266481_01667					GUT_GENOME164255_01042	GUT_GENOME142458_00734								GUT_GENOME243241_01183	GUT_GENOME142594_02746				GUT_GENOME258258_01028	GUT_GENOME017828_00223	GUT_GENOME018127_00087		GUT_GENOME283113_00325	GUT_GENOME093619_00992														GUT_GENOME000327_02005	GUT_GENOME284603_00444
				GUT_GENOME000583_01896	GUT_GENOME200288_04954			GUT_GENOME234656_01206					GUT_GENOME001255_00138	GUT_GENOME024743_01116								GUT_GENOME022484_02702	GUT_GENOME025611_02543				GUT_GENOME276506_01819	GUT_GENOME231920_00233	GUT_GENOME143519_01122		GUT_GENOME082800_01418	GUT_GENOME082800_00713														GUT_GENOME183774_00237	GUT_GENOME243299_00167
				GUT_GENOME126570_01377	GUT_GENOME122227_00736			GUT_GENOME235150_00564					GUT_GENOME271118_00783	GUT_GENOME140270_01859								GUT_GENOME105301_00875	GUT_GENOME285832_00363				GUT_GENOME140076_00798	GUT_GENOME001757_00472	GUT_GENOME268665_01665		GUT_GENOME155913_00575	GUT_GENOME094321_01724														GUT_GENOME237449_00272	GUT_GENOME120882_00321
				GUT_GENOME143711_03514	GUT_GENOME141005_02844			GUT_GENOME069692_01755					GUT_GENOME158484_01713	GUT_GENOME153241_00343								GUT_GENOME096513_00352	GUT_GENOME215224_01664				GUT_GENOME001506_00109	GUT_GENOME097987_00491	GUT_GENOME096381_05550		GUT_GENOME001779_00374	GUT_GENOME076493_00581														GUT_GENOME096509_01635	GUT_GENOME000568_01981
				GUT_GENOME265265_00879	GUT_GENOME153023_00559			GUT_GENOME142596_02149					GUT_GENOME001147_03140	GUT_GENOME000047_00765								GUT_GENOME256714_01503	GUT_GENOME080486_01373				GUT_GENOME250360_00234	GUT_GENOME098042_02592	GUT_GENOME000133_04419		GUT_GENOME190811_00801	GUT_GENOME134271_00249														GUT_GENOME155703_02116	GUT_GENOME238494_01998
				GUT_GENOME139859_00438	GUT_GENOME000141_01724			GUT_GENOME000572_01043					GUT_GENOME212287_00510	GUT_GENOME142610_02222								GUT_GENOME149574_01254	GUT_GENOME237440_00011				GUT_GENOME225784_00098	GUT_GENOME140003_00522	GUT_GENOME275835_01815		GUT_GENOME237868_00386	GUT_GENOME244875_01894														GUT_GENOME113237_00854	GUT_GENOME156224_01118
				GUT_GENOME172376_00431	GUT_GENOME002382_04518			GUT_GENOME260703_00579					GUT_GENOME145695_02037	GUT_GENOME000899_02205								GUT_GENOME000944_03183	GUT_GENOME133372_00999				GUT_GENOME101260_01838	GUT_GENOME217674_00917	GUT_GENOME063091_01453		GUT_GENOME199169_00641	GUT_GENOME061534_02350														GUT_GENOME000509_00181	GUT_GENOME115017_00769
				GUT_GENOME096491_01979	GUT_GENOME143189_01226			GUT_GENOME094937_02649					GUT_GENOME159262_02708	GUT_GENOME236194_01391								GUT_GENOME140245_02958	GUT_GENOME000594_02890				GUT_GENOME096294_02573	GUT_GENOME018981_01794	GUT_GENOME063562_00064		GUT_GENOME157276_01171	GUT_GENOME103864_00576														GUT_GENOME236237_00926	GUT_GENOME260250_00489
				GUT_GENOME207259_01376	GUT_GENOME171682_04547			GUT_GENOME113507_01099					GUT_GENOME002158_01487	GUT_GENOME259155_01595								GUT_GENOME149380_01556	GUT_GENOME100290_01002				GUT_GENOME000655_01418	GUT_GENOME095995_01891	GUT_GENOME213666_02234		GUT_GENOME067866_00859	GUT_GENOME096496_01189														GUT_GENOME094063_01255	GUT_GENOME005153_00321
				GUT_GENOME005405_00226	GUT_GENOME143727_00477			GUT_GENOME034955_00415					GUT_GENOME000221_02635	GUT_GENOME007607_01726								GUT_GENOME103863_02432	GUT_GENOME022484_01693				GUT_GENOME152999_00612	GUT_GENOME245287_01855	GUT_GENOME239280_00375		GUT_GENOME091092_00670	GUT_GENOME234270_01257														GUT_GENOME029780_00453	GUT_GENOME113599_00501
				GUT_GENOME095973_01088	GUT_GENOME239028_01993			GUT_GENOME134977_00181					GUT_GENOME147524_01379	GUT_GENOME258847_02514								GUT_GENOME236889_01904	GUT_GENOME257298_01376				GUT_GENOME095971_01527	GUT_GENOME080351_00869	GUT_GENOME096399_00395		GUT_GENOME231670_00719	GUT_GENOME001587_02953														GUT_GENOME284658_00099	GUT_GENOME096036_00366
				GUT_GENOME000624_01408	GUT_GENOME177471_00329			GUT_GENOME238305_00643					GUT_GENOME239772_00929	GUT_GENOME176035_01927								GUT_GENOME246421_00495	GUT_GENOME275829_01171				GUT_GENOME276542_01914	GUT_GENOME283627_01226	GUT_GENOME207399_00537		GUT_GENOME143711_03939	GUT_GENOME070996_00827														GUT_GENOME212260_01222	GUT_GENOME095021_00678
				GUT_GENOME119503_00407	GUT_GENOME000187_00016			GUT_GENOME009103_00712					GUT_GENOME237879_01253	GUT_GENOME217823_01475								GUT_GENOME222694_01363	GUT_GENOME000122_01914				GUT_GENOME095979_02722	GUT_GENOME141089_02668	GUT_GENOME276506_01819		GUT_GENOME098791_01107	GUT_GENOME207341_00817														GUT_GENOME117767_03129	GUT_GENOME261488_00648
				GUT_GENOME096496_02886	GUT_GENOME033115_01745			GUT_GENOME009602_00179					GUT_GENOME120108_02132	GUT_GENOME001364_01165								GUT_GENOME001418_01590	GUT_GENOME218838_01828				GUT_GENOME255980_01382	GUT_GENOME215548_00211	GUT_GENOME067136_01837		GUT_GENOME226303_00341	GUT_GENOME140340_01290														GUT_GENOME143749_01275	GUT_GENOME104878_00609
				GUT_GENOME213063_00240	GUT_GENOME232032_01000			GUT_GENOME276949_01336					GUT_GENOME219276_01815	GUT_GENOME096518_00121								GUT_GENOME140240_01154	GUT_GENOME274911_01570				GUT_GENOME001773_00374	GUT_GENOME213063_00616	GUT_GENOME257836_00896		GUT_GENOME062339_00415	GUT_GENOME078034_00449														GUT_GENOME208102_01706	GUT_GENOME212278_00887
				GUT_GENOME000420_02870	GUT_GENOME112066_00894			GUT_GENOME242920_01072					GUT_GENOME147612_00699	GUT_GENOME001309_01576								GUT_GENOME102353_02708	GUT_GENOME254096_01861				GUT_GENOME237529_00746	GUT_GENOME042972_00374	GUT_GENOME257679_02444		GUT_GENOME015301_01494	GUT_GENOME009602_00361														GUT_GENOME116624_00002	GUT_GENOME026008_00304
				GUT_GENOME177471_00074	GUT_GENOME143379_03198			GUT_GENOME069755_00975					GUT_GENOME141059_02159	GUT_GENOME141698_00877								GUT_GENOME138841_00374	GUT_GENOME096294_04471				GUT_GENOME216940_01366	GUT_GENOME143191_01454	GUT_GENOME143498_02132		GUT_GENOME251712_01088	GUT_GENOME269664_01963														GUT_GENOME018858_00189	GUT_GENOME203874_01115
				GUT_GENOME231453_03401	GUT_GENOME087180_00500			GUT_GENOME115127_00790					GUT_GENOME219449_01275	GUT_GENOME000022_00508								GUT_GENOME000133_02620	GUT_GENOME063926_01113				GUT_GENOME259135_01625	GUT_GENOME000243_01488	GUT_GENOME000727_02184		GUT_GENOME209482_00607	GUT_GENOME117373_00314														GUT_GENOME096269_02785	GUT_GENOME095001_01707
				GUT_GENOME142418_02523	GUT_GENOME096563_00764			GUT_GENOME096670_02322					GUT_GENOME182311_01910	GUT_GENOME271908_01813								GUT_GENOME000221_00744	GUT_GENOME140808_03688				GUT_GENOME001745_03234	GUT_GENOME197012_00551	GUT_GENOME252836_00399		GUT_GENOME000963_00395	GUT_GENOME142490_00187														GUT_GENOME125875_01415	GUT_GENOME255999_02539
				GUT_GENOME244383_00601	GUT_GENOME176629_00331			GUT_GENOME253065_00245					GUT_GENOME095490_00793	GUT_GENOME001376_01461								GUT_GENOME000545_01663	GUT_GENOME061534_00463				GUT_GENOME138139_00058	GUT_GENOME243585_00971	GUT_GENOME194757_01211		GUT_GENOME001770_00980	GUT_GENOME158963_01550														GUT_GENOME116636_00371	GUT_GENOME176407_00840
				GUT_GENOME142396_03016	GUT_GENOME006298_01183			GUT_GENOME269304_00412					GUT_GENOME143131_00632	GUT_GENOME095592_04258								GUT_GENOME284693_00977	GUT_GENOME257383_00056				GUT_GENOME226303_02031	GUT_GENOME097975_00701	GUT_GENOME146008_04099		GUT_GENOME146008_01590	GUT_GENOME127497_00551														GUT_GENOME110757_01456	GUT_GENOME000575_02671
				GUT_GENOME153344_00595	GUT_GENOME194757_02936			GUT_GENOME016361_01855					GUT_GENOME096170_00616	GUT_GENOME107146_01342								GUT_GENOME143232_00950	GUT_GENOME283937_00007				GUT_GENOME143505_00428	GUT_GENOME019335_01451	GUT_GENOME001440_00909		GUT_GENOME147138_03034	GUT_GENOME256503_01537														GUT_GENOME096270_04202	GUT_GENOME281121_01205
				GUT_GENOME090533_01934	GUT_GENOME000469_02577			GUT_GENOME140314_00249					GUT_GENOME000192_00007	GUT_GENOME129323_00040								GUT_GENOME254230_01485	GUT_GENOME084946_00198				GUT_GENOME000513_02337	GUT_GENOME000001_00830	GUT_GENOME258258_00137		GUT_GENOME239280_00694	GUT_GENOME000931_01031														GUT_GENOME096375_00017	GUT_GENOME253903_02367
				GUT_GENOME001122_00656	GUT_GENOME141727_00351			GUT_GENOME056716_00132					GUT_GENOME171392_00371	GUT_GENOME000319_02215								GUT_GENOME013049_00769	GUT_GENOME076000_00674				GUT_GENOME090701_00944	GUT_GENOME111977_01024	GUT_GENOME175792_00162		GUT_GENOME011515_00079	GUT_GENOME105006_00879														GUT_GENOME157273_00969	GUT_GENOME023482_00169
				GUT_GENOME070485_00081	GUT_GENOME142587_01478			GUT_GENOME007573_01126					GUT_GENOME096168_01579	GUT_GENOME142457_01975								GUT_GENOME024263_00021	GUT_GENOME252977_00125				GUT_GENOME000035_02873	GUT_GENOME007607_01626	GUT_GENOME096522_00465		GUT_GENOME070485_02888	GUT_GENOME215793_01191														GUT_GENOME007513_00936	GUT_GENOME176043_00565
				GUT_GENOME101256_00195	GUT_GENOME109620_00887			GUT_GENOME009558_00416					GUT_GENOME000655_02458	GUT_GENOME171597_00832								GUT_GENOME163027_00013	GUT_GENOME143346_00450				GUT_GENOME096228_03888	GUT_GENOME161205_01313	GUT_GENOME000753_00510		GUT_GENOME140235_01558	GUT_GENOME098313_01175														GUT_GENOME105882_00887	GUT_GENOME096560_03189
				GUT_GENOME096378_01290	GUT_GENOME103557_01371								GUT_GENOME000219_00300	GUT_GENOME096373_01459								GUT_GENOME000513_02862	GUT_GENOME283543_01247				GUT_GENOME097844_00340	GUT_GENOME197557_00227	GUT_GENOME151778_00086		GUT_GENOME103557_00238	GUT_GENOME216778_00113														GUT_GENOME097055_00139	GUT_GENOME147138_00722
				GUT_GENOME258514_00583	GUT_GENOME145698_00950								GUT_GENOME285797_00020	GUT_GENOME095650_01430								GUT_GENOME152489_00084	GUT_GENOME254202_01793				GUT_GENOME000295_01089	GUT_GENOME099131_00301	GUT_GENOME096302_00893		GUT_GENOME020414_00340	GUT_GENOME157290_00176														GUT_GENOME011146_01397	GUT_GENOME140365_01024
				GUT_GENOME156063_01437	GUT_GENOME116934_00143								GUT_GENOME096067_00331	GUT_GENOME140345_00846								GUT_GENOME115272_00972	GUT_GENOME065882_00020				GUT_GENOME008742_01042	GUT_GENOME070485_03733	GUT_GENOME282223_00334		GUT_GENOME000629_00978	GUT_GENOME213434_01704														GUT_GENOME013505_00114	GUT_GENOME108684_02084
				GUT_GENOME122482_01190	GUT_GENOME128621_00835								GUT_GENOME256155_01520	GUT_GENOME000279_00672								GUT_GENOME254490_00456	GUT_GENOME239725_01232				GUT_GENOME140299_00984	GUT_GENOME151535_01649	GUT_GENOME000308_01606		GUT_GENOME143156_00646	GUT_GENOME000152_02396														GUT_GENOME137156_00626	GUT_GENOME278353_01022
				GUT_GENOME247084_02461	GUT_GENOME149574_01971								GUT_GENOME095520_00272	GUT_GENOME096004_01608								GUT_GENOME217674_01446	GUT_GENOME112856_02237				GUT_GENOME013062_01604	GUT_GENOME097975_00548	GUT_GENOME172942_02117		GUT_GENOME075103_01355	GUT_GENOME052375_00426														GUT_GENOME096295_01608	GUT_GENOME085736_01701
				GUT_GENOME077706_02328	GUT_GENOME172958_00720								GUT_GENOME095971_01522	GUT_GENOME177196_01529								GUT_GENOME000963_02511	GUT_GENOME284447_01604				GUT_GENOME096256_00914	GUT_GENOME001831_01407	GUT_GENOME244005_01527		GUT_GENOME164255_00553	GUT_GENOME157195_02061														GUT_GENOME286320_00413	GUT_GENOME258656_00676
				GUT_GENOME155164_01865	GUT_GENOME103863_02380								GUT_GENOME212278_01486	GUT_GENOME140393_00408								GUT_GENOME140299_01831	GUT_GENOME000725_03799				GUT_GENOME238979_02749	GUT_GENOME022295_00362	GUT_GENOME237839_00704		GUT_GENOME024514_01892	GUT_GENOME095986_05727														GUT_GENOME097946_02018	GUT_GENOME170510_00018
				GUT_GENOME140246_01152	GUT_GENOME207955_03220								GUT_GENOME000047_00765	GUT_GENOME096431_03847								GUT_GENOME258883_02699	GUT_GENOME078848_00413				GUT_GENOME095991_01371	GUT_GENOME215200_00646	GUT_GENOME132069_01631		GUT_GENOME095296_02582	GUT_GENOME017704_01196														GUT_GENOME000272_00541	GUT_GENOME000106_02288
				GUT_GENOME103863_02110	GUT_GENOME264873_00274								GUT_GENOME001316_01161	GUT_GENOME151520_00036								GUT_GENOME157833_00378	GUT_GENOME137438_01632				GUT_GENOME109512_01352	GUT_GENOME065576_00102	GUT_GENOME226303_02031		GUT_GENOME001598_01048	GUT_GENOME001490_00028														GUT_GENOME154740_00070	GUT_GENOME227837_01315
				GUT_GENOME207866_00593	GUT_GENOME002382_05192								GUT_GENOME096556_02433	GUT_GENOME014048_00566								GUT_GENOME096240_01676	GUT_GENOME010945_00538				GUT_GENOME276476_00811	GUT_GENOME096246_02813	GUT_GENOME095992_00945		GUT_GENOME000767_01394	GUT_GENOME238401_00239														GUT_GENOME065434_01874	GUT_GENOME096406_02377
				GUT_GENOME261579_01937	GUT_GENOME141436_03722								GUT_GENOME001115_00470	GUT_GENOME096533_02481								GUT_GENOME258721_03651	GUT_GENOME140330_01054				GUT_GENOME195293_00920	GUT_GENOME235903_02534	GUT_GENOME095978_00168		GUT_GENOME095983_02093	GUT_GENOME125072_01399														GUT_GENOME237335_00240	GUT_GENOME277097_01106
				GUT_GENOME141371_03397	GUT_GENOME096529_01497								GUT_GENOME283627_00075	GUT_GENOME133541_00386								GUT_GENOME245362_01930	GUT_GENOME237426_01304				GUT_GENOME143131_03088	GUT_GENOME212972_00532	GUT_GENOME044241_01306		GUT_GENOME147168_00106	GUT_GENOME140337_01012														GUT_GENOME232220_01552	GUT_GENOME000152_00912
				GUT_GENOME096075_01262	GUT_GENOME006956_00724								GUT_GENOME095186_00273	GUT_GENOME096271_00757								GUT_GENOME274864_00095	GUT_GENOME101636_01116				GUT_GENOME214946_01793	GUT_GENOME103751_00125	GUT_GENOME244966_01418		GUT_GENOME232008_00162	GUT_GENOME155926_00908														GUT_GENOME038202_02313	GUT_GENOME286887_01464
				GUT_GENOME268758_00541	GUT_GENOME249375_00507								GUT_GENOME019103_00535	GUT_GENOME140601_01698								GUT_GENOME105885_00288	GUT_GENOME257096_00564				GUT_GENOME140240_01173	GUT_GENOME212317_01739	GUT_GENOME133372_01395		GUT_GENOME093820_01093	GUT_GENOME164403_01141														GUT_GENOME093910_00421	GUT_GENOME114313_00617
				GUT_GENOME096384_03772	GUT_GENOME259081_01872								GUT_GENOME001270_02239	GUT_GENOME109620_00177								GUT_GENOME175554_00259	GUT_GENOME000202_01973				GUT_GENOME096201_00165	GUT_GENOME103863_03274	GUT_GENOME000483_04596		GUT_GENOME096246_00047	GUT_GENOME000092_02177														GUT_GENOME130350_00132	GUT_GENOME171445_00478
				GUT_GENOME231920_01627	GUT_GENOME139859_00515								GUT_GENOME254063_00134	GUT_GENOME257450_01797								GUT_GENOME140082_01623	GUT_GENOME000104_01180				GUT_GENOME143211_00193	GUT_GENOME096491_01787	GUT_GENOME239690_05199		GUT_GENOME190811_00473	GUT_GENOME123416_01314														GUT_GENOME237875_02068	GUT_GENOME000024_00665
				GUT_GENOME143497_01190	GUT_GENOME143361_01850								GUT_GENOME096293_01956	GUT_GENOME232032_04344								GUT_GENOME283937_01196	GUT_GENOME258397_01439				GUT_GENOME096203_00498	GUT_GENOME096036_02890	GUT_GENOME096221_03165		GUT_GENOME134977_00523	GUT_GENOME257151_00734														GUT_GENOME143726_01580	GUT_GENOME177425_00234
				GUT_GENOME000259_04530	GUT_GENOME140826_00561								GUT_GENOME000231_00468	GUT_GENOME033647_01258								GUT_GENOME096080_03616	GUT_GENOME094675_02544				GUT_GENOME126719_01431	GUT_GENOME244234_01192	GUT_GENOME096435_02325		GUT_GENOME000236_01015	GUT_GENOME239737_02569														GUT_GENOME078848_01544	GUT_GENOME003569_00817
				GUT_GENOME171356_00646	GUT_GENOME155674_01539								GUT_GENOME208504_00597	GUT_GENOME219276_01258								GUT_GENOME196481_00060	GUT_GENOME239673_03794				GUT_GENOME251243_01322	GUT_GENOME196501_00297	GUT_GENOME007446_00689		GUT_GENOME140411_01998	GUT_GENOME244033_00398														GUT_GENOME000700_01343	GUT_GENOME007974_00344
				GUT_GENOME202528_01384	GUT_GENOME000327_00687								GUT_GENOME140076_03173	GUT_GENOME151017_00126								GUT_GENOME098568_04148	GUT_GENOME001297_01640				GUT_GENOME096201_01017	GUT_GENOME143749_04015	GUT_GENOME270820_00874		GUT_GENOME142496_01377	GUT_GENOME000259_03933														GUT_GENOME239663_03377	GUT_GENOME000237_00270
				GUT_GENOME172942_01214	GUT_GENOME033290_01958								GUT_GENOME156655_01528	GUT_GENOME096283_01087								GUT_GENOME149381_03383	GUT_GENOME131085_01808				GUT_GENOME190117_00798	GUT_GENOME196449_00195	GUT_GENOME153870_00417		GUT_GENOME045630_00040	GUT_GENOME284894_00367														GUT_GENOME108995_02387	GUT_GENOME098242_00874
				GUT_GENOME239789_02420	GUT_GENOME143709_03025								GUT_GENOME191958_01230	GUT_GENOME181333_01655								GUT_GENOME022484_01918	GUT_GENOME040420_01301				GUT_GENOME209325_02142	GUT_GENOME081295_01156	GUT_GENOME032757_00217		GUT_GENOME176629_03836	GUT_GENOME247791_00178														GUT_GENOME143711_01322	GUT_GENOME096470_01651
				GUT_GENOME096298_01016	GUT_GENOME147630_01155								GUT_GENOME152519_02708	GUT_GENOME065657_00013								GUT_GENOME096256_02289	GUT_GENOME017944_01139				GUT_GENOME015599_01414	GUT_GENOME001417_04383	GUT_GENOME008742_01042		GUT_GENOME143760_04578	GUT_GENOME258867_01251														GUT_GENOME082983_00057	GUT_GENOME143411_01406
				GUT_GENOME175197_00397	GUT_GENOME276949_01345								GUT_GENOME089625_01007	GUT_GENOME001022_01119								GUT_GENOME138841_00378	GUT_GENOME239673_03592				GUT_GENOME157191_00885	GUT_GENOME206546_01260	GUT_GENOME141041_02133		GUT_GENOME065321_00091	GUT_GENOME237499_01415														GUT_GENOME137346_01852	GUT_GENOME096075_00610
				GUT_GENOME119191_01521	GUT_GENOME033115_00844								GUT_GENOME212278_00807	GUT_GENOME094321_00128								GUT_GENOME286118_01469	GUT_GENOME257483_01818				GUT_GENOME123416_01324	GUT_GENOME096151_00665	GUT_GENOME143497_01784		GUT_GENOME225807_00427	GUT_GENOME000049_00835														GUT_GENOME183568_02508	GUT_GENOME013046_00617
				GUT_GENOME207955_03974	GUT_GENOME232302_00894								GUT_GENOME271908_01813	GUT_GENOME244968_01368								GUT_GENOME001745_03492	GUT_GENOME234141_01682				GUT_GENOME217674_05707	GUT_GENOME141436_04821	GUT_GENOME096269_02897		GUT_GENOME075528_02416	GUT_GENOME247103_02046														GUT_GENOME111204_00975	GUT_GENOME096425_01839
				GUT_GENOME256714_01515	GUT_GENOME143383_06037								GUT_GENOME233265_00818	GUT_GENOME285651_00120								GUT_GENOME143190_02822	GUT_GENOME000106_00199				GUT_GENOME000554_01659	GUT_GENOME145980_02412	GUT_GENOME143723_02147		GUT_GENOME198893_00034	GUT_GENOME014854_01780														GUT_GENOME096384_00412	GUT_GENOME096217_01237
				GUT_GENOME256763_01483	GUT_GENOME000149_01271								GUT_GENOME140299_02817	GUT_GENOME143724_04265								GUT_GENOME113022_00650	GUT_GENOME096203_03684				GUT_GENOME258847_00195	GUT_GENOME000205_03061	GUT_GENOME200288_05093		GUT_GENOME191958_02412	GUT_GENOME243411_00477														GUT_GENOME149497_00163	GUT_GENOME188425_00253
				GUT_GENOME147598_00294	GUT_GENOME000004_02076								GUT_GENOME258883_00279	GUT_GENOME096269_02626								GUT_GENOME064659_01621	GUT_GENOME231320_03000				GUT_GENOME010933_02019	GUT_GENOME098569_01652	GUT_GENOME096473_01418		GUT_GENOME139744_01012	GUT_GENOME000571_00638														GUT_GENOME025678_01426	GUT_GENOME096293_03424
				GUT_GENOME000572_01141	GUT_GENOME251449_00337								GUT_GENOME110697_01326	GUT_GENOME129168_01169								GUT_GENOME140411_02912	GUT_GENOME190117_02028				GUT_GENOME140808_01182	GUT_GENOME175045_01580	GUT_GENOME022845_01328		GUT_GENOME234656_00682	GUT_GENOME001636_01655														GUT_GENOME232192_04460	GUT_GENOME065630_01714
				GUT_GENOME232218_01684	GUT_GENOME000017_02983								GUT_GENOME229203_01154	GUT_GENOME020805_00865								GUT_GENOME118228_01680	GUT_GENOME251243_01195				GUT_GENOME143502_02063	GUT_GENOME143092_02357	GUT_GENOME046050_02827		GUT_GENOME005404_00519	GUT_GENOME142588_03009														GUT_GENOME244205_01528	GUT_GENOME244339_00955
				GUT_GENOME258198_01247	GUT_GENOME001355_00468								GUT_GENOME283627_00454	GUT_GENOME146003_01071								GUT_GENOME206574_00906	GUT_GENOME002158_02437				GUT_GENOME157951_01529	GUT_GENOME265882_00088	GUT_GENOME237429_00729		GUT_GENOME018957_01760	GUT_GENOME000677_02281														GUT_GENOME170490_00936	GUT_GENOME225173_01577
				GUT_GENOME001401_01909	GUT_GENOME093124_00805								GUT_GENOME140345_00846	GUT_GENOME018964_00558								GUT_GENOME113868_00336	GUT_GENOME236657_00955				GUT_GENOME231397_01469	GUT_GENOME212317_00703	GUT_GENOME096465_01064		GUT_GENOME273772_01448	GUT_GENOME103557_00520														GUT_GENOME000259_03775	GUT_GENOME277044_01706
				GUT_GENOME143751_03838	GUT_GENOME238522_01712								GUT_GENOME285322_00778	GUT_GENOME096505_00155								GUT_GENOME087598_01595	GUT_GENOME000057_03315				GUT_GENOME258823_01345	GUT_GENOME208102_00669	GUT_GENOME158606_02139		GUT_GENOME001779_02155	GUT_GENOME207750_01844														GUT_GENOME021377_00281	GUT_GENOME096559_01076
				GUT_GENOME095996_03344	GUT_GENOME095186_01164								GUT_GENOME059449_01755	GUT_GENOME143711_00508								GUT_GENOME251243_00194	GUT_GENOME198850_01400				GUT_GENOME149380_00588	GUT_GENOME153241_01436	GUT_GENOME232145_00961		GUT_GENOME268227_00166	GUT_GENOME001373_01094														GUT_GENOME005886_00535	GUT_GENOME259872_00210
				GUT_GENOME018848_01344	GUT_GENOME096560_00173								GUT_GENOME001324_00442	GUT_GENOME140808_00618								GUT_GENOME108993_02375	GUT_GENOME236879_01478				GUT_GENOME001778_01489	GUT_GENOME001029_00098	GUT_GENOME142483_00448		GUT_GENOME237438_01753	GUT_GENOME284871_00638														GUT_GENOME178989_00153	GUT_GENOME139627_00869
				GUT_GENOME231670_01625	GUT_GENOME096132_01837								GUT_GENOME096380_00925	GUT_GENOME208016_00964								GUT_GENOME094660_00468	GUT_GENOME261708_02248				GUT_GENOME000944_03623	GUT_GENOME155041_00065	GUT_GENOME120773_00806		GUT_GENOME239538_01360	GUT_GENOME237511_00691														GUT_GENOME129695_00981	GUT_GENOME011051_00417
				GUT_GENOME143137_04397	GUT_GENOME141089_01499								GUT_GENOME000513_01298	GUT_GENOME097946_00978								GUT_GENOME151520_00409	GUT_GENOME000963_05045				GUT_GENOME253287_03285	GUT_GENOME143727_01843	GUT_GENOME096561_02134		GUT_GENOME001027_01244	GUT_GENOME209802_01948														GUT_GENOME095983_00290	GUT_GENOME000530_01689
				GUT_GENOME000067_00343	GUT_GENOME270662_00039								GUT_GENOME122359_03231	GUT_GENOME155926_01666								GUT_GENOME101940_02602	GUT_GENOME142688_01557				GUT_GENOME118228_01689	GUT_GENOME255983_00055	GUT_GENOME142853_01754		GUT_GENOME251721_02009	GUT_GENOME176758_01684														GUT_GENOME231250_02827	GUT_GENOME147525_03596
				GUT_GENOME254490_00499	GUT_GENOME251944_01237								GUT_GENOME133541_00386	GUT_GENOME095599_00558								GUT_GENOME094099_01063	GUT_GENOME237879_00251				GUT_GENOME000187_02944	GUT_GENOME079379_00662	GUT_GENOME005862_00997		GUT_GENOME148095_01395	GUT_GENOME097737_00082														GUT_GENOME096228_03297	GUT_GENOME237880_00371
				GUT_GENOME208942_01747	GUT_GENOME081297_01707								GUT_GENOME141397_00162	GUT_GENOME175935_01144								GUT_GENOME161370_00032	GUT_GENOME000963_04342				GUT_GENOME153591_00504	GUT_GENOME215855_00992	GUT_GENOME202428_00030		GUT_GENOME000662_01040	GUT_GENOME000248_02502														GUT_GENOME251944_00367	GUT_GENOME103754_00419
				GUT_GENOME114313_00643	GUT_GENOME130348_01105								GUT_GENOME251721_01389	GUT_GENOME142485_01753								GUT_GENOME123625_00655	GUT_GENOME102829_00329				GUT_GENOME000221_03760	GUT_GENOME218730_00808	GUT_GENOME013505_02307		GUT_GENOME252841_00951	GUT_GENOME078217_00625														GUT_GENOME096383_00870	GUT_GENOME260294_02187
				GUT_GENOME097844_00679	GUT_GENOME137688_00053								GUT_GENOME029877_02044	GUT_GENOME096281_00939								GUT_GENOME005654_01823	GUT_GENOME000963_03289				GUT_GENOME143131_00386	GUT_GENOME025653_01868	GUT_GENOME175326_00601		GUT_GENOME076000_00258	GUT_GENOME234569_00240														GUT_GENOME123416_00496	GUT_GENOME096548_00608
				GUT_GENOME231257_01054	GUT_GENOME237530_00347								GUT_GENOME109620_00177	GUT_GENOME134977_01682								GUT_GENOME115935_01903	GUT_GENOME139906_01060				GUT_GENOME000189_00020	GUT_GENOME156244_01593	GUT_GENOME096201_01017		GUT_GENOME139388_02530	GUT_GENOME121711_01446														GUT_GENOME114602_00144	GUT_GENOME096480_02179
				GUT_GENOME125250_00268	GUT_GENOME172942_02124								GUT_GENOME209325_00109	GUT_GENOME153913_00900								GUT_GENOME096210_02424	GUT_GENOME010023_02054				GUT_GENOME084706_00494	GUT_GENOME143484_04243	GUT_GENOME033131_01259		GUT_GENOME251083_00740	GUT_GENOME157276_01563														GUT_GENOME096262_00973	GUT_GENOME157119_00287
				GUT_GENOME121215_00701	GUT_GENOME239700_01614								GUT_GENOME106027_01214	GUT_GENOME255276_00775								GUT_GENOME096366_02180	GUT_GENOME017813_00512				GUT_GENOME217674_03095	GUT_GENOME100290_01789	GUT_GENOME234296_00897		GUT_GENOME147523_00394	GUT_GENOME220794_00189														GUT_GENOME260293_01361	GUT_GENOME189814_02092
				GUT_GENOME096467_02671	GUT_GENOME096546_01315								GUT_GENOME001745_00446	GUT_GENOME145980_01233								GUT_GENOME001745_00347	GUT_GENOME130350_01316				GUT_GENOME001177_03312	GUT_GENOME130358_01025	GUT_GENOME239280_01977		GUT_GENOME283609_00788	GUT_GENOME129440_00010														GUT_GENOME238262_00639	GUT_GENOME191311_01431
				GUT_GENOME163027_00131	GUT_GENOME225024_01094								GUT_GENOME232032_04344	GUT_GENOME078054_00351								GUT_GENOME156244_01270	GUT_GENOME217799_00478				GUT_GENOME255709_00880	GUT_GENOME158837_00874	GUT_GENOME096124_04197		GUT_GENOME270564_02287	GUT_GENOME286625_01022														GUT_GENOME098791_02197	GUT_GENOME142586_02281
				GUT_GENOME140043_03332	GUT_GENOME095296_01158								GUT_GENOME117621_02353	GUT_GENOME096472_03178								GUT_GENOME112384_01262	GUT_GENOME231257_01439				GUT_GENOME027824_00848	GUT_GENOME263030_00256	GUT_GENOME141371_02706		GUT_GENOME173058_00445	GUT_GENOME000030_00961														GUT_GENOME140053_00653	GUT_GENOME096172_00402
				GUT_GENOME009334_00719	GUT_GENOME013112_00576								GUT_GENOME266481_01251	GUT_GENOME018782_00090								GUT_GENOME231397_02336	GUT_GENOME057155_02565				GUT_GENOME096083_00877	GUT_GENOME000554_03021	GUT_GENOME115419_00224		GUT_GENOME185532_03656	GUT_GENOME216297_00254														GUT_GENOME103721_00119	GUT_GENOME045758_03053
				GUT_GENOME239737_02389	GUT_GENOME138841_01303								GUT_GENOME096063_00422	GUT_GENOME000682_01587								GUT_GENOME143724_04834	GUT_GENOME000944_04269				GUT_GENOME147612_01081	GUT_GENOME159493_01492	GUT_GENOME007711_01334		GUT_GENOME217432_00654	GUT_GENOME022861_01341														GUT_GENOME269084_01795	GUT_GENOME096069_00266
				GUT_GENOME208102_00075	GUT_GENOME096228_01888								GUT_GENOME075582_00385	GUT_GENOME198844_01585								GUT_GENOME022007_00490	GUT_GENOME095943_00119				GUT_GENOME097975_02255	GUT_GENOME119949_01696	GUT_GENOME143197_01449		GUT_GENOME143346_02959	GUT_GENOME011267_01096														GUT_GENOME227599_01449	GUT_GENOME009698_01320
				GUT_GENOME001120_01129	GUT_GENOME000852_03396								GUT_GENOME095352_00830	GUT_GENOME016749_01108								GUT_GENOME263189_00883	GUT_GENOME096525_02677				GUT_GENOME276476_01450	GUT_GENOME248633_00901	GUT_GENOME285666_00715		GUT_GENOME001208_00136	GUT_GENOME096538_01063														GUT_GENOME142395_00410	GUT_GENOME238401_00080
				GUT_GENOME103856_02584	GUT_GENOME258883_02273								GUT_GENOME101940_00426	GUT_GENOME142610_00405								GUT_GENOME103749_03793	GUT_GENOME000727_00269				GUT_GENOME095971_01608	GUT_GENOME103766_00872	GUT_GENOME001417_00110		GUT_GENOME001239_01131	GUT_GENOME096442_03901														GUT_GENOME129462_01435	GUT_GENOME095986_03566
				GUT_GENOME222694_00338	GUT_GENOME096269_01827								GUT_GENOME142525_00199	GUT_GENOME000131_00586								GUT_GENOME069124_01078	GUT_GENOME133372_00165				GUT_GENOME275347_00747	GUT_GENOME174465_02201	GUT_GENOME085736_00661		GUT_GENOME045693_01477	GUT_GENOME257450_00246														GUT_GENOME143752_02387	GUT_GENOME140270_03828
				GUT_GENOME121272_00943	GUT_GENOME096541_02723								GUT_GENOME118188_00638	GUT_GENOME000508_00662								GUT_GENOME108995_00145	GUT_GENOME009209_00009				GUT_GENOME096203_04365	GUT_GENOME214946_00025	GUT_GENOME112210_01375		GUT_GENOME140345_01079	GUT_GENOME155703_02301														GUT_GENOME157191_01081	GUT_GENOME050033_00421
				GUT_GENOME232404_02034	GUT_GENOME243585_03918								GUT_GENOME140240_03399	GUT_GENOME143527_03594								GUT_GENOME002158_02156	GUT_GENOME138841_02173				GUT_GENOME217674_01884	GUT_GENOME005565_00421	GUT_GENOME149090_01045		GUT_GENOME000128_01147	GUT_GENOME158621_01234														GUT_GENOME096513_00291	GUT_GENOME096291_01751
				GUT_GENOME002382_00266	GUT_GENOME243939_01228								GUT_GENOME047123_01417	GUT_GENOME164334_02801								GUT_GENOME263189_02535	GUT_GENOME094995_00791				GUT_GENOME109102_00614	GUT_GENOME257278_02770	GUT_GENOME258823_01345		GUT_GENOME243928_01058	GUT_GENOME242920_01452														GUT_GENOME155428_00212	GUT_GENOME253419_00610
				GUT_GENOME000496_02512	GUT_GENOME095978_00443								GUT_GENOME001488_00558	GUT_GENOME191265_00718								GUT_GENOME103766_03831	GUT_GENOME155674_01592				GUT_GENOME025525_00111	GUT_GENOME000285_02110	GUT_GENOME142625_02325		GUT_GENOME192985_00032	GUT_GENOME261061_01777														GUT_GENOME044018_01570	GUT_GENOME000200_01772
				GUT_GENOME022512_00851	GUT_GENOME257017_00472								GUT_GENOME155913_00588	GUT_GENOME076493_01538								GUT_GENOME098710_02436	GUT_GENOME096286_01279				GUT_GENOME263189_02951	GUT_GENOME192714_01251	GUT_GENOME236874_00241		GUT_GENOME033875_01870	GUT_GENOME098909_00447														GUT_GENOME143747_00798	GUT_GENOME266586_01337
				GUT_GENOME231555_01128	GUT_GENOME016875_01133								GUT_GENOME140240_02767	GUT_GENOME269003_00411								GUT_GENOME000659_02709	GUT_GENOME096560_04213				GUT_GENOME001120_02926	GUT_GENOME125783_01524	GUT_GENOME254943_00324		GUT_GENOME103882_01996	GUT_GENOME096531_00670														GUT_GENOME111392_01580	GUT_GENOME151671_00966
				GUT_GENOME232192_02887	GUT_GENOME183802_01335								GUT_GENOME263950_01387	GUT_GENOME097711_01965								GUT_GENOME263189_00830	GUT_GENOME238256_01446				GUT_GENOME146010_01964	GUT_GENOME115419_01064	GUT_GENOME010056_00614		GUT_GENOME013810_00843	GUT_GENOME095967_02400														GUT_GENOME140315_02605	GUT_GENOME141586_00039
				GUT_GENOME094938_00195	GUT_GENOME000623_00192								GUT_GENOME143724_04265	GUT_GENOME244177_00654								GUT_GENOME002158_02468	GUT_GENOME278390_01260				GUT_GENOME002158_01084	GUT_GENOME143505_00696	GUT_GENOME269798_00959		GUT_GENOME237201_00667	GUT_GENOME141054_03589														GUT_GENOME232438_00076	GUT_GENOME117118_01477
				GUT_GENOME243145_00144	GUT_GENOME140352_00886								GUT_GENOME253287_03399	GUT_GENOME000319_02640								GUT_GENOME096511_03290	GUT_GENOME017938_00806				GUT_GENOME245766_00609	GUT_GENOME096473_04757	GUT_GENOME245427_01228		GUT_GENOME128888_00218	GUT_GENOME025591_00064														GUT_GENOME141727_04439	GUT_GENOME000094_00649
				GUT_GENOME171597_02453	GUT_GENOME001135_03068								GUT_GENOME101636_00512	GUT_GENOME080351_02659								GUT_GENOME096203_02757	GUT_GENOME001854_01113				GUT_GENOME187777_00661	GUT_GENOME057672_01210	GUT_GENOME113868_01983		GUT_GENOME143498_00506	GUT_GENOME013055_00306														GUT_GENOME158290_00383	GUT_GENOME096507_00534
				GUT_GENOME000149_00499	GUT_GENOME096443_00590								GUT_GENOME251721_03797	GUT_GENOME142589_01169								GUT_GENOME102353_03726	GUT_GENOME096522_00612				GUT_GENOME042029_00287	GUT_GENOME084084_00777	GUT_GENOME237051_00394		GUT_GENOME098969_01191	GUT_GENOME243939_00379														GUT_GENOME143400_03089	GUT_GENOME009824_00270
				GUT_GENOME193403_00562	GUT_GENOME142589_01356								GUT_GENOME020805_00865	GUT_GENOME000565_01587								GUT_GENOME122359_02213	GUT_GENOME000133_05986				GUT_GENOME009549_00924	GUT_GENOME122330_00357	GUT_GENOME244005_00544		GUT_GENOME014888_00221	GUT_GENOME001752_01822														GUT_GENOME096546_01491	GUT_GENOME171356_04385
				GUT_GENOME239725_01458	GUT_GENOME147149_01328								GUT_GENOME140078_01591	GUT_GENOME096239_00236								GUT_GENOME205964_01562	GUT_GENOME096538_01636				GUT_GENOME095967_01852	GUT_GENOME039567_01794	GUT_GENOME073885_02340		GUT_GENOME236231_01049	GUT_GENOME139627_00676														GUT_GENOME284580_01671	GUT_GENOME244516_00452
				GUT_GENOME096080_03794	GUT_GENOME141809_02987								GUT_GENOME001745_03005	GUT_GENOME142592_00828								GUT_GENOME001255_01988	GUT_GENOME067489_00316				GUT_GENOME145378_04253	GUT_GENOME143723_03981	GUT_GENOME140245_02288		GUT_GENOME096534_00261	GUT_GENOME013560_00784														GUT_GENOME140246_02845	GUT_GENOME143740_03114
				GUT_GENOME095707_00266	GUT_GENOME285134_02169								GUT_GENOME140808_00618	GUT_GENOME143740_00902								GUT_GENOME142485_01751	GUT_GENOME143127_03462				GUT_GENOME144544_00584	GUT_GENOME001376_01832	GUT_GENOME258514_02504		GUT_GENOME284971_01265	GUT_GENOME000319_02916														GUT_GENOME111398_00808	GUT_GENOME277835_00209
				GUT_GENOME088644_01340	GUT_GENOME185273_01478								GUT_GENOME208016_00964	GUT_GENOME179676_00387								GUT_GENOME001115_02615	GUT_GENOME239815_01328				GUT_GENOME096294_01589	GUT_GENOME195910_01270	GUT_GENOME002382_01454		GUT_GENOME125804_01331	GUT_GENOME104352_00305														GUT_GENOME146010_04479	GUT_GENOME143498_03658
				GUT_GENOME208504_01057	GUT_GENOME047484_00261								GUT_GENOME155926_01666	GUT_GENOME096257_00672								GUT_GENOME274749_01413	GUT_GENOME118160_00164				GUT_GENOME073885_00767	GUT_GENOME254659_01521	GUT_GENOME260112_00031		GUT_GENOME231453_00794	GUT_GENOME000706_00525														GUT_GENOME064659_01005	GUT_GENOME247584_00920
				GUT_GENOME259872_01707	GUT_GENOME105698_01264								GUT_GENOME095599_00558	GUT_GENOME143726_00832								GUT_GENOME153760_00386	GUT_GENOME114602_00794				GUT_GENOME260024_00853	GUT_GENOME257278_02252	GUT_GENOME187127_00336		GUT_GENOME237441_02103	GUT_GENOME034446_00103														GUT_GENOME022295_00967	GUT_GENOME115340_00883
				GUT_GENOME037806_01018	GUT_GENOME231453_04125								GUT_GENOME285291_01454	GUT_GENOME019023_00082								GUT_GENOME056730_01462	GUT_GENOME251011_01393				GUT_GENOME016875_02137	GUT_GENOME153166_00726	GUT_GENOME000029_02129		GUT_GENOME087442_01901	GUT_GENOME139895_00528														GUT_GENOME092757_01310	GUT_GENOME283183_00341
				GUT_GENOME171597_00460	GUT_GENOME097946_02060								GUT_GENOME001274_01965	GUT_GENOME157873_01421								GUT_GENOME044788_00463	GUT_GENOME096551_00969				GUT_GENOME096556_01263	GUT_GENOME235214_00985	GUT_GENOME138026_00846		GUT_GENOME256714_01964	GUT_GENOME001297_02792														GUT_GENOME096134_01138	GUT_GENOME157303_01398
				GUT_GENOME217658_00918	GUT_GENOME107760_00648								GUT_GENOME239662_00476	GUT_GENOME148641_01064								GUT_GENOME222694_01514	GUT_GENOME140082_02390				GUT_GENOME259528_01211	GUT_GENOME101940_00577	GUT_GENOME094066_01132		GUT_GENOME007598_01737	GUT_GENOME165741_02349														GUT_GENOME279576_00976	GUT_GENOME022180_00347
				GUT_GENOME217432_00886	GUT_GENOME000049_00105								GUT_GENOME000662_01475	GUT_GENOME200288_03689								GUT_GENOME018557_01417	GUT_GENOME286769_00282				GUT_GENOME110959_00993	GUT_GENOME206604_00961	GUT_GENOME282538_01654		GUT_GENOME103557_01290	GUT_GENOME238206_00815														GUT_GENOME141397_00435	GUT_GENOME008083_01137
				GUT_GENOME239747_00922	GUT_GENOME158644_00639								GUT_GENOME101082_03197	GUT_GENOME096301_00832								GUT_GENOME000479_00060	GUT_GENOME216302_03331				GUT_GENOME115210_00163	GUT_GENOME000432_00513	GUT_GENOME096221_02358		GUT_GENOME143747_04623	GUT_GENOME161262_00941														GUT_GENOME110766_00862	GUT_GENOME015599_01855
				GUT_GENOME207884_00863	GUT_GENOME212248_00754								GUT_GENOME095850_01628	GUT_GENOME231730_01109								GUT_GENOME142411_00920	GUT_GENOME058044_00548				GUT_GENOME000554_01795	GUT_GENOME079106_00139	GUT_GENOME130636_00424		GUT_GENOME096485_02175	GUT_GENOME096458_03499														GUT_GENOME272660_01064	GUT_GENOME031326_00602
				GUT_GENOME143760_04520	GUT_GENOME140278_00613								GUT_GENOME000676_01395	GUT_GENOME003665_00257								GUT_GENOME216297_00205	GUT_GENOME000137_00844				GUT_GENOME239725_01951	GUT_GENOME247211_00519	GUT_GENOME109102_00614		GUT_GENOME100192_01731	GUT_GENOME217432_01157														GUT_GENOME000049_02111	GUT_GENOME092387_01871
				GUT_GENOME144544_00722	GUT_GENOME000010_01120								GUT_GENOME096179_02075	GUT_GENOME207259_02965								GUT_GENOME143361_03423	GUT_GENOME222694_02639				GUT_GENOME126659_00411	GUT_GENOME144544_03980	GUT_GENOME217674_01884		GUT_GENOME283626_00456	GUT_GENOME047484_00599														GUT_GENOME000598_01321	GUT_GENOME277093_00969
				GUT_GENOME171567_03979	GUT_GENOME000566_00501								GUT_GENOME198844_01585	GUT_GENOME268665_00203								GUT_GENOME233265_01582	GUT_GENOME111584_01155				GUT_GENOME145983_01602	GUT_GENOME017898_00252	GUT_GENOME285195_00761		GUT_GENOME199120_02253	GUT_GENOME017828_00031														GUT_GENOME277187_00188	GUT_GENOME097258_01421
				GUT_GENOME142057_01334	GUT_GENOME096527_02563								GUT_GENOME096063_00772	GUT_GENOME000624_00186								GUT_GENOME001120_00367	GUT_GENOME237426_01457				GUT_GENOME247421_02531	GUT_GENOME141068_01052	GUT_GENOME096424_00450		GUT_GENOME212260_04172	GUT_GENOME000067_01069														GUT_GENOME142588_02807	GUT_GENOME131908_02223
				GUT_GENOME157873_01753	GUT_GENOME105885_00430								GUT_GENOME258721_01321	GUT_GENOME170556_00288								GUT_GENOME088644_02636	GUT_GENOME271917_01657				GUT_GENOME177471_04806	GUT_GENOME045330_00124	GUT_GENOME096383_00848		GUT_GENOME038289_00958	GUT_GENOME256840_01997														GUT_GENOME102720_00118	GUT_GENOME111334_00766
				GUT_GENOME242840_02799	GUT_GENOME000595_01071								GUT_GENOME095979_01736	GUT_GENOME284658_00682								GUT_GENOME143131_01540	GUT_GENOME096183_00191				GUT_GENOME155439_01738	GUT_GENOME141809_01825	GUT_GENOME257473_00058		GUT_GENOME100879_00877	GUT_GENOME000706_02662														GUT_GENOME070996_00825	GUT_GENOME000250_02791
				GUT_GENOME147598_02827	GUT_GENOME157422_00601								GUT_GENOME000513_03747	GUT_GENOME103750_00508								GUT_GENOME133541_03125	GUT_GENOME251566_01804				GUT_GENOME112856_01889	GUT_GENOME210502_00896	GUT_GENOME000338_03644		GUT_GENOME251332_01163	GUT_GENOME100497_00201														GUT_GENOME256714_01192	GUT_GENOME135531_01216
				GUT_GENOME008455_00818	GUT_GENOME232032_03904								GUT_GENOME143505_02069	GUT_GENOME140826_01436								GUT_GENOME157213_01914	GUT_GENOME009210_00864				GUT_GENOME253287_04149	GUT_GENOME001800_01577	GUT_GENOME095967_01852		GUT_GENOME060514_00034	GUT_GENOME000128_00784														GUT_GENOME034386_00659	GUT_GENOME244165_00450
				GUT_GENOME147152_03949	GUT_GENOME147152_03898								GUT_GENOME000565_00910	GUT_GENOME141734_02277								GUT_GENOME000122_02126	GUT_GENOME001575_01823				GUT_GENOME000285_01925	GUT_GENOME000308_00671	GUT_GENOME132077_00406		GUT_GENOME096534_03207	GUT_GENOME155439_01319														GUT_GENOME008455_01292	GUT_GENOME140264_00082
				GUT_GENOME001016_01512	GUT_GENOME154740_00659								GUT_GENOME283050_03390	GUT_GENOME078716_00274								GUT_GENOME067546_00202	GUT_GENOME000659_00966				GUT_GENOME018576_01793	GUT_GENOME022484_03512	GUT_GENOME101256_00958		GUT_GENOME000889_00373	GUT_GENOME139200_00015														GUT_GENOME235747_01863	GUT_GENOME238979_02135
				GUT_GENOME109620_02354	GUT_GENOME008152_00278								GUT_GENOME096240_00880	GUT_GENOME231413_01863								GUT_GENOME143484_03402	GUT_GENOME001770_00971				GUT_GENOME127781_01530	GUT_GENOME026064_00309	GUT_GENOME262636_00322		GUT_GENOME273433_00203	GUT_GENOME155972_00607														GUT_GENOME007005_02405	GUT_GENOME104570_00117
				GUT_GENOME096179_02626	GUT_GENOME144544_01573								GUT_GENOME239737_02132	GUT_GENOME107760_00153								GUT_GENOME002158_04393	GUT_GENOME020805_00149				GUT_GENOME251083_00641	GUT_GENOME143411_00503	GUT_GENOME034763_00123		GUT_GENOME247084_03255	GUT_GENOME269304_00412														GUT_GENOME141809_00114	GUT_GENOME050070_00940
				GUT_GENOME229012_01803	GUT_GENOME186342_01618								GUT_GENOME096366_01664	GUT_GENOME117139_01698								GUT_GENOME000166_01434	GUT_GENOME233279_01817				GUT_GENOME126719_01296	GUT_GENOME056730_02542	GUT_GENOME096465_02661		GUT_GENOME007573_00375	GUT_GENOME268622_00103														GUT_GENOME044257_00536	GUT_GENOME193126_01019
				GUT_GENOME231300_00132	GUT_GENOME171682_04522								GUT_GENOME231685_02141	GUT_GENOME246802_02087								GUT_GENOME074418_00468	GUT_GENOME139147_01350				GUT_GENOME276949_00812	GUT_GENOME136010_00857	GUT_GENOME001223_00693		GUT_GENOME176098_00613	GUT_GENOME250439_00414														GUT_GENOME096508_00219	GUT_GENOME133816_01088
				GUT_GENOME095980_01165	GUT_GENOME255792_02786								GUT_GENOME218891_01777	GUT_GENOME141187_01166								GUT_GENOME264037_00513	GUT_GENOME127500_00883				GUT_GENOME001115_00499	GUT_GENOME199169_02137	GUT_GENOME183568_00845		GUT_GENOME000931_03621	GUT_GENOME215504_00261														GUT_GENOME207475_00885	GUT_GENOME251968_00109
				GUT_GENOME096485_01551	GUT_GENOME142616_00023								GUT_GENOME000565_01587	GUT_GENOME096543_02349								GUT_GENOME159262_00002	GUT_GENOME235152_01016				GUT_GENOME244516_00101	GUT_GENOME030016_00722	GUT_GENOME000559_00235		GUT_GENOME018115_00450	GUT_GENOME145980_03072														GUT_GENOME021831_00254	GUT_GENOME071017_00825
				GUT_GENOME143127_00716	GUT_GENOME048181_01796								GUT_GENOME140299_00629	GUT_GENOME274362_00941								GUT_GENOME258883_01448	GUT_GENOME231299_00655				GUT_GENOME141047_02434	GUT_GENOME219438_04445	GUT_GENOME142457_03645		GUT_GENOME000152_00918	GUT_GENOME001877_01959														GUT_GENOME158484_01782	GUT_GENOME009873_00704
				GUT_GENOME001575_01459	GUT_GENOME207869_03271								GUT_GENOME001853_01517	GUT_GENOME141727_05458								GUT_GENOME172926_01471	GUT_GENOME096505_04106				GUT_GENOME096185_01212	GUT_GENOME001749_00015	GUT_GENOME182432_00570		GUT_GENOME129046_01399	GUT_GENOME143137_00951														GUT_GENOME000111_00971	GUT_GENOME096439_03010
				GUT_GENOME155726_00138	GUT_GENOME096228_01068								GUT_GENOME143726_00832	GUT_GENOME024543_02332								GUT_GENOME001324_01260	GUT_GENOME149381_02638				GUT_GENOME000122_01639	GUT_GENOME139424_00244	GUT_GENOME001223_00289		GUT_GENOME009256_00435	GUT_GENOME103718_01045														GUT_GENOME099523_02570	GUT_GENOME000614_00122
				GUT_GENOME143484_02806	GUT_GENOME000906_03118								GUT_GENOME143740_00902	GUT_GENOME000595_02871								GUT_GENOME097684_00664	GUT_GENOME019121_01835				GUT_GENOME144544_00402	GUT_GENOME001417_01609	GUT_GENOME089515_01101		GUT_GENOME236438_00429	GUT_GENOME231661_00802														GUT_GENOME008785_00223	GUT_GENOME139860_00342
				GUT_GENOME171648_03810	GUT_GENOME143752_00847								GUT_GENOME149380_03787	GUT_GENOME149706_00686								GUT_GENOME163027_02983	GUT_GENOME008172_01851				GUT_GENOME000655_02385	GUT_GENOME115838_00612	GUT_GENOME141303_00358		GUT_GENOME147146_03437	GUT_GENOME096466_00751														GUT_GENOME000729_00742	GUT_GENOME234840_00218
				GUT_GENOME143760_03751	GUT_GENOME188425_00194								GUT_GENOME096257_00672	GUT_GENOME142596_01603								GUT_GENOME246421_01940	GUT_GENOME255999_02408				GUT_GENOME001877_01447	GUT_GENOME001598_03469	GUT_GENOME097942_01677		GUT_GENOME158306_02672	GUT_GENOME244339_00957														GUT_GENOME243009_00453	GUT_GENOME186087_00405
				GUT_GENOME006618_00117	GUT_GENOME103705_00764								GUT_GENOME148641_01064	GUT_GENOME125418_00368								GUT_GENOME002158_03546	GUT_GENOME035741_00229				GUT_GENOME094927_01781	GUT_GENOME175935_01752	GUT_GENOME067057_00604		GUT_GENOME103766_00467	GUT_GENOME103523_00372														GUT_GENOME246802_01139	GUT_GENOME139132_00156
				GUT_GENOME142578_01978	GUT_GENOME279417_00465								GUT_GENOME001295_00772	GUT_GENOME117619_02466								GUT_GENOME257278_01567	GUT_GENOME199331_00121				GUT_GENOME140330_03167	GUT_GENOME140240_03604	GUT_GENOME243002_00737		GUT_GENOME106502_00620	GUT_GENOME001115_03125														GUT_GENOME231599_01989	GUT_GENOME013685_00357
				GUT_GENOME001417_03168	GUT_GENOME095248_02196								GUT_GENOME003665_00257	GUT_GENOME258286_00230								GUT_GENOME275692_00051	GUT_GENOME140240_02443				GUT_GENOME018156_01312	GUT_GENOME091104_01133	GUT_GENOME235365_00404		GUT_GENOME279992_00524															GUT_GENOME147524_04111	GUT_GENOME141763_03463
				GUT_GENOME232192_03448	GUT_GENOME025996_00252								GUT_GENOME097684_03186	GUT_GENOME254562_01523								GUT_GENOME096191_02517	GUT_GENOME000852_02554				GUT_GENOME000231_00873	GUT_GENOME146008_01511	GUT_GENOME177471_04806		GUT_GENOME180274_00571															GUT_GENOME001417_01318	GUT_GENOME000559_03771
				GUT_GENOME255824_01375	GUT_GENOME000259_02440								GUT_GENOME145983_01245	GUT_GENOME005683_02588								GUT_GENOME237867_01387	GUT_GENOME011747_00539				GUT_GENOME261061_00072	GUT_GENOME257001_00897	GUT_GENOME007470_01881		GUT_GENOME262105_02595															GUT_GENOME231320_03303	GUT_GENOME193642_00565
				GUT_GENOME001270_03264	GUT_GENOME000137_02340								GUT_GENOME096473_04680	GUT_GENOME140053_03178								GUT_GENOME247455_01300	GUT_GENOME269798_01238				GUT_GENOME096170_01038	GUT_GENOME197266_00217	GUT_GENOME163309_00140		GUT_GENOME104910_00842															GUT_GENOME200047_00189	GUT_GENOME111314_01833
				GUT_GENOME001147_03637	GUT_GENOME225173_00972								GUT_GENOME000308_01513	GUT_GENOME098572_04281								GUT_GENOME037509_00264	GUT_GENOME110705_00016				GUT_GENOME001488_00655	GUT_GENOME253808_01581	GUT_GENOME140601_02192		GUT_GENOME268227_01125															GUT_GENOME000308_01192	GUT_GENOME099111_01893
				GUT_GENOME120040_02216	GUT_GENOME000057_03464								GUT_GENOME231300_01050	GUT_GENOME063926_02340								GUT_GENOME140065_01353	GUT_GENOME040420_02178				GUT_GENOME115359_01925	GUT_GENOME121405_00656	GUT_GENOME239028_00430		GUT_GENOME005886_02442															GUT_GENOME192857_00367	GUT_GENOME000563_03243
				GUT_GENOME143092_03103	GUT_GENOME111314_01035								GUT_GENOME268665_00203	GUT_GENOME115357_00517								GUT_GENOME103749_00899	GUT_GENOME239516_00625				GUT_GENOME236438_00138	GUT_GENOME031916_01188	GUT_GENOME106243_00994		GUT_GENOME000818_00249															GUT_GENOME103694_02418	GUT_GENOME274919_00114
				GUT_GENOME002382_05178	GUT_GENOME220495_01208								GUT_GENOME251627_01272	GUT_GENOME117154_01348								GUT_GENOME159262_03214	GUT_GENOME142596_00399				GUT_GENOME096203_02660	GUT_GENOME143346_01920	GUT_GENOME122014_01121		GUT_GENOME092065_02999															GUT_GENOME096036_01981	GUT_GENOME271436_01747
				GUT_GENOME231559_02744	GUT_GENOME140342_01194								GUT_GENOME285322_00563	GUT_GENOME176893_01061								GUT_GENOME133372_00533	GUT_GENOME143483_01677				GUT_GENOME147854_02157	GUT_GENOME147796_01241	GUT_GENOME096077_02175		GUT_GENOME212287_01099															GUT_GENOME170498_02002	GUT_GENOME019015_00807
				GUT_GENOME147598_04905	GUT_GENOME103712_00979								GUT_GENOME143484_00927	GUT_GENOME029301_01211								GUT_GENOME258397_01312	GUT_GENOME100339_00567				GUT_GENOME258758_01000	GUT_GENOME239745_00055	GUT_GENOME243826_01165		GUT_GENOME128517_01320															GUT_GENOME231257_00539	GUT_GENOME141425_01380
				GUT_GENOME265882_00518	GUT_GENOME243082_06607								GUT_GENOME096063_00038	GUT_GENOME013685_00924								GUT_GENOME000594_04427	GUT_GENOME259081_01294				GUT_GENOME097844_02521	GUT_GENOME001745_00156	GUT_GENOME244786_01318		GUT_GENOME140082_03044															GUT_GENOME237516_02237	GUT_GENOME001023_02005
				GUT_GENOME014888_00964	GUT_GENOME075582_01620								GUT_GENOME284658_00682	GUT_GENOME147629_01057								GUT_GENOME056730_00545	GUT_GENOME254659_01222				GUT_GENOME143232_05130	GUT_GENOME161643_00739	GUT_GENOME104589_00235		GUT_GENOME231599_03481															GUT_GENOME235903_00257	GUT_GENOME069863_00417
				GUT_GENOME000250_01627	GUT_GENOME095247_00274								GUT_GENOME078449_00183	GUT_GENOME229012_00916								GUT_GENOME142545_01463	GUT_GENOME096513_02607				GUT_GENOME095941_00914	GUT_GENOME143727_00342	GUT_GENOME231920_01204		GUT_GENOME141436_00240															GUT_GENOME096189_05506	GUT_GENOME013280_00257
				GUT_GENOME143726_01358	GUT_GENOME000852_03471								GUT_GENOME000017_00098	GUT_GENOME285134_01408								GUT_GENOME096080_04546	GUT_GENOME234729_00460				GUT_GENOME096174_03086	GUT_GENOME233268_00677	GUT_GENOME158781_02524		GUT_GENOME096179_01917															GUT_GENOME000483_03702	GUT_GENOME251277_01022
				GUT_GENOME001004_02422	GUT_GENOME026764_00091								GUT_GENOME140826_01436	GUT_GENOME143723_00584								GUT_GENOME037775_02030	GUT_GENOME093120_00439				GUT_GENOME111543_01073	GUT_GENOME212983_00655	GUT_GENOME144544_00402		GUT_GENOME140065_01131															GUT_GENOME276430_00553	GUT_GENOME140602_01235
				GUT_GENOME021430_00621	GUT_GENOME000725_01563								GUT_GENOME001401_01042	GUT_GENOME146008_03697								GUT_GENOME000237_02568	GUT_GENOME105885_00550				GUT_GENOME102353_02665	GUT_GENOME217432_00294	GUT_GENOME011208_00529		GUT_GENOME237442_00694															GUT_GENOME131672_01629	GUT_GENOME000046_01739
				GUT_GENOME000634_00279	GUT_GENOME000139_02714								GUT_GENOME251721_01674	GUT_GENOME213124_00578								GUT_GENOME140240_04753	GUT_GENOME092292_00784				GUT_GENOME010023_00739	GUT_GENOME275692_00176	GUT_GENOME097394_01651		GUT_GENOME095978_00737															GUT_GENOME000031_01976	GUT_GENOME096465_01464
				GUT_GENOME096206_00600	GUT_GENOME258847_00835								GUT_GENOME096573_01611	GUT_GENOME000509_01352								GUT_GENOME110705_00847	GUT_GENOME217674_00574				GUT_GENOME252841_01200	GUT_GENOME253083_01444	GUT_GENOME098912_00587		GUT_GENOME231661_02359															GUT_GENOME239690_01859	GUT_GENOME143502_01443
				GUT_GENOME095650_01136	GUT_GENOME000219_02764								GUT_GENOME096511_03280	GUT_GENOME207411_01233								GUT_GENOME171597_00445	GUT_GENOME001488_00043				GUT_GENOME238401_01971	GUT_GENOME065321_00564	GUT_GENOME232472_01055		GUT_GENOME082800_00713															GUT_GENOME000711_01069	GUT_GENOME095996_02495
				GUT_GENOME034183_00973	GUT_GENOME096530_00591								GUT_GENOME084477_00849	GUT_GENOME096562_02316								GUT_GENOME094938_01089	GUT_GENOME095991_01729				GUT_GENOME000122_00588	GUT_GENOME035196_01391	GUT_GENOME001805_00385		GUT_GENOME140826_00070															GUT_GENOME066135_01466	GUT_GENOME005683_01284
				GUT_GENOME129695_00933	GUT_GENOME142585_00566								GUT_GENOME107760_00153	GUT_GENOME000770_01508								GUT_GENOME108993_03791	GUT_GENOME011797_00163				GUT_GENOME126719_01979	GUT_GENOME119698_00697	GUT_GENOME251543_01644		GUT_GENOME094321_01724															GUT_GENOME243998_00309	GUT_GENOME251867_01574
				GUT_GENOME096179_01797	GUT_GENOME198459_00040								GUT_GENOME096213_01954	GUT_GENOME069692_01331								GUT_GENOME283137_00307	GUT_GENOME148641_00451				GUT_GENOME096080_00799	GUT_GENOME218838_01256	GUT_GENOME238301_01912		GUT_GENOME076493_00581															GUT_GENOME025577_01934	GUT_GENOME018684_00186
				GUT_GENOME140265_02002	GUT_GENOME140361_03073								GUT_GENOME068585_01707	GUT_GENOME096511_01315								GUT_GENOME176020_01109	GUT_GENOME091092_02469				GUT_GENOME199120_02021	GUT_GENOME095971_00767	GUT_GENOME243084_02986		GUT_GENOME000706_02375															GUT_GENOME087442_01894	GUT_GENOME014372_00126
				GUT_GENOME239789_00577	GUT_GENOME102829_01313								GUT_GENOME096543_02349	GUT_GENOME096294_04349								GUT_GENOME138139_00474	GUT_GENOME024712_00957				GUT_GENOME114245_01508	GUT_GENOME096240_00447	GUT_GENOME096283_03592		GUT_GENOME060514_01671															GUT_GENOME148641_00251	GUT_GENOME207411_01082
				GUT_GENOME103762_02939	GUT_GENOME057155_01100								GUT_GENOME256155_02944	GUT_GENOME140337_02083								GUT_GENOME227599_00862	GUT_GENOME245660_00930				GUT_GENOME041343_01043	GUT_GENOME102353_03801	GUT_GENOME095592_01761		GUT_GENOME264766_00378															GUT_GENOME023484_00457	GUT_GENOME187394_00185
				GUT_GENOME145695_03271	GUT_GENOME143282_03934								GUT_GENOME231247_01084	GUT_GENOME001738_01377								GUT_GENOME001488_00774	GUT_GENOME199120_00336				GUT_GENOME116258_01708	GUT_GENOME001417_01730	GUT_GENOME141765_00381		GUT_GENOME146011_01538															GUT_GENOME148443_00561	GUT_GENOME232082_01035
				GUT_GENOME140104_02287	GUT_GENOME215006_01404								GUT_GENOME171643_00280	GUT_GENOME098242_01194								GUT_GENOME231300_00730	GUT_GENOME159064_00263				GUT_GENOME000035_03074	GUT_GENOME046227_01115	GUT_GENOME254353_00728		GUT_GENOME001587_02953															GUT_GENOME030812_00616	GUT_GENOME143282_00627
				GUT_GENOME260664_00377	GUT_GENOME009698_01612								GUT_GENOME143156_01003	GUT_GENOME000729_04732								GUT_GENOME268486_01012	GUT_GENOME103705_02960				GUT_GENOME096080_03612	GUT_GENOME000111_00008	GUT_GENOME246461_01594		GUT_GENOME140808_03268															GUT_GENOME103856_00166	GUT_GENOME000327_02005
				GUT_GENOME096573_02448	GUT_GENOME143137_04215								GUT_GENOME262105_00469	GUT_GENOME237438_00976								GUT_GENOME276091_00112	GUT_GENOME143484_01088				GUT_GENOME096489_00256	GUT_GENOME000396_01018	GUT_GENOME084946_00219		GUT_GENOME144544_03516															GUT_GENOME145695_02176	GUT_GENOME142392_02918
				GUT_GENOME258557_01977	GUT_GENOME000996_01795								GUT_GENOME024543_02332	GUT_GENOME142588_00912								GUT_GENOME096473_03299	GUT_GENOME077706_01494				GUT_GENOME000420_00218	GUT_GENOME009542_01441	GUT_GENOME155459_02496		GUT_GENOME207341_00817															GUT_GENOME090444_00310	GUT_GENOME056772_00971
				GUT_GENOME143727_03700	GUT_GENOME110766_01931								GUT_GENOME103893_00769	GUT_GENOME000634_01856								GUT_GENOME237875_01222	GUT_GENOME256243_00645				GUT_GENOME000035_04699	GUT_GENOME268069_01128	GUT_GENOME142588_01733		GUT_GENOME078034_00449															GUT_GENOME143421_02514	GUT_GENOME284658_00099
				GUT_GENOME094938_00191	GUT_GENOME222009_00267								GUT_GENOME000595_02871	GUT_GENOME240528_00073								GUT_GENOME143127_03153	GUT_GENOME001159_00108				GUT_GENOME022484_04207	GUT_GENOME163220_00039	GUT_GENOME207259_02592		GUT_GENOME140340_01290															GUT_GENOME142057_02249	GUT_GENOME001177_00711
				GUT_GENOME131087_00788	GUT_GENOME007693_02188								GUT_GENOME254063_00748	GUT_GENOME096200_03963								GUT_GENOME000149_02153	GUT_GENOME096532_00592				GUT_GENOME001488_00569	GUT_GENOME034763_00231	GUT_GENOME018425_01803		GUT_GENOME103694_02820															GUT_GENOME101256_01188	GUT_GENOME019241_01308
				GUT_GENOME147109_02696	GUT_GENOME108995_01672								GUT_GENOME020741_00126	GUT_GENOME000677_00547								GUT_GENOME205174_01300	GUT_GENOME245362_02692				GUT_GENOME026187_01722	GUT_GENOME136010_01227	GUT_GENOME126659_02463		GUT_GENOME143190_01480															GUT_GENOME000092_00476	GUT_GENOME125875_01415
				GUT_GENOME075185_00715	GUT_GENOME096550_04543								GUT_GENOME113868_02154	GUT_GENOME152800_00647								GUT_GENOME134988_01806	GUT_GENOME071857_02683				GUT_GENOME140240_04390	GUT_GENOME245773_00324	GUT_GENOME006314_02315		GUT_GENOME139200_01220															GUT_GENOME257132_00123	GUT_GENOME116636_00371
				GUT_GENOME103751_00258	GUT_GENOME096221_04430								GUT_GENOME151520_01955	GUT_GENOME000224_01490								GUT_GENOME274372_01269	GUT_GENOME231685_01205				GUT_GENOME145378_00819	GUT_GENOME147523_03341	GUT_GENOME245660_00284		GUT_GENOME096670_03446															GUT_GENOME142576_00399	GUT_GENOME091217_00708
				GUT_GENOME102211_01020	GUT_GENOME225144_01734								GUT_GENOME117619_02466	GUT_GENOME172932_02836								GUT_GENOME001778_02367	GUT_GENOME207884_01130				GUT_GENOME126719_01191	GUT_GENOME104568_00723	GUT_GENOME158638_02488		GUT_GENOME096025_02266															GUT_GENOME257069_00790	GUT_GENOME096375_00017
				GUT_GENOME142587_01191	GUT_GENOME146010_04511								GUT_GENOME074354_00627	GUT_GENOME001376_00319								GUT_GENOME157873_00059	GUT_GENOME237058_00942				GUT_GENOME117767_00927	GUT_GENOME094102_00800	GUT_GENOME234253_00272		GUT_GENOME036763_00091															GUT_GENOME000338_04067	GUT_GENOME244248_00428
				GUT_GENOME272559_00298	GUT_GENOME166385_00668								GUT_GENOME000001_02764	GUT_GENOME207897_01505								GUT_GENOME147854_03325	GUT_GENOME017739_00828				GUT_GENOME000308_01190	GUT_GENOME154740_01370	GUT_GENOME177382_00022		GUT_GENOME158752_01910															GUT_GENOME250439_00756	GUT_GENOME286320_00413
				GUT_GENOME147138_04322	GUT_GENOME265968_00801								GUT_GENOME001778_02012	GUT_GENOME065370_01087								GUT_GENOME105301_02556	GUT_GENOME096560_01334				GUT_GENOME148443_00559	GUT_GENOME095986_01545	GUT_GENOME231920_04030		GUT_GENOME085442_00776															GUT_GENOME142612_02232	GUT_GENOME274634_00997
				GUT_GENOME139627_02421	GUT_GENOME122482_01489								GUT_GENOME000131_01192	GUT_GENOME103713_00913								GUT_GENOME219276_01884	GUT_GENOME095997_00954				GUT_GENOME231300_01688	GUT_GENOME250693_00234	GUT_GENOME102353_02665		GUT_GENOME157463_02274															GUT_GENOME243377_00171	GUT_GENOME065434_01874
				GUT_GENOME138470_00445	GUT_GENOME142545_00950								GUT_GENOME239662_00174	GUT_GENOME177471_01750								GUT_GENOME256353_00217	GUT_GENOME103765_00010				GUT_GENOME152999_01490	GUT_GENOME209822_00707	GUT_GENOME111543_01073		GUT_GENOME052375_00156															GUT_GENOME208016_00592	GUT_GENOME130350_00132
				GUT_GENOME096526_00064	GUT_GENOME158821_01492								GUT_GENOME060514_01688	GUT_GENOME239690_05128								GUT_GENOME194547_01063	GUT_GENOME283286_01115				GUT_GENOME097844_02376	GUT_GENOME090402_00826	GUT_GENOME000057_02178		GUT_GENOME266139_00051															GUT_GENOME000260_00580	GUT_GENOME235884_01738
				GUT_GENOME140104_02857	GUT_GENOME147550_00426								GUT_GENOME014138_02449	GUT_GENOME142492_00112								GUT_GENOME007443_00921	GUT_GENOME081289_01417				GUT_GENOME096511_00491	GUT_GENOME000479_01891	GUT_GENOME096546_03106		GUT_GENOME259679_00599															GUT_GENOME149706_00866	GUT_GENOME143726_01580
				GUT_GENOME245287_02486	GUT_GENOME152118_00167								GUT_GENOME000682_01434	GUT_GENOME231559_02201								GUT_GENOME001417_01920	GUT_GENOME001519_00573				GUT_GENOME026187_01596	GUT_GENOME252799_00701	GUT_GENOME096049_02176		GUT_GENOME078005_01738															GUT_GENOME140826_00588	GUT_GENOME000700_01343
				GUT_GENOME022512_00327	GUT_GENOME142490_01603								GUT_GENOME104676_00365	GUT_GENOME283183_01342								GUT_GENOME046057_00705	GUT_GENOME000944_04711				GUT_GENOME095971_00496	GUT_GENOME283286_00430	GUT_GENOME283626_02084		GUT_GENOME215793_01191															GUT_GENOME154595_00164	GUT_GENOME108995_02387
				GUT_GENOME001004_02735	GUT_GENOME000327_01883								GUT_GENOME225259_00608	GUT_GENOME141371_02676								GUT_GENOME093746_00724	GUT_GENOME155708_00210				GUT_GENOME101636_00789	GUT_GENOME098710_01675	GUT_GENOME231730_02972		GUT_GENOME140043_02711															GUT_GENOME117625_01590	GUT_GENOME014643_01008
				GUT_GENOME278952_01039	GUT_GENOME000931_03539								GUT_GENOME029301_01211	GUT_GENOME096533_03013								GUT_GENOME140272_00904	GUT_GENOME277334_00168				GUT_GENOME143232_00864	GUT_GENOME142596_00803	GUT_GENOME213427_00560		GUT_GENOME266127_01226															GUT_GENOME143527_03329	GUT_GENOME268665_01734
				GUT_GENOME232302_00044	GUT_GENOME145698_03274								GUT_GENOME141809_01950	GUT_GENOME017205_00465								GUT_GENOME207866_01440	GUT_GENOME140304_00755				GUT_GENOME145378_01737	GUT_GENOME142588_01371	GUT_GENOME211596_01308		GUT_GENOME277092_00477															GUT_GENOME000735_00574	GUT_GENOME243237_00547
				GUT_GENOME248577_00234	GUT_GENOME171682_01352								GUT_GENOME146008_03697	GUT_GENOME237865_01762								GUT_GENOME231300_00729	GUT_GENOME096556_01006				GUT_GENOME096292_01117	GUT_GENOME155972_00425	GUT_GENOME225024_01244		GUT_GENOME226927_02325															GUT_GENOME147542_00478	GUT_GENOME025678_01426
				GUT_GENOME035512_01292	GUT_GENOME001575_02167								GUT_GENOME143723_00584	GUT_GENOME095981_01571								GUT_GENOME217674_00392	GUT_GENOME040022_00572				GUT_GENOME139147_01923	GUT_GENOME062469_01569	GUT_GENOME113961_01422		GUT_GENOME000565_04271															GUT_GENOME000624_00883	GUT_GENOME021377_00281
				GUT_GENOME236885_00296	GUT_GENOME113022_00369								GUT_GENOME143156_02461	GUT_GENOME207914_03436								GUT_GENOME276126_01794	GUT_GENOME140365_04735				GUT_GENOME144544_01620	GUT_GENOME143092_02526	GUT_GENOME270304_00235		GUT_GENOME000718_01903															GUT_GENOME143718_00680	GUT_GENOME021760_00255
				GUT_GENOME000655_04180	GUT_GENOME157264_00386								GUT_GENOME176758_01440	GUT_GENOME210710_01834								GUT_GENOME113153_01321	GUT_GENOME000272_00133				GUT_GENOME097987_02152	GUT_GENOME123416_00010	GUT_GENOME152999_01490		GUT_GENOME232192_04462															GUT_GENOME001506_00219	GUT_GENOME255912_01462
				GUT_GENOME141809_04981	GUT_GENOME096385_01822								GUT_GENOME156244_01350	GUT_GENOME096547_02837								GUT_GENOME226927_02588	GUT_GENOME096542_00971				GUT_GENOME217842_01027	GUT_GENOME196940_00819	GUT_GENOME115421_01169		GUT_GENOME283286_00843															GUT_GENOME255630_01369	GUT_GENOME133171_00456
				GUT_GENOME096203_02486	GUT_GENOME283050_03107								GUT_GENOME199169_00007	GUT_GENOME194902_01841								GUT_GENOME008718_00380	GUT_GENOME138783_01494				GUT_GENOME044788_00445	GUT_GENOME143747_03949	GUT_GENOME127803_01105		GUT_GENOME096670_01540															GUT_GENOME261446_01669	GUT_GENOME017883_00809
				GUT_GENOME001635_03510	GUT_GENOME096430_02613								GUT_GENOME194726_01551	GUT_GENOME171359_02486								GUT_GENOME113426_01977	GUT_GENOME236874_01207				GUT_GENOME001120_00941	GUT_GENOME161956_00466	GUT_GENOME128042_00130		GUT_GENOME192289_01504															GUT_GENOME208505_00134	GUT_GENOME011129_00667
				GUT_GENOME091104_00766	GUT_GENOME096025_00214								GUT_GENOME207411_01233	GUT_GENOME146010_05233								GUT_GENOME096203_00130	GUT_GENOME038182_01232				GUT_GENOME018819_01503	GUT_GENOME032757_00370	GUT_GENOME269177_01168		GUT_GENOME208213_02138															GUT_GENOME206730_00119	GUT_GENOME044018_01570
				GUT_GENOME142587_03910	GUT_GENOME070485_03664								GUT_GENOME152999_01636	GUT_GENOME243082_00317								GUT_GENOME231626_02339	GUT_GENOME276091_01590				GUT_GENOME097684_02269	GUT_GENOME237867_01057	GUT_GENOME095978_01044		GUT_GENOME110741_00815															GUT_GENOME140329_01702	GUT_GENOME246211_00048
				GUT_GENOME097737_01237	GUT_GENOME096561_01470								GUT_GENOME000682_01280	GUT_GENOME145983_02457								GUT_GENOME253287_00860	GUT_GENOME231299_02623				GUT_GENOME121515_00779	GUT_GENOME145698_02123	GUT_GENOME254699_00715		GUT_GENOME024905_00179															GUT_GENOME061059_00228	GUT_GENOME232438_00076
				GUT_GENOME000423_02776	GUT_GENOME103749_03930								GUT_GENOME096294_04349	GUT_GENOME142492_01819								GUT_GENOME071857_01353	GUT_GENOME096559_02708				GUT_GENOME118228_00407	GUT_GENOME095503_01501	GUT_GENOME021430_01001		GUT_GENOME000152_02396															GUT_GENOME231626_03155	GUT_GENOME158290_00383
				GUT_GENOME143157_01129	GUT_GENOME024527_01110								GUT_GENOME000285_00357	GUT_GENOME142057_03545								GUT_GENOME149381_00053	GUT_GENOME113559_00620				GUT_GENOME001255_00988	GUT_GENOME177056_00895	GUT_GENOME143282_00473		GUT_GENOME000655_04023															GUT_GENOME231391_01843	GUT_GENOME096134_01138
				GUT_GENOME229574_02001	GUT_GENOME125804_01696								GUT_GENOME266946_00630	GUT_GENOME247404_00680								GUT_GENOME001004_00270	GUT_GENOME179941_00408				GUT_GENOME000595_01216	GUT_GENOME161802_01628	GUT_GENOME096563_03755		GUT_GENOME142396_01359															GUT_GENOME172369_01210	GUT_GENOME279576_00976
				GUT_GENOME145378_01940	GUT_GENOME109512_00638								GUT_GENOME143131_03054	GUT_GENOME158638_01451								GUT_GENOME115718_00894	GUT_GENOME107760_01939				GUT_GENOME018576_01842	GUT_GENOME113022_01086	GUT_GENOME102015_00672		GUT_GENOME095986_05727															GUT_GENOME207750_02389	GUT_GENOME170681_00113
				GUT_GENOME000767_00424	GUT_GENOME210017_00491								GUT_GENOME000718_01343	GUT_GENOME001416_00067								GUT_GENOME101636_02146	GUT_GENOME111729_00039				GUT_GENOME152999_02056	GUT_GENOME001419_01890	GUT_GENOME242840_02020		GUT_GENOME275813_00692															GUT_GENOME096555_00613	GUT_GENOME000598_01321
				GUT_GENOME258967_01504	GUT_GENOME000518_02009								GUT_GENOME258721_01741	GUT_GENOME141586_02648								GUT_GENOME000554_00065	GUT_GENOME000594_00949				GUT_GENOME152519_03455	GUT_GENOME103749_03168	GUT_GENOME204901_01066		GUT_GENOME268486_00163															GUT_GENOME262768_01693	GUT_GENOME277187_00188
				GUT_GENOME269003_00219	GUT_GENOME174465_00881								GUT_GENOME005080_00255	GUT_GENOME210225_01412								GUT_GENOME097827_01210	GUT_GENOME235147_01285				GUT_GENOME040420_01508	GUT_GENOME249268_00090	GUT_GENOME096518_00921		GUT_GENOME157119_00580															GUT_GENOME235173_01569	GUT_GENOME222413_01007
				GUT_GENOME143747_02551	GUT_GENOME231814_02249								GUT_GENOME014555_01510	GUT_GENOME103868_01581								GUT_GENOME108993_00991	GUT_GENOME108993_03959				GUT_GENOME111778_02227	GUT_GENOME215200_00630	GUT_GENOME257278_03044		GUT_GENOME095980_01027															GUT_GENOME188395_00951	GUT_GENOME000111_00971
				GUT_GENOME103893_02965	GUT_GENOME019121_02372								GUT_GENOME001575_02384	GUT_GENOME142576_01187								GUT_GENOME119153_01025	GUT_GENOME143493_02096				GUT_GENOME270891_00848	GUT_GENOME026269_00771	GUT_GENOME142610_05043		GUT_GENOME125072_01399															GUT_GENOME001538_01260	GUT_GENOME015763_01276
				GUT_GENOME000625_01944	GUT_GENOME213666_04691								GUT_GENOME096063_03265	GUT_GENOME142490_02548								GUT_GENOME000725_02188	GUT_GENOME262194_00987				GUT_GENOME284447_02543	GUT_GENOME199315_00067	GUT_GENOME234088_00862		GUT_GENOME155926_00908															GUT_GENOME096298_03215	GUT_GENOME096529_00176
				GUT_GENOME243928_00964	GUT_GENOME261291_01234								GUT_GENOME256155_01681	GUT_GENOME037555_00414								GUT_GENOME234729_00245	GUT_GENOME154740_01945				GUT_GENOME000166_00202	GUT_GENOME000469_00946	GUT_GENOME096063_00061		GUT_GENOME000092_02177															GUT_GENOME190431_00632	GUT_GENOME243009_00453
				GUT_GENOME018982_00278	GUT_GENOME254720_00762								GUT_GENOME096556_02359	GUT_GENOME000595_00211								GUT_GENOME143232_03266	GUT_GENOME217674_05897				GUT_GENOME143232_04631	GUT_GENOME080486_01159	GUT_GENOME143346_00878		GUT_GENOME233283_00712															GUT_GENOME243002_01224	GUT_GENOME246802_01139
				GUT_GENOME116934_00032	GUT_GENOME143411_01794								GUT_GENOME096573_01570	GUT_GENOME001417_00608								GUT_GENOME113527_01839	GUT_GENOME233265_01356				GUT_GENOME037806_02022	GUT_GENOME096168_00867	GUT_GENOME000271_02401		GUT_GENOME247791_01024															GUT_GENOME065504_02298	GUT_GENOME200047_00189
				GUT_GENOME143760_04296	GUT_GENOME186025_00584								GUT_GENOME171643_00742	GUT_GENOME103712_03321								GUT_GENOME096067_00958	GUT_GENOME201325_00266				GUT_GENOME239662_01038	GUT_GENOME285195_01529	GUT_GENOME248619_01562		GUT_GENOME244598_01113															GUT_GENOME000565_03426	GUT_GENOME010315_00944
				GUT_GENOME147524_04142	GUT_GENOME232008_04088								GUT_GENOME155164_00672	GUT_GENOME096494_01941								GUT_GENOME222694_03602	GUT_GENOME096533_04453				GUT_GENOME110705_01655	GUT_GENOME267498_00815	GUT_GENOME000139_02569		GUT_GENOME123416_01314															GUT_GENOME070485_00321	GUT_GENOME244162_00371
				GUT_GENOME243602_00931	GUT_GENOME000862_01869								GUT_GENOME140245_04250	GUT_GENOME113610_00442								GUT_GENOME217674_06500	GUT_GENOME140245_00143				GUT_GENOME069124_01546	GUT_GENOME147678_01787	GUT_GENOME247084_01653		GUT_GENOME207634_00083															GUT_GENOME001376_01002	GUT_GENOME170498_02002
				GUT_GENOME095973_01114	GUT_GENOME159262_01263								GUT_GENOME284003_00524	GUT_GENOME000575_02516								GUT_GENOME001120_01714	GUT_GENOME001255_00213				GUT_GENOME157951_01349	GUT_GENOME211264_02620	GUT_GENOME232220_03498		GUT_GENOME231320_02887															GUT_GENOME220495_00402	GUT_GENOME235903_00257
				GUT_GENOME270564_00208	GUT_GENOME143127_00618								GUT_GENOME001488_00080	GUT_GENOME007050_00613								GUT_GENOME138841_01407	GUT_GENOME235150_00287				GUT_GENOME084706_01952	GUT_GENOME096573_00183	GUT_GENOME009639_01295		GUT_GENOME009640_01726															GUT_GENOME018599_00195	GUT_GENOME029635_01197
				GUT_GENOME096213_00591	GUT_GENOME062469_00652								GUT_GENOME140330_02488	GUT_GENOME070341_02480								GUT_GENOME000655_01323	GUT_GENOME000554_03303				GUT_GENOME284447_00441	GUT_GENOME148915_00701	GUT_GENOME207869_03113		GUT_GENOME143522_01733															GUT_GENOME107771_00241	GUT_GENOME276430_00553
				GUT_GENOME000509_00710	GUT_GENOME111314_01962								GUT_GENOME096562_00731	GUT_GENOME113646_00128								GUT_GENOME115127_00571	GUT_GENOME096819_01420				GUT_GENOME096366_02867	GUT_GENOME251332_01133	GUT_GENOME197982_00011		GUT_GENOME239737_02569															GUT_GENOME255273_00748	GUT_GENOME170057_00995
				GUT_GENOME141436_05599	GUT_GENOME012053_00185								GUT_GENOME284688_00869	GUT_GENOME117118_00483								GUT_GENOME230902_03118	GUT_GENOME013431_01919				GUT_GENOME017938_01401	GUT_GENOME147131_02360	GUT_GENOME244253_00835		GUT_GENOME001440_02283															GUT_GENOME009549_00662	GUT_GENOME220383_00727
				GUT_GENOME143727_03265	GUT_GENOME140270_05314								GUT_GENOME198893_00681	GUT_GENOME155713_00462								GUT_GENOME096185_03082	GUT_GENOME022484_02702				GUT_GENOME229574_02270	GUT_GENOME253550_00546	GUT_GENOME143493_02088		GUT_GENOME000092_00469															GUT_GENOME148816_01208	GUT_GENOME043942_00781
				GUT_GENOME254213_01424	GUT_GENOME216302_00351								GUT_GENOME149380_03305	GUT_GENOME007523_01622								GUT_GENOME096203_00166	GUT_GENOME096513_00352				GUT_GENOME243880_02432	GUT_GENOME249991_00430	GUT_GENOME076493_00638		GUT_GENOME007858_00094															GUT_GENOME001853_00614	GUT_GENOME066135_01466
				GUT_GENOME198844_01532	GUT_GENOME141698_02053								GUT_GENOME096293_02766	GUT_GENOME143502_04104								GUT_GENOME096174_02862	GUT_GENOME105301_00875				GUT_GENOME096083_01743	GUT_GENOME284658_01613	GUT_GENOME282538_01153		GUT_GENOME146009_00608															GUT_GENOME171643_00830	GUT_GENOME148641_00251
				GUT_GENOME122227_01867	GUT_GENOME105496_00799								GUT_GENOME096473_04718	GUT_GENOME087442_01326								GUT_GENOME218243_01492	GUT_GENOME149574_01254				GUT_GENOME007446_02146	GUT_GENOME171597_00324	GUT_GENOME022392_01059		GUT_GENOME139637_01305															GUT_GENOME001355_00018	GUT_GENOME111762_00486
				GUT_GENOME008832_00440	GUT_GENOME096239_01503								GUT_GENOME258721_02339	GUT_GENOME231453_01593								GUT_GENOME001854_01636	GUT_GENOME221174_01530				GUT_GENOME000563_00024	GUT_GENOME147524_03529	GUT_GENOME000871_00566		GUT_GENOME143602_00108															GUT_GENOME247095_01997	GUT_GENOME148443_00561
				GUT_GENOME273451_01342	GUT_GENOME096535_01108								GUT_GENOME264873_00916	GUT_GENOME045767_01299								GUT_GENOME250527_01731	GUT_GENOME157138_00904				GUT_GENOME096538_00484	GUT_GENOME115838_01198	GUT_GENOME001340_00465		GUT_GENOME247791_00178															GUT_GENOME240252_00265	GUT_GENOME278559_00286
				GUT_GENOME143189_01393	GUT_GENOME143484_02959								GUT_GENOME096185_00598	GUT_GENOME158398_01882								GUT_GENOME140808_01184	GUT_GENOME098568_03837				GUT_GENOME140283_00217	GUT_GENOME097844_02012	GUT_GENOME243419_01677		GUT_GENOME200873_01826															GUT_GENOME070391_00291	GUT_GENOME143421_02514
				GUT_GENOME001056_02702	GUT_GENOME096466_01727								GUT_GENOME101260_01160	GUT_GENOME034317_01411								GUT_GENOME155674_00145	GUT_GENOME096295_02346				GUT_GENOME015477_01729	GUT_GENOME109801_02147	GUT_GENOME231436_01478		GUT_GENOME131085_01220															GUT_GENOME117621_01170	GUT_GENOME101256_01188
				GUT_GENOME143092_04359	GUT_GENOME095592_02146								GUT_GENOME229830_00294	GUT_GENOME000676_01190								GUT_GENOME009523_01076	GUT_GENOME114832_01149				GUT_GENOME143749_03321	GUT_GENOME096234_01511	GUT_GENOME200288_01686		GUT_GENOME145983_03540															GUT_GENOME257098_02179	GUT_GENOME000338_04067
				GUT_GENOME001659_00350	GUT_GENOME000963_04798								GUT_GENOME001418_00827	GUT_GENOME001282_01243								GUT_GENOME140082_00192	GUT_GENOME186054_00872				GUT_GENOME014141_01045	GUT_GENOME001189_03203	GUT_GENOME096381_03924		GUT_GENOME143527_00808															GUT_GENOME239028_01274	GUT_GENOME244349_01951
				GUT_GENOME285322_02446	GUT_GENOME024836_00897								GUT_GENOME138841_02277	GUT_GENOME138767_00712								GUT_GENOME261541_02318	GUT_GENOME010791_02195				GUT_GENOME000559_03233	GUT_GENOME179676_00424	GUT_GENOME141226_01369		GUT_GENOME246434_01723															GUT_GENOME096530_01473	GUT_GENOME117625_01590
				GUT_GENOME096366_00431	GUT_GENOME005683_01053								GUT_GENOME285659_02265	GUT_GENOME096509_00919								GUT_GENOME001488_02002	GUT_GENOME139932_00816				GUT_GENOME276506_02052	GUT_GENOME172932_03904	GUT_GENOME095996_03488		GUT_GENOME234569_01749															GUT_GENOME009565_00482	GUT_GENOME143527_03329
				GUT_GENOME151605_00684	GUT_GENOME078306_00909								GUT_GENOME156895_00607	GUT_GENOME140299_02389								GUT_GENOME141425_02130	GUT_GENOME149380_01556				GUT_GENOME140074_02305	GUT_GENOME096213_01784	GUT_GENOME001779_01219		GUT_GENOME247103_02046															GUT_GENOME130638_01533	GUT_GENOME000624_00883
				GUT_GENOME140076_01502	GUT_GENOME141284_03283								GUT_GENOME001208_00056	GUT_GENOME134977_01370								GUT_GENOME001255_01447	GUT_GENOME175097_01390				GUT_GENOME276270_00542	GUT_GENOME268069_00641	GUT_GENOME251937_00732		GUT_GENOME146010_04923															GUT_GENOME215793_01201	GUT_GENOME089884_01552
				GUT_GENOME004694_00909	GUT_GENOME103863_02714								GUT_GENOME115718_00298	GUT_GENOME282114_01014								GUT_GENOME261061_02441	GUT_GENOME096192_00815				GUT_GENOME140076_05381	GUT_GENOME225784_01073	GUT_GENOME096300_03962		GUT_GENOME170467_00472															GUT_GENOME096020_02140	GUT_GENOME047636_00169
				GUT_GENOME110741_02978	GUT_GENOME000137_01719								GUT_GENOME095981_01571	GUT_GENOME143747_01636								GUT_GENOME268486_01416	GUT_GENOME140245_02958				GUT_GENOME275692_02705	GUT_GENOME213516_00943	GUT_GENOME103765_02652		GUT_GENOME001636_01655															GUT_GENOME000001_01287	GUT_GENOME261446_01669
				GUT_GENOME000625_01807	GUT_GENOME096540_02559								GUT_GENOME000564_00382	GUT_GENOME226303_00086								GUT_GENOME234656_00719	GUT_GENOME236889_01904				GUT_GENOME206071_01703	GUT_GENOME143723_03698	GUT_GENOME015477_01729		GUT_GENOME000571_00638															GUT_GENOME022845_00141	GUT_GENOME206730_00119
				GUT_GENOME115935_00123	GUT_GENOME231710_00061								GUT_GENOME140235_02638	GUT_GENOME286625_01304								GUT_GENOME251015_00012	GUT_GENOME103863_02432				GUT_GENOME140245_04477	GUT_GENOME000496_00415	GUT_GENOME105698_00164		GUT_GENOME001635_01093															GUT_GENOME096485_01021	GUT_GENOME071027_00990
				GUT_GENOME094927_01032	GUT_GENOME231453_04208								GUT_GENOME098792_01474	GUT_GENOME218246_01878								GUT_GENOME232008_04157	GUT_GENOME000944_03183				GUT_GENOME143726_00410	GUT_GENOME128610_01730	GUT_GENOME244286_02122		GUT_GENOME103863_00481															GUT_GENOME140393_01958	GUT_GENOME140329_01702
				GUT_GENOME000931_01373	GUT_GENOME143124_03056								GUT_GENOME258847_02590	GUT_GENOME143751_03082								GUT_GENOME143484_04483	GUT_GENOME030016_00519				GUT_GENOME095995_03860	GUT_GENOME282678_00024	GUT_GENOME000594_00977		GUT_GENOME000994_02114															GUT_GENOME113180_01052	GUT_GENOME061059_00228
				GUT_GENOME096301_00574	GUT_GENOME212260_03030								GUT_GENOME156224_01777	GUT_GENOME095939_01412								GUT_GENOME182311_00002	GUT_GENOME222694_01363				GUT_GENOME104639_01751	GUT_GENOME255999_01769	GUT_GENOME140272_00543		GUT_GENOME281896_00107															GUT_GENOME096124_01238	GUT_GENOME275558_00091
				GUT_GENOME000236_02366	GUT_GENOME105885_02542								GUT_GENOME145983_02457	GUT_GENOME283113_01600								GUT_GENOME000563_03967	GUT_GENOME253078_01317				GUT_GENOME007797_01893	GUT_GENOME237335_02408	GUT_GENOME279170_00286		GUT_GENOME142031_04698															GUT_GENOME143379_01587	GUT_GENOME090940_00340
				GUT_GENOME273130_00806	GUT_GENOME000113_01662								GUT_GENOME239728_03247	GUT_GENOME218246_00996								GUT_GENOME016875_02557	GUT_GENOME257495_00303				GUT_GENOME147854_03951	GUT_GENOME140340_00658	GUT_GENOME276506_02052		GUT_GENOME015136_01272															GUT_GENOME096490_00309	GUT_GENOME284947_01186
				GUT_GENOME176629_01593	GUT_GENOME000967_02205								GUT_GENOME095993_01334	GUT_GENOME000862_01212								GUT_GENOME015556_01029	GUT_GENOME260294_01253				GUT_GENOME015136_01742	GUT_GENOME001419_01726	GUT_GENOME015047_00149		GUT_GENOME001373_01094															GUT_GENOME000017_02741	GUT_GENOME235173_01569
				GUT_GENOME159364_01130	GUT_GENOME096250_00095								GUT_GENOME001139_00451	GUT_GENOME096489_01828								GUT_GENOME120108_00960	GUT_GENOME236883_00393				GUT_GENOME044788_00576	GUT_GENOME154740_02129	GUT_GENOME176629_00640		GUT_GENOME257151_00316															GUT_GENOME254792_01149	GUT_GENOME219102_01303
				GUT_GENOME283627_01227	GUT_GENOME239663_00579								GUT_GENOME009334_00303	GUT_GENOME095296_00244								GUT_GENOME000220_01130	GUT_GENOME143407_01616				GUT_GENOME000221_03968	GUT_GENOME219168_00535	GUT_GENOME000290_00147		GUT_GENOME171567_01960															GUT_GENOME103750_02782	GUT_GENOME190431_00632
				GUT_GENOME176035_00859	GUT_GENOME177790_01457								GUT_GENOME156969_00276	GUT_GENOME096378_00748								GUT_GENOME096228_04428	GUT_GENOME000729_00606				GUT_GENOME095942_02496	GUT_GENOME140311_00292	GUT_GENOME130633_01428		GUT_GENOME077606_00401															GUT_GENOME000219_01440	GUT_GENOME096298_03215
				GUT_GENOME001488_00262	GUT_GENOME171356_02379								GUT_GENOME235150_00868	GUT_GENOME046227_00815								GUT_GENOME207259_00842	GUT_GENOME000133_02620				GUT_GENOME000269_01643	GUT_GENOME249851_00648	GUT_GENOME141763_04101		GUT_GENOME096124_02789															GUT_GENOME096512_02353	GUT_GENOME119698_01930
				GUT_GENOME096298_01959	GUT_GENOME147524_05318								GUT_GENOME207787_00888	GUT_GENOME141003_00143								GUT_GENOME253287_04257	GUT_GENOME000221_00744				GUT_GENOME000192_01959	GUT_GENOME111334_01715	GUT_GENOME253901_00644		GUT_GENOME065650_00576															GUT_GENOME057672_01771	GUT_GENOME158142_00372
				GUT_GENOME025412_00532	GUT_GENOME103863_00300								GUT_GENOME207259_02340	GUT_GENOME286118_00898								GUT_GENOME143505_01464	GUT_GENOME013049_00769				GUT_GENOME229830_03410	GUT_GENOME096179_02555	GUT_GENOME143282_02248		GUT_GENOME209802_01948															GUT_GENOME150307_00668	GUT_GENOME108408_00636
				GUT_GENOME001877_01884	GUT_GENOME269664_00435								GUT_GENOME001208_00207	GUT_GENOME096533_02158								GUT_GENOME096203_02310	GUT_GENOME000767_02971				GUT_GENOME239280_01613	GUT_GENOME096551_02881	GUT_GENOME096128_01438		GUT_GENOME176758_01684															GUT_GENOME207893_00206	GUT_GENOME170405_00848
				GUT_GENOME029877_00434	GUT_GENOME093619_00189								GUT_GENOME243928_01952	GUT_GENOME243236_01045								GUT_GENOME090701_01226	GUT_GENOME231250_00072				GUT_GENOME170652_01482	GUT_GENOME133541_01898	GUT_GENOME115419_01952		GUT_GENOME159567_00939															GUT_GENOME005382_01528	GUT_GENOME155267_01574
				GUT_GENOME057686_01333	GUT_GENOME015136_00790								GUT_GENOME118228_02954	GUT_GENOME256509_00024								GUT_GENOME263189_00185	GUT_GENOME284693_00977				GUT_GENOME140240_04115	GUT_GENOME096294_01589	GUT_GENOME140365_03065		GUT_GENOME001208_02339															GUT_GENOME116287_01358	GUT_GENOME100497_00856
				GUT_GENOME185532_03770	GUT_GENOME095230_02300								GUT_GENOME096366_00295	GUT_GENOME103751_00915								GUT_GENOME243928_00043	GUT_GENOME143232_00950				GUT_GENOME004992_00119	GUT_GENOME083570_00563	GUT_GENOME000575_00728		GUT_GENOME001056_00722															GUT_GENOME256520_00735	GUT_GENOME239028_01274
				GUT_GENOME267425_00727	GUT_GENOME025996_00116								GUT_GENOME000595_00211	GUT_GENOME032405_00801								GUT_GENOME247455_01803	GUT_GENOME257098_00245				GUT_GENOME019335_00765	GUT_GENOME096556_01263	GUT_GENOME026473_00852		GUT_GENOME143726_03932															GUT_GENOME096250_01693	GUT_GENOME000001_01287
				GUT_GENOME096298_02110	GUT_GENOME105885_02770								GUT_GENOME044788_01740	GUT_GENOME000711_01248								GUT_GENOME034178_01640	GUT_GENOME161370_00005				GUT_GENOME096083_03694	GUT_GENOME162087_01247	GUT_GENOME035196_00224		GUT_GENOME103705_02984															GUT_GENOME172932_00235	GUT_GENOME140393_01958
				GUT_GENOME095996_01646	GUT_GENOME095952_01224								GUT_GENOME283137_02307	GUT_GENOME096462_00329								GUT_GENOME239662_01788	GUT_GENOME000625_04487				GUT_GENOME010023_01769	GUT_GENOME044018_02167	GUT_GENOME176629_00278		GUT_GENOME015477_01217															GUT_GENOME158618_01548	GUT_GENOME113180_01052
				GUT_GENOME138767_00786	GUT_GENOME096670_02519								GUT_GENOME001417_00608	GUT_GENOME175345_00486								GUT_GENOME149380_03000	GUT_GENOME110741_01034				GUT_GENOME140074_02011	GUT_GENOME215898_01726	GUT_GENOME103712_02766		GUT_GENOME268227_02002															GUT_GENOME143489_01410	GUT_GENOME047905_00384
				GUT_GENOME008785_00409	GUT_GENOME270687_00943								GUT_GENOME172376_01047	GUT_GENOME154813_01213								GUT_GENOME069124_00693	GUT_GENOME254230_01485				GUT_GENOME000225_00930	GUT_GENOME254096_01108	GUT_GENOME033647_01484		GUT_GENOME239280_00156															GUT_GENOME213359_01688	GUT_GENOME096124_01238
				GUT_GENOME270508_01423	GUT_GENOME000137_01053								GUT_GENOME041343_00643	GUT_GENOME239690_04751								GUT_GENOME000035_02786	GUT_GENOME000513_02862				GUT_GENOME103766_03028	GUT_GENOME239761_00345	GUT_GENOME138783_01741		GUT_GENOME161370_02333															GUT_GENOME143346_00591	GUT_GENOME000219_01440
				GUT_GENOME000225_00015	GUT_GENOME095986_03812								GUT_GENOME102353_03687	GUT_GENOME253217_01383								GUT_GENOME096191_02543	GUT_GENOME163027_00013				GUT_GENOME102790_00973	GUT_GENOME126659_00411	GUT_GENOME030277_00719		GUT_GENOME239673_00811															GUT_GENOME147149_01335	GUT_GENOME000017_02741
				GUT_GENOME000564_00299	GUT_GENOME096179_02572								GUT_GENOME122330_00251	GUT_GENOME014975_00577								GUT_GENOME157213_00669	GUT_GENOME001749_00484				GUT_GENOME101260_01536	GUT_GENOME138841_00075	GUT_GENOME260957_01636		GUT_GENOME000057_03407															GUT_GENOME143092_03732	GUT_GENOME235146_00884
				GUT_GENOME095973_01091	GUT_GENOME146008_02028								GUT_GENOME000152_01305	GUT_GENOME145582_03235								GUT_GENOME069692_00536	GUT_GENOME066225_00312				GUT_GENOME140808_01221	GUT_GENOME096176_01536	GUT_GENOME141284_02451		GUT_GENOME208036_03588															GUT_GENOME145980_03439	GUT_GENOME096512_02353
				GUT_GENOME009640_00779	GUT_GENOME112667_00681								GUT_GENOME001341_02418	GUT_GENOME000725_01664								GUT_GENOME102034_01968	GUT_GENOME115272_00972				GUT_GENOME139744_00935	GUT_GENOME157213_01981	GUT_GENOME095650_00374		GUT_GENOME139634_00626															GUT_GENOME139923_00998	GUT_GENOME255416_00723
				GUT_GENOME138767_00970	GUT_GENOME111314_01090								GUT_GENOME142396_01338	GUT_GENOME145980_03145								GUT_GENOME096511_03293	GUT_GENOME098568_05680				GUT_GENOME101636_02228	GUT_GENOME276949_00812	GUT_GENOME227559_02082		GUT_GENOME096442_03901															GUT_GENOME218592_00354	GUT_GENOME157265_00345
				GUT_GENOME017597_01368	GUT_GENOME061534_01068								GUT_GENOME279576_01444	GUT_GENOME001364_02558								GUT_GENOME106027_01381	GUT_GENOME254490_00456				GUT_GENOME000192_02260	GUT_GENOME142418_02383	GUT_GENOME014311_00625		GUT_GENOME113217_00264															GUT_GENOME024564_00302	GUT_GENOME265996_00706
				GUT_GENOME262194_01167	GUT_GENOME270878_01341								GUT_GENOME205964_02140	GUT_GENOME096459_02288								GUT_GENOME001635_00947	GUT_GENOME152364_01744				GUT_GENOME143188_00596	GUT_GENOME193237_00505	GUT_GENOME140074_02011		GUT_GENOME279989_01048															GUT_GENOME000147_00148	GUT_GENOME251611_00664
				GUT_GENOME018957_01381	GUT_GENOME141315_00586								GUT_GENOME000192_01593	GUT_GENOME141101_01329								GUT_GENOME159262_01652	GUT_GENOME187127_00517				GUT_GENOME238262_01473	GUT_GENOME096301_02225	GUT_GENOME015047_00697		GUT_GENOME147678_02146															GUT_GENOME140246_00804	GUT_GENOME252293_00719
				GUT_GENOME157750_00986	GUT_GENOME143380_01704								GUT_GENOME284447_01857	GUT_GENOME142625_03055								GUT_GENOME105301_02820	GUT_GENOME009549_00182				GUT_GENOME105347_01407	GUT_GENOME098616_01199	GUT_GENOME103766_03028		GUT_GENOME000232_01645															GUT_GENOME251083_01943	GUT_GENOME281910_00392
				GUT_GENOME142612_03539	GUT_GENOME096568_02259								GUT_GENOME128517_01803	GUT_GENOME239704_00446								GUT_GENOME115935_00349	GUT_GENOME237445_00119				GUT_GENOME001029_02207	GUT_GENOME135207_01123	GUT_GENOME096445_01408		GUT_GENOME013062_01557															GUT_GENOME214864_00623	GUT_GENOME098162_00043
				GUT_GENOME114679_02433	GUT_GENOME145582_01336								GUT_GENOME098798_00808	GUT_GENOME142015_01687								GUT_GENOME164255_01418	GUT_GENOME096431_02931				GUT_GENOME113322_01731	GUT_GENOME000231_00873	GUT_GENOME133171_00760		GUT_GENOME261061_01777															GUT_GENOME001039_02005	GUT_GENOME096407_01501
				GUT_GENOME242337_03006	GUT_GENOME087397_01502								GUT_GENOME143502_04104	GUT_GENOME244953_00734								GUT_GENOME108993_01171	GUT_GENOME140299_01831				GUT_GENOME110705_00584	GUT_GENOME238251_01346	GUT_GENOME207869_02839		GUT_GENOME098909_00447															GUT_GENOME155718_00054	GUT_GENOME143092_03732
				GUT_GENOME141334_02147	GUT_GENOME008152_00296								GUT_GENOME231812_01570	GUT_GENOME142596_01781								GUT_GENOME096063_00871	GUT_GENOME155041_01453				GUT_GENOME152519_02109	GUT_GENOME172932_00270	GUT_GENOME229012_02422		GUT_GENOME242920_01452															GUT_GENOME000659_02191	GUT_GENOME282538_01971
				GUT_GENOME231812_00807	GUT_GENOME139200_00161								GUT_GENOME254013_01000	GUT_GENOME066135_00661								GUT_GENOME115419_02239	GUT_GENOME258883_02699				GUT_GENOME034955_00718	GUT_GENOME098912_00220	GUT_GENOME037977_00302		GUT_GENOME121215_00002															GUT_GENOME096537_01603	GUT_GENOME158638_00632
				GUT_GENOME142031_00613	GUT_GENOME000496_02180								GUT_GENOME231453_01593	GUT_GENOME242764_00824								GUT_GENOME096246_02212	GUT_GENOME096240_01676				GUT_GENOME033290_01957	GUT_GENOME001635_03073	GUT_GENOME023976_00324		GUT_GENOME002382_01721															GUT_GENOME000010_02647	GUT_GENOME000603_01180
				GUT_GENOME140233_02981	GUT_GENOME201215_01060								GUT_GENOME120108_03118	GUT_GENOME251983_01221								GUT_GENOME218891_02403	GUT_GENOME246434_00541				GUT_GENOME018576_01641	GUT_GENOME197471_00628	GUT_GENOME142610_05731		GUT_GENOME096706_00895															GUT_GENOME145582_00651	GUT_GENOME251083_01943
				GUT_GENOME177471_02658	GUT_GENOME274466_02336								GUT_GENOME009523_00673	GUT_GENOME232218_01553								GUT_GENOME127500_00425	GUT_GENOME116219_01332				GUT_GENOME033875_00129	GUT_GENOME046050_01429	GUT_GENOME254096_02313		GUT_GENOME001575_02600															GUT_GENOME016749_01045	GUT_GENOME155718_00054
				GUT_GENOME244286_00413	GUT_GENOME244286_00908								GUT_GENOME000944_00921	GUT_GENOME143726_02075								GUT_GENOME096206_02083	GUT_GENOME175554_00259				GUT_GENOME140330_00308	GUT_GENOME074354_02006	GUT_GENOME101940_00383		GUT_GENOME095967_02400															GUT_GENOME094675_00554	GUT_GENOME105321_01680
				GUT_GENOME076493_00618	GUT_GENOME096402_02250								GUT_GENOME263189_00268	GUT_GENOME096276_00151								GUT_GENOME239725_00105	GUT_GENOME274864_00095				GUT_GENOME108993_02969	GUT_GENOME000608_02384	GUT_GENOME096381_04862		GUT_GENOME145980_03485															GUT_GENOME146003_02993	GUT_GENOME096389_02037
				GUT_GENOME096384_04363	GUT_GENOME171648_04347								GUT_GENOME019335_00132	GUT_GENOME207259_02286								GUT_GENOME217674_01259	GUT_GENOME265746_00526				GUT_GENOME001575_00539	GUT_GENOME142396_01850	GUT_GENOME096506_00585		GUT_GENOME001379_01716															GUT_GENOME098777_02191	GUT_GENOME145582_00651
				GUT_GENOME155674_00242	GUT_GENOME016749_01614								GUT_GENOME101082_01192	GUT_GENOME096298_03567								GUT_GENOME001778_02823	GUT_GENOME203592_00609				GUT_GENOME284447_00364	GUT_GENOME146008_00555	GUT_GENOME014491_01696		GUT_GENOME125072_00034															GUT_GENOME138783_00449	GUT_GENOME013963_01314
				GUT_GENOME108993_02074	GUT_GENOME096478_00316								GUT_GENOME000035_00425	GUT_GENOME102441_01490								GUT_GENOME082534_00353	GUT_GENOME140082_01623				GUT_GENOME095021_01379	GUT_GENOME010023_00739	GUT_GENOME171648_02513		GUT_GENOME155275_00801															GUT_GENOME231730_02549	GUT_GENOME277093_00971
				GUT_GENOME060514_00142	GUT_GENOME283050_00947								GUT_GENOME229574_00296	GUT_GENOME244286_02100								GUT_GENOME133541_00529	GUT_GENOME283937_01196				GUT_GENOME108993_02475	GUT_GENOME000299_02765	GUT_GENOME001340_00334		GUT_GENOME057155_00022															GUT_GENOME096670_00503	GUT_GENOME235948_01317
				GUT_GENOME178919_02493	GUT_GENOME010448_00048								GUT_GENOME096293_01786	GUT_GENOME092360_00100								GUT_GENOME099131_00170	GUT_GENOME096080_03616				GUT_GENOME143723_03161	GUT_GENOME024712_00250	GUT_GENOME096213_00335		GUT_GENOME243939_00379															GUT_GENOME027748_00400	GUT_GENOME027748_00400
				GUT_GENOME023484_00976	GUT_GENOME183568_01985								GUT_GENOME096191_01348	GUT_GENOME140270_02281								GUT_GENOME232032_04672	GUT_GENOME141068_05518				GUT_GENOME247421_02151	GUT_GENOME140808_01462	GUT_GENOME085442_01233		GUT_GENOME083450_01707															GUT_GENOME235948_01317	GUT_GENOME112054_01030
				GUT_GENOME103749_03046	GUT_GENOME264037_00107								GUT_GENOME118228_03015	GUT_GENOME034989_01199								GUT_GENOME128517_00123	GUT_GENOME105885_00288				GUT_GENOME096556_02941	GUT_GENOME000035_04699	GUT_GENOME096393_01776		GUT_GENOME172958_03013															GUT_GENOME196908_01351	GUT_GENOME209802_00599
				GUT_GENOME226927_00403	GUT_GENOME141118_00080								GUT_GENOME014491_01078	GUT_GENOME093688_01420								GUT_GENOME063091_01842	GUT_GENOME251930_00262				GUT_GENOME274122_00394	GUT_GENOME001418_02675	GUT_GENOME001401_00642		GUT_GENOME001401_01895															GUT_GENOME209802_00599	GUT_GENOME095922_00771
				GUT_GENOME127776_00775	GUT_GENOME119700_01079								GUT_GENOME001282_01243	GUT_GENOME244383_01534								GUT_GENOME249268_01809	GUT_GENOME096470_00273				GUT_GENOME103705_01530	GUT_GENOME182432_00324	GUT_GENOME096559_04313		GUT_GENOME098331_00852															GUT_GENOME096494_02777	GUT_GENOME114842_00263
				GUT_GENOME140233_00176	GUT_GENOME095336_00355								GUT_GENOME034317_01411	GUT_GENOME196908_02018								GUT_GENOME236889_01320	GUT_GENOME096513_02234				GUT_GENOME001506_03256	GUT_GENOME161997_00839	GUT_GENOME000603_00675		GUT_GENOME000706_00525															GUT_GENOME207884_01317	GUT_GENOME203607_00933
				GUT_GENOME000564_01773	GUT_GENOME142496_02436								GUT_GENOME090533_00995	GUT_GENOME096271_02014								GUT_GENOME002158_04340	GUT_GENOME196481_00060				GUT_GENOME096256_00884	GUT_GENOME142031_01434	GUT_GENOME238250_01267		GUT_GENOME007005_02823															GUT_GENOME243200_01188	GUT_GENOME141041_03471
				GUT_GENOME207634_01747	GUT_GENOME001373_02405								GUT_GENOME065630_00492	GUT_GENOME000141_00510								GUT_GENOME113217_00069	GUT_GENOME143752_02021				GUT_GENOME024079_00244	GUT_GENOME029301_01804	GUT_GENOME247623_01124		GUT_GENOME284015_01997															GUT_GENOME095952_01839	GUT_GENOME145984_02503
				GUT_GENOME095996_03252	GUT_GENOME285134_02174								GUT_GENOME140299_02389	GUT_GENOME096300_03719								GUT_GENOME096174_02404	GUT_GENOME254699_02005				GUT_GENOME096563_03371	GUT_GENOME145378_01737	GUT_GENOME000047_00591		GUT_GENOME226406_01868															GUT_GENOME095850_00454	GUT_GENOME143493_00804
				GUT_GENOME096080_01227	GUT_GENOME096250_02834								GUT_GENOME147598_01911	GUT_GENOME096513_01863								GUT_GENOME143711_03211	GUT_GENOME238258_01639				GUT_GENOME253287_01986	GUT_GENOME025412_00830	GUT_GENOME261541_02173		GUT_GENOME273305_00753															GUT_GENOME251925_02013	GUT_GENOME158837_00220
				GUT_GENOME239673_02574	GUT_GENOME232194_00335								GUT_GENOME134977_01370	GUT_GENOME143749_00922								GUT_GENOME142497_02687	GUT_GENOME022484_01918				GUT_GENOME018981_01408	GUT_GENOME129169_01271	GUT_GENOME102720_01223		GUT_GENOME201393_00006															GUT_GENOME103762_02556	GUT_GENOME122072_00338
				GUT_GENOME018858_00772	GUT_GENOME270175_00395								GUT_GENOME143747_01636	GUT_GENOME171356_04213								GUT_GENOME258721_00427	GUT_GENOME250728_00903				GUT_GENOME239747_01549	GUT_GENOME066568_00650	GUT_GENOME146010_00872		GUT_GENOME001297_02792															GUT_GENOME018981_00515	GUT_GENOME011267_00413
				GUT_GENOME231431_01035	GUT_GENOME103882_02316								GUT_GENOME226303_00086	GUT_GENOME107760_01987								GUT_GENOME253356_01309	GUT_GENOME272760_00307				GUT_GENOME139132_01008	GUT_GENOME143760_02144	GUT_GENOME243082_02461		GUT_GENOME165741_02349															GUT_GENOME234570_01911	GUT_GENOME137034_01672
				GUT_GENOME098572_00474	GUT_GENOME196097_00681								GUT_GENOME142411_00383	GUT_GENOME142458_01047								GUT_GENOME099131_01175	GUT_GENOME138841_00378				GUT_GENOME215793_01491	GUT_GENOME096298_04375	GUT_GENOME103718_01556		GUT_GENOME096458_03499															GUT_GENOME152604_00371	GUT_GENOME001440_01098
				GUT_GENOME000594_04772	GUT_GENOME007529_00122								GUT_GENOME247084_01292	GUT_GENOME103882_00803								GUT_GENOME258758_00178	GUT_GENOME286118_01469				GUT_GENOME246421_01506	GUT_GENOME087542_00742	GUT_GENOME001416_00053		GUT_GENOME233265_01537															GUT_GENOME145984_02503	GUT_GENOME242337_01326
				GUT_GENOME220383_00888	GUT_GENOME253901_00595								GUT_GENOME143751_03082	GUT_GENOME284343_00825								GUT_GENOME113527_00624	GUT_GENOME001745_03492				GUT_GENOME120040_00768	GUT_GENOME193885_01070	GUT_GENOME096256_00884		GUT_GENOME000205_02907															GUT_GENOME156244_00683	GUT_GENOME245894_00776
				GUT_GENOME108995_01902	GUT_GENOME000566_00071								GUT_GENOME000595_00653	GUT_GENOME096384_02625								GUT_GENOME001745_00350	GUT_GENOME064659_01621				GUT_GENOME156886_02943	GUT_GENOME257001_01721	GUT_GENOME206098_01579		GUT_GENOME141068_02772															GUT_GENOME158837_00220	GUT_GENOME239582_01745
				GUT_GENOME262105_02303	GUT_GENOME096179_02471								GUT_GENOME153760_01263	GUT_GENOME143746_02539								GUT_GENOME078848_00510	GUT_GENOME143190_02822				GUT_GENOME247103_01031	GUT_GENOME014555_00026	GUT_GENOME142418_00179		GUT_GENOME017828_00031															GUT_GENOME254353_01954	GUT_GENOME026742_01375
				GUT_GENOME112856_00673	GUT_GENOME201992_00191								GUT_GENOME225807_00387	GUT_GENOME246864_00776								GUT_GENOME254490_00446	GUT_GENOME090701_02150				GUT_GENOME152489_00419	GUT_GENOME080199_00719	GUT_GENOME096189_05781		GUT_GENOME000623_02960															GUT_GENOME153042_01256	GUT_GENOME239074_01152
				GUT_GENOME211901_00814	GUT_GENOME244427_00742								GUT_GENOME007443_00728	GUT_GENOME096390_02844								GUT_GENOME096415_02968	GUT_GENOME196774_00607				GUT_GENOME016361_01098	GUT_GENOME196563_00573	GUT_GENOME022794_00286		GUT_GENOME033131_01715															GUT_GENOME078217_00893	GUT_GENOME246096_00009
				GUT_GENOME145980_03156	GUT_GENOME096213_00394								GUT_GENOME152999_00236	GUT_GENOME096480_01803								GUT_GENOME017597_00800	GUT_GENOME257069_00469				GUT_GENOME087442_01609	GUT_GENOME140283_00217	GUT_GENOME023366_01201		GUT_GENOME065504_01928															GUT_GENOME141118_03533	GUT_GENOME046050_00846
				GUT_GENOME095938_02039	GUT_GENOME096543_03108								GUT_GENOME096172_00145	GUT_GENOME207226_01447								GUT_GENOME140330_01481	GUT_GENOME185532_03125				GUT_GENOME154740_01314	GUT_GENOME027582_01545	GUT_GENOME009669_01594		GUT_GENOME000706_02662															GUT_GENOME232218_00706	GUT_GENOME096467_01813
				GUT_GENOME258883_01500	GUT_GENOME000963_04602								GUT_GENOME141059_03199	GUT_GENOME096512_00933								GUT_GENOME253287_00836	GUT_GENOME019305_00291				GUT_GENOME108259_00104	GUT_GENOME059153_01312	GUT_GENOME001223_01522		GUT_GENOME237866_00929															GUT_GENOME096497_02518	GUT_GENOME206098_01152
				GUT_GENOME096173_01137	GUT_GENOME234088_00168								GUT_GENOME250527_00624	GUT_GENOME228008_01351								GUT_GENOME140076_00847	GUT_GENOME206574_00906				GUT_GENOME235498_00667	GUT_GENOME140076_05381	GUT_GENOME096470_02661		GUT_GENOME147598_00182															GUT_GENOME000319_01899	GUT_GENOME088940_01349
				GUT_GENOME147524_02246	GUT_GENOME114329_00835								GUT_GENOME248256_00077	GUT_GENOME276270_00158								GUT_GENOME069692_02578	GUT_GENOME140411_02912				GUT_GENOME101256_01017	GUT_GENOME096063_00294	GUT_GENOME194757_03005		GUT_GENOME155439_01319															GUT_GENOME207866_01159	GUT_GENOME242998_00123
				GUT_GENOME166385_00050	GUT_GENOME140411_00385								GUT_GENOME029877_02308	GUT_GENOME147542_02308								GUT_GENOME263189_02533	GUT_GENOME087598_01595				GUT_GENOME000057_03245	GUT_GENOME027572_01652	GUT_GENOME007711_01846		GUT_GENOME155972_00607															GUT_GENOME282466_00706	GUT_GENOME008332_01346
				GUT_GENOME001135_02563	GUT_GENOME140826_02657								GUT_GENOME140245_03119	GUT_GENOME142578_01180								GUT_GENOME096203_00300	GUT_GENOME000963_05329				GUT_GENOME153760_02163	GUT_GENOME248004_01631	GUT_GENOME001416_01466		GUT_GENOME198628_00717															GUT_GENOME137034_01672	GUT_GENOME097137_00360
				GUT_GENOME242337_00710	GUT_GENOME108995_00988								GUT_GENOME096240_01513	GUT_GENOME259567_01226								GUT_GENOME117619_00983	GUT_GENOME251243_00194				GUT_GENOME000554_02122	GUT_GENOME239538_01097	GUT_GENOME250728_02669		GUT_GENOME096332_00817															GUT_GENOME001440_01098	GUT_GENOME060651_01039
				GUT_GENOME098042_02665	GUT_GENOME125826_01933								GUT_GENOME095991_00540	GUT_GENOME025761_01809								GUT_GENOME258721_01934	GUT_GENOME009178_01167				GUT_GENOME098568_03686	GUT_GENOME064466_00615	GUT_GENOME207056_00554		GUT_GENOME140245_02530															GUT_GENOME121628_01138	GUT_GENOME078306_00856
				GUT_GENOME233273_02678	GUT_GENOME231247_02588								GUT_GENOME140251_01713	GUT_GENOME096158_00480								GUT_GENOME143484_01042	GUT_GENOME108993_02375				GUT_GENOME037806_00656	GUT_GENOME163441_01479	GUT_GENOME157191_01843		GUT_GENOME250439_00414															GUT_GENOME242337_01326	GUT_GENOME096502_01652
				GUT_GENOME000980_01398	GUT_GENOME269664_00851								GUT_GENOME208016_01214	GUT_GENOME143421_02189								GUT_GENOME229830_00484	GUT_GENOME094660_00468				GUT_GENOME096485_05542	GUT_GENOME087542_01627	GUT_GENOME096468_02996		GUT_GENOME141047_01562															GUT_GENOME103765_02787	GUT_GENOME190114_00233
				GUT_GENOME234802_00096	GUT_GENOME096560_02638								GUT_GENOME095296_00244	GUT_GENOME231559_00470								GUT_GENOME113527_00902	GUT_GENOME151520_00409				GUT_GENOME000122_01998	GUT_GENOME096556_01948	GUT_GENOME239144_00704		GUT_GENOME038202_02187															GUT_GENOME242920_00690	GUT_GENOME143497_02595
				GUT_GENOME192714_01216	GUT_GENOME260294_01258								GUT_GENOME029780_01188	GUT_GENOME096213_00561								GUT_GENOME111543_01243	GUT_GENOME101940_02602				GUT_GENOME096191_01971	GUT_GENOME095962_02173	GUT_GENOME096449_00687		GUT_GENOME000725_03762															GUT_GENOME141734_04218	GUT_GENOME235148_00442
				GUT_GENOME271118_00011	GUT_GENOME279866_02859								GUT_GENOME174135_00182	GUT_GENOME109880_01141								GUT_GENOME145698_04510	GUT_GENOME231418_00717				GUT_GENOME143188_01243	GUT_GENOME199169_00502	GUT_GENOME262257_01023		GUT_GENOME103751_04123															GUT_GENOME232852_00921	GUT_GENOME006135_00482
				GUT_GENOME096866_01334	GUT_GENOME140337_01571								GUT_GENOME000554_01601	GUT_GENOME022908_01511								GUT_GENOME102353_02102	GUT_GENOME127797_00941				GUT_GENOME096080_01889	GUT_GENOME017612_00567	GUT_GENOME000979_01371		GUT_GENOME143723_01479															GUT_GENOME103749_01882	GUT_GENOME266163_02051
				GUT_GENOME255792_00162	GUT_GENOME095978_00326								GUT_GENOME014491_00528	GUT_GENOME143282_02278								GUT_GENOME127500_00728	GUT_GENOME161370_00032				GUT_GENOME000655_02931	GUT_GENOME258001_00240	GUT_GENOME233266_01816		GUT_GENOME095995_01571															GUT_GENOME276476_00104	GUT_GENOME129586_01737
				GUT_GENOME277334_01410	GUT_GENOME140361_02930								GUT_GENOME231431_01704	GUT_GENOME080199_02261								GUT_GENOME140240_04197	GUT_GENOME005654_01823				GUT_GENOME096083_03041	GUT_GENOME145695_00862	GUT_GENOME218039_00804		GUT_GENOME001115_03125															GUT_GENOME245661_00334	GUT_GENOME247421_01339
				GUT_GENOME256101_00310	GUT_GENOME000259_04380								GUT_GENOME103751_00915	GUT_GENOME226303_01303								GUT_GENOME249859_00397	GUT_GENOME114832_00827				GUT_GENOME109093_00508	GUT_GENOME215548_00393	GUT_GENOME232302_03784		GUT_GENOME000131_02716															GUT_GENOME231453_04094	GUT_GENOME103727_00107
				GUT_GENOME096213_00883	GUT_GENOME126570_01377								GUT_GENOME001745_02348	GUT_GENOME231257_03177								GUT_GENOME217674_06276	GUT_GENOME143202_02158				GUT_GENOME147854_03483	GUT_GENOME231309_00280	GUT_GENOME147523_00574		GUT_GENOME098775_01030															GUT_GENOME048628_01638	GUT_GENOME009953_01758
				GUT_GENOME048181_00201	GUT_GENOME143711_03514								GUT_GENOME143727_00262	GUT_GENOME096435_02568								GUT_GENOME010337_00411	GUT_GENOME093315_01780				GUT_GENOME096174_03562	GUT_GENOME141397_01100	GUT_GENOME244875_01525																	GUT_GENOME095377_00225	GUT_GENOME029683_00611
				GUT_GENOME098792_00093	GUT_GENOME044204_00719								GUT_GENOME218891_00832	GUT_GENOME244248_01336								GUT_GENOME094099_00733	GUT_GENOME115935_01903				GUT_GENOME101636_02414	GUT_GENOME225807_00332	GUT_GENOME243145_03225																	GUT_GENOME026742_01375	GUT_GENOME212224_01153
				GUT_GENOME237836_00422	GUT_GENOME265265_00879								GUT_GENOME075582_01478	GUT_GENOME096189_06051								GUT_GENOME233269_00037	GUT_GENOME123625_00655				GUT_GENOME215224_01769	GUT_GENOME140808_01221	GUT_GENOME087397_00096																	GUT_GENOME014081_01515	GUT_GENOME257123_00739
				GUT_GENOME096377_01931	GUT_GENOME172376_00431								GUT_GENOME281513_01029	GUT_GENOME118160_01441								GUT_GENOME258883_01954	GUT_GENOME096210_02424				GUT_GENOME125875_02207	GUT_GENOME103713_04084	GUT_GENOME145695_03749																	GUT_GENOME000573_00929	GUT_GENOME140605_01303
				GUT_GENOME001506_02783	GUT_GENOME096491_01979								GUT_GENOME124317_01242	GUT_GENOME017567_00526								GUT_GENOME143202_02160	GUT_GENOME001745_00347				GUT_GENOME000513_01774	GUT_GENOME000192_02260	GUT_GENOME140340_00422																	GUT_GENOME246096_00009	GUT_GENOME045758_00541
				GUT_GENOME120305_01337	GUT_GENOME207259_01376								GUT_GENOME281513_00773	GUT_GENOME231806_01481								GUT_GENOME000563_01358	GUT_GENOME143724_04834				GUT_GENOME000187_02826	GUT_GENOME000483_00397	GUT_GENOME074418_00055																	GUT_GENOME206098_01152	GUT_GENOME259948_01057
				GUT_GENOME020741_00544	GUT_GENOME157750_01880								GUT_GENOME275347_02094	GUT_GENOME140713_02415								GUT_GENOME163027_02380	GUT_GENOME255821_02147				GUT_GENOME270963_01630	GUT_GENOME283626_02348	GUT_GENOME018576_00758																	GUT_GENOME000203_00388	GUT_GENOME001115_00348
				GUT_GENOME138841_00363	GUT_GENOME096387_00010								GUT_GENOME096179_04171	GUT_GENOME130348_00357								GUT_GENOME269217_01195	GUT_GENOME096257_03067				GUT_GENOME096485_01353	GUT_GENOME107146_01217	GUT_GENOME141334_01145																	GUT_GENOME217902_00978	GUT_GENOME237426_01336
				GUT_GENOME118429_01028	GUT_GENOME095973_01088								GUT_GENOME262768_01113	GUT_GENOME143752_01941								GUT_GENOME109102_00076	GUT_GENOME125783_01045				GUT_GENOME096191_01371	GUT_GENOME110705_00584	GUT_GENOME236233_01337																	GUT_GENOME097975_01025	GUT_GENOME255174_00469
				GUT_GENOME233266_00955	GUT_GENOME001135_05095								GUT_GENOME000513_04040	GUT_GENOME115210_00535								GUT_GENOME000872_01858	GUT_GENOME000764_00174				GUT_GENOME239673_02148	GUT_GENOME258514_01331	GUT_GENOME232194_03297																	GUT_GENOME074354_01628	GUT_GENOME265665_00374
				GUT_GENOME000962_00914	GUT_GENOME000624_01408								GUT_GENOME256155_01650	GUT_GENOME117334_00331								GUT_GENOME259595_01271	GUT_GENOME096393_00262				GUT_GENOME094099_01547	GUT_GENOME231559_02118	GUT_GENOME128278_01097																	GUT_GENOME177471_00379	GUT_GENOME096196_02328
				GUT_GENOME129224_01825	GUT_GENOME140074_00610								GUT_GENOME103705_04597	GUT_GENOME145698_02466								GUT_GENOME232032_02988	GUT_GENOME263189_00883				GUT_GENOME142031_02241	GUT_GENOME124160_01160	GUT_GENOME100296_01644																	GUT_GENOME024283_00540	GUT_GENOME257394_02044
				GUT_GENOME141809_02348	GUT_GENOME143124_04630								GUT_GENOME153760_00881	GUT_GENOME193126_00786								GUT_GENOME105301_03165	GUT_GENOME103749_03793				GUT_GENOME205656_01566	GUT_GENOME254299_01736	GUT_GENOME096478_01092																	GUT_GENOME095982_03068	GUT_GENOME277672_02342
				GUT_GENOME096490_00398	GUT_GENOME014720_00726								GUT_GENOME014039_00033	GUT_GENOME058339_00356								GUT_GENOME231503_01491	GUT_GENOME069124_01078				GUT_GENOME133541_03136	GUT_GENOME111729_00268	GUT_GENOME096289_01078																	GUT_GENOME022861_01179	GUT_GENOME000367_02284
				GUT_GENOME185247_00284	GUT_GENOME119503_00407								GUT_GENOME261411_01979	GUT_GENOME146008_00952								GUT_GENOME141425_02250	GUT_GENOME284003_00689				GUT_GENOME000133_02202	GUT_GENOME147598_02052	GUT_GENOME098792_01414																	GUT_GENOME122482_00209	GUT_GENOME275803_00269
				GUT_GENOME247095_03414	GUT_GENOME096537_00354								GUT_GENOME018882_01975	GUT_GENOME000104_02886								GUT_GENOME096573_02024	GUT_GENOME108995_00145				GUT_GENOME024743_02088	GUT_GENOME247421_02151	GUT_GENOME096083_03041																	GUT_GENOME097137_00360	GUT_GENOME143724_00295
				GUT_GENOME207475_02488	GUT_GENOME000508_01548								GUT_GENOME000479_03241	GUT_GENOME096089_01125								GUT_GENOME105347_01915	GUT_GENOME096568_01602				GUT_GENOME234729_00781	GUT_GENOME142050_00377	GUT_GENOME096268_02147																	GUT_GENOME142687_00680	GUT_GENOME142391_02171
				GUT_GENOME096206_02730	GUT_GENOME017739_00089								GUT_GENOME144544_01155	GUT_GENOME147542_01190								GUT_GENOME002738_02363	GUT_GENOME002158_02156				GUT_GENOME201325_02005	GUT_GENOME237424_00315	GUT_GENOME231670_04243																	GUT_GENOME156655_01059	GUT_GENOME009762_01509
				GUT_GENOME000459_00023	GUT_GENOME000269_03913								GUT_GENOME038048_01780	GUT_GENOME143527_01027								GUT_GENOME096240_00330	GUT_GENOME239799_00180				GUT_GENOME143746_01378	GUT_GENOME096563_03371	GUT_GENOME153042_00448																	GUT_GENOME000677_01264	GUT_GENOME122083_00182
				GUT_GENOME078848_00550	GUT_GENOME250990_02644								GUT_GENOME140314_00221	GUT_GENOME096529_01854								GUT_GENOME103749_01187	GUT_GENOME189954_00372				GUT_GENOME096292_02966	GUT_GENOME230645_01052	GUT_GENOME199169_02275																	GUT_GENOME280822_00384	GUT_GENOME238996_01132
[truncated: 14,070 more rows]
[truncated: 10 more columns]
