# Supplementary material for: SIMMER employs similarity algorithms to accurately identify human gut microbiome species and enzymes capable of known chemical transformations
Source: eLife. 2023 Jun 12;12:e82401. doi: 10.7554/eLife.82401 (PMC10289814; doi:10.7554/eLife.82401)
Supplement: Figure 5—source data 1. [file elife-82401-fig5-data1.xlsx]

## Sheet: Figure 5
drug	microbial metabolite	microbial enzyme/gene	EC (literature)	SIMMER_rxn EC	Literature sequence found in top 20 reactions	Homologs found in top 20 reactions	Homologs found	Reaction rank	Reaction	Euclidean distance to reaction yielding positive control	Euclidean distance to farthest reaction	Normalized Euclidean distance	Reaction FPR
4-asa	N-acetyl-4-aminosalicylic acid	N-acetyltransferase	2.3.1.5	2.3.1	Yes	Yes	291	1	RXN-13871	0.806897	31.0813	0.0259608	0
5-asa (mesalazine)	N-acetyl-5-aminosalicylic acid	N-acetyltransferase	2.3.1.5	2.3.1	Yes	Yes	291	1	RXN-13871	0.662418	31.0408	0.0213402	0
5-fu	5-fluorodihydropyrimidine-2,4(1H,3H)-dione	PreTA	1.3.1.1	1.3.1	Yes	Yes	8	1	RXN-11209_f	0.480999	27.4201	0.0175418	0
balsalazide	5-aminosalicylic acid, 4-aminobenzoyl-beta-alanine	AzoR	1.7.1.6	1.5.1	No	No	693	98	RXN0-5375	4.13	20.5004	0.20146	1
brivudine	bromovinyluracil	BT_4554	2.4.2.2	no prediction	Yes	Yes	10	7	URPHOS-RXN_f	2.75688	28.4352	0.0969531	0.3
capecitabine	deglycocapecitabine	Thymidine phosphorylase/Uridine phosphorylase	2.4.2.-	2	Yes	Yes	56	5	URA-PHOSPH-RXN_f	2.66154	28.7301	0.0926395	0.2
clonazepam	nitroreduction	NfsB	1.5.1.34	1.1.1	Yes	Yes	414	6	RXN-13402	1.63801	26.9479	0.0607844	0.25
diclofenac glucuronide	diclofenac	Beta-glucuronidase	3.2.1.31	3.2.1	Yes	Yes	1	1	QUERCITRINASE-RXN	2.13041	29.1714	0.0730307	0
digoxin	dihydrodigoxin	Cgr2	1.3.2.-	1.5.98	Yes	Yes	2	6	RXN-12224_f	2.61763	28.0816	0.0932153	0.25
diltiazem	desacetylditiazem	BT_4096	-	3.1.1	Yes	Yes	48	5	RXN-12252	2.43872	29.7594	0.0819478	0.2
dopamine	m-tyramine	DadhR506	1.1.-.-	1	Yes	Yes	94	1	RXN-21082	0	30.7622	0	0
doxifluridine	5-fu	Thymidine phosphorylase/Uridine phosphorylase	2.4.2.-	2.4.2	Yes	Yes	56	1	URPHOS-RXN_f	1.59586	29.0398	0.0549544	0
ezetimib glucuronide	ezetimib	Beta-glucuronidase	3.2.1.31	3.2.1	Yes	Yes	1	5	RXN-14478	2.27452	29.3704	0.0774426	0.2
flunitrazepam	nitroreduction	NfsB	1.5.1.34	1.14.13	Yes	Yes	414	4	1.14.13.101-RXN	1.66481	26.6681	0.0624272	0.15
gemcitabine	2′, 2′-difluorodeoxyuridine	Cytidine deaminase	3.5.4.5	3.5.4	Yes	Yes	112	1	CYTIDEAM-RXN	0.609587	30.4075	0.0200473	0
hydrocortisone (cortisol)	20A-dihydrocortisone	20A-HSDH	1.1.1.1	1.1.1	Yes	Yes	1541	1	RXN-15357_f	0	25.9736	0	0
hydrocortisone (cortisol)	20B-dihydrocortisone	20B-HSDH	1.-	1.1.1	Yes	Yes	21330	3	RXN-15607	0.866643	25.9736	0.0333662	0.1
indomethacin glucuronide	indomethacin	Beta-glucuronidase	3.2.1.31	3.2.1	Yes	Yes	1	3	QUERCITRINASE-RXN	2.24359	29.2028	0.076828	0.1
ketoprofen glucuronide	ketoprofen	Beta-glucuronidase	3.2.1.31	3.2.1	Yes	Yes	1	1	QUERCITRINASE-RXN	1.98227	29.4744	0.0672541	0
levodopa	dopamine	TyrDC	4.1.1.25	4.1.1	Yes	Yes	25	1	TYROSINE-DECARBOXYLASE-RXN	1.35355	30.259	0.0447319	0
morphine 6-glucuronide	morphine	Beta-glucuronidase	3.2.1.31	3.2.1	Yes	Yes	1	10	3.2.1.92-RXN	2.27709	29.0491	0.0783878	0.45
mycophenolate-glucuronide	mycophenolic acid	Beta-glucuronidase	3.2.1.31	3	Yes	NA	NA	9	QUERCITRINASE-RXN	2.44705	29.5455	0.0828229	0.4
nicardipine	aminonicardipine	AzoR	1.5.1.34	5.4.99	Yes	Yes	2	1	RXN-18509	2.18228	29.268	0.0745619	0
nitrazepam	7-aminonitrazepam	NfsB	1.5.1.34	1.1.1	Yes	Yes	414	10	RXN-13476	1.61823	27.5335	0.0587732	0.45
olsalazine	5-asa	AzoR	1.7.1.6	1.7.1	Yes	Yes	693	1	RXN0-5375	1.95471	21.9814	0.0889258	0
pericyazine	acetylpericyazine	BT_2367	-	2.3.1	No	No	312	177	RXN-21324	3.29194	30.2278	0.108904	1
pericyazine	propionylpericyazine	BT_2367	-	2.3.1	No	No	312	90	RXN-7743	2.68835	30.2278	0.0889361	1
prontosil	triaminobenzene, sulphanilamide	AzoR	1.7.1.6	1.7.1	Yes	Yes	693	1	RXN0-5375	1.19	22.58	0.0527015	0
regorafenib-glucuronide	regorafenib	WP_118581144.1, WP_118096903.1, CBJ55484.1, CBK98066.1	3.2.1.31	3	Yes	NA	NA	2	RXN-15289	2.16741	29.4441	0.073611	0.05
SN38-G	SN-38	Beta-glucuronidase	3.2.1.31	3.2.1	Yes	Yes	1	3	RXN-14478	2.59231	28.5883	0.0906774	0.1
sorivudine	bromovinyluracil	BT_4554	2.4.2.2	2.4.2	Yes	Yes	10	4	URPHOS-RXN_f	2.73187	28.2077	0.0968482	0.15
sulfasalazine	sulfapyridine, 5-ASA	AzoR, BT_0217, BT_1429	1.7.1.6	1.5.1	No	No	2	82	RXN-18509	3.02404	30.5483	0.0989922	1
trifluridine	trifluorothymine	Thymidine phosphorylase/Uridine phosphorylase	2.4.2.-	2.4.2	Yes	Yes	56	1	URA-PHOSPH-RXN_f	1.29207	29.2748	0.0441359	0
					0.878788				median	2.13041	29.1714	0.073611	0.1

## Sheet: Figure 5-figure supplement 1
positive control reaction	hydrocortisone -> 20A-dihydrocortisone	hydrocortisone -> 20A-dihydrocortisone	hydrocortisone -> 20A-dihydrocortisone	hydrocortisone -> 20B-dihydrocortisone	hydrocortisone -> 20B-dihydrocortisone	hydrocortisone -> 20B-dihydrocortisone	balsalazide	balsalazide	balsalazide	olsalazine	olsalazine	olsalazine	prontosil	prontosil	prontosil	nicardipine	nicardipine	nicardipine	sulfasalazine	sulfasalazine	sulfasalazine	ezetimib glucuronide	ezetimib glucuronide	ezetimib glucuronide	diclofenac glucuronide	diclofenac glucuronide	diclofenac glucuronide	indomethacin glucuronide	indomethacin glucuronide	indomethacin glucuronide	ketoprofen glucuronide	ketoprofen glucuronide	ketoprofen glucuronide	morphine 6-glucuronide	morphine 6-glucuronide	morphine 6-glucuronide	SN38-G	SN38-G	SN38-G	diltiazem	diltiazem	diltiazem	pericyazine acetylation	pericyazine acetylation	pericyazine acetylation	pericyazine propionylation	pericyazine propionylation	pericyazine propionylation	digoxin
SIMMER output	reaction	Euclidean distance	EC class	reaction	Euclidean distance	EC class	reaction	Euclidean distance	EC class	reaction	Euclidean distance	EC class	reaction	Euclidean distance	EC class	reaction	Euclidean distance	EC class	reaction	Euclidean distance	EC class	reaction	Euclidean distance	EC class	reaction	Euclidean distance	EC class	reaction	Euclidean distance	EC class	reaction	Euclidean distance	EC class	reaction	Euclidean distance	EC class	reaction	Euclidean distance	EC class	reaction	Euclidean distance	EC class	reaction	Euclidean distance	EC class	reaction	Euclidean distance	EC class	reaction
	RXN-15357_f	0	NIL	RXN-15357_f	0	NIL	RXN-13909	2.07294	1	RXN0-5375	1.95471	1	RXN0-5375	1.19203	1	RXN-18509	2.18228	NIL	2.1.1.90-RXN	2.26074	2	RXN-9162	1.92872	NIL	QUERCITRINASE-RXN	2.13041	3	RXN-21244	2.03516	NIL	QUERCITRINASE-RXN	1.98227	3	RAUCAFFRICINE-BETA-GLUCOSIDASE-RXN	1.53756	3	RXN-12265	2.25334	3	3.1.1.78-RXN	2.21102	3	2.3.1.175-RXN	1.46996	2	RXN-18367	1.90534	2	RXN-11080
	RXN-15357_r	0	NIL	RXN-15357_r	0	NIL	RXN-17360	2.34806	NIL	RXN-17360	2.20928	NIL	1.5.1.15-RXN	1.92321	1	RXN-19154	2.34068	NIL	RXN-10056	2.40091	3	RXN-18857	2.03437	3	RXN-13137	2.22789	3	RXN-11469	2.07351	3	RXN-13610	2.02239	3	STRICTOSIDINE-BETA-GLUCOSIDASE-RXN	1.83498	3	RXN-17438	2.57635	NIL	RXN-11192	2.27048	3	RXN-19971	1.52838	NIL	RXN-21226_f	2.00125	2	RXN-15614_f
	RXN-15607	0.866643	NIL	RXN-15607	0.866643	NIL	RXN-18357	2.4249	1	RXN-15454	2.38044	1	RXN-11511	1.95787	1	RXN0-743	2.34142	5	PROTOHEMEFERROCHELAT-RXN_f	2.41342	4	STRICTOSIDINE-BETA-GLUCOSIDASE-RXN	2.1873	3	2.3.1.91-RXN	2.26646	2	QUERCITRINASE-RXN	2.24359	3	RXN-11469	2.08288	3	RXN-13791	1.86212	NIL	RXN-14478	2.59231	NIL	RXN-16588	2.37218	NIL	CHLORAMPHENICOL-O-ACETYLTRANSFERASE-RXN	1.60571	2	RXN-21226_r	2.00125	2	RXN-15614_r
	1.1.1.149-RXN_f	1.31754	1	1.1.1.149-RXN_f	1.31754	1	RXN-19186	2.63764	NIL	RXN-16775	2.43438	1	RXN-17359	1.99815	1	RXN-18342	2.34303	NIL	PROTOHEMEFERROCHELAT-RXN_r	2.41342	4	RXN-14436	2.21445	NIL	RXN-21244	2.28672	NIL	2.3.1.91-RXN	2.27503	2	RXN-14179	2.13421	3	RXN-16511	2.01599	NIL	HEMEOSYN-RXN	2.60441	2	RXN-18105	2.41136	NIL	2.3.1.162-RXN_f	1.62461	2	3-HYDROXYISOBUTYRYL-COA-HYDROLASE-RXN	2.20177	3	RXN-17063
	1.1.1.149-RXN_r	1.31754	1	1.1.1.149-RXN_r	1.31754	1	RXN-2883_f	2.7081	NIL	RXN-11511	2.489	1	R606-RXN	2.0386	NIL	RXN-16743	2.46758	NIL	3.8.1.7-RXN	2.41651	3	RXN-13791	2.24182	NIL	RXN-13610	2.3131	3	RXN-10860_f	2.31998	NIL	VICIANIN-BETA-GLUCOSIDASE-RXN	2.13453	3	RXN-18857	2.05374	3	RXN-17447	2.60716	NIL	RXN-12252	2.43872	3	2.3.1.162-RXN_r	1.62461	2	RXN-13721	2.20177	3	METHELENE-THMPT-OXI-RXN_f
	RXN-9484	1.76347	1	RXN-9484	1.76347	1	RXN-2883_r	2.7081	NIL	1.5.1.15-RXN	2.55587	1	RXN-11186	2.17284	1	RXN-14858	2.49595	NIL	RXN-11783	2.44343	1	RXN-21244	2.27457	NIL	RXN-11469	2.32279	3	RXN-10860_r	2.31998	NIL	2.3.1.91-RXN	2.15538	2	RXN-16484	2.09663	3	2.5.1.32-RXN	2.61844	NIL	RXN-9485	2.45561	4	2.3.1.67-RXN	1.65605	2	RXN-16012	2.22392	NIL	METHELENE-THMPT-OXI-RXN_r
	RXN-9483	1.76347	1	RXN-9483	1.76347	1	RXN-16774_f	2.77297	1	RXN-16583	2.58529	NIL	RXN-16583	2.34771	NIL	THIAMINASE-RXN	2.50101	3	RXN-14910	2.44985	3	RXN-16249	2.42581	3	VICIANIN-BETA-GLUCOSIDASE-RXN	2.35168	3	2.3.1.92-RXN	2.34552	2	RXN-10769	2.19757	3	RXN-16512_f	2.23873	3	RXN-11112	2.62137	3	RXN-20733	2.49069	3	RXN-9449	1.65891	NIL	RXN-8694	2.24235	2	RXN-17064
	TESTOSTERONE-17-BETA-DEHYDROGENASE-RXN	1.85975	1	TESTOSTERONE-17-BETA-DEHYDROGENASE-RXN	1.85975	1	RXN-16774_r	2.77297	1	RXN-11740	2.61917	1	FORMYLTETRAHYDROFOLATE-DEHYDROGENASE-RXN_f	2.5241	1	RXN-12159	2.5054	NIL	RXN-10785	2.45716	4	RXN-13970	2.42693	2	RXN-14179	2.38204	3	RAUCAFFRICINE-BETA-GLUCOSIDASE-RXN	2.42817	3	RXN-8036	2.26397	3	RXN-16512_r	2.23873	3	RXN-17442	2.6303	NIL	RXN-17045	2.50839	NIL	RXN-17070	1.71066	NIL	RXN-18333	2.34054	NIL	RXN-12224_f
	RXN-15466	1.98937	NIL	RXN-15466	1.98937	NIL	RXN-8568	2.79633	1	RXN-17359	2.67812	1	FORMYLTETRAHYDROFOLATE-DEHYDROGENASE-RXN_r	2.5241	1	RXN-19051	2.54855	4	RXN-17518	2.46624	4	PRIBFAICARPISOM-RXN	2.43232	5	CHLOROGENATE-HYDROLASE-RXN	2.39641	3	RXN-18857	2.4779	3	RXN-13137	2.29403	3	RXN-12177	2.23873	3	GLYCOSYLCERAMIDASE-RXN	2.68604	3	RXN-17053	2.50976	NIL	RXN-17035	1.71894	NIL	RXN-18668	2.39263	2	RXN-12224_r
	RXN66-350_f	2.03399	1	RXN66-350_f	2.03399	1	RXN-7665	2.79961	NIL	R606-RXN	2.73048	NIL	RXN-11740	2.61245	1	RXN0-5409	2.55398	NIL	RXN-10058	2.4671	3	RXN-11469	2.46956	3	RXN-10769	2.45926	3	STRICTOSIDINE-BETA-GLUCOSIDASE-RXN	2.49559	3	2.3.1.92-RXN	2.37821	2	3.2.1.92-RXN	2.27709	3	RXN-20645	2.70955	2	CEPHALOSPORIN-C-DEACETYLASE-RXN	2.52353	3	RXN-17039	1.76954	NIL	PTAALT-RXN_f	2.41737	2	RXN-8106
	RXN66-350_r	2.03399	1	RXN66-350_r	2.03399	1	RXN-14019	2.83365	NIL	RXN1F-72	2.79107	1	RXN-15454	2.65492	1	MIMOSINASE-RXN	2.5793	3	RXN-16459	2.5246	NIL	RAUCAFFRICINE-BETA-GLUCOSIDASE-RXN	2.48383	3	RXN-10860_f	2.46937	NIL	RXN-18071	2.5148	NIL	CHLOROGENATE-HYDROLASE-RXN	2.39706	3	RXN0-5226	2.33206	3	PRIBFAICARPISOM-RXN	2.73147	5	RXN-8222	2.52925	3	RXN-17037	1.77063	NIL	PTAALT-RXN_r	2.41737	2	RXN-15963
	RXN-9290	2.0812	1	RXN-9290	2.0812	1	RXN-21292	2.83512	1	RXN-11186	2.7932	1	RXN-17360	2.70035	NIL	RXN-19972	2.60932	NIL	RXN-13973	2.53515	2	RXN-14478	2.51712	NIL	RXN-10860_r	2.46937	NIL	2.3.1.103-RXN	2.5632	2	RXN-10860_f	2.42295	NIL	RXN-16509	2.37298	3	RXNARA-8002	2.74466	NIL	RXN-9488	2.53078	3	RXN-15080	1.80172	NIL	2-METHYLCITRATE-SYNTHASE-RXN_f	2.4672	2	RXN-15967
	1.1.1.51-RXN	2.14321	1	1.1.1.51-RXN	2.14321	1	BADEL6OXRED-RXN	2.87249	1	RXN-16774_f	2.96411	1	METHYLENETHFDEHYDROG-NADP-RXN_f	2.71047	1	THIAMIN-PYRIDINYLASE-RXN	2.64893	2	RXN-18848	2.54516	NIL	2.3.1.103-RXN	2.52292	2	RXN-8036	2.48138	3	RXN-13791	2.61207	NIL	RXN-10860_r	2.42295	NIL	RXN-16510	2.38093	NIL	RXN-8357	2.78089	3	RXN-8220	2.55387	3	RXN-16591	1.80822	NIL	2-METHYLCITRATE-SYNTHASE-RXN_r	2.4672	2	RXN-20303
	RXN-15467	2.1918	NIL	RXN-15467	2.1918	NIL	RXN-16438_f	2.90513	NIL	RXN-16774_r	2.96411	1	METHYLENETHFDEHYDROG-NADP-RXN_r	2.71047	1	RXN-14263	2.65801	3	BLASTICIDIN-S-DEAMINASE-RXN_f	2.55923	3	RXN-13967	2.57773	2	2.3.1.103-RXN	2.49894	2	RXN-13610	2.62437	3	RXN-9588	2.43215	NIL	RXN-13694	2.41906	3	RXN-9995	2.79808	2	RXN-17046	2.56238	NIL	RXN-15669	1.82414	NIL	KETOBUTFORMLY-RXN	2.47453	NIL	1.1.3.34-RXN
	RXN66-353_f	2.2044	1	RXN66-353_f	2.2044	1	RXN-16438_r	2.90513	NIL	RXN-11053	2.97461	1	RXNMETA-12672	2.72918	1	RXN-8635	2.68878	1	BLASTICIDIN-S-DEAMINASE-RXN_r	2.55923	3	RXN-13610	2.5787	3	RXN-9588	2.53454	NIL	PRIBFAICARPISOM-RXN	2.65878	5	RXN-13694	2.58297	3	RXN-11469	2.46916	3	RXN-15681	2.81222	NIL	RXN-15749	2.5709	NIL	RXN-11752_f	1.83905	NIL	RXN-21228	2.48239	2	RXN-15960
	RXN66-353_r	2.2044	1	RXN66-353_r	2.2044	1	RXN-7678	2.93619	1	RXNMETA-12672	2.98253	1	RXN-15027	2.76957	NIL	RXN-13907	2.70181	1	RIBOFLAVINSYNDEAM-RXN	2.61347	3	RXN-14837	2.59019	2	2.3.1.92-RXN	2.58392	2	RXN-13694	2.67087	3	RAUCAFFRICINE-BETA-GLUCOSIDASE-RXN	2.61042	3	RXN-14021	2.48384	3	2.5.1.42-RXN	2.81942	2	RXN-8255	2.59001	NIL	RXN-11752_r	1.83905	NIL	RXN-20431	2.52134	NIL	RXN-15968
	RXN-15464	2.27333	NIL	RXN-15464	2.27333	NIL	RXN-2401	2.95983	1	FORMYLTETRAHYDROFOLATE-DEHYDROGENASE-RXN_f	2.99052	1	RXN-16775	2.79633	1	RXN-16912	2.70665	NIL	RXN-16312	2.63084	1	2.3.1.91-RXN	2.60393	2	RXN-13694	2.60381	3	VICIANIN-BETA-GLUCOSIDASE-RXN	2.67286	3	RXN-21244	2.63323	NIL	RXN-13137	2.52382	3	RXN-12686	2.81988	3	RXN-12583	2.6302	NIL	RXN-11366	1.85667	2	RXN-12573	2.54631	4	RXN-12258
	RXN-15367	2.32348	1	RXN-15367	2.32348	1	RXN-14018	2.96712	NIL	FORMYLTETRAHYDROFOLATE-DEHYDROGENASE-RXN_r	2.99052	1	RXN-11053	2.88353	1	RXN-20733	2.71286	3	RXN-18936	2.66313	3	RXN-10860_f	2.64713	NIL	2.3.1.98-RXN	2.6401	2	RXN-14179	2.67811	3	2.3.1.103-RXN	2.64939	2	3.2.1.129-RXN	2.5468	3	RXN-16938	2.85784	3	RXN-15820	2.66156	NIL	RXN-12806	1.85765	2	RXN-12561_f	2.54665	2	RXN-9305
	RXN-15465	2.38645	NIL	RXN-15465	2.38645	NIL	RXN-15454	2.9717	1	RXN-17005	3.0538	NIL	RXN-12940	2.92471	NIL	RXN-17842	2.73556	NIL	RXN-19328	2.66642	3	RXN-10860_r	2.64713	NIL	RXN-17079	2.64644	NIL	CHLOROGENATE-HYDROLASE-RXN	2.6946	3	STRICTOSIDINE-BETA-GLUCOSIDASE-RXN	2.75637	3	RXN-12178	2.55507	3	2.1.1.131-RXN	2.85894	2	RXN-17435	2.70445	4	RXN-14735	1.85765	NIL	RXN-12561_r	2.54665	2	RXN-13626
	RXN-11472_f	2.39343	1	RXN-11472_f	2.39343	1	RXN-9276	2.99572	1	RXN-17424	3.09002	1	RXN-17005	2.94259	NIL	3.3.2.2-RXN	2.73766	3	RXN-12159	2.66659	NIL	RXN-15289	2.66507	3	RXN-16250	2.73199	3	RXN-16937	2.70724	2	RXN-19769	2.80573	3	RXN-16485	2.55507	3	RXN-16649	2.87608	3	RXN-17042	2.70839	NIL	RXN-19905	1.87355	2	2.3.1.58-RXN	2.58088	2	RXN-19230
	RXN-11472_r	2.39343	1	RXN-11472_r	2.39343	1	RXN-15799	2.99765	1	RXN-8787	3.09418	1	1.14.13.58-RXN	2.9911	1	BLASTICIDIN-S-DEAMINASE-RXN_f	2.73971	3	RXN-16912	2.68718	NIL	RXN-14432	2.6697	2	RXN-12404	2.73538	NIL	RXN-9162	2.74416	NIL	RXN-18763	2.81875	3	QUERCITRINASE-RXN	2.56905	3	RXN-15635	2.8761	2	RXN-8073	2.7165	NIL	RXN-17052	1.88632	NIL	RXN-20219	2.60723	2	RXN-11104
	RXN-11471_f	2.39343	1	RXN-11471_f	2.39343	1	RETINAL-DEHYDROGENASE-RXN	2.99968	1	1.14.13.58-RXN	3.0951	1	RXN-10646	3.00326	NIL	BLASTICIDIN-S-DEAMINASE-RXN_r	2.73971	3	RXN-13364	2.68812	1	3.2.1.129-RXN	2.68525	3	2.3.1.72-RXN	2.75524	2	RXN-14436	2.79947	NIL	RXN-12404	2.83626	NIL	RXN-18072	2.60676	NIL	RXN-17832	2.88817	3	RXN-11981	2.72247	NIL	RXN-18624	1.89842	2	RETINOL-O-FATTY-ACYLTRANSFERASE-RXN_f	2.64012	2	RXN-17144
	RXN-11471_r	2.39343	1	RXN-11471_r	2.39343	1	RXN1F-72	3.00781	1	RXN-15027	3.1517	NIL	RXN1F-72	3.02985	1	RXN-8746	2.74357	3	RXN-19838	2.71517	4	VICIANIN-BETA-GLUCOSIDASE-RXN	2.73819	3	RAUCAFFRICINE-BETA-GLUCOSIDASE-RXN	2.77419	3	RXN-17079	2.83136	NIL	RXN-16250	2.83755	3	AMYGDALIN-BETA-GLUCOSIDASE-RXN	2.60686	3	RXN-2882	2.88864	4	RXN-10895	2.74967	NIL	2.3.1.167-RXN	1.94981	2	RETINOL-O-FATTY-ACYLTRANSFERASE-RXN_r	2.64012	2	RXN-10842
	RXN-14245	2.39525	1	RXN-14245	2.39525	1	RXN-16441_f	3.03049	NIL	RXNQT-4338	3.15669	1	RXN-17006	3.04988	NIL	SINAPINE-ESTERASE-RXN	2.7495	3	RXN-19841	2.71517	NIL	RXN-21331	2.74627	NIL	RXN-15289	2.85628	3	RXN-10769	2.8356	3	RXN-14546	2.86338	2	RXN-13610	2.66809	3	RXN-8081	2.89904	6	KIEVITONE-HYDRATASE-RXN	2.7624	4	RXN-9939	1.95894	2	RXN-11749	2.64334	3	RXN-8771
	RXN-15601	2.44083	NIL	RXN-15601	2.44083	NIL	RXN-16441_r	3.03049	NIL	RXN-18213	3.15669	1	RXNQT-4338	3.05269	1	RXN-11753_f	2.76206	NIL	3.4.23.38-RXN	2.71746	3	RXN-13694	2.75582	3	RXN-5822	2.85712	3	RXN-13137	2.84039	3	RXN-17079	2.87019	NIL	VICIANIN-BETA-GLUCOSIDASE-RXN	2.67128	3	GLUTAMIDOTRANS-RXN	2.91454	4	RXN-10896	2.76606	NIL	RXN-16090	1.98028	NIL	RXN-7938	2.67442	3	RXN-9303
	RXN-17409	2.47647	1	RXN-17409	2.47647	1	RXN-8796	3.03563	NIL	RXNQT-4336	3.15669	1	RXN-18213	3.05269	1	RXN-11753_r	2.76206	NIL	3.4.23.39-RXN	2.71746	3	RXN-19356	2.77397	NIL	RXN-18068	2.86674	NIL	RXN-13970	2.85842	2	RXN-15289	2.87503	3	RXN1QP9-73	2.69442	NIL	RXN-20710	2.93281	6	SINAPINE-ESTERASE-RXN	2.79236	3	GLUCOSAMINEPNACETYLTRANS-RXN	2.01504	2	METHYLACETOACETYLCOATHIOL-RXN_f	2.67911	2	RXN-9304
	MANNPDEHYDROG-RXN_f	2.48025	1	MANNPDEHYDROG-RXN_f	2.48025	1	RXN-8794	3.04109	NIL	RXN-18357	3.18848	1	RXNQT-4336	3.05269	1	NICOTINE-DEHYDROGENASE-RXN	2.77179	1	RXN-17156	2.72218	NIL	2.3.1.92-RXN	2.81505	2	RXN-13211	2.88214	NIL	RXN-12404	2.8631	NIL	RXN-8454	2.87752	1	RXN-16249	2.69559	3	RXN-9385	2.94782	NIL	RXN-14865	2.79774	3	2.3.1.150-RXN	2.02612	2	METHYLACETOACETYLCOATHIOL-RXN_r	2.67911	2	RXN-17128
	MANNPDEHYDROG-RXN_r	2.48025	1	MANNPDEHYDROG-RXN_r	2.48025	1	RXN-15029	3.04385	NIL	RXN-10057	3.19311	1	RXN-16930	3.08733	NIL	RXN-16459	2.78287	NIL	RXN-18342	2.74247	NIL	RXN-19814	2.81586	3	RXN-19769	2.89966	3	RXN-14478	2.86809	NIL	RXN-12024	2.89803	3	RXN-18071	2.70278	NIL	RXN-18273	2.95022	NIL	RXN-12115	2.79944	1	RXN-9244	2.03109	2	RXN-10986	2.70418	NIL	RXN-17996
	1.1.1.285-RXN	2.48212	1	1.1.1.285-RXN	2.48212	1	RXN-19796	3.0554	NIL	RXN-13084	3.19568	NIL	RXN-8787	3.08927	1	RXN-14910	2.81995	3	RXN-13355	2.7515	1	RXN-12324_f	2.83262	NIL	RXN-8677	2.91909	NIL	RXN-15289	2.88918	3	RXN0-6427	2.91812	3	RXN-21244	2.71501	NIL	RXN-21331	2.95033	NIL	RXN-7984	2.80923	NIL	2.3.1.107-RXN	2.03815	2	RXN-17041	2.70904	NIL	RXN-20244
	RXN-17396_f	2.50002	1	RXN-17396_f	2.50002	1	RXN-8795	3.06915	NIL	RXN-18464	3.207	NIL	RXN-18464	3.09349	NIL	RXN-16056	2.82829	NIL	CYTIDEAM-RXN	2.7703	3	RXN-12324_r	2.83262	NIL	PRUNASIN-BETA-GLUCOSIDASE-RXN	2.92784	3	RXN-18068	2.90583	NIL	RXN-5822	2.92336	3	2.3.1.91-RXN	2.74819	2	RXN-17900	2.95325	NIL	RXN-7985	2.81585	NIL	TDPFUCACTRANS-RXN	2.0538	2	RXN-18369	2.7503	2	RXN-14684
	RXN-17396_r	2.50002	1	RXN-17396_r	2.50002	1	RXN-20779	3.12745	NIL	RXN-17420_f	3.21821	1	RXN-11998	3.10254	1	RXN-12609	2.8285	5	RXN-19129	2.77334	1	RXN-18071	2.84553	NIL	STRICTOSIDINE-BETA-GLUCOSIDASE-RXN	2.93389	3	RXN-14021	2.92732	3	PRUNASIN-BETA-GLUCOSIDASE-RXN	2.92394	3	RXN0-7002	2.75456	3	RXN-15680	2.95507	2	RXN-8144	2.82326	4	RXN-13755	2.0538	2	RXN-13098	2.7588	NIL	RXN-18831
	R218-RXN	2.50513	NIL	R218-RXN	2.50513	NIL	RXN-16775	3.14852	1	RXN-17420_r	3.21821	1	RXN-16455	3.11216	NIL	FORMYLTHFDEFORMYL-RXN	2.87981	3	OHMETHYLBILANESYN-RXN	2.77358	2	RXN0-4181	2.84723	3	RXN-18763	2.95689	3	RXN-5822	2.92785	3	RXN-14640	2.9437	3	RXN-16487	2.83873	NIL	RXN-19314	2.95862	3	RXN-16344	2.8246	1	RXN-9192	2.05832	2	RXN-7697	2.77563	2	1.5.99.9-RXN_f
	RXN-16215	2.53095	NIL	RXN-16215	2.53095	NIL	RXN-16929	3.15249	NIL	RXN-5283	3.2322	NIL	RXN-15495	3.11525	NIL	RXN-17435	2.88337	4	RXN-10642	2.7859	4	RXN-13211	2.85339	NIL	RXN0-6427	2.97282	3	RXN-19814	2.93501	3	RXN-18857	2.94661	3	RXN-9162	2.84986	NIL	RXN-21213	2.96824	NIL	RXN-16093	2.82774	NIL	2.3.1.45-RXN_f	2.06278	2	RXN-6384	2.77838	3	1.5.99.9-RXN_r
	RXN-3341	2.54272	1	RXN-3341	2.54272	1	RXN-15514	3.18706	1	RXN-12940	3.24796	NIL	RXN-15496	3.12742	NIL	RXN-8073	2.8873	NIL	RXN0-5409	2.79457	NIL	RXN-11802	2.85903	2	RXN-21033	2.97573	NIL	RXN-18763	2.94681	3	RXN-10846	2.96217	4	RXN-11569	2.88388	3	RXN-12745	2.97324	NIL	RXN-15028	2.83239	NIL	2.3.1.45-RXN_r	2.06278	2	CARNITINE-O-OCTANOYLTRANSFERASE-RXN	2.80433	2	RXN-14204_f
	RXN-16216	2.59047	NIL	RXN-16216	2.59047	NIL	RXN0-2042	3.19261	1	METHYLENETHFDEHYDROG-NADP-RXN_f	3.2643	1	RXN-15229	3.12866	NIL	ARYLDIALKYL-PHOSPHATASE-RXN	2.88816	3	RXN-12393	2.80989	1	RXN-12230	2.92461	2	RXN-14021	2.98061	3	RXN-21033	2.9525	NIL	RXN-14436	2.97056	NIL	2.3.1.92-RXN	2.88771	2	RXN-19315	2.99212	3	RXN-16922	2.83895	NIL	DIHYDLIPACETRANS-RXN	2.14384	2	RXN-14277	2.80889	2	RXN-14204_r
	RXN-16656	2.61953	1	RXN-16656	2.61953	1	RXN-20995	3.19357	1	METHYLENETHFDEHYDROG-NADP-RXN_r	3.2643	1	RXN-16928	3.13848	NIL	RXN-8217	2.89088	NIL	RXN-10035	2.81892	3	RXN-18068	2.99848	NIL	RXN-18378	2.99514	4	RXN-16249	2.96255	3	RXN-15749	2.98061	NIL	RXN-13211	2.95692	NIL	MTDMBARK-RXN_f	3.02523	1	RXN-3625	2.84073	NIL	RXN-12232	2.1687	NIL	RXN-8947	2.81966	2	RXN-14988
	UGD-RXN	2.62332	1	UGD-RXN	2.62332	1	RXN-15543	3.22945	1	RXN-11081	3.27079	1	RXN-13084	3.14104	NIL	3.1.1.54-RXN	2.89194	3	RXN-20725	2.83013	3	QUERCITRINASE-RXN	3.0015	3	RXN-12024	3.0053	3	RXN0-4181	2.97289	3	RXN-21073	2.9832	NIL	RXN-13603	2.972	3	MTDMBARK-RXN_r	3.02523	1	RXN-13907	2.84691	1	RXN-7864_f	2.17007	2	RXN-14394	2.82436	2	RXN-11664
	1.5.1.28-RXN_f	2.62384	1	1.5.1.28-RXN_f	2.62384	1	RXNQT-4337	3.23331	1	RXN-16587	3.30492	NIL	RXN-17424	3.15232	1	1.2.3.14-RXN	2.89348	1	RXN-16457	2.83342	NIL	STREPTOMYCIN-3-ADENYLYLTRANSFERASE-RXN	3.00651	2	PPGPPSYN-RXN	3.02713	3	RXNQT-4359	2.98262	3	RXN-13791	2.98617	NIL	RXN-14179	3.01138	3	RXN-14400	3.0474	2	LIGNOSTILBENE-ALPHA-BETA-DIOXYGENASE-RXN	2.85239	1	RXN-7864_r	2.17007	2	RXN-17799	2.82436	2	RXN-16536
	1.5.1.28-RXN_r	2.62384	1	1.5.1.28-RXN_r	2.62384	1	RXN-9087	3.23656	1	RXN-16537	3.30631	NIL	1.1.1.288-RXN	3.15775	1	RXN-14546	2.8974	2	RXN-21220	2.83566	3	RXN0-6254	3.00678	2	RXN-13696	3.03074	3	RXN-13211	2.98354	NIL	RXN-8677	2.99264	NIL	RXN-9588	3.02437	NIL	R346-RXN	3.06463	3	RXN-14858	2.86548	NIL	RXN-19880	2.17614	2	RXN18C3-25	2.82871	NIL	RXN-14990
	6PGLUCONDEHYDROG-RXN	2.62791	1	6PGLUCONDEHYDROG-RXN	2.62791	1	RIBOFLAVINSYNREDUC-RXN	3.23912	1	RXN-15496	3.33819	NIL	RXN-16537	3.16008	NIL	GART-RXN_f	2.89908	2	3.4.22.40-RXN	2.83566	3	RXN-12404	3.01351	NIL	RXN-14546	3.04173	2	2.3.1.98-RXN	2.99557	2	RXN-16483	2.994	3	RXN-11461	3.02979	4	RXN-21171	3.06682	NIL	RXN-17138	2.86642	1	2.3.1.157-RXN	2.17614	2	RXN-8927	2.83028	NIL	RXN-19641
	OMEGA-HYDROXYDECANOATE-DEHYDROGENASE-RXN_f	2.65591	1	OMEGA-HYDROXYDECANOATE-DEHYDROGENASE-RXN_f	2.65591	1	RXN-11740	3.24795	1	RXN-17006	3.34797	NIL	RXN-16587	3.16656	NIL	GART-RXN_r	2.89908	2	RXN-21219	2.83566	3	RXN-15734	3.01706	2	RXN-16937	3.04948	2	RXN-18661	2.99678	2	RXN-13211	2.99584	NIL	RXN-14436	3.05624	NIL	RXN0-1842	3.08652	2	1.14.20.1-RXN	2.86676	1	RXN-10000	2.20405	2	RXN-11	2.8444	2	GLUTAMIDOTRANS-RXN
	OMEGA-HYDROXYDECANOATE-DEHYDROGENASE-RXN_r	2.65591	1	OMEGA-HYDROXYDECANOATE-DEHYDROGENASE-RXN_r	2.65591	1	RXN-17420_f	3.24984	1	RXN-13909	3.35929	1	RXN-17421	3.18199	NIL	RXN-10913	2.89962	1	ARYLFORMAMIDASE-RXN	2.83877	3	RXN-19641	3.0235	4	RXN-16484	3.07542	3	RXN-14640	3.00056	3	PPGPPSYN-RXN	3.00552	3	RXN-10860_f	3.07533	NIL	RXN-19641	3.08765	4	RXN-14863	2.87345	3	RXN-13253	2.20405	2	RXN-13322	2.88752	2	RXN-17900
	RXN-11928	2.6697	1	RXN-11928	2.6697	1	RXN-17420_r	3.24984	1	RXN-17969	3.38971	1	RXN-9971	3.19226	1	NMNAMIDOHYDRO-RXN	2.91809	3	4-ACETAMIDOBUTYRYL-COA-DEACETYLASE-RXN	2.84719	3	RXN-11461	3.03243	4	RXN-8342	3.07724	2	RXN-12324_f	3.01417	NIL	RXN-8763	3.01195	3	RXN-10860_r	3.07533	NIL	RXN-12430	3.10115	3	RXN-14546	2.87549	2	RXN-12954	2.23607	2	RXN-9931	2.9001	2	RXN-15942
	RXN-20373	2.6697	1	RXN-20373	2.6697	1	RXN-20418	3.27776	1	RXN-15229	3.41428	NIL	1.2.1.66-RXN	3.20824	1	RXN-10930	2.92159	NIL	R122-RXN	2.85193	3	RXN-5822	3.03879	3	RXN-11569	3.08708	3	RXN-12324_r	3.01417	NIL	RXN-17042	3.02604	NIL	RXN-13628	3.0758	NIL	2.1.1.86-RXN_f	3.10338	2	PHLORETIN-HYDROLASE-RXN	2.87551	3	GALACTOACETYLTRAN-RXN	2.24848	2	RXN18C3-38	2.90518	NIL	MCHMBARK-RXN_f
	RXN-11959	2.6697	1	RXN-11959	2.6697	1	RXN-16931	3.28711	NIL	RETINAL-DEHYDROGENASE-RXN	3.41702	1	AZOBENZENE-REDUCTASE-RXN	3.20865	1	RXN-17344_f	2.9256	1	RXN-21374	2.86667	NIL	ATPPHOSPHORIBOSYLTRANS-RXN_f	3.03948	2	TROPINESTERASE-RXN	3.10469	3	RXN-19356	3.02191	NIL	3.5.1.26-RXN	3.04966	3	RXN-19814	3.08507	3	2.1.1.86-RXN_r	3.10338	2	2.1.3.7-RXN	2.876	2	RXN-16841	2.2673	NIL	RXN18C3-34	2.91917	NIL	MCHMBARK-RXN_r
	RXN-20374	2.6697	1	RXN-20374	2.6697	1	RXN-20430	3.29156	1	RXN-9971	3.43818	1	RXN-9232	3.21276	1	RXN-17344_r	2.9256	1	GART-RXN_f	2.86928	2	ATPPHOSPHORIBOSYLTRANS-RXN_r	3.03948	2	RXN-18071	3.10508	NIL	RXN0-6427	3.02211	3	RXN-6242	3.06508	1	CHLOROGENATE-HYDROLASE-RXN	3.09837	3	RXN-17129	3.10398	4	RXN-18838	2.87675	1	RXN-12235	2.27799	NIL	RXN-16591	2.92187	NIL	5.4.1.2-RXN_f
	RXN-20441	2.6697	1	RXN-20441	2.6697	1	RXN-17004	3.30281	NIL	ANHYDROTETRACYCLINE-MONOOXYGENASE-RXN	3.43866	1	RXN-11081	3.22804	1	3.5.1.92-RXN	2.92839	3	GART-RXN_r	2.86928	2	RXN-8454	3.03997	1	RXN-18857	3.10546	3	3.2.1.129-RXN	3.02601	3	RXN-13696	3.07978	3	RXN-18763	3.10216	3	RXN-9301	3.10961	NIL	RXN-14263	2.88521	3	RXN-16493	2.28334	NIL	TETHYDPICSUCC-RXN	2.93013	2	5.4.1.2-RXN_r
	RXN-11938	2.6697	1	RXN-11938	2.6697	1	RXN-16252	3.33132	NIL	RXNQT-4335	3.44226	1	RXN-17969	3.2819	1	RXN-18848	2.93322	NIL	RXN-16869	2.86933	NIL	RXN-16160	3.04134	NIL	RXN-13791	3.11435	NIL	RXN-8677	3.02715	NIL	RXN-13628	3.08121	NIL	RXN-21215	3.10721	NIL	STRICTOSIDINE-SYNTHASE-RXN	3.12066	4	RXN-19875	2.89579	NIL	CARNITINE-O-ACETYLTRANSFERASE-RXN_f	2.29476	2	RXN-13441	2.94319	2	STRICTOSIDINE-SYNTHASE-RXN
	RXN-11933	2.6697	1	RXN-11933	2.6697	1	RXN-15046	3.33288	1	RXN-15495	3.47019	NIL	1.5.1.9-RXN	3.28843	1	RXN-15820	2.93436	NIL	DIMETHYLARGININASE-RXN	2.87572	3	GDPMANDEHYDRA-RXN	3.05674	4	RXN-13628	3.13568	NIL	RXN-21331	3.02769	NIL	RXN-8342	3.08808	2	RXN-8036	3.10783	3	RXN-20244	3.13457	NIL	RXN-17334	2.90538	NIL	CARNITINE-O-ACETYLTRANSFERASE-RXN_r	2.29476	2	RXN-14799	2.94641	2	RXN-13852
	RXN-13812	2.68208	1	RXN-13812	2.68208	1	RXN-20421	3.34909	1	RXN-12926	3.48975	1	RXN-16589	3.30756	NIL	RXN-16312	2.95269	1	RXN-15568	2.87912	3	RXN-17900	3.05859	NIL	RXN-16511	3.14142	NIL	RXN-19641	3.03663	4	RXN-14689	3.09643	1	RXN0-4181	3.13028	3	RXN-19170	3.13693	NIL	RXN-17344_f	2.91678	1	RXN-15943	2.30311	2	RXN-17845	2.94758	2	3.5.4.27-RXN
	MORPHINE-6-DEHYDROGENASE-RXN_f	2.71031	1	MORPHINE-6-DEHYDROGENASE-RXN_f	2.71031	1	RXN-12747_f	3.3549	1	RXN-10646	3.5299	NIL	RXN-12926	3.30994	1	RXN-11751_f	2.95333	3	DDT-DEHYDROCHLORINASE-RXN_f	2.88382	4	GLUTAMIDOTRANS-RXN	3.06522	4	RXN-14689	3.15077	1	RXN-13628	3.04842	NIL	RXN-16484	3.10344	3	RXN-21033	3.14493	NIL	2.3.1.101-RXN_f	3.13782	2	RXN-17344_r	2.91678	1	RXN-19257	2.32916	NIL	RXN-21225	2.97029	2	RXN-20071
	MORPHINE-6-DEHYDROGENASE-RXN_r	2.71031	1	MORPHINE-6-DEHYDROGENASE-RXN_r	2.71031	1	RXN-12747_r	3.3549	1	1.1.1.253-RXN_f	3.58983	1	RXN-12925	3.34003	1	RXN-11751_r	2.95333	3	DDT-DEHYDROCHLORINASE-RXN_r	2.88382	4	RXN-13628	3.06854	NIL	RXN-13693	3.15661	3	RXN-15734	3.04924	2	RXN-16511	3.11778	NIL	PRIBFAICARPISOM-RXN	3.15815	5	2.3.1.101-RXN_r	3.13782	2	RXN-15412	2.91845	NIL	MALTACETYLTRAN-RXN	2.33988	2	RXN-10985	2.97191	NIL	RXN-19895_f
	CYCLOHEXADIENYL-DEHYDROGENASE-RXN	2.74226	1	CYCLOHEXADIENYL-DEHYDROGENASE-RXN	2.74226	1	RXN-15050	3.37158	NIL	1.1.1.253-RXN_r	3.58983	1	1.5.1.7-RXN	3.35677	1	RXNQT-4191	2.96931	3	RXN0-743	2.889	5	STRICTOSIDINE-SYNTHASE-RXN	3.06864	4	RXN-16483	3.16092	3	RXN-8763	3.05409	3	RXN-14863	3.12553	3	3.2.1.156-RXN	3.20109	3	RXN-20145	3.1401	NIL	RXN-21231	2.92735	1	RXN-14454_f	2.35158	2	RXN18C3-30	2.97708	NIL	RXN-19895_r
	RXN-21337_f	2.7539	NIL	RXN-21337_f	2.7539	NIL	RXN-15057	3.37388	NIL	RXN-12925	3.5904	1	RXN-5283	3.37292	NIL	RXN-668	2.97709	NIL	RXN-20731	2.88907	3	FADSYN-RXN_f	3.08319	2	RXN-10846	3.16605	4	RXN-11802	3.05851	2	RXN-1444	3.13038	3	RXN-14092	3.22415	3	2.1.1.132-RXN	3.15406	2	RXN-13811	2.93611	3	RXN-14454_r	2.35158	2	ARGININE-N-SUCCINYLTRANSFERASE-RXN	2.97811	2	RXN-12153
	RXN-21337_r	2.7539	NIL	RXN-21337_r	2.7539	NIL	RXN-10924	3.38021	NIL	1.2.1.66-RXN	3.61924	1	RXN-18814	3.39628	1	RXN-20732	2.97847	3	RXN-12612	2.90599	NIL	FADSYN-RXN_r	3.08319	2	RXN-8454	3.17274	1	RXN-16511	3.0653	NIL	RXN-13967	3.13715	2	RXN-10769	3.24009	3	RXN-2884	3.17081	NIL	RXN-21094	2.95151	NIL	RXN-2202	2.3619	2	RXN-15950	2.98242	NIL	1.8.98.1-RXN
	RXN-18814	2.7727	1	RXN-18814	2.7727	1	RXNQT-4335	3.42446	1	RXN-14171	3.62194	1	RXN-17231	3.41055	NIL	RXN-21242	2.98344	NIL	4.99.1.7-RXN	2.91429	4	RXN-8474	3.113	2	RXN-12055	3.18406	NIL	RXN-13967	3.06943	2	RXN-15603	3.14278	NIL	PPGPPSYN-RXN	3.2516	3	RXN-19191	3.17119	NIL	THIAMINASE-RXN	2.95298	3	RXN-11130	2.39079	NIL	RXN-14803	2.98278	2	RXN-8505
	1.1.1.53-RXN	2.78323	1	1.1.1.53-RXN	2.78323	1	1.1.1.253-RXN_f	3.48399	1	RIBOFLAVINSYNREDUC-RXN	3.63597	1	RXN-19329	3.42039	1	RXN-8743	2.98659	3	RXN-11099	2.93048	NIL	RXN-8475	3.11306	2	RXN-15749	3.18504	NIL	4.2.3.12-RXN	3.07068	4	RXN-18068	3.14715	NIL	RXN-13693	3.25307	3	RXN-19356	3.17737	NIL	RXN-19276	2.95849	NIL	GLUCOSAMINE-N-ACETYLTRANSFERASE-RXN_f	2.40067	2	RXN-10996	2.99055	NIL	RXN-14429
	RXN66-570	2.78323	NIL	RXN66-570	2.78323	NIL	1.1.1.253-RXN_r	3.48399	1	RXN-19186	3.64469	NIL	DIHYDROFOLATEREDUCT-RXN	3.42039	1	HYDROXYMANDELONITRILE-LYASE-RXN	2.98891	4	METHENYLTHFCYCLOHYDRO-RXN_f	2.93149	3	RXN-19360	3.11847	2	RXN-15730	3.18902	4	RXN-8036	3.07132	3	RXN-13970	3.1526	2	RXN-18661	3.25774	2	RXN-19172	3.17785	NIL	RXN-16056	2.96199	NIL	GLUCOSAMINE-N-ACETYLTRANSFERASE-RXN_r	2.40067	2	RXN-10735	2.99579	NIL	RXN-15497
	1.1.1.145-RXN_f	2.78323	1	1.1.1.145-RXN_f	2.78323	1	RXN-15407	3.48459	1	RXN-16753	3.65587	NIL	RXN-17420_f	3.42043	1	RXN-13340	2.99264	NIL	METHENYLTHFCYCLOHYDRO-RXN_r	2.93149	3	RXN0-262	3.13257	2	RXN-14640	3.19487	3	RXN0-5507	3.07178	4	RXN-20979	3.15905	NIL	RXN0-6427	3.25922	3	RXN-20983	3.18306	NIL	RXN-14703	2.96835	3	SPERMACTRAN-RXN	2.40309	2	RXN18C3-47	2.99702	NIL	RXNQT-4359
	1.1.1.145-RXN_r	2.78323	1	1.1.1.145-RXN_r	2.78323	1	RXN-11982	3.50206	NIL	RXN-17231	3.70362	NIL	RXN-17420_r	3.42043	1	RXN-18106	2.99392	NIL	RXN-7973	2.93577	1	RXN-8344	3.13324	2	PRTRANS-RXN_f	3.20931	2	RXN-20979	3.07652	NIL	RXN-16512_f	3.16646	3	PRTRANS-RXN_f	3.26079	2	RXN-8474	3.2033	2	RXN-20738	2.96864	3	RXN0-7165	2.40309	2	RXN-10733	2.99841	NIL	2.1.1.131-RXN
	RXN-15818	2.78645	NIL	RXN-15818	2.78645	NIL	1.3.1.54-RXN_f	3.50747	1	1.1.1.288-RXN	3.73178	1	RXN-16741	3.42351	NIL	RXN66-62	3.00114	NIL	RXN-14174	2.93643	3	RXN-13252	3.15567	4	PRTRANS-RXN_r	3.20931	2	RXN-16512_f	3.09101	3	RXN-16512_r	3.16646	3	PRTRANS-RXN_r	3.26079	2	RXN-14429	3.21694	3	TANNASE-RXN	2.97683	3	RXN-10985	2.40321	NIL	RXN-9610	3.00207	NIL	RXN-13908
	RXN-12789_f	2.80624	1	RXN-12789_f	2.80624	1	1.3.1.54-RXN_r	3.50747	1	RXN-16455	3.73691	NIL	RXN-16443	3.43067	NIL	RXN-21374	3.00205	NIL	ADDALT-RXN	2.93915	3	RXN0-5359	3.16388	2	RXN-18661	3.21318	2	RXN-16512_r	3.09101	3	RXN-12177	3.16646	3	RXN-12404	3.27326	NIL	RXN-6261	3.21781	6	RXN-17842	2.97756	NIL	RXN3DJ-35528	2.40927	2	RXN-16841	3.00331	NIL	RXN-12764
	RXN-12789_r	2.80624	1	RXN-12789_r	2.80624	1	RXN-15434	3.5152	1	RXN-16755	3.75188	NIL	RXN-16590	3.46177	NIL	RXN-21220	3.0031	3	RXN-16743	2.94793	NIL	RXN-19504	3.1655	3	RXN-16512_f	3.21461	3	RXN-12177	3.09101	3	RXN-17842	3.17015	NIL	RXN-16250	3.28156	3	RXN-19799	3.22203	NIL	RXN-14861	2.98693	NIL	RXN-10986	2.4201	NIL	RXN-14793	3.00991	2	RXN-11262
	RXN-20102	2.8287	1	RXN-20102	2.8287	1	RXN-10057	3.52431	1	1.5.1.9-RXN	3.76021	1	RXN-10057	3.46355	1	3.4.22.40-RXN	3.0031	3	RXN-14118	2.95984	3	RXN-16251	3.17117	NIL	RXN-16512_r	3.21461	3	PPGPPSYN-RXN	3.09303	3	RXN-13693	3.18215	3	RXN-8763	3.28186	3	RXN-19014	3.2262	5	RXN-12575	2.99423	3	RXN-15074	2.43602	2	RXN-7561	3.01505	2	RXN-8761
	1.1.1.170-RXN	2.8287	1	1.1.1.170-RXN	2.8287	1	RXN-16753	3.53383	NIL	RXN-20649	3.7776	1	RXN-15818	3.47431	NIL	RXN-21219	3.0031	3	RXN-16870	2.96487	NIL	RXN-14640	3.17755	3	RXN-12177	3.21461	3	RXN0-5359	3.09665	2	RXN-19300	3.18697	2	RXN-14640	3.28399	3	1.8.98.1-RXN	3.22844	1	RXN-12550	2.99423	3	RXN-16879	2.43836	NIL	RXN-20405	3.01546	2	RXN-10134
	RXN-13926	2.8287	1	RXN-13926	2.8287	1	RXN-13382	3.55652	NIL	RXN-16930	3.80773	NIL	RXN-16437	3.47783	NIL	4-ACETAMIDOBUTYRYL-COA-DEACETYLASE-RXN	3.00409	3	R123-RXN	2.9737	3	RXN-20979	3.17892	NIL	RXN-14436	3.21894	NIL	RXN-11569	3.09865	3	STREPTOMYCIN-6-PHOSPHATASE-RXN	3.18702	3	RXN-18226	3.28678	3	RXN-5467	3.23105	2	RXN-12576	2.99423	3	RXNQT-4163	2.4438	2	RXN-18368	3.01954	2	RXN-8081
	RXN66-23	2.8287	1	RXN66-23	2.8287	1	RXN-18463	3.61553	NIL	RXN-14019	3.8129	NIL	RXN-19984	3.49047	NIL	RXN-15749	3.00471	NIL	RXN-7733	2.97431	1	RXN-16427	3.17985	2	RXN-1444	3.21927	3	STRICTOSIDINE-SYNTHASE-RXN	3.10239	4	RXNQT-4359	3.1917	3	RXN-18068	3.29711	NIL	RXN-5466	3.23105	2	RXN-12579	2.99423	3	RXN-9382	2.49362	2	RXN-10725	3.03423	NIL	RXN-11793
	RXN66-18	2.8287	1	RXN66-18	2.8287	1	RXN-7835	3.6621	NIL	RXN-17421	3.81535	NIL	ANHYDROTETRACYCLINE-MONOOXYGENASE-RXN	3.49739	1	RXN-18167	3.00633	1	RXN-19352	2.97852	3	RXN-12839	3.20157	5	RXN-8763	3.22248	3	RXN-15603	3.10702	NIL	TROPINESTERASE-RXN	3.19676	3	RXN-13696	3.30788	3	RXN-10009	3.23416	2	RXN-8635	2.99476	1	RXN-10829	2.50035	2	HYDROXYMETHYLGLUTARYL-COA-HYDROLASE-RXN	3.04107	3	2.1.1.132-RXN
	RXN66-318	2.8287	1	RXN66-318	2.8287	1	RXN-11053	3.67321	1	RXN-15049	3.83563	NIL	RXN-16442	3.50786	NIL	CYTIDEAM-RXN	3.01546	3	4.99.1.3-RXN	2.98589	4	RXN-12840	3.20157	5	3.5.1.26-RXN	3.24416	3	RXN-12150	3.10869	NIL	RXN-13182	3.20429	3	RXN-12024	3.31584	3	RXN-19188	3.23435	NIL	RXN-18509	2.99856	NIL	HISTIDINE-N-ACETYLTRANSFERASE-RXN_f	2.51312	2	RXN-8032_f	3.04477	NIL	RXN-8768
	RXN66-313	2.8287	1	RXN66-313	2.8287	1	RXN-14715	3.68654	NIL	1.5.1.7-RXN	3.83791	1	RXN-16436	3.54185	NIL	3.1.1.56-RXN	3.01626	3	SIROHEME-FERROCHELAT-RXN	2.98589	4	RXN-19361	3.20759	2	RXN-11192	3.25847	3	PRTRANS-RXN_f	3.1177	2	PRTRANS-RXN_f	3.20726	2	RXN-14615	3.33404	NIL	RXN-20979	3.23804	NIL	THIAMIN-PYRIDINYLASE-RXN	3.00396	2	HISTIDINE-N-ACETYLTRANSFERASE-RXN_r	2.51312	2	RXN-8032_r	3.04477	NIL	RXN-1063
	RXN-20100	2.8287	1	RXN-20100	2.8287	1	RXN-20994	3.69585	1	RXN-8568	3.84874	1	RXN-16440	3.55684	NIL	3.8.1.7-RXN	3.02304	3	RXN-8059	2.98589	4	RXN-14689	3.20809	1	RXN-17842	3.26688	NIL	PRTRANS-RXN_r	3.1177	2	PRTRANS-RXN_r	3.20726	2	RXN-18222_f	3.33649	3	2.3.1.103-RXN	3.23959	2	RXN-14856	3.01053	NIL	RXN-20296	2.51708	NIL	RXN-8809	3.04594	2	RXN-15635
	RXN-20095	2.8287	NIL	RXN-20095	2.8287	NIL	RXN-13945	3.70457	NIL	RXN-9232	3.86759	1	RXN-16439	3.57126	NIL	BILIRUBIN-OXIDASE-RXN	3.03086	1	UROGENDECARBOX-RXN	2.9876	4	5.1.3.23-RXN	3.20971	5	RXN-17042	3.2826	NIL	RXN-21073	3.1278	NIL	RXN-14478	3.21289	NIL	RXN-18222_r	3.33649	3	RXN-19171	3.24534	NIL	RXN-8793	3.01145	4	RXN-10837	2.53346	2	RXN-12697	3.05063	NIL	RXN-20727
	RXN-20116	2.8287	1	RXN-20116	2.8287	1	RXN-13385	3.71858	NIL	RXN-16928	3.89068	NIL	RXN-16774_f	3.57759	1	RXNQT-4344	3.03608	NIL	R312-RXN	2.98904	NIL	RXN-11569	3.21092	3	RXN0-4641_f	3.29712	4	RXN-8454	3.13247	1	RXN-15028	3.21833	NIL	RXN-5822	3.33654	3	RXN-11029	3.24738	2	RXN-18342	3.01578	NIL	R102-RXN_f	2.5367	2	RXN-12695	3.05063	NIL	RXN-20730
	RXN-20125	2.8287	1	RXN-20125	2.8287	1	1.14.13.58-RXN	3.78294	1	RXN-16590	3.93792	NIL	RXN-16774_r	3.57759	1	RXN-12266_f	3.04165	NIL	RXN-17605_f	2.99347	5	RXN-14615	3.21478	NIL	RXN0-4641_r	3.29712	4	RXN-16484	3.13955	3	RXN-9162	3.21878	NIL	STREPTOMYCIN-6-PHOSPHATASE-RXN	3.34193	3	RXN-12366	3.25115	2	RXN-20322	3.01839	NIL	R102-RXN_r	2.5367	2	RXN-20296	3.05379	NIL	RXN-20729
	RXN-20109	2.8287	1	RXN-20109	2.8287	1	RXN-19816	3.80079	1	RXN-11998	3.94104	1	RXN-15049	3.5931	NIL	RXN-12266_r	3.04165	NIL	RXN-17605_r	2.99347	5	RXN-12819	3.23732	3	PRIBFAICARPISOM-RXN	3.29855	5	RXN-18377	3.14007	4	RXN-19301	3.219	2	RXN-14270	3.36688	2	RXN-8475	3.25182	2	RETICULINE-OXIDASE-RXN	3.02522	1	RXN-13871	2.53853	2	HYDROXYMETHYLGLUTARYL-COA-SYNTHASE-RXN_f	3.05781	2	RXN-2882
	RXN-17976	2.83829	1	RXN-17976	2.83829	1	RXN-5283	3.81933	NIL	RXN-9276	3.95032	1	RXN-16495	3.60496	NIL	AICARTRANSFORM-RXN_f	3.04608	2	RXN-14333	2.99895	1	RXN-16934	3.24156	NIL	RXN-9162	3.30239	NIL	GDPMANDEHYDRA-RXN	3.1495	4	RXN-15734	3.22986	2	RXN-13967	3.36862	2	RXN-19177	3.27021	NIL	RXN-13185	3.03078	1	RXN-1381	2.55417	2	HYDROXYMETHYLGLUTARYL-COA-SYNTHASE-RXN_r	3.05781	2	HISTCYCLOHYD-RXN
	UDPMANNACADEHYDROG-RXN	2.85939	1	UDPMANNACADEHYDROG-RXN	2.85939	1	RXN-17424	3.85396	1	RXN-16443	3.96076	NIL	RXN-13433_f	3.60842	1	AICARTRANSFORM-RXN_r	3.04608	2	RXN-20732	3.0001	3	RXN-15376_f	3.24396	2	RXN-14421	3.3043	2	STREPTOMYCIN-6-PHOSPHATASE-RXN	3.15287	3	RXN-9488	3.23026	3	RXN-15789	3.38764	NIL	HEMN-RXN	3.27053	1	RXN-12609	3.04551	5	RXN-19376	2.55659	2	RXN-12806	3.06692	2	RXN-8799
	1.1.1.136-RXN	2.85939	1	1.1.1.136-RXN	2.85939	1	RXN-18464	3.86499	NIL	RXN-16589	3.9699	NIL	RXN-13433_r	3.60842	1	2.1.3.7-RXN	3.05202	2	3.1.1.54-RXN	3.00387	3	RXN-15376_r	3.24396	2	RXN-12356	3.30815	3	RXN-12839	3.162	5	RXN-19641	3.23895	4	RXN-15603	3.39565	NIL	FTRMBARK-RXN_f	3.27647	2	RXN-7813	3.05512	2	METHYLACETOACETYLCOATHIOL-RXN_f	2.56081	2	RXN-14735	3.06692	NIL	RXN-18337
	RXN-13468	2.86457	1	RXN-13468	2.86457	1	RXN-13084	3.87429	NIL	RXN-16437	3.97066	NIL	TRYPTOPHAN-DEHYDROGENASE-RXN_f	3.61394	1	RXN-18751_f	3.05232	5	RXN-21242	3.00744	NIL	RXN-17832	3.24864	3	RXN-14270	3.31147	2	RXN-12840	3.162	5	RXN-14021	3.24411	3	RXN-13970	3.40085	2	FTRMBARK-RXN_r	3.27647	2	RXN-17826	3.06443	3	METHYLACETOACETYLCOATHIOL-RXN_r	2.56081	2	RXN18C3-26	3.06878	NIL	RXN-11112
	RXN-10032	2.88306	1	RXN-10032	2.88306	1	RXN-17335	3.87472	1	AZOBENZENE-REDUCTASE-RXN	4.00782	1	TRYPTOPHAN-DEHYDROGENASE-RXN_r	3.61394	1	RXN-18751_r	3.05232	5	RXN-12213	3.01506	NIL	RXN-21213	3.25587	NIL	RXN-19641	3.31186	4	RXN-12024	3.16583	3	RXN-14267	3.2452	3	OLIGOGALACTURONIDE-LYASE-RXN	3.40588	4	RXN-11054	3.27849	4	RXN-8746	3.0715	3	2-ISOPROPYLMALATESYN-RXN	2.59661	2	RXN-10086	3.08325	2	RXN-14479
	RXN-15030	2.89807	NIL	RXN-15030	2.89807	NIL	RXN-17980	3.87761	1	RXN-16741	4.01104	NIL	RXN-20330	3.64767	NIL	RXN-12790	3.05545	5	FORMYLTHFDEFORMYL-RXN	3.02083	3	RXN-13212_f	3.26432	NIL	RXN1QP9-73	3.31707	NIL	RXN-1444	3.17889	3	STRICTOSIDINE-SYNTHASE-RXN	3.24542	4	2.3.1.103-RXN	3.41195	2	5.4.1.2-RXN_f	3.30571	5	RXN0-5040	3.07183	NIL	RXN-9610	2.60081	NIL	RXN18C3-46	3.08442	NIL	MTDMBARK-RXN_f
	1.1.1.64-RXN	2.90648	1	1.1.1.64-RXN	2.90648	1	ANHYDROTETRACYCLINE-MONOOXYGENASE-RXN	3.89968	1	RXN-20779	4.0326	NIL	RXN-18357	3.65243	1	RXN-12674	3.06105	1	RXN-18509	3.02404	NIL	RXN-13212_r	3.26432	NIL	RXN-15603	3.32385	NIL	RXN-16250	3.20227	3	RXN-17053	3.24695	NIL	RXN-17079	3.41755	NIL	5.4.1.2-RXN_r	3.30571	5	RXN-8450	3.07936	1	2.3.1.89-RXN	2.60828	2	RXN-14937	3.09947	3	MTDMBARK-RXN_r
	RXN-12264_f	2.91209	1	RXN-12264_f	2.91209	1	RXN-16583	3.91442	NIL	RXN-18814	4.0457	1	RXN-14016	3.66563	NIL	RXN-14118	3.06115	3	RXN-11753_f	3.03793	NIL	RXN-19359	3.2763	2	RXN-20979	3.3257	NIL	RXN-14270	3.20475	2	RXN-11192	3.25087	3	RXN-12150	3.42392	NIL	RXN-16934	3.31244	NIL	TROPINESTERASE-RXN	3.08273	3	RXN-16663	2.61064	NIL	RXN18C3-49	3.10503	NIL	RXN-17532
	RXN-12264_r	2.91209	1	RXN-12264_r	2.91209	1	RXN-16406	3.92993	NIL	RXN-16254	4.06026	NIL	GEISSOSCHIZINE-DEHYDROGENASE-RXN	3.67609	1	4-NITROPHENYLPHOSPHATASE-RXN	3.06281	3	RXN-11753_r	3.03793	NIL	CHLOROGENATE-HYDROLASE-RXN	3.28394	3	RXN-14478	3.32576	NIL	RXN-19504	3.20571	3	2.3.1.98-RXN	3.27773	2	RXNQT-4359	3.42981	3	RXN-11664	3.31523	3	RXN-19277	3.08377	NIL	RXN-18530	2.61299	2	RXN0-7345	3.10829	NIL	RXN-14989
	1.1.1.209-RXN	2.91209	1	1.1.1.209-RXN	2.91209	1	RXN-8787	3.9585	1	RXN-16436	4.0673	NIL	RXN-16755	3.67691	NIL	2.1.1.90-RXN	3.06313	2	THIAMIN-PYRIDINYLASE-RXN	3.03983	2	RXN-19043	3.28933	NIL	OLIGOGALACTURONIDE-LYASE-RXN	3.32671	4	RXN-14689	3.21091	1	RXN-14421	3.28333	2	12-ALPHA-L-FUCOSIDASE-RXN	3.44592	3	RXN-15962	3.32062	NIL	RXN-8217	3.08538	NIL	RXN1R65-39	2.61325	NIL	RXN18C3-39	3.1087	NIL	BA7DEHYDRA-RXN
	RXN66-567_f	2.91209	1	RXN66-567_f	2.91209	1	RXN-11081	3.97337	1	RXN-16442	4.06921	NIL	RXN-20331	3.67876	NIL	3.1.1.78-RXN	3.07089	3	RXN-8743	3.04706	3	RXN-10647	3.29256	NIL	RXN-6242	3.33067	1	RXN-13252	3.2197	4	RXN-16487	3.28539	NIL	OROPRIBTRANS-RXN_f	3.45041	2	RXN-10860_f	3.32315	NIL	RXN1F-93	3.08782	1	2.3.1.160-RXN	2.61418	2	RXN0-7104	3.11505	NIL	RXN-16938
	RXN66-567_r	2.91209	1	RXN66-567_r	2.91209	1	RXN-14171	3.97668	1	RXN-16440	4.08	NIL	RXN-14855	3.6791	1	RXN-11192	3.08508	3	RXN-21206	3.05726	NIL	R346-RXN	3.30627	3	RXN-9485	3.33933	4	GLUTAMIDOTRANS-RXN	3.2263	4	RXN-14432	3.28548	2	OROPRIBTRANS-RXN_r	3.45041	2	RXN-10860_r	3.32315	NIL	RXN-8677	3.09037	NIL	RXN-13112	2.65228	2	RXN-12699	3.11528	NIL	RXN-9995
	RXN-9841	2.91209	1	RXN-9841	2.91209	1	RXN-4210	3.98315	1	RXN-9087	4.09419	1	RXN-5961	3.68662	NIL	1.21.3.1-RXN	3.09282	1	RXN-18933	3.06385	3	RXN-10003	3.3078	2	RXN-12178	3.33964	3	RXN1QP9-73	3.22861	NIL	RXN-16937	3.29291	2	RXN-16937	3.45711	2	RXN-19895_f	3.3235	2	RXN-16459	3.09744	NIL	SERINE-O-ACETTRAN-RXN	2.65766	2	2.3.1.167-RXN	3.11582	2	RXN-19170
	RXN-13688_f	2.91209	1	RXN-13688_f	2.91209	1	RXN-7911	4.00646	NIL	RXN-16439	4.10656	NIL	RXN-14017	3.6937	NIL	RXN-21206	3.09541	NIL	3.1.1.56-RXN	3.07152	3	RXN-17083	3.3078	NIL	RXN-16485	3.33964	3	RXN-16160	3.23479	NIL	RXN-15730	3.29297	4	RXN-11459	3.4725	NIL	RXN-19895_r	3.3235	2	RXN-16743	3.09995	NIL	LYSACET-RXN	2.66779	NIL	GLUTAMINE-N-PHENYLACETYLTRANSFERASE-RXN	3.11794	2	RXN-17401
	RXN-13688_r	2.91209	1	RXN-13688_r	2.91209	1	RXN-17005	4.03008	NIL	RXN-19329	4.11151	1	RXNQT-4335	3.71312	1	RXN-12026	3.10641	NIL	RXN-15261	3.07195	3	RXN-21033	3.30855	NIL	RXN-12150	3.33973	NIL	2.3.1.72-RXN	3.23581	2	RXN-15498	3.2936	NIL	RXN-13207	3.49929	NIL	RXN-12263	3.32603	2	RXN-8342	3.10319	2	RXN-7743	2.68835	2	5-AMINOLEVULINIC-ACID-SYNTHASE-RXN	3.11989	2	RXN-10724
	1.17.1.1-RXN	2.91401	1	1.17.1.1-RXN	2.91401	1	RXNMETA-12672	4.03471	1	DIHYDROFOLATEREDUCT-RXN	4.11151	1	RXN-20649	3.71418	1	RXN-19294_f	3.11193	5	3.5.1.91-RXN	3.07253	3	RXN-21211	3.31865	NIL	RXN-15789	3.34043	NIL	RXN-14432	3.2428	2	RXN-9485	3.29697	4	RXN-8677	3.49974	NIL	RXN-20785	3.33706	2	HYDROXYBUTYRATE-DIMER-HYDROLASE-RXN	3.10356	3	RETINOL-O-FATTY-ACYLTRANSFERASE-RXN_f	2.692	2	RXN-21324	3.1223	NIL	RXN-15962
	RXN66-343	2.92057	1	RXN66-343	2.92057	1	RXN-5284	4.06769	NIL	RXN-14855	4.11532	1	RETINAL-DEHYDROGENASE-RXN	3.71828	1	RXN-19294_r	3.11193	5	RXN-12730	3.07489	2	RXN-15971	3.32323	NIL	RXNQT-4359	3.35266	3	RXN-21215	3.24365	NIL	RXN-12055	3.30118	NIL	3.2.1.26-RXN	3.50433	NIL	RXN-8761	3.3423	NIL	RXN-20732	3.10629	3	RETINOL-O-FATTY-ACYLTRANSFERASE-RXN_r	2.692	2	RXN-10821	3.13664	2	RXN-19692
	GDP-MANNOSE-6-DEHYDROGENASE-RXN	2.92575	1	GDP-MANNOSE-6-DEHYDROGENASE-RXN	2.92575	1	RXN3O-1070_f	4.07189	1	RXN-14018	4.12692	NIL	RXN3O-127	3.74373	1	RXN-19129	3.11273	1	RXN-10890	3.07489	NIL	RXN-19047	3.32346	NIL	STRICTOSIDINE-SYNTHASE-RXN	3.35847	4	RXN-9588	3.25686	NIL	RXN-11569	3.31226	3	RXN-19769	3.50605	3	MCHMBARK-RXN_f	3.35345	3	RXN-14876_f	3.11307	5	RXN-14905	2.70669	2	RXN18C3-35	3.13811	NIL	RXN-11260
	RXN-12085_f	2.92698	NIL	RXN-12085_f	2.92698	NIL	RXN3O-1070_r	4.07189	1	RXN-17225	4.15758	NIL	RXN-14171	3.78961	1	RXN-16966	3.12193	1	4.2.1.103-RXN	3.0779	4	RXN-19315	3.32609	3	STREPTOMYCIN-6-PHOSPHATASE-RXN	3.36161	3	RXN-14338	3.26009	2	RXN-11183	3.32554	3	RXN-14432	3.51067	2	MCHMBARK-RXN_r	3.35345	3	RXN-14876_r	3.11307	5	CITSYN-RXN	2.70669	2	HOMSUCTRAN-RXN	3.14968	2	RXN-8766
	RXN-12085_r	2.92698	NIL	RXN-12085_r	2.92698	NIL	R546-RXN	4.07329	1	RXN-16252	4.15831	NIL	RXN-7660	3.7982	NIL	RXN0-3921	3.12685	NIL	RXN-9048	3.0812	1	RXN-14605	3.32871	3	RXN-16509	3.3618	3	RXN-17900	3.26576	NIL	RXN-15961	3.32987	NIL	RXN-11183	3.51636	3	RXN0-5225	3.35535	3	RXN-13340	3.11491	NIL	GLUTAMINE-N-ACYLTRANSFERASE-RXN	2.72223	2	RXN18C3-48	3.15143	NIL	RXN66-304
	RXN-9307	2.94581	NIL	RXN-9307	2.94581	NIL	1.5.1.20-RXN_f	4.10862	1	RXN-13433_f	4.16201	1	RXN-9492	3.80499	NIL	RXN-20725	3.12786	3	LINA2-RXN	3.09052	NIL	RXN-19314	3.34106	3	RXN-13970	3.36696	2	RXN-14546	3.26844	2	RXN0-5187	3.33172	3	GLYCOSYLCERAMIDASE-RXN	3.52327	3	RXN-11802	3.36206	2	QUERCETIN-23-DIOXYGENASE-RXN	3.11959	1	RXN-17963	2.73092	2	RXN-3641	3.15241	2	RXN-19974
	RXN-12673	2.94776	1	RXN-12673	2.94776	1	1.5.1.20-RXN_r	4.10862	1	RXN-13433_r	4.16201	1	RXN-16254	3.82544	NIL	RXN-10056	3.12846	3	RXN-11751_f	3.09522	3	RXN-12265	3.34753	3	RXN-16510	3.36845	NIL	OROPRIBTRANS-RXN_f	3.28327	2	RXN-12356	3.33209	3	RXN-13695	3.52375	3	RXN-15966	3.36583	NIL	RXN-18106	3.122	NIL	IMIDAZOLE-N-ACETYLTRANSFERASE-RXN_f	2.74498	2	RXN-11752_f	3.1539	NIL	RIBOFLAVIN-SYN-RXN
	BILIVERDIN-REDUCTASE-RXN	2.99236	1	BILIVERDIN-REDUCTASE-RXN	2.99236	1	RXN0-5375	4.13	1	RXN-13585	4.16818	1	RXN-17225	3.83831	NIL	RXN-10058	3.12887	3	RXN-11751_r	3.09522	3	RXN-16037_f	3.35263	NIL	RXN0-5187	3.36927	3	OROPRIBTRANS-RXN_r	3.28327	2	RXN-8793	3.33843	4	RXN-11142	3.52842	3	RXN-17388	3.36809	3	RXNQT-4191	3.12235	3	IMIDAZOLE-N-ACETYLTRANSFERASE-RXN_r	2.74498	2	RXN-11752_r	3.1539	NIL	RXN-13669
	1.5.1.11-RXN	2.99755	1	1.5.1.11-RXN	2.99755	1	RXN-21340	4.13516	1	RXN-19870	4.18433	NIL	GDP-MANNOSE-6-DEHYDROGENASE-RXN	3.8422	1	SUCCINYLDIAMINOPIMTRANS-RXN	3.12973	2	RXN-19600	3.09821	2	RXN-16037_r	3.35263	NIL	RXN-15498	3.37626	NIL	RXN-20244	3.31163	NIL	RXN-18378	3.35619	4	RXN-19356	3.53334	NIL	RXN-15964	3.37833	NIL	RXN-9475	3.12586	4	CHOLINE-O-ACETYLTRANSFERASE-RXN_f	2.74559	2	RXN-20224	3.15693	2	RXN-15966
	PREPHENATEDEHYDROG-RXN	3.00119	1	PREPHENATEDEHYDROG-RXN	3.00119	1	RXN-708	4.15837	NIL	RXN3O-127	4.1994	1	RXN-9487	3.84405	NIL	KIEVITONE-HYDRATASE-RXN	3.13251	4	RXN-7946	3.1007	5	RXN-19322	3.35601	3	RXN-13182	3.37664	3	RXN-14421	3.31947	2	RXN-8666	3.3604	1	RXN-15203_f	3.53742	2	1.8.1.15-RXN	3.39203	1	3.1.1.47-RXN	3.12601	3	CHOLINE-O-ACETYLTRANSFERASE-RXN_r	2.74559	2	RXN18C3-42	3.15823	NIL	RXN-17975
	RXN-18345	3.01445	1	RXN-18345	3.01445	1	ESTRADIOL-17-BETA-DEHYDROGENASE-RXN	4.16175	1	RXN-16495	4.20177	NIL	1.17.1.1-RXN	3.85037	1	RXN-10035	3.14428	3	RXN0-7325	3.10459	NIL	RXN-14633	3.3575	3	RXN-16487	3.38617	NIL	RXN-13696	3.32647	3	PRIBFAICARPISOM-RXN	3.36142	5	RXN-15203_r	3.53742	2	RXN-19159	3.40015	NIL	RXN-18450	3.13073	2	RXN0-6948	2.76195	2	RXN-11007	3.16704	NIL	RXN-15965
	RXN-20193	3.01528	1	RXN-20193	3.01528	1	RXN-4144	4.1713	1	RXN-20418	4.20767	1	RXN-5282	3.8661	NIL	RXN0-5398_f	3.14538	4	RXN-17517	3.10954	1	RXN0-5123	3.361	NIL	OROPRIBTRANS-RXN_f	3.38627	2	RXN-15964	3.3438	NIL	2.3.1.72-RXN	3.36587	2	RXN-12324_f	3.55777	NIL	RXN-21244	3.40047	NIL	RXN-19255	3.13481	NIL	PHOSACETYLTRANS-RXN_f	2.76288	2	RXN18C3-24	3.17746	NIL	RXN-719
	RXN-13433_f	3.02095	1	RXN-13433_f	3.02095	1	RXN-11511	4.17296	1	RXN-7665	4.21361	NIL	RXN-13585	3.87414	1	RXN0-5398_r	3.14538	4	RXN-18225	3.1156	NIL	RXN0-5208	3.36231	NIL	OROPRIBTRANS-RXN_r	3.38627	2	RXN-13693	3.34431	3	RXN0-4641_f	3.37907	4	RXN-12324_r	3.55777	NIL	RXN1G-811	3.40298	NIL	3.1.1.54-RXN	3.13522	3	PHOSACETYLTRANS-RXN_r	2.76288	2	RXN-14492	3.17825	2	RXN-779
	RXN-13433_r	3.02095	1	RXN-13433_r	3.02095	1	RXN-15819	4.18136	1	2-HEXADECENAL-REDUCTASE-RXN	4.21425	1	1.5.1.8-RXN	3.87852	1	RXN-9488	3.14645	3	URATE-OXIDASE-RXN	3.11681	1	RXN0-6427	3.36361	3	RXN-15028	3.39127	NIL	RXN-15730	3.34813	4	RXN0-4641_r	3.37907	4	2.4.1.211-RXN_f	3.55818	2	RXN1G-807	3.40298	NIL	APIGNAR-RXN	3.13621	5	RXN-17960	2.77423	2	RXN-10734	3.18397	NIL	RXN-8357
	RXN-19993	3.02645	NIL	RXN-19993	3.02645	NIL	RXN-905	4.19867	NIL	RXN-15057	4.21763	NIL	UDPMANNACADEHYDROG-RXN	3.88202	1	RXN-21278	3.14744	NIL	RXN-17125	3.11776	NIL	STREPTOMYCIN-6-PHOSPHATASE-RXN	3.36809	3	SEDOBISALDOL-RXN_f	3.39286	4	RXN0-5226	3.35277	3	RXN0-5226	3.38236	3	2.4.1.211-RXN_r	3.55818	2	RXN1G-810	3.40298	NIL	RXN-12674	3.14328	1	RXN-17961	2.77423	2	RXN-16269	3.20693	1	RXN-21331
	RXN-16478	3.04993	1	RXN-16478	3.04993	1	RXN-17969	4.20582	1	RXN-16441_f	4.22649	NIL	1.1.1.136-RXN	3.88202	1	URIDINE-NUCLEOSIDASE-RXN	3.15282	3	RXN-19154	3.11924	NIL	RXN-12920	3.37125	NIL	SEDOBISALDOL-RXN_r	3.39286	4	RXN-16934	3.35526	NIL	RXN-12324_f	3.39115	NIL	RXN-1444	3.57435	3	RXN1G-809	3.40298	NIL	RXN-18493	3.15048	3	RXN-17962	2.77599	2	SUCCINYL-COA-HYDROLASE-RXN	3.21017	3	RXN-19799
	ACYLGLYCERONE-PHOSPHATE-REDUCTASE-RXN	3.07102	1	ACYLGLYCERONE-PHOSPHATE-REDUCTASE-RXN	3.07102	1	RXN-11245	4.2228	1	RXN-16441_r	4.22649	NIL	1.1.1.253-RXN_f	3.88467	1	RXN-17198	3.15587	NIL	3.5.3.22-RXN	3.12388	3	RXN-8770	3.37321	3	RXN-16160	3.41354	NIL	RXN-10009	3.37401	2	RXN-12324_r	3.39115	NIL	RXN-17406	3.57618	2	RXN1G-808	3.40298	NIL	RXN-13424	3.15284	NIL	PHENYLALANINE-N-ACETYLTRANSFERASE-RXN_f	2.79311	2	RXN18C3-31	3.21144	NIL	RXN-20710
	RXN-14818	3.0883	1	RXN-14818	3.0883	1	RXN-17524	4.24451	1	RXN-16438_f	4.22832	NIL	1.1.1.253-RXN_r	3.88467	1	RXN-19328	3.15813	3	UROGENIIISYN-RXN	3.125	4	RXN1QP9-73	3.37593	NIL	RXN-17053	3.41361	NIL	3.2.1.92-RXN	3.37659	3	RXN-21033	3.39415	NIL	RXN0-963	3.58049	NIL	RXN-13628	3.40683	NIL	RXN-14421	3.15289	2	PHENYLALANINE-N-ACETYLTRANSFERASE-RXN_r	2.79311	2	RXN-17062	3.21202	NIL	RXN-9230
	CHOLESTENONE-5-BETA-REDUCTASE-RXN_f	3.09205	1	CHOLESTENONE-5-BETA-REDUCTASE-RXN_f	3.09205	1	RXNQT-4338	4.24933	1	RXN-16438_r	4.22832	NIL	2-HEXADECENAL-REDUCTASE-RXN	3.89269	1	RXN-20731	3.15828	3	XANTHINE-OXIDASE-RXN	3.12634	1	RXN-19358	3.37702	2	RXN-18070	3.41477	NIL	RXN-15961	3.38163	NIL	RXN-16249	3.40002	3	RXN-19641	3.58375	4	RXN-12819	3.40806	3	RXN-11909	3.16155	NIL	RXN-12667	2.80217	NIL	RXN-17715_f	3.2145	2	RXN-16308
	CHOLESTENONE-5-BETA-REDUCTASE-RXN_r	3.09205	1	CHOLESTENONE-5-BETA-REDUCTASE-RXN_r	3.09205	1	RXN-18213	4.24933	1	RXN-14016	4.22839	NIL	RXN-9307	3.92323	NIL	RXN-17826	3.16112	3	HEME-OXYGENASE-DECYCLIZING-RXN	3.13566	1	3.6.1.41-RXN	3.38549	3	RXN-8124	3.41671	2	RXN-17042	3.3831	NIL	RXN-12150	3.40122	NIL	RXN-13203	3.58836	2	RXN-15497	3.41597	NIL	RXN0-5398_f	3.17036	4	RXN-19375	2.80454	2	RXN-17715_r	3.2145	2	RXN-10009
	RXN-16579	3.10136	NIL	RXN-16579	3.10136	NIL	RXNQT-4336	4.24933	1	RXN-19984	4.23224	NIL	RXN-17223	3.9434	NIL	RXN-12495	3.16215	5	SUCCARGDIHYDRO-RXN	3.13831	3	AMYGDALIN-BETA-GLUCOSIDASE-RXN	3.38649	3	RXN-15961	3.41837	NIL	RXN-18226	3.3884	3	RXN-15789	3.4047	NIL	KETOLACTOSE-RXN	3.59339	3	RXN-9230	3.42466	2	RXN0-5398_r	3.17036	4	2.3.1.58-RXN	2.80887	2	RXN18C3-29	3.22318	NIL	GTP-CYCLOHYDRO-I-RXN
	RXN-16742	3.10343	NIL	RXN-16742	3.10343	NIL	RXN-16587	4.2513	NIL	RXN-15818	4.23489	NIL	RXN-16753	3.9507	NIL	LYSOPHOSPHOLIPASE-RXN	3.17217	3	GDPKIN-RXN	3.15104	2	RXN-10034	3.39178	3	RXN-11183	3.42475	3	RXN-8344	3.38895	2	RXN-19356	3.4217	NIL	RXN0-5216	3.59361	NIL	3.5.4.27-RXN	3.42783	3	RXN-8147	3.17084	1	AKPTHIOL-RXN	2.81075	2	RXN-17711	3.22414	2	PRIBFAICARPISOM-RXN
	1.1.1.248-RXN_f	3.10623	1	1.1.1.248-RXN_f	3.10623	1	RXN-14802	4.25971	NIL	RXN-20430	4.24099	1	RXN-18107	3.9547	NIL	RXN-8255	3.17742	NIL	RXN18C3-61	3.15185	3	GLYCOSYLCERAMIDASE-RXN	3.39302	3	RXN66-496	3.42754	3	ATPPHOSPHORIBOSYLTRANS-RXN_f	3.38993	2	RXN-14270	3.42178	2	RXN-17754	3.59699	NIL	RXN-14837	3.42983	2	RXN-8149	3.17109	1	MALSYN-RXN	2.81717	2	RXN-17795	3.22912	2	RIBOFLAVINASE-RXN_f
	1.1.1.248-RXN_r	3.10623	1	1.1.1.248-RXN_r	3.10623	1	RXN-21341	4.31751	1	RXN-20330	4.24429	NIL	RXN-13909	3.9807	1	RXN-16225	3.18261	3	RXN-13642	3.1545	1	RXN-13177	3.39469	3	RXN-13967	3.44262	2	ATPPHOSPHORIBOSYLTRANS-RXN_r	3.38993	2	RXN-19299	3.42246	2	RXN-21331	3.5992	NIL	RXN-20556	3.43182	3	RXN-19154	3.17172	NIL	RXN-11749	2.82486	3	RXN-12565_f	3.22912	2	RIBOFLAVINASE-RXN_r
	RXN-16580	3.10933	NIL	RXN-16580	3.10933	NIL	CHOLESTENONE-5-ALPHA-REDUCTASE-RXN	4.32057	1	BADEL6OXRED-RXN	4.2513	1	RXN-15030	3.98573	NIL	RXN-20322	3.18984	NIL	RXN-10741	3.1545	1	RXN-19310	3.39484	3	RXN-21215	3.44478	NIL	RXN-18072	3.39852	NIL	RXN-16037_f	3.42753	NIL	RXN-16483	3.59934	3	RXN-14479	3.43374	NIL	RXN-7656	3.17235	NIL	AKBLIG-RXN_f	2.84747	2	RXN-12565_r	3.22912	2	RXN-19339
	RXNQT-4178	3.11373	1	RXNQT-4178	3.11373	1	RXN-9971	4.32562	1	RXN-5961	4.26242	NIL	RXN-17967	4.02489	1	RXN-14206	3.19896	4	NMNAMIDOHYDRO-RXN	3.15927	3	RXN-6242	3.39513	1	RXN-16249	3.44652	3	RXN-15722_f	3.41416	NIL	RXN-16037_r	3.42753	NIL	3.5.1.26-RXN	3.61937	3	RXN-21214	3.43399	3	RXN-19294_f	3.18468	5	AKBLIG-RXN_r	2.84747	2	RXN-13617	3.22912	2	RXN-8675
	RXN-14829	3.116	1	RXN-14829	3.116	1	RXN-4282	4.3259	1	RXN-14017	4.26403	NIL	RXN66-479	4.04781	1	RXN-10846	3.19953	4	THIAMINASE-RXN	3.1611	3	RXN-19323	3.39692	3	GDPMANDEHYDRA-RXN	3.45326	4	RXN-15722_r	3.41416	NIL	OROPRIBTRANS-RXN_f	3.43024	2	RXN-19504	3.61949	3	2.4.1.53-RXN	3.44102	2	RXN-19294_r	3.18468	5	HOMOCITRATE-SYNTHASE-RXN_f	2.85365	2	KETOACYLCOATHIOL-RXN	3.22912	2	RXN-19985
	RXN-19871	3.12206	NIL	RXN-19871	3.12206	NIL	1.5.1.15-RXN	4.32628	1	RXN-20331	4.28257	NIL	RXN-20132	4.05039	NIL	RXN-13185	3.20142	1	RXN0-6708	3.16301	NIL	RXN-14179	3.39718	3	RXN-21073	3.46176	NIL	RXN0-6254	3.41802	2	OROPRIBTRANS-RXN_r	3.43024	2	RXN-21073	3.62778	NIL	RXN-15682	3.44951	3	ADCLY-RXN	3.18511	4	HOMOCITRATE-SYNTHASE-RXN_r	2.85365	2	RXN-14788	3.23196	2	RXN-11663
	RXN-7970	3.12451	1	RXN-7970	3.12451	1	RXN-14792	4.32764	NIL	RXN-9492	4.29666	NIL	RXN-19870	4.05344	NIL	RXN-19590	3.20183	3	RXN-10711	3.16551	3	RXN-19320	3.39969	3	RXN0-5226	3.46454	3	RXN-6242	3.41977	1	RXN-17046	3.43438	NIL	RXN-11802	3.63051	2	METHELENE-THMPT-OXI-RXN_f	3.45045	1	RXN-12495	3.18745	5	RXN-17795	2.85634	2	RXN-14774	3.23196	2	RXN-17988
	1.1.1.210-RXN_f	3.12704	1	1.1.1.210-RXN_f	3.12704	1	TRANSENOYLCOARED-RXN	4.33204	1	RXN-20421	4.29918	1	RXN-15615_f	4.06263	1	RXN-14695	3.202	1	RXN-14334	3.18099	NIL	RXNQT-4359	3.39974	3	RXN-19300	3.47074	2	RXN-15749	3.42422	NIL	RXN-12178	3.44964	3	RXN-14478	3.63581	NIL	METHELENE-THMPT-OXI-RXN_r	3.45045	1	2.5.1.70-RXN	3.18815	2	RXN-12565_f	2.85634	2	RXN-20356	3.23843	2	RXN-15414
	1.1.1.210-RXN_r	3.12704	1	1.1.1.210-RXN_r	3.12704	1	RXN-11726	4.33204	1	RXN-5282	4.30337	NIL	RXN-15615_r	4.06263	1	RXN-12115	3.2029	1	RXN-12515	3.18367	3	RXN-18763	3.4022	3	RXN-8222	3.49419	3	RXN-8124	3.43114	2	RXN-16485	3.44964	3	CHOLOYLGLYCINE-HYDROLASE-RXN	3.63662	3	RXN-17178	3.45162	NIL	3.1.1.82-RXN	3.194	3	RXN-12565_r	2.85634	2	RXN-20352	3.23843	2	RXN-16649
	RXN-16455	3.13336	NIL	RXN-16455	3.13336	NIL	RXN66-482	4.33204	1	RXN-2883_f	4.32052	NIL	RXN-14245	4.06604	1	ARYLFORMAMIDASE-RXN	3.20895	3	PROTOPORGENOXI-RXN	3.18975	1	RXN-18045	3.40229	NIL	RXN-9488	3.49438	3	RXN-10846	3.44098	4	RXN-19306	3.4498	2	RXN-13208	3.64074	NIL	RXN-17401	3.45351	4	P-PANTOCYSDECARB-RXN	3.19431	4	RXN-13617	2.85634	2	RXN-12235	3.24605	NIL	RXN-11054
	RXN-11194	3.13571	1	RXN-11194	3.13571	1	RXN-7711	4.33204	1	RXN-2883_r	4.32052	NIL	RXN-7659	4.09497	NIL	RXN-18180	3.20957	NIL	RXN-18221	3.19459	NIL	RXN-21073	3.4041	NIL	RXN-20322	3.49661	NIL	RXN-19315	3.44286	3	RXN-11802	3.45526	2	RXN-15289	3.64275	3	RXN-19013	3.45438	5	RXN-9030	3.19678	3	KETOACYLCOATHIOL-RXN	2.85634	2	RXN-16063	3.24705	3	HEMEOSYN-RXN
	RXN-7632	3.1366	1	RXN-7632	3.1366	1	RXN-14798	4.33931	NIL	1.5.1.8-RXN	4.35243	1	RIBOFLAVINSYNREDUC-RXN	4.11828	1	RXN-18181	3.20957	NIL	RXN-15820	3.20012	NIL	RXN-17079	3.40488	NIL	RXN0-5507	3.49841	4	RXN-19314	3.44374	3	RXN-18071	3.45784	NIL	SEDOBISALDOL-RXN_f	3.64546	4	RXN-13403	3.45496	2	RXN-15056	3.19722	4	RXN-18560	2.85742	2	3.1.2.23-RXN	3.24751	3	RXN-10029_f
	RXN-16513	3.13676	NIL	RXN-16513	3.13676	NIL	RXN-14773	4.34231	NIL	RXN-15407	4.35272	1	RXN-18200_f	4.12652	NIL	RXN-20092	3.21278	1	RXN-9641	3.20019	NIL	RXN-19326	3.40748	3	4.2.3.12-RXN	3.5002	4	RXN-8342	3.44602	2	RXN-16934	3.46795	NIL	SEDOBISALDOL-RXN_r	3.64546	4	RXN-10904	3.45818	NIL	H2PTEROATESYNTH-RXN	3.20199	2	RXN-18555	2.85742	2	3-ETHYLMALATE-SYNTHASE-RXN	3.25625	2	RXN-10029_r
	ERYTHRON4PDEHYDROG-RXN	3.14779	1	ERYTHRON4PDEHYDROG-RXN	3.14779	1	RXN-14787	4.34231	NIL	RXN-17223	4.35357	NIL	RXN-18200_r	4.12652	NIL	RXN-18228	3.21538	NIL	RXN-17519	3.20076	1	RXN-8763	3.40768	3	PRAISOM-RXN	3.50408	5	RXN-16510	3.45806	NIL	RXN-10930	3.47385	NIL	STRICTOSIDINE-SYNTHASE-RXN	3.64665	4	BA7DEHYDRA-RXN	3.45898	4	R181-RXN	3.20242	3	RXN-683	2.86779	NIL	RXN-3585	3.26787	2	RXN-21213
	RXN-17414	3.15602	1	RXN-17414	3.15602	1	RXN-16537	4.35277	NIL	RXN-21292	4.36457	1	RXN-16656	4.13132	1	RXN66-569	3.21614	1	RXN1G-874	3.20392	2	RXN-15603	3.41521	NIL	RXN-14113	3.51323	3	RXN-10003	3.45862	2	RXN-14703	3.47644	3	RXN-15961	3.65689	NIL	RXN-21196	3.46134	NIL	RXN-17343	3.21674	1	RXN-18668	2.88025	2	RXN-19804	3.26859	2	NAPHTHOATE-SYN-RXN
	RXN-17412_f	3.15602	1	RXN-17412_f	3.15602	1	TRANS-2-ENOYL-COA-REDUCTASE-NAD+-RXN	4.37565	1	RXN-7660	4.37036	NIL	INDOLELACTATE-DEHYDROGENASE-RXN	4.13835	1	RXN-19573	3.21854	2	RXN-14206	3.20823	4	RXN-19319	3.41533	3	2.5.1.19-RXN_f	3.51391	2	RXN-17083	3.45862	NIL	3.2.1.129-RXN	3.47678	3	RXN-13212_f	3.65704	NIL	RXN-12324_f	3.4667	NIL	RXN-16966	3.21865	1	RXN18C3-40	2.88134	NIL	RXN-10000	3.27057	2	RXN-12152
	RXN-17412_r	3.15602	1	RXN-17412_r	3.15602	1	RXN-12558	4.37565	1	RXN-19796	4.37132	NIL	RXN-8955	4.17348	1	RXN-11981	3.22095	NIL	SINAPINE-ESTERASE-RXN	3.20925	3	RXN-19324	3.41535	3	2.5.1.19-RXN_r	3.51391	2	RXN-14837	3.47858	2	RXN-16510	3.47712	NIL	RXN-13212_r	3.65704	NIL	RXN-12324_r	3.4667	NIL	BILIRUBIN-OXIDASE-RXN	3.22555	1	RXN-18367	2.89011	2	RXN-13253	3.27057	2	BTUR2-RXN
	RXN-11998	3.1671	1	RXN-11998	3.1671	1	RXN-19428	4.38275	1	RXN-21341	4.37426	1	RXN-19186	4.1864	NIL	MANDELONITRILE-LYASE-RXN	3.22217	4	RXN-8217	3.21057	NIL	RXN-14338	3.42382	2	RXN-14863	3.51796	3	3.5.1.26-RXN	3.48318	3	RXN-17045	3.4776	NIL	RXN-12839	3.65773	5	RXN-14398	3.46913	1	R-6-HYDROXYNICOTINE-OXIDASE-RXN	3.22899	1	N-ACETYLTRANSFER-RXN_f	2.90571	2	2.3.1.160-RXN	3.27476	2	2.5.1.32-RXN
	R201-RXN	3.16763	NIL	R201-RXN	3.16763	NIL	RXN-12750	4.38519	1	RXN-15050	4.37438	NIL	RXN-16262	4.19306	1	GST-RXN	3.22482	2	RXN-7897	3.21307	NIL	RXN-8677	3.43213	NIL	RXN-15734	3.52226	2	RXN0-262	3.48354	2	RXN-19298	3.47841	2	RXN-12840	3.65773	5	3.4.17.13-RXN	3.47102	3	S-6-HYDROXYNICOTINE-OXIDASE-RXN	3.22899	1	N-ACETYLTRANSFER-RXN_r	2.90571	2	RXN0-5065	3.27809	NIL	RXN-19229
	RXN-15053	3.16772	NIL	RXN-15053	3.16772	NIL	1.3.1.62-RXN	4.38864	1	RXN-8794	4.37658	NIL	1.1.1.252-RXN_f	4.19839	1	RXN-15568	3.22588	3	RXN-13185	3.21354	1	RXN-21214	3.43775	3	RXN-8666	3.52605	1	RXN-16509	3.48424	3	RXN-16509	3.4813	3	RXN-15722_f	3.6586	NIL	RXN-8675	3.47151	NIL	RXN-9231	3.22992	4	RXN-11497_f	2.92046	2	TDPFUCACTRANS-RXN	3.27968	2	2.3.1.101-RXN_f
	RXN-20920	3.18083	NIL	RXN-20920	3.18083	NIL	RXN-19803	4.39463	1	1.3.1.54-RXN_f	4.38509	1	1.1.1.252-RXN_r	4.19839	1	RXN-18936	3.23007	3	RXN-9051	3.21514	1	RXN-10769	3.43918	3	RXN-8220	3.5277	3	RXN-15028	3.48908	NIL	RXN-14856	3.48435	NIL	RXN-15722_r	3.6586	NIL	1.5.4.1-RXN	3.4737	1	RXN-9048	3.23614	1	RXN-11497_r	2.92046	2	RXN-13755	3.27968	2	2.3.1.101-RXN_r
	1.1.1.201-RXN_f	3.18825	1	1.1.1.201-RXN_f	3.18825	1	RXN-16034	4.4116	1	1.3.1.54-RXN_r	4.38509	1	RXN-4224	4.20008	NIL	RXN-21122	3.23533	NIL	RXN-7567	3.22564	4	RXN-15332	3.44699	NIL	RXN-19356	3.53062	NIL	RXN-11461	3.50052	4	RXN-21192	3.48488	NIL	RXN-16160	3.66382	NIL	RXN-14430	3.47951	1	1.14.11.26-RXN	3.23897	1	PTAALT-RXN_f	2.9292	2	RXN-20387	3.2841	2	RXN-16305
	1.1.1.201-RXN_r	3.18825	1	1.1.1.201-RXN_r	3.18825	1	RXN-20144	4.41554	NIL	RXN-9487	4.39023	NIL	RXN-3941	4.22122	NIL	RXN-15945	3.23831	2	RXN-13558	3.22756	3	RXN-10009	3.44857	2	RXN-20544	3.53565	3	RXN-16649	3.50194	3	RXN-14861	3.48867	NIL	GDPMANDEHYDRA-RXN	3.67142	4	RXN-16937	3.4818	2	S-NORLAUDANOSOLINE-SYNTHASE-RXN	3.23964	4	PTAALT-RXN_r	2.9292	2	RXN-7792	3.2841	2	2.1.1.86-RXN_f
	RXN-20331	3.19214	NIL	RXN-20331	3.19214	NIL	RXN-17397_f	4.41559	1	RXN-8955	4.40036	1	RXN-9578	4.22522	NIL	RXN-18838	3.24146	1	LINA1-RXN	3.22859	NIL	RXN-15330	3.44862	NIL	RXN-12324_f	3.55086	NIL	RXN-19769	3.50393	3	RXN1QP9-73	3.49239	NIL	RXN-8454	3.67515	1	RXN-12042	3.48903	6	RXN-19972	3.24138	NIL	GLYCINE-N-ACYLTRANSFERASE-RXN	2.93129	2	RXN-20372	3.2841	2	2.1.1.86-RXN_r
	1.1.1.288-RXN	3.19538	1	1.1.1.288-RXN	3.19538	1	RXN-17397_r	4.41559	1	GDP-MANNOSE-6-DEHYDROGENASE-RXN	4.40484	1	RXN-18345	4.23828	1	RXN-8793	3.24174	4	BILIRUBIN-OXIDASE-RXN	3.23238	1	RXN-15964	3.45047	NIL	RXN-12324_r	3.55086	NIL	UDP-GALACTURONATE-DECARBOXYLASE-RXN_f	3.50595	4	RXN-19814	3.49434	3	2.4.1.82-RXN	3.67953	2	PANTEPADENYLYLTRAN-RXN	3.49809	2	RXN-9051	3.25059	1	RXN0-7014	2.95698	2	RXN-12232	3.28716	NIL	RXN-1444
	RXN-14859_f	3.19612	1	RXN-14859_f	3.19612	1	RXN-14495	4.41579	1	RXN-7678	4.4111	1	RXN-14830	4.24566	1	RXN-18105	3.24459	NIL	RXN-9736	3.23995	2	RXN-15328	3.45302	NIL	GALPMUT-RXN_f	3.55788	5	UDP-GALACTURONATE-DECARBOXYLASE-RXN_r	3.50595	4	RXN-15964	3.49657	NIL	RXN0-5359	3.68302	2	LIPIDADISACCHARIDESYNTH-RXN	3.50622	2	RXN-16861	3.25064	NIL	RXN-21226_f	2.97542	2	RXN-16137	3.30034	2	RXN-15959
	RXN-14859_r	3.19612	1	RXN-14859_r	3.19612	1	HADTHAUERA-RXN_f	4.42018	1	1.17.1.1-RXN	4.41561	1	RXN-13389	4.26315	NIL	RXN-11543	3.24583	3	RXN0-7001	3.24596	3	RXN18C3-16	3.45953	NIL	GALPMUT-RXN_r	3.55788	5	UDP-GLUCURONATE-DECARBOXYLASE-RXN	3.50595	4	RXN-8124	3.49853	2	RXN-8124	3.68438	2	RXN-21192	3.51133	NIL	RXN-19731	3.2516	3	RXN-21226_r	2.97542	2	RXN18C3-43	3.30211	NIL	RXN-12265
	RXN-15365	3.19691	NIL	RXN-15365	3.19691	NIL	HADTHAUERA-RXN_r	4.42018	1	RXN-15615_f	4.41706	1	RXN-7658	4.27125	NIL	RXN-10840	3.2467	NIL	ARYLDIALKYL-PHOSPHATASE-RXN	3.25059	3	RXN-8472	3.4657	2	RXN-13165	3.56348	1	RXN0-963	3.50767	NIL	RXN-8222	3.50466	3	RXN-14421	3.69007	2	RXN-15734	3.51312	2	RXN-17532	3.25195	NIL	RXN18C3-36	2.9807	NIL	PHOSPHATE-BUTYRYLTRANSFERASE-RXN_f	3.30805	2	3.4.17.13-RXN
	RXN-9069	3.19994	NIL	RXN-9069	3.19994	NIL	RXN-11934	4.42026	NIL	RXN-15615_r	4.41706	1	RXN-19978	4.28358	NIL	RXN-17343	3.24705	1	RXN-13425_f	3.25749	NIL	RXN-14092	3.46716	3	3.2.1.129-RXN	3.56359	3	RXN-18378	3.51163	4	RXN-20322	3.50888	NIL	ISOMALTULOSE-SYNTHASE-RXN_f	3.69012	5	RXN-15971	3.51695	NIL	RXN-18167	3.25239	1	RXN-12561_f	2.98966	2	PHOSPHATE-BUTYRYLTRANSFERASE-RXN_r	3.30805	2	RXN-17438
	RXN-5682	3.2008	1	RXN-5682	3.2008	1	RXN-17359	4.42145	1	RXN-15543	4.42256	1	RXN-19408	4.28611	NIL	RXN-12252	3.2508	3	RXN-13425_r	3.25749	NIL	RXN-20244	3.46744	NIL	RXN-15722_f	3.56382	NIL	RXN0-5208	3.51499	NIL	RXN-21331	3.51429	NIL	ISOMALTULOSE-SYNTHASE-RXN_r	3.69012	5	RXN0-5123	3.51901	NIL	RXN-9494	3.25675	4	RXN-12561_r	2.98966	2	RXN-4320	3.32197	2	RXN-2884
	GLUTSEMIALDEHYDROG-RXN	3.21077	1	GLUTSEMIALDEHYDROG-RXN	3.21077	1	RXN-20649	4.42825	1	RXN-15514	4.42702	1	RXN-13812	4.30164	1	RIBOFLAVINSYNDEAM-RXN	3.25135	3	RXN-698	3.25926	1	RXN0-5226	3.47455	3	RXN-15722_r	3.56382	NIL	RXN-14479	3.52029	NIL	RXN-15722_f	3.52954	NIL	RXN-19792	3.69271	3	RXN-18020	3.52122	2	2.5.1.67-RXN	3.26027	2	RXN18C3-47	2.99284	NIL	RXN-11497_f	3.32322	2	RXN-9385
	RXN-8684	3.21119	1	RXN-8684	3.21119	1	1.1.1.52-RXN_f	4.43722	1	RXN-15046	4.43134	1	GDP-4-DEHYDRO-D-RHAMNOSE-REDUCTASE-RXN	4.30275	1	RXN-11067	3.25345	1	RXN-7884	3.26416	NIL	RXN-13799	3.48608	NIL	RXN-15964	3.56599	NIL	RXN-19300	3.52052	2	RXN-15722_r	3.52954	NIL	RXN-12039	3.69339	NIL	RXN-12744	3.52732	NIL	RXN-11903	3.26593	5	RXN-0	3.00077	2	RXN-11497_r	3.32322	2	RXN-11283_f
	RXN-8679	3.21119	1	RXN-8679	3.21119	1	1.1.1.52-RXN_r	4.43722	1	GEISSOSCHIZINE-DEHYDROGENASE-RXN	4.43249	1	GDP-6-DEOXY-D-TALOSE-4-DEHYDROGENASE-RXN	4.30275	1	CEPHALOSPORIN-C-DEACETYLASE-RXN	3.25903	3	RXN-11187	3.27303	2	RXN-11142	3.48651	3	RXN-13181	3.56616	3	RXN-16427	3.52329	2	RXN-12839	3.54189	5	RXN-15358_f	3.70833	2	RXN-16498	3.53442	NIL	RXN-16086	3.26706	NIL	HOMOSERINE-O-ACETYLTRANSFERASE-RXN_f	3.00346	2	RXN0-6512	3.32416	2	RXN-11283_r
	8-OXOCOFORMYCIN-REDUCTASE-RXN	3.21361	1	8-OXOCOFORMYCIN-REDUCTASE-RXN	3.21361	1	RXN-12560	4.44122	1	RXNQT-4337	4.47041	1	RXN-16754	4.30372	NIL	LIGNOSTILBENE-ALPHA-BETA-DIOXYGENASE-RXN	3.25915	1	4.3.1.4-RXN_f	3.27391	4	RXN-19700	3.49071	2	RXN-13252	3.56829	4	RXN-18222_f	3.545	3	RXN-12840	3.54189	5	RXN-15358_r	3.70833	2	RXN18HP-6	3.54867	NIL	RXN-18449	3.26921	2	HOMOSERINE-O-ACETYLTRANSFERASE-RXN_r	3.00346	2	2.3.1.164-RXN	3.32614	2	RXN-17442
	N-ACETYLGLUTPREDUCT-RXN_f	3.21448	1	N-ACETYLGLUTPREDUCT-RXN_f	3.21448	1	R267-RXN	4.45791	NIL	TRYPTOPHAN-DEHYDROGENASE-RXN_f	4.47554	1	OROTATE-REDUCTASE-NADH-RXN	4.30495	1	RXN-12575	3.26314	3	4.3.1.4-RXN_r	3.27391	4	RXN-16484	3.49321	3	RXN-13630	3.57222	NIL	RXN-18222_r	3.545	3	RXN-11187	3.54632	2	RXN0-5363_f	3.70852	NIL	2.4.1.206-RXN	3.55164	2	3.3.2.2-RXN	3.27156	3	RXN1-42	3.02459	NIL	RXN-15657_f	3.33162	2	RXN-17832
	N-ACETYLGLUTPREDUCT-RXN_r	3.21448	1	N-ACETYLGLUTPREDUCT-RXN_r	3.21448	1	RXN-12450_f	4.46644	1	TRYPTOPHAN-DEHYDROGENASE-RXN_r	4.47554	1	RXN-14769	4.31318	NIL	RXN-12550	3.26314	3	RXN-15684	3.2747	1	RXN-13596_f	3.49651	2	RXN-18226	3.57578	3	RXN-12178	3.54687	3	RXN-8220	3.552	3	RXN0-5363_r	3.70852	NIL	RXN-17166	3.56826	NIL	RXN-15945	3.27198	2	RXN-20226	3.02459	2	RXN-15657_r	3.33162	2	RXN-19172
	RXN-9489	3.21616	1	RXN-9489	3.21616	1	RXN-12450_r	4.46644	1	UDPMANNACADEHYDROG-RXN	4.48044	1	RXN0-6677	4.32519	NIL	RXN-12576	3.26314	3	RXN-11455_f	3.27709	3	RXN-13596_r	3.49651	2	RXN-19814	3.57724	3	RXN-16485	3.54687	3	RXN-21196	3.55833	NIL	RXN-12055	3.71122	NIL	RXN-9162	3.56857	NIL	RXN-17061	3.27607	NIL	RXN-11796	3.02459	NIL	RXN-9700	3.33412	2	RXN-19973
	RXN-13478	3.21943	1	RXN-13478	3.21943	1	RXN-14486	4.47146	1	1.1.1.136-RXN	4.48044	1	UGD-RXN	4.32633	1	RXN-12579	3.26314	3	RXN-11455_r	3.27709	3	RXN-13137	3.49816	3	RXN0-5216	3.58571	NIL	3.6.1.41-RXN	3.55263	3	RXN-17435	3.56192	4	RXN-17701	3.71211	3	3.2.1.17-RXN	3.57289	3	RXN-19581	3.28023	3	3.1.2.18-RXN	3.02992	3	RXN-4204	3.33917	2	RXN-19013
	RXN-19983	3.22488	NIL	RXN-19983	3.22488	NIL	RXN-19797	4.4715	NIL	GDP-4-DEHYDRO-D-RHAMNOSE-REDUCTASE-RXN	4.50563	1	RXN-7591	4.34023	NIL	RXN0-7001	3.26347	3	RXN-18106	3.28479	NIL	RXN-21192	3.50043	NIL	RXN-15945	3.58905	2	RXN-16483	3.55887	3	CEPHALOSPORIN-C-DEACETYLASE-RXN	3.56214	3	RXN-18149	3.7177	NIL	6.3.1.9-RXN	3.57394	6	RXN-19051	3.28352	4	RXN-14255	3.02992	NIL	RXN-16090	3.34186	NIL	RXN-12745
	RXN-9952	3.23104	1	RXN-9952	3.23104	1	RXN66-342_f	4.47619	1	GDP-6-DEOXY-D-TALOSE-4-DEHYDROGENASE-RXN	4.50563	1	RXN-15053	4.35188	NIL	RXN-9048	3.26862	1	RXN-7891	3.29248	NIL	RXN-16649	3.50773	3	RXN-17138	3.5913	1	RXN-19253_f	3.5682	3	RXN-14113	3.56236	3	RXN-14267	3.71785	3	RXN-18045	3.57414	NIL	RXN-3221	3.28559	5	ACYL-COA-HYDROLASE-RXN	3.02992	3	RXN-13247	3.35254	NIL	RXN-18273
	RXN-9480_f	3.24051	1	RXN-9480_f	3.24051	1	RXN66-342_r	4.47619	1	RXN-18200_f	4.50791	NIL	1.1.1.152-RXN_f	4.3589	1	RXN-17334	3.27071	NIL	RXN-17198	3.29567	NIL	2.4.1.150-RXN	3.50989	2	RXN-20673	3.5922	NIL	RXN-19253_r	3.5682	3	4.2.3.12-RXN	3.56365	4	RXN-14605	3.72027	3	RXNQT-4359	3.57639	3	RXN-16864	3.28768	NIL	3.1.2.19-RXN	3.02992	3	RXN-11668	3.35254	NIL	RXN-17447
	RXN-9480_r	3.24051	1	RXN-9480_r	3.24051	1	RXN-10625	4.48655	1	RXN-18200_r	4.50791	NIL	1.1.1.152-RXN_r	4.3589	1	RXN-8666	3.27637	1	RXN-18167	3.30701	1	3.2.1.92-RXN	3.51158	3	RXN-17046	3.59481	NIL	RXN-16037_f	3.56919	NIL	RXN0-5507	3.56451	4	RXN-15964	3.72085	NIL	RXN0-5208	3.57674	NIL	RXN-14831	3.29116	2	RXN-14251	3.02992	NIL	ACETOACETYL-COA-HYDROLASE-RXN	3.35722	3	RXN-19314
	RXN-8683	3.24343	1	RXN-8683	3.24343	1	RXN-12997	4.4872	1	RXN-18107	4.52583	NIL	RXN-14019	4.35942	NIL	RXN-10896	3.27657	NIL	RXN-19573	3.3142	2	RXN-5467	3.51266	2	RXN-8801	3.59935	5	RXN-16037_r	3.56919	NIL	RXN-17532	3.57191	NIL	RXN0-7219	3.72886	NIL	RXN-8768	3.59137	5	RXN-17198	3.29887	NIL	RXN-20355	3.02992	NIL	RXN-15677	3.36089	2	RXN-14478
	RXN-8678	3.24343	1	RXN-8678	3.24343	1	RXN-17006	4.50162	NIL	RXN-12747_f	4.57463	1	RXN-4229	4.36	NIL	RXN-13973	3.28047	2	RXN-8666	3.31423	1	RXN-5466	3.51266	2	UDP-GALACTURONATE-DECARBOXYLASE-RXN_f	3.60041	4	RXN-9485	3.56938	4	RXN0-4181	3.57709	3	RXN-12920	3.73208	NIL	RXN-13852	3.59264	1	RXN-18441	3.30109	2	RXN-7938	3.03886	3	2.3.1.175-RXN	3.36513	2	RXN-9664
	RXN-20330	3.24397	NIL	RXN-20330	3.24397	NIL	FORMYLTETRAHYDROFOLATE-DEHYDROGENASE-RXN_f	4.50467	1	RXN-12747_r	4.57463	1	RXN-14668	4.36526	NIL	RXN-13425_f	3.28211	NIL	RXN-21232	3.31786	1	RXN-14021	3.52417	3	UDP-GALACTURONATE-DECARBOXYLASE-RXN_r	3.60041	4	RXN-12819	3.58251	3	RXN-18661	3.57917	2	RXN-15790	3.73915	NIL	RXN-15959	3.60487	NIL	RXN-19756	3.30882	NIL	RXN-20219	3.04474	2	RXN0-7046	3.36649	NIL	RXN-10135
	RXN-19981	3.24413	1	RXN-19981	3.24413	1	FORMYLTETRAHYDROFOLATE-DEHYDROGENASE-RXN_r	4.50467	1	RXN66-342_f	4.58071	1	1.5.1.32-RXN	4.37669	1	RXN-13425_r	3.28211	NIL	3.5.1.79-RXN	3.31939	3	RXN-16937	3.52746	2	UDP-GLUCURONATE-DECARBOXYLASE-RXN	3.60041	4	PRAISOM-RXN	3.5829	5	RXN-18073	3.58389	NIL	RXN-20979	3.74099	NIL	STREPTOMYCIN-3-ADENYLYLTRANSFERASE-RXN	3.60556	2	RXN-10913	3.31388	1	ASPARTATE-N-ACETYLTRANSFERASE-RXN	3.06153	2	RXN-16019	3.37809	NIL	R307-RXN
	RXN-19982	3.24413	1	RXN-19982	3.24413	1	RXN-21346_f	4.51405	1	RXN66-342_r	4.58071	1	RXN-15114	4.39768	NIL	RXN-19837	3.28424	NIL	RXN-17067	3.31956	1	RXN-21196	3.52873	NIL	3.2.1.18-RXN	3.60114	3	RXN0-5187	3.58479	3	RXN66-496	3.58449	3	RXN-17178	3.74633	NIL	RXN-19798	3.60951	NIL	RXN-7947	3.31616	5	KETOBUTFORMLY-RXN	3.07086	NIL	RXN0-7103	3.38066	NIL	4.1.2.41-RXN
	RXN-17386	3.24781	1	RXN-17386	3.24781	1	RXN-21346_r	4.51405	1	RXN-14769	4.58291	NIL	RXN-8568	4.40512	1	RXN-13123	3.28584	3	RXN-18073	3.32051	NIL	RXN-10966	3.52959	3	RXN-12839	3.60305	5	RXN-12055	3.59713	NIL	RXN-15945	3.58786	2	SUCROSE-PHOSPHORYLASE-RXN	3.75129	2	RXN-12529	3.61317	NIL	RXN-13181	3.31667	3	RXN-19536	3.07404	2	RXN18C3-45	3.39282	NIL	RXN-16172
	RXN-16539	3.24895	NIL	RXN-16539	3.24895	NIL	RXN-15496	4.53222	NIL	RXN-16929	4.60558	NIL	RXN-12789_f	4.40909	1	RXN-12025	3.28641	NIL	RXN-14263	3.32062	3	RXN-8036	3.53168	3	RXN-12840	3.60305	5	RXN-14863	3.59915	3	RXN-13181	3.59657	3	4.2.3.12-RXN	3.75642	4	4.1.2.41-RXN	3.61729	NIL	RXN-18481	3.31696	3	PYRUVFORMLY-RXN_f	3.16406	2	RXN-20386	3.39283	2	RXN-19315
	RXN-9490	3.25658	1	RXN-9490	3.25658	1	GCVMULTI-RXN_f	4.53286	NIL	1.1.1.152-RXN_f	4.60965	1	RXN-12789_r	4.40909	1	RXN-16588	3.28824	NIL	RXN-11318	3.32188	3	RXN-18247	3.53906	2	RXN-21331	3.60318	NIL	GLYCOSYLCERAMIDASE-RXN	3.60709	3	AMYGDALIN-BETA-GLUCOSIDASE-RXN	3.59822	3	RXN-14689	3.75889	1	RXN-19335	3.61823	2	LYSOPHOSPHOLIPASE-RXN	3.31718	3	PYRUVFORMLY-RXN_r	3.16406	2	RXN-20340	3.39283	2	RXN-19356
	RXN-17395	3.25789	1	RXN-17395	3.25789	1	GCVMULTI-RXN_r	4.53286	NIL	1.1.1.152-RXN_r	4.60965	1	RXN-16215	4.41064	NIL	RXN-11187	3.29266	2	RXN-8015	3.32411	3	RXN-18260	3.54084	2	RXN-14432	3.60355	2	RXN-21192	3.61283	NIL	RXN-17138	3.60664	1	RXN0-5507	3.76374	4	NAPHTHOATE-SYN-RXN	3.6197	4	RXN-12496	3.31764	5	RXN-12363	3.17956	2	RXN-20332	3.39283	2	RXN3O-130
	RXN-19861	3.26387	NIL	RXN-19861	3.26387	NIL	RXN-13443	4.5464	1	RXN-17004	4.60968	NIL	RXN-15024	4.43897	NIL	RXN-13424	3.29336	NIL	RXN-12364	3.32659	NIL	RXN-8731	3.54112	3	RXN-11802	3.60389	2	RXN-17832	3.61614	3	RXN-18226	3.61008	3	RXN0-4641_f	3.76413	4	COBINPGUANYLYLTRANS-RXN	3.61991	2	RXN-10840	3.31777	NIL	RXNQT-4169	3.21504	2	RXN-20348	3.39283	2	RXN-19188
	RXN-13179	3.26405	1	RXN-13179	3.26405	1	RXN-16755	4.54764	NIL	RXN-9578	4.61074	NIL	RXN-20779	4.44111	NIL	RXN-4221	3.29367	NIL	3.5.1.92-RXN	3.33483	3	RXN-14980	3.54229	3	RXN-14267	3.60716	3	OLIGOGALACTURONIDE-LYASE-RXN	3.61726	4	RXN-13210	3.61607	NIL	RXN0-4641_r	3.76413	4	RXN-17238	3.62126	NIL	RXN-12356	3.32041	3	RXN-14462	3.21504	NIL	RXN-20384	3.39283	2	RXN-14291
	RXN-19978	3.26413	NIL	RXN-19978	3.26413	NIL	RXN-12971	4.55022	1	RXN-16262	4.62125	1	ACYLGLYCERONE-PHOSPHATE-REDUCTASE-RXN	4.44333	1	RXN-12496	3.29482	5	RXN-12026	3.33705	NIL	RXN-16511	3.54955	NIL	RXN-17532	3.60863	NIL	RXN-13630	3.61925	NIL	RXN-20544	3.62398	3	RXN66-496	3.76577	3	RXN-9664	3.62621	5	RXN-2222	3.33047	NIL	RXNQT-4172	3.21504	2	RXN-20336	3.39283	2	RXN-16310
	1.5.1.27-RXN_f	3.26498	1	1.5.1.27-RXN_f	3.26498	1	RXN-19429	4.57167	1	RXN-20132	4.62837	NIL	RXN-16479	4.44385	1	RXN-20042	3.29552	NIL	CYTDEAM-RXN	3.33964	3	RXN-13693	3.55322	3	RXN-13166	3.60989	NIL	AMYGDALIN-BETA-GLUCOSIDASE-RXN	3.63004	3	GALPMUT-RXN_f	3.62534	5	RXN-18377	3.77772	4	RXN-10029_f	3.62973	1	RXN-19755	3.33163	NIL	RXNQT-4175	3.21504	2	RXN-20385	3.39283	2	RXN-19335
	1.5.1.27-RXN_r	3.26498	1	1.5.1.27-RXN_r	3.26498	1	R606-RXN	4.59195	NIL	RXN-8795	4.63754	NIL	RXN-12687	4.45967	1	ALPHA-PINENE-OXIDE-DECYCLASE-RXN_f	3.29653	5	RXNQT-4363	3.34256	2	RXN-8476	3.55551	2	RXN-10930	3.61045	NIL	RXN-14430	3.63255	1	GALPMUT-RXN_r	3.62534	5	RXN-17506_f	3.78616	3	RXN-10029_r	3.62973	1	RXN-12718	3.33369	3	RXN-18197_f	3.21504	2	RXN-20344	3.39283	2	RXN-4314
	1.1.1.247-RXN_f	3.26609	1	1.1.1.247-RXN_f	3.26609	1	CORTISONE-ALPHA-REDUCTASE-RXN	4.60356	1	RXN66-479	4.63764	1	RXN-9065	4.49324	NIL	ALPHA-PINENE-OXIDE-DECYCLASE-RXN_r	3.29653	5	RXN-8073	3.3427	NIL	RXN-18661	3.55644	2	RXN-19299	3.61419	2	RXN-17842	3.63334	NIL	RXN-10009	3.6254	2	RXN-17506_r	3.78616	3	RXN-8810	3.63212	2	RXN-12675_f	3.33513	5	RXN-18197_r	3.21504	2	RXN18C3-37	3.39405	NIL	RXN-20645
	1.1.1.247-RXN_r	3.26609	1	1.1.1.247-RXN_r	3.26609	1	CORTISONE-BETA-REDUCTASE-RXN_f	4.60356	1	RXN-20995	4.64338	1	RXN-9276	4.49541	1	RXN-16922	3.29874	NIL	RXN-14858	3.35109	NIL	PPGPPSYN-RXN	3.55695	3	AMYGDALIN-BETA-GLUCOSIDASE-RXN	3.61501	3	RXN-19047	3.63529	NIL	RXN-14430	3.62608	1	RXN-13252	3.78828	4	RXN0-3521	3.6322	2	RXN-12675_r	3.33513	5	RXNQT-4166	3.21504	2	RXN-15080	3.40259	NIL	RXN-12330
	RXN-14017	3.27159	NIL	RXN-14017	3.27159	NIL	CORTISONE-BETA-REDUCTASE-RXN_r	4.60356	1	RXN-15799	4.64742	1	RXN-13660	4.52964	NIL	RXN-17532	3.30175	NIL	RXN-8017	3.35177	NIL	RXN-21328	3.56012	NIL	RXN-19301	3.61535	2	RXN-14429	3.64111	3	RXN-19315	3.62769	3	RXN-14338	3.7968	2	RXN-19336	3.63736	NIL	RXN-17683	3.33601	NIL	RXN18C3-41	3.21985	NIL	RXN-1381	3.41075	2	RXN-19191
	RXN-4229	3.2721	NIL	RXN-4229	3.2721	NIL	RXN-12940	4.60841	NIL	RXN-8796	4.65046	NIL	RXN-9484	4.54278	1	ADDALT-RXN	3.30403	3	PENICILLIN-AMIDASE-RXN	3.35512	3	RXN-18250	3.57436	2	4.2.2.15-RXN	3.61569	4	RXN-8666	3.64625	1	RXN-17900	3.62952	NIL	2.3.1.72-RXN	3.80337	2	RXN-17213	3.63746	NIL	RXN-13938_f	3.33825	NIL	RXN-18333	3.23194	NIL	RXN-9449	3.41575	NIL	RXN-20145
	RXN-15855	3.2779	1	RXN-15855	3.2779	1	7-ALPHA-HYDROXYSTEROID-DEH-RXN	4.62075	1	RXN-16034	4.66243	1	RXN-9483	4.54278	1	R581-RXN	3.30822	4	RXN-10846	3.36277	4	RXN-12320	3.57559	2	RXN-9494	3.61639	4	STREPTOMYCIN-3-ADENYLYLTRANSFERASE-RXN	3.64704	2	2.5.1.19-RXN_f	3.63262	2	RXN-17829_f	3.8038	NIL	RXN-13824	3.64654	NIL	RXN-13938_r	3.33825	NIL	2-METHYLCITRATE-SYNTHASE-RXN_f	3.24134	2	RXN18C3-41	3.41931	NIL	RXN-12860
	RXN-9495	3.28181	NIL	RXN-9495	3.28181	NIL	RXN-12968	4.63475	1	RXN-15434	4.67168	1	RXN-13749	4.54766	1	RXN-21231	3.31052	1	RXN-20735	3.36478	3	RXN-18246	3.58062	2	RXN-16344	3.62057	1	RXN0-4641_f	3.64752	4	2.5.1.19-RXN_r	3.63262	2	RXN-17829_r	3.8038	NIL	RXN-11469	3.64662	3	RXN-10769	3.34138	3	2-METHYLCITRATE-SYNTHASE-RXN_r	3.24134	2	RXN-18568	3.42957	2	RXN0-7066
	RXN-5482	3.28638	NIL	RXN-5482	3.28638	NIL	RXN-15027	4.63585	NIL	1.1.1.52-RXN_f	4.67646	1	RXN-9087	4.5524	1	CYPRIDINA-LUCIFERIN-2-MONOOXYGENASE-RXN	3.31262	1	RXN-13210	3.36612	NIL	ATP-ADENYLYLTRANSFERASE-RXN_f	3.58461	2	RXN-18222_f	3.6218	3	RXN0-4641_r	3.64752	4	RXN-16788	3.63775	3	2.3.1.98-RXN	3.80462	2	RXN-8766	3.64721	2	RXN0-743	3.34277	5	ARALKYLAMINE-N-ACETYLTRANSFERASE-RXN_f	3.25681	2	RXN-17703	3.43531	3	RXN-15681
	11-BETA-HYDROXYSTEROID-DEHYDROGENASE-RXN_f	3.29014	1	11-BETA-HYDROXYSTEROID-DEHYDROGENASE-RXN_f	3.29014	1	RXN-12994	4.6386	1	1.1.1.52-RXN_r	4.67646	1	R218-RXN	4.5578	NIL	RXN-2222	3.31999	NIL	RXN-10852	3.36823	NIL	ATP-ADENYLYLTRANSFERASE-RXN_r	3.58461	2	RXN-18222_r	3.6218	3	RXN-15789	3.65194	NIL	RXN-18222_f	3.64102	3	2.4.1.67-RXN_f	3.81671	2	RXN-14633	3.64789	3	RXN-7686	3.34427	1	ARALKYLAMINE-N-ACETYLTRANSFERASE-RXN_r	3.25681	2	RXN-13442	3.46149	NIL	RXN-19351
	11-BETA-HYDROXYSTEROID-DEHYDROGENASE-RXN_r	3.29014	1	11-BETA-HYDROXYSTEROID-DEHYDROGENASE-RXN_r	3.29014	1	RXN-17387	4.65071	1	RXN-2401	4.68672	1	1.5.1.27-RXN_f	4.55922	1	RXN8J2-2	3.32313	NIL	NICOTINE-DEHYDROGENASE-RXN	3.36977	1	RXN-19253_f	3.58894	3	RXN-16934	3.62441	NIL	RXN-17532	3.65438	NIL	RXN-18222_r	3.64102	3	2.4.1.67-RXN_r	3.81671	2	RXN-21073	3.65498	NIL	RXN-18497	3.34478	2	RXN-21324	3.29194	NIL	RXN-7852	3.46192	2	RXN0-5208
	RXN-9796	3.29454	1	RXN-9796	3.29454	1	RXN-15229	4.65501	NIL	RXN-14668	4.69096	NIL	1.5.1.27-RXN_r	4.55922	1	DIMETHYLARGININASE-RXN	3.32681	3	RXN-18344	3.37103	NIL	RXN-19253_r	3.58894	3	RXN-18377	3.62969	4	RXN-12265	3.65577	3	3.2.1.92-RXN	3.64548	3	RXN-11502	3.81846	NIL	UDP-NACMURALGLDAPLIG-RXN	3.65768	6	RXN-13182	3.345	3	RXN18C3-37	3.35598	NIL	RXN-2006	3.46531	NIL	RXN-19336
	1.5.1.32-RXN	3.29877	1	1.5.1.32-RXN	3.29877	1	RXN-16020	4.65575	1	RXN-14830	4.69437	1	RXN-16416	4.56091	NIL	3.1.1.47-RXN	3.3273	3	RXN-7892	3.37981	NIL	RXN-16512_f	3.59222	3	RXN-19875	3.63044	NIL	RXN-21196	3.66002	NIL	GLUTAMIDOTRANS-RXN	3.64861	4	ATPPHOSPHORIBOSYLTRANS-RXN_f	3.82043	2	2.3.1.91-RXN	3.65784	2	RXN-15739	3.34538	NIL	RXN-16012	3.36101	NIL	RXN-14835_f	3.48619	2	RXN-19166
	RXN-4224	3.30485	NIL	RXN-4224	3.30485	NIL	RXN-17231	4.65856	NIL	RXN-11982	4.69671	NIL	RXN-9802	4.56091	NIL	RXN0-7143	3.32968	NIL	RXN-19972	3.38539	NIL	RXN-16512_r	3.59222	3	RXN-21192	3.63546	NIL	RXN-19043	3.66241	NIL	RXN-19051	3.65287	4	ATPPHOSPHORIBOSYLTRANS-RXN_r	3.82043	2	RXN-15945	3.66264	2	RXN-12663	3.34868	NIL	ACETYL-COA-HYDROLASE-RXN	3.3691	3	RXN-14835_r	3.48619	2	RXN-5467
	RETINOL-DEHYDROGENASE-RXN_f	3.306	1	RETINOL-DEHYDROGENASE-RXN_f	3.306	1	RXN-14493	4.67542	1	RXN-19408	4.7179	NIL	RXN-16164	4.57232	NIL	RXN-10910	3.33808	1	RXN-6321	3.39513	NIL	RXN-12177	3.59222	3	RXN0-4181	3.63891	3	RXN0-5123	3.66786	NIL	RXN-13630	3.65857	NIL	PRUNASIN-BETA-GLUCOSIDASE-RXN	3.82521	3	RXN-12843	3.66341	5	ALPHA-PINENE-OXIDE-DECYCLASE-RXN_f	3.35456	5	RXN-12573	3.40077	4	RXN-19971	3.50162	NIL	RXN-5466
	RETINOL-DEHYDROGENASE-RXN_r	3.306	1	RETINOL-DEHYDROGENASE-RXN_r	3.306	1	RXN-12705	4.69672	1	RXN-17967	4.72372	1	RXN-15026	4.57294	NIL	RXN-14113	3.34577	3	RXN-10840	3.39574	NIL	RXN-14546	3.60108	2	RXN-16037_f	3.6442	NIL	GTP-CYCLOHYDRO-I-RXN	3.68644	3	RXN-19314	3.66019	3	GLUTAMIDOTRANS-RXN	3.83075	4	RXN-15805	3.6669	4	ALPHA-PINENE-OXIDE-DECYCLASE-RXN_r	3.35456	5	RXN0-7345	3.4173	NIL	RXN-2005	3.52612	NIL	AICARSYN-RXN_f
	RXN-12562	3.306	NIL	RXN-12562	3.306	NIL	RXN-11186	4.6996	1	RXN-7659	4.74076	NIL	1.3.1.56-RXN	4.57373	1	RXN-13088	3.34582	1	2.8.1.5-RXN_f	3.39736	2	RXN0-1862	3.60124	2	RXN-16037_r	3.6442	NIL	RXN-11664	3.68865	3	RXN-9494	3.66586	4	TROPINESTERASE-RXN	3.83838	3	6.3.2.7-RXN	3.66857	6	ISOCHORMAT-RXN	3.35557	3	AMINOGLYCOSIDE-N3-ACETYLTRANSFERASE-RXN	3.43315	2	GLYCINE-N-BENZOYLTRANSFERASE-RXN	3.53469	2	AICARSYN-RXN_r
	RXN-12577	3.306	NIL	RXN-12577	3.306	NIL	RXN-10845	4.69995	1	RXN-15030	4.74123	NIL	RXN-16252	4.57596	NIL	AIRCARBOXY-RXN_f	3.34593	4	2.8.1.5-RXN_r	3.39736	2	RXN-9588	3.60497	NIL	RXN-14948	3.65198	5	RXN-14267	3.69069	3	RXN-21094	3.67874	NIL	RXN-17900	3.83946	NIL	R342-RXN	3.67177	6	RXN-20544	3.35624	3	DIAMACTRANS-RXN	3.43315	2	RXN-15669	3.53575	NIL	S-ADENOSYLHOMOCYSTEINE-DEAMINASE-RXN
	RXN-14743	3.308	NIL	RXN-14743	3.308	NIL	1.1.1.176-RXN_f	4.70172	1	RXN-13945	4.74289	NIL	RXN-16216	4.58091	NIL	AIRCARBOXY-RXN_r	3.34593	4	RXN-7886	3.39742	NIL	RXN-18261	3.60545	2	RXN-9988	3.66038	2	RXN-19301	3.69171	2	RXN-12154	3.68092	NIL	RXN-15498	3.84051	NIL	RXN0-6254	3.67454	2	RXN-18451	3.36608	2	D-AMINO-ACID-N-ACETYLTRANSFERASE-RXN_f	3.43315	2	RXN-19905	3.56732	2	RXN-20979
	R203-RXN	3.30825	NIL	R203-RXN	3.30825	NIL	1.1.1.176-RXN_r	4.70172	1	RXN-19816	4.75698	1	RXN-19871	4.58168	NIL	RXN-20738	3.35027	3	RXN-13340	3.40246	NIL	RXN-13696	3.60772	3	RXN-17045	3.66587	NIL	RXN-15945	3.69192	2	RXN-18072	3.68978	NIL	RXN-13630	3.84377	NIL	RXN-11458	3.67482	NIL	RXN-8152	3.36673	1	D-AMINO-ACID-N-ACETYLTRANSFERASE-RXN_r	3.43315	2	2.3.1.107-RXN	3.56899	2	RXN-12819
	RXN-13341	3.32276	1	RXN-13341	3.32276	1	RXN-14484	4.70344	1	RXN-16164	4.75983	NIL	RXN-15048	4.58917	1	BETA-ALANYL-COA-AMMONIA-LYASE-RXN_f	3.3559	4	RXN-12495	3.40288	5	RXN-13813	3.61207	NIL	RXN-8793	3.66789	4	RXN-15376_f	3.69478	2	RXN0-5227	3.69857	3	RXN-16934	3.84758	NIL	RXN-18857	3.67725	3	RXN-7810	3.36704	2	RXN-19733	3.43315	2	RXN-20228	3.56961	2	RXN-21171
	RXN-14016	3.32399	NIL	RXN-14016	3.32399	NIL	RXN-15495	4.71603	NIL	RXN-4224	4.77551	NIL	RXN-14532	4.58917	1	BETA-ALANYL-COA-AMMONIA-LYASE-RXN_r	3.3559	4	THIOSULFATE-SULFURTRANSFERASE-RXN	3.40378	2	RXN-15278	3.62146	2	RXN-19707	3.67002	3	RXN-15376_r	3.69478	2	RXN-18377	3.70309	4	RXN18C3-16	3.85008	NIL	RXN-12230	3.67803	2	RXN-14695	3.36762	1	N6-HYDROXYLYSINE-O-ACETYLTRANSFERASE-RXN	3.43315	2	RXN-20220	3.56961	2	RXN-15502
	RXN-16546	3.32572	NIL	RXN-16546	3.32572	NIL	RXN-12926	4.71958	1	RXN-16406	4.8013	NIL	RXN-14184_f	4.58917	1	RXN-15638	3.35707	NIL	1.21.3.1-RXN	3.4054	1	RXN-21215	3.62563	NIL	RXN-17900	3.672	NIL	RXN-8770	3.7013	3	RXN-11663	3.70722	2	2.4.2.12-RXN	3.8506	2	3.6.1.41-RXN	3.68506	3	AIRCARBOXY-RXN_f	3.36807	4	RXN-17081	3.43315	NIL	RXN-19396	3.56961	2	RXN-12611
	RXN-16479	3.32685	1	RXN-16479	3.32685	1	RXN-20439	4.76262	1	RXN-9307	4.8024	NIL	RXN-14184_r	4.58917	1	P-PANTOCYSDECARB-RXN	3.3589	4	1.2.3.14-RXN	3.40831	1	RXN-11806	3.62945	NIL	RXN-15790	3.67236	NIL	RXN-12230	3.70196	2	RXN-19875	3.71606	NIL	RXN-8731	3.85508	3	RXN0-1461	3.68891	1	AIRCARBOXY-RXN_r	3.36807	4	2.3.1.80-RXN	3.43315	2	THIOESTER-RXN	3.5707	3	RXN-19014
	RXN-17341_f	3.33337	1	RXN-17341_f	3.33337	1	RXN-12689	4.78243	1	RXN-15029	4.80668	NIL	RXN-9245	4.59382	1	RXN-19584	3.36093	NIL	RXN-16966	3.41088	1	RXN-8666	3.63161	1	GLUTAMIDOTRANS-RXN	3.67383	4	RXN-19322	3.70466	3	4.2.2.15-RXN	3.7172	4	MALTOSE-6-PHOSPHATE-GLUCOSIDASE-RXN	3.85617	3	RXN-16750	3.6898	2	RXN-18576	3.376	4	RXN-20153	3.43315	2	RXN-10699	3.5902	2	RXNMETA-12671
	RXN-17341_r	3.33337	1	RXN-17341_r	3.33337	1	METHYLENETHFDEHYDROG-NADP-RXN_f	4.79887	1	RXN-13660	4.81887	NIL	RXN-14743	4.59525	NIL	RXN-10767	3.36222	3	RXN-8987	3.41232	2	RXN-1444	3.63356	3	RXN-19298	3.6745	2	RXN-8793	3.70693	4	HISTCYCLOHYD-RXN	3.71841	3	6-PHOSPHO-BETA-GLUCOSIDASE-RXN	3.85617	3	RXN-13275	3.69051	2	RXN-18180	3.3792	NIL	RXN-12710	3.43315	2	RXN-17071	3.59429	NIL	RXN-16937
	1.5.1.7-RXN	3.33802	1	1.5.1.7-RXN	3.33802	1	METHYLENETHFDEHYDROG-NADP-RXN_r	4.79887	1	RXN-16754	4.84216	NIL	RXN-21341	4.61982	1	5.4.99.14-RXN	3.36267	5	RXN-7893	3.41691	NIL	RXN-12024	3.64755	3	RXN-19306	3.67894	2	RXN-4314	3.70979	NIL	RXNQT-4191	3.7218	3	LACTOSE6P-HYDROXY-RXN	3.85617	3	DOLICHYL-PHOSPHATASE-RXN	3.69668	3	RXN-18181	3.3792	NIL	RXN-13678	3.43315	2	RXN18C3-40	3.6069	NIL	RXN-19159
	RXN-5041	3.34038	NIL	RXN-5041	3.34038	NIL	RXN-19870	4.83385	NIL	RXN-16931	4.84494	NIL	FCLREDUCT-RXN	4.62001	NIL	RXN-16873	3.3646	NIL	RXN-12496	3.41838	5	RXN-19333	3.64847	NIL	RXN-10009	3.67945	2	FADSYN-RXN_f	3.71335	2	RXN-19253_f	3.72571	3	GALPMUT-RXN_f	3.8563	5	RXN-19253_f	3.69689	3	RXN-10767	3.38189	3	RXN-8694	3.44418	2	RXN-20424	3.62464	NIL	RXN-11802
	RXN-16754	3.34096	NIL	RXN-16754	3.34096	NIL	RXN-9848	4.85826	NIL	RXN-16656	4.86028	1	1.1.1.271-RXN	4.62001	1	PHLORETIN-HYDROLASE-RXN	3.36471	3	RXN-14129	3.419	3	PANTEPADENYLYLTRAN-RXN	3.64987	2	URPHOS-RXN_f	3.68113	2	FADSYN-RXN_r	3.71335	2	RXN-19253_r	3.72571	3	GALPMUT-RXN_r	3.8563	5	RXN-19253_r	3.69689	3	ARYLDIALKYL-PHOSPHATASE-RXN	3.38359	3	3-HYDROXYISOBUTYRYL-COA-HYDROLASE-RXN	3.45249	3	RXN-19800	3.63205	2	RXN-19975
	RXN-14860	3.34761	NIL	RXN-14860	3.34761	NIL	RXN-21224	4.87024	1	FCLREDUCT-RXN	4.86617	NIL	RXN-9495	4.62621	NIL	RXN-11903	3.37064	5	RXN-8028	3.41918	5	RXN-12236	3.65282	NIL	URPHOS-RXN_r	3.68113	2	RXN-17809	3.71779	4	GDPMANDEHYDRA-RXN	3.72918	4	3.2.1.48-RXN	3.86248	3	RXN-15502	3.69726	NIL	1.21.3.1-RXN	3.38365	1	RXN-13721	3.45249	3	2.3.1.154-RXN	3.6476	2	3.4.17.11-RXN
	RXN-10899	3.37849	NIL	RXN-10899	3.37849	NIL	RXN-9799	4.89608	NIL	1.1.1.271-RXN	4.86617	1	RXN-20418	4.63046	1	RXN-8342	3.37076	2	RXN-12613	3.42151	3	RXN-18251	3.65332	2	RXN-8255	3.68168	NIL	TROPINESTERASE-RXN	3.71962	3	RXN0-5398_f	3.73184	4	RXN-761	3.86281	2	RXN-13532	3.69937	NIL	RXN-15668	3.38541	NIL	RXN18C3-45	3.47673	NIL	7KAPSYN-RXN	3.64961	2	RXN-16498
	RXN-10900	3.37849	NIL	RXN-10900	3.37849	NIL	RXN-12925	4.93673	1	RXN-14245	4.86883	1	RXN-5482	4.63165	NIL	GLUTACONYL-COA-DECARBOXYLASE-RXN	3.3721	NIL	RXNN-404	3.43292	3	RXN-18257	3.65668	2	RXN-9991	3.68684	2	RXN-16487	3.73232	NIL	RXN0-5398_r	3.73184	4	RXN-13177	3.86941	3	NACGLCTRANS-RXN_f	3.69974	2	RXN-17998	3.38568	NIL	RXN-21228	3.4849	2	RXN-13112	3.65048	2	RXN-19572
	RXN-10898	3.37849	NIL	RXN-10898	3.37849	NIL	RXN-17111	5.00421	1	RXN-12687	4.88563	1	CHOLESTENONE-5-BETA-REDUCTASE-RXN_f	4.65028	1	RXN-15682	3.37669	3	RXN-7895	3.43296	NIL	RXN-13821	3.65683	NIL	RXN-17737	3.68751	3	RXN-11183	3.73454	3	RXN-17832	3.73189	3	RXN-16037_f	3.87353	NIL	NACGLCTRANS-RXN_r	3.69974	2	RXN-15498	3.38607	NIL	RXN-21225	3.4896	2	RXN-11254	3.65156	NIL	RXN-13868
	RXN-10901	3.37849	NIL	RXN-10901	3.37849	NIL	RXN-13309	5.00421	1	RXN-12789_f	4.8951	1	CHOLESTENONE-5-BETA-REDUCTASE-RXN_r	4.65028	1	RXN-17519	3.37694	1	BIOTINIDASE-RXN	3.43475	3	4.2.3.12-RXN	3.66248	4	RXN-16788	3.69131	3	RXN66-496	3.73827	3	3.2.1.102-RXN	3.73683	3	RXN-16037_r	3.87353	NIL	RXN-8976	3.70369	2	RXN-20725	3.38728	3	RXN-14394	3.51024	2	ANTHRANILATE-N-BENZOYLTRANSFERASE-RXN	3.65466	2	RXN-12843
	RXN-15079	3.3796	NIL	RXN-15079	3.3796	NIL	RXN-20343	5.00421	1	RXN-12789_r	4.8951	1	RXN-15079	4.66097	NIL	RXN-15498	3.3784	NIL	CREATININE-DEAMINASE-RXN	3.4422	3	RXN0-5507	3.66287	4	RXN0-7092	3.69562	NIL	RXN-16938	3.7407	3	RXN-16344	3.73829	1	RXN-14863	3.88497	3	RXN-13648	3.71008	2	RXN8J2-2	3.38749	NIL	RXN-17799	3.51024	2	RXN-18624	3.66484	2	RXN-13826
	RXN0-6677	3.38391	NIL	RXN0-6677	3.38391	NIL	RXN-20339	5.00421	1	RXN-7591	4.90051	NIL	RXN-19993	4.66397	NIL	ADCLY-RXN	3.37985	4	RXN-10930	3.44336	NIL	RXN-9999_f	3.66407	2	RXN-21196	3.70945	NIL	RXN-15742	3.74632	NIL	RXN-4303	3.7417	2	RXN-17042	3.88935	NIL	RXN-9630	3.71417	5	RXN-20436	3.39339	5	RXN-16063	3.62833	3	RXN-11800	3.67524	NIL	RXN-15964
	RXN-5282	3.38618	NIL	RXN-5282	3.38618	NIL	ACYL-COA-DEHYDROGENASE-NADP+-RXN	5.00421	1	RXN-7658	4.90258	NIL	RXN-20430	4.6708	1	RXN-1404	3.38118	3	RXN-20733	3.44622	3	RXN-9999_r	3.66407	2	CEPHALOSPORIN-C-DEACETYLASE-RXN	3.71304	3	RXN-19310	3.74637	3	RXN-4305	3.75487	2	RXN-13182	3.90006	3	RXN-20419	3.71423	NIL	RXN-12266_f	3.39923	NIL	RXN-14277	3.68538	2	RXN-17710	3.67602	2	RXN-13938_f
	RXN-11826_f	3.3949	1	RXN-11826_f	3.3949	1	RXN-20347	5.00421	1	RXN-13389	4.9026	NIL	RXN-12673	4.67177	1	RXN-10711	3.38262	3	MANDELONITRILE-LYASE-RXN	3.44845	4	RXN-15961	3.66888	NIL	RXN-12154	3.71738	NIL	RXN-12153	3.74696	NIL	RXN-14704	3.75504	3	RXN-11501	3.90186	3	ISONOCARDICIN-SYNTHASE-RXN	3.7161	2	RXN-12266_r	3.39923	NIL	RXN18C3-43	4.01541	NIL	RXN18C3-36	3.67892	NIL	RXN-13938_r
	RXN-11826_r	3.3949	1	RXN-11826_r	3.3949	1	RXN-20435	5.03218	1	RXN-13749	4.90739	1	RXN-12939_f	4.67524	1	RXN-11099	3.38292	NIL	RXN-16225	3.4545	3	RXN-10846	3.67191	4	RXN-18563	3.71789	4	RXN-16344	3.74737	1	RXN-4314	3.75736	NIL	RXN-15734	3.9039	2	RXN-17844	3.7161	2	3.5.1.26-RXN	3.40161	3	RXN18C3-24	4.04345	NIL	2.3.1.150-RXN	3.67903	2	RXN-12263
	RXN-12687	3.41531	1	RXN-12687	3.41531	1	RXN-12886	5.03842	1	RXN-4229	4.93299	NIL	RXN-12939_r	4.67524	1	RXN-18933	3.38529	3	R310-RXN	3.45531	4	RXN-14609	3.67583	NIL	1TRANSKETO-RXN_f	3.71937	2	RXN-19320	3.7475	3	H2PTEROATESYNTH-RXN	3.76467	2	RXN-16612_f	3.90807	3	RXN-11485	3.71721	2	RXN-19129	3.40162	1	RXN18C3-29	4.07517	NIL	RXN-16658	3.69206	NIL	RXN-11535
	PREPHENATE-DEHYDROGENASE-NADP+-RXN	3.41736	1	PREPHENATE-DEHYDROGENASE-NADP+-RXN	3.41736	1	1.2.1.66-RXN	5.06277	1	RXN-15114	4.93945	NIL	RXN-13341	4.67901	1	R608-RXN	3.38727	3	RXN-19837	3.45664	NIL	RXN-18060	3.67648	NIL	1TRANSKETO-RXN_r	3.71937	2	RXN-4303	3.74885	2	RXN-17061	3.77085	NIL	RXN-16612_r	3.90807	3	RXN-8857	3.71748	NIL	RXN-12655	3.40186	NIL	RXN-6384	4.10489	3	GLUTAMINE-N-ACYLTRANSFERASE-RXN	3.69217	2	RXN-15734
	1.3.1.56-RXN	3.42077	1	1.3.1.56-RXN	3.42077	1	RXN-15049	5.06848	NIL	RXN-16479	4.94205	1	1.1.1.51-RXN	4.67913	1	RXN-14689	3.38829	1	RXN-5081	3.459	NIL	RXN-11133	3.67657	3	RXN0-5359	3.73078	2	RXN-19326	3.75094	3	RXN-14263	3.77541	3	RXN-10846	3.909	4	RXN-8106	3.72157	1	RXN-18848	3.40291	NIL	RXN-17041	4.14958	NIL	RXN-11246	3.70488	2	R346-RXN
	1.3.1.60-RXN_f	3.42104	1	1.3.1.60-RXN_f	3.42104	1	R321-RXN	5.0812	1	RXN-15048	4.94276	1	RXN-14018	4.70494	NIL	H2PTEROATESYNTH-RXN	3.38962	2	RXN-12025	3.4598	NIL	RXN-18069_f	3.68038	NIL	URA-PHOSPH-RXN_f	3.73096	2	RXN-18841	3.75447	NIL	RXN-19255	3.7834	NIL	3.2.1.102-RXN	3.93413	3	RXN-19744	3.73236	NIL	RXN-14844	3.40578	5	RXN-7697	4.19384	2	RXN-904	3.70653	NIL	RXN-15494
	1.3.1.60-RXN_r	3.42104	1	1.3.1.60-RXN_r	3.42104	1	RXN-17225	5.12109	NIL	RXN-14532	4.94276	1	RXN-19861	4.72098	NIL	3.4.23.38-RXN	3.39619	3	RXN-16711	3.46451	4	RXN-18069_r	3.68038	NIL	URA-PHOSPH-RXN_r	3.73096	2	RXN-18847	3.75447	NIL	RXN0-7001	3.78466	3	RXN-17726	3.93593	NIL	RXN-16571	3.73278	NIL	RXN-16709	3.40683	NIL	RXN-20386	4.19646	2	RXN-16661	3.70675	NIL	RXN-12042
	RXN-3941	3.42742	NIL	RXN-3941	3.42742	NIL	RXN-16254	5.12382	NIL	RXN-14184_f	4.94276	1	RXN-20421	4.72621	1	3.4.23.39-RXN	3.39619	3	RXN-15016	3.46464	NIL	RXN-18072	3.68066	NIL	RXN-16086	3.733	NIL	RXN-19324	3.75559	3	RXN0-5359	3.78521	2	RXN-10034	3.93752	3	RXN-11351	3.73377	3	RXN-16710	3.40683	NIL	RXN-20340	4.19646	2	RXN-17039	3.71029	NIL	RXN-14400
	RXN-20132	3.43071	NIL	RXN-20132	3.43071	NIL	RXN-10646	5.12531	NIL	RXN-14184_r	4.94276	1	CHLORDECONE-REDUCTASE-RXN_f	4.73421	1	RXN-15028	3.39743	NIL	1.8.3.5-RXN	3.47087	1	RXN-12366	3.68999	2	RXN-14430	3.74213	1	RXN-19323	3.75647	3	RXN-5841	3.78524	3	RXN-17388	3.94619	3	RXN-16903_f	3.73503	2	RXN-19543	3.40932	3	RXN-20332	4.19646	2	RXN-10708	3.72761	3	RXN-19744
	RXN-16442	3.43933	NIL	RXN-16442	3.43933	NIL	RXN-12151	5.15307	NIL	RXN-12689	4.94803	1	CHLORDECONE-REDUCTASE-RXN_r	4.73421	1	3-OXOADIPATE-ENOL-LACTONASE-RXN	3.40232	3	RXN-19136	3.47161	NIL	RXN-13518	3.69413	NIL	RXN-11459	3.74387	NIL	R346-RXN	3.75835	3	RXN-8255	3.78636	NIL	RXN0-5187	3.94738	3	RXN-16903_r	3.73503	2	RXN-8382	3.41005	2	RXN-20348	4.19646	2	RXN-18560	3.73067	2	RXN-8666
	RXN-18600	3.44123	1	RXN-18600	3.44123	1	RXN0-6444	5.15313	1	RXN-13382	4.95129	NIL	OROTATE-REDUCTASE-NADPH-RXN_f	4.74158	1	R-6-HYDROXYNICOTINE-OXIDASE-RXN	3.40257	1	ARYL-ACYLAMIDASE-RXN	3.47407	3	NAD+-ADP-RIBOSYLTRANSFERASE-RXN_f	3.69432	2	RXN-19315	3.7497	3	PYRIMSYN1-RXN	3.76202	4	RXN-20673	3.78663	NIL	2.4.1.213-RXN	3.95154	2	RXN-16570	3.73503	2	RXN0-5409	3.41156	NIL	RXN-20384	4.19646	2	RXN-18555	3.73067	2	RXN-20419
	RXN-18601	3.44123	1	RXN-18601	3.44123	1	RXN-11929	5.17208	1	UGD-RXN	4.97214	1	OROTATE-REDUCTASE-NADPH-RXN_r	4.74158	1	S-6-HYDROXYNICOTINE-OXIDASE-RXN	3.40257	1	RXN-18721	3.47607	NIL	NAD+-ADP-RIBOSYLTRANSFERASE-RXN_r	3.69432	2	RXN-15654	3.75033	NIL	RXN-19229	3.76516	2	RXN-15682	3.78812	3	ALPHAGALACTOSID-RXN	3.95466	3	RETINYL-PALMITATE-ESTERASE-RXN	3.73763	3	RXN-14670	3.41653	1	RXN-20336	4.19646	2	RXN18C3-113_f	3.73124	NIL	RXN-12610
	1.3.1.49-RXN_f	3.44416	1	1.3.1.49-RXN_f	3.44416	1	1.5.1.9-RXN	5.19344	1	RXN-13812	4.97504	1	RXN-12932	4.74493	NIL	RXN1ZN3-9	3.40285	NIL	RXN-7883	3.47836	NIL	RXN-11789	3.69837	2	RXN-4314	3.7551	NIL	RXN-17138	3.76529	1	RXN-16649	3.79505	3	RXN-8282_f	3.95569	NIL	3.1.1.64-RXN	3.73763	3	RXN-13643	3.41856	1	RXN-20385	4.19646	2	RXN18C3-113_r	3.73124	NIL	RXN-19167
	1.3.1.49-RXN_r	3.44416	1	1.3.1.49-RXN_r	3.44416	1	RXN-13191	5.20825	1	1.1.1.252-RXN_f	4.97644	1	RXN-14829	4.7454	1	RXN-7973	3.40303	1	RXN-21192	3.47855	NIL	RXN-18254	3.70082	2	RXN0-5398_f	3.75575	4	RXN-16086	3.76545	NIL	RXN-13165	3.79862	1	RXN-8282_r	3.95569	NIL	RXN-14038	3.73763	3	RXN-8666	3.41874	1	RXN-20344	4.19646	2	RXN-11221	3.74507	2	RXN-12744
	RXN-17535	3.44848	NIL	RXN-17535	3.44848	NIL	1.5.1.7-RXN	5.29078	1	1.1.1.252-RXN_r	4.97644	1	TESTOSTERONE-17-BETA-DEHYDROGENASE-RXN	4.74891	1	TANNASE-RXN	3.40453	3	RXN-13907	3.48078	1	RXN-6261	3.70353	6	RXN0-5398_r	3.75575	4	RXN-19319	3.76612	3	RXN-19313	3.79915	3	RXN-19300	3.95698	2	BTUR2-RXN	3.73873	2	RXN-13681	3.42168	1	HYDROXYMETHYLGLUTARYL-COA-SYNTHASE-RXN_f	4.23539	2	RXN-17052	3.75668	NIL	RXN-17388
	RXN1UA-50	3.45337	1	RXN1UA-50	3.45337	1	2-HEXADECENAL-REDUCTASE-RXN	5.29134	1	RXN-19978	4.98304	NIL	RXN-15855	4.76544	1	DDT-DEHYDROCHLORINASE-RXN_f	3.40474	4	RXN66-62	3.4921	NIL	TEICHOICSYN5-RXN	3.70445	2	3.2.1.92-RXN	3.75776	3	RXN-13182	3.7754	3	RXN-17737	3.80974	3	RXN-9988	3.95833	2	RXN-13335_f	3.74235	4	RXN-7812	3.42807	2	HYDROXYMETHYLGLUTARYL-COA-SYNTHASE-RXN_r	4.23539	2	RXN-11220	3.76441	2	RXN-18344
	RXN-16439	3.45768	NIL	RXN-16439	3.45768	NIL	RXN-18384	5.32405	1	RXN-15053	5.00095	NIL	RXN-18003	4.76602	NIL	DDT-DEHYDROCHLORINASE-RXN_r	3.40474	4	RXN-14546	3.49302	2	RXN-17178	3.70678	NIL	RXN-15298	3.76462	4	RXN-21171	3.77869	NIL	RXN-16588	3.81214	NIL	RXN-10003	3.96088	2	RXN-13335_r	3.74235	4	X-METHYL-HIS-DIPEPTIDASE-RXN	3.43125	3	RXN-20431	4.24558	NIL	RXN-20427	3.77363	NIL	RXN-11029
	RXN-12939_f	3.45814	1	RXN-12939_f	3.45814	1	NADPH-DEHYDROGENASE-FLAVIN-RXN	5.32919	1	RXN-10924	5.0053	NIL	RXN-15057	4.77083	NIL	RXN-7947	3.41142	5	RXN-14197	3.49358	3	RXN-8473	3.70703	2	RXN-18072	3.76693	NIL	AICARSYN-RXN_f	3.78696	4	RXN-15742	3.81476	NIL	RXN-17083	3.96088	NIL	TRANS-PENTAPRENYLTRANSFERASE-RXN	3.74578	2	MIMOSINASE-RXN	3.43234	3	GLYCINE-N-BENZOYLTRANSFERASE-RXN	4.27429	2	RXN-21154	3.80121	NIL	RXN-19171
	RXN-12939_r	3.45814	1	RXN-12939_r	3.45814	1	1.6.4.9-RXN	5.34167	1	RXN-16416	5.00581	NIL	RXN-9159	4.78141	1	RXN-12393	3.41426	1	RXN-18223	3.49422	NIL	RXN-8284	3.70717	NIL	RXN-15682	3.76799	3	AICARSYN-RXN_r	3.78696	4	RXN-13252	3.81872	4	RXN-15028	3.96191	NIL	ECDYSONE-OXIDASE-RXN	3.74585	1	RXN-12913	3.43969	NIL	RXN-2005	4.29083	NIL	2.3.1.162-RXN_f	3.81948	2	RXN-15742
	RXN-7658	3.45838	NIL	RXN-7658	3.45838	NIL	RXN66-306	5.34291	1	RXN-9802	5.00581	NIL	RXN-9158	4.78141	1	PENICILLIN-AMIDASE-RXN	3.41435	3	RXN-16303	3.49432	3	2.4.1.67-RXN_f	3.7089	2	RXN0-963	3.77102	NIL	3.4.17.13-RXN	3.7873	3	RXN-14227	3.81891	3	RXN-14837	3.9628	2	RXN-17837	3.74892	2	RXN-18378	3.44327	4	3.1.2.23-RXN	4.29225	3	2.3.1.162-RXN_r	3.81948	2	RXN-14430
	1.5.1.19-RXN	3.46658	1	1.5.1.19-RXN	3.46658	1	RXN-16507	5.37458	NIL	RXN-19428	5.00713	1	BADEL6OXRED-RXN	4.78629	1	R362-RXN	3.41532	NIL	RXN-19740	3.49577	3	2.4.1.67-RXN_r	3.7089	2	CHORISMATE-SYNTHASE-RXN	3.77103	4	RXN-5467	3.78991	2	RXN-2222	3.8201	NIL	RXN-6242	3.96322	1	RXN0-262	3.75311	2	1.2.3.14-RXN	3.4442	1	RXN-8032_f	4.29308	NIL	RXN-17037	3.86483	NIL	RXN-9630
	RXN-13158	3.4693	1	RXN-13158	3.4693	1	RXN-13585	5.38121	1	RXN-11245	5.02648	1	RXN-16441_f	4.80627	NIL	RXN-12356	3.41802	3	RXN-7894	3.49677	NIL	RXN-12150	3.70941	NIL	GLYCOSYLCERAMIDASE-RXN	3.77316	3	RXN-5466	3.78991	2	RXNQT-4344	3.82691	NIL	RXN-13204	3.96427	3	RXN-8799	3.75477	NIL	RXN-15801	3.4498	1	RXN-8032_r	4.29308	NIL	RXN-12777	3.87187	NIL	RXN-9847
	OROTATE-REDUCTASE-NADH-RXN	3.46947	1	OROTATE-REDUCTASE-NADH-RXN	3.46947	1	RXN-20709	5.38648	1	ESTRADIOL-17-BETA-DEHYDROGENASE-RXN	5.05049	1	RXN-16441_r	4.80627	NIL	RXN-18221	3.42228	NIL	RXN-8911	3.49712	NIL	RXN-5472	3.70947	2	RXNQT-4191	3.77636	3	RXN-16251	3.79174	NIL	RXN-14948	3.82959	5	RXN-16251	3.96811	NIL	RXN-14291	3.7569	NIL	RXN-18484	3.44991	3	RXN-3641	4.31112	2	RXN-11366	3.89272	2	1.8.1.15-RXN
	1.5.1.9-RXN	3.47032	1	1.5.1.9-RXN	3.47032	1	1.1.1.288-RXN	5.39103	1	RXN-14743	5.05114	NIL	RXN-18104	4.81016	NIL	QUERCETIN-23-DIOXYGENASE-RXN	3.42269	1	R313-RXN	3.50048	4	RXN18C3-14	3.7098	3	RXN-14479	3.7771	NIL	HISTCYCLOHYD-RXN	3.79211	3	RXN-4313	3.83033	NIL	PYRIMSYN1-RXN	3.97519	4	RXN-8763	3.75764	3	RXN-14458	3.45171	2	RXN-11800	4.36842	NIL	RXN-15331	3.90638	NIL	4.2.1.107-RXN_f
	L-GULONATE-3-DEHYDROGENASE-RXN_f	3.47801	1	L-GULONATE-3-DEHYDROGENASE-RXN_f	3.47801	1	RXN-12445	5.41752	1	INDOLELACTATE-DEHYDROGENASE-RXN	5.05313	1	RXN66-342_f	4.83046	1	BENZOIN-ALDOLASE-RXN_f	3.42291	4	3.3.2.2-RXN	3.50191	3	RXN-18067	3.71182	NIL	RXN-19051	3.7781	4	RXN-15498	3.79504	NIL	RXN-14479	3.83236	NIL	RXN-11133	3.97566	3	RXN-13392	3.76114	NIL	RXN-4221	3.45215	NIL	RXN-16137	4.37168	2	2.3.1.166-RXN	3.9134	2	4.2.1.107-RXN_r
	L-GULONATE-3-DEHYDROGENASE-RXN_r	3.47801	1	L-GULONATE-3-DEHYDROGENASE-RXN_r	3.47801	1	RXN-16437	5.42005	NIL	RXN0-2042	5.05401	1	RXN66-342_r	4.83046	1	BENZOIN-ALDOLASE-RXN_r	3.42291	4	RXN-15979	3.50294	NIL	2.3.1.98-RXN	3.71241	2	RXN-19314	3.77838	3	RXN-8475	3.79658	2	RXN-14865	3.8335	3	RXN-14546	3.9834	2	4.1.3.26-RXN	3.76587	4	THI-P-SYN-RXN	3.45307	2	RXN18C3-25	4.37901	NIL	CHLORAMPHENICOL-O-ACETYLTRANSFERASE-RXN	3.93448	2	RXN0-3521
	RXN-13389	3.47809	NIL	RXN-13389	3.47809	NIL	RXN-8955	5.4371	1	RXN-12560	5.07047	1	RXN-7665	4.834	NIL	RXN-16762	3.42645	NIL	RXN-7947	3.50441	5	RXN-11075	3.71267	NIL	RXN-15930	3.788	NIL	RXN-8474	3.80029	2	RXN-19154	3.83379	NIL	RXN-14948	3.99176	5	RXN-15413	3.76623	NIL	GLYOXII-RXN	3.45375	3	RXN-14799	4.39827	2	RXN3DJ-35528	3.94646	2	RXN-8764
	RXN-17967	3.48045	1	RXN-17967	3.48045	1	RXN-9232	5.47853	1	RXN-16162	5.08893	NIL	1.1.1.149-RXN_f	4.83408	1	RXN-10895	3.43125	NIL	DIISOPROPYL-FLUOROPHOSPHATASE-RXN	3.50451	3	RXN-18066	3.71303	NIL	RXN-2222	3.79098	NIL	RXN-17837	3.8005	2	PRAISOM-RXN	3.84333	5	5.4.99.16-RXN_f	3.99698	5	RXN-19339	3.76895	2	RXN-9411	3.45491	NIL	RXN-14803	4.42347	2	RXN-18840	3.95434	3	2.3.1.103-RXN
	RXN-11566	3.48055	1	RXN-11566	3.48055	1	GDP-4-DEHYDRO-D-RHAMNOSE-REDUCTASE-RXN	5.48819	1	RXN-16169_f	5.08893	NIL	1.1.1.149-RXN_r	4.83408	1	RXN1G-2	3.4338	3	RXN-21196	3.50505	NIL	RXN-8205	3.71348	NIL	3.2.1.102-RXN	3.79651	3	RXN-12356	3.80225	3	RXN-21171	3.84421	NIL	5.4.99.16-RXN_r	3.99698	5	RXN-14605	3.7693	3	RXN-9410	3.45491	NIL	RXN-13098	4.45371	NIL	RXN-9939	3.96291	2	RXN-16171
	GLUCONATE-5-DEHYDROGENASE-RXN_f	3.48897	1	GLUCONATE-5-DEHYDROGENASE-RXN_f	3.48897	1	GDP-6-DEOXY-D-TALOSE-4-DEHYDROGENASE-RXN	5.48819	1	RXN-16169_r	5.08893	NIL	RXN-21377	4.84658	NIL	RXN-8028	3.43575	5	RXN-20092	3.51402	1	RXN-8471	3.72389	2	RXN-19255	3.79736	NIL	RXN-14615	3.80619	NIL	RXN-20788	3.85558	3	PRPPAMIDOTRANS-RXN_f	3.99874	2	RXN-16427	3.77006	2	RXN-16225	3.45493	3	RXN-8947	4.45776	2	RXN-9311	3.96918	3	GLYCOSYLCERAMIDASE-RXN
	GLUCONATE-5-DEHYDROGENASE-RXN_r	3.48897	1	GLUCONATE-5-DEHYDROGENASE-RXN_r	3.48897	1	RXN-16590	5.49179	NIL	RXN-905	5.0896	NIL	RXN-16438_f	4.8558	NIL	METHENYLTHFCYCLOHYDRO-RXN_f	3.43688	3	RXN-13123	3.52168	3	RXN-15742	3.72392	NIL	RXN-11187	3.8013	2	PANTEPADENYLYLTRAN-RXN	3.80964	2	2.5.1.67-RXN	3.85803	2	PRPPAMIDOTRANS-RXN_r	3.99874	2	3.4.17.14-RXN	3.77182	3	RXN-14267	3.45497	3	RXN-14835_f	4.47704	2	RXN-10700	3.98438	2	RXN-12686
	RXN-7591	3.48957	NIL	RXN-7591	3.48957	NIL	RXN-16443	5.49229	NIL	RXN-14715	5.0898	NIL	RXN-16438_r	4.8558	NIL	METHENYLTHFCYCLOHYDRO-RXN_r	3.43688	3	RXN-12536	3.52391	NIL	RXN-13648	3.7243	2	RXN-20419	3.8085	NIL	PRUNASIN-BETA-GLUCOSIDASE-RXN	3.81365	3	SEDOBISALDOL-RXN_f	3.86486	4	RXN-18305	4.00441	2	RXN-13970	3.77305	2	GLUTAMATE-FORMIMINOTRANSFERASE-RXN	3.45513	2	RXN-14835_r	4.47704	2	RXN-17035	3.99033	NIL	RXN-6261
	TAUROPINE-DEHYDROGENASE-RXN	3.49097	1	TAUROPINE-DEHYDROGENASE-RXN	3.49097	1	DIMETHUROPORDEHYDROG-RXN	5.50793	1	ACYLGLYCERONE-PHOSPHATE-REDUCTASE-RXN	5.10182	1	RXN-16162	4.85873	NIL	N-SULFOGLUCOSAMINE-SULFOHYDROLASE-RXN	3.43885	3	RXN-20734	3.52446	3	PRTRANS-RXN_f	3.72889	2	RXN-17683	3.81153	NIL	ISONOCARDICIN-SYNTHASE-RXN	3.81512	2	SEDOBISALDOL-RXN_r	3.86486	4	RXN-4314	4.00854	NIL	RXN-11663	3.77465	2	RXN-7082	3.4602	3	RXN18C3-30	4.47749	NIL	MALTACETYLTRAN-RXN	3.99379	2	HEMN-RXN
	1.1.1.152-RXN_f	3.49875	1	1.1.1.152-RXN_f	3.49875	1	RXN-16455	5.508	NIL	RXN-12932	5.1053	NIL	RXN-16169_f	4.85873	NIL	RXN-2	3.4391	2	RXN-18751_f	3.53122	5	PRTRANS-RXN_r	3.72889	2	RXN-15912	3.81374	NIL	RXN-17844	3.81512	2	RXN-12675_f	3.86845	5	PRAISOM-RXN	4.01034	5	2.3.1.92-RXN	3.78125	2	RXN-19572	3.46808	3	ANTHRANILATE-N-BENZOYLTRANSFERASE-RXN	4.48996	2	RXN-15658_f	4.00842	2	RXN-8810
	1.1.1.152-RXN_r	3.49875	1	1.1.1.152-RXN_r	3.49875	1	RXN-17223	5.5087	NIL	RXN-3941	5.10656	NIL	RXN-16169_r	4.85873	NIL	RXN-13210	3.44232	NIL	RXN-18751_r	3.53122	5	RXN-15945	3.73335	2	RXN-21094	3.8182	NIL	RXN-21211	3.81748	NIL	RXN-12675_r	3.86845	5	RXN-17842	4.01507	NIL	RXN-15722_f	3.78444	NIL	RXN-6242	3.46996	1	RXN18C3-26	4.49094	NIL	RXN-15658_r	4.00842	2	RXN-19177
	RXN-7659	3.49903	NIL	RXN-7659	3.49903	NIL	RXN3O-127	5.51208	1	RXN-18345	5.13028	1	RXN-15407	4.86718	1	RXN-801	3.44491	4	RXN-9015	3.53155	1	RXN-9385	3.73656	NIL	RXN-19313	3.82139	3	RXN-18005	3.81922	NIL	RXN-13811	3.86925	3	RXN-15749	4.01596	NIL	RXN-15722_r	3.78444	NIL	RXN-13533	3.47203	NIL	RXN-12697	4.49617	NIL	RXN-7864_f	4.02448	2	RXN-21196
	RXN-14830	3.50378	1	RXN-14830	3.50378	1	RXN-16440	5.56508	NIL	RXN0-6677	5.13405	NIL	RXN-15046	4.87547	1	RXN-7984	3.44573	NIL	RXN-1401	3.53609	1	RXN-18149	3.73942	NIL	RXN-4313	3.8222	NIL	RXN-16567_f	3.81922	4	RXN-20244	3.87124	NIL	RXN-8344	4.01862	2	RXNMETA-12671	3.78652	3	RXN3O-203	3.47209	NIL	RXN-12695	4.49617	NIL	RXN-7864_r	4.02448	2	RXN-21207
	RXN-16440	3.52378	NIL	RXN-16440	3.52378	NIL	RXN-16436	5.57274	NIL	R267-RXN	5.13411	NIL	RXN-16478	4.87811	1	3.5.1.79-RXN	3.44698	3	RXN-11067	3.53666	1	RXN-14355	3.74476	NIL	RXN-17078	3.82238	NIL	RXN-16567_r	3.81922	4	RXN-16160	3.87644	NIL	RXN-18914	4.02264	4	RXN-9684	3.78724	4	RXN-11367	3.47396	2	RXN18C3-46	4.52002	NIL	GLYCINE-N-ACYLTRANSFERASE-RXN	4.05431	2	RXN-14407
	RXN-16436	3.52438	NIL	RXN-16436	3.52438	NIL	RXN-17421	5.57459	NIL	HADTHAUERA-RXN_f	5.15619	1	OCTADECANAL-DECARBONYLASE-RXN	4.88562	4	RXN-18576	3.44717	4	RXN1G-2	3.53895	3	RXN-14616	3.74729	3	RXN-12238	3.82238	2	RXN-19306	3.82517	2	RXN-11290	3.87651	3	RXN-9991	4.02324	2	RXN-18071	3.79037	NIL	RXN-15413	3.47441	NIL	RXN-16658	4.52501	NIL	RXN-17070	4.09683	NIL	RXN-15971
	RXN-10646	3.54913	NIL	RXN-10646	3.54913	NIL	RXN-16741	5.57581	NIL	HADTHAUERA-RXN_r	5.15619	1	KYNURENINE-3-MONOOXYGENASE-RXN	4.89581	1	RXN-15412	3.44782	NIL	RXN0-3921	3.53989	NIL	UDP-GALACTURONATE-DECARBOXYLASE-RXN_f	3.7478	4	RXN-10002	3.82238	2	RXN-19299	3.82627	2	RIBOPHOSPHAT-RXN	3.88097	3	RXN-5467	4.02653	2	RXN-11290	3.7967	3	RXN-4305	3.47699	2	RXN-16661	4.52672	NIL	RXN-8713	4.11753	2	RXN-12324_f
	RXN-15024	3.54975	NIL	RXN-15024	3.54975	NIL	RXN-14769	5.61973	NIL	RXN-18003	5.15769	NIL	RXN-19981	4.90217	1	RXN-11663	3.4484	2	RXN-20062	3.54386	3	UDP-GALACTURONATE-DECARBOXYLASE-RXN_r	3.7478	4	RXN-19792	3.82286	3	RXN-4305	3.8265	2	RXN-9048	3.88527	1	RXN-5466	4.02653	2	RXN-18307	3.80145	2	RXN-4161_f	3.47947	5	RXN-17845	4.53026	2	RXN-10701	4.13101	2	RXN-12324_r
	RXN-11407	3.55045	1	RXN-11407	3.55045	1	RXN-20434	5.62631	1	OROTATE-REDUCTASE-NADH-RXN	5.16486	1	RXN-19982	4.90217	1	RXN-12963	3.44947	1	RXN-13067	3.54398	1	UDP-GLUCURONATE-DECARBOXYLASE-RXN	3.7478	4	RXN-12675_f	3.8246	5	RXN-17053	3.82796	NIL	RXN-12039	3.88885	NIL	RXN-12265	4.03126	3	RXN-15494	3.80272	NIL	RXN-4161_r	3.47947	5	RXN18C3-31	4.54319	NIL	2.3.1.67-RXN	4.15559	2	FTRMBARK-RXN_f
	URONATE-DEHYDROGENASE-RXN	3.55045	1	URONATE-DEHYDROGENASE-RXN	3.55045	1	RXN-16439	5.62952	NIL	R218-RXN	5.17269	NIL	RXN-11506	4.90395	NIL	RXN-8835	3.45042	5	R581-RXN	3.54445	4	R342-RXN	3.74863	6	RXN-12675_r	3.8246	5	RXN-15682	3.82884	3	RXN-18563	3.89302	4	GALACTOSIDE-3-FUCOSYLTRANSFERASE-RXN	4.04073	2	RXN-14689	3.80593	1	RXN-13751	3.48513	1	RXN-10996	4.54339	NIL	RXN-9192	4.17132	2	FTRMBARK-RXN_r
	RXN-16740	3.55071	NIL	RXN-16740	3.55071	NIL	RXN-16164	5.63822	NIL	1.5.1.32-RXN	5.17279	1	RXN-19796	4.911	NIL	RXN-17741	3.45083	3	RXN-8746	3.545	3	RXN-18058	3.75052	NIL	H2PTEROATESYNTH-RXN	3.82514	2	SEDOBISALDOL-RXN_f	3.8299	4	RXN-9051	3.89346	1	RXN-19315	4.04762	3	RXN-19166	3.80812	2	RXN-12660	3.48613	NIL	RXN-11	4.54517	2	AGMATINE-N4-COUMAROYLTRANSFERASE-RXN	4.18346	2	ECDYSONE-OXIDASE-RXN
	RXN66-314	3.55813	1	RXN66-314	3.55813	1	RXN-14855	5.64379	1	RXN-19871	5.17903	NIL	RXN-16566	4.91265	NIL	RXN-16303	3.45342	3	RXN1F-151	3.54647	5	RXN-19336	3.75795	NIL	RXN-9310	3.82525	4	SEDOBISALDOL-RXN_r	3.8299	4	3.4.17.13-RXN	3.8952	3	RXN-8793	4.05341	4	RXN-17532	3.81256	NIL	3.1.3.74-RXN	3.48661	3	RXN18C3-38	4.54787	NIL	2.3.1.45-RXN_f	4.18545	2	RXN-12704
	RXN-11939	3.55813	1	RXN-11939	3.55813	1	RXN-16442	5.65325	NIL	RXN-16215	5.1811	NIL	RXN-12930	4.91265	NIL	PRUNASIN-BETA-GLUCOSIDASE-RXN	3.45434	3	RXN-17583	3.54654	4	RXN-19335	3.7629	2	RXN-4303	3.82568	2	RXN-9488	3.8331	3	RXN-13185	3.90326	1	RXN-19314	4.05648	3	ACYLCARNITINE-HYDROLASE-RXN	3.81753	3	RXN-12662	3.4881	NIL	RXN18C3-34	4.54887	NIL	2.3.1.45-RXN_r	4.18545	2	3.6.1.41-RXN
	1.1.1.270-RXN	3.55813	1	1.1.1.270-RXN	3.55813	1	RXN-15615_f	5.68706	1	RXN-20144	5.18419	NIL	RXN-12921	4.91265	NIL	3.5.1.80-RXN	3.45623	3	4-CHLOROBENZOATE-DEHALOGENASE-RXN	3.55266	3	RXN-21171	3.76382	NIL	RXN-17139	3.8271	1	RXN-20419	3.84617	NIL	RXN-16086	3.90565	NIL	RXN-15605_f	4.05708	2	RXN-19333	3.81762	NIL	RXN-14430	3.48823	1	RXN18C3-49	4.58592	NIL	RXN1-42	4.20878	NIL	RXN-19281
	RXN-13686	3.55813	1	RXN-13686	3.55813	1	RXN-15615_r	5.68706	1	RXN-7835	5.18497	NIL	RXN-12929	4.91265	NIL	NAG6PDEACET-RXN	3.45623	3	RXN-10913	3.55745	1	RXN-16938	3.76453	3	RXN-4305	3.82812	2	RXN-11663	3.84931	2	URA-PHOSPH-RXN_f	3.90692	2	RXN-15605_r	4.05708	2	RXN-15603	3.82364	NIL	RXNQT-4344	3.48912	NIL	RXN-20387	4.61292	2	RXN-20226	4.20878	2	RXN-19273
	RXN66-24	3.55813	1	RXN66-24	3.55813	1	1.5.1.8-RXN	5.68755	1	RXN-9159	5.19367	1	RXN-8794	4.92067	NIL	RXN-8612	3.45677	1	RXN-17582	3.55978	4	RXN-18017	3.76476	2	KDO-8PSYNTH-RXN	3.83248	2	S-ADENOSYLHOMOCYSTEINE-DEAMINASE-RXN	3.85039	3	URA-PHOSPH-RXN_r	3.90692	2	RXN-9992	4.07286	3	3.4.17.11-RXN	3.82545	3	RXN-20557	3.4927	3	RXN-7792	4.61292	2	RXN-11796	4.20878	NIL	RXN0-5507
	1.1.1.278-RXN_f	3.55813	1	1.1.1.278-RXN_f	3.55813	1	RXN-18200_f	5.69428	NIL	RXN-9158	5.19367	1	1.5.1.19-RXN	4.92316	1	RXN18C3-61	3.45868	3	L-PIPECOLATE-OXIDASE-RXN	3.563	1	RXN-18273	3.771	NIL	HISTCYCLOHYD-RXN	3.83456	3	RXN-20544	3.85147	3	RXN-13166	3.90847	NIL	CPM-KDOSYNTH-RXN	4.07381	2	UDPMANACATRANS-RXN	3.82584	2	RXN-20731	3.49472	3	RXN-20372	4.61292	2	3.1.2.18-RXN	4.21487	3	RXNARA-8002
	1.1.1.278-RXN_r	3.55813	1	1.1.1.278-RXN_r	3.55813	1	RXN-18200_r	5.69428	NIL	RXN-5482	5.21877	NIL	RXN-9490	4.9413	1	RXN-10843	3.45972	1	BETA-ALANYL-COA-AMMONIA-LYASE-RXN_f	3.5642	4	RXN-18044	3.77281	NIL	RXN-21171	3.83618	NIL	CPM-KDOSYNTH-RXN	3.85207	2	RXN-21215	3.913	NIL	TRE6PHYDRO-RXN	4.07685	3	RXN-16251	3.82891	NIL	GLYOXI-RXN_f	3.49477	4	RXN18C3-42	4.61432	NIL	RXN-14255	4.21487	NIL	RXN-15680
	RXN66-19	3.55813	1	RXN66-19	3.55813	1	RXN-16930	5.69445	NIL	RXN-19861	5.22757	NIL	1.3.1.54-RXN_f	4.94229	1	RXN-12213	3.46156	NIL	BETA-ALANYL-COA-AMMONIA-LYASE-RXN_r	3.5642	4	RXN-15682	3.7747	3	RXN-11663	3.8375	2	RXN-21213	3.85922	NIL	RXN-11461	3.91434	4	RXN-14633	4.08216	3	RXN-15089	3.8292	3	GLYOXI-RXN_r	3.49477	4	RXN-9931	4.6172	2	ACYL-COA-HYDROLASE-RXN	4.21487	3	RXN-4313
	RXN66-319	3.55813	1	RXN66-319	3.55813	1	RXN-11720	5.74525	NIL	RXN-9484	5.2288	1	1.3.1.54-RXN_r	4.94229	1	RXN-15801	3.46231	1	RXN-18932_f	3.57165	1	RXN-20983	3.78328	NIL	RXN-9992	3.83866	3	RXN-14407	3.86052	1	RXN-19798	3.91955	NIL	RXN0-6254	4.08571	2	RXN-16276_f	3.83151	2	CONIFERIN-BETA-GLUCOSIDASE-RXN	3.49708	3	RXN-20405	4.61762	2	3.1.2.19-RXN	4.21487	3	PANTEPADENYLYLTRAN-RXN
	RXN-20442	3.55813	1	RXN-20442	3.55813	1	1.1.1.152-RXN_f	5.757	1	RXN-9483	5.2288	1	N-ACETYLGLUTPREDUCT-RXN_f	4.94513	1	RXN-9231	3.46265	4	RXN-18932_r	3.57165	1	RXN-17837	3.78421	2	RXN-14704	3.84327	3	GALPMUT-RXN_f	3.86491	5	RXN-12913	3.92076	NIL	RXN-21192	4.08704	NIL	RXN-16276_r	3.83151	2	RXN-8763	3.49742	3	RXN-18369	4.62592	2	RXN-14251	4.21487	NIL	RXN-12366
	RXN-18107	3.56124	NIL	RXN-18107	3.56124	NIL	1.1.1.152-RXN_r	5.757	1	RXN-21377	5.23634	NIL	N-ACETYLGLUTPREDUCT-RXN_r	4.94513	1	RXN-14863	3.46295	3	3.8.1.8-RXN	3.57197	3	RXN-12055	3.78534	NIL	RXN-5841	3.84601	3	GALPMUT-RXN_r	3.86491	5	RXN-19707	3.92485	3	UDP-GALACTURONATE-DECARBOXYLASE-RXN_f	4.09377	4	RXN-16600	3.83313	NIL	RXN-16867	3.49838	NIL	RXN0-7104	4.66042	NIL	RXN-20355	4.21487	NIL	4.2.3.12-RXN
	RXN-14246_f	3.56365	NIL	RXN-14246_f	3.56365	NIL	RXN-14016	5.78272	NIL	RXN-15024	5.24123	NIL	RXN-21292	4.94943	1	TROPINESTERASE-RXN	3.46359	3	GUANIDINOBUTYRASE-RXN	3.572	3	RXN-20785	3.78844	2	RXN-17435	3.84822	4	RXN-9988	3.87216	2	RXN-11664	3.92573	3	UDP-GALACTURONATE-DECARBOXYLASE-RXN_r	4.09377	4	RXN-15289	3.83386	3	RXN-17099	3.49873	3	GLUTAMINE-N-PHENYLACETYLTRANSFERASE-RXN	4.67273	2	RXN-14274	4.25627	2	RXN-15618
	RXN-14246_r	3.56365	NIL	RXN-14246_r	3.56365	NIL	RXN-16495	5.81077	NIL	RXN-14829	5.24324	1	1.1.1.52-RXN_f	4.95014	1	3.7.1.8-RXN	3.46384	3	RXN-17615	3.57817	NIL	RXN-17442	3.78888	NIL	RXN-15742	3.85117	NIL	RXN-11192	3.87861	3	RXN-19322	3.9269	3	UDP-GLUCURONATE-DECARBOXYLASE-RXN	4.09377	4	UDP-NACMURALA-GLU-LIG-RXN	3.83457	6	RXN-15805	3.49956	4	RXN0-7046	4.68945	NIL	RXN-21156	4.28095	NIL	RXN-9301
	1.14.13.101-RXN	3.56536	1	1.14.13.101-RXN	3.56536	1	RXN-9492	5.82853	NIL	RXN-17397_f	5.25756	1	1.1.1.52-RXN_r	4.95014	1	RXN-19271	3.46516	NIL	RXN-13946	3.57889	4	RXN-14361	3.78942	2	RXN-10053	3.8561	2	RXN-19875	3.88297	NIL	UDPACYLGLCNACDEACETYL-RXN	3.92717	3	RXN-15730	4.09572	4	RXN-11259	3.83728	NIL	RXN-9401	3.50008	NIL	5-AMINOLEVULINIC-ACID-SYNTHASE-RXN	4.69625	2	RXN-2601	4.29658	2	RXN-13392
	RXN-9819	3.56652	NIL	RXN-9819	3.56652	NIL	RXN-16589	5.82884	NIL	RXN-17397_r	5.25756	1	1.1.1.266-RXN	4.95998	1	R103-RXN	3.46603	4	RXN-14695	3.58149	1	RXN-11805	3.79089	NIL	RXN-17832	3.85614	3	R342-RXN	3.8861	6	RXN-19310	3.92827	3	RXN-18235	4.09928	2	RXN-19230	3.83992	4	RXN-9400	3.50008	NIL	RXN-18368	4.70033	2	RXN-16493	4.29704	NIL	RXN-19504
	RXN-16443	3.57211	NIL	RXN-16443	3.57211	NIL	RXN-14017	5.83704	NIL	RXN-19803	5.28967	1	DTDPDEHYRHAMREDUCT-RXN_f	4.95998	1	RXN-19255	3.46649	NIL	RXN-18228	3.5816	NIL	3.2.1.156-RXN	3.79949	3	RXN-14856	3.85707	NIL	RXN0-5227	3.88819	3	URPHOS-RXN_f	3.92856	2	RXN-19253_f	4.10002	3	RXN-19229	3.8408	2	RXN-9947	3.50008	NIL	CARNITINE-O-OCTANOYLTRANSFERASE-RXN	4.70473	2	2.3.1.133-RXN	4.31652	2	RXN-19798
	RXN-18104	3.57825	NIL	RXN-18104	3.57825	NIL	RXN-13433_f	5.83762	1	CHOLESTENONE-5-BETA-REDUCTASE-RXN_f	5.29017	1	DTDPDEHYRHAMREDUCT-RXN_r	4.95998	1	RXN-19301	3.46972	2	RXN-16056	3.58194	NIL	RXN-19339	3.79977	2	RIBOPHOSPHAT-RXN	3.85825	3	RXN-8810	3.88845	2	URPHOS-RXN_r	3.92856	2	RXN-19253_r	4.10002	3	RXN66-495	3.84099	1	RXN-9404	3.50008	NIL	RXN-7561	4.72475	2	RXN-10825	4.32028	NIL	RXN-14420
	RXN18C3-22	3.5788	NIL	RXN18C3-22	3.5788	NIL	RXN-13433_r	5.83762	1	CHOLESTENONE-5-BETA-REDUCTASE-RXN_r	5.29017	1	RXN-15050	4.96064	NIL	RXN-12349	3.47261	1	RXN-12643	3.58282	NIL	RXN-17438	3.80262	NIL	RXN-14861	3.85894	NIL	RXN-17166	3.88908	NIL	RXN-14338	3.93143	2	RXN18C3-14	4.10731	3	RXN-14609	3.84335	NIL	RXN-21122	3.50081	NIL	RXN-10733	4.73543	NIL	RXN-21157	4.35682	NIL	RXN-17213
	RXN18C3-23	3.5788	NIL	RXN18C3-23	3.5788	NIL	RXN-16928	5.84126	NIL	RXN-16566	5.30329	NIL	RXN-16034	4.97202	1	RXN-7567	3.47306	4	3.1.1.82-RXN	3.58298	3	1.8.1.15-RXN	3.80896	1	RXN-7984	3.86333	NIL	RXN-21110	3.89187	NIL	RXN-17139	3.93177	1	RXN0-5208	4.11814	NIL	RXN-13439	3.8446	6	RXN-7811	3.50127	2	ARGININE-N-SUCCINYLTRANSFERASE-RXN	4.73577	2	RXN-2621	4.38138	NIL	RXN-16276_f
	RXN-9245	3.58098	1	RXN-9245	3.58098	1	RXN-5282	5.84327	NIL	RXN-12930	5.30329	NIL	RXN-7678	4.98191	1	RXN-19600	3.47826	2	PYRNUTRANSHYDROGEN-RXN_f	3.5874	1	RXN-19357	3.8136	NIL	RXN-16588	3.86406	NIL	RXN-15790	3.89472	NIL	RXN-15332	3.93233	NIL	FADSYN-RXN_f	4.11987	2	RXN-8677	3.85384	NIL	LUMAZINESYN-RXN	3.50304	2	SUCCINYL-COA-HYDROLASE-RXN	4.73786	3	RXN-2622_f	4.39339	NIL	RXN-16276_r
	1.5.1.34-RXN	3.58504	1	1.5.1.34-RXN	3.58504	1	RXN-13660	5.85018	NIL	RXN-12921	5.30329	NIL	RXN-2883_f	4.99487	NIL	RXN-17605_f	3.47913	5	PYRNUTRANSHYDROGEN-RXN_r	3.5874	1	RXN-11112	3.8149	3	RXN-16649	3.8722	3	RXN-14063	3.90119	2	RXN-20419	3.93272	NIL	FADSYN-RXN_r	4.11987	2	RXN-15332	3.85397	NIL	RXN-10930	3.50681	NIL	RXN18C3-113_f	4.74571	NIL	RXN-2622_r	4.39339	NIL	RXN-623
	KYNURENINE-3-MONOOXYGENASE-RXN	3.59478	1	KYNURENINE-3-MONOOXYGENASE-RXN	3.59478	1	FCLREDUCT-RXN	5.85115	NIL	RXN-12929	5.30329	NIL	RXN-2883_r	4.99487	NIL	RXN-17605_r	3.47913	5	RXN-21122	3.5908	NIL	RXN-18377	3.81515	4	RXN-14703	3.87524	3	RXN-4313	3.9017	NIL	RXN-14837	3.93353	2	STREPTOMYCIN-3-ADENYLYLTRANSFERASE-RXN	4.1221	2	RXN-12330	3.85574	5	RXN-14179	3.50731	3	RXN18C3-113_r	4.74571	NIL	RXN-8859	4.39388	NIL	RXN-14398
	RXN-9578	3.59537	NIL	RXN-9578	3.59537	NIL	1.1.1.271-RXN	5.85115	1	RXN-14792	5.31539	NIL	RXN-15543	5.01375	1	RXN-8502	3.47953	NIL	RXN-7974	3.59735	1	RXN-14562	3.82121	2	STERYL-SULFATASE-RXN	3.88224	3	RXN-10034	3.90276	3	OLIGOGALACTURONIDE-LYASE-RXN	3.93385	4	RXN-15912	4.12248	NIL	RXN0-5359	3.86572	2	RXN-14046	3.50759	3	RXN-14937	4.75671	3	RXN-7633	4.3978	2	RXN-13403
	RXN-13069	3.59862	1	RXN-13069	3.59862	1	RXN-7660	5.8588	NIL	RXN-9245	5.32761	1	RXN66-343	5.01694	1	RXN-16526	3.48004	NIL	PREPHENATE-TRANSAMINE-RXN_f	3.59761	2	RXN0-3521	3.8219	2	RXN0-5214	3.88439	NIL	5.4.1.2-RXN_f	3.90373	5	RXN-15912	3.9355	NIL	RXN-15328	4.12324	NIL	RXN3O-504	3.86589	NIL	RXN-13171	3.50822	3	RXN-10725	4.75732	NIL	RXN-8857	4.42013	NIL	RXN-18343
	RXN-9487	3.60409	NIL	RXN-9487	3.60409	NIL	RXN-19329	5.86451	1	RXN-21340	5.32853	1	RXNQT-4337	5.03801	1	RXN66-351_f	3.48063	5	PREPHENATE-TRANSAMINE-RXN_r	3.59761	2	RXN-14430	3.82252	1	RXN-20582	3.88741	1	5.4.1.2-RXN_r	3.90373	5	RXN-8770	3.9355	3	RXN-16748	4.12581	2	RXN-12153	3.86691	NIL	RXN-14689	3.50908	1	RXN-14788	4.76133	2	RXN-21158	4.4205	NIL	IGPSYN-RXN
	1.1.1.252-RXN_f	3.6052	1	1.1.1.252-RXN_f	3.6052	1	DIHYDROFOLATEREDUCT-RXN	5.86451	1	RXN-19797	5.33657	NIL	RXN-16539	5.0458	NIL	RXN66-351_r	3.48063	5	UDPGLUCEPIM-RXN_f	3.59973	5	RXN-12153	3.82295	NIL	RXN-19504	3.88755	3	RXN-12039	3.90447	NIL	RXN0-7092	3.93592	NIL	RXN-13165	4.12734	1	RXN-19587	3.86927	3	RXN-7647	3.51005	5	RXN-14774	4.76133	2	RXN-8988	4.44353	6	RXN-13628
	1.1.1.252-RXN_r	3.6052	1	1.1.1.252-RXN_r	3.6052	1	RXN-20330	5.87297	NIL	1.1.1.266-RXN	5.33881	1	RXN-15514	5.04613	1	RXN-9051	3.48104	1	UDPGLUCEPIM-RXN_r	3.59973	5	RXN-14421	3.82342	2	RXN-14338	3.88878	2	RXN-10620	3.90599	1	1TRANSKETO-RXN_f	3.93781	2	RXN-13729	4.12911	4	TRANS-HEXAPRENYLTRANSTRANSFERASE-RXN	3.87094	2	RXN-17139	3.51093	1	RXN-10735	4.76163	NIL	RXN-9244	4.44545	2	RXN-15413
	RXN-15026	3.60834	NIL	RXN-15026	3.60834	NIL	RXN-5961	5.88508	NIL	DTDPDEHYRHAMREDUCT-RXN_f	5.33881	1	RXN-15367	5.06426	1	RXN-3625	3.48458	NIL	5.1.1.17-RXN_f	3.59973	5	GALACTOSIDE-3-FUCOSYLTRANSFERASE-RXN	3.82405	2	RXN-20557	3.89132	3	RXN-19360	3.90787	2	1TRANSKETO-RXN_r	3.93781	2	RXN-17837	4.12967	2	ATPPHOSPHORIBOSYLTRANS-RXN_f	3.87213	2	RXN1ZN3-9	3.51237	NIL	RXN-14793	4.76558	2	GLUCOSAMINEPNACETYLTRANS-RXN	4.45116	2	RXN-15264
	1.2.1.66-RXN	3.61131	1	1.2.1.66-RXN	3.61131	1	RXN-14668	5.88668	NIL	DTDPDEHYRHAMREDUCT-RXN_r	5.33881	1	RXN-15357_f	5.08356	NIL	RXN-18493	3.48466	3	5.1.1.17-RXN_r	3.59973	5	RXN-17532	3.82461	NIL	RXN-14407	3.89133	1	H2PTEROATESYNTH-RXN	3.91476	2	RXN-18105	3.9405	NIL	RXN-8342	4.13121	2	ATPPHOSPHORIBOSYLTRANS-RXN_r	3.87213	2	RXN-14823	3.51338	1	TETHYDPICSUCC-RXN	4.76785	2	RXN-8715	4.45576	2	NAD+-ADP-RIBOSYLTRANSFERASE-RXN_f
	1.14.12.4-RXN	3.61346	1	1.14.12.4-RXN	3.61346	1	FLAVONADPREDUCT-RXN_f	5.92812	1	RXN-14802	5.34186	NIL	RXN-15357_r	5.08356	NIL	RXN-18073	3.48529	NIL	3.4.24.75-RXN	3.59973	3	RXN-15749	3.82509	NIL	RXN-13185	3.89185	1	RXN-15332	3.92135	NIL	RXN-19326	3.94129	3	RXN-8284	4.13122	NIL	RXN-9222	3.8733	2	RXN-19301	3.51695	2	RXN-15950	4.77038	NIL	RXN-2202	4.47806	2	NAD+-ADP-RIBOSYLTRANSFERASE-RXN_r
	RXN-11970_f	3.61426	1	RXN-11970_f	3.61426	1	FLAVONADPREDUCT-RXN_r	5.92812	1	RXN-12750	5.34404	1	RXN-12747_f	5.09213	1	RXN-19875	3.48654	NIL	RXN-9141	3.59973	5	RXN-14863	3.82545	3	RXN-20244	3.89249	NIL	RXN-19798	3.92241	NIL	RXN-12153	3.94548	NIL	RXN-8770	4.13301	3	RXN-9800	3.87368	2	RXN-18442	3.51841	2	RXN-10086	4.77114	2	TYRAMINE-N-FERULOYLTRANSFERASE-RXN_f	4.50454	2	UDP-NACMURALA-GLU-LIG-RXN
	RXN-11970_r	3.61426	1	RXN-11970_r	3.61426	1	RXN-12444	5.92812	1	1.5.1.27-RXN_f	5.35939	1	RXN-12747_r	5.09213	1	TYROSINE-23-AMINOMUTASE-RXN_f	3.48678	5	RXN-9797_f	3.59973	5	RXNQT-4161	3.82602	NIL	URIDINE-NUCLEOSIDASE-RXN	3.89331	3	CEPHALOSPORIN-C-DEACETYLASE-RXN	3.92419	3	RXN-10970	3.94707	3	RXN-9989	4.13659	3	2.4.1.142-RXN	3.88335	2	RXN-2223	3.52024	NIL	RXN-11007	4.7765	NIL	TYRAMINE-N-FERULOYLTRANSFERASE-RXN_r	4.50454	2	RXN-17238
	RXN-19408	3.62017	NIL	RXN-19408	3.62017	NIL	RXN-20331	5.92912	NIL	1.5.1.27-RXN_r	5.35939	1	RXN-20920	5.09281	NIL	TYROSINE-23-AMINOMUTASE-RXN_r	3.48678	5	RXN-9797_r	3.59973	5	3.4.17.13-RXN	3.82928	3	RXN-7985	3.89591	NIL	RXN-10966	3.92449	3	RXN-19320	3.94832	3	RXN-18005	4.13702	NIL	RXN-19167	3.88346	2	RXN-12775_f	3.52091	4	RXN-20356	4.77917	2	RXN-13612	4.51611	4	RXN-15945
	RXN-5961	3.62103	NIL	RXN-5961	3.62103	NIL	RXN-18814	5.94329	1	1.1.1.51-RXN	5.36092	1	RETINOL-DEHYDROGENASE-RXN_f	5.1149	1	RXN-19838	3.48681	4	3.1.4.43-RXN	3.59973	3	RXN-13203	3.82959	2	RXN-14227	3.89722	3	RXN-13532	3.92494	NIL	RXN-19323	3.95199	3	RXN-16567_f	4.13702	4	1.8.5.1-RXN	3.88412	1	RXN-12775_r	3.52091	4	RXN-20352	4.77917	2	RXN0-5390	4.53211	NIL	RXN-14688
	RXN-15015	3.62919	NIL	RXN-15015	3.62919	NIL	RXN-11998	5.95319	1	RXN-12673	5.37317	1	RETINOL-DEHYDROGENASE-RXN_r	5.1149	1	RXN-19841	3.48681	NIL	RXN-14178_f	3.59973	5	RXN-18226	3.83371	3	RXN-11461	3.8987	4	RXN-13212_f	3.92619	NIL	RXN-13204	3.9521	3	RXN-16567_r	4.13702	4	RXN-14421	3.88662	2	RXN-15419_f	3.5212	2	RXN-20224	4.79211	2	RXN-12751	4.53653	2	2.4.1.53-RXN
	RXN-11506	3.63376	NIL	RXN-11506	3.63376	NIL	RXN-16262	5.95935	1	RXN-16216	5.37368	NIL	RXN-12562	5.1149	NIL	HISTIDPHOS-RXN	3.49218	3	RXN-14178_r	3.59973	5	RXN-8883	3.83744	NIL	RXN-17061	3.90778	NIL	RXN-13212_r	3.92619	NIL	RXN-13938_f	3.95394	NIL	RXN-19301	4.13744	2	RXN-9847	3.89184	4	RXN-15419_r	3.5212	2	RXN18C3-39	4.79709	NIL	RXN18C3-27	4.54076	NIL	RXN-15617_f
	RXN0-7021	3.6429	NIL	RXN0-7021	3.6429	NIL	RXN-9578	5.97118	NIL	RXN-21346_f	5.37488	1	RXN-12577	5.1149	NIL	RXN-17693	3.49686	1	RXN-20681_f	3.59973	NIL	2.3.1.72-RXN	3.8377	2	RXN-19253_f	3.91008	3	STERYL-SULFATASE-RXN	3.92753	3	RXN-13938_r	3.95394	NIL	RXN-10620	4.14201	1	RXN-14688	3.89767	1	SUCCINYLDIAMINOPIMTRANS-RXN	3.52212	2	RXN-10821	4.8141	2	RXN-18371_f	4.5409	2	RXN-15617_r
	RXN-18200_f	3.65445	NIL	RXN-18200_f	3.65445	NIL	RXN-16162	5.98062	NIL	RXN-21346_r	5.37488	1	RXN-9489	5.11956	1	RXN-19755	3.50049	NIL	RXN-20681_r	3.59973	NIL	ISONOCARDICIN-SYNTHASE-RXN	3.83787	2	RXN-19253_r	3.91008	3	RXN-10930	3.92872	NIL	AICARSYN-RXN_f	3.9555	4	RXN0-5123	4.14453	NIL	RXN-8344	3.89915	2	RXN-12610	3.5224	2	HOMSUCTRAN-RXN	4.84433	2	RXN-18371_r	4.5409	2	RXN-21033
	RXN-18200_r	3.65445	NIL	RXN-18200_r	3.65445	NIL	RXN-16169_f	5.98062	NIL	TRANSENOYLCOARED-RXN	5.37726	1	RXN-8683	5.12581	1	3.5.3.22-RXN	3.50133	3	HYDROXYHEPTA-DIENEDIOATE-HYDROXY-RXN	3.59973	4	RXN-17844	3.83787	2	RXN-14429	3.91258	3	ATP-ADENYLYLTRANSFERASE-RXN_f	3.93226	2	AICARSYN-RXN_r	3.9555	4	RXN-19322	4.14597	3	RXN-19504	3.89953	3	3.5.1.92-RXN	3.52503	3	RXN-13247	4.84798	NIL	RXN-12161	4.56007	NIL	RXN-21192
	GEISSOSCHIZINE-DEHYDROGENASE-RXN	3.65689	1	GEISSOSCHIZINE-DEHYDROGENASE-RXN	3.65689	1	RXN-16169_r	5.98062	NIL	RXN-11726	5.37726	1	RXN-8678	5.12581	1	RXN-18225	3.50138	NIL	DTDPDEHYDRHAMEPIM-RXN	3.59973	5	RXN-13176	3.83917	2	RXN-19798	3.9149	NIL	ATP-ADENYLYLTRANSFERASE-RXN_r	3.93226	2	RXN0-5409	3.95747	NIL	RXN-18378	4.14739	4	RXN-11435	3.90019	3	2.5.1.69-RXN	3.52851	2	RXN-11668	4.84798	NIL	RXN-10749	4.56606	2	RXN-13630
	RXN0-7101_f	3.66192	NIL	RXN0-7101_f	3.66192	NIL	FMNREDUCT-RXN	5.98498	1	RXN66-482	5.37726	1	RXN-14818	5.13385	1	RXN-7656	3.50141	NIL	THROMBOXANE-A-SYNTHASE-RXN	3.59973	5	RXN-13315	3.83956	NIL	RXN-12913	3.91768	NIL	RXN-21094	3.93261	NIL	RXN-19319	3.95816	3	RXN-12230	4.14847	2	RXN-13791	3.90101	NIL	RXN-668	3.52915	NIL	HYDROXYMETHYLGLUTARYL-COA-HYDROLASE-RXN	4.85238	3	RXN-13728_f	4.56962	2	1.5.4.1-RXN
	RXN0-7101_r	3.66192	NIL	RXN0-7101_r	3.66192	NIL	DIENOYLCOAREDUCT-RXN	5.98649	1	RXN-7711	5.37726	1	RXN-12689	5.15364	1	RXN-18481	3.50153	3	RXN-14816_f	3.59973	NIL	BTUR2-RXN	3.8411	2	P-PANTOCYSDECARB-RXN	3.91878	4	RXN-19707	3.94099	3	RXN-19324	3.95822	3	3.6.1.41-RXN	4.14858	3	RXN-19047	3.90112	NIL	RXN-14822	3.52955	1	RXN18C3-35	4.86944	NIL	RXN-13728_r	4.56962	2	RXN-14991
	RXN-16437	3.66214	NIL	RXN-16437	3.66214	NIL	RXN-9510	6.01418	1	RXN-14773	5.37755	NIL	RXN-13945	5.16551	NIL	RXN-17045	3.50239	NIL	RXN-14816_r	3.59973	NIL	RXN1F-475	3.84343	NIL	RXNQT-4344	3.92012	NIL	RXN-14633	3.94193	3	RXN0-5216	3.96094	NIL	RXN-13166	4.15637	NIL	RXN-15013_f	3.90234	NIL	RXN-14820	3.52955	1	RXN-13441	4.8863	2	2.3.1.99-RXN_f	4.57684	2	RXN0-5225
	INDOLELACTATE-DEHYDROGENASE-RXN	3.66528	1	INDOLELACTATE-DEHYDROGENASE-RXN	3.66528	1	GDP-MANNOSE-6-DEHYDROGENASE-RXN	6.03459	1	RXN-14787	5.37755	NIL	RXN-20995	5.16632	1	RXN-21021	3.50626	NIL	PROSTAGLANDIN-D-SYNTHASE-RXN	3.59973	5	RXN-14270	3.84381	2	AICARSYN-RXN_f	3.9216	4	R345-RXN	3.94347	6	RXN-17166	3.96175	NIL	RXN-9485	4.15752	4	RXN-15013_r	3.90234	NIL	RXN-15649	3.53003	4	RXN-13322	4.88695	2	2.3.1.99-RXN_r	4.57684	2	ATPPHOSPHORIBOSYLTRANS-RXN_f
	RXN-10133	3.66875	NIL	RXN-10133	3.66875	NIL	RXN-9487	6.04115	NIL	RXN-15026	5.38173	NIL	BILIVERDIN-REDUCTASE-RXN	5.17079	1	RXN-15930	3.50649	NIL	RXN-14761	3.59973	5	2.4.1.53-RXN	3.84479	2	AICARSYN-RXN_r	3.9216	4	5.1.3.23-RXN	3.94421	5	RXN-8344	3.96249	2	RXN-20244	4.15802	NIL	RXN-14640	3.90316	3	RXN-12237_f	3.53104	4	RXN-17062	4.88846	NIL	RXN18C3-32	4.57888	NIL	ATPPHOSPHORIBOSYLTRANS-RXN_r
	RXN-14855	3.6701	1	RXN-14855	3.6701	1	RXN-19984	6.06628	NIL	RXN-19993	5.38319	NIL	RXN-17004	5.17087	NIL	RXN-9494	3.50756	4	RXN-18190_f	3.59973	NIL	RXN-16259	3.8471	NIL	RIBOSYLHOMOCYSTEINASE-RXN	3.92423	4	RXN-17406	3.94454	2	RXN-18180	3.96374	NIL	RXN-19320	4.15866	3	FADSYN-RXN_f	3.90428	2	RXN-12237_r	3.53104	4	RXN-12699	4.90713	NIL	GLUTARATE--COA-LIGASE-RXN	4.58657	6	RXN-19581
	RXN-16653	3.67653	1	RXN-16653	3.67653	1	RXN-12559	6.06704	1	RXN-17387	5.39341	1	RXN-16406	5.17612	NIL	RXN-17352	3.50774	1	RXN-18190_r	3.59973	NIL	RXN-15722_f	3.84778	NIL	RXN-17701	3.92434	3	RXN-10647	3.94493	NIL	RXN-18181	3.96374	NIL	RXN-19707	4.16003	3	FADSYN-RXN_r	3.90428	2	CYPRIDINA-LUCIFERIN-2-MONOOXYGENASE-RXN	3.53154	1	RXN-8927	4.92348	NIL	RXN-16473_f	4.58721	2	COENZYME-F420-HYDROGENASE-RXN
	NAPHTHALENE-12-DIOXYGENASE-RXN	3.67843	1	NAPHTHALENE-12-DIOXYGENASE-RXN	3.67843	1	AZOBENZENE-REDUCTASE-RXN	6.08121	1	RXN-16478	5.39388	1	RXN-8684	5.1803	1	GLUTAMATE-FORMIMINOTRANSFERASE-RXN	3.50927	2	RXN-9985	3.59973	3	RXN-15722_r	3.84778	NIL	TAGAALDOL-RXN	3.92812	4	RXN-12610	3.94866	2	RXN-14429	3.96398	3	S-ADENOSYLHOMOCYSTEINE-DEAMINASE-RXN	4.16274	3	RXN-13908	3.90725	4	JUVENILE-HORMONE-ESTERASE-RXN	3.5386	3	RXN18C3-48	4.92646	NIL	RXN-16473_r	4.58721	2	RXN-10904
	PHENYLALANINE-DEHYDROGENASE-RXN	3.6815	1	PHENYLALANINE-DEHYDROGENASE-RXN	3.6815	1	1.17.1.1-RXN	6.14844	1	RXN-9495	5.41055	NIL	RXN-8679	5.1803	1	RXN-17061	3.51101	NIL	5.1.99.4-RXN_f	3.59973	5	2.4.1.206-RXN	3.84958	2	F16ALDOLASE-RXN_f	3.92812	4	RXN-11290	3.94972	3	RXN-18481	3.96794	3	RXN-2222	4.16459	NIL	RXN-9003	3.90728	2	RXN-19282	3.53903	5	RXN-2006	4.92646	NIL	RXN-13430	4.60839	3	2.5.1.42-RXN
	RXN-12658	3.69342	1	RXN-12658	3.69342	1	RXN-15048	6.15446	1	RXN-15079	5.41305	NIL	RXN-7632	5.19638	1	RXN1F-147	3.5142	5	5.1.99.4-RXN_r	3.59973	5	RXN-18020	3.85196	2	F16ALDOLASE-RXN_r	3.92812	4	RXN-17388	3.95077	3	RXN-15790	3.97236	NIL	RXN-18254	4.16601	2	RXN-18271	3.90972	2	MHPCHYDROL-RXN	3.54505	3	RXN0-7103	4.93793	NIL	RXN-19880	4.60986	2	RXN-20556
	RXN-9885	3.6953	1	RXN-9885	3.6953	1	RXN-14532	6.15446	1	CHOLESTENONE-5-ALPHA-REDUCTASE-RXN	5.4131	1	RXN-16742	5.19873	NIL	RXN-17099	3.51897	3	GLUTRACE-RXN_f	3.59973	5	RXN-17166	3.85282	NIL	RXN0-7219	3.94338	NIL	CHOLOYLGLYCINE-HYDROLASE-RXN	3.95226	3	UDP-GALACTURONATE-DECARBOXYLASE-RXN_f	3.97813	4	RXN0-262	4.16672	2	RXN-18294	3.91642	2	RXN-13868	3.54611	1	RXN-18568	4.94665	2	2.3.1.157-RXN	4.60986	2	UROPORIIIMETHYLTRANSA-RXN
	RXN-13483	3.70081	NIL	RXN-13483	3.70081	NIL	RXN-14184_f	6.15446	1	TRANS-2-ENOYL-COA-REDUCTASE-NAD+-RXN	5.41409	1	RXN-11390	5.21371	1	RXN-7733	3.51973	1	GLUTRACE-RXN_r	3.59973	5	RXN-16250	3.85403	3	RXN0-5227	3.94417	3	RXN-17170	3.956	NIL	UDP-GALACTURONATE-DECARBOXYLASE-RXN_r	3.97813	4	RXN-12899	4.16707	3	3.4.24.32-RXN	3.91787	3	RXN0-7001	3.54663	3	PHOSPHATE-BUTYRYLTRANSFERASE-RXN_f	4.94925	2	PHENYLALANINE-N-ACETYLTRANSFERASE-RXN_f	4.64865	2	RXN-18759
	RXN-19984	3.70373	NIL	RXN-19984	3.70373	NIL	RXN-14184_r	6.15446	1	RXN-12558	5.41409	1	RXN-14859_f	5.21395	1	RXN-21248	3.51987	NIL	RXN-14459_f	3.59973	5	RXN-10673	3.85531	2	RXN-13811	3.94848	3	RXN-8798	3.95785	NIL	UDP-GLUCURONATE-DECARBOXYLASE-RXN	3.97813	4	RXN-19324	4.1681	3	RXN-1444	3.91886	3	R83-RXN	3.54763	3	PHOSPHATE-BUTYRYLTRANSFERASE-RXN_r	4.94925	2	PHENYLALANINE-N-ACETYLTRANSFERASE-RXN_r	4.64865	2	RXN-18020
	RXN-14824	3.70539	1	RXN-14824	3.70539	1	UDPMANNACADEHYDROG-RXN	6.15491	1	RXN-12939_f	5.41592	1	RXN-14859_r	5.21395	1	RXN-9485	3.52043	4	RXN-14459_r	3.59973	5	RXN-18235	3.85681	2	RXN-20581	3.94895	1	RXN-8222	3.96115	3	RXN-12583	3.98076	NIL	N-ACYLNEURAMINATE-9-PHOSPHATASE-RXN	4.16825	3	RXN-8454	3.9207	1	PRUNASIN-BETA-GLUCOSIDASE-RXN	3.548	3	RXN-19804	4.95208	2	CITRATE--COA-LIGASE-RXN	4.65678	6	RXN-20983
	RXN-13344	3.70586	1	RXN-13344	3.70586	1	1.1.1.136-RXN	6.15491	1	RXN-12939_r	5.41592	1	RXN-19816	5.22045	1	RXN-19298	3.52193	2	RXN-12065	3.59973	NIL	2.5.1.42-RXN	3.85738	2	RXN-14900	3.95088	3	RXN-16748	3.96164	2	P-PANTOCYSDECARB-RXN	3.98194	4	RXN-14609	4.16835	NIL	RXN-14980	3.92456	3	RXN-17737	3.54867	3	ACETOACETYL-COA-HYDROLASE-RXN	4.95351	3	RXN-8714	4.65716	2	RXN-13824
	RXNQT-4334	3.72128	1	RXNQT-4334	3.72128	1	RXN-13749	6.1574	1	RXN-9065	5.42704	NIL	RXNQT-4334	5.22085	1	RXN-7985	3.52197	NIL	RXN66-504	3.59973	1	RXN0-7343	3.85804	NIL	RXN-13695	3.9545	3	2.4.2.12-RXN	3.96756	2	RXN-7984	3.98294	NIL	RXN-19326	4.17205	3	UROGENIIISYN-RXN	3.92685	4	RXN-19568	3.55079	3	3-ETHYLMALATE-SYNTHASE-RXN	4.96817	2	GALACTOACETYLTRAN-RXN	4.66771	2	DAPASYN-RXN_f
	RXN-13342	3.72773	1	RXN-13342	3.72773	1	RXN-18107	6.16071	NIL	RXN-9490	5.44343	1	RXN-19983	5.22251	NIL	RXN-10892	3.52325	2	RXN-4286_f	3.59973	5	RXN-14285	3.86274	2	2.5.1.67-RXN	3.95509	2	RXN-17442	3.96815	NIL	RXN-19229	3.9835	2	RXN-19323	4.17699	3	RXN-18274	3.92866	2	RXN-14420	3.55425	2	RXN-16269	4.98024	1	RXN-19425_f	4.6714	2	DAPASYN-RXN_r
	RXN-16741	3.73196	NIL	RXN-16741	3.73196	NIL	RXN-8765	6.1608	1	TESTOSTERONE-17-BETA-DEHYDROGENASE-RXN	5.44846	1	RXN-9819	5.22998	NIL	RXN-1401	3.52516	1	RXN-4286_r	3.59973	5	RXN-7759	3.86359	2	RXN-12059	3.95921	3	RXN-19339	3.96953	2	RXN-8144	3.98599	4	RXN-15742	4.17896	NIL	RAUCAFFRICINE-BETA-GLUCOSIDASE-RXN	3.93429	3	RXN-18444	3.55513	2	RXN-10734	5.00072	NIL	RXN-19425_r	4.6714	2	RXN-18045
	RXN-9874	3.73222	NIL	RXN-9874	3.73222	NIL	RXN-12687	6.19423	1	RXN-18463	5.44971	NIL	RXN-11982	5.25021	NIL	RXN-19568	3.52679	3	RXN-18185	3.59973	NIL	RXN-14063	3.86737	2	S-ADENOSYLHOMOCYSTEINE-DEAMINASE-RXN	3.97029	3	RXN-15328	3.97073	NIL	RXN-9988	3.98718	2	RXN-18257	4.18026	2	COA-DISULFIDE-REDUCTASE-NADH-RXN_f	3.93543	1	RXN-18445	3.55513	2	RXN-17071	5.00347	NIL	RXN18C3-44	4.69085	NIL	RXN-16344
	RXN-9873	3.73293	NIL	RXN-9873	3.73293	NIL	RXN-14830	6.19985	1	RXN-17980	5.45033	1	RXN-13468	5.25163	1	RXN-8441	3.52692	3	MALEYLACETOACETATE-ISOMERASE-RXN	3.59973	5	RXN-4314	3.86813	NIL	RXN-13627	3.97101	NIL	RXN-14605	3.97089	3	ATPPHOSPHORIBOSYLTRANS-RXN_f	3.98849	2	RXN-16427	4.18322	2	COA-DISULFIDE-REDUCTASE-NADH-RXN_r	3.93543	1	RXN-17078	3.55918	NIL	2.3.1.166-RXN	5.00796	2	2.3.1.89-RXN	4.69159	2	RXN-8474
	RXN-14466	3.73515	NIL	RXN-14466	3.73515	NIL	RXN-19408	6.22196	NIL	CHLORDECONE-REDUCTASE-RXN_f	5.47111	1	1.1.1.64-RXN	5.25443	1	R122-RXN	3.52707	3	RXN-17843	3.59973	5	GALPMUT-RXN_f	3.869	5	RXN-12153	3.97359	NIL	RXN-19298	3.97308	2	ATPPHOSPHORIBOSYLTRANS-RXN_r	3.98849	2	RXN-19310	4.18337	3	4.2.1.107-RXN_f	3.9371	4	RXN-12238	3.55918	2	RXN-8809	5.05719	2	DIHYDLIPACETRANS-RXN	4.69774	2	RXN-6242
	RXN-9492	3.73901	NIL	RXN-9492	3.73901	NIL	RXN-14683	6.23136	NIL	CHLORDECONE-REDUCTASE-RXN_r	5.47111	1	RXN-15434	5.25811	1	RXN-11783	3.52954	1	3.1.1.76-RXN	3.59973	3	GALPMUT-RXN_r	3.869	5	RXN-18073	3.9738	NIL	RXN-19359	3.97731	2	PHOSACETYLGLUCOSAMINEMUT-RXN_f	3.98894	5	RXN-21196	4.18433	NIL	4.2.1.107-RXN_r	3.9371	4	RXN-10002	3.55918	2	RXN-15657_f	5.066	2	RXN-12954	4.69822	2	RXN-17129
	RXN-15253	3.74557	1	RXN-15253	3.74557	1	RXN-20132	6.23241	NIL	1.3.1.56-RXN	5.49586	1	RXN-8795	5.26223	NIL	RXN-17998	3.53237	NIL	RXN-12134	3.59973	3	UDPMANACATRANS-RXN	3.87512	2	RXN-13210	3.97627	NIL	RXN-21034	3.97805	NIL	PHOSACETYLGLUCOSAMINEMUT-RXN_r	3.98894	5	RXN-16649	4.18959	3	RXN-13323	3.93738	2	RXN-16480_f	3.56245	1	RXN-15657_r	5.066	2	RXN-16241	4.71956	NIL	GLYOHMETRANS-RXN_f
	RXN-15254	3.74557	1	RXN-15254	3.74557	1	RXN-12932	6.24868	NIL	1.1.1.149-RXN_f	5.50637	1	RXN-8796	5.27337	NIL	RXN-8829	3.53421	5	RXNQT-4164	3.59973	4	RXN0-963	3.88067	NIL	RXN-11664	3.97883	3	RXN-12611	3.97908	2	R342-RXN	3.99075	6	RXN-13075_f	4.19209	2	RXN-1082	3.9374	2	RXN-16480_r	3.56245	1	RXN-20228	5.07106	2	RXN-13094	4.72159	NIL	GLYOHMETRANS-RXN_r
	RXN-15255	3.74557	1	RXN-15255	3.74557	1	RXN-15818	6.26855	NIL	1.1.1.149-RXN_r	5.50637	1	1.1.1.248-RXN_f	5.27459	1	RXN-20557	3.53702	3	HYDROXY-MANDELATE-RACEMASE-RXN	3.59973	5	2.4.1.82-RXN	3.88186	2	RXN0-304	3.98962	NIL	RXN-13596_f	3.98135	2	RXN-15805	3.99131	4	RXN-13075_r	4.19209	2	ARACHIDONATE-12-LIPOXYGENASE-RXN	3.93963	1	3.7.1.8-RXN	3.56588	3	RXN-20220	5.07106	2	RXN-15074	4.75503	2	RXN66-495
	RXN-16495	3.7463	NIL	RXN-16495	3.7463	NIL	RXN-16133_f	6.28557	1	RXN-13385	5.51384	NIL	1.1.1.248-RXN_r	5.27459	1	RXN-15413	3.53702	NIL	MYO-INOSOSE-2-DEHYDRATASE-RXN	3.59973	4	RXN-17447	3.88263	NIL	THIAZOLSYN2-RXN	3.98984	2	RXN-13596_r	3.98135	2	RXN-17683	3.99324	NIL	ISONOCARDICIN-SYNTHASE-RXN	4.19381	2	RXN-12704	3.94235	NIL	RXN0-2381_f	3.56601	4	RXN-19396	5.07106	2	RXN-19257	4.76862	NIL	RXN-8454
	MYO-INOSITOL-2-DEHYDROGENASE-RXN_f	3.74969	1	MYO-INOSITOL-2-DEHYDROGENASE-RXN_f	3.74969	1	RXN-16133_r	6.28557	1	RXN-20994	5.52569	1	RXN-16579	5.28249	NIL	RXN-14430	3.53729	1	RXN-8269	3.59973	1	HEMEOSYN-RXN	3.88421	2	RXN-12039	3.99634	NIL	RXN-17061	3.98177	NIL	R345-RXN	3.99478	6	RXN-17844	4.19381	2	RXN-4222	3.94259	NIL	RXN0-2381_r	3.56601	4	RXN-15677	5.08484	2	2.3.1.130-RXN_f	4.79358	2	RXN-11435
	MYO-INOSITOL-2-DEHYDROGENASE-RXN_r	3.74969	1	MYO-INOSITOL-2-DEHYDROGENASE-RXN_r	3.74969	1	RXN-20676	6.28557	1	OCTADECANAL-DECARBONYLASE-RXN	5.55029	4	RXN-11472_f	5.29341	1	RXN-21094	3.53896	NIL	ALDOSE1EPIM-RXN_f	3.59973	5	RXN-9990	3.88668	2	RXN-18180	3.99846	NIL	RXN-17178	3.98223	NIL	RXN-17837	3.99507	2	RXN-19319	4.19436	3	RXN-14615	3.94588	NIL	RXN-14113	3.56683	3	THIOESTER-RXN	5.08828	3	2.3.1.130-RXN_r	4.79358	2	RXN-15682
	RXN-11390	3.75024	1	RXN-11390	3.75024	1	RXN-16136	6.28557	NIL	RXN-708	5.55779	NIL	RXN-11472_r	5.29341	1	RXN-11454	3.54212	1	ALDOSE1EPIM-RXN_r	3.59973	5	RXN-18307	3.887	2	RXN-18181	3.99846	NIL	RXN-15264	3.99258	2	RXN-13534	4.00273	NIL	RXN-18147	4.19671	3	RXN-16275	3.9487	2	RXN-15730	3.56859	4	RXN0-6512	5.09372	2	RXN-15363	4.79803	NIL	RXN-8762
	RXN-14280	3.75473	1	RXN-14280	3.75473	1	RXN-17798	6.28557	1	OROTATE-REDUCTASE-NADPH-RXN_f	5.5599	1	RXN-11471_f	5.29341	1	RXN-19389	3.54235	1	RIBULP3EPIM-RXN_f	3.59973	5	RXN-17842	3.88771	NIL	2.4.2.12-RXN	3.99929	2	RXN-15971	3.99704	NIL	URIDINE-NUCLEOSIDASE-RXN	4.0035	3	3.2.1.10-RXN	4.19671	3	RXN-19351	3.9525	2	THIAZOLSYN2-RXN	3.56993	2	RXN-3585	5.09888	2	RXN-16243	4.79845	NIL	RXN-11530
	RXN-2221	3.76014	1	RXN-2221	3.76014	1	RXN-20679	6.28557	1	OROTATE-REDUCTASE-NADPH-RXN_r	5.5599	1	RXN-11471_r	5.29341	1	RXN-15805	3.5432	4	RIBULP3EPIM-RXN_r	3.59973	5	RXN-14479	3.89056	NIL	RXN-13207	4.00211	NIL	RXN-17139	3.99964	1	SAMDECARB-RXN	4.00364	4	RXN-19700	4.19983	2	3.2.1.129-RXN	3.95327	3	2.3.1.103-RXN	3.57208	2	RXN-17710	5.10597	2	RXN-19140	4.80126	NIL	RXN-16086
	RXN-16928	3.76276	NIL	RXN-16928	3.76276	NIL	OHACYL-COA-DEHYDROG-RXN	6.28557	1	RXN3O-1070_f	5.56208	1	RXN-16929	5.30803	NIL	STYRENE-OXIDE-ISOMERASE-RXN_f	3.54398	5	ALLANTOIN-RACEMASE-RXN_f	3.59973	5	RXN-18841	3.89207	NIL	RXN-18481	4.00636	3	DOLICHYL-PHOSPHATASE-RXN	4.00016	3	RXN-20557	4.00521	3	RXN-4313	4.20698	NIL	RXN3DJ-25	3.95486	NIL	RXN-17519	3.57274	1	RXN-17711	5.11029	2	SPERMACTRAN-RXN	4.81484	2	RXN-8763
	RXN66-479	3.76496	1	RXN66-479	3.76496	1	RXN66-485	6.28557	NIL	RXN3O-1070_r	5.56208	1	RXN-15015	5.30836	NIL	STYRENE-OXIDE-ISOMERASE-RXN_r	3.54398	5	ALLANTOIN-RACEMASE-RXN_r	3.59973	5	RXN-18847	3.89207	NIL	RXN-16902	4.00796	NIL	RXN-11187	4.00083	2	RXN-13535	4.00605	NIL	RXN-10009	4.20724	2	STRICTOSIDINE-BETA-GLUCOSIDASE-RXN	3.9582	3	RXN-17741	3.57369	3	RXN-15658_f	5.12791	2	RXN0-7165	4.81484	2	RXN-19282
	RXN-16589	3.76496	NIL	RXN-16589	3.76496	NIL	RXN-12570_f	6.28557	1	RXN-13341	5.56271	1	RXN-16740	5.31198	NIL	RXN-12765	3.54398	NIL	TRANS-RXN0-279	3.59973	NIL	RXN-13517	3.89313	NIL	RXN-15791	4.00929	NIL	HEMEOSYN-RXN	4.00115	2	PRPPAMIDOTRANS-RXN_f	4.00659	2	RXN-14616	4.2108	3	RXN-5822	3.96145	3	RXN-10892	3.57953	2	RXN-15658_r	5.12791	2	RXN1G-4	4.82249	2	RXN0-5123
	1.5.1.8-RXN	3.77133	1	1.5.1.8-RXN	3.77133	1	RXN-12570_r	6.28557	1	RXN-14798	5.56983	NIL	CYCLOHEXADIENYL-DEHYDROGENASE-RXN	5.31707	1	RXN-19352	3.54426	3	RXN-11354_f	3.59973	5	RXN-19704	3.89374	2	RXN-19154	4.01405	NIL	RXN-17438	4.00156	NIL	PRPPAMIDOTRANS-RXN_r	4.00659	2	RXN-21055	4.21093	3	RXN-19043	3.96227	NIL	RXN-8454	3.58139	1	RXN-9700	5.13563	2	RXN-15943	4.82572	2	3-CH3-2-OXOBUTANOATE-OH-CH3-XFER-RXN_f
	DXPREDISOM-RXN_f	3.77179	1	DXPREDISOM-RXN_f	3.77179	1	RXN-11662_f	6.28557	1	RXN-4210	5.59828	1	1.3.1.49-RXN_f	5.33117	1	RXN-21192	3.54438	NIL	RXN-11354_r	3.59973	5	RXN-8282_f	3.90067	NIL	PHOSACETYLGLUCOSAMINEMUT-RXN_f	4.01978	5	RXN-13811	4.00343	3	RXN-10620	4.01029	1	RXN-19047	4.22281	NIL	RXN-18044	3.96257	NIL	RXN-20716	3.5816	2	RXN-17715_f	5.13711	2	RXN-14454_f	4.82893	2	3-CH3-2-OXOBUTANOATE-OH-CH3-XFER-RXN_r
	DXPREDISOM-RXN_r	3.77179	1	DXPREDISOM-RXN_r	3.77179	1	RXN-11662_r	6.28557	1	1.3.1.62-RXN	5.60999	1	1.3.1.49-RXN_r	5.33117	1	RXN-13533	3.54472	NIL	GALACTUROISOM-RXN_f	3.59973	5	RXN-8282_r	3.90067	NIL	PHOSACETYLGLUCOSAMINEMUT-RXN_r	4.01978	5	RXN-19333	4.00801	NIL	RXN-13532	4.01251	NIL	RXN-17737	4.22334	3	RXN-15961	3.96356	NIL	RXN-2	3.58298	2	RXN-17715_r	5.13711	2	RXN-14454_r	4.82893	2	RXN-11434
	CHLOROMALERED-RXN	3.77652	1	CHLOROMALERED-RXN	3.77652	1	RXN-12507	6.28557	NIL	RXN-18104	5.63453	NIL	RXN-12560	5.34239	1	RXNQT-4363	3.54927	2	GALACTUROISOM-RXN_r	3.59973	5	RXN-13209	3.9018	NIL	RXN-886	4.02025	NIL	RXN-8220	4.00978	3	RXN-7985	4.01548	NIL	RXN-19299	4.22394	2	RXN-16344	3.96707	1	RXN-8052	3.58441	4	RXN0-5065	5.15822	NIL	RXN-19376	4.8301	2	RXN-15668
	RXN-19329	3.77682	1	RXN-19329	3.77682	1	RXN-17115	6.28557	NIL	N-ACETYLGLUTPREDUCT-RXN_f	5.64446	1	RXN-11245	5.34532	1	RXN-6242	3.54929	1	RXN-14364_f	3.59973	5	RXN-16483	3.90199	3	RXN-12610	4.0231	2	RXN-9991	4.01084	2	RXN-12899	4.01734	3	RXN-21211	4.22559	NIL	RXN-18226	3.96741	3	CHLOROGENATE-HYDROLASE-RXN	3.58654	3	2.3.1.164-RXN	5.16797	2	RXNQT-4163	4.83399	2	RXN-17002
	DIHYDROFOLATEREDUCT-RXN	3.77682	1	DIHYDROFOLATEREDUCT-RXN	3.77682	1	RXN-14275	6.28557	NIL	N-ACETYLGLUTPREDUCT-RXN_r	5.64446	1	RXN-16546	5.3522	NIL	RXN-12240	3.55365	NIL	RXN-14364_r	3.59973	5	AICARSYN-RXN_f	3.90232	4	RXN-17178	4.02816	NIL	RXN-17046	4.01226	NIL	RXN-19504	4.02412	3	RXN-12753	4.22737	NIL	RXN-13274	3.9736	2	RXN-12159	3.58737	NIL	RXN-8713	5.16916	2	CARNITINE-O-ACETYLTRANSFERASE-RXN_f	4.83401	2	1.13.11.25-RXN
	RXN-15615_f	3.79469	1	RXN-15615_f	3.79469	1	RXN-12490	6.28557	1	RXN-9489	5.64517	1	RXN-21337_f	5.35629	NIL	RXN-13171	3.55425	3	RXN-10381	3.59973	4	AICARSYN-RXN_r	3.90232	4	RXN-9674	4.02886	3	RXN-18045	4.01332	NIL	THI-P-SYN-RXN	4.03017	2	RXN-12754	4.22737	NIL	RXN-11258	3.97549	NIL	RXN-12349	3.59006	1	RXN-16019	5.18868	NIL	CARNITINE-O-ACETYLTRANSFERASE-RXN_r	4.83401	2	TETRAHYDROBERBERINE-OXIDASE-RXN
	RXN-15615_r	3.79469	1	RXN-15615_r	3.79469	1	RXN66-479	6.31364	1	RXN-12450_f	5.65743	1	RXN-21337_r	5.35629	NIL	BIPHENYL-23-DIOL-12-DIOXYGENASE-RXN	3.55434	1	RXN-8042	3.59973	5	RXN18C3-12	3.90599	NIL	RXN-14263	4.02989	3	RXN-20784	4.01592	2	RXN-19129	4.03114	1	RXN-14407	4.22795	1	RXN-18763	3.97562	3	RXN-15812	3.59071	NIL	RXN-10699	5.19279	2	RXN-15045	4.84712	2	RXN-19253_f
	RXN-9065	3.79987	NIL	RXN-9065	3.79987	NIL	RXN-16416	6.31485	NIL	RXN-12450_r	5.65743	1	RXN-15799	5.37372	1	BARBITURASE-RXN	3.55673	3	NUCLEOSIDE-DEOXYRIBOSYLTRANSFERASE-RXN	3.59973	2	RXN-20419	3.90709	NIL	THI-P-SYN-RXN	4.03268	2	RXN-17435	4.02086	4	RXN-18070	4.03938	NIL	RXN-12819	4.22995	3	RXN-4314	3.97727	NIL	RXN66-354	3.59142	5	RXN-17703	5.20258	3	RXN-16879	4.85451	NIL	RXN-19253_r
	R23-RXN	3.8035	NIL	R23-RXN	3.8035	NIL	RXN-9802	6.31485	NIL	1.5.1.19-RXN	5.6677	1	RXN-2401	5.37399	1	RXN-10124_f	3.5613	NIL	UDP-GLUCURONATE-4-EPIMERASE-RXN_f	3.59973	5	RXN-21325	3.90716	NIL	RXN-12583	4.03364	NIL	RXN-19361	4.02184	2	ISONOCARDICIN-SYNTHASE-RXN	4.04128	2	RXN-19043	4.23335	NIL	RXN-9851	3.98186	2	RXN-4303	3.59975	2	RXN-4320	5.20553	2	2-ISOPROPYLMALATESYN-RXN	4.85496	2	RXN-19047
	RXN-7660	3.80414	NIL	RXN-7660	3.80414	NIL	GEISSOSCHIZINE-DEHYDROGENASE-RXN	6.31845	1	RXN66-343	5.67839	1	RXN-15464	5.38938	NIL	RXN-10124_r	3.5613	NIL	UDP-GLUCURONATE-4-EPIMERASE-RXN_r	3.59973	5	OROPRIBTRANS-RXN_f	3.90761	2	RXN-19322	4.03453	3	RXN-18563	4.02266	4	RXN-17844	4.04128	2	RXN-8287	4.23537	NIL	RXN-14355	3.98305	NIL	RXN-18751_f	3.60137	5	RXN-11246	5.20927	2	SUCCINATE--COA-LIGASE-GDP-FORMING-RXN_f	4.85923	6	ISONOCARDICIN-SYNTHASE-RXN
	RXN-11565	3.80541	1	RXN-11565	3.80541	1	RXN-16095	6.34587	1	RXN-12886	5.68872	1	RXN-17396_f	5.39813	1	RXN-15649	3.56155	4	RXN-9845_f	3.59973	5	OROPRIBTRANS-RXN_r	3.90761	2	RXN-2223	4.03724	NIL	RXN-16750	4.02453	2	N-ACYLNEURAMINATE-9-PHOSPHATASE-RXN	4.04328	3	RXN-17809	4.23677	4	RXN-8087	3.98824	6	RXN-18751_r	3.60137	5	RXN-4204	5.21921	2	SUCCINATE--COA-LIGASE-GDP-FORMING-RXN_r	4.85923	6	RXN-17844
	RXN-9246	3.80882	1	RXN-9246	3.80882	1	RXN-20345	6.34587	1	RXN-15855	5.69302	1	RXN-17396_r	5.39813	1	RXN-15980	3.56335	NIL	RXN-9845_r	3.59973	5	CPM-KDOSYNTH-RXN	3.91178	2	PRPPAMIDOTRANS-RXN_f	4.039	2	RXN-13177	4.02467	3	RXN0-6254	4.0438	2	RXN0-7092	4.23928	NIL	3.1.2.27-RXN	3.98864	3	RXN-10041	3.60181	3	RXN-19800	5.22859	2	MALATE--COA-LIGASE-RXN_f	4.86446	6	RXN-10930
	D-PINITOL-DEHYDROGENASE-RXN_f	3.81735	1	D-PINITOL-DEHYDROGENASE-RXN_f	3.81735	1	RXN-5901	6.34587	1	RXN-19981	5.69319	1	RXN-13363_f	5.40455	NIL	RXN-11451_f	3.56408	1	RXN-7771	3.59973	NIL	RXN-10672	3.91322	2	PRPPAMIDOTRANS-RXN_r	4.039	2	RXN-12152	4.02511	NIL	RXN-9989	4.04801	3	RXN-10930	4.24013	NIL	HISTCYCLOHYD-RXN	3.99755	3	RXN-10105_f	3.60319	5	RXN-7852	5.28235	2	MALATE--COA-LIGASE-RXN_r	4.86446	6	RXN0-5359
	D-PINITOL-DEHYDROGENASE-RXN_r	3.81735	1	D-PINITOL-DEHYDROGENASE-RXN_r	3.81735	1	RXN-20337	6.34587	1	RXN-19982	5.69319	1	RXN-13363_r	5.40455	NIL	RXN-11451_r	3.56408	1	RXN-17080_f	3.59973	NIL	RXN-15028	3.91385	NIL	RXN-19326	4.03938	3	RXN-21214	4.0256	3	RXN-12610	4.04927	2	RXN0-5227	4.24099	3	RXN-15954	3.99972	NIL	RXN-10105_r	3.60319	5	RXN1G-4	5.30313	2	RXN-10829	4.86478	2	RXN-777
	RXN-9232	3.83131	1	RXN-9232	3.83131	1	RXN-13301	6.34587	1	RXN-8683	5.7162	1	RXN-10841_f	5.40455	1	URATE-OXIDASE-RXN	3.56421	1	RXN-17080_r	3.59973	NIL	RXN-18222_f	3.91806	3	RXN-8770	4.04018	3	THI-P-SYN-RXN	4.02857	2	RXN-17078	4.04991	NIL	RXN-19306	4.24287	2	2.4.1.153-RXN	4.00254	2	RXN-19973	3.60469	NIL	RXN-14492	5.32374	2	GLUCOSAMINE-N-ACETYLTRANSFERASE-RXN_f	4.88053	2	DOLICHYL-PHOSPHATASE-RXN
	CHLORDECONE-REDUCTASE-RXN_f	3.846	1	CHLORDECONE-REDUCTASE-RXN_f	3.846	1	RXN-9544	6.34587	NIL	RXN-8678	5.7162	1	RXN-10841_r	5.40455	1	R313-RXN	3.56568	4	RXN66-25_f	3.59973	5	RXN-18222_r	3.91806	3	6-BETA-HYDROXYHYOSCYAMINE-EPOXIDASE-RXN	4.04236	1	2.5.1.19-RXN_f	4.02953	2	RXN-12238	4.04991	2	KDO-8PSYNTH-RXN	4.24522	2	RXN-16569	4.00254	2	RXN-11753_f	3.60596	NIL	RXN-11220	5.37219	2	GLUCOSAMINE-N-ACETYLTRANSFERASE-RXN_r	4.88053	2	RXN-8793
	CHLORDECONE-REDUCTASE-RXN_r	3.846	1	CHLORDECONE-REDUCTASE-RXN_r	3.846	1	3-HYDROXYBUTYRYL-COA-DEHYDROGENASE-RXN	6.34587	1	RXN-11934	5.75628	NIL	RXN66-350_f	5.41251	1	R181-RXN	3.56617	3	RXN66-25_r	3.59973	5	2.4.1.149-RXN	3.92028	2	RXN-19310	4.04356	3	2.5.1.19-RXN_r	4.02953	2	RXN-10002	4.04991	2	RXN-13532	4.24573	NIL	RXN-8770	4.00736	3	RXN-11753_r	3.60596	NIL	RXN-13442	5.37588	NIL	2.3.1.131-RXN	4.89874	2	RXN-8698
	RXN-5921	3.85908	1	RXN-5921	3.85908	1	RXN-13299	6.34587	1	RXN-15357_f	5.76199	NIL	RXN66-350_r	5.41251	1	RXN-17351	3.56748	1	4.2.1.99-RXN_f	3.59973	4	RXN-13275	3.92107	2	RXN-12899	4.0489	3	RXN-6261	4.03109	6	RXN-20733	4.05085	3	RXN-17380	4.24761	3	GSPAMID-RXN_f	4.00773	3	RXN-16270	3.60749	1	RXN-11254	5.39222	NIL	LYSACET-RXN	4.91014	NIL	RXN-9852
	RXN0-6565_f	3.86313	1	RXN0-6565_f	3.86313	1	RXN-17109	6.34587	1	RXN-15357_r	5.76199	NIL	R267-RXN	5.41823	NIL	RXN-21232	3.57363	1	4.2.1.99-RXN_r	3.59973	4	RXN-11072	3.92123	NIL	RXN-19320	4.04926	3	RXN-13534	4.03303	NIL	RXN0-262	4.05229	2	RXN-12320	4.24856	2	GSPAMID-RXN_r	4.00773	3	RXN-19590	3.61068	3	RXN-11221	5.42318	2	RXN-16663	4.91247	NIL	RXN-21376
	RXN0-6565_r	3.86313	1	RXN0-6565_r	3.86313	1	RXN-13279_f	6.34587	1	KYNURENINE-3-MONOOXYGENASE-RXN	5.77524	1	RXN-905	5.4306	NIL	RXN-19756	3.57429	NIL	RXN-15226	3.59973	NIL	RXN-19769	3.92185	3	ISOMALTULOSE-SYNTHASE-RXN_f	4.04984	5	2.5.1.42-RXN	4.03324	2	RXN-9991	4.0539	2	RXN-19229	4.25684	2	RXN-16274	4.0117	2	RXN-18443	3.61666	2	RXN-18840	5.43704	3	RXN18C3-33	4.9161	NIL	RXN-18071
	RXN-14880	3.86421	NIL	RXN-14880	3.86421	NIL	RXN-13279_r	6.34587	1	RXN-4144	5.77572	1	PCP4MONO-RXN	5.44384	1	RXN-12364	3.57664	NIL	RXN-11993	3.59973	NIL	RXN-13277	3.92225	2	ISOMALTULOSE-SYNTHASE-RXN_r	4.04984	5	COBINAMIDEKIN-RXN	4.03419	2	RXN-12819	4.05482	3	RXN-11490	4.25939	2	RXN-19360	4.01249	2	RXN-14181	3.61701	3	RXN-20424	5.45414	NIL	RXN18C3-28	4.91762	NIL	RXN-13532
	RXN-13363_f	3.86474	NIL	RXN-13363_f	3.86474	NIL	RXN-16129	6.34587	1	RXN-8684	5.78167	1	RXN-15465	5.4457	NIL	RXN-11542	3.5805	1	5.1.1.15-RXN_f	3.59973	5	RXN-11664	3.92238	3	RXN-12819	4.0506	3	RXN-15912	4.03845	NIL	R346-RXN	4.05605	3	RXN-20544	4.26011	3	RXN-15295	4.01272	1	2.3.1.92-RXN	3.61709	2	AGMATINE-N4-COUMAROYLTRANSFERASE-RXN	5.45986	2	RXN-11130	4.93017	NIL	THI-P-SYN-RXN
	RXN-13363_r	3.86474	NIL	RXN-13363_r	3.86474	NIL	RXN-20341	6.34587	1	RXN-8679	5.78167	1	RXN-19428	5.44621	1	RXN-8040	3.58242	5	5.1.1.15-RXN_r	3.59973	5	RXN-11290	3.9236	3	N-ACETYLNEURAMINATE-SYNTHASE-RXN	4.05127	2	RXN-13535	4.03878	NIL	AIRCARBOXY-RXN_f	4.05846	4	RXN-17516	4.26586	2	RXN-19322	4.01427	3	RXN-13123	3.62083	3	RXN-9311	5.49766	3	RXN-13871	4.93607	2	RXN-8475
	RXN-10841_f	3.86474	1	RXN-10841_f	3.86474	1	RXN-7698	6.34587	1	RXN-7911	5.78639	NIL	RXN-5682	5.45947	1	RXN-15016	3.58279	NIL	RXN-18196_f	3.59973	4	UDP-NACMUR-ALA-LIG-RXN	3.92461	6	RXN-19323	4.05148	3	BTUR2-RXN	4.04134	2	AIRCARBOXY-RXN_r	4.05846	4	RXN-16788	4.26601	3	R268-RXN	4.02102	NIL	RXN-13088	3.62166	1	7KAPSYN-RXN	5.51423	2	HISTIDINE-N-ACETYLTRANSFERASE-RXN_f	4.94455	2	RXN-11531
	RXN-10841_r	3.86474	1	RXN-10841_r	3.86474	1	RXN-13300	6.34587	1	RXN-17335	5.79271	1	HADTHAUERA-RXN_f	5.46022	1	RXN-14865	3.58644	3	RXN-18196_r	3.59973	4	RXN-11663	3.92583	2	RXN-14837	4.05194	2	3.2.1.18-RXN	4.04178	3	RXN-12728	4.0654	NIL	RXN-17053	4.26652	NIL	RXN-16253	4.02199	NIL	RXN-4510	3.62172	2	RXN-904	5.52348	NIL	HISTIDINE-N-ACETYLTRANSFERASE-RXN_r	4.94455	2	RXN-13275
	RXN-16796	3.86528	1	RXN-16796	3.86528	1	RXN-20380	6.34587	1	CORTISONE-ALPHA-REDUCTASE-RXN	5.80941	1	HADTHAUERA-RXN_r	5.46022	1	RXN-16709	3.59429	NIL	BISPHOSPHOGLYCERATE-MUTASE-RXN	3.59973	5	RXN-13630	3.92713	NIL	RXN-19324	4.05269	3	RXN-17045	4.04828	NIL	RXN-20582	4.06561	1	RXN-15224	4.27046	2	RXN-18036	4.02634	NIL	2.3.1.91-RXN	3.62176	2	RXN-8715	5.54103	2	RXN-15327	4.95787	NIL	GLYCINE-N-CHOLOYLTRANSFERASE-RXN
	RXN-16262	3.88231	1	RXN-16262	3.88231	1	RXN-16154	6.34587	1	CORTISONE-BETA-REDUCTASE-RXN_f	5.80941	1	ESTRADIOL-17-BETA-DEHYDROGENASE-RXN	5.48548	1	RXN-16710	3.59429	NIL	UDP-N-ACETYLGLUCOSAMINE-4-EPIMERASE-RXN_f	3.59973	5	RXN66-496	3.9298	3	ACNEULY-RXN_f	4.05415	4	RXN-13210	4.05392	NIL	RXN-9674	4.07059	3	RXN-14285	4.27278	2	RXN-16711	4.02944	4	RXN-13332	3.62464	3	RXN-8859	5.55103	NIL	RXN-8204	4.95787	2	RXN-8857
	RXN-13564	3.88453	NIL	RXN-13564	3.88453	NIL	RXN-18003	6.346	NIL	CORTISONE-BETA-REDUCTASE-RXN_r	5.80941	1	RXN-20144	5.48947	NIL	3.7.1.9-RXN	3.59507	3	UDP-N-ACETYLGLUCOSAMINE-4-EPIMERASE-RXN_r	3.59973	5	RXN-14429	3.93332	3	ACNEULY-RXN_r	4.05415	4	RXN-9310	4.06585	4	RXN-18217	4.07842	3	RXN-15945	4.2813	2	RXN-19629	4.03466	1	RXN-15980	3.62647	NIL	2.3.1.154-RXN	5.55982	2	RXN-14905	4.96168	2	RXN0-1842
	RXN3O-127	3.89003	1	RXN3O-127	3.89003	1	RXN-4224	6.36568	NIL	RXN-11472_f	5.81585	1	RXN-9290	5.49068	1	RXN-9736	3.5952	2	RXN-14636_f	3.59973	4	RXN-8793	3.93401	4	RXN-15313	4.05415	4	H2NEOPTERINP3PYROPHOSPHOHYDRO-RXN	4.06789	3	RXN-18218	4.07842	3	RXN-14856	4.28225	NIL	RXN-13694	4.03795	3	SUCCGLUDESUCC-RXN	3.6273	3	RXN-21154	5.56114	NIL	CITSYN-RXN	4.96168	2	RXN-4222
	1.1.1.222-RXN	3.89118	1	1.1.1.222-RXN	3.89118	1	RXN-7659	6.40104	NIL	RXN-11472_r	5.81585	1	RXN-17976	5.51235	1	RXN0-5040	3.59552	NIL	RXN-14636_r	3.59973	4	RXN-16509	3.94346	3	RXN-13212_f	4.0576	NIL	RXN0-5216	4.07062	NIL	RXN-11182	4.07842	3	RXN-12153	4.28657	NIL	RXN-17998	4.03899	NIL	RXN-8093	3.62989	1	RXN-10700	5.56718	2	RXN-18387	4.98638	6	RXN-8677
	MHPHYDROXY-RXN	3.90301	1	MHPHYDROXY-RXN	3.90301	1	RXN-12789_f	6.41267	1	RXN-11471_f	5.81585	1	1.14.13.101-RXN	5.52022	1	2-OH-6-OXOHEPTA-2-4-DIENOATE-HYDR-RXN	3.596	3	N-ACYLGLUCOSAMINE-2-EPIMERASE-RXN_f	3.59973	5	RXN-8288	3.94627	NIL	RXN-13212_r	4.0576	NIL	RXN-18073	4.07164	NIL	RXN-8134	4.07842	3	RXN-17832	4.28688	3	CHLOROGENATE-HYDROLASE-RXN	4.03954	3	RXN-15777	3.63004	NIL	RXN-20427	5.57645	NIL	RXN-17563	4.99046	NIL	RXN-7981
	GAPDHSYNEC-RXN_f	3.90884	1	GAPDHSYNEC-RXN_f	3.90884	1	RXN-12789_r	6.41267	1	RXN-11471_r	5.81585	1	RXN-20193	5.5211	1	RXN-20582	3.59749	1	N-ACYLGLUCOSAMINE-2-EPIMERASE-RXN_r	3.59973	5	RXN-11501	3.94977	3	RXN-8144	4.05772	4	RXN-12920	4.07245	NIL	RXN-18227	4.07842	3	R346-RXN	4.28703	3	RXN-6242	4.04144	1	3.1.1.56-RXN	3.63251	3	PYFLAVOXRE-RXN_f	5.57864	1	RXN-9382	4.99112	2	RXN-17166
	GAPDHSYNEC-RXN_r	3.90884	1	GAPDHSYNEC-RXN_r	3.90884	1	RXN-14743	6.4174	NIL	RXN-14818	5.82133	1	RXN-15601	5.52248	NIL	RXN-18554	3.59782	4	RXN-13641_f	3.59973	5	RXN-13514	3.95	NIL	RXN-12357	4.05812	3	RXN-13207	4.07347	NIL	RXN-18216	4.07842	3	RXN-14980	4.29378	3	2.3.1.131-RXN	4.04357	2	RXN-13155	3.63569	NIL	PYFLAVOXRE-RXN_r	5.57864	1	R102-RXN_f	4.99938	2	3.1.2.27-RXN
	PHTHALATE-45-DIOXYGENASE-RXN	3.91427	1	PHTHALATE-45-DIOXYGENASE-RXN	3.91427	1	TRYPTOPHAN-DEHYDROGENASE-RXN_f	6.42746	1	RXN0-6444	5.82723	1	RXN-13344	5.52971	1	RXN-6201	3.59876	4	RXN-13641_r	3.59973	5	2.1.1.86-RXN_f	3.95962	2	SAMDECARB-RXN	4.05895	4	RXN-14948	4.07396	5	RXN-18219	4.07842	3	STERYL-SULFATASE-RXN	4.29617	3	NAD+-ADP-RIBOSYLTRANSFERASE-RXN_f	4.04418	2	RXN-15961	3.63604	NIL	RXN-13094	5.5904	NIL	R102-RXN_r	4.99938	2	RXN-14289
	RXN-9397	3.91754	1	RXN-9397	3.91754	1	TRYPTOPHAN-DEHYDROGENASE-RXN_r	6.42746	1	RXN-16539	5.82804	NIL	RXN-15029	5.53388	NIL	RXN-14174	3.59902	3	NANE-RXN_f	3.59973	5	2.1.1.86-RXN_r	3.95962	2	RXN-15332	4.05952	NIL	RXN-8768	4.07608	5	RXN-19339	4.07911	2	RXN-14479	4.29745	NIL	NAD+-ADP-RIBOSYLTRANSFERASE-RXN_r	4.04418	2	RXN-15417_f	3.63679	2	RXN-10701	5.59234	2	RXN1R65-39	4.99948	NIL	HEME-OXYGENASE-DECYCLIZING-RXN
	RXN-13402	3.91938	1	RXN-13402	3.91938	1	RXN0-2044_f	6.43479	1	RXN-14495	5.83189	1	RXN-13382	5.53495	NIL	RXN-19390	3.60288	1	NANE-RXN_r	3.59973	5	RXN-4303	3.96419	2	N-ACYLNEURAMINATE-9-PHOSPHATASE-RXN	4.06244	3	RXN-13204	4.08105	3	RXN-18659	4.08173	3	RXN-21034	4.29776	NIL	RXN-13534	4.04666	NIL	RXN-15417_r	3.63679	2	RXN-14274	5.62874	2	RXN-12547	5.0119	2	RXN-20169
	RXN-16930	3.92347	NIL	RXN-16930	3.92347	NIL	RXN0-2044_r	6.43479	1	RXN-15367	5.85232	1	RXN-15607	5.53846	NIL	RXN-19136	3.60497	NIL	RXN-19840_f	3.59973	NIL	RXN-7064	3.96457	NIL	RXN-17514_f	4.06308	4	RXN-2222	4.08511	NIL	RXN-9310	4.08723	4	AICARSYN-RXN_f	4.29842	4	RXN-18563	4.04758	4	RXN-8612	3.63695	1	RXN-12161	5.64538	NIL	SUCCCOASYN-RXN_f	5.01549	6	RXN-21034
	TRYPTOPHAN-DEHYDROGENASE-RXN_f	3.92481	1	TRYPTOPHAN-DEHYDROGENASE-RXN_f	3.92481	1	RXN-16754	6.43883	NIL	RXN-11506	5.85481	NIL	OMEGA-HYDROXYDECANOATE-DEHYDROGENASE-RXN_f	5.53995	1	RXN-18090	3.60597	NIL	RXN-19840_r	3.59973	NIL	RXN-16750	3.96568	2	RXN-17514_r	4.06308	4	RXN-17447	4.08817	NIL	STERYL-SULFATASE-RXN	4.08983	3	AICARSYN-RXN_r	4.29842	4	1.1.3.34-RXN	4.04878	1	RXN-19287	3.63786	1	RXN-2601	5.64625	2	SUCCCOASYN-RXN_r	5.01549	6	RXN-16582
	TRYPTOPHAN-DEHYDROGENASE-RXN_r	3.92481	1	TRYPTOPHAN-DEHYDROGENASE-RXN_r	3.92481	1	RXN-7591	6.44234	NIL	RXN-21337_f	5.86643	NIL	OMEGA-HYDROXYDECANOATE-DEHYDROGENASE-RXN_r	5.53995	1	RXN-12612	3.60877	NIL	FCLEPIM-RXN	3.59973	NIL	RXN-8884	3.96666	NIL	RXN-19319	4.06464	3	RXN0-7002	4.08838	3	RXN-17380	4.09015	3	RXN-15376_f	4.29937	2	RXN-18058	4.05188	NIL	RXN-21277	3.63836	NIL	TYRAMINE-N-FERULOYLTRANSFERASE-RXN_f	5.66291	2	RXN-18373_f	5.02797	2	RXN-11485
	RXN-16884	3.92566	NIL	RXN-16884	3.92566	NIL	RXN-9159	6.46687	1	RXN-21337_r	5.86643	NIL	RXN-16884	5.54244	NIL	RXN-12073	3.61102	1	RXN-14707	3.59973	5	RXN-15730	3.96703	4	RXN-8450	4.07862	1	NAD+-ADP-RIBOSYLTRANSFERASE-RXN_f	4.08945	2	RXN-15264	4.09495	2	RXN-15376_r	4.29937	2	RXN-13630	4.05336	NIL	RXN-18073	3.63842	NIL	TYRAMINE-N-FERULOYLTRANSFERASE-RXN_r	5.66291	2	RXN-18373_r	5.02797	2	RXN-8344
	RXN-16590	3.94387	NIL	RXN-16590	3.94387	NIL	RXN-9158	6.46687	1	RXN-14486	5.86844	1	RXN-2221	5.56146	1	RXN-13643	3.61157	1	STEROID-DELTA-ISOMERASE-RXN_f	3.59973	5	R345-RXN	3.96741	6	RXNQT-4341	4.08047	NIL	NAD+-ADP-RIBOSYLTRANSFERASE-RXN_r	4.08945	2	RXN-18106	4.09718	NIL	RXN-10755_f	4.3	2	RXN-12845	4.05558	5	3.5.1.80-RXN	3.63937	3	2.3.1.133-RXN	5.66327	2	RXN-10837	5.03154	2	RXN-16251
	4-SULFOBENZOATE-34-DIOXYGENASE-RXN	3.94676	1	4-SULFOBENZOATE-34-DIOXYGENASE-RXN	3.94676	1	RXN-17967	6.46723	1	RXN-14859_f	5.87558	1	RXN-14715	5.57078	NIL	RXN-16711	3.61276	4	STEROID-DELTA-ISOMERASE-RXN_r	3.59973	5	RXN-13574	3.97134	3	ATPPHOSPHORIBOSYLTRANS-RXN_f	4.08148	2	RXN-12744	4.09215	NIL	RXN-15654	4.09902	NIL	RXN-10755_r	4.3	2	CERAMIDASE-RXN	4.05675	3	NAG6PDEACET-RXN	3.63937	3	RXN-21156	5.69478	NIL	RXN-8170	5.04405	NIL	RXN-4230
	OROTATE-REDUCTASE-NADPH-RXN_f	3.94953	1	OROTATE-REDUCTASE-NADPH-RXN_f	3.94953	1	RXN-21377	6.46784	NIL	RXN-14859_r	5.87558	1	1.3.1.60-RXN_f	5.57094	1	RXN-2223	3.61304	NIL	LACTATE-RACEMASE-RXN_f	3.59973	5	RXN-10001	3.97134	3	ATPPHOSPHORIBOSYLTRANS-RXN_r	4.08148	2	RXN-12675_f	4.09489	5	GLYOXII-RXN	4.10043	3	RXN-14861	4.30443	NIL	THIOSULFATE--THIOL-SULFURTRANSFERASE-RXN_f	4.05895	2	RXN0-6575	3.64212	4	RXN-21157	5.69727	NIL	RXN-14268	5.04456	2	RXN-4303
	OROTATE-REDUCTASE-NADPH-RXN_r	3.94953	1	OROTATE-REDUCTASE-NADPH-RXN_r	3.94953	1	RXN-13291	6.47269	1	RXN-12997	5.8957	1	1.3.1.60-RXN_r	5.57094	1	PREPHENATE-TRANSAMINE-RXN_f	3.61389	2	LACTATE-RACEMASE-RXN_r	3.59973	5	RXN-19139	3.98189	NIL	RXN-15805	4.08228	4	RXN-12675_r	4.09489	5	RXN-18493	4.10158	3	RXN-18841	4.30473	NIL	THIOSULFATE--THIOL-SULFURTRANSFERASE-RXN_r	4.05895	2	RXN-12790	3.64553	5	RXN-15331	5.73511	NIL	RXN-7743	5.06754	2	RXN-10888
	RXN-13081	3.95081	1	RXN-13081	3.95081	1	RXN-16566	6.49994	NIL	1.1.1.64-RXN	5.92357	1	NAPHTHALENE-12-DIOXYGENASE-RXN	5.57242	1	PREPHENATE-TRANSAMINE-RXN_r	3.61389	2	RXN-14783	3.59973	NIL	RXN-17042	3.98218	NIL	RXN0-5409	4.08251	NIL	RXN-11459	4.09508	NIL	RXN-2223	4.10232	NIL	RXN-18847	4.30473	NIL	RXN0-5507	4.06042	4	RXN-11368	3.64605	2	RXN-10708	5.74482	3	N-ACETYLTRANSFER-RXN_f	5.08206	2	RXN0-6254
	RXN-17981	3.95118	1	RXN-17981	3.95118	1	RXN-12930	6.49994	NIL	RXN-17396_f	5.92675	1	GLUTSEMIALDEHYDROG-RXN	5.57682	1	RXN-21196	3.61939	NIL	ASPARTATE-RACEMASE-RXN	3.59973	5	RXN-11187	3.98665	2	RXN-9989	4.08321	3	RXN-16788	4.0957	3	ATP-ADENYLYLTRANSFERASE-RXN_f	4.10793	2	RXNQT-4344	4.30761	NIL	RXN-15742	4.06076	NIL	RXN-17684	3.64765	NIL	RXN-8714	5.75647	2	N-ACETYLTRANSFER-RXN_r	5.08206	2	RXN-16934
	HYDROXYPHENYLPYRUVATE-REDUCTASE-RXN	3.95217	1	HYDROXYPHENYLPYRUVATE-REDUCTASE-RXN	3.95217	1	RXN-12921	6.49994	NIL	RXN-17396_r	5.92675	1	RXN-17409	5.57867	1	HISTCYCLOHYD-RXN	3.62073	3	RXN-14759	3.59973	NIL	RXN-8342	3.99182	2	RXN-8344	4.08464	2	RXN-14856	4.09637	NIL	ATP-ADENYLYLTRANSFERASE-RXN_r	4.10793	2	RXN-8798	4.30963	NIL	DHS-PHOSPHATASE-RXN	4.06295	NIL	RXN-10902	3.64794	NIL	RXN-10825	5.76515	NIL	RXN-13435	5.08477	3	RXN-20166
	RXN-17339	3.95267	1	RXN-17339	3.95267	1	RXN-12929	6.49994	NIL	RXN-16742	5.94902	NIL	RXN-16931	5.58183	NIL	4.99.1.7-RXN	3.62087	4	RXN66-320_f	3.59973	5	RXN-13274	3.99668	2	RXN-20580	4.09441	1	RXN-14861	4.09817	NIL	RXN-21034	4.11073	NIL	RXN-14703	4.30971	3	SPHINGANINE-1-PHOSPHATE-ALDOLASE-RXN	4.06418	4	RXN-10903	3.64794	NIL	ATP-CITRATE-PRO-S--LYASE-RXN	5.77293	2	RXN-18530	5.08927	2	RXN-9851
	RXN-12940	3.95377	NIL	RXN-12940	3.95377	NIL	RXN-4229	6.50065	NIL	RXN-15819	5.9518	1	1.1.1.210-RXN_f	5.59452	1	RXN-17156	3.62434	NIL	RXN66-320_r	3.59973	5	RXN-18271	3.99679	2	3.1.3.70-RXN	4.09493	3	RXN0-1862	4.10316	2	3.3.2.2-RXN	4.11326	3	RXN-4303	4.31081	2	TEICHOICSYN5-RXN	4.06467	2	RXN-19769	3.64827	3	RXN-2622_f	5.77679	NIL	HOMOCITRATE-SYNTHASE-RXN_f	5.09869	2	RXN-17837
	RXN-17421	3.96512	NIL	RXN-17421	3.96512	NIL	RXN-15114	6.50515	NIL	RETINOL-DEHYDROGENASE-RXN_f	5.96283	1	1.1.1.210-RXN_r	5.59452	1	RXN-7946	3.62588	5	RXN-11876	3.59973	NIL	3.5.1.26-RXN	4.00034	3	RXN-18576	4.09657	4	RXN-8761	4.10435	NIL	2.4.2.12-RXN	4.11436	2	RXN-17138	4.31153	1	RXN-17308	4.06746	2	RXN-17705	3.64919	NIL	RXN-2622_r	5.77679	NIL	HOMOCITRATE-SYNTHASE-RXN_r	5.09869	2	3.1.1.82-RXN
	RXN-8825	3.96882	1	RXN-8825	3.96882	1	1.1.1.266-RXN	6.52902	1	RETINOL-DEHYDROGENASE-RXN_r	5.96283	1	RXN-13478	5.62722	1	RXN-20735	3.62812	3	RXN-18188_f	3.59973	NIL	RXN-13532	4.00153	NIL	RXN-18493	4.09943	3	RXN-13181	4.10614	3	RXN-16711	4.11528	4	RXN-15971	4.32113	NIL	RXN-18066	4.06826	NIL	5.4.99.14-RXN	3.65065	5	RXN-2621	5.8092	NIL	RXN-19490_f	5.10735	2	RXN-7733
	RXN-16799	3.97489	1	RXN-16799	3.97489	1	DTDPDEHYRHAMREDUCT-RXN_f	6.52902	1	RXN-12562	5.96283	NIL	RXN-13342	5.62891	1	RXN-12335_f	3.63218	4	RXN-18188_r	3.59973	NIL	RXN-20710	4.00202	6	DOLICHYL-PHOSPHATASE-RXN	4.10018	3	RXN-19336	4.11115	NIL	RXN-18484	4.11546	3	RXN-12356	4.32633	3	RXN-21215	4.06843	NIL	RXN-16912	3.65345	NIL	RXN-7633	5.82373	2	RXN-19490_r	5.10735	2	FADSYN-RXN_f
	RXN-15027	3.98481	NIL	RXN-15027	3.98481	NIL	DTDPDEHYRHAMREDUCT-RXN_r	6.52902	1	RXN-12577	5.96283	NIL	RXN-13402	5.63481	1	RXN-12335_r	3.63218	4	RXN-9983_f	3.59973	5	RXN-19300	4.00686	2	3.4.17.13-RXN	4.10098	3	RXN-19358	4.11119	2	DOLICHYL-PHOSPHATASE-RXN	4.11603	3	RXN-18260	4.32733	2	4.2.3.12-RXN	4.06857	4	RXN0-5227	3.65444	3	RXN-12777	5.85743	NIL	RXN-15329	5.11898	NIL	FADSYN-RXN_r
	RXN-8820	3.98588	1	RXN-8820	3.98588	1	RXN-16479	6.52985	1	RXN-5284	5.98598	NIL	RXN-19803	5.64001	1	3.1.4.2-RXN	3.63223	3	RXN-9983_r	3.59973	5	RXN-13819	4.00918	NIL	RXN-17406	4.10135	2	RXN-20322	4.11144	NIL	RXN-4221	4.11674	NIL	CYCLOEUCALENOL-CYCLOISOMERASE-RXN	4.32879	5	STERYL-SULFATASE-RXN	4.07009	3	RXN0-3942	3.65712	3	RXN-21158	5.86658	NIL	MALSYN-RXN	5.1246	2	RXN-16427
	RXN-16797	3.98588	1	RXN-16797	3.98588	1	RXNQT-4192	6.53073	NIL	RXN-20920	6.00523	NIL	2-HYDROXYBIPHENYL-3-MONOOXYGENASE-RXN	5.6561	1	RXN-18951	3.63436	1	RXNQT-4167	3.59973	4	RXN-18773	4.0107	2	RXN-18105	4.10214	NIL	RXN-14703	4.11197	3	RXN-10966	4.11817	3	RXN-10647	4.33053	NIL	RXN-13535	4.07295	NIL	FUMARYLACETOACETASE-RXN	3.65801	3	RXN-8988	5.89884	6	RXN0-6948	5.13522	2	RXN-15805
	OCTADECANAL-DECARBONYLASE-RXN	3.99462	4	OCTADECANAL-DECARBONYLASE-RXN	3.99462	4	RXN-16551	6.53073	1	1.1.1.248-RXN_f	6.00622	1	RXN-19797	5.6586	NIL	RXN-6321	3.6351	NIL	GLUCOSE-6-PHOSPHATE-1-EPIMERASE-RXN_f	3.59973	5	RXN-19798	4.01233	NIL	RXN-9048	4.10379	1	RXNQT-4344	4.11515	NIL	RXN-8073	4.11923	NIL	RXN-8768	4.33112	5	RXN-11434	4.07624	3	R608-RXN	3.65806	3	RXN-16473_f	5.90044	2	RXN-12667	5.13865	NIL	RXN-13971
	2-HYDROXYBIPHENYL-3-MONOOXYGENASE-RXN	3.9998	1	2-HYDROXYBIPHENYL-3-MONOOXYGENASE-RXN	3.9998	1	RXN-16555	6.53073	1	1.1.1.248-RXN_r	6.00622	1	RXN-17414	5.67117	1	RXN-22	3.63582	4	GLUCOSE-6-PHOSPHATE-1-EPIMERASE-RXN_r	3.59973	5	RXN-10608	4.01277	2	RXN-14865	4.10521	3	RXN-18070	4.1154	NIL	RXN-14407	4.11956	1	RXN-11187	4.33401	2	RXN-18065	4.0843	NIL	RXNQT-4322	3.66061	4	RXN-16473_r	5.90044	2	RXN-16472_f	5.15621	2	RXN-8798
	RXN-17223	4.00396	NIL	RXN-17223	4.00396	NIL	RXN-7658	6.57045	NIL	RXN-14493	6.01279	1	RXN-17412_f	5.67117	1	RXN0-3942	3.63598	3	MALEATE-ISOMERASE-RXN_f	3.59973	5	RXN-16748	4.01282	2	RXN-4221	4.10529	NIL	CHORISMATE-SYNTHASE-RXN	4.11908	4	RXN-8798	4.12194	NIL	2.4.1.216-RXN_f	4.33441	2	RXN-4303	4.08455	2	RXN-11984	3.66199	NIL	2.3.1.99-RXN_f	5.97407	2	RXN-16472_r	5.15621	2	6.3.1.9-RXN
	RXN66-478	4.00517	1	RXN66-478	4.00517	1	RXN-15030	6.58166	NIL	RXNQT-4334	6.01592	1	RXN-17412_r	5.67117	1	RXN-8987	3.63606	2	MALEATE-ISOMERASE-RXN_r	3.59973	5	RXN-15635	4.01572	2	RXN-8810	4.10808	2	RXN-11112	4.12358	3	GLYCOSYLCERAMIDASE-RXN	4.12278	3	2.4.1.216-RXN_r	4.33441	2	RXN-15333	4.09117	NIL	RXN-16711	3.66284	4	2.3.1.99-RXN_r	5.97407	2	RXN-20145	5.18277	NIL	RXN-13337
	RXN-16924	4.00701	NIL	RXN-16924	4.00701	NIL	RXN-13389	6.63674	NIL	1.1.1.176-RXN_f	6.0166	1	PREPHENATEDEHYDROG-RXN	5.68721	1	ARYL-ACYLAMIDASE-RXN	3.6361	3	5.1.1.18-RXN_f	3.59973	5	RXN-5463	4.01622	2	3.3.2.2-RXN	4.10814	3	RXN-9992	4.12501	3	RXN-20669	4.13149	3	4.2.2.15-RXN	4.3353	4	RXN-16130	4.09413	4	RXN66-351_f	3.66447	5	ACETATE--COA-LIGASE-ADP-FORMING-RXN_f	5.98734	6	RXN-19799	5.18389	NIL	RXN-4231
	RXN-13476	4.01013	1	RXN-13476	4.01013	1	RXN-16656	6.64689	1	1.1.1.176-RXN_r	6.0166	1	RXN-17341_f	5.68803	1	1.14.11.26-RXN	3.63646	1	5.1.1.18-RXN_r	3.59973	5	RXN-12919	4.02156	NIL	RXN-18554	4.11001	4	RXN-15805	4.12602	4	RXN-14633	4.13283	3	RXN-18246	4.33674	2	CYCLOEUCALENOL-CYCLOISOMERASE-RXN	4.09481	5	RXN66-351_r	3.66447	5	ACETATE--COA-LIGASE-ADP-FORMING-RXN_r	5.98734	6	SERINE-O-ACETTRAN-RXN	5.18765	2	RXN-18763
	RXN-20140	4.03571	1	RXN-20140	4.03571	1	RXN-19861	6.65722	NIL	7-ALPHA-HYDROXYSTEROID-DEH-RXN	6.0224	1	RXN-17341_r	5.68803	1	RXN-9030	3.63801	3	RXN-8650	3.59973	3	RXN-16778	4.02558	2	RXN-11290	4.11063	3	RXN-19051	4.12653	4	RXN-11753_f	4.13554	NIL	RXN-16086	4.33694	NIL	RXN18C3-13	4.0951	NIL	RXN-17693	3.66481	1	RXN-8857	6.00874	NIL	IMIDAZOLE-N-ACETYLTRANSFERASE-RXN_f	5.23564	2	RXN-8699
	RXN-15824	4.03571	1	RXN-15824	4.03571	1	UGD-RXN	6.70863	1	RXN-19983	6.023	NIL	R201-RXN	5.68901	NIL	3.1.1.82-RXN	3.64021	3	NOCARDICIN-A-EPIMERASE-RXN_f	3.59973	5	RXN-2882	4.02647	4	LYSOPHOSPHOLIPASE-RXN	4.11219	3	RXN-19335	4.1271	2	RXN-11753_r	4.13554	NIL	RXN-18247	4.33907	2	RXN-17206	4.0951	2	RXN-21278	3.66637	NIL	RXN-13728_f	6.10891	2	IMIDAZOLE-N-ACETYLTRANSFERASE-RXN_r	5.23564	2	RXN-15747
	PERILLYL-ALCOHOL-DEHYDROGENASE-RXN	4.03571	1	PERILLYL-ALCOHOL-DEHYDROGENASE-RXN	4.03571	1	GLYOXYLATE-DEHYDROGENASE-ACYLATING-RXN_f	6.72321	1	RXN-11390	6.02585	1	RXN-15466	5.6995	NIL	3.5.1.91-RXN	3.64309	3	NOCARDICIN-A-EPIMERASE-RXN_r	3.59973	5	RXN-8081	4.02904	6	CHOLOYLGLYCINE-HYDROLASE-RXN	4.11805	3	RXN-18260	4.12749	2	RXN-20581	4.13577	1	RXN-4305	4.34024	2	UROPORIIIMETHYLTRANSA-RXN	4.09703	NIL	RXN66-362	3.66719	5	RXN-13728_r	6.10891	2	RXN-15044	5.24642	2	RXN-8976
	RXN1YI0-11	4.04769	1	RXN1YI0-11	4.04769	1	GLYOXYLATE-DEHYDROGENASE-ACYLATING-RXN_r	6.72321	1	RXN-19429	6.03144	1	RXN-12750	5.70795	1	RXN-10769	3.64386	3	RXN-9160	3.59973	5	RXN-20645	4.03182	2	RIBOFLAVINASE-RXN_f	4.12171	3	UDPACYLGLCNACDEACETYL-RXN	4.1286	3	RXN-13424	4.14199	NIL	RXNQT-4341	4.34067	NIL	RXN-19323	4.09807	3	RXN-19573	3.67023	2	RXN-18371_f	6.14148	2	RXN-18567	5.25036	2	RXN-13972
	ISOPIPERITENOL-DEHYDROGENASE-RXN	4.0674	1	ISOPIPERITENOL-DEHYDROGENASE-RXN	4.0674	1	RXN-15053	6.72481	NIL	RXN-16579	6.03475	NIL	RXN-14792	5.71278	NIL	RXN-21082	3.64492	1	RXN-17392	3.59973	NIL	RXN-18298	4.0323	NIL	RIBOFLAVINASE-RXN_r	4.12171	3	RXN-20788	4.13065	3	RXN-13907	4.14245	1	RXN-14430	4.34539	1	RXN-19326	4.10035	3	3.4.17.11-RXN	3.67141	3	RXN-18371_r	6.14148	2	RXN-17963	5.27496	2	RXN-9800
	GAPOXNPHOSPHN-RXN_f	4.06753	1	GAPOXNPHOSPHN-RXN_f	4.06753	1	RXN-19871	6.72486	NIL	RXN-12971	6.04555	1	PHENYLALANINE-DEHYDROGENASE-RXN	5.71506	1	RXN0-3543	3.64493	NIL	ALDOSE-1-EPIMERASE-RXN_f	3.59973	5	RXN-8124	4.03427	2	RXN-13603	4.12247	3	PRPPAMIDOTRANS-RXN_f	4.1309	2	RXN-16427	4.14522	2	RXN-19255	4.34643	NIL	RXN-19320	4.10131	3	RXN-21196	3.67241	NIL	RXN-15327	6.159	NIL	RXN-11257	5.27569	NIL	STREPTOMYCIN-3-ADENYLYLTRANSFERASE-RXN
	GAPOXNPHOSPHN-RXN_r	4.06753	1	GAPOXNPHOSPHN-RXN_r	4.06753	1	RXN-19978	6.75239	NIL	RXN-7632	6.04949	1	6PGLUCONDEHYDROG-RXN	5.71553	1	RXN-7892	3.64845	NIL	ALDOSE-1-EPIMERASE-RXN_r	3.59973	5	RXN-19251	4.03473	6	6PGLUCONOLACT-RXN	4.1243	3	PRPPAMIDOTRANS-RXN_r	4.1309	2	1.21.3.1-RXN	4.15207	1	RXN-14227	4.34749	3	RXN-12842	4.10278	5	RXN-8036	3.67267	3	RXN-8204	6.159	2	AKBLIG-RXN_f	5.29502	2	RXN-8087
	1.2.1.45-RXN	4.07365	1	1.2.1.45-RXN	4.07365	1	ANTHRANILOYL-COA-MONOOXYGENASE-RXN	6.77084	1	RXN-13443	6.06023	1	RXN0-2042	5.73484	1	PROTOHEMEFERROCHELAT-RXN_f	3.65117	4	RXN-21378_f	3.59973	NIL	RXN-15276	4.03622	2	RXN-8441	4.12605	3	RXN-11142	4.13311	3	LYSOPHOSPHOLIPASE-RXN	4.15485	3	RIBOSYLHOMOCYSTEINASE-RXN	4.35012	4	RXN-19324	4.10376	3	RXN-16494	3.67504	NIL	2.3.1.130-RXN_f	6.16865	2	AKBLIG-RXN_r	5.29502	2	RXN-18036
	RXN-14367	4.07469	NIL	RXN-14367	4.07469	NIL	RXN0-6511	6.78097	NIL	BILIVERDIN-REDUCTASE-RXN	6.06916	1	RXN-17397_f	5.73999	1	PROTOHEMEFERROCHELAT-RXN_r	3.65117	4	RXN-21378_r	3.59973	NIL	RXN-14282	4.03691	3	RXN-12728	4.12931	NIL	RXN-8799	4.13426	NIL	RXN-8801	4.15705	5	RXN-18045	4.35089	NIL	GTP-CYCLOHYDRO-I-RXN	4.10424	3	RXN-6201	3.67556	4	2.3.1.130-RXN_r	6.16865	2	CHOLINE-O-ACETYLTRANSFERASE-RXN_f	5.29648	2	RXN-15056
	RXN-711	4.07834	NIL	RXN-711	4.07834	NIL	RXN-14829	6.78771	1	RXN66-350_f	6.07428	1	RXN-17397_r	5.73999	1	RXN-16474	3.65211	3	RXN-15709_f	3.59973	5	COBINAMIDEKIN-RXN	4.03726	2	RXN-12266_f	4.13163	NIL	3.4.17.11-RXN	4.13659	3	H2NEOPTERINP3PYROPHOSPHOHYDRO-RXN	4.15741	3	RXN-21110	4.35204	NIL	RXN0-6256	4.10488	NIL	URIDINE-NUCLEOSIDASE-RXN	3.67636	3	RXN-12751	6.17137	2	CHOLINE-O-ACETYLTRANSFERASE-RXN_r	5.29648	2	RXN-10860_f
	AZOBENZENE-REDUCTASE-RXN	4.08104	1	AZOBENZENE-REDUCTASE-RXN	4.08104	1	RXN-13812	6.79702	1	RXN66-350_r	6.07428	1	RXN-7835	5.74339	NIL	RXN-11127	3.65628	NIL	RXN-15709_r	3.59973	5	GANGLIOSIDE-GALACTOSYLTRANSFERASE-RXN	4.03818	2	RXN-12266_r	4.13163	NIL	2.1.1.131-RXN	4.13946	2	RXN-19333	4.15836	NIL	5.4.1.2-RXN_f	4.35332	5	RXN-14436	4.11049	NIL	RXN-15930	3.6771	NIL	RXN-10749	6.17789	2	PHOSACETYLTRANS-RXN_f	5.30005	2	RXN-10860_r
	RXN-11849	4.08993	1	RXN-11849	4.08993	1	RXN-5482	6.81353	NIL	RXN-14484	6.08031	1	RXN-14802	5.76513	NIL	RXN-12675_f	3.65639	5	RXN-19878_f	3.59973	5	RXN-19351	4.04088	2	KDO-8PPHOSPHAT-RXN	4.13375	3	RXN-17737	4.14121	3	RXN-17170	4.16135	NIL	5.4.1.2-RXN_r	4.35332	5	RXN-18017	4.1136	2	RXN-7866	3.68303	1	PROPANOATECOA-LIGASE-RXN_f	6.17949	6	PHOSACETYLTRANS-RXN_r	5.30005	2	NACGLCTRANS-RXN_f
	RXN-13565	4.09069	NIL	RXN-13565	4.09069	NIL	1.1.1.252-RXN_f	6.81416	1	RXN-12994	6.09047	1	RXN66-353_f	5.7654	1	RXN-12675_r	3.65639	5	RXN-19878_r	3.59973	5	RXN-18005	4.04126	NIL	RXN-14327	4.13397	NIL	RXN-10970	4.14168	3	KDO-8PSYNTH-RXN	4.16186	2	RXN0-1862	4.35346	2	1.11.1.12-RXN	4.1146	1	RXN-7855	3.68303	1	PROPANOATECOA-LIGASE-RXN_r	6.17949	6	ASPARTATE-N-ACETYLTRANSFERASE-RXN	5.30051	2	NACGLCTRANS-RXN_r
	RXN0-7020	4.09085	1	RXN0-7020	4.09085	1	1.1.1.252-RXN_r	6.81416	1	1.1.1.210-RXN_f	6.09979	1	RXN66-353_r	5.7654	1	RXN-7895	3.65734	NIL	RXN-18934	3.59973	3	RXN-16567_f	4.04126	4	RXN-12611	4.13609	2	RXN-19014	4.14317	5	RXN-8746	4.16205	3	RXN-20669	4.35366	3	1.20.4.2-RXN	4.11542	1	RXN-9674	3.68455	3	RXN-15363	6.20974	NIL	RXN-9628	5.30778	3	RXN-21073
	RXN-12079_f	4.10259	NIL	RXN-12079_f	4.10259	NIL	RXN-16926	6.82809	NIL	1.1.1.210-RXN_r	6.09979	1	RXN-11194	5.77124	1	RXN-15777	3.65748	NIL	RXN-14362	3.59973	5	RXN-16567_r	4.04126	4	RXN0-5208	4.13631	NIL	RXN-8797	4.14501	NIL	RXN-15820	4.16478	NIL	RXN-13534	4.35502	NIL	RXN-15400_f	4.11625	NIL	RXN-19286	3.68671	1	GLUTARATE--COA-LIGASE-RXN	6.21302	6	PROPANOATECOA-LIGASE-RXN_f	5.31249	6	RXN-9684
	RXN-12079_r	4.10259	NIL	RXN-12079_r	4.10259	NIL	RXN-14245	6.83037	1	RXN-16740	6.10419	NIL	RXN-17386	5.77193	1	RXNQT-4341	3.65753	NIL	RXN-12345	3.59973	4	RXN-13971	4.04323	NIL	PYRIMSYN1-RXN	4.1364	4	RXN-19255	4.14537	NIL	RXN-10895	4.16714	NIL	RXN-18659	4.35716	3	RXN-15400_r	4.11625	NIL	RXN-16902	3.69076	NIL	2.3.1.131-RXN	6.23899	2	PROPANOATECOA-LIGASE-RXN_r	5.31249	6	RXN-6321
	RXN-16950	4.10401	1	RXN-16950	4.10401	1	ACYLGLYCERONE-PHOSPHATE-REDUCTASE-RXN	6.83971	1	RXN-4282	6.1055	1	RXN-14773	5.77227	NIL	RXN-9894	3.66087	NIL	PROSTAGLANDIN-E-SYNTHASE-RXN	3.59973	5	RXN-16510	4.04379	NIL	RXN-13204	4.14129	3	RXN0-7092	4.14756	NIL	GLYOXI-RXN_f	4.16746	4	RXN-14688	4.36349	1	RXN-8666	4.11939	1	RXN-15414	3.69277	1	RXN-8170	6.24591	NIL	RXN-1082	5.31345	2	RXN-20708
	1.1.1.215-RXN	4.10968	1	1.1.1.215-RXN	4.10968	1	R218-RXN	6.87022	NIL	RXN-13468	6.11127	1	RXN-14787	5.77227	NIL	RXN-10087	3.66087	NIL	RXN66-513	3.59973	1	RXN-17388	4.04956	3	RXN0-7001	4.14307	3	RXN-12154	4.14865	NIL	GLYOXI-RXN_r	4.16746	4	RXN-13535	4.36475	NIL	AICARSYN-RXN_f	4.12007	4	RXN-19595	3.69303	3	RXN-13612	6.2516	4	RXN-17960	5.32477	2	RXN-12430
	GALACTITOL-2-DEHYDROGENASE-RXN	4.11068	1	GALACTITOL-2-DEHYDROGENASE-RXN	4.11068	1	RXN-10740	6.87865	NIL	RXN-17409	6.13408	1	RXN-10924	5.77919	NIL	RXN-19798	3.661	NIL	RXN-18191_f	3.59973	NIL	UDP-NACMURALGLDAPLIG-RXN	4.05085	6	RXN0-2381_f	4.14422	4	RXN-14092	4.14975	3	RXNQT-4341	4.17155	NIL	RXN-17166	4.36606	NIL	AICARSYN-RXN_r	4.12007	4	RXN-14247	3.6962	3	RXN-13589	6.29568	2	RXN-17961	5.32477	2	RXN-19043
	L-IDITOL-2-DEHYDROGENASE-RXN_f	4.11068	1	L-IDITOL-2-DEHYDROGENASE-RXN_f	4.11068	1	RXN-9307	6.89972	NIL	RXN-12968	6.13532	1	MORPHINE-6-DEHYDROGENASE-RXN_f	5.7839	1	RXN-12583	3.66277	NIL	RXN-18191_r	3.59973	NIL	RXN-13972	4.0554	NIL	RXN0-2381_r	4.14422	4	RXN-18484	4.15226	3	RXN-13627	4.17787	NIL	RXN-12154	4.36773	NIL	4OHBENZOATE-OCTAPRENYLTRANSFER-RXN	4.12279	2	RXN-9984	3.6962	3	RXN18C3-32	6.29762	NIL	RXN-19375	5.32905	2	2.3.1.72-RXN
	L-IDITOL-2-DEHYDROGENASE-RXN_r	4.11068	1	L-IDITOL-2-DEHYDROGENASE-RXN_r	4.11068	1	RXN-16550	6.92476	1	RXN-16020	6.1507	1	MORPHINE-6-DEHYDROGENASE-RXN_r	5.7839	1	RXN-8450	3.66295	1	RXN-16712_f	3.59973	5	RXN-20784	4.05849	2	RXN-19229	4.14534	2	RXN-8801	4.15724	5	RXN-20921	4.17856	NIL	RXN-14900	4.36865	3	RXN-9850	4.12306	2	RXN-709	3.69758	5	SUCCINATE--COA-LIGASE-GDP-FORMING-RXN_f	6.33144	6	RXN-17962	5.33466	2	RXN-13439
	D-IDITOL-2-DEHYDROGENASE-RXN_f	4.11068	1	D-IDITOL-2-DEHYDROGENASE-RXN_f	4.11068	1	RXN-14767	6.9612	NIL	RXN-16546	6.15129	NIL	TRANSENOYLCOARED-RXN	5.80321	1	RXN-13155	3.66481	NIL	RXN-16712_r	3.59973	5	RXN-4305	4.06566	2	RXN-18484	4.14681	3	RXN-9999_f	4.15795	2	RXN-17701	4.18034	3	RXN-14429	4.36923	3	2.3.1.176-RXN	4.12337	2	SAMDECARB-RXN	3.69786	4	SUCCINATE--COA-LIGASE-GDP-FORMING-RXN_r	6.33144	6	RXN-20227	5.33568	2	RXN-15603
	D-IDITOL-2-DEHYDROGENASE-RXN_r	4.11068	1	D-IDITOL-2-DEHYDROGENASE-RXN_r	4.11068	1	CHOLESTENONE-5-BETA-REDUCTASE-RXN_f	6.96606	1	RXN-9819	6.15837	NIL	RXN-11726	5.80321	1	RXN-19138	3.66707	4	RXN-20094	3.59973	NIL	HISTCYCLOHYD-RXN	4.06882	3	ACYLCARNITINE-HYDROLASE-RXN	4.14747	3	RXN-9999_r	4.15795	2	RXN-13603	4.18274	3	RXN-21214	4.37026	3	RXN-19310	4.12518	3	SULFOCYS-RXN_f	3.6989	2	CITRATE--COA-LIGASE-RXN	6.3353	6	AKPTHIOL-RXN	5.33697	2	2.4.1.153-RXN
	RXN-7644_f	4.11068	1	RXN-7644_f	4.11068	1	CHOLESTENONE-5-BETA-REDUCTASE-RXN_r	6.96606	1	CYCLOHEXADIENYL-DEHYDROGENASE-RXN	6.18107	1	RXN66-482	5.80321	1	4.3.1.4-RXN_f	3.66749	4	D-LYSINE-56-AMINOMUTASE-RXN	3.59973	5	RXN-13745	4.07131	NIL	R342-RXN	4.14913	6	RXN-15654	4.16043	NIL	S-ADENOSYLHOMOCYSTEINE-DEAMINASE-RXN	4.18301	3	RXN-17061	4.3714	NIL	RXN-14951	4.12543	5	SULFOCYS-RXN_r	3.6989	2	MALATE--COA-LIGASE-RXN_f	6.33563	6	NAPHTHOATE-SYN-RXN	5.34506	4	RXN-16569
	RXN-7644_r	4.11068	1	RXN-7644_r	4.11068	1	RXN-16478	6.97357	1	RXN-15464	6.18863	NIL	RXN-7711	5.80321	1	4.3.1.4-RXN_r	3.66749	4	RXNQT-4170	3.59973	4	2.4.1.228-RXN	4.07195	2	RXN-20788	4.14921	3	RXN-12753	4.16044	NIL	RXN0-5214	4.18387	NIL	RXN-12913	4.37199	NIL	RXN-14942_f	4.12543	4	RXN-21192	3.70174	NIL	MALATE--COA-LIGASE-RXN_r	6.33563	6	HOMOSERINE-O-ACETYLTRANSFERASE-RXN_f	5.34815	2	R342-RXN
	MANNITOL-2-DEHYDROGENASE-RXN	4.11068	1	MANNITOL-2-DEHYDROGENASE-RXN	4.11068	1	RXN-14776	6.98931	NIL	RXN-15015	6.19213	NIL	PREPHENATE-DEHYDROGENASE-NADP+-RXN	5.80664	1	RXN-16055	3.66815	4	RXN-18186_f	3.59973	NIL	RXN-12178	4.08046	3	3.1.1.78-RXN	4.15171	3	RXN-12754	4.16044	NIL	5.4.1.2-RXN_f	4.18507	5	RXN-19360	4.37227	2	RXN-14942_r	4.12543	4	RXN-8028	3.70381	5	RXN-15329	6.34553	NIL	HOMOSERINE-O-ACETYLTRANSFERASE-RXN_r	5.34815	2	RXN-15722_f
	RXN-18474	4.11068	1	RXN-18474	4.11068	1	RXN-14790	6.98931	NIL	RXN-17414	6.19294	1	RXN-17387	5.81452	1	RXN-9475	3.66822	4	RXN-18186_r	3.59973	NIL	RXN-16485	4.08046	3	RXN-12753	4.15321	NIL	RXN-20673	4.16267	NIL	5.4.1.2-RXN_r	4.18507	5	RXN-8475	4.3729	2	RXN-20693	4.12667	1	RXN-21374	3.70521	NIL	RXN-13430	6.352	3	HYDROXYMETHYLGLUTARYL-COA-LYASE-RXN	5.35874	4	RXN-15722_r
	RXN-11827_f	4.11068	1	RXN-11827_f	4.11068	1	RXN-9490	6.99491	1	RXN-17412_f	6.19294	1	1.5.1.11-RXN	5.81727	1	RXN-12913	3.66879	NIL	MALEYLPYRUVATE-ISOMERASE-RXN	3.59973	5	RXN18C3-11	4.08263	NIL	RXN-12754	4.15321	NIL	RXN-14980	4.16428	3	3.1.1.47-RXN	4.18594	3	RXN-9488	4.37484	3	RXN-12327	4.13069	5	RXN-19138	3.70573	4	RXN18C3-27	6.36449	NIL	RXN66-475	5.36156	NIL	RXN-13675
	RXN-11827_r	4.11068	1	RXN-11827_r	4.11068	1	RXN-13671_f	7.00995	1	RXN-17412_r	6.19294	1	RXN-14824	5.82518	1	N-ACETYLGLUCOSAMINE-DEACETYLASE-RXN_f	3.66974	3	5.1.3.20-RXN	3.59973	5	2.4.1.92-RXN	4.08313	2	RXN-9051	4.1535	1	RXN-13938_f	4.1753	NIL	RXN-12357	4.1876	3	R345-RXN	4.378	6	OAHTHAUERA-RXN_f	4.13109	3	RXN-13425_f	3.70619	NIL	RXN-16243	6.39888	NIL	RXN-14104	5.36156	NIL	RXN18HP-6
	PCP4MONO-RXN	4.11477	1	PCP4MONO-RXN	4.11477	1	RXN-13671_r	7.00995	1	R546-RXN	6.19833	1	TRANS-2-ENOYL-COA-REDUCTASE-NAD+-RXN	5.83018	1	N-ACETYLGLUCOSAMINE-DEACETYLASE-RXN_r	3.66974	3	MANDELATE-RACEMASE-RXN	3.59973	5	RXN-18563	4.08427	4	RXN-8768	4.154	5	RXN-13938_r	4.1753	NIL	RXN-16709	4.1879	NIL	RXN-8222	4.37882	3	OAHTHAUERA-RXN_r	4.13109	3	RXN-13425_r	3.70619	NIL	RXN-16472_f	6.40401	2	RXN-14105_f	5.36156	NIL	H2-METHYLENE-THMPT-DEHYDRO-RXN_f
	RXN-17359	4.11913	1	RXN-17359	4.11913	1	RXN0-6677	7.02181	NIL	RXN-13363_f	6.20906	NIL	RXN-12558	5.83018	1	RXN-10642	3.67081	4	RXN-20063	3.59973	3	RXN-19696	4.0849	2	RXN-13907	4.15698	1	URPHOS-RXN_f	4.17712	2	RXN-16710	4.1879	NIL	RXN-8474	4.37978	2	RXN-8859	4.13195	NIL	RXN-19798	3.70727	NIL	RXN-16472_r	6.40401	2	RXN-14105_r	5.36156	NIL	H2-METHYLENE-THMPT-DEHYDRO-RXN_r
	RXN-16885	4.11972	NIL	RXN-16885	4.11972	NIL	1.2.1.25-RXN	7.05069	1	RXN-13363_r	6.20906	NIL	RXN-17981	5.84009	1	RXN-9015	3.67261	1	RXN-13142	3.59973	5	RXN-16571	4.08642	NIL	RXN-13938_f	4.15829	NIL	URPHOS-RXN_r	4.17712	2	BTUR2-RXN	4.18841	2	RXN-19298	4.3807	2	2.4.1.92-RXN	4.1333	2	RXN-15722_f	3.70784	NIL	RXN-18387	6.40561	6	RXN66-471	5.36156	NIL	4.1.3.26-RXN
	RXN-13585	4.12279	1	RXN-13585	4.12279	1	RXN-13162	7.10221	2	RXN-10841_f	6.20906	1	RXN-21340	5.85071	1	RXN0-2381_f	3.67955	4	RXN-16300	3.59973	5	RXN-2884	4.08934	NIL	RXN-13938_r	4.15829	NIL	1TRANSKETO-RXN_f	4.17794	2	SINAPINE-ESTERASE-RXN	4.19172	3	SAMDECARB-RXN	4.38208	4	GLUTATHIONE-PEROXIDASE-RXN	4.13373	1	RXN-15722_r	3.70784	NIL	RXN-14268	6.41571	2	CARNITINE-O-PALMITOYLTRANSFERASE-RXN_f	5.37488	2	RXN-13970
	RXN-16061_f	4.13028	1	RXN-16061_f	4.13028	1	INDOLELACTATE-DEHYDROGENASE-RXN	7.11626	1	RXN-10841_r	6.20906	1	RXN-3341	5.85141	1	RXN0-2381_r	3.67955	4	RXN-17771_f	3.59973	5	6.3.2.7-RXN	4.09233	6	RXN-16711	4.15834	4	1TRANSKETO-RXN_r	4.17794	2	RXN-13123	4.19253	3	RXN-16938	4.38282	3	RXN-16249	4.13489	3	RXN-16762	3.70855	NIL	RXN0-5390	6.41682	NIL	CARNITINE-O-PALMITOYLTRANSFERASE-RXN_r	5.37488	2	H2PTEROATESYNTH-RXN
	RXN-16061_r	4.13028	1	RXN-16061_r	4.13028	1	RXN-15728_f	7.13876	1	RXN-17976	6.23288	1	RXN-16885	5.85524	NIL	5.4.4.3-RXN_f	3.67979	5	RXN-17771_r	3.59973	5	RXN-15681	4.0933	NIL	KIEVITONE-HYDRATASE-RXN	4.15993	4	RXN-13203	4.18065	2	3.1.1.78-RXN	4.19552	3	ATP-ADENYLYLTRANSFERASE-RXN_f	4.38431	2	RXN-16086	4.13548	NIL	RXNQT-4341	3.71005	NIL	RXN18C3-44	6.44321	NIL	RXN-683	5.39117	NIL	RXN-15400_f
	1.8.1.5-RXN	4.13671	1	1.8.1.5-RXN	4.13671	1	RXN-15728_r	7.13876	1	1.3.1.49-RXN_f	6.23601	1	MANNPDEHYDROG-RXN_f	5.85775	1	5.4.4.3-RXN_r	3.67979	5	UDPGLCNACEPIM-RXN_f	3.59973	5	RXN-16487	4.09339	NIL	3.4.17.11-RXN	4.16602	3	RXN-8472	4.182	2	ISOMALTULOSE-SYNTHASE-RXN_f	4.1959	5	ATP-ADENYLYLTRANSFERASE-RXN_r	4.38431	2	RXN-10966	4.13549	3	RXN-11543	3.71039	3	SUCCCOASYN-RXN_f	6.4444	6	RXN-20564	5.39163	2	RXN-15400_r
	ALDOSE-6-PHOSPHATE-REDUCTASE-NADPH-RXN_f	4.13747	1	ALDOSE-6-PHOSPHATE-REDUCTASE-NADPH-RXN_f	4.13747	1	RXN-15729_f	7.13876	1	1.3.1.49-RXN_r	6.23601	1	MANNPDEHYDROG-RXN_r	5.85775	1	R365-RXN	3.6806	NIL	UDPGLCNACEPIM-RXN_r	3.59973	5	RXN18C3-13	4.09614	NIL	3.6.1.41-RXN	4.16638	3	RXN-8144	4.18297	4	ISOMALTULOSE-SYNTHASE-RXN_r	4.1959	5	RXN-8666	4.38448	1	1.8.4.7-RXN	4.1398	1	RXN-10100_f	3.71049	5	SUCCCOASYN-RXN_r	6.4444	6	R8-RXN	5.41427	2	RXN-9162
	ALDOSE-6-PHOSPHATE-REDUCTASE-NADPH-RXN_r	4.13747	1	ALDOSE-6-PHOSPHATE-REDUCTASE-NADPH-RXN_r	4.13747	1	RXN-15729_r	7.13876	1	RXN-15607	6.25009	NIL	RXN-15467	5.86037	NIL	RXN-15946	3.68082	4	METHYLMALONYL-COA-EPIM-RXN_f	3.59973	5	PRUNASIN-BETA-GLUCOSIDASE-RXN	4.09746	3	RXN-14688	4.16699	1	RXN-14704	4.18597	3	RXN-8797	4.19726	NIL	RXN-11664	4.38471	3	1.8.4.1-RXN_f	4.1398	1	RXN-10100_r	3.71049	5	RXN-19425_f	6.44642	2	RXN-11258	5.46011	NIL	RXN-18271
	MANNOSE-6-PHOSPHATE-6-REDUCTASE-RXN	4.13747	1	MANNOSE-6-PHOSPHATE-6-REDUCTASE-RXN	4.13747	1	1.5.1.32-RXN	7.14008	1	RXN-17111	6.25015	1	1.5.1.28-RXN_f	5.86579	1	RXN-13908	3.68082	4	METHYLMALONYL-COA-EPIM-RXN_r	3.59973	5	RXN-18274	4.09749	2	RXN-19129	4.16987	1	RXN-14113	4.18764	3	RXN0-5208	4.19771	NIL	RXN-21328	4.3852	NIL	1.8.4.1-RXN_r	4.1398	1	RXN-15946	3.71297	4	RXN-19425_r	6.44642	2	METHYLMALONYL-COA-MUT-RXN_f	5.46213	5	UDPMANACATRANS-RXN
	RXN-18718	4.15259	NIL	RXN-18718	4.15259	NIL	1.1.1.51-RXN	7.16937	1	RXN-13309	6.25015	1	1.5.1.28-RXN_r	5.86579	1	RXN-19731	3.68139	3	3.5.1.81-RXN	3.59973	3	RXN-21323	4.09865	NIL	RXN0-4301	4.17007	5	RXN-19792	4.18777	3	3.6.1.41-RXN	4.2014	3	RXN-8801	4.38703	5	RXN0-963	4.1429	NIL	RXN-17685	3.71358	1	RXN-11257	6.47456	NIL	METHYLMALONYL-COA-MUT-RXN_r	5.46213	5	RXN-19595
	RXN-14986	4.163	1	RXN-14986	4.163	1	RXN-3941	7.18121	NIL	RXN-20343	6.25015	1	RXN-14860	5.87098	NIL	3.5.1.26-RXN	3.68438	3	CELLOBIOSE-EPIMERASE-RXN_f	3.59973	5	RXN-19301	4.10148	2	RXN-18005	4.17177	NIL	RXN-9385	4.19201	NIL	SEDOHEPTULOSE-BISPHOSPHATASE-RXN	4.2017	3	RXN-16344	4.38721	1	2.4.1.86-RXN	4.14334	2	RXN-8151	3.71392	1	RXN-16241	6.48072	NIL	RXN-0	5.47361	2	PYRIMSYN1-RXN
	1.3.1.53-RXN	4.1698	1	1.3.1.53-RXN	4.1698	1	RXN-9484	7.21061	1	RXN-20339	6.25015	1	1.1.1.247-RXN_f	5.87348	1	3.1.4.39-RXN	3.68771	3	CELLOBIOSE-EPIMERASE-RXN_r	3.59973	5	2.3.1.101-RXN_f	4.10205	2	RXN-16567_f	4.17177	4	RXN-9990	4.19246	2	RXN-11459	4.20215	NIL	RXN-18250	4.38779	2	RXN-12751	4.1449	2	RXN66-62	3.71518	NIL	RXN-15045	6.5123	2	RXN-11259	5.48352	NIL	RXN-21244
	RXN-10629	4.1731	1	RXN-10629	4.1731	1	RXN-9483	7.21061	1	ACYL-COA-DEHYDROGENASE-NADP+-RXN	6.25015	1	1.1.1.247-RXN_r	5.87348	1	RXN-17053	3.68942	NIL	RXN-15941_f	3.59973	5	2.3.1.101-RXN_r	4.10205	2	RXN-16567_r	4.17177	4	RXN-13603	4.19528	3	RXN-14615	4.20391	NIL	RXN-8797	4.38941	NIL	RXN-19319	4.14604	3	H2NEOPTERINALDOL-RXN	3.71727	4	RXN-19140	6.56488	NIL	RXN-19744	5.48715	NIL	RXN-14421
	RXN-8772_f	4.17453	1	RXN-8772_f	4.17453	1	RXN-9489	7.2108	1	RXN-20347	6.25015	1	RXN-21346_f	5.87739	1	RXN-14703	3.69245	3	RXN-15941_r	3.59973	5	RXN-14267	4.1071	3	R346-RXN	4.1723	3	RXN-20645	4.19603	2	RXN-8441	4.20582	3	RXN-19875	4.39208	NIL	RXN-12706	4.14883	2	RXN-10857	3.71727	4	RXN-1082	6.56661	2	RXN0-7014	5.49627	2	RXN-16750
	RXN-8772_r	4.17453	1	RXN-8772_r	4.17453	1	RXN-9245	7.21515	1	RXN-9290	6.26248	1	RXN-21346_r	5.87739	1	INDOLE-3-ACETALDEHYDE-OXIDASE-RXN	3.69254	1	RIBULPEPIM-RXN_f	3.59973	5	RXN0-5225	4.11418	3	RXN-10970	4.17253	3	RXN-17514_f	4.19656	4	RXN1G-2	4.20729	3	RXN-17046	4.39377	NIL	RXN6666-2	4.149	3	3.1.3.77-RXN	3.71763	3	RXN18C3-33	6.57885	NIL	RXN-7929_f	5.49711	4	RXN0-262
	RXN-12078_f	4.17453	1	RXN-12078_f	4.17453	1	RXN-16215	7.22748	NIL	RXN-15465	6.27344	NIL	CHOLESTENONE-5-ALPHA-REDUCTASE-RXN	5.89853	1	RXNQT-4366	3.69477	3	RIBULPEPIM-RXN_r	3.59973	5	RXN-15680	4.11484	2	RXN0-262	4.17506	2	RXN-17514_r	4.19656	4	KIEVITONE-HYDRATASE-RXN	4.20754	4	RXN-4441_f	4.39592	2	RXN-14724_f	4.15096	2	RXN-19288	3.7179	1	RXN-18373_f	6.57998	2	RXN-7929_r	5.49711	4	RXN-12718
	RXN-12078_r	4.17453	1	RXN-12078_r	4.17453	1	RXN-19993	7.25031	NIL	RXN-12705	6.28053	1	R203-RXN	5.90229	NIL	RXN-20580	3.6957	1	4-HYDROXYPROLINE-EPIMERASE-RXN_f	3.59973	5	RXN0-7344	4.11526	NIL	RXN0-6254	4.1755	2	RXN-16988	4.19716	NIL	RXN-15930	4.2173	NIL	RXN-4441_r	4.39592	2	RXN-14724_r	4.15096	2	RXN-22	3.71807	4	RXN-18373_r	6.57998	2	RXN-16153	5.51615	2	3.2.1.17-RXN
	RXN-17590	4.17593	1	RXN-17590	4.17593	1	RXN-12673	7.25893	1	RXN-5682	6.28639	1	RXN-12085_f	5.94785	NIL	RXN-19299	3.69798	2	4-HYDROXYPROLINE-EPIMERASE-RXN_r	3.59973	5	RXN-10970	4.11619	3	RXN-14633	4.17604	3	RXN-19166	4.19825	2	RXN-14355	4.22002	NIL	ALPHAALPHA-TREHALOSE-PHOSPHORYLASE-RXN_f	4.39592	2	RXN-8958	4.15431	5	RXN-15603	3.72153	NIL	OXALYL-COA-DECARBOXYLASE-RXN	6.59118	4	RXN-17318	5.51744	2	RXN-14689
	RXN-18713	4.1772	NIL	RXN-18713	4.1772	NIL	RXN-18345	7.27742	1	PCP4MONO-RXN	6.28672	1	RXN-12085_r	5.94785	NIL	RXN-13673	3.69894	2	RXN-9387_f	3.59973	5	RXN-13603	4.11818	3	RXN-18838	4.17629	1	RXN-7984	4.20361	NIL	RXN-21213	4.22029	NIL	ALPHAALPHA-TREHALOSE-PHOSPHORYLASE-RXN_r	4.39592	2	RXN-18060	4.15519	NIL	RXN-13170	3.72362	NIL	RXN0-1382_f	6.59773	2	4.1.2.41-RXN	5.54366	NIL	RXN0-6510_f
	1.14.12.18-RXN	4.18723	1	1.14.12.18-RXN	4.18723	1	RXN-15024	7.30245	NIL	1.5.1.20-RXN_f	6.29238	1	RXN-17395	5.94793	1	RXN-17518	3.69899	4	RXN-9387_r	3.59973	5	RXN-13208	4.12183	NIL	RXN-8073	4.17645	NIL	RXN-13185	4.20437	1	RXN-18509	4.22155	NIL	URPHOS-RXN_f	4.39716	2	RXN-14051_f	4.15545	2	RXN-20979	3.72547	NIL	RXN0-1382_r	6.59773	2	RXN-17315	5.5459	2	RXN0-6510_r
	RXN-16087	4.18854	NIL	RXN-16087	4.18854	NIL	RXN-12939_f	7.30575	1	1.5.1.20-RXN_r	6.29238	1	RXN-18718	5.95146	NIL	RXN-12728	3.70086	NIL	RXN-12336_f	3.59973	5	RXN-10930	4.12246	NIL	RXN0-303_f	4.17874	NIL	KDO-8PSYNTH-RXN	4.20446	2	RXN-12529	4.22432	NIL	URPHOS-RXN_r	4.39716	2	RXN-14051_r	4.15545	2	HISTIDPHOS-RXN	3.72558	3	RXN-17563	6.63983	NIL	RXN-17176	5.5459	2	RXN-11259
	RXN-9353	4.21272	NIL	RXN-9353	4.21272	NIL	RXN-12939_r	7.30575	1	RXN-17386	6.29976	1	1.1.1.285-RXN	5.95868	1	PMPOXI-RXN	3.70173	1	RXN-12336_r	3.59973	5	RXN-5469	4.13011	2	RXN0-303_r	4.17874	NIL	RXN-14355	4.20536	NIL	RXN0-5123	4.22542	NIL	RXN-20582	4.39963	1	RXN-12326	4.15604	5	RXN-21220	3.72683	3	RXN-12547	6.6509	2	RXN-13589	5.55637	2	CHOLESTEROL-OXIDASE-RXN
	RXN-9352	4.21272	NIL	RXN-9352	4.21272	NIL	TESTOSTERONE-17-BETA-DEHYDROGENASE-RXN	7.30826	1	RXN-17524	6.31912	1	RXN-9246	5.97906	1	RXN1F-93	3.70222	1	2.6.1.14-RXN_f	3.59973	2	RXN-19229	4.13097	2	5.4.99.16-RXN_f	4.17904	5	RXN-8255	4.20763	NIL	PYRIMSYN1-RXN	4.22554	4	RXN-8884	4.40107	NIL	RXN-18295	4.15696	2	3.4.22.40-RXN	3.72683	3	RXN18C3-28	6.65586	NIL	OAHTHAUERA-RXN_f	5.55699	3	RXN-14633
	1.1.1.127-RXN_f	4.22602	1	1.1.1.127-RXN_f	4.22602	1	OCTADECANAL-DECARBONYLASE-RXN	7.31187	4	1.14.13.101-RXN	6.32419	1	1.14.12.4-RXN	5.98409	1	RXN-9778_f	3.70753	2	2.6.1.14-RXN_r	3.59973	2	RXN-10606	4.13168	2	5.4.99.16-RXN_r	4.17904	5	HEMN-RXN	4.208	1	RXN-12718	4.22573	3	RXN-5841	4.4019	3	CHOLESTEROL-OXIDASE-RXN	4.15746	1	RXN-21219	3.72683	3	RXN-11258	6.69525	NIL	OAHTHAUERA-RXN_r	5.55699	3	RXN-20168
	1.1.1.127-RXN_r	4.22602	1	1.1.1.127-RXN_r	4.22602	1	RXN-9495	7.31346	NIL	GLUTSEMIALDEHYDROG-RXN	6.32848	1	RXN-16513	5.99004	NIL	RXN-9778_r	3.70753	2	RXN-8950	3.59973	NIL	RXN-18278	4.13311	2	RXN-15366	4.17926	2	RXN-14609	4.20906	NIL	RXN-12252	4.22588	3	RXN-14475	4.40203	3	RXN-14063	4.15861	2	4.2.2.15-RXN	3.72703	4	RXN-11259	6.75347	NIL	2.3.1.42-RXN	5.55723	2	RXN-12694
	RXN-9951_f	4.22657	NIL	RXN-9951_f	4.22657	NIL	OROTATE-REDUCTASE-NADH-RXN	7.32146	1	OMEGA-HYDROXYDECANOATE-DEHYDROGENASE-RXN_f	6.32916	1	RXN-14246_f	6.01447	NIL	RXN-11318	3.70773	3	RXN-10856_f	3.59973	5	RXN0-5124	4.13503	2	H2NEOPTERINALDOL-RXN	4.18263	4	P-PANTOCYSDECARB-RXN	4.21021	4	RXN-12234_f	4.22828	NIL	1TRANSKETO-RXN_f	4.4028	2	RXN-13211	4.15904	NIL	RXN-13210	3.73143	NIL	RXN-13435	6.78693	3	2.8.3.10-RXN_f	5.57588	2	RXN-14837
	RXN-9951_r	4.22657	NIL	RXN-9951_r	4.22657	NIL	1.2.1.27-RXN	7.32973	1	OMEGA-HYDROXYDECANOATE-DEHYDROGENASE-RXN_r	6.32916	1	RXN-14246_r	6.01447	NIL	RXN-10105_f	3.71053	5	RXN-10856_r	3.59973	5	RXN-11502	4.13746	NIL	RXN-10857	4.18263	4	RXN-13165	4.21115	1	RXN-12234_r	4.22828	NIL	1TRANSKETO-RXN_r	4.4028	2	RXN-12846	4.15961	5	RXN-14206	3.734	4	RXN-19490_f	6.79897	2	2.8.3.10-RXN_r	5.57588	2	RXN-17334
	1.3.1.29-RXN	4.23855	1	1.3.1.29-RXN	4.23855	1	RXN-11213	7.32973	1	RXN-15601	6.3478	NIL	RXN-9480_f	6.01743	1	RXN-10105_r	3.71053	5	RXN-15598	3.59973	7	RXN-9485	4.13811	4	RXN-13609_f	4.18322	4	URA-PHOSPH-RXN_f	4.21356	2	RXN-12266_f	4.22871	NIL	PANTEPADENYLYLTRAN-RXN	4.40281	2	RXN-19361	4.16167	2	RXN-19289	3.73445	1	RXN-19490_r	6.79897	2	MALONYL-COA-DECARBOXYLASE-RXN	5.58676	4	RXN-774
	RXN-16801	4.24139	1	RXN-16801	4.24139	1	RXN-15079	7.36086	NIL	RXN-2221	6.34953	1	RXN-9480_r	6.01743	1	RXN-14458	3.71151	2	RXN-14365_f	3.59973	5	RXN-19174	4.13979	NIL	RXN-13609_r	4.18322	4	URA-PHOSPH-RXN_r	4.21356	2	RXN-12266_r	4.22871	NIL	RXN-20784	4.40411	2	RXN-14338	4.16411	2	RXN-13839	3.73488	NIL	RXN-18567	6.80942	2	RXN-15013_f	5.59347	NIL	6.3.2.7-RXN
	RXN-16949	4.24226	1	RXN-16949	4.24226	1	1.5.1.27-RXN_f	7.36794	1	RXN-10625	6.35677	1	RXN-8825	6.0201	1	RXN-4305	3.71338	2	RXN-14365_r	3.59973	5	RXN18HP-7	4.13979	NIL	RXN-13532	4.18392	NIL	RXN18C3-16	4.2144	NIL	SULFATE-ADENYLYLTRANSFERASE-ADP-RXN	4.22909	2	RXN-2223	4.40659	NIL	RXN-13729	4.16458	4	RXN-19290	3.73665	1	MALONYL-COA-DECARBOXYLASE-RXN	6.82698	4	RXN-15013_r	5.59347	NIL	RXN-21214
	1.1.1.43-RXN	4.24257	1	1.1.1.43-RXN	4.24257	1	1.5.1.27-RXN_r	7.36794	1	6PGLUCONDEHYDROG-RXN	6.36817	1	RXN-14798	6.02031	NIL	RXN-18563	3.71488	4	AMINOACYLASE-RXN	3.59973	3	RXN-15795	4.14175	NIL	RXN-12234_f	4.18404	NIL	RXN-12583	4.21468	NIL	RXN-12059	4.23413	3	GTP-CYCLOHYDRO-I-RXN	4.40853	3	RXN-12694	4.16648	5	RXN-11542	3.73693	1	HYDROXYMETHYLGLUTARYL-COA-LYASE-RXN	6.83174	4	ACETOACETYL-COA-TRANSFER-RXN_f	5.60696	2	RXN-18044
	RXN-17342_f	4.24367	1	RXN-17342_f	4.24367	1	1.1.1.149-RXN_f	7.37896	1	RXN-20439	6.39325	1	1.3.1.62-RXN	6.05844	1	RXN-19769	3.71557	3	PROLINE-RACEMASE-RXN_f	3.59973	5	RXN-19014	4.14228	5	RXN-12234_r	4.18404	NIL	RXN-18273	4.21719	NIL	RXN0-963	4.23528	NIL	H2NEOPTERINP3PYROPHOSPHOHYDRO-RXN	4.40903	3	2.4.1.79-RXN	4.1673	2	RXN1G-2	3.73927	3	RXN-9628	6.8349	3	ACETOACETYL-COA-TRANSFER-RXN_r	5.60696	2	RXN-21094
	RXN-17342_r	4.24367	1	RXN-17342_r	4.24367	1	1.1.1.149-RXN_r	7.37896	1	RXN-16884	6.40765	NIL	RXN-12886	6.06261	1	RXN-14333	3.71667	1	PROLINE-RACEMASE-RXN_r	3.59973	5	RXN-13534	4.14592	NIL	RXN-16093	4.18465	NIL	ACYLCARNITINE-HYDROLASE-RXN	4.21754	3	RXN-16938	4.23535	3	RXN-13627	4.40908	NIL	RXN-14407	4.16773	1	RXN-12357	3.73981	3	RXN-20227	6.85341	2	RXN-19536	5.60721	2	UDP-NACMURALGLDAPLIG-RXN
	DCDPC-RXN	4.2476	1	DCDPC-RXN	4.2476	1	RXN-11977	7.38773	NIL	RXN-20193	6.41239	1	RXN-8820	6.06287	1	RXN-8038	3.71814	5	PROSTAGLANDIN-I-SYNTHASE-RXN	3.59973	5	RXN-13210	4.14633	NIL	RXN-10620	4.19062	1	RXN-13648	4.22226	2	2.5.1.42-RXN	4.23887	2	2.4.1.230-RXN_f	4.4096	2	RXN-8472	4.17079	2	RXN-9034_f	3.74057	NIL	RXN-19799	6.85859	NIL	RXN-19191	5.61191	NIL	RXN-15089
	RXN-15049	4.25383	NIL	RXN-15049	4.25383	NIL	PYRUVATE-DEHYDROGENASE-NADP+-RXN_f	7.38795	1	RXN66-353_f	6.44408	1	RXN-16797	6.06287	1	RXN-12529	3.72059	NIL	RXN-11884_f	3.59973	5	RXN-12529	4.14635	NIL	RXN-9584	4.19105	NIL	3.2.1.156-RXN	4.22232	3	RXN-17741	4.2409	3	2.4.1.230-RXN_r	4.4096	2	RXN-15028	4.17237	NIL	RXN-9034_r	3.74057	NIL	R8-RXN	6.86374	2	R268-RXN	5.61387	NIL	RXN-15749
	RXN-15051_f	4.254	1	RXN-15051_f	4.254	1	PYRUVATE-DEHYDROGENASE-NADP+-RXN_r	7.38795	1	RXN66-353_r	6.44408	1	RXN0-6565_f	6.06327	1	RXN-18932_f	3.72115	1	RXN-11884_r	3.59973	5	RXN-16344	4.1482	1	RXN-19339	4.1912	2	RXN-8081	4.22335	6	RXN-13908	4.2486	4	RXN-17501_f	4.4096	2	1.13.11.25-RXN	4.1727	1	RXN-18548	3.74126	3	CARNITINE-O-PALMITOYLTRANSFERASE-RXN_f	6.87256	2	RXN-9918	5.63024	2	RXN-18307
	RXN-15051_r	4.254	1	RXN-15051_r	4.254	1	RXN-12736_f	7.39573	1	RXN-13344	6.44663	1	RXN0-6565_r	6.06327	1	RXN-18932_r	3.72115	1	RXN-18194_f	3.59973	NIL	RXN-11183	4.14905	3	RXN-17166	4.19381	NIL	RXN-20710	4.2256	6	RXN-18004	4.25011	NIL	RXN-17501_r	4.4096	2	RXN-18222_f	4.17401	3	3.1.4.2-RXN	3.74254	3	CARNITINE-O-PALMITOYLTRANSFERASE-RXN_r	6.87256	2	RXN-18370_f	5.63024	2	OAHTHAUERA-RXN_f
	1.14.12.15-RXN	4.26258	1	1.14.12.15-RXN	4.26258	1	RXN-12736_r	7.39573	1	RXN-15466	6.44996	NIL	RXN-16796	6.06875	1	X-METHYL-HIS-DIPEPTIDASE-RXN	3.72125	3	RXN-18194_r	3.59973	NIL	RXN-15498	4.15046	NIL	RXN-14615	4.19663	NIL	RXN-13852	4.22777	1	RXN-15233_f	4.25011	NIL	RXN-18251	4.41101	2	RXN-18222_r	4.17401	3	RXN-19974	3.74544	NIL	GLUTACONATE-COA-TRANSFERASE-RXN_f	6.89334	2	RXN-18370_r	5.63024	2	OAHTHAUERA-RXN_r
	D-THREO-ALDOSE-1-DEHYDROGENASE-RXN_f	4.26343	1	D-THREO-ALDOSE-1-DEHYDROGENASE-RXN_f	4.26343	1	RXN-7790	7.40071	1	RXN-9848	6.46492	NIL	MYO-INOSITOL-2-DEHYDROGENASE-RXN_f	6.07846	1	RXN0-7141	3.72614	NIL	RXN-16161_f	3.59973	NIL	5.4.1.2-RXN_f	4.15505	5	RXN-13534	4.19813	NIL	RXN-18414	4.22975	NIL	RXN-15233_r	4.25011	NIL	RXN-11192	4.41137	3	RXN-20664	4.1754	NIL	RXN-13157	3.74609	NIL	GLUTACONATE-COA-TRANSFERASE-RXN_r	6.89334	2	RXN-20370	5.65298	NIL	RXN-12529
	D-THREO-ALDOSE-1-DEHYDROGENASE-RXN_r	4.26343	1	D-THREO-ALDOSE-1-DEHYDROGENASE-RXN_r	4.26343	1	RXN-8683	7.41487	1	1.3.1.60-RXN_f	6.46555	1	MYO-INOSITOL-2-DEHYDROGENASE-RXN_r	6.07846	1	RXN-12070	3.72645	3	RXN-16161_r	3.59973	NIL	5.4.1.2-RXN_r	4.15505	5	FRUCTOSE-6-PHOSPHATE-PHOSPHOKETOLASE-RXN	4.19854	4	RXN-17683	4.23097	NIL	RXN-12611	4.2506	2	RXN-19014	4.41338	5	RXN-18840	4.17592	3	RXN-19271	3.74661	NIL	RXN-20145	6.90149	NIL	RXN-20368	5.65298	2	COBINPGUANYLYLTRANS-RXN
	1.14.13.63-RXN	4.26865	1	1.14.13.63-RXN	4.26865	1	RXN-8678	7.41487	1	1.3.1.60-RXN_r	6.46555	1	RXN-20994	6.12568	1	RXN-9476	3.72734	4	LEUKOTRIENE-A4-HYDROLASE-RXN	3.59973	3	RXN-13597	4.15534	2	AIRCARBOXY-RXN_f	4.1995	4	RXN-7985	4.23176	NIL	RXN-19572	4.25181	3	RXN-14282	4.41367	3	RXN0-6510_f	4.17676	5	4-ACETAMIDOBUTYRYL-COA-DEACETYLASE-RXN	3.74693	3	RXN-15044	6.90187	2	RXN-20369	5.65298	2	RXN-12845
	RXN-13749	4.27719	1	RXN-13749	4.27719	1	1.5.1.19-RXN	7.41833	1	RXN-20709	6.47144	1	1.1.1.201-RXN_f	6.12951	1	RXN-19583	3.72738	4	RXN-20579	3.59973	1	RXN0-5120	4.15855	NIL	AIRCARBOXY-RXN_r	4.1995	4	RXN-15330	4.2336	NIL	RXN-10003	4.25298	2	RXN-8883	4.41537	NIL	RXN0-6510_r	4.17676	5	RXN-7461	3.75056	2	ACETOACETYL-COA-TRANSFER-RXN_f	6.90331	2	RXN-13029	5.66076	4	RXN-902
	1.5.1.15-RXN	4.28003	1	1.5.1.15-RXN	4.28003	1	RXN66-343	7.42194	1	FLAVONADPREDUCT-RXN_f	6.49146	1	1.1.1.201-RXN_r	6.12951	1	RXN-17046	3.72807	NIL	RXN-11402_f	3.59973	NIL	RXN-19173	4.16539	NIL	R345-RXN	4.20009	6	RXN-19700	4.23515	2	RXN-17083	4.25298	NIL	RXN-7759	4.41538	2	RXN-12329	4.17718	5	RXN-19281	3.75433	5	ACETOACETYL-COA-TRANSFER-RXN_r	6.90331	2	PYRUVFORMLY-RXN_f	5.66501	2	RXN-14640
	RXN-9794	4.2838	1	RXN-9794	4.2838	1	RXN-21337_f	7.42491	NIL	FLAVONADPREDUCT-RXN_r	6.49146	1	RXN-17980	6.13559	1	RXNN-404	3.7281	3	RXN-11402_r	3.59973	NIL	RXN-13535	4.16592	NIL	RXN-13535	4.20401	NIL	RXN-18069_f	4.23968	NIL	HEMEOSYN-RXN	4.25426	2	RXN-19359	4.41716	2	RXN-11133	4.17867	3	RXN-19273	3.75433	5	RXN-7929_f	6.95854	4	PYRUVFORMLY-RXN_r	5.66501	2	RXN-17842
	RXN-9840	4.2838	1	RXN-9840	4.2838	1	RXN-21337_r	7.42491	NIL	RXN-12444	6.49146	1	RXN3O-1070_f	6.14428	1	RXN-13558	3.72881	3	RXN-14360	3.59973	NIL	TROPINESTERASE-RXN	4.16849	3	UDPACYLGLCNACDEACETYL-RXN	4.20428	3	RXN-18069_r	4.23968	NIL	RXN-10896	4.25466	NIL	RXN-17045	4.4176	NIL	RXN-21033	4.18039	NIL	PABASYN-RXN_f	3.75662	2	RXN-7929_r	6.95854	4	RXN-17326	5.67282	2	RXN-4305
	RXN0-6367	4.28493	1	RXN0-6367	4.28493	1	RXN-11472_f	7.43004	1	RXN-17395	6.50044	1	RXN3O-1070_r	6.14428	1	RXN-15547	3.72976	NIL	RXN-14463	3.59973	NIL	RXN-19175	4.16889	NIL	RXN-13729	4.20794	4	RXNQT-4191	4.24433	3	RXN-8768	4.25757	5	RXN-17435	4.41922	4	RXN-19755	4.18053	NIL	PABASYN-RXN_r	3.75662	2	2.3.1.42-RXN	6.97392	2	PYFLAVOXRE-RXN_f	5.68157	1	RXN-10846
	RXN-14668	4.29973	NIL	RXN-14668	4.29973	NIL	RXN-11472_r	7.43004	1	NAPHTHALENE-12-DIOXYGENASE-RXN	6.50194	1	RXN-9952	6.14781	1	UROGENIIISYN-RXN	3.73089	4	RXN-14815_f	3.59973	NIL	RXN-19176	4.16889	NIL	RXN-21034	4.20982	NIL	RXN-12236	4.24522	NIL	RXN-7947	4.2601	5	RXN-21213	4.42116	NIL	RXN-8471	4.18201	2	3-OXOADIPATE-ENOL-LACTONASE-RXN	3.75718	3	RXN-8889	6.98685	NIL	PYFLAVOXRE-RXN_r	5.68157	1	RXN0-1461
	RXN-11679	4.30138	NIL	RXN-11679	4.30138	NIL	RXN-11471_f	7.43004	1	RXN-13478	6.5099	1	RXN-708	6.15914	NIL	IPPISOM-RXN_f	3.7316	5	RXN-14815_r	3.59973	NIL	RXN-14563	4.16893	2	RXN-12252	4.21128	3	RXN-13166	4.24597	NIL	RXN-8810	4.2618	2	RXN-19766	4.42678	3	RXN-12611	4.19009	2	RXN-12632	3.75798	4	2.8.3.10-RXN_f	6.98851	2	RXN-20399	5.68278	2	RXN-15739
	RXN-12661	4.31136	1	RXN-12661	4.31136	1	RXN-11471_r	7.43004	1	R201-RXN	6.5146	NIL	RXN-18463	6.1597	NIL	IPPISOM-RXN_r	3.7316	5	RXNQT-4173	3.59973	4	RXN-19188	4.16898	NIL	5.4.1.2-RXN_f	4.21159	5	RXNQT-4341	4.24929	NIL	RXN-20580	4.2619	1	RXN0-5395	4.42678	NIL	RXN-1321	4.19082	1	RXN-21178	3.75806	NIL	2.8.3.10-RXN_r	6.98851	2	RXN-8889	5.68624	NIL	RXN-21110
	RXN-15114	4.3127	NIL	RXN-15114	4.3127	NIL	RXN-8957	7.43162	1	RXN-3341	6.51488	1	RXN-12450_f	6.1599	1	RXN-12632	3.73283	4	GLUCUROISOM-RXN_f	3.59973	5	GTP-CYCLOHYDRO-I-RXN	4.17022	3	5.4.1.2-RXN_r	4.21159	5	RXN-10053	4.25117	2	RXN-18838	4.26193	1	RXN-18261	4.43007	2	RXN-18068	4.19151	NIL	RXN-12070	3.75807	3	RXN-20564	7.01402	2	GLUTACONATE-COA-TRANSFERASE-RXN_f	5.6893	2	RXN0-1862
	RXN-16826	4.31317	NIL	RXN-16826	4.31317	NIL	RXN-9718	7.44054	2	RXN-13402	6.52322	1	RXN-12450_r	6.1599	1	RXN-709	3.73375	5	GLUCUROISOM-RXN_r	3.59973	5	RXN-15326	4.17051	2	3.1.4.38-RXN	4.2117	3	RXN-9051	4.25238	1	RXN-13212_f	4.26233	NIL	RXN-8220	4.43056	3	RXN-14560	4.19551	2	RXN-16526	3.76003	NIL	RXN-19744	7.03821	NIL	GLUTACONATE-COA-TRANSFERASE-RXN_r	5.6893	2	RXN-10902
	RXN-17808	4.3146	1	RXN-17808	4.3146	1	PYRUVDEH-RXN	7.44784	NIL	RXN-13342	6.54071	1	8-OXOCOFORMYCIN-REDUCTASE-RXN	6.16311	1	RXN-9869	3.73379	NIL	RXN-18189_f	3.59973	NIL	RXN-13974	4.17051	2	SEDOHEPTULOSE-BISPHOSPHATASE-RXN	4.21286	3	RXN-18420	4.25352	NIL	RXN-13212_r	4.26233	NIL	RXN-20581	4.43174	1	RXN-13677	4.19648	3	RXN-14327	3.76178	NIL	RXN-20360	7.04194	2	RXN-17316	5.71331	2	RXN-10903
	1.1.1.251-RXN_f	4.3228	1	1.1.1.251-RXN_f	4.3228	1	RXN-16216	7.4483	NIL	RXN-9799	6.54349	NIL	RXN0-6444	6.20411	1	MUCONOLACTONE-DELTA-ISOMERASE-RXN	3.73399	5	RXN-18189_r	3.59973	NIL	RXN-10609	4.17198	2	RXN-20669	4.21505	3	RXN-17078	4.25434	NIL	RXN-19294_f	4.26427	5	RXN-14704	4.43447	3	RXN3DJ-11230	4.19696	NIL	RXN-8040	3.76217	5	3.4.17.13-RXN	7.04476	3	RXN-12363	5.72516	2	RXN-17714_f
	1.1.1.251-RXN_r	4.3228	1	1.1.1.251-RXN_r	4.3228	1	1.2.1.18-RXN_f	7.46364	NIL	RXN-17341_f	6.54945	1	RXN-13385	6.21032	NIL	RXN-18721	3.73718	NIL	5.1.3.9-RXN_f	3.59973	5	RXN-18270	4.17225	2	RXN-12744	4.21602	NIL	RXN-12238	4.25434	2	RXN-19294_r	4.26427	5	3.2.1.18-RXN	4.43503	3	HYDROXYMETHYLGLUTARYL-COA-LYASE-RXN	4.19894	4	RXN-13609_f	3.76296	4	RXN-20664	7.0482	NIL	OXALYL-COA-DECARBOXYLASE-RXN	5.72619	4	RXN-17714_r
	SORB6PDEHYDROG-RXN_f	4.3228	1	SORB6PDEHYDROG-RXN_f	4.3228	1	1.2.1.18-RXN_r	7.46364	NIL	RXN-17341_r	6.54945	1	RXN-15365	6.22228	NIL	1.13.11.41-RXN	3.73925	1	5.1.3.9-RXN_r	3.59973	5	RXN-15789	4.17451	NIL	RXN-12115	4.21729	1	RXN-10002	4.25434	2	RXN-12744	4.26768	NIL	2.4.1.149-RXN	4.4363	2	RXN-18067	4.2009	NIL	RXN-13609_r	3.76296	4	RXN-14051_f	7.062	2	RXN-9666	5.73566	3	RXN-21004
	SORB6PDEHYDROG-RXN_r	4.3228	1	SORB6PDEHYDROG-RXN_r	4.3228	1	RXN-15026	7.46833	NIL	PREPHENATEDEHYDROG-RXN	6.55995	1	RXN-16580	6.22291	NIL	RXN-16322	3.73989	1	UDP-ARABINOSE-4-EPIMERASE-RXN_f	3.59973	5	RXN-4313	4.17807	NIL	RXN-14370	4.21828	3	RXN0-5398_f	4.2588	4	5.4.99.16-RXN_f	4.2688	5	RXN-18563	4.43725	4	RXN18C3-16	4.2026	NIL	RXN-8743	3.76591	3	RXN-14051_r	7.062	2	RXNQT-4169	5.73606	2	RXN-12753
	RXN-16060_f	4.32763	1	RXN-16060_f	4.32763	1	RXN-8684	7.4777	1	MANNPDEHYDROG-RXN_f	6.57257	1	RXN-11566	6.23416	1	GALPMUT-RXN_f	3.74258	5	UDP-ARABINOSE-4-EPIMERASE-RXN_r	3.59973	5	RXN-8287	4.17829	NIL	RXN-8953_f	4.22198	2	RXN0-5398_r	4.2588	4	5.4.99.16-RXN_r	4.2688	5	RXN-21171	4.43893	NIL	RXN-18278	4.20284	2	1.13.11.16-RXN	3.76654	1	NAPHTHOATE-SYN-RXN	7.08196	4	RXN-14462	5.73606	NIL	RXN-12754
	RXN-16060_r	4.32763	1	RXN-16060_r	4.32763	1	RXN-8679	7.4777	1	MANNPDEHYDROG-RXN_r	6.57257	1	RXN-16799	6.23637	1	GALPMUT-RXN_r	3.74258	5	RXN-14150_f	3.59973	5	RXN-18263	4.1786	2	RXN-8953_r	4.22198	2	RXN-13695	4.26134	3	RXN-10053	4.26887	2	RXN-20419	4.44041	NIL	2.8.3.13-RXN_f	4.2029	2	RXN-18090	3.76726	NIL	RXN-17318	7.08231	2	RXNQT-4172	5.73606	2	RXN-19300
	RXN-9159	4.3308	1	RXN-9159	4.3308	1	RXN-9958	7.49031	1	RXN-10845	6.58317	1	RXN-9874	6.24075	NIL	SUCCARGDIHYDRO-RXN	3.74283	3	RXN-14150_r	3.59973	5	DOLICHYL-PHOSPHATASE-RXN	4.17952	3	RXN-11716	4.22393	NIL	RXN-19572	4.26167	3	RXN0-7002	4.27154	3	RXN-15654	4.44212	NIL	2.8.3.13-RXN_r	4.2029	2	RXN-15682	3.76729	3	RXN-9760	7.09365	NIL	RXNQT-4175	5.73606	2	TRANS-PENTAPRENYLTRANSFERASE-RXN
	RXN-9158	4.3308	1	RXN-9158	4.3308	1	ACETALD-DEHYDROG-RXN_f	7.52439	1	MORPHINE-6-DEHYDROGENASE-RXN_f	6.61722	1	RXN-18713	6.24975	NIL	4.2.2.15-RXN	3.74325	4	H2NTPEPIM-RXN_f	3.59973	5	RXN-19695	4.18	2	RXN-18659	4.23043	3	RIBOSYLHOMOCYSTEINASE-RXN	4.26238	4	RXN-19792	4.27243	3	RXN-17532	4.44408	NIL	RXN-11142	4.20384	3	RXN-21242	3.76766	NIL	RXN-9918	7.0966	2	RXN-18197_f	5.73606	2	RXN-20785
	RXN-14819	4.33416	1	RXN-14819	4.33416	1	ACETALD-DEHYDROG-RXN_r	7.52439	1	MORPHINE-6-DEHYDROGENASE-RXN_r	6.61722	1	RXN-16924	6.25105	NIL	RXN-14670	3.74371	1	H2NTPEPIM-RXN_r	3.59973	5	UDPACYLGLCNACDEACETYL-RXN	4.18291	3	RXN-17741	4.23068	3	RIBOFLAVINASE-RXN_f	4.26284	3	RXN-13643	4.27421	1	RXN-8277	4.44456	NIL	RXN-16456	4.20392	2	RXN-12963	3.77015	1	RXN-18370_f	7.0966	2	RXN-18197_r	5.73606	2	RXN-19756
	RXN-16254	4.33841	NIL	RXN-16254	4.33841	NIL	N-ACETYLGLUTPREDUCT-RXN_f	7.52525	1	2-HYDROXYBIPHENYL-3-MONOOXYGENASE-RXN	6.61771	1	RXN-13476	6.2578	1	2.3.1.103-RXN	3.7443	2	RXN-7772	3.59973	NIL	RXN-15333	4.1858	NIL	5.3.1.23-RXN_f	4.23072	5	RIBOFLAVINASE-RXN_r	4.26284	3	RXN-15980	4.27514	NIL	RXN-8281	4.44456	NIL	RXN-21295	4.20392	2	RXN-4509	3.77056	2	RXN-18370_r	7.0966	2	RXNQT-4166	5.73606	2	RXN-13274
	RXN-11209_f	4.34029	1	RXN-11209_f	4.34029	1	N-ACETYLGLUTPREDUCT-RXN_r	7.52525	1	RXN-9510	6.62405	1	RXN-9873	6.26212	NIL	L-PIPECOLATE-OXIDASE-RXN	3.74433	1	ALARACECAT-RXN_f	3.59973	5	RXN-18264	4.18859	2	5.3.1.23-RXN_r	4.23072	5	RXN-18066	4.26516	NIL	RXN-12265	4.27594	3	RXN-8292_f	4.44456	NIL	RXN-9852	4.20634	2	R103-RXN	3.77129	4	RXN-17315	7.10788	2	RXN-13392	5.74826	NIL	RXN-14338
	RXN-11209_r	4.34029	1	RXN-11209_r	4.34029	1	RXN-2902	7.52784	1	FMNREDUCT-RXN	6.62621	1	RXN-17339	6.2713	1	RXN-15295	3.74499	1	ALARACECAT-RXN_r	3.59973	5	RXN-17286	4.18926	NIL	RXN-14876_f	4.23584	5	RXN-13908	4.26629	4	RXN-15703	4.27652	3	RXN-8292_r	4.44456	NIL	RXN-21376	4.20634	2	RXN1F-147	3.77204	5	RXN-17176	7.10788	2	RXN0-1382_f	5.75226	2	RXN-21215
	RXN8J2-136	4.34074	1	RXN8J2-136	4.34074	1	RXN-17396_f	7.54001	1	PREPHENATE-DEHYDROGENASE-NADP+-RXN	6.64498	1	RXN-4210	6.27351	1	APIGNAR-RXN	3.74788	5	RXN-13776_f	3.59973	5	RXN-14617	4.19008	3	RXN-14876_r	4.23584	5	RXN-20669	4.26702	3	CHORISMATE-SYNTHASE-RXN	4.27809	4	RXN-19313	4.44727	3	RXN-13971	4.21036	NIL	TRYPSYN-RXN	3.77446	4	4.1.2.41-RXN	7.1228	NIL	RXN0-1382_r	5.75226	2	RXN-19587
	HCAMULTI-RXN	4.3435	1	HCAMULTI-RXN	4.3435	1	RXN-17396_r	7.54001	1	RXN-15467	6.64564	NIL	RXN-13069	6.30517	1	RXN-18223	3.75142	NIL	RXN-13776_r	3.59973	5	RXN-14688	4.19123	1	RXN-13908	4.23754	4	SAMDECARB-RXN	4.26827	4	RXN-17334	4.28542	NIL	SEDOHEPTULOSE-BISPHOSPHATASE-RXN	4.4485	3	RXN-16472_f	4.21113	2	2.5.1.19-RXN_f	3.77515	2	RXN-20399	7.13179	2	RXN-20366	5.75423	NIL	RXN-18563
	RXN-11394	4.34554	NIL	RXN-11394	4.34554	NIL	CHLORDECONE-REDUCTASE-RXN_f	7.5459	1	RXN-11194	6.65125	1	1.1.1.222-RXN	6.32352	1	1.1.3.38-RXN	3.75176	1	RXN-12928	3.59973	NIL	RXN0-5125	4.19438	2	RXN-16709	4.23947	NIL	CYCLOEUCALENOL-CYCLOISOMERASE-RXN	4.26996	5	RXN-14605	4.29085	3	RXN-13799	4.44902	NIL	RXN-16472_r	4.21113	2	2.5.1.19-RXN_r	3.77515	2	RXN66-475	7.14444	NIL	RXN-11054	5.75993	4	RXN-21005
	RXN-18712	4.34675	NIL	RXN-18712	4.34675	NIL	CHLORDECONE-REDUCTASE-RXN_r	7.5459	1	1.1.1.247-RXN_f	6.66502	1	RXN-11934	6.32641	NIL	RXN3O-4157_f	3.75756	2	GALACTURIDYLYLTRANS-RXN_f	3.59973	2	RXN1F-474	4.19471	NIL	RXN-16710	4.23947	NIL	RXN-13729	4.27213	4	RXN-14688	4.29146	1	R342-RXN	4.44938	6	RXN-864_f	4.21272	2	R607-RXN	3.77523	NIL	RXN-14104	7.14444	NIL	RXN-9646	5.76401	NIL	RXN-14605
	RXN-10091	4.35007	1	RXN-10091	4.35007	1	OROTATE-REDUCTASE-NADPH-RXN_f	7.57948	1	1.1.1.247-RXN_r	6.66502	1	11-BETA-HYDROXYSTEROID-DEHYDROGENASE-RXN_f	6.33355	1	RXN3O-4157_r	3.75756	2	GALACTURIDYLYLTRANS-RXN_r	3.59973	2	RXN-17406	4.1949	2	RXN-17095	4.2399	3	RXN-18247	4.27326	2	RXN-8450	4.29325	1	RXN-13691	4.44959	3	RXN-864_r	4.21272	2	RXN-19821	3.78387	4	RXN-14105_f	7.14444	NIL	RXN-14266	5.77335	4	RXN-19306
	RXN-663	4.35106	1	RXN-663	4.35106	1	OROTATE-REDUCTASE-NADPH-RXN_r	7.57948	1	PHENYLALANINE-DEHYDROGENASE-RXN	6.6733	1	11-BETA-HYDROXYSTEROID-DEHYDROGENASE-RXN_r	6.33355	1	RXN-19276	3.75769	NIL	RXN-10956_f	3.59973	NIL	2.4.1.151-RXN	4.19574	2	RXN-16938	4.24431	3	RXN-19188	4.27531	NIL	RXN-8953_f	4.29774	2	RXN-13692	4.44959	3	RXN0-4181	4.213	3	RXN-16055	3.78392	4	RXN-14105_r	7.14444	NIL	ARALKYLAMINE-N-ACETYLTRANSFERASE-RXN_f	5.79247	2	RXN-16966
	RXN-18654	4.35461	1	RXN-18654	4.35461	1	1.1.1.210-RXN_f	7.59169	1	RXN-21224	6.67819	1	CORTISONE-ALPHA-REDUCTASE-RXN	6.33495	1	RXN-11730	3.75863	3	RXN-10956_r	3.59973	NIL	RXN-12039	4.19589	NIL	RXN-7866	4.24686	1	RXN-8731	4.27717	3	RXN-8953_r	4.29774	2	RXN-13701	4.44959	3	RXN-12024	4.21349	3	RXN-20673	3.78598	NIL	RXN66-471	7.14444	NIL	ARALKYLAMINE-N-ACETYLTRANSFERASE-RXN_r	5.79247	2	CYPRIDINA-LUCIFERIN-2-MONOOXYGENASE-RXN
	RXN1UA-51	4.35461	1	RXN1UA-51	4.35461	1	1.1.1.210-RXN_r	7.59169	1	1.5.1.11-RXN	6.68143	1	CORTISONE-BETA-REDUCTASE-RXN_f	6.33495	1	LACTOYL-COA-DEHYDRATASE-RXN	3.75957	4	RXN-15710_f	3.59973	5	2.1.1.131-RXN	4.19748	2	RXN-7855	4.24686	1	RXN-17401	4.28029	4	RXN-12330	4.29898	5	1.8.1.15-RXN	4.44997	1	RXN-5472	4.21627	2	RXN-8942	3.78618	NIL	RXN-19798	7.15633	NIL	4.1.3.26-RXN	5.79447	4	RXN-11290
	RXN-18612	4.35461	1	RXN-18612	4.35461	1	RXN-9065	7.60725	NIL	RXN-14824	6.68551	1	CORTISONE-BETA-REDUCTASE-RXN_r	6.33495	1	RXN-2364	3.75978	2	RXN-15710_r	3.59973	5	2.4.1.79-RXN	4.20279	2	RXN-20733	4.24687	3	RXN-12330	4.28051	5	RXN-20732	4.3012	3	RXN-10966	4.45758	3	RXN-13423	4.21698	NIL	RXN-12024	3.79066	3	RXN-8807_f	7.16532	2	RXN-9230	5.80783	2	RXN-12024
	RXN-11186	4.35952	1	RXN-11186	4.35952	1	RXN-14818	7.62532	1	RXN-12085_f	6.70545	NIL	RXN-13483	6.33775	NIL	RXN-12775_f	3.76005	4	LXULRU5P-RXN	3.59973	5	RXN-8178	4.20282	NIL	RXN-12265	4.24997	3	BA7DEHYDRA-RXN	4.28215	4	RXN-12920	4.30344	NIL	3.4.17.13-RXN	4.4588	3	GLYCINE-N-CHOLOYLTRANSFERASE-RXN	4.21711	2	RXN-9310	3.79128	4	RXN-8807_r	7.16532	2	RXN-20367	5.82523	2	RXN-8859
	RXN-14425	4.36673	1	RXN-14425	4.36673	1	RXN-14859_f	7.62632	1	RXN-12085_r	6.70545	NIL	RXN-14495	6.34449	1	RXN-12775_r	3.76005	4	RXN-18192_f	3.59973	NIL	RXN-19707	4.20324	3	RXN-14844	4.2513	5	1.8.1.15-RXN	4.28248	1	RXN-12115	4.3039	1	RXN-18484	4.45922	3	RXN-13972	4.2175	NIL	HIPPURATE-HYDROLASE-RXN	3.7963	3	RXN-19191	7.18035	NIL	RXN-10085	5.82701	2	RXN-18058
	1.2.1.67-RXN	4.3688	1	1.2.1.67-RXN	4.3688	1	RXN-14859_r	7.62632	1	RXN-17981	6.71078	1	RXN-11209_f	6.3553	1	RXN-15979	3.7621	NIL	RXN-18192_r	3.59973	NIL	RXN-9993	4.2037	2	RXN-16427	4.25256	2	RXN-2223	4.28369	NIL	THIAZOLSYN2-RXN	4.3056	2	URA-PHOSPH-RXN_f	4.46151	2	RXN-19756	4.21813	NIL	RXN-11663	3.80118	2	RXN-15013_f	7.18611	NIL	RXN-14051_f	5.833	2	2.3.1.92-RXN
	RXN-15637	4.37727	NIL	RXN-15637	4.37727	NIL	2KETO-4METHYL-PENTANOATE-DEHYDROG-RXN	7.64453	1	R203-RXN	6.71306	NIL	RXN-11209_r	6.3553	1	BIOTINIDASE-RXN	3.76326	3	RXN-19208_f	3.59973	NIL	RXN-9699	4.20442	2	RXN-19294_f	4.25314	5	RXN-9048	4.28452	1	RXN-14980	4.30681	3	URA-PHOSPH-RXN_r	4.46151	2	RXN-9685	4.22029	5	PNPOXI-RXN	3.80134	1	RXN-15013_r	7.18611	NIL	RXN-14051_r	5.833	2	RXN-19755
	RXN-18647	4.37863	NIL	RXN-18647	4.37863	NIL	RXN-18104	7.64468	NIL	RXN-14860	6.71309	NIL	RXN-10899	6.36508	NIL	GLYOXI-RXN_f	3.76544	4	RXN-19208_r	3.59973	NIL	RXNQT-4344	4.20673	NIL	RXN-19294_r	4.25314	5	RXN-18257	4.28533	2	3.2.1.18-RXN	4.30955	3	2.5.1.19-RXN_f	4.46161	2	RXN-19572	4.22113	3	KYNURENINASE-RXN	3.80767	3	RXN0-7075_f	7.19069	2	ISOBUTYRYL-COA-MUTASE-RXN_f	5.85464	5	RXN-15961
	RXN-18717	4.37865	NIL	RXN-18717	4.37865	NIL	1.1.1.64-RXN	7.6542	1	GCVMULTI-RXN_f	6.73267	NIL	RXN-10900	6.36508	NIL	GLYOXI-RXN_r	3.76544	4	RXN-14572	3.59973	5	RXN18C3-10	4.21088	NIL	RXN0-5363_f	4.25545	NIL	RXN-18254	4.28722	2	ACYLCARNITINE-HYDROLASE-RXN	4.31025	3	2.5.1.19-RXN_r	4.46161	2	RXN-18337	4.22241	2	RXN-10102_f	3.80982	5	RXN0-7075_r	7.19069	2	ISOBUTYRYL-COA-MUTASE-RXN_r	5.85464	5	RXN-8471
	RXN-664	4.37976	1	RXN-664	4.37976	1	RXN-15357_f	7.655	NIL	GCVMULTI-RXN_r	6.73267	NIL	RXN-10898	6.36508	NIL	4.2.1.103-RXN	3.7663	4	3.2.1.143-RXN	3.59973	3	RXN-17435	4.21927	4	RXN0-5363_r	4.25545	NIL	RXN-13439	4.28839	6	RXN-19336	4.31315	NIL	RXN-17139	4.46448	1	RXN-15064	4.22284	NIL	RXN-10102_r	3.80982	5	R268-RXN	7.19288	NIL	RXN-18372_f	5.87757	2	RXN-11458
	RXN-15033_f	4.38034	NIL	RXN-15033_f	4.38034	NIL	RXN-15357_r	7.655	NIL	RXN-16513	6.73721	NIL	RXN-10901	6.36508	NIL	RXN-17737	3.76986	3	RXN-13683	3.59973	3	RXN-19171	4.21952	NIL	RXN0-7002	4.25608	3	4.2.2.15-RXN	4.29441	4	RIBOSYLHOMOCYSTEINASE-RXN	4.31449	4	RXN-18151	4.46476	NIL	RXN-13967	4.22841	2	RXN-10846	3.80999	4	RXN-13392	7.19815	NIL	RXN-18372_r	5.87757	2	RXN-12846
	RXN-15033_r	4.38034	NIL	RXN-15033_r	4.38034	NIL	RXN-16927	7.66006	NIL	1.5.1.28-RXN_f	6.73929	1	RXN-17535	6.36803	NIL	DIMETHYLPROPIOTHETIN-DETHIOMETHYLASE-RXN	3.77034	4	RXN0-5329_f	3.59973	5	CHOLOYLGLYCINE-HYDROLASE-RXN	4.21974	3	RXN-18004	4.25615	NIL	RXN-4222	4.29574	NIL	RXN-19581	4.31683	3	RXN-14089	4.46597	3	2.4.1.141-RXN	4.22906	2	RXN-11751_f	3.81049	3	RXN-16649	7.19974	3	ACETYL-COA-HYDROLASE-RXN	5.8918	3	RXN1F-20
	RXN-9882	4.3846	1	RXN-9882	4.3846	1	1.3.1.56-RXN	7.67523	1	1.5.1.28-RXN_r	6.73929	1	RXN-14486	6.37276	1	RXN-7893	3.77432	NIL	RXN0-5329_r	3.59973	5	RXN-19378	4.21987	3	RXN-15233_f	4.25615	NIL	RXN-7866	4.29626	1	ARYLDIALKYL-PHOSPHATASE-RXN	4.31786	3	RXN-18414	4.46636	NIL	RXN-11075	4.23024	NIL	RXN-11751_r	3.81049	3	ACECOATRANS-RXN	7.20735	2	ACECOATRANS-RXN	5.89617	2	RXN-11258
	RXN-17225	4.38578	NIL	RXN-17225	4.38578	NIL	RXN-19981	7.67785	1	RXN-16885	6.74836	NIL	1.5.1.34-RXN	6.37979	1	RXN-16870	3.77435	NIL	H2SOXIREDPYRO-RXN	3.59973	1	RXN0-5227	4.22062	3	RXN-15233_r	4.25615	NIL	RXN-7855	4.29626	1	CYCLOEUCALENOL-CYCLOISOMERASE-RXN	4.32064	5	RXN-20673	4.46813	NIL	TEICHOICSYN2-RXN	4.23025	2	RXN0-3543	3.8119	NIL	R11-RXN_f	7.20735	2	R11-RXN_f	5.89617	2	RXN-5822
	RXN-12925	4.38766	1	RXN-12925	4.38766	1	RXN-19982	7.67785	1	RXN-9480_f	6.75916	1	RXN-18712	6.39461	NIL	RXN-20544	3.77487	3	OHBUTYRYL-COA-EPIM-RXN_f	3.59973	5	RXN-17829_f	4.22073	NIL	3.1.3.46-RXN	4.25744	3	RXN-12320	4.29684	2	NMNNUCLEOSID-RXN	4.32067	3	RXN-9993	4.46836	2	RXN-13733_f	4.23411	3	RXN-13154	3.81385	NIL	R11-RXN_r	7.20735	2	R11-RXN_r	5.89617	2	RXN-13534
	CARVEOL-DEHYDROGENASE-RXN	4.38874	1	CARVEOL-DEHYDROGENASE-RXN	4.38874	1	RXN-17414	7.719	1	RXN-9480_r	6.75916	1	RXN-7911	6.3977	NIL	UROGENDECARBOX-RXN	3.77672	4	OHBUTYRYL-COA-EPIM-RXN_r	3.59973	5	RXN-17829_r	4.22073	NIL	RXN-11753_f	4.25839	NIL	RXN-18180	4.29726	NIL	RXN0-2381_f	4.32135	4	RXN-15791	4.47125	NIL	RXN-13733_r	4.23411	3	RXN-13908	3.81783	4	RXN-15727	7.20735	2	RXN-15727	5.89617	2	4.3.1.4-RXN_f
	RXN-15048	4.39042	1	RXN-15048	4.39042	1	RXN-17412_f	7.719	1	1.1.1.285-RXN	6.7694	1	RXN-12997	6.40416	1	METHYL-COM-HTP-RXN_f	3.77774	2	RXN-15948_f	3.59973	5	LIPIDADISACCHARIDESYNTH-RXN	4.22183	2	RXN-11753_r	4.25839	NIL	RXN-18181	4.29726	NIL	RXN0-2381_r	4.32135	4	RXN-20322	4.47198	NIL	RXN-8961_f	4.23473	4	RXN-21248	3.81892	NIL	RXN-19314	7.20961	3	RXN0-6510_f	5.90039	5	4.3.1.4-RXN_r
	RXN-14532	4.39042	1	RXN-14532	4.39042	1	RXN-17412_r	7.719	1	RXN-20435	6.78004	1	RXN-18717	6.41089	NIL	METHYL-COM-HTP-RXN_r	3.77774	2	RXN-15948_r	3.59973	5	RXN-18065	4.22217	NIL	RXN-20921	4.26081	NIL	RXN-19167	4.29799	2	RXN-16902	4.3216	NIL	RXN-19361	4.47225	2	RXN-8961_r	4.23473	4	RXN-12728	3.81984	NIL	RXN-17326	7.21021	2	RXN0-6510_r	5.90039	5	RXN-1082
	RXN-14184_f	4.39042	1	RXN-14184_f	4.39042	1	KYNURENINE-3-MONOOXYGENASE-RXN	7.73098	1	RXN-18718	6.78364	NIL	RXN-7970	6.4167	1	RXN-19178	3.78048	5	RXN-13659	3.59973	NIL	RXN-13207	4.22367	NIL	RXN-12330	4.26229	5	RXN-13824	4.2994	NIL	RXN-19335	4.32218	2	RXN-16778	4.47457	2	RXN-13315	4.23626	NIL	RXN-19975	3.82131	NIL	CITRAMALYL-COA-LYASE-RXN	7.21086	4	2.8.3.13-RXN_f	5.90375	2	RXN-7947
	RXN-14184_r	4.39042	1	RXN-14184_r	4.39042	1	RXN-16539	7.73147	NIL	RXN-9246	6.79689	1	ALBENDAZOLE-MONOOXYGENASE-RXN	6.42436	1	RXN-3221	3.78085	5	RXN0-5298_f	3.59973	5	RXN-21094	4.2237	NIL	RXN-10895	4.26634	NIL	RXN-12529	4.29999	NIL	RXN-8475	4.3228	2	NAD+-ADP-RIBOSYLTRANSFERASE-RXN_f	4.47629	2	RXN-11072	4.23932	NIL	RXN-11649	3.82234	NIL	RXN-13231_f	7.21086	4	2.8.3.13-RXN_r	5.90375	2	RXN-12150
	RXN-16062	4.39075	1	RXN-16062	4.39075	1	RXN-13750_f	7.73463	1	RXN-9952	6.80344	1	RXN-5041	6.43072	NIL	RXN1F-151	3.78362	5	RXN0-5298_r	3.59973	5	OLIGOGALACTURONIDE-LYASE-RXN	4.22501	4	3.1.1.47-RXN	4.26638	3	RXN-15966	4.30074	NIL	RXN-12407_f	4.32346	2	NAD+-ADP-RIBOSYLTRANSFERASE-RXN_r	4.47629	2	RXN-11257	4.24005	NIL	RXN-17352	3.82425	1	RXN-13231_r	7.21086	4	CITRAMALYL-COA-LYASE-RXN	5.91592	4	ARACHIDONATE-12-LIPOXYGENASE-RXN
	RXN-5166	4.39851	NIL	RXN-5166	4.39851	NIL	RXN-13750_r	7.73463	1	MYO-INOSITOL-2-DEHYDROGENASE-RXN_f	6.83051	1	RXN-4144	6.45301	1	RXN-10739	3.78398	NIL	RXN-5066	3.59973	NIL	RXN-18378	4.22654	4	RXN-17837	4.26668	2	RXN-16711	4.30336	4	RXN-12407_r	4.32346	2	5.1.3.23-RXN	4.4787	5	RXN-8885	4.24026	4	RXN-7946	3.82479	5	RXN-8958	7.21387	5	RXN-13231_f	5.91592	4	RXN-20707
	#NAME?	4.39851	1	#NAME?	4.39851	1	RXN-17409	7.76609	1	MYO-INOSITOL-2-DEHYDROGENASE-RXN_r	6.83051	1	RXN-20102	6.46612	1	RXN-8846	3.78435	NIL	RXN-2463_f	3.59973	4	RXN-18996	4.22967	2	GTP-CYCLOHYDRO-I-RXN	4.26731	3	RXN0-4841_f	4.30485	5	RXN-12812_f	4.32594	2	RXN-4222	4.47872	NIL	RXN-8793	4.24048	4	RXN-10897	3.82494	NIL	RXN-20370	7.21943	NIL	RXN-13231_r	5.91592	4	RXN-18065
	RXN-5165	4.39851	NIL	RXN-5165	4.39851	NIL	RXN-13341	7.76897	1	RXN-14246_f	6.84458	NIL	1.1.1.170-RXN	6.46612	1	PROTOPORGENOXI-RXN	3.78462	1	RXN-2463_r	3.59973	4	RXN-17516	4.23024	2	RIBULOSE-BISPHOSPHATE-CARBOXYLASE-RXN	4.26951	4	RXN0-4841_r	4.30485	5	RXN-12812_r	4.32594	2	RXN-13517	4.48074	NIL	RXN-14289	4.24052	3	RXN-17079	3.82644	NIL	RXN-20368	7.21943	2	MALYL-COA-LYASE-RXN_f	5.92236	4	RXN-21211
	#NAME?	4.39851	1	#NAME?	4.39851	1	2KETO-3METHYLVALERATE-RXN_f	7.80385	1	RXN-14246_r	6.84458	NIL	RXN-13926	6.46612	1	RXN-4303	3.7854	2	RXN-18477_f	3.59973	5	RXN-14948	4.23064	5	NMNNUCLEOSID-RXN	4.27079	3	RXN-20581	4.3054	1	RXN-12230	4.32622	2	RXN-8476	4.48183	2	RXN-8992	4.24303	2	RXN-19136	3.82798	NIL	RXN-20369	7.21943	2	MALYL-COA-LYASE-RXN_r	5.92236	4	RXN-18226
	RXN-10094	4.40388	1	RXN-10094	4.40388	1	2KETO-3METHYLVALERATE-RXN_r	7.80385	1	1.1.1.201-RXN_f	6.88672	1	RXN66-23	6.46612	1	RXN-15730	3.78594	4	RXN-18477_r	3.59973	5	RXN-17382	4.23217	2	2.5.1.42-RXN	4.27098	2	RXN-21328	4.30581	NIL	RXN-19047	4.32637	NIL	RXN3O-504	4.48308	NIL	RXN-14361	4.24645	2	RXN-16250	3.83213	3	2.8.3.13-RXN_f	7.223	2	RXN-12168	5.93275	2	RXN-12675_f
	RXN-10095	4.41508	1	RXN-10095	4.41508	1	RXN-17386	7.82599	1	1.1.1.201-RXN_r	6.88672	1	RXN66-18	6.46612	1	RXN-8942	3.78643	NIL	2-METHYLCITRATE-DEHYDRATASE-RXN_f	3.59973	4	2.4.1.210-RXN	4.23405	2	RXN0-4841_f	4.27133	5	RXN-18481	4.30896	3	RXN-8474	4.32776	2	RXN-5472	4.4862	2	RXN-18684	4.24691	NIL	PMPOXI-RXN	3.83265	1	2.8.3.13-RXN_r	7.223	2	RXN-19188	5.93518	NIL	RXN-12675_r
	RXN-9409	4.4183	1	RXN-9409	4.4183	1	RXN-8506	7.85005	1	1.14.12.4-RXN	6.89186	1	RXN66-318	6.46612	1	RXN-14861	3.78709	NIL	2-METHYLCITRATE-DEHYDRATASE-RXN_r	3.59973	4	2.4.1.54-RXN_f	4.23449	2	RXN0-4841_r	4.27133	5	3.2.1.102-RXN	4.30913	3	RXN0-3542_f	4.3279	NIL	RXN-19357	4.48856	NIL	RXN-10846	4.24799	4	PORPHOBILSYNTH-RXN	3.83519	4	RXN-17316	7.24531	2	RXN-16649	5.93754	3	RXN-12329
	RXN-9407	4.4183	1	RXN-9407	4.4183	1	RXN-15855	7.87531	1	NADPH-DEHYDROGENASE-FLAVIN-RXN	6.93859	1	RXN66-313	6.46612	1	RXN-15366	3.78757	2	RXN-18184	3.59973	NIL	2.4.1.54-RXN_r	4.23449	2	RXN-13865_f	4.27181	4	RIBOPHOSPHAT-RXN	4.30916	3	RXN0-3542_r	4.3279	NIL	RXN-8761	4.49141	NIL	RXN0-7010	4.2491	1	RXN-19283	3.83658	1	RXN-9230	7.2537	2	AMINOGLYCOSIDE-N3-ACETYLTRANSFERASE-RXN	5.96303	2	RXN-9502
	RXN-13222	4.4213	1	RXN-13222	4.4213	1	RXN-15367	7.88749	1	RXN-8825	6.94648	1	RXN-20100	6.46612	1	RXN-11984	3.78891	NIL	5.1.2.3-RXN_f	3.59973	5	RXN-19875	4.2368	NIL	RXN-13865_r	4.27181	4	RXN-19230	4.30932	4	RXN-18576	4.33057	4	RXN-15682	4.49227	3	RXN-13277	4.25078	2	RXN-12723	3.8366	4	3.5.4.27-RXN	7.25381	3	DIAMACTRANS-RXN	5.96303	2	RXN-9003
	SEPIAPTERIN-REDUCTASE-RXN	4.4213	1	SEPIAPTERIN-REDUCTASE-RXN	4.4213	1	RXN-16742	7.89467	NIL	RXN0-6565_f	6.949	1	RXN-20095	6.46612	NIL	1.14.20.1-RXN	3.78903	1	5.1.2.3-RXN_r	3.59973	5	RXN0-7002	4.23982	3	3.2.1.156-RXN	4.27298	3	RXN-15962	4.31238	NIL	RXN-17442	4.33531	NIL	RXN-10970	4.49512	3	RXN-19814	4.25386	3	2.1.1.90-RXN	3.8394	2	RXN-19315	7.25421	3	D-AMINO-ACID-N-ACETYLTRANSFERASE-RXN_f	5.96303	2	RXN-12000
	RXN-10093	4.42173	1	RXN-10093	4.42173	1	RXN-14994_f	7.91677	1	RXN0-6565_r	6.949	1	RXN-20116	6.46612	1	RXN-7891	3.78908	NIL	RXN-18144	3.59973	NIL	RXN-20788	4.24061	3	RXN-12718	4.27325	3	RXN-19313	4.3126	3	ACNEULY-RXN_f	4.33561	4	RXN-18420	4.49602	NIL	S-ADENOSYLHOMOCYSTEINE-DEAMINASE-RXN	4.25853	3	RXN-20582	3.84052	1	RXN-21005	7.25434	4	D-AMINO-ACID-N-ACETYLTRANSFERASE-RXN_r	5.96303	2	RXN-14951
	RXN0-3922	4.42818	1	RXN0-3922	4.42818	1	RXN-14994_r	7.91677	1	8-OXOCOFORMYCIN-REDUCTASE-RXN	6.96762	1	RXN-20125	6.46612	1	LINA2-RXN	3.79389	NIL	RXN-8651	3.59973	3	RXN-14560	4.24384	2	RXN-12529	4.2752	NIL	RXN-14688	4.31368	1	ACNEULY-RXN_r	4.33561	4	RXN-9990	4.49636	2	RXN-20242	4.25961	2	RXN-19284	3.84078	1	RXN-11290	7.26163	3	RXN-19733	5.96303	2	RXN-14942_f
	RXN-15495	4.4348	NIL	RXN-15495	4.4348	NIL	RXN-14760	7.91677	NIL	RXN-16796	6.99093	1	RXN-20109	6.46612	1	1.13.11.38-RXN	3.79412	1	RXN-18195_f	3.59973	NIL	RXN-18295	4.24593	2	RXN-7241	4.27776	3	RXN-8476	4.31471	2	RXN-15313	4.33561	4	RXN-19339	4.50128	2	CHOLOYLGLYCINE-HYDROLASE-RXN	4.26075	3	RXN-12073	3.84459	1	MALYL-COA-LYASE-RXN_f	7.26394	4	N6-HYDROXYLYSINE-O-ACETYLTRANSFERASE-RXN	5.96303	2	RXN-14942_r
	RXN-16859	4.43554	NIL	RXN-16859	4.43554	NIL	RXN-19983	7.92414	NIL	RXN-16580	6.99121	NIL	RXN-14493	6.46825	1	RXN-19300	3.79582	2	RXN-18195_r	3.59973	NIL	RXN-17138	4.25002	1	RXN-10942	4.27776	3	RXN-18250	4.3189	2	RXN-18554	4.33837	4	DOLICHYL-PHOSPHATASE-RXN	4.50231	3	RXN-13337	4.26103	4	RXN-15756	3.8452	NIL	MALYL-COA-LYASE-RXN_r	7.26394	4	RXN-17081	5.96303	NIL	RXN-18066
	TCCOL-RXN	4.44053	NIL	TCCOL-RXN	4.44053	NIL	RXN66-350_f	7.92672	1	RXN-8820	6.99863	1	RXN-16950	6.47415	1	RXN-11976	3.79583	NIL	RXN-16391	3.59973	5	2.4.1.83-RXN	4.25065	2	1.21.3.1-RXN	4.27834	1	RXN-13799	4.32079	NIL	RXN-17406	4.33855	2	RXN-12958_f	4.50258	2	RXN-18260	4.26132	2	RXN-11127	3.84765	NIL	GLYOXI-RXN_f	7.27012	4	2.3.1.80-RXN	5.96303	2	RXN-10620
	RXN-9146	4.4433	NIL	RXN-9146	4.4433	NIL	RXN66-350_r	7.92672	1	RXN-16797	6.99863	1	1.2.1.45-RXN	6.47631	1	RXN0-275	3.79673	NIL	5.3.3.13-RXN_f	3.59973	5	RXN-16602	4.25065	2	ATP-ADENYLYLTRANSFERASE-RXN_f	4.2792	2	2.5.1.67-RXN	4.3213	2	RXN-13609_f	4.34266	4	RXN-12958_r	4.50258	2	RXN-19359	4.26228	2	RXN-18554	3.84874	4	GLYOXI-RXN_r	7.27012	4	RXN-20153	5.96303	2	RXN-15730
	RXN-9880	4.44472	1	RXN-9880	4.44472	1	1.1.1.248-RXN_f	7.92912	1	RXN-12446	7.00939	1	RXN1UA-50	6.49314	1	RXN-19306	3.79813	2	5.3.3.13-RXN_r	3.59973	5	RXN-9995	4.25234	2	ATP-ADENYLYLTRANSFERASE-RXN_r	4.2792	2	RXN-18246	4.32339	2	RXN-13609_r	4.34266	4	LAMINARIBIOSE-PHOSPHORYLASE-RXN	4.50258	2	RXN-19700	4.2624	2	RXN-11187	3.84882	2	1.8.98.1-RXN	7.27154	1	RXN-12710	5.96303	2	RXN-12326
	RXN-18716	4.4559	NIL	RXN-18716	4.4559	NIL	1.1.1.248-RXN_r	7.92912	1	RXN-11929	7.02469	1	RXN-10032	6.4999	1	RXN-16311_f	3.79843	NIL	RXN-16264	3.59973	5	RXN-8271	4.25313	NIL	RXN-15264	4.28326	2	RXN-14227	4.32423	3	RIBOFLAVINASE-RXN_f	4.34323	3	RIBOPHOSPHAT-RXN	4.50292	3	RXN-19973	4.26406	NIL	RXN-13630	3.84918	NIL	4.1.3.26-RXN	7.2767	4	RXN-13678	5.96303	2	RXN-17809
	ALBENDAZOLE-MONOOXYGENASE-RXN	4.45932	1	ALBENDAZOLE-MONOOXYGENASE-RXN	4.45932	1	RXN-11674_f	7.97842	1	RXN-12151	7.0473	NIL	RXN-17335	6.5002	1	RXN-16311_r	3.79843	NIL	RXN-17393	3.59973	NIL	RXN-13516	4.25492	NIL	TRYPSYN-RXN	4.28452	4	RXN-15298	4.32821	4	RIBOFLAVINASE-RXN_r	4.34323	3	RXN-18150	4.5031	3	RXN-16582	4.26583	NIL	RXN-13370	3.84928	1	RXN-9666	7.28341	3	RXN-9760	5.9652	NIL	2.3.1.131-RXN
	1.2.1.13-RXN	4.46437	1	1.2.1.13-RXN	4.46437	1	RXN-11674_r	7.97842	1	RXN-12445	7.04924	1	4-SULFOBENZOATE-34-DIOXYGENASE-RXN	6.50069	1	RXN-19124	3.79896	4	RXN-15344_f	3.59973	5	RXN-12753	4.25848	NIL	RXN-17380	4.28572	3	RXN-11133	4.3289	3	GTP-CYCLOHYDRO-I-RXN	4.34469	3	RXN-15278	4.5047	2	RXN-111	4.26585	5	RXN-9588	3.84977	NIL	MCHMBARK-RXN_f	7.28896	3	RXN-8958	5.9691	5	STERYL-SULFATASE-RXN
	LONG-CHAIN-ALCOHOL-DEHYDROGENASE-RXN_f	4.47399	1	LONG-CHAIN-ALCOHOL-DEHYDROGENASE-RXN_f	4.47399	1	RXN-16740	8.02405	NIL	RXN-11566	7.062	1	HYDROXYPHENYLPYRUVATE-REDUCTASE-RXN	6.51235	1	RXN-9401	3.79925	NIL	RXN-15344_r	3.59973	5	RXN-12754	4.25848	NIL	TRANSALDOL-RXN_f	4.28733	2	RXN-5841	4.32949	3	RXN-18841	4.34592	NIL	RXN-18180	4.50476	NIL	RXN-18379_f	4.26788	2	RXN-19298	3.84983	2	MCHMBARK-RXN_r	7.28896	3	RXN-8807_f	5.98294	2	COA-DISULFIDE-REDUCTASE-NADH-RXN_f
	LONG-CHAIN-ALCOHOL-DEHYDROGENASE-RXN_r	4.47399	1	LONG-CHAIN-ALCOHOL-DEHYDROGENASE-RXN_r	4.47399	1	RXN-16579	8.03271	NIL	RXN-15365	7.06502	NIL	RXN-18716	6.5372	NIL	RXN-9400	3.79925	NIL	RXN-9640	3.59973	NIL	RXN-15805	4.25955	4	TRANSALDOL-RXN_r	4.28733	2	RXN-20582	4.32974	1	RXN-18847	4.34592	NIL	RXN-18181	4.50476	NIL	RXN-18379_r	4.26788	2	STERYL-SULFATASE-RXN	3.85181	3	METHYLMALONYL-COA-MUT-RXN_f	7.29014	5	RXN-8807_r	5.98294	2	COA-DISULFIDE-REDUCTASE-NADH-RXN_r
	RXN-16566	4.48588	NIL	RXN-16566	4.48588	NIL	RXN-20920	8.04397	NIL	11-BETA-HYDROXYSTEROID-DEHYDROGENASE-RXN_f	7.11404	1	CHLOROMALERED-RXN	6.53861	1	RXN-9947	3.79925	NIL	RXN0-5285_f	3.59973	NIL	RXN-14400	4.26344	2	RXN-19333	4.28747	NIL	2.1.1.132-RXN	4.32988	2	RXN-15791	4.34758	NIL	RXN-14063	4.50747	2	RXN1QP9-73	4.27025	NIL	RXN-19150	3.85423	5	METHYLMALONYL-COA-MUT-RXN_r	7.29014	5	RXN-18752_f	6.00333	5	RXN-13648
	RXN-12930	4.48588	NIL	RXN-12930	4.48588	NIL	RXN-17395	8.04552	1	11-BETA-HYDROXYSTEROID-DEHYDROGENASE-RXN_r	7.11404	1	RXN-11565	6.54923	1	RXN-9404	3.79925	NIL	RXN0-5285_r	3.59973	NIL	RXN-12744	4.26361	NIL	IGPSYN-RXN	4.28912	4	RXN-20983	4.33367	NIL	RXN-14876_f	4.35062	5	BETAGALACTOSID-RXN	4.50815	3	RXN-14392	4.27253	NIL	N-ACETYLGLUCOSAMINE-DEACETYLASE-RXN_f	3.85502	3	RXN-17787	7.29293	2	RXN-18752_r	6.00333	5	RXN-18486
	RXN-12921	4.48588	NIL	RXN-12921	4.48588	NIL	RXN-7632	8.05848	1	RXN-17339	7.11594	1	RXN-14484	6.54927	1	RXN-21277	3.79947	NIL	RXN-9781_f	3.59973	5	RXN-19299	4.26582	2	RXN0-5123	4.28924	NIL	RXN-18105	4.33615	NIL	RXN-14876_r	4.35062	5	RXN-18060	4.51095	NIL	RXN-17402	4.27419	1	N-ACETYLGLUCOSAMINE-DEACETYLASE-RXN_r	3.85502	3	2.3.1.155-RXN	7.29293	2	3.5.4.27-RXN	6.00968	3	RXN-14266
	RXN-12929	4.48588	NIL	RXN-12929	4.48588	NIL	RXN-12446	8.06824	1	RXN-13476	7.11752	1	RXN-13564	6.55645	NIL	RXN0-2382	3.80051	4	RXN-9781_r	3.59973	5	RXN18HP-6	4.2662	NIL	GLYOXII-RXN	4.28925	3	GALACTOSIDE-3-FUCOSYLTRANSFERASE-RXN	4.33866	2	RXN-19043	4.35065	NIL	ACYLCARNITINE-HYDROLASE-RXN	4.51264	3	RXN-12841	4.27608	5	RXN-15742	3.85741	NIL	RXN-17782	7.29293	2	RXN-18566	6.01367	2	RXN-7854
	RXN-12095	4.48597	1	RXN-12095	4.48597	1	RETINOL-DEHYDROGENASE-RXN_f	8.07163	1	RXN-18713	7.12321	NIL	RXN-13158	6.5603	1	RETICULINE-OXIDASE-RXN	3.80052	1	XYLONATE-DEHYDRATASE-RXN	3.59973	4	3.2.1.17-RXN	4.26751	3	RXN-13208	4.28988	NIL	RXN-20557	4.343	3	RXN-8635	4.35213	1	RXN-8288	4.51355	NIL	RXN-17002	4.2769	NIL	RXN1F-169	3.8591	NIL	RXN-16560_f	7.29293	2	RXN-20360	6.02158	2	RXN-18484
	RXN-11264	4.49329	NIL	RXN-11264	4.49329	NIL	RETINOL-DEHYDROGENASE-RXN_r	8.07163	1	RXN-20102	7.12515	1	RXN-11928	6.56507	1	RXN-10082	3.80114	5	RXN4FS-12	3.59973	2	RXN-19177	4.26798	NIL	RXN-961	4.29041	NIL	RXN-12234_f	4.34362	NIL	RXN-22	4.35794	4	RXN-19051	4.51427	4	RXN-20571	4.27887	1	PROTOPORGENOXI-RXN	3.86179	1	RXN-16560_r	7.29293	2	RXNMETA-12671	6.02273	3	RXN-13535
	RXN-15496	4.4957	NIL	RXN-15496	4.4957	NIL	RXN-12562	8.07163	NIL	1.1.1.170-RXN	7.12515	1	RXN-20373	6.56507	1	R83-RXN	3.80272	3	RXN0-5306	3.59973	5	RXN-16711	4.26809	4	RXN-13177	4.29122	3	RXN-12234_r	4.34362	NIL	RXN-15298	4.3597	4	RXN-14113	4.51584	3	RXN-20572	4.27887	1	RXN-9394	3.86306	3	RXN-17791	7.29293	2	RXN-20371	6.02641	2	RXN3DJ-11230
	RXN-21377	4.50035	NIL	RXN-21377	4.50035	NIL	RXN-12577	8.07163	NIL	RXN-13926	7.12515	1	RXN-11959	6.56507	1	RXN-4444	3.80473	1	RXN-12752	3.59973	5	RXN-13512	4.26865	NIL	RXN-10966	4.29381	3	RXN0-7001	4.34384	3	RXN-15413	4.35985	NIL	RXN-13181	4.51757	3	RXN-21122	4.279	NIL	RXN-9421	3.86306	3	RXN-17778	7.29293	2	MCHMBARK-RXN_f	6.02939	3	2.4.1.141-RXN
	RXN-12932	4.50103	NIL	RXN-12932	4.50103	NIL	RXN-16546	8.07173	NIL	RXN66-23	7.12515	1	RXN-20374	6.56507	1	R312-RXN	3.80532	NIL	AMINO-ACID-RACEMASE-RXN_f	3.59973	5	RXN-11490	4.26942	2	RXN-20575	4.29396	1	RXN-19170	4.34553	NIL	CHOLOYLGLYCINE-HYDROLASE-RXN	4.36215	3	RXN-13811	4.51884	3	RXN-21211	4.28152	NIL	RXN-9393	3.86306	3	RXN-16561	7.29293	2	MCHMBARK-RXN_r	6.02939	3	TEICHOICSYN2-RXN
	RXN-18003	4.50201	NIL	RXN-18003	4.50201	NIL	RXNQT-4334	8.07715	1	RXN66-18	7.12515	1	RXN-20441	6.56507	1	MHPCHYDROL-RXN	3.80668	3	AMINO-ACID-RACEMASE-RXN_r	3.59973	5	RXN-13204	4.27588	3	RXN-12812_f	4.29537	2	RXN-13627	4.34792	NIL	RXN-17178	4.36372	NIL	RXN-15264	4.51884	2	RXN-4313	4.28228	NIL	RXN-7895	3.86412	NIL	RXN-17116	7.29293	2	RXN-20664	6.03251	NIL	RXN-9051
	RXN-15229	4.51316	NIL	RXN-15229	4.51316	NIL	RXN-11390	8.09034	1	RXN66-318	7.12515	1	RXN-11938	6.56507	1	ITACONYL-COA-HYDRATASE-RXN	3.80739	4	RXN-18502	3.59973	4	RXN-17061	4.27659	NIL	RXN-12812_r	4.29537	2	RXN-16259	4.34794	NIL	RXN-15909	4.36409	3	RXN18C3-12	4.52049	NIL	RXN-20241	4.2835	2	RXN-7733	3.86602	1	RXN-20367	7.29716	2	RXN-9995	6.04565	2	RXN1G-811
	RXN-16416	4.51624	NIL	RXN-16416	4.51624	NIL	RXN-17976	8.10508	1	RXN66-313	7.12515	1	RXN-11933	6.56507	1	TIGLYLCOA-HYDROXY-RXN_f	3.81077	4	RXN-14764	3.59973	NIL	RXN-13439	4.2781	6	RXN-13533	4.29587	NIL	RXN-16588	4.3499	NIL	3.2.1.149-RXN	4.36629	3	RXN-17382	4.52524	2	R8-RXN	4.28353	2	RXN-14632	3.86661	NIL	GLYOXII-RXN	7.29809	3	ATP-CITRATE-PRO-S--LYASE-RXN	6.04699	2	RXN1G-807
	RXN-9802	4.51624	NIL	RXN-9802	4.51624	NIL	RXN-11506	8.1191	NIL	RXN-20100	7.12515	1	D-PINITOL-DEHYDROGENASE-RXN_f	6.56537	1	TIGLYLCOA-HYDROXY-RXN_r	3.81077	4	RXN-13873_f	3.59973	NIL	RXN-18151	4.27916	NIL	RXN-22	4.29625	4	RXN-19581	4.35193	3	RXN-7866	4.36775	1	2.4.1.151-RXN	4.52911	2	DOLICHYLDIPHOSPHATASE-RXN_f	4.28548	3	RXN-17351	3.86846	1	RXN-21171	7.3017	NIL	RXN-17787	6.05911	2	RXN1G-810
	MANNITOL-2-DEHYDROGENASE-NADP+-RXN_f	4.51733	1	MANNITOL-2-DEHYDROGENASE-NADP+-RXN_f	4.51733	1	RXN-8963_f	8.1204	1	RXN-20095	7.12515	NIL	D-PINITOL-DEHYDROGENASE-RXN_r	6.56537	1	RXN-20581	3.81409	1	RXN-13873_r	3.59973	NIL	RXN-16600	4.28067	NIL	BTUR2-RXN	4.29716	2	RXN-9993	4.35251	2	RXN-7855	4.36775	1	RXN-8810	4.53197	2	DOLICHYLDIPHOSPHATASE-RXN_r	4.28548	3	RXN-13673	3.87124	2	RXN-16153	7.30642	2	2.3.1.155-RXN	6.05911	2	RXN1G-809
	MANNITOL-2-DEHYDROGENASE-NADP+-RXN_r	4.51733	1	MANNITOL-2-DEHYDROGENASE-NADP+-RXN_r	4.51733	1	RXN-8963_r	8.1204	1	RXN-20116	7.12515	1	RXN-12971	6.57443	1	RXN-20419	3.81706	NIL	RXN-11400	3.59973	NIL	RXN-15224	4.28104	2	ISONOCARDICIN-SYNTHASE-RXN	4.30162	2	RXN-12913	4.35486	NIL	3.1.1.82-RXN	4.36991	3	RXN-17683	4.53331	NIL	RXN-13597	4.28563	2	RXN-10103_f	3.87303	5	RXN-20366	7.31716	NIL	RXN-17782	6.05911	2	RXN1G-808
	1.1.1.289-RXN_f	4.51733	1	1.1.1.289-RXN_f	4.51733	1	RXN0-1861	8.16493	1	RXN-20125	7.12515	1	RXN-10133	6.57856	NIL	SULFOCYS-RXN_f	3.81712	2	FORMIMINOGLUTAMATE-DEIMINASE-RXN	3.59973	3	RXN-19703	4.28801	2	RXN-17844	4.30162	2	RXN-886	4.35528	NIL	N-ACETYLNEURAMINATE-SYNTHASE-RXN	4.37281	2	RXN-19333	4.53347	NIL	RXN-18554	4.28612	4	RXN-10103_r	3.87303	5	RXN-19188	7.32042	NIL	RXN-16560_f	6.05911	2	RXN-13677
	1.1.1.289-RXN_r	4.51733	1	1.1.1.289-RXN_r	4.51733	1	RXN-15607	8.17108	NIL	RXN-20109	7.12515	1	RXN-16801	6.57882	1	SULFOCYS-RXN_r	3.81712	2	RXN-18187_f	3.59973	NIL	RXN-18036	4.28941	NIL	RXN-8746	4.3031	3	RXN-15502	4.35984	NIL	RXN-17438	4.37352	NIL	RXN-19358	4.5358	2	RXNQT-4344	4.29098	NIL	RXN-11454	3.87389	1	RXN-18372_f	7.33089	2	RXN-16560_r	6.05911	2	RXN-19299
	LONG-CHAIN-ALDEHYDE-DEHYDROGENASE-RXN	4.51827	1	LONG-CHAIN-ALDEHYDE-DEHYDROGENASE-RXN	4.51827	1	1.2.1.58-RXN	8.17932	1	RXN-9874	7.1518	NIL	RXN-13443	6.57912	1	RXN1F-150	3.81736	5	RXN-18187_r	3.59973	NIL	RXN0-5187	4.28968	3	RXN-17334	4.30513	NIL	IGPSYN-RXN	4.36176	4	RXN-18414	4.37727	NIL	RXN-15330	4.53749	NIL	CYCLOARTENOL-SYNTHASE-RXN	4.29118	5	RXN-16873	3.87549	NIL	RXN-18372_r	7.33089	2	RXN-17791	6.05911	2	RXN-13335_f
	RXN-16652	4.5236	1	RXN-16652	4.5236	1	GLUTSEMIALDEHYDROG-RXN	8.19112	1	RXN-16799	7.16608	1	RXN-12994	6.58842	1	GLYOXII-RXN	3.8174	3	5.1.3.21-RXN_f	3.59973	5	CYCLOEUCALENOL-CYCLOISOMERASE-RXN	4.29322	5	HEMEOSYN-RXN	4.30655	2	RXN-14844	4.36185	5	4-ACETAMIDOBUTYRYL-COA-DEACETYLASE-RXN	4.37818	3	RXN-11806	4.54046	NIL	LANOSTEROL-SYNTHASE-RXN	4.29118	5	RXN-9733	3.87574	3	RXN-10085	7.34287	2	RXN-17778	6.05911	2	RXN-13335_r
	RXN-12080_f	4.52732	NIL	RXN-12080_f	4.52732	NIL	RXN-13363_f	8.19397	NIL	RXN-13069	7.16799	1	ERYTHRON4PDEHYDROG-RXN	6.59153	1	RXN-11909	3.81885	NIL	5.1.3.21-RXN_r	3.59973	5	RXN-12319	4.296	2	RXN-17809	4.30857	4	RXN-8766	4.36375	2	RXN-15376_f	4.3782	2	RXN-20983	4.54174	NIL	RXN-15749	4.29131	NIL	RXN-8038	3.87623	5	RXN-13029	7.36013	4	RXN-16561	6.05911	2	RXN-7866
	RXN-12080_r	4.52732	NIL	RXN-12080_r	4.52732	NIL	RXN-13363_r	8.19397	NIL	RXN-9873	7.17424	NIL	RXN-14466	6.59934	NIL	RXN-9674	3.82018	3	RXN0-5061	3.59999	NIL	RXN-9000	4.2962	2	RXN-18217	4.31088	3	RXN-13403	4.36553	2	RXN-15376_r	4.3782	2	RXN-15298	4.54328	4	RXN-12757_f	4.2927	5	RXN-16201	3.87689	3	RXN-14266	7.36365	4	RXN-17116	6.05911	2	RXN-7855
	RXN0-5375	4.52746	1	RXN0-5375	4.52746	1	RXN-10841_f	8.19397	1	RXN-16924	7.17461	NIL	RXN-12446	6.61962	1	RXN-10644	3.82159	5	RXN-11663	3.60024	2	RXN-19051	4.29953	4	RXN-18218	4.31088	3	RXN-5472	4.36695	2	RXN-14844	4.37885	5	RXN-15805	4.544	4	RXN-12757_r	4.2927	5	NICOTINE-DEHYDROGENASE-RXN	3.87694	1	RXN-11054	7.37634	4	RXN-12745	6.07694	NIL	RXN18C3-13
	RXN-12072	4.54108	1	RXN-12072	4.54108	1	RXN-10841_r	8.19397	1	RXN-13483	7.18772	NIL	RXN-15637	6.62132	NIL	RXN-16869	3.82297	NIL	ARGININE-DEIMINASE-RXN_f	3.60113	3	RXNQT-4397	4.29958	NIL	RXN-11182	4.31088	3	ECDYSONE-OXIDASE-RXN	4.36952	1	RXN-16093	4.37909	NIL	RXN-17170	4.5444	NIL	RXN-17406	4.29376	2	PENICILLIN-AMIDASE-RXN	3.88291	3	RXN-9646	7.38344	NIL	RXN-20379	6.07975	2	2.8.3.17-RXN
	RXN-16860	4.5419	NIL	RXN-16860	4.5419	NIL	6PGLUCONDEHYDROG-RXN	8.20659	1	RXN-7970	7.20397	1	RXN-19429	6.63691	1	RXN-21276	3.82424	NIL	ARGININE-DEIMINASE-RXN_r	3.60113	3	RXN-10607	4.29971	2	RXN-8134	4.31088	3	RXN-19171	4.37048	NIL	RXN-7241	4.38042	3	RXN-11663	4.54561	2	VICIANIN-BETA-GLUCOSIDASE-RXN	4.29468	3	RXN-14640	3.88323	3	RXN-14430	7.39408	1	RXN-9627	6.08029	3	RXN-16711
	RXN-16803	4.55075	1	RXN-16803	4.55075	1	BILIVERDIN-REDUCTASE-RXN	8.21627	1	RXN-16507	7.21144	NIL	RXN-11407	6.63913	1	RXN-13370	3.82477	1	RXN1F-147	3.60432	5	H2PTEROATESYNTH-RXN	4.30015	2	RXN-18227	4.31088	3	RXN-18149	4.37072	NIL	RXN-10942	4.38042	3	RXN-12152	4.5458	NIL	RXN-21328	4.29688	NIL	RXN-666	3.88445	NIL	R125-RXN_f	7.39525	2	RXN-21005	6.08325	4	RXN-19051
	METHYLENETHFDEHYDROG-NADP-RXN_f	4.55709	1	METHYLENETHFDEHYDROG-NADP-RXN_f	4.55709	1	RXN-15464	8.25182	NIL	RXN-11209_f	7.21608	1	URONATE-DEHYDROGENASE-RXN	6.63913	1	RXN-8454	3.82536	1	HYDROXYMANDELONITRILE-LYASE-RXN	3.60643	4	RXN-10616	4.30069	2	RXN-18216	4.31088	3	RXN-9494	4.37325	4	STREPTOMYCIN-3-ADENYLYLTRANSFERASE-RXN	4.38057	2	RXN-11075	4.54919	NIL	RXN-7947	4.29703	5	RXN-11451_f	3.88986	1	R125-RXN_r	7.39525	2	RXN-11112	6.08837	3	RXN-20664
	METHYLENETHFDEHYDROG-NADP-RXN_r	4.55709	1	METHYLENETHFDEHYDROG-NADP-RXN_r	4.55709	1	RXN-9290	8.26731	1	RXN-11209_r	7.21608	1	RXN-12968	6.6487	1	RXN-14046	3.82652	3	RXN-13374	3.60738	1	MTDMBARK-RXN_f	4.3023	1	RXN-18219	4.31088	3	RXN-17380	4.3743	3	BETA-ALANYL-COA-AMMONIA-LYASE-RXN_f	4.38092	4	HISTCYCLOHYD-RXN	4.55246	3	RXN-11079	4.29928	NIL	RXN-11451_r	3.88986	1	RXN-21004	7.41164	4	RXN-19314	6.08943	3	RXN-17785
	RXN-11898	4.56781	1	RXN-11898	4.56781	1	GLUTATHIONE-REDUCT-NADPH-RXN	8.29365	1	RXN66-306	7.21725	1	1.1.1.176-RXN_f	6.65447	1	RXN-16344	3.82703	1	RXN-5471	3.60803	2	MTDMBARK-RXN_r	4.3023	1	RXN-18106	4.31339	NIL	RXN-15681	4.37756	NIL	BETA-ALANYL-COA-AMMONIA-LYASE-RXN_r	4.38092	4	RXN-13813	4.55303	NIL	RXN-20784	4.30121	2	RXN-11191_f	3.89	2	RXN-15295	7.4358	1	3.4.17.13-RXN	6.09078	3	RXN-11469
	RXN-9891	4.57226	1	RXN-9891	4.57226	1	OMEGA-HYDROXYDECANOATE-DEHYDROGENASE-RXN_f	8.29381	1	RXN-10899	7.23322	NIL	1.1.1.176-RXN_r	6.65447	1	RXN-18229	3.83364	3	SUCCINYLDIAMINOPIMTRANS-RXN	3.60821	2	RXN-21110	4.30534	NIL	RXN-14605	4.31679	3	N-ACETYLNEURAMINATE-SYNTHASE-RXN	4.37918	2	RXN-16966	4.38562	1	RXN-15332	4.55526	NIL	GLYOHMETRANS-RXN_f	4.30231	2	RXN-11191_r	3.89	2	RXN-11112	7.43627	3	RXN-9356_f	6.09464	2	RXN-9048
	RXN-8053	4.57608	1	RXN-8053	4.57608	1	OMEGA-HYDROXYDECANOATE-DEHYDROGENASE-RXN_r	8.29381	1	RXN-10900	7.23322	NIL	RXN-16020	6.65868	1	RXN-14334	3.83471	NIL	AICARTRANSFORM-RXN_f	3.60971	2	2.4.1.142-RXN	4.30836	2	RXN-8475	4.31682	2	RXN-12718	4.38031	3	3.4.17.11-RXN	4.38588	3	RXN-13821	4.5555	NIL	GLYOHMETRANS-RXN_r	4.30231	2	RXN-12722	3.89008	4	RXN-14724_f	7.43927	2	RXN-9356_r	6.09464	2	RXN-17435
	RXN-17340	4.58126	1	RXN-17340	4.58126	1	RXN66-353_f	8.30809	1	RXN-10898	7.23322	NIL	RXN-12264_f	6.67346	1	RXN-17517	3.83526	1	AICARTRANSFORM-RXN_r	3.60971	2	RXNARA-8002	4.30875	NIL	RXN-13034	4.31807	4	RXN-18235	4.38037	2	RXN-13177	4.38616	3	RXN-18058	4.55642	NIL	RXN-7929_f	4.30357	4	RXN-19306	3.89193	2	RXN-14724_r	7.43927	2	RXN-17785	6.09731	4	TEICHOICSYN5-RXN
	RXN-11493	4.58332	NIL	RXN-11493	4.58332	NIL	RXN66-353_r	8.30809	1	RXN-10901	7.23322	NIL	RXN-12264_r	6.67346	1	RXN-16246	3.83679	2	RXN-8016	3.61183	3	RXN-19686	4.30916	NIL	RXN-8798	4.31864	NIL	RXN-18261	4.38069	2	12-ALPHA-L-FUCOSIDASE-RXN	4.38789	3	RXN-12029	4.55846	2	RXN-7929_r	4.30357	4	RXN-18563	3.89411	4	OAHTHAUERA-RXN_f	7.44623	3	METHELENE-THMPT-OXI-RXN_f	6.11513	1	RXN-12327
	RXN-14472	4.58638	NIL	RXN-14472	4.58638	NIL	RXN-13468	8.31094	1	RXN-11928	7.2389	1	1.1.1.209-RXN	6.67346	1	3.5.2.17-RXN	3.83685	3	RXN-11761	3.6127	3	RXN-17809	4.3109	4	RXN-15376_f	4.31933	2	RXN-8205	4.38357	NIL	RXN18HP-6	4.38878	NIL	RXN3DJ-11230	4.56062	NIL	RXN-19875	4.30502	NIL	RXN0-7141	3.89836	NIL	OAHTHAUERA-RXN_r	7.44623	3	METHELENE-THMPT-OXI-RXN_r	6.11513	1	RXN-14560
	RXN-10855	4.58978	NIL	RXN-10855	4.58978	NIL	CYCLOHEXADIENYL-DEHYDROGENASE-RXN	8.32913	1	RXN-20373	7.2389	1	RXN66-567_f	6.67346	1	RXN-14856	3.83691	NIL	RXN8J2-2	3.61364	NIL	RXN-13185	4.31393	1	RXN-15376_r	4.31933	2	RXN-8471	4.38678	2	IGPSYN-RXN	4.38901	4	RXN-21094	4.56115	NIL	RXN-4305	4.30528	2	RXN-20581	3.89936	1	RXN-18379_f	7.45095	2	RXN-18379_f	6.12562	2	RXN-17998
	RXN-17403_f	4.59112	1	RXN-17403_f	4.59112	1	RXN-15465	8.34398	NIL	RXN-11959	7.2389	1	RXN66-567_r	6.67346	1	RXN0-7325	3.83887	NIL	RXN-17435	3.61374	4	HEMN-RXN	4.31467	1	1.14.20.1-RXN	4.32211	1	RXN-17701	4.38818	3	N-SULFOGLUCOSAMINE-SULFOHYDROLASE-RXN	4.39148	3	RXN1G-186	4.56146	3	RXN-7866	4.30637	1	RXN-12234_f	3.89993	NIL	RXN-18379_r	7.45095	2	RXN-18379_r	6.12562	2	GSPAMID-RXN_f
	RXN-17403_r	4.59112	1	RXN-17403_r	4.59112	1	RXN-5682	8.35743	1	RXN-20374	7.2389	1	RXN-9841	6.67346	1	RXNQT-4322	3.83895	4	RXN-9778_f	3.61497	2	RXN-11192	4.31668	3	CYCLOEUCALENOL-CYCLOISOMERASE-RXN	4.32402	5	RXN-4221	4.38932	NIL	RXN-12753	4.39613	NIL	RXN-10053	4.56207	2	RXN-7855	4.30637	1	RXN-12234_r	3.89993	NIL	RXN-9356_f	7.47477	2	RXN-19895_f	6.12763	2	GSPAMID-RXN_r
	RXN-16033	4.59464	1	RXN-16033	4.59464	1	OXOGLUTARATE-DEHYDROGENASE-NADP+-RXN_f	8.3631	1	RXN-20441	7.2389	1	RXN-13688_f	6.67346	1	RXN-18397	3.83934	3	RXN-9778_r	3.61497	2	PYRIMSYN1-RXN	4.31679	4	GLYOXI-RXN_f	4.32463	4	RXN-12366	4.39078	2	RXN-12754	4.39613	NIL	TAGAALDOL-RXN	4.56392	4	RXN-13610	4.3067	3	RXN-19178	3.9003	5	RXN-9356_r	7.47477	2	RXN-19895_r	6.12763	2	RXN-16709
	RXN-12926	4.59604	1	RXN-12926	4.59604	1	OXOGLUTARATE-DEHYDROGENASE-NADP+-RXN_r	8.3631	1	RXN-11938	7.2389	1	RXN-13688_r	6.67346	1	R123-RXN	3.84023	3	RXN-8136	3.61646	NIL	RXN-13316	4.31699	NIL	GLYOXI-RXN_r	4.32463	4	RXN-9989	4.3908	3	HEMN-RXN	4.39655	1	F16ALDOLASE-RXN_f	4.56392	4	RXN-15758	4.30723	NIL	4-NITROPHENYLPHOSPHATASE-RXN	3.90045	3	RXN-20979	7.4758	NIL	RXN-19315	6.13961	3	RXN-16710
	SUCCGLUALDDEHYD-RXN	4.601	1	SUCCGLUALDDEHYD-RXN	4.601	1	RXN-9819	8.37778	NIL	RXN-11933	7.2389	1	RXN-15819	6.67493	1	RXN-16494	3.84045	NIL	RXN-8137	3.61646	NIL	RXN-13314	4.31699	NIL	RXN-12230	4.32889	2	RXN-15497	4.3918	NIL	RXN-17514_f	4.39788	4	F16ALDOLASE-RXN_r	4.56392	4	RXN-15264	4.30905	2	RXN-10109_f	3.90055	5	RXN-20371	7.4948	2	RXN-15132	6.14978	2	HYDROXYMETHYLGLUTARYL-COA-LYASE-RXN
	1.1.1.266-RXN	4.61557	1	1.1.1.266-RXN	4.61557	1	RXN-3341	8.39068	1	RXN-18712	7.24409	NIL	RXN-17111	6.67539	1	SAMDECARB-RXN	3.84547	4	RXN0-5122	3.61944	NIL	CEPHALOSPORIN-C-DEACETYLASE-RXN	4.31905	3	H2NEOPTERINP3PYROPHOSPHOHYDRO-RXN	4.33082	3	2.4.1.67-RXN_f	4.39248	2	RXN-17514_r	4.39788	4	P-PANTOCYSDECARB-RXN	4.5654	4	RXN-14616	4.31249	3	RXN-10109_r	3.90055	5	RXN-15362	7.49483	3	RXN-14724_f	6.15421	2	RXN-18017
	DTDPDEHYRHAMREDUCT-RXN_f	4.61557	1	DTDPDEHYRHAMREDUCT-RXN_f	4.61557	1	RXN-16925	8.40115	NIL	RXN-17535	7.24647	NIL	RXN-13309	6.67539	1	2.5.1.67-RXN	3.84551	2	RXN-15638	3.62182	NIL	FTRMBARK-RXN_f	4.32129	2	RXN-21213	4.33263	NIL	2.4.1.67-RXN_r	4.39248	2	RXN-4222	4.39871	NIL	RXN-18066	4.57034	NIL	RXN-15330	4.31654	NIL	RXN-13627	3.90185	NIL	RXN-12744	7.50419	NIL	RXN-14724_r	6.15421	2	2.3.1.91-RXN
	DTDPDEHYRHAMREDUCT-RXN_r	4.61557	1	DTDPDEHYRHAMREDUCT-RXN_r	4.61557	1	RXN-8891_f	8.40315	1	R321-RXN	7.24973	1	RXN-20343	6.67539	1	RXN-21333	3.84562	NIL	RXN-11903	3.62362	5	FTRMBARK-RXN_r	4.32129	2	RXN-15413	4.33517	NIL	RXN-18251	4.39726	2	RXN-14092	4.40019	3	RXN-12384	4.57412	3	RXN-8798	4.31672	NIL	RXN-16948	3.90217	3	RXN-18566	7.50653	2	RXN-1124_f	6.15594	NIL	RXN-9457
	RXN-13414	4.63374	NIL	RXN-13414	4.63374	NIL	RXN-8891_r	8.40315	1	ALBENDAZOLE-MONOOXYGENASE-RXN	7.2526	1	RXN-20339	6.67539	1	R607-RXN	3.8463	NIL	CHOLINE-SULFATASE-RXN	3.62368	3	RXN-14782	4.32186	NIL	RXN-13424	4.33534	NIL	RXN-19177	4.39836	NIL	RXN-13207	4.40106	NIL	RXN-8255	4.57519	NIL	RXN-17785	4.3182	4	RXN-1981	3.90338	4	RXN-19172	7.51873	NIL	RXN-1124_r	6.15594	NIL	RXN-19897_f
	RXN-17006	4.63418	NIL	RXN-17006	4.63418	NIL	1.14.13.101-RXN	8.41245	1	1.1.1.222-RXN	7.26267	1	ACYL-COA-DEHYDROGENASE-NADP+-RXN	6.67539	1	RXN-12896	3.84749	NIL	RXN-17617	3.62402	3	RXN-18073	4.3233	NIL	RXN-14355	4.33673	NIL	GLYOXII-RXN	4.39836	3	RXN-886	4.40139	NIL	TREHALA-RXN	4.57588	3	RXN-12610	4.32177	2	RXN-12393	3.90358	1	RXN-21006	7.53228	4	RXN-14576	6.156	1	RXN-19897_r
	RXN-14769	4.63659	NIL	RXN-14769	4.63659	NIL	RXN-2221	8.4147	1	RXN-18717	7.26388	NIL	RXN-20347	6.67539	1	RXN-12357	3.84756	3	RXN0-5121	3.62563	NIL	PRAISOM-RXN	4.32351	5	RXN-12407_f	4.33899	2	RXN-16902	4.39923	NIL	RXN-10969	4.40233	NIL	RXN-17514_f	4.57744	4	RXN-14546	4.32342	2	RXN-19285	3.90382	1	METHELENE-THMPT-OXI-RXN_f	7.54134	1	RXNI-2_f	6.15781	2	RXN-15295
	RXN-15785	4.65429	NIL	RXN-15785	4.65429	NIL	RXN-15466	8.42506	NIL	1.5.1.34-RXN	7.27883	1	RXNQT-4178	6.68273	1	RXN-11649	3.84892	NIL	RXN-18397	3.62591	3	RXN-8810	4.32377	2	RXN-12407_r	4.33899	2	2.4.1.213-RXN	4.40091	2	RXN-18420	4.40454	NIL	RXN-17514_r	4.57744	4	3-CH3-2-OXOBUTANOATE-OH-CH3-XFER-RXN_f	4.32397	2	RXN-20788	3.90676	3	METHELENE-THMPT-OXI-RXN_r	7.54134	1	RXNI-2_r	6.15781	2	RXN-18857
	DIHYDROURACIL-DEHYDROGENASE-NAD+-RXN_f	4.66735	1	DIHYDROURACIL-DEHYDROGENASE-NAD+-RXN_f	4.66735	1	RXN-15601	8.43098	NIL	D-PINITOL-DEHYDROGENASE-RXN_f	7.2876	1	RXN-14880	6.68335	NIL	RXN-16483	3.85022	3	RXN0-2382	3.62648	4	6.3.1.10-RXN	4.32532	6	RXN-15703	4.33938	3	6.3.1.10-RXN	4.40145	6	RXN-8799	4.40658	NIL	RXN-12675_f	4.57745	5	3-CH3-2-OXOBUTANOATE-OH-CH3-XFER-RXN_r	4.32397	2	3.4.23.38-RXN	3.90757	3	RXN0-6510_f	7.54356	5	RXN-19798	6.17357	NIL	RXN-18294
	DIHYDROURACIL-DEHYDROGENASE-NAD+-RXN_r	4.66735	1	DIHYDROURACIL-DEHYDROGENASE-NAD+-RXN_r	4.66735	1	2OXOGLUTARATEDEH-RXN	8.43413	NIL	D-PINITOL-DEHYDROGENASE-RXN_r	7.2876	1	RXN-16653	6.68689	1	RXN-9978	3.85135	1	RXN-17589	3.62731	3	RXN-13403	4.32594	2	RXN-17401	4.3396	4	RXN0-7343	4.4022	NIL	RXN-11751_f	4.40672	3	RXN-12675_r	4.57745	5	GANGLIOSIDE-GALACTOSYLTRANSFERASE-RXN	4.32434	2	3.4.23.39-RXN	3.90757	3	RXN0-6510_r	7.54356	5	RXN-14291	6.17673	NIL	1.8.5.1-RXN
	D-LYSOPINE-DEHYDROGENASE-RXN	4.67121	1	D-LYSOPINE-DEHYDROGENASE-RXN	4.67121	1	PCP4MONO-RXN	8.43486	1	RXN1UA-50	7.30654	1	RXN-9885	6.68865	1	4.1.2.34-RXN_f	3.85305	4	RXN-11302	3.62906	3	RXN-19306	4.32662	2	RXN-17388	4.34118	3	RXN-11806	4.4046	NIL	RXN-11751_r	4.40672	3	CEPHALOSPORIN-C-DEACETYLASE-RXN	4.58091	3	RXN-16474	4.32532	3	RXN-12330	3.90809	5	METHYL-COM-HTP-RXN_f	7.54487	2	RXN0-5393	6.17864	4	RXN-19875
	RXN-16800	4.68294	1	RXN-16800	4.68294	1	RXN-15015	8.43859	NIL	RXN-13191	7.30792	1	RXN-5921	6.70185	1	4.1.2.34-RXN_r	3.85305	4	RXN-1404	3.62979	3	RXN-8761	4.32756	NIL	RXN1F-93	4.34262	1	RXN18HP-6	4.40492	NIL	RXN-14005	4.41045	NIL	RXN-13596_f	4.58191	2	COBINAMIDEKIN-RXN	4.32906	2	RXN-20763	3.90814	3	METHYL-COM-HTP-RXN_r	7.54487	2	RXN-20230	6.17894	2	RXN-15013_f
	RXN-18853	4.71331	1	RXN-18853	4.71331	1	1.3.1.49-RXN_f	8.4739	1	1.2.1.45-RXN	7.30895	1	7-ALPHA-HYDROXYSTEROID-DEH-RXN	6.70736	1	1.13.11.9-RXN	3.85315	1	RXN-14113	3.63169	3	SEDOBISALDOL-RXN_f	4.33566	4	RXN-11744	4.34436	NIL	RXN-8284	4.40529	NIL	RXN-21122	4.41133	NIL	RXN-13596_r	4.58191	2	RXN-17645_f	4.32916	5	RXN-10048	3.91334	3	RXN-9627	7.55202	3	RXN-14804_f	6.17915	5	RXN-15013_r
	RXN-8955	4.71669	1	RXN-8955	4.71669	1	1.3.1.49-RXN_r	8.4739	1	ERYTHRON4PDEHYDROG-RXN	7.33084	1	RXN-16949	6.70738	1	RXN-20734	3.85615	3	TRIMETHYLAMINE-OXIDE-ALDOLASE-RXN	3.63316	4	SEDOBISALDOL-RXN_r	4.33566	4	RXN-16746	4.34707	1	RXN-16709	4.40572	NIL	TANNASE-RXN	4.41326	3	RXN-13176	4.58251	2	RXN-17645_r	4.32916	5	RXN-9028_f	3.91409	2	RXN-20645	7.55241	2	RXN-14804_r	6.17915	5	RXN-9231
	RXN-9912	4.71682	1	RXN-9912	4.71682	1	BUTANAL-DEHYDROGENASE-RXN_f	8.49571	1	RXN-5041	7.33508	NIL	RXN-5284	6.71351	NIL	RXN-10465	3.85657	1	RXN-10767	3.63549	3	RXN-18294	4.3374	2	SINAPINE-ESTERASE-RXN	4.34883	3	RXN-16710	4.40572	NIL	2.1.3.7-RXN	4.41348	2	BTUR2-RXN	4.58256	2	H2PTEROATESYNTH-RXN	4.32963	2	RXN-9028_r	3.91409	2	RXN-11435	7.56074	3	1.8.98.1-RXN	6.18065	1	RXN-18274
	RXN-16802	4.73715	1	RXN-16802	4.73715	1	BUTANAL-DEHYDROGENASE-RXN_r	8.49571	1	RXN-10032	7.34696	1	RXN-11970_f	6.71963	1	ISOCHORMAT-RXN	3.85736	3	RXNQT-4366	3.63794	3	S-ADENOSYLHOMOCYSTEINE-DEAMINASE-RXN	4.34072	3	RXN-7305	4.35437	3	RXN-13813	4.40584	NIL	6-BETA-HYDROXYHYOSCYAMINE-EPOXIDASE-RXN	4.41414	1	RXN-17286	4.58523	NIL	RXN-15331	4.33339	NIL	RXN-19300	3.91485	2	RXNI-2_f	7.5844	2	RXN-15375	6.19433	NIL	RXN-11191_f
	RXN-8821	4.73891	1	RXN-8821	4.73891	1	RXN-16884	8.51025	NIL	RXN-12264_f	7.34711	1	RXN-11970_r	6.71963	1	RXN-18638_f	3.8587	2	RXN0-7143	3.64344	NIL	RXN-15962	4.34207	NIL	RXN-8474	4.35604	2	RXN18C3-14	4.40606	3	TAGAALDOL-RXN	4.41507	4	RXN-18481	4.58593	3	RXN-12718	4.33385	3	RXN-10711	3.91611	3	RXNI-2_r	7.5844	2	RXN-21171	6.2007	NIL	RXN-11191_r
	RXN-13660	4.74506	NIL	RXN-13660	4.74506	NIL	RXN-20193	8.57017	1	RXN-12264_r	7.34711	1	MHPHYDROXY-RXN	6.72375	1	RXN-18638_r	3.8587	2	RXN-10843	3.64379	1	RXN-16086	4.34378	NIL	RXN-10003	4.35865	2	RXN-18060	4.40652	NIL	F16ALDOLASE-RXN_f	4.41507	4	3.1.3.69-RXN	4.5909	3	BAI3OXO-OXRED-RXN	4.33426	1	HOMOCYSMETB12-RXN	3.91897	2	RXN-12168	7.5851	2	ISOHEXENYLGLUTACONYL-COA-HYDRATASE-RXN	6.21185	4	RXN0-7022
	RXN-17231	4.74779	NIL	RXN-17231	4.74779	NIL	MANNPDEHYDROG-RXN_f	8.57138	1	1.1.1.209-RXN	7.34711	1	1.3.1.29-RXN	6.73283	1	RXN-12895	3.85962	3	TETRAACYLDISACC4KIN-RXN	3.64542	2	RXN-15966	4.34467	NIL	RXN-17083	4.35865	NIL	RXN-19129	4.41143	1	F16ALDOLASE-RXN_r	4.41507	4	RXN-14562	4.59138	2	RXN-21004	4.33536	4	HOMOCYSMET-RXN	3.91897	2	RXN-8087	7.58977	6	RXN-8087	6.22203	6	RXN-11075
	RXN-10079	4.74964	1	RXN-10079	4.74964	1	MANNPDEHYDROG-RXN_r	8.57138	1	RXN66-567_f	7.34711	1	TAUROPINE-DEHYDROGENASE-RXN	6.73602	1	RXN-10785	3.86099	4	CHOLINE-OXIDASE-RXN	3.64723	NIL	UDP-NACMURALA-GLU-LIG-RXN	4.34856	6	BA7DEHYDRA-RXN	4.36248	4	RXN1F-475	4.41314	NIL	RXN-19166	4.41517	2	RXN-18996	4.59481	2	RXN-10003	4.33652	2	RXN-7892	3.91897	NIL	ISOBUTYRYL-COA-MUTASE-RXN_f	7.58983	5	RXN-15134	6.23705	2	RXN-20142
	RXN-1125	4.755	1	RXN-1125	4.755	1	RXN-13402	8.58991	1	RXN66-567_r	7.34711	1	RXN-15051_f	6.76728	1	RXN-17583	3.86206	4	RXN-8747	3.65026	NIL	RXN-8480	4.34973	NIL	RXN-4161_f	4.36315	5	DOLICHYLDIPHOSPHATASE-RXN_f	4.41325	3	1.14.20.1-RXN	4.41973	1	RXN0-7343	4.59701	NIL	RXN-17083	4.33652	NIL	RXN0-3921	3.91962	NIL	ISOBUTYRYL-COA-MUTASE-RXN_r	7.58983	5	RXN-20221	6.23705	2	RXN-11351
	RXN-10078	4.75745	1	RXN-10078	4.75745	1	RXN-9952	8.59116	1	RXN-9841	7.34711	1	RXN-15051_r	6.76728	1	RXN-12718	3.86248	3	LINB1-RXN	3.65126	3	RXN-12029	4.35012	2	RXN-4161_r	4.36315	5	DOLICHYLDIPHOSPHATASE-RXN_r	4.41325	3	RXN8J2-2	4.42108	NIL	RXN-18070	4.59811	NIL	RXN-16011	4.33967	NIL	RXN-19584	3.91963	NIL	RXN-19170	7.59522	NIL	RXN-21004	6.24415	4	1.14.13.98-RXN
	RXN-9914	4.76368	1	RXN-9914	4.76368	1	RXN-12085_f	8.59507	NIL	RXN-13688_f	7.34711	1	1.14.12.18-RXN	6.77777	1	RXN-16813	3.86308	NIL	RXN-6421	3.65488	1	RXN-13908	4.3522	4	RXN-9579_f	4.36455	NIL	RXN-13208	4.41349	NIL	RXN-12816	4.42143	3	RXN-18217	4.59833	3	RXN-19581	4.34047	3	RXN-12812_f	3.92047	2	RXN-14291	7.6136	NIL	RXN-13337	6.24488	4	RXN-12842
	ACETOLACTREDUCTOISOM-RXN	4.76455	1	ACETOLACTREDUCTOISOM-RXN	4.76455	1	RXN-12085_r	8.59507	NIL	RXN-13688_r	7.34711	1	1.1.1.53-RXN	6.78404	1	RXN-21078	3.8635	4	DIMETHYLPROPIOTHETIN-DETHIOMETHYLASE-RXN	3.65908	4	RXN-12152	4.35246	NIL	RXN-9579_r	4.36455	NIL	RXN-15791	4.41452	NIL	3.2.1.156-RXN	4.42271	3	RXN-18218	4.59833	3	RXN0-7341	4.346	NIL	RXN-12812_r	3.92047	2	RXN-9995	7.62375	2	3-OXOACID-COA-TRANSFERASE-RXN_f	6.25236	2	RXN-14063
	R606-RXN	4.76839	NIL	R606-RXN	4.76839	NIL	RXN-9480_f	8.62022	1	RXN-18716	7.39088	NIL	RXN66-570	6.78404	NIL	RXN-20788	3.86409	3	RXN-18913	3.65979	3	2.4.1.153-RXN	4.35301	2	RXN-16966	4.3655	1	RXN0-7192	4.41488	6	6PGLUCONOLACT-RXN	4.42359	3	RXN-11182	4.59833	3	6.3.1.10-RXN	4.34723	6	2.3.1.98-RXN	3.92114	2	RXN-15375	7.62906	NIL	3-OXOACID-COA-TRANSFERASE-RXN_r	6.25236	2	LUMAZINESYN-RXN
	RXN0-4022	4.78295	1	RXN0-4022	4.78295	1	RXN-9480_r	8.62022	1	RXN-13564	7.39367	NIL	1.1.1.145-RXN_f	6.78404	1	1.4.3.20-RXN	3.86581	1	3.5.1.80-RXN	3.66725	3	RXN-16569	4.35301	2	RXN-17442	4.36864	NIL	RXN-8473	4.41536	2	RXN-14900	4.42377	3	RXN-8134	4.59833	3	RXN-8764	4.35652	2	RXN66-496	3.922	3	3-OXOACID-COA-TRANSFERASE-RXN_f	7.63116	2	3-OXOADIPATE-COA-TRANSFERASE-RXN	6.25236	2	RXN-16011
	RXN-8941	4.79213	NIL	RXN-8941	4.79213	NIL	RXN-15467	8.63886	NIL	RXN-11565	7.39657	1	1.1.1.145-RXN_r	6.78404	1	RXN-8119	3.86631	2	NAG6PDEACET-RXN	3.66725	3	RXN-8768	4.35352	5	RXN-15820	4.36882	NIL	RXN-15959	4.41749	NIL	RXN-20645	4.42556	2	RXN-18227	4.59833	3	RXN-8469	4.35806	1	RXN-10643	3.92215	4	3-OXOACID-COA-TRANSFERASE-RXN_r	7.63116	2	RXN-14777_f	6.26687	5	RXN-11072
	RXN-16304	4.7971	NIL	RXN-16304	4.7971	NIL	RXN-13344	8.65779	1	RXN-18384	7.40352	1	RXN-11394	6.78721	NIL	RXN-20716	3.86839	2	RXN-19584	3.66893	NIL	1.8.98.1-RXN	4.35886	1	RXN-14980	4.37226	3	RXN-19013	4.41853	5	3.1.1.54-RXN	4.42699	3	RXN-18216	4.59833	3	RXN-11789	4.35818	2	RXN-7973	3.92325	1	3-OXOADIPATE-COA-TRANSFERASE-RXN	7.63116	2	RXN-14777_r	6.26687	5	RXN-16472_f
	RXN-8162	4.80196	NIL	RXN-8162	4.80196	NIL	RXN-16513	8.6661	NIL	RXN-11407	7.40435	1	RXN-14280	6.78828	1	RXN-12723	3.87051	4	RXN-19294_f	3.67071	5	RXN-13104	4.35898	NIL	RXN-18818	4.3724	NIL	N-ACYLNEURAMINATE-9-PHOSPHATASE-RXN	4.41858	3	RXN-12768_f	4.42746	2	RXN-18219	4.59833	3	RXN-7974	4.35938	1	RXN-18004	3.9257	NIL	RXN-19895_f	7.63198	2	RXN-19172	6.27922	NIL	RXN-16472_r
	RXN-17096	4.81845	1	RXN-17096	4.81845	1	1.1.1.247-RXN_f	8.67221	1	URONATE-DEHYDROGENASE-RXN	7.40435	1	FLAVONADPREDUCT-RXN_f	6.79629	1	3.5.2.12-RXN	3.87084	3	RXN-19294_r	3.67071	5	RXN-10904	4.36289	NIL	RXN-17754	4.37402	NIL	RXN-18058	4.41882	NIL	RXN-12768_r	4.42746	2	RXN-9310	4.6032	4	RXN-21005	4.35991	4	RXN-15233_f	3.9257	NIL	RXN-19895_r	7.63198	2	RXN-14794	6.2888	4	RXN-8958
	RXN-15034	4.81865	NIL	RXN-15034	4.81865	NIL	1.1.1.247-RXN_r	8.67221	1	4-SULFOBENZOATE-34-DIOXYGENASE-RXN	7.40493	1	FLAVONADPREDUCT-RXN_r	6.79629	1	RXN-14948	3.87181	5	RXN-15141	3.67251	NIL	RXN-19170	4.36393	NIL	RXN-5467	4.37622	2	RXN-14420	4.41959	2	RXN-16474	4.42755	3	RXN-4221	4.60321	NIL	RXN-12152	4.36005	NIL	RXN-15233_r	3.9257	NIL	RXN-21073	7.6393	NIL	RXN-20383	6.29489	2	CYCLOEUCALENOL-CYCLOISOMERASE-RXN
	LEUCINE-DEHYDROGENASE-RXN	4.82257	1	LEUCINE-DEHYDROGENASE-RXN	4.82257	1	R201-RXN	8.68223	NIL	RXN-16950	7.41412	1	RXN-12444	6.79629	1	RXN1F-148	3.87225	5	N-SULFOGLUCOSAMINE-SULFOHYDROLASE-RXN	3.67319	3	RXN0-4641_f	4.36461	4	RXN-5466	4.37622	2	DAPASYN-RXN_f	4.42033	2	RXN-13403	4.42862	2	RXN-11789	4.60353	2	BADEL4OXRED-RXN_f	4.36253	1	ACYLCARNITINE-HYDROLASE-RXN	3.9263	3	RXN-20230	7.64424	2	2.1.3.1-RXN_f	6.30222	2	RXN-18060
	RXN-16667	4.82882	NIL	RXN-16667	4.82882	NIL	1.3.1.60-RXN_f	8.70672	1	RXN-13158	7.41544	1	RXN0-7021	6.79674	NIL	RXN0-6460	3.87328	NIL	RXN-12001	3.67624	NIL	RXN0-4641_r	4.36461	4	RXN-19572	4.37651	3	DAPASYN-RXN_r	4.42033	2	LACTOYL-COA-DEHYDRATASE-RXN	4.42919	4	RXN-15326	4.60484	2	BADEL4OXRED-RXN_r	4.36253	1	RXN-11067	3.92708	1	RXN-20379	7.64505	2	2.1.3.1-RXN_r	6.30222	2	RXN-1321
	RXN-18411	4.83392	1	RXN-18411	4.83392	1	1.3.1.60-RXN_r	8.70672	1	CHLOROMALERED-RXN	7.43521	1	PHTHALATE-45-DIOXYGENASE-RXN	6.80219	1	1.97.1.2-RXN	3.87535	1	R465-RXN	3.6779	NIL	RXN-16456	4.36585	2	12-ALPHA-L-FUCOSIDASE-RXN	4.37759	3	RXN-19154	4.42242	NIL	RXN-19014	4.43238	5	RXN-13974	4.60484	2	RXN-17400	4.36272	1	RXN-18228	3.92709	NIL	PROPIONATE-COA-TRANSFERASE-RXN_f	7.66771	2	RXN-15362	6.3191	3	RXN-9497
	RXN-16164	4.84215	NIL	RXN-16164	4.84215	NIL	NAPHTHALENE-12-DIOXYGENASE-RXN	8.71109	1	HYDROXYPHENYLPYRUVATE-REDUCTASE-RXN	7.45247	1	RXN-15253	6.80854	1	RXN-15056	3.87592	4	3.1.1.47-RXN	3.67833	3	RXN-21295	4.36585	2	RXN-14092	4.38178	3	2.4.1.150-RXN	4.42328	2	FADSYN-RXN_f	4.43988	2	RXN-20557	4.60779	3	RXN-17416	4.36272	1	RXN-18763	3.928	3	PROPIONATE-COA-TRANSFERASE-RXN_r	7.66771	2	RXN-19170	6.32331	NIL	RXN-8073
	RXN-11794	4.84306	NIL	RXN-11794	4.84306	NIL	RXN-14824	8.71934	1	RXN-15637	7.46956	NIL	RXN-15254	6.80854	1	RXN-16270	3.87831	1	4.99.1.5-RXN	3.67877	4	RXN-9488	4.36843	3	RXN-18149	4.38385	NIL	RXN-12812_f	4.42335	2	FADSYN-RXN_r	4.43988	2	KDO-8PPHOSPHAT-RXN	4.60875	3	2.3.1.98-RXN	4.3647	2	RXN-12646	3.92806	NIL	RXN-12529	7.66975	NIL	RXN-20375	6.34287	2	RXN-864_f
	LINC-RXN_f	4.8486	NIL	LINC-RXN_f	4.8486	NIL	RXN-13478	8.72321	1	1.1.1.53-RXN	7.47152	1	RXN-15255	6.80854	1	RXN-20436	3.87972	5	RXN-7885	3.67911	NIL	RXN-10620	4.37449	1	RXN0-6575	4.3872	4	RXN-12812_r	4.42335	2	RXN-17156	4.4425	NIL	RXN-12610	4.61084	2	RXN-13252	4.36511	4	ACNEULY-RXN_f	3.92927	4	RXNMETA-12671	7.68093	3	RXN-12744	6.34744	NIL	RXN-864_r
	LINC-RXN_r	4.8486	NIL	LINC-RXN_r	4.8486	NIL	PREPHENATEDEHYDROG-RXN	8.72546	1	RXN66-570	7.47152	NIL	1.8.1.5-RXN	6.8099	1	RXN-14267	3.8803	3	DHLAXANAU-RXN	3.68232	3	RXN-19129	4.37715	1	RXN-8797	4.38885	NIL	RXN-11075	4.42342	NIL	RXN0-304	4.44354	NIL	RXN-18263	4.61275	2	METHYLACYLYLCOA-HYDROXY-RXN_f	4.36586	4	ACNEULY-RXN_r	3.92927	4	RXN-15132	7.68952	2	RXN-8965	6.35569	4	RXN-8500
	RXN-16755	4.85358	NIL	RXN-16755	4.85358	NIL	MORPHINE-6-DEHYDROGENASE-RXN_f	8.73368	1	1.1.1.145-RXN_f	7.47152	1	RXN-9069	6.81464	NIL	RXN-8836	3.88052	1	RXN-13088	3.68391	1	RXN-14407	4.37939	1	RXN-7947	4.38991	5	RXN-19172	4.4236	NIL	RXN-11142	4.44537	3	RXN-12236	4.61388	NIL	METHYLACYLYLCOA-HYDROXY-RXN_r	4.36586	4	RXN-15313	3.92927	4	RXN-12745	7.69084	NIL	METHYLMALONYL-COA-DECARBOXYLASE-RXN	6.35987	4	RXN-8961_f
	RXN-11081	4.85371	1	RXN-11081	4.85371	1	MORPHINE-6-DEHYDROGENASE-RXN_r	8.73368	1	1.1.1.145-RXN_r	7.47152	1	RXN-15033_f	6.81593	NIL	3.1.3.74-RXN	3.88083	3	RXN1F-148	3.68708	5	RXN-11459	4.38028	NIL	L-GLN-FRUCT-6-P-AMINOTRANS-RXN_f	4.39059	2	RXN-15413	4.42846	NIL	RXN-21220	4.44634	3	CELLOBIOSE-PHOSPHORYLASE-RXN_f	4.61872	2	RXN-13675	4.36706	3	RXN-10665	3.92943	4	4-ACETAMIDOBUTYRYL-COA-DEACETYLASE-RXN	7.69424	3	RXN0-310	6.35987	NIL	RXN-8961_r
	RXN-8831	4.85634	1	RXN-8831	4.85634	1	PREPHENATE-DEHYDROGENASE-NADP+-RXN	8.73708	1	1.6.4.9-RXN	7.48609	1	RXN-15033_r	6.81593	NIL	RXN-5821	3.88623	1	LINB2-RXN	3.68755	3	RXN-9051	4.38045	1	L-GLN-FRUCT-6-P-AMINOTRANS-RXN_r	4.39059	2	RXN-20785	4.4288	2	3.4.22.40-RXN	4.44634	3	CELLOBIOSE-PHOSPHORYLASE-RXN_r	4.61872	2	RXN-8473	4.36964	2	RXN-12021	3.93147	1	TIGLYLCOA-HYDROXY-RXN_f	7.70728	4	RXN-14400	6.37059	2	RXN-8813
	RXN-10891	4.85756	1	RXN-10891	4.85756	1	RXN-17341_f	8.738	1	RXN-10133	7.4876	NIL	RXN-16859	6.8175	NIL	RXN-624	3.88795	3	RXN-15682	3.68963	3	COBINPGUANYLYLTRANS-RXN	4.38065	2	RFFTRANS-RXN_f	4.39065	2	UDP-NACMUR-ALA-LIG-RXN	4.42908	6	RXN-21219	4.44634	3	MALTOSE-PHOSPHORYLASE-RXN_f	4.61872	2	RXN-13696	4.3713	3	RXN-10123_f	3.93156	NIL	TIGLYLCOA-HYDROXY-RXN_r	7.70728	4	RXN-13296	6.37399	2	2.4.1.83-RXN
	RXN-10450	4.87957	1	RXN-10450	4.87957	1	RXN-17341_r	8.738	1	RXN-16801	7.4974	1	RXN-11826_f	6.81753	1	ARGSUCCINLYA-RXN_f	3.88847	4	RXN-14725	3.69133	4	RXN-18252	4.38173	2	RFFTRANS-RXN_r	4.39065	2	RXN-8953_f	4.4317	2	RXN-17809	4.44835	4	MALTOSE-PHOSPHORYLASE-RXN_r	4.61872	2	RXN-20349	4.37247	1	RXN-10123_r	3.93156	NIL	HEMEOSYN-RXN	7.71208	2	METHYLGLUTACONYL-COA-HYDRATASE-RXN_f	6.38232	4	RXN-16602
	RXN6666-5	4.88033	1	RXN6666-5	4.88033	1	RXN-13342	8.74986	1	RXNQT-4178	7.51494	1	RXN-11826_r	6.81753	1	ARGSUCCINLYA-RXN_r	3.88847	4	NN-DIMETHYLFORMAMIDASE-RXN_f	3.69217	3	RXN-12356	4.38211	3	2.6.1.33-RXN_f	4.39065	2	RXN-8953_r	4.4317	2	RXN-11112	4.45312	3	RXN-12977_f	4.61872	2	RXN0-7342	4.37412	NIL	R581-RXN	3.93172	4	RXN-15681	7.72074	NIL	METHYLGLUTACONYL-COA-HYDRATASE-RXN_r	6.38232	4	RXN-20575
	RXN-8787	4.88304	1	RXN-8787	4.88304	1	1.5.1.11-RXN	8.75	1	RXNQT-4192	7.52237	NIL	1.14.13.63-RXN	6.8364	1	RXN-13609_f	3.89362	4	NN-DIMETHYLFORMAMIDASE-RXN_r	3.69217	3	RXN0-7192	4.3828	6	2.6.1.33-RXN_r	4.39065	2	6.3.1.9-RXN	4.4326	6	RXN-14420	4.45408	2	RXN-12977_r	4.61872	2	RXN-10042	4.37523	3	QUERCITRINASE-RXN	3.93215	3	RXN-11663	7.72178	2	RXN-15295	6.39196	1	RXN-21122
	RXN-18331_f	4.88536	NIL	RXN-18331_f	4.88536	NIL	RXN-11194	8.75607	1	RXN-16551	7.52237	1	RXN-12705	6.8425	1	RXN-13609_r	3.89362	4	DICHLOROMETHANE-DEHALOGENASE-RXN	3.69516	4	RXN-17170	4.38519	NIL	RXN0-3542_f	4.39098	NIL	RXN-14361	4.43334	2	RXN-19171	4.45476	NIL	RXN-9459	4.61935	3	RXN-8170	4.37738	NIL	RXN-801	3.93233	4	RXN-13296	7.72602	2	RXN-20645	6.39412	2	RXN-13643
	RXN-18331_r	4.88536	NIL	RXN-18331_r	4.88536	NIL	RXN-14860	8.7611	NIL	RXN-16555	7.52237	1	1.2.1.67-RXN	6.86147	1	RXN-19277	3.89363	NIL	RXN-15980	3.6962	NIL	RXN-12675_f	4.38594	5	RXN0-3542_r	4.39098	NIL	RXN-12263	4.43381	2	RXN-13533	4.45517	NIL	RXN-15276	4.62004	2	RXN-15278	4.37751	2	RXN-11976	3.9357	NIL	RXN-20383	7.72941	2	RXN-20447	6.39839	NIL	3.4.17.14-RXN
	RXN-13084	4.89353	NIL	RXN-13084	4.89353	NIL	RXN-18628	8.78569	2	RXN0-7021	7.53726	NIL	RXN-16860	6.86751	NIL	OHMETHYLBILANESYN-RXN	3.89478	2	RXN-11451_f	3.71039	1	RXN-12675_r	4.38594	5	RXN3O-203	4.39099	NIL	RXN-17754	4.43395	NIL	RXN-15366	4.45558	2	RXN-12611	4.6203	2	RXN-13799	4.37831	NIL	RXN-17690	3.93622	1	RXN-18752_f	7.7354	5	RXN-11435	6.40933	3	2.4.1.79-RXN
	2-HEXADECENAL-REDUCTASE-RXN	4.90042	1	2-HEXADECENAL-REDUCTASE-RXN	4.90042	1	RXN-12568	8.81397	NIL	RXN-16653	7.54121	1	RXN-4282	6.87354	1	RXN-13090	3.8949	NIL	RXN-11451_r	3.71039	1	STERYL-SULFATASE-RXN	4.38703	3	RXN-10896	4.39256	NIL	RXN-18504	4.43565	NIL	RXN-19756	4.45738	NIL	RXN-14005	4.62502	NIL	RXN-21094	4.37875	NIL	3-OXOLAURATE-DECARBOXYLASE-RXN	3.93668	4	RXN-18752_r	7.7354	5	RXN-20979	6.41016	NIL	RXN-15028
	RXN-21359	4.90406	NIL	RXN-21359	4.90406	NIL	RXN-9246	8.81525	1	RXN-14880	7.54132	NIL	GAPDHSYNEC-RXN_f	6.88624	1	RXN-9588	3.89503	NIL	INDOLE-23-DIOXYGENASE-RXN	3.71216	1	RXN-21034	4.38836	NIL	3.1.3.57-RXN	4.39307	3	UDP-NACMURALA-GLU-LIG-RXN	4.43575	6	RFFTRANS-RXN_f	4.45741	2	RXN0-4841_f	4.62573	5	RXN-8434	4.38167	5	RXN0-4641_f	3.93863	4	RXN-19177	7.73643	NIL	RXN-20222	6.4148	2	RXN-13811
	GDP-4-DEHYDRO-D-RHAMNOSE-REDUCTASE-RXN	4.9093	1	GDP-4-DEHYDRO-D-RHAMNOSE-REDUCTASE-RXN	4.9093	1	RXN-17981	8.81879	1	RXN-14466	7.54655	NIL	GAPDHSYNEC-RXN_r	6.88624	1	RXN-13642	3.89639	1	RXN-18337	3.71805	2	RXN-8357	4.38946	3	PPENTOMUT-RXN_f	4.39429	5	RXN-14876_f	4.43584	5	RFFTRANS-RXN_r	4.45741	2	RXN0-4841_r	4.62573	5	RXN-21034	4.38306	NIL	RXN0-4641_r	3.93863	4	RXN-10009	7.73689	2	RXN-12430	6.42624	3	2.4.1.54-RXN_f
	GDP-6-DEOXY-D-TALOSE-4-DEHYDROGENASE-RXN	4.9093	1	GDP-6-DEOXY-D-TALOSE-4-DEHYDROGENASE-RXN	4.9093	1	1.5.1.28-RXN_f	8.82073	1	RXN-11826_f	7.58235	1	R23-RXN	6.90299	NIL	RXN-10741	3.89639	1	RXN-11976	3.71988	NIL	ACYLCARNITINE-HYDROLASE-RXN	4.39064	3	PPENTOMUT-RXN_r	4.39429	5	RXN-14876_r	4.43584	5	2.6.1.33-RXN_f	4.45741	2	RXN-10969	4.62659	NIL	RXN-15329	4.38346	NIL	RXN-20921	3.93945	NIL	RXN-15134	7.73859	2	RXN0-1842	6.43584	2	2.4.1.54-RXN_r
	RXN-18330_f	4.91214	NIL	RXN-18330_f	4.91214	NIL	1.5.1.28-RXN_r	8.82073	1	RXN-11826_r	7.58235	1	RXN-13565	6.90515	NIL	INDOLE-23-DIOXYGENASE-RXN	3.89744	1	GUANIDINOPROPIONASE-RXN_f	3.72002	3	RXN-19172	4.39097	NIL	RXN-12768_f	4.39664	2	RXN-15494	4.43633	NIL	2.6.1.33-RXN_r	4.45741	2	2.4.1.150-RXN	4.62711	2	GDPMANDEHYDRA-RXN	4.38437	4	RXN1F-150	3.9397	5	RXN-20221	7.73859	2	RXN-13294	6.43853	2	RXN-13907
	RXN-18330_r	4.91214	NIL	RXN-18330_r	4.91214	NIL	RXN-17427	8.84789	1	RXN-9885	7.58688	1	RXN-17590	6.9067	1	RXN-698	3.89788	1	GUANIDINOPROPIONASE-RXN_r	3.72002	3	6.3.1.9-RXN	4.39098	6	RXN-12768_r	4.39664	2	RXNQT-4161	4.43717	NIL	RXN-19755	4.45794	NIL	RXN-17442	4.62823	NIL	RXN-14266	4.38717	4	RXN-886	3.941	NIL	RXN-19171	7.73963	NIL	2.5.1.32-RXN	6.43874	NIL	ACETYL-COA-ACETYLTRANSFER-RXN_f
	RXN-21097	4.92584	NIL	RXN-21097	4.92584	NIL	1.1.1.201-RXN_f	8.85267	1	RXN-5921	7.59348	1	R546-RXN	6.92992	1	RXN0-5227	3.89879	3	RXN-20065	3.72568	NIL	2.4.1.141-RXN	4.39404	2	RXN-17438	4.3973	NIL	RXN-7854	4.43865	1	RXN-20436	4.46093	5	H2PTEROATESYNTH-RXN	4.62897	2	RXN-13643	4.38873	1	RXN-10744	3.94206	1	RXN-9664	7.74053	5	RXN-11290	6.44292	3	ACETYL-COA-ACETYLTRANSFER-RXN_r
	RXNMETA-12672	4.93288	1	RXNMETA-12672	4.93288	1	1.1.1.201-RXN_r	8.85267	1	RXN-11970_f	7.60723	1	RXN0-6367	6.9376	1	RXN-9600	3.89885	1	H2PTEROATESYNTH-RXN	3.72763	2	RXN-20544	4.39642	3	3.1.3.62-RXN	4.39963	3	RXN-14263	4.43875	3	RXN-18149	4.46234	NIL	2.5.1.42-RXN	4.62932	2	PYRIMSYN1-RXN	4.39136	4	6-BETA-HYDROXYHYOSCYAMINE-EPOXIDASE-RXN	3.94318	1	RXN-13230_f	7.74461	5	ACETATE--COA-LIGASE-ADP-FORMING-RXN_f	6.45466	6	RXN-18379_f
	FORMYLTETRAHYDROFOLATE-DEHYDROGENASE-RXN_f	4.93382	1	FORMYLTETRAHYDROFOLATE-DEHYDROGENASE-RXN_f	4.93382	1	RXN-16885	8.86068	NIL	RXN-11970_r	7.60723	1	RXN-20709	6.95469	1	RXN-19581	3.89936	3	RXN-17609	3.72941	4	RXN-13521	4.39838	NIL	RXN-10946	4.39963	NIL	TEICHOICSYN5-RXN	4.44051	2	3.1.4.38-RXN	4.46264	3	COBINAMIDEKIN-RXN	4.63221	2	RXN-13821	4.39172	NIL	RXN-14407	3.94357	1	RXN-13230_r	7.74461	5	ACETATE--COA-LIGASE-ADP-FORMING-RXN_r	6.45466	6	RXN-18379_r
	FORMYLTETRAHYDROFOLATE-DEHYDROGENASE-RXN_r	4.93382	1	FORMYLTETRAHYDROFOLATE-DEHYDROGENASE-RXN_r	4.93382	1	2-HYDROXYBIPHENYL-3-MONOOXYGENASE-RXN	8.86211	1	TAUROPINE-DEHYDROGENASE-RXN	7.62199	1	RXN-9510	6.96388	1	RXN-19150	3.89978	5	RXN-16246	3.72974	2	RXN-18772	4.39957	2	RXN-20436	4.4034	5	RXN-19351	4.44086	2	RXN-19188	4.46268	NIL	RXN-8472	4.6347	2	RXN-8813	4.39618	2	RXN-10644	3.94433	5	ITACONYL-COA-HYDRATASE-RXN	7.74688	4	4.3.1.14-RXN	6.46105	4	RXN-15412
	RXN-9875	4.93558	1	RXN-9875	4.93558	1	1.1.1.285-RXN	8.86349	1	RXN-9069	7.62879	NIL	RXN-13081	6.96542	1	RXN-7894	3.89994	NIL	RXN0-6359	3.73061	2	RXN-9048	4.40185	1	3.2.1.149-RXN	4.40357	3	RXN0-5214	4.44095	NIL	RXN-17447	4.46333	NIL	CHORISMATE-SYNTHASE-RXN	4.63523	4	RXN-16709	4.40197	NIL	RXN-19299	3.94589	2	RXN-13337	7.75228	4	RXN-14430	6.46133	1	1.14.13.99-RXN
	GLU6PDEHYDROG-RXN	4.937	1	GLU6PDEHYDROG-RXN	4.937	1	R203-RXN	8.87396	NIL	RXN-20434	7.62976	1	RXN0-4022	6.96788	1	HYDROXYBUTYRATE-DIMER-HYDROLASE-RXN	3.90238	3	RXN-19178	3.7315	5	RXN-17053	4.40552	NIL	RXN-19014	4.40366	5	RXN-18554	4.44117	4	3.1.3.69-RXN	4.464	3	RXN-13516	4.63853	NIL	RXN-16710	4.40197	NIL	GART-RXN_f	3.94657	2	DOLICHYL-PHOSPHATASE-RXN	7.76105	3	RXN-16395	6.46537	3	RXN-12230
	RXN-16583	4.93845	NIL	RXN-16583	4.93845	NIL	PHENYLALANINE-DEHYDROGENASE-RXN	8.87842	1	1.3.1.29-RXN	7.64615	1	RXN-13179	6.97034	1	H2NEOPTERINALDOL-RXN	3.90249	4	R463-RXN_f	3.7321	NIL	RXN-10617	4.40638	2	RXN-19336	4.40373	NIL	GLYOXI-RXN_f	4.44441	4	RXN-13648	4.46457	2	RXN-9999_f	4.63878	2	RXN-20360	4.40479	2	GART-RXN_r	3.94657	2	RXN-11434	7.76177	3	RXN-9626	6.46537	3	RXN-19662
	RXN-7745	4.942	NIL	RXN-7745	4.942	NIL	RXN-14246_f	8.89839	NIL	RXN-16949	7.64873	1	FMNREDUCT-RXN	6.97131	1	RXN-10857	3.90249	4	R463-RXN_r	3.7321	NIL	RXN-15358_f	4.40645	2	2.4.1.213-RXN	4.40394	2	GLYOXI-RXN_r	4.44441	4	RXN-15979	4.46509	NIL	RXN-9999_r	4.63878	2	RXN-10701	4.40511	2	RXN-6685	3.9473	1	RXN-14429	7.77233	3	LINOLEOYL-RXN	6.46537	NIL	RXN-16253
	RXN-19114	4.94912	1	RXN-19114	4.94912	1	RXN-14246_r	8.89839	NIL	RXN-11394	7.64906	NIL	GLUCONATE-5-DEHYDROGENASE-RXN_f	6.97355	1	RXN-3944	3.90321	3	CHOLINESTERASE-RXN	3.73212	3	RXN-15358_r	4.40645	2	RXN-19581	4.40482	3	RXN-15278	4.44452	2	RXN-15502	4.46664	NIL	RXN-15910	4.63977	3	RXN-9916	4.40552	5	RXN-13020_f	3.94866	NIL	RXN-8810	7.77443	2	RXN-13446	6.46537	NIL	RXN-13696
	RXN-5424	4.95387	1	RXN-5424	4.95387	1	RXN-18718	8.90447	NIL	RXN-15253	7.64992	1	GLUCONATE-5-DEHYDROGENASE-RXN_r	6.97355	1	RXN-20575	3.90409	1	RXN-8469	3.73246	1	2.7.7.1-RXN	4.40862	2	DAHPSYN-RXN_f	4.40493	2	RXN-15680	4.44525	2	RXN-8761	4.46724	NIL	AMYLOMALT-RXN_f	4.63977	2	METHYLMALONYL-COA-MUT-RXN_f	4.40632	5	RXN-13020_r	3.94866	NIL	RXN-20222	7.77542	2	RXN-9629	6.46537	3	ACYLCARNITINE-HYDROLASE-RXN
	RXN-11315	4.95558	1	RXN-11315	4.95558	1	2-KETO-ADIPATE-DEHYDROG-RXN	8.90965	NIL	RXN-15254	7.64992	1	RXN-9397	6.97492	1	RXN-12894	3.9054	3	RXN-11454	3.73371	1	TEICHOICSYN2-RXN	4.40886	2	DAHPSYN-RXN_r	4.40493	2	RXN-14616	4.44556	3	RXN-17388	4.4746	3	AMYLOMALT-RXN_r	4.63977	2	METHYLMALONYL-COA-MUT-RXN_r	4.40632	5	RXN-9736	3.95046	2	2.5.1.32-RXN	7.77881	NIL	RXN-21006	6.4886	4	RXN0-6575
	RXN-16162	4.96238	NIL	RXN-16162	4.96238	NIL	RXN-20102	8.93415	1	RXN-15255	7.64992	1	RXN-16803	6.97606	1	RXN-18378	3.9081	4	RXN-19150	3.73584	5	RXN-11351	4.41165	3	RXN-12920	4.40576	NIL	RXN-17160	4.44731	NIL	PANTEPADENYLYLTRAN-RXN	4.47583	2	RXN-10773	4.63977	3	RXN-15427	4.40731	4	RXN0-1461	3.95048	1	2.5.1.42-RXN	7.7799	2	RXN-15681	6.51102	NIL	1.21.3.1-RXN
	RXN-16169_f	4.96238	NIL	RXN-16169_f	4.96238	NIL	1.1.1.170-RXN	8.93415	1	MHPHYDROXY-RXN	7.65785	1	RXN-16087	6.99106	NIL	RXN-10643	3.91099	4	RXN-5470	3.73647	2	1.5.4.1-RXN	4.41176	1	RXN-8635	4.40671	1	2.1.1.86-RXN_f	4.44877	2	RXN-14002	4.47725	3	RXN-18073	4.64095	NIL	RXN-14576	4.40968	1	TRYPTOPHAN-DIMETHYLALLYLTRANSFERASE-RXN	3.95236	2	RXN-1124_f	7.7806	NIL	RXN-12042	6.51316	6	RXN-11257
	RXN-16169_r	4.96238	NIL	RXN-16169_r	4.96238	NIL	RXN-13926	8.93415	1	1.8.1.5-RXN	7.66257	1	RXN-9796	7.02078	1	RXN-13868	3.91506	1	RXN-8038	3.74431	5	2.4.2.12-RXN	4.41236	2	RXN-19166	4.40937	2	2.1.1.86-RXN_r	4.44877	2	RXN-17998	4.47774	NIL	RXN-18264	4.64434	2	RXN-12758_f	4.4101	5	4.1.2.34-RXN_f	3.95395	4	RXN-1124_r	7.7806	NIL	RXN-17177	6.51644	2	R268-RXN
	MALEYLACETATE-REDUCTASE-RXN	4.96697	1	MALEYLACETATE-REDUCTASE-RXN	4.96697	1	RXN66-23	8.93415	1	RXN-15051_f	7.66799	1	RXN-663	7.02092	1	RXN-12722	3.9157	4	DHLBXANAU-RXN	3.74489	3	NICONUCADENYLYLTRAN-RXN	4.41262	2	RXN-19335	4.41184	2	RXN0-3542_f	4.45371	NIL	RXN-18504	4.48381	NIL	RXN-20580	4.64877	1	RXN-12758_r	4.4101	5	4.1.2.34-RXN_r	3.95395	4	2.1.3.1-RXN_f	7.78804	2	HEMEOSYN-RXN	6.53767	2	RXN-14576
	RXN-17005	4.97453	NIL	RXN-17005	4.97453	NIL	RXN66-18	8.93415	1	RXN-15051_r	7.66799	1	RXN-10625	7.0223	1	3.5.1.86-RXN_f	3.91582	3	RXN-17842	3.74565	NIL	RXN-13182	4.41326	3	RXN-15909	4.41237	3	RXN0-3542_r	4.45371	NIL	RXN-19177	4.48448	NIL	RXN1F-475	4.64982	NIL	RXN-14432	4.41075	2	RXN-1404	3.95474	3	2.1.3.1-RXN_r	7.78804	2	RXN-17438	6.53823	NIL	RXN0-5393
	RXN-17529	4.98068	1	RXN-17529	4.98068	1	RXN66-318	8.93415	1	DIMETHUROPORDEHYDROG-RXN	7.67216	1	RXN-9951_f	7.03151	NIL	3.5.1.86-RXN_r	3.91582	3	RXN-20068	3.75305	3	RXN-19705	4.41582	2	RXN-11142	4.41246	3	RXN0-7022	4.45497	6	RXN-9584	4.48677	NIL	3.1.3.70-RXN	4.6504	3	RXN-8771	4.41182	1	RXN1F-101	3.95492	NIL	RXN-11664	7.79267	3	RXN-20396	6.53971	2	RXN-18840
	RXNQT-4338	4.98082	1	RXNQT-4338	4.98082	1	RXN66-313	8.93415	1	1.14.12.18-RXN	7.67597	1	RXN-9951_r	7.03151	NIL	RXN-19572	3.91598	3	RXN-8835	3.75616	5	RXN-19154	4.41588	NIL	RXN-13643	4.41817	1	TAGAALDOL-RXN	4.45511	4	UROGENIIISYN-RXN	4.48685	4	RXNQT-4191	4.65329	3	RXN-10647	4.41203	NIL	RXN-10910	3.95536	1	RXN-17447	7.8	NIL	RXN-864_f	6.54161	2	2.4.1.206-RXN
	RXN-18213	4.98082	1	RXN-18213	4.98082	1	RXN-20100	8.93415	1	PHTHALATE-45-DIOXYGENASE-RXN	7.6793	1	RXN-9848	7.03393	NIL	RXN-15261	3.91736	3	RXN-13424	3.75648	NIL	RXN-19298	4.41699	2	RXN-7303	4.41864	3	F16ALDOLASE-RXN_f	4.45511	4	RXN-19170	4.4869	NIL	RXN1G-1149	4.65454	NIL	RXN0-5393	4.41255	4	RXN-14910	3.95573	3	RXN-17438	7.80015	NIL	RXN-864_r	6.54161	2	RXN-15954
	RXNQT-4336	4.98082	1	RXNQT-4336	4.98082	1	RXN-20095	8.93415	NIL	RXN-14280	7.6877	1	RXN-8772_f	7.04197	1	NICOTINAMID-RXN	3.91938	3	RXN-12335_f	3.75773	4	RXN-17379	4.41713	2	RXN-19595	4.41953	3	F16ALDOLASE-RXN_r	4.45511	4	RXN-15739	4.4884	NIL	RXN1G-1152	4.65454	NIL	RXN-18759	4.41417	3	RXN-14948	3.95676	5	RXN-16011	7.80471	NIL	RXN-17447	6.54291	NIL	RXN-18068
	RXN-11513	4.98612	1	RXN-11513	4.98612	1	RXN-20116	8.93415	1	RXN-16859	7.70532	NIL	RXN-8772_r	7.04197	1	RXN3O-203	3.91992	NIL	RXN-12335_r	3.75773	4	MCHMBARK-RXN_f	4.41931	3	RXN66-362	4.42712	5	RXN-14562	4.45593	2	RXN-20575	4.48879	1	RXN1G-1150	4.65454	NIL	RXN-17519	4.41446	1	IPPISOM-RXN_f	3.95806	5	2.8.3.9-RXN_f	7.80792	2	R125-RXN_f	6.54471	2	RXN-14980
	1.2.1.47-RXN	4.99224	1	1.2.1.47-RXN	4.99224	1	RXN-20125	8.93415	1	GAPDHSYNEC-RXN_f	7.72949	1	RXN-12078_f	7.04197	1	PABASYN-RXN_f	3.92078	2	RXN1F-150	3.75778	5	MCHMBARK-RXN_r	4.41931	3	RXN-19188	4.42749	NIL	RXN0-7219	4.45624	NIL	2.4.1.67-RXN_f	4.48941	2	RXN1G-1151	4.65454	NIL	RXN-12753	4.41721	NIL	IPPISOM-RXN_r	3.95806	5	2.8.3.9-RXN_r	7.80792	2	R125-RXN_r	6.54471	2	3.4.24.32-RXN
	RXN-19870	4.99426	NIL	RXN-19870	4.99426	NIL	RXN-20109	8.93415	1	GAPDHSYNEC-RXN_r	7.72949	1	RXN-12078_r	7.04197	1	PABASYN-RXN_r	3.92078	2	RXN-17577	3.75808	3	RXN-13729	4.42242	4	RXN-21122	4.43234	NIL	RXN-18004	4.45984	NIL	2.4.1.67-RXN_r	4.48941	2	RXN-12330	4.65467	5	RXN-12754	4.41721	NIL	RXN-15638	3.95833	NIL	RXN-19587	7.80879	3	RXNARA-8002	6.55236	NIL	RXN-15332
	RXN-9971	5.00687	1	RXN-9971	5.00687	1	RXN-16580	8.93857	NIL	RXN-15033_f	7.7352	NIL	RXN-9882	7.04532	1	RXN-18697_f	3.92202	NIL	ACETYLCHOLINESTERASE-RXN	3.7587	3	RXN-15264	4.42274	2	RXN-15649	4.43277	4	RXN-15233_f	4.45984	NIL	RXN-14327	4.49023	NIL	PHOSACETYLGLUCOSAMINEMUT-RXN_f	4.65515	5	RXN-13813	4.41741	NIL	RXN-16483	3.95896	3	RXN-14400	7.80992	2	RXN-19177	6.56049	NIL	RXN-14051_f
	RXN-19113	5.00869	NIL	RXN-19113	5.00869	NIL	MYO-INOSITOL-2-DEHYDROGENASE-RXN_f	8.98264	1	RXN-15033_r	7.7352	NIL	RXN-20439	7.04798	1	RXN-18697_r	3.92202	NIL	CYPRIDINA-LUCIFERIN-2-MONOOXYGENASE-RXN	3.75958	1	RXN-8798	4.42767	NIL	RXN-12349	4.43279	1	RXN-15233_r	4.45984	NIL	RXN-14118	4.49037	3	PHOSACETYLGLUCOSAMINEMUT-RXN_r	4.65515	5	RXN-12844	4.41887	5	RXN-16074	3.96081	NIL	RXNARA-8002	7.81033	NIL	RXN-16011	6.56908	NIL	RXN-14051_r
	1.3.1.64-RXN_f	5.00878	1	1.3.1.64-RXN_f	5.00878	1	MYO-INOSITOL-2-DEHYDROGENASE-RXN_r	8.98264	1	RXN66-314	7.75395	1	1.5.1.20-RXN_f	7.0525	1	RXN-13938_f	3.92692	NIL	RXN-10644	3.75984	5	RXN-19191	4.42774	NIL	3.1.3.56-RXN	4.43754	3	ISOMALTULOSE-SYNTHASE-RXN_f	4.46293	5	RXN0-5363_f	4.4914	NIL	THI-P-SYN-RXN	4.65522	2	ATP-ADENYLYLTRANSFERASE-RXN_f	4.42164	2	CARBOXYCYCLOHEXADIENYL-DEHYDRATASE-RXN	3.96273	4	RXN-15680	7.81033	2	2.5.1.42-RXN	6.57771	2	RXN-14615
	1.3.1.64-RXN_r	5.00878	1	1.3.1.64-RXN_r	5.00878	1	8-OXOCOFORMYCIN-REDUCTASE-RXN	9.00334	1	RXN-11939	7.75395	1	1.5.1.20-RXN_r	7.0525	1	RXN-13938_r	3.92692	NIL	RXNQT-4344	3.76003	NIL	RXN-12330	4.43007	5	RXN-18769	4.43883	NIL	ISOMALTULOSE-SYNTHASE-RXN_r	4.46293	5	RXN0-5363_r	4.4914	NIL	RXN-14263	4.65666	3	ATP-ADENYLYLTRANSFERASE-RXN_r	4.42164	2	RXN-16303	3.96327	3	GLUTACONYL-COA-DECARBOXYLASE-RXN	7.81173	NIL	RXN-1106	6.58005	1	RXN-16078
	RXN-17145	5.01412	NIL	RXN-17145	5.01412	NIL	RXN-11566	9.0462	1	1.1.1.270-RXN	7.75395	1	RXN-11264	7.05356	NIL	HEME-OXYGENASE-DECYCLIZING-RXN	3.92704	1	CREATININASE-RXN_f	3.76826	3	RXN-14600	4.43132	3	RXN-4222	4.4398	NIL	ACNEULY-RXN_f	4.46322	4	RXN0-7219	4.4927	NIL	BA7DEHYDRA-RXN	4.65687	4	RXN-5462	4.42339	2	RXN-9432	3.9642	3	ISOHEXENYLGLUTACONYL-COA-HYDRATASE-RXN	7.81643	4	RXN-16130	6.58038	4	RXN-16571
	R542-RXN	5.01512	1	R542-RXN	5.01512	1	1.14.12.4-RXN	9.08387	1	RXN-13686	7.75395	1	RXN-17342_f	7.06597	1	RXN-15742	3.92774	NIL	CREATININASE-RXN_r	3.76826	3	2.1.1.132-RXN	4.43173	2	2.4.1.67-RXN_f	4.44112	2	ACNEULY-RXN_r	4.46322	4	3.1.4.2-RXN	4.49382	3	RXN-8144	4.65697	4	RXN-12338	4.42403	4	RXN-9443	3.9642	3	RXN-16395	7.8199	3	DOLICHYL-PHOSPHATASE-RXN	6.58187	3	RXN-19129
	CINNAMYL-ALCOHOL-DEHYDROGENASE-RXN_f	5.01581	1	CINNAMYL-ALCOHOL-DEHYDROGENASE-RXN_f	5.01581	1	RXN-11928	9.09472	1	RXN66-24	7.75395	1	RXN-17342_r	7.06597	1	RXN-17705	3.93154	NIL	RXN-21174	3.77153	NIL	RXN-17401	4.43209	4	2.4.1.67-RXN_r	4.44112	2	RXN-15313	4.46322	4	RXN-14858	4.49523	NIL	RXN-19336	4.65991	NIL	RXN0-7022	4.42612	6	RXN-9436	3.9642	3	RXN-9626	7.8199	3	RXN-19171	6.58231	NIL	THIOSULFATE--THIOL-SULFURTRANSFERASE-RXN_f
	CINNAMYL-ALCOHOL-DEHYDROGENASE-RXN_r	5.01581	1	CINNAMYL-ALCOHOL-DEHYDROGENASE-RXN_r	5.01581	1	RXN-20373	9.09472	1	1.1.1.278-RXN_f	7.75395	1	TCCOL-RXN	7.06641	NIL	RXN-19528	3.93215	NIL	RXN-21248	3.7732	NIL	RXN-8479	4.43412	NIL	RXN0-5183	4.44139	3	RXN-18067	4.46481	NIL	RXN-8766	4.49618	2	RXN-13209	4.6601	NIL	RXN-9457	4.42635	5	RXN-20192_f	3.96481	5	LINOLEOYL-RXN	7.8199	NIL	RXN-6383_f	6.59808	4	THIOSULFATE--THIOL-SULFURTRANSFERASE-RXN_r
	RXN-707	5.01874	1	RXN-707	5.01874	1	RXN-11959	9.09472	1	1.1.1.278-RXN_r	7.75395	1	RXN-17524	7.0753	1	RXN-7897	3.93218	NIL	RXN-19051	3.77659	4	RXN-16612_f	4.4342	3	RXN-14420	4.44294	2	RXN-13275	4.46539	2	RXN-8731	4.49656	3	RXN-19704	4.66075	2	RXN-11806	4.42726	NIL	RXN-20192_r	3.96481	5	RXN-13446	7.8199	NIL	RXN-6383_r	6.59808	4	RXN-15427
	RXN-9881	5.01924	1	RXN-9881	5.01924	1	RXN-20374	9.09472	1	RXN66-19	7.75395	1	RXN66-314	7.07602	1	RXN-10665	3.93383	4	RXN-11290	3.77847	3	RXN-16612_r	4.4342	3	RXN-16474	4.44531	3	RXN-8675	4.46984	NIL	RXN-18005	4.49796	NIL	RXN-13745	4.66267	NIL	RXN-19358	4.42792	2	RXN-11430	3.96539	3	RXN-9629	7.8199	3	RXN-17401	6.60826	4	RXN-9685
	N-ACYLMANNOSAMINE-1-DEHYDROGENASE-RXN_f	5.01928	1	N-ACYLMANNOSAMINE-1-DEHYDROGENASE-RXN_f	5.01928	1	RXN-20441	9.09472	1	RXN66-319	7.75395	1	RXN-11939	7.07602	1	RXN-7974	3.93399	1	RXN-8829	3.78038	5	3.5.4.27-RXN	4.43646	3	RXN0-7347_f	4.44587	NIL	RXN-12266_f	4.47132	NIL	RXN-16567_f	4.49796	4	RXN-12366	4.66321	2	RXN0-7343	4.42988	NIL	ARGSUCCINLYA-RXN_f	3.96557	4	RXN-16934	7.82237	NIL	RXN-12686	6.6116	3	RXN-15331
	N-ACYLMANNOSAMINE-1-DEHYDROGENASE-RXN_r	5.01928	1	N-ACYLMANNOSAMINE-1-DEHYDROGENASE-RXN_r	5.01928	1	RXN-11938	9.09472	1	RXN-20442	7.75395	1	1.1.1.270-RXN	7.07602	1	SULFATE-ADENYLYLTRANSFERASE-ADP-RXN	3.93417	2	PYRAZIN-RXN	3.78145	3	RXNQT-4398	4.4389	NIL	RXN0-7347_r	4.44587	NIL	RXN-12266_r	4.47132	NIL	RXN-16567_r	4.49796	4	RXN-17438	4.66644	NIL	RXN-15757	4.43337	NIL	ARGSUCCINLYA-RXN_r	3.96557	4	RXN-16938	7.82792	3	RXN-17442	6.61485	NIL	RXN-14392
	R222-RXN	5.02144	1	R222-RXN	5.02144	1	RXN-11933	9.09472	1	RXN-17590	7.75488	1	RXN-13686	7.07602	1	RXN0-6575	3.93443	4	RXN-21103	3.7839	NIL	UROGENIIISYN-RXN	4.43934	4	RXN-13648	4.44598	2	RXN-18493	4.47133	3	RXN-8284	4.49839	NIL	RXN-18773	4.66659	2	RXN-15760	4.43337	NIL	BLASTICIDIN-S-DEAMINASE-RXN_f	3.96649	3	RXN-7947	7.82981	5	RXN-12529	6.61675	NIL	RXN0-7343
	RXN-19622	5.02435	NIL	RXN-19622	5.02435	NIL	RXN-7970	9.10457	1	GLUCONATE-5-DEHYDROGENASE-RXN_f	7.75792	1	RXN66-24	7.07602	1	1.13.11.47-RXN	3.93724	1	4.2.99.19-RXN	3.78723	4	BA7DEHYDRA-RXN	4.44056	4	RXN-15980	4.44609	NIL	2.4.1.82-RXN	4.47202	2	RXN-17401	4.49905	4	RXN-19335	4.66845	2	RXN-9895	4.43403	5	BLASTICIDIN-S-DEAMINASE-RXN_r	3.96649	3	RXN-19253_f	7.82987	3	RXN-18273	6.61684	NIL	R8-RXN
	GLUTAMATE-SYNTHASE-NADH-RXN	5.02466	1	GLUTAMATE-SYNTHASE-NADH-RXN	5.02466	1	11-BETA-HYDROXYSTEROID-DEHYDROGENASE-RXN_f	9.1112	1	GLUCONATE-5-DEHYDROGENASE-RXN_r	7.75792	1	1.1.1.278-RXN_f	7.07602	1	RXN-7749	3.93846	NIL	RXN-8805	3.78723	4	2.5.1.32-RXN	4.4414	NIL	STREPTOMYCIN-3-ADENYLYLTRANSFERASE-RXN	4.4467	2	2.4.1.53-RXN	4.47263	2	H2NEOPTERINALDOL-RXN	4.49914	4	RXN-19378	4.66895	3	QUERCITRINASE-RXN	4.43672	3	RXNQT-4323	3.96699	4	RXN-19253_r	7.82987	3	UDP-NACMURALA-GLU-LIG-RXN	6.61851	6	RXN6666-2
	3-HYDROXYBENZOATE-4-MONOOXYGENASE-RXN	5.03013	1	3-HYDROXYBENZOATE-4-MONOOXYGENASE-RXN	5.03013	1	11-BETA-HYDROXYSTEROID-DEHYDROGENASE-RXN_r	9.1112	1	RXN-13565	7.75954	NIL	1.1.1.278-RXN_r	7.07602	1	RXN-19585	3.93919	NIL	RXN-17584	3.78723	4	RXN-17129	4.44622	4	APIGNAR-RXN	4.45003	5	RXN0-7066	4.47476	NIL	RXN-10857	4.49914	4	RXN-16750	4.66911	2	RXN-19251	4.43777	6	RXN-16946	3.96897	3	RXN-18585_f	7.8331	5	RXN-8810	6.62687	2	RXN-18222_f
	ACETOOHBUTREDUCTOISOM-RXN	5.03044	1	ACETOOHBUTREDUCTOISOM-RXN	5.03044	1	CINNAMOYL-COA-REDUCTASE-RXN	9.14031	1	RXN-13179	7.76174	1	RXN66-19	7.07602	1	RXN-13182	3.94181	3	CYANIDE-HYDRATASE-RXN	3.78961	4	NACGLCTRANS-RXN_f	4.44819	2	RXN-10622	4.45124	NIL	RXN-19251	4.47574	6	RXN-19167	4.50136	2	RXN-18554	4.66913	4	RXN-21344	4.43802	2	RXN-12364	3.97091	NIL	RXN-18585_r	7.8331	5	BA7DEHYDRA-RXN	6.62746	4	RXN-18222_r
	FCLREDUCT-RXN	5.03134	NIL	FCLREDUCT-RXN	5.03134	NIL	RXN-8825	9.17275	1	RXN-16860	7.76577	NIL	RXN66-319	7.07602	1	RXN-8222	3.94207	3	RXN-21020	3.79211	NIL	NACGLCTRANS-RXN_r	4.44819	2	RXN-9585	4.45197	NIL	RXN-9459	4.47897	3	2.5.1.69-RXN	4.50186	2	RXN-18017	4.67051	2	RXN-21335	4.43986	2	RXN-15593	3.97309	NIL	RXN-19166	7.83604	2	RXN-11434	6.63893	3	ISOHEXENYLGLUTACONYL-COA-HYDRATASE-RXN
	1.1.1.271-RXN	5.03134	1	1.1.1.271-RXN	5.03134	1	RXN-12264_f	9.18058	1	RXN-11720	7.7664	NIL	RXN-20442	7.07602	1	RXN-13355	3.95269	1	RXN-18585_f	3.79341	5	RXN-19166	4.45147	2	2.1.3.7-RXN	4.45206	2	RXN-8073	4.48001	NIL	RXN-14475	4.502	3	RXN-9494	4.67195	4	RXN-15755	4.44205	NIL	RXN-15964	3.97312	NIL	METHYLMALONYL-COA-DECARBOXYLASE-RXN	7.83654	4	RXN-8961_f	6.64079	4	RXN-19333
	RXN-13262	5.03396	4	RXN-13262	5.03396	4	RXN-12264_r	9.18058	1	RXN-8772_f	7.76939	1	RXN-16800	7.09854	1	RXN-19543	3.9527	3	RXN-18585_r	3.79341	5	RXN-10618	4.45382	2	SULFATE-ADENYLYLTRANSFERASE-ADP-RXN	4.45266	2	RXN-11789	4.48022	2	RXN0-3543	4.50275	NIL	RXN-886	4.67784	NIL	RXN-15759	4.44205	NIL	RXN-17150	3.97454	3	RXN0-310	7.83654	NIL	RXN-8961_r	6.64079	4	2.4.1.142-RXN
	RXN-9879	5.03906	1	RXN-9879	5.03906	1	1.1.1.209-RXN	9.18058	1	RXN-8772_r	7.76939	1	RXN-11849	7.09895	1	RXN-17683	3.95335	NIL	RXN-19301	3.79554	2	RXN-19792	4.45483	3	RXN-118	4.45288	NIL	RXN-16093	4.48118	NIL	RXN-3625	4.50348	NIL	RXN-18069_f	4.67949	NIL	RXN-10049	4.4426	3	RXN-21232	3.97577	1	RXN-20447	7.83658	NIL	TRANS-PENTAPRENYLTRANSFERASE-RXN	6.64629	2	RXN-8770
	RXN-8774	5.04335	1	RXN-8774	5.04335	1	RXN66-567_f	9.18058	1	RXN-12078_f	7.76939	1	RXN-11898	7.10664	1	RXN-16674	3.95601	NIL	RXN0-5398_f	3.79812	4	RXN18C3-15	4.45515	NIL	RXN18HP-6	4.45446	NIL	1.8.98.1-RXN	4.48121	1	RXN-13824	4.50903	NIL	RXN-18069_r	4.67949	NIL	RXN66-496	4.44299	3	RXN-21073	3.9773	NIL	RXN-17177	7.83883	2	RXN-9624	6.65519	3	1.14.20.1-RXN
	THREODEHYD-RXN	5.04455	1	THREODEHYD-RXN	5.04455	1	RXN66-567_r	9.18058	1	RXN-12078_r	7.76939	1	DXPREDISOM-RXN_f	7.11354	1	RXN-21171	3.95611	NIL	RXN0-5398_r	3.79812	4	RXN-18237	4.45538	2	3.1.4.2-RXN	4.45464	3	RXN-17188	4.48239	NIL	RXN-9992	4.50975	3	RXN-17401	4.6813	4	CITRAMALYL-COA-LYASE-RXN	4.44415	4	BETA-ALANYL-COA-AMMONIA-LYASE-RXN_f	3.97784	4	RXN-21122	7.84363	NIL	RXN-8081	6.6557	6	DOLICHYLDIPHOSPHATASE-RXN_f
	1.3.1.2-RXN_f	5.04573	1	1.3.1.2-RXN_f	5.04573	1	RXN-9841	9.18058	1	RXN-16095	7.77502	1	DXPREDISOM-RXN_r	7.11354	1	RXN-7461	3.95652	2	RXN-17608	3.79965	3	RXN-12686	4.45647	3	RXN-7082	4.45504	3	UDPMANACATRANS-RXN	4.48428	2	RXN-15649	4.51263	4	RXN-16988	4.6831	NIL	RXN-13231_f	4.44415	4	BETA-ALANYL-COA-AMMONIA-LYASE-RXN_r	3.97784	4	RXN-10904	7.84678	NIL	RXN-9385	6.65788	NIL	DOLICHYLDIPHOSPHATASE-RXN_r
	1.3.1.2-RXN_r	5.04573	1	1.3.1.2-RXN_r	5.04573	1	RXN-13688_f	9.18058	1	RXN-20345	7.77502	1	DIHYDROURACIL-DEHYDROGENASE-NAD+-RXN_f	7.11832	1	RXN-17042	3.95695	NIL	RXN-21231	3.80107	1	RXN-8976	4.45667	2	FADSYN-RXN_f	4.45662	2	RXN-18020	4.48584	2	RXN-19595	4.51276	3	RXN-19798	4.68438	NIL	RXN-13231_r	4.44415	4	RXN-12726	3.97837	2	RXN0-5225	7.8475	3	RXN-16247	6.66098	4	RXN3DJ-25
	1.14.13.18-RXN	5.04776	1	1.14.13.18-RXN	5.04776	1	RXN-13688_r	9.18058	1	RXN-5901	7.77502	1	DIHYDROURACIL-DEHYDROGENASE-NAD+-RXN_r	7.11832	1	RXN-14640	3.95772	3	R103-RXN	3.80331	4	RXN-18150	4.45877	3	FADSYN-RXN_r	4.45662	2	RXN-9584	4.48632	NIL	RXN1F-93	4.51305	1	RXNQT-4161	4.68499	NIL	2.4.1.83-RXN	4.44459	2	RXN-15979	3.98017	NIL	GSPAMID-RXN_f	7.84832	3	RXN-15680	6.663	2	RXN-17061
	RXN-11516	5.05143	1	RXN-11516	5.05143	1	RXN0-6565_f	9.19098	1	RXN-20337	7.77502	1	RXN18C3-22	7.12165	NIL	HIPPURATE-HYDROLASE-RXN	3.95799	3	RXN-15749	3.80373	NIL	3.4.17.11-RXN	4.46127	3	RXN-3625	4.45849	NIL	RXN-17334	4.48645	NIL	TRYPSYN-RXN	4.51305	4	RXN-13315	4.68576	NIL	RXN-16602	4.44459	2	4-PYRIDOXOLACTONASE-RXN	3.98197	3	GSPAMID-RXN_r	7.84832	3	RXN-19587	6.66577	3	RXN-13323
	RXN-14022	5.05702	NIL	RXN-14022	5.05702	NIL	RXN0-6565_r	9.19098	1	RXN-13301	7.77502	1	RXN18C3-23	7.12165	NIL	RXN-17685	3.95884	1	IPPISOM-RXN_f	3.80376	5	RXN-8799	4.46127	NIL	RXN-18509	4.45927	NIL	RXN-18017	4.48698	2	RXN-16251	4.51523	NIL	RXN-13518	4.6862	NIL	RXN-19975	4.44487	NIL	RXN-20580	3.98204	1	RXN-18697_f	7.85057	NIL	RXN-11485	6.66597	2	RXN-19629
	RXN-17175_f	5.05802	1	RXN-17175_f	5.05802	1	RXN-8820	9.19543	1	RXN-9544	7.77502	NIL	RXN-9880	7.12855	1	RXN-15362	3.96114	3	IPPISOM-RXN_r	3.80376	5	RXN-2222	4.46407	NIL	GLUCOSE-16-BISPHOSPHATE-SYNTHASE-RXN_f	4.45998	2	RXN-13971	4.49032	NIL	3.1.3.56-RXN	4.51533	3	HEMEOSYN-RXN	4.68979	2	RXN-12320	4.44535	2	RXN-20042	3.98451	NIL	RXN-18697_r	7.85057	NIL	RXN-10904	6.66909	NIL	RXN-19322
	RXN-17175_r	5.05802	1	RXN-17175_r	5.05802	1	RXN-16797	9.19543	1	3-HYDROXYBUTYRYL-COA-DEHYDROGENASE-RXN	7.77502	1	CARVEOL-DEHYDROGENASE-RXN	7.1292	1	THI-P-SYN-RXN	3.96154	2	5.4.4.3-RXN_f	3.80386	5	RXN-18234	4.46446	2	GLUCOSE-16-BISPHOSPHATE-SYNTHASE-RXN_r	4.45998	2	RXN-18838	4.49181	1	RXN-12349	4.51555	1	RXN-12816	4.69319	3	RXN-12103	4.4455	5	RXN-14429	3.98687	3	RXN-15682	7.8507	3	RXN-20218	6.67647	2	RXN0-4181
	RXN-2602_f	5.05961	1	RXN-2602_f	5.05961	1	RXN-16796	9.20399	1	RXN-13299	7.77502	1	RXN-9799	7.13541	NIL	LINA1-RXN	3.96234	NIL	5.4.4.3-RXN_r	3.80386	5	RXN-18238	4.46446	2	RXN-14996	4.46082	3	RXN-17129	4.49204	4	RXN-7946	4.51716	5	QUINOPRIBOTRANS-RXN	4.69366	2	RXN-13826	4.44588	NIL	RXNQT-4321	3.9874	4	RXN-19572	7.8513	3	GSPAMID-RXN_f	6.67863	3	RXN-15980
	RXN-2602_r	5.05961	1	RXN-2602_r	5.05961	1	RXN-15365	9.21882	NIL	RXN-17109	7.77502	1	RXN1YI0-11	7.14124	1	RXN0-7075_f	3.96243	2	3.5.1.86-RXN_f	3.80597	3	RXN-18771	4.46572	2	HYDROXYBUTYRATE-DIMER-HYDROLASE-RXN	4.46151	3	RXN-13821	4.49503	NIL	RIBULOSE-BISPHOSPHATE-CARBOXYLASE-RXN	4.51722	4	2.7.7.60-RXN	4.69408	2	RXN-15362	4.44618	3	RXN-1444	3.98759	3	RXN-14689	7.85409	1	GSPAMID-RXN_r	6.67863	3	RXN-14831
	R5-RXN_f	5.06396	1	R5-RXN_f	5.06396	1	D-PINITOL-DEHYDROGENASE-RXN_f	9.22773	1	RXN-13279_f	7.77502	1	RXN-16826	7.15289	NIL	RXN0-7075_r	3.96243	2	3.5.1.86-RXN_r	3.80597	3	RXN-18042	4.46623	NIL	RXN-19756	4.46287	NIL	RXN-15635	4.49685	2	RXN-17519	4.51822	1	2.4.1.65-RXN	4.69498	2	MALYL-COA-LYASE-RXN_f	4.45321	4	RXN-9869	3.98836	NIL	RXN-17785	7.85555	4	RXN-19166	6.68207	2	2.4.1.92-RXN
	R5-RXN_r	5.06396	1	R5-RXN_r	5.06396	1	D-PINITOL-DEHYDROGENASE-RXN_r	9.22773	1	RXN-13279_r	7.77502	1	GAPOXNPHOSPHN-RXN_f	7.15316	1	RXN-10102_f	3.96284	5	MIMOSINASE-RXN	3.80725	3	RXN-15502	4.46798	NIL	RXN-292	4.46485	NIL	RXN-18044	4.49762	NIL	RXN-19276	4.52059	NIL	RXN-12919	4.69558	NIL	MALYL-COA-LYASE-RXN_r	4.45321	4	RXN-15502	3.99084	NIL	RXN-17442	7.85599	NIL	RXN-9664	6.68317	5	RXN-17402
	PHENPRODIOLDEHYDROG-RXN	5.06473	1	PHENPRODIOLDEHYDROG-RXN	5.06473	1	RXN-13476	9.2369	1	RXN-16129	7.77502	1	GAPOXNPHOSPHN-RXN_r	7.15316	1	RXN-10102_r	3.96284	5	RXN-1761	3.8131	3	P-PANTOCYSDECARB-RXN	4.46807	4	N-SULFOGLUCOSAMINE-SULFOHYDROLASE-RXN	4.465	3	RXN-13315	4.4989	NIL	RXN-9579_f	4.52117	NIL	RXN-6261	4.6988	6	UDPACYLGLCNACDEACETYL-RXN	4.45434	3	RXN-12768_f	3.99121	2	RXN-12430	7.85978	3	RXN0-5225	6.69217	3	RXN-12364
	RXN-9408	5.07092	1	RXN-9408	5.07092	1	RXN-17339	9.23935	1	RXN-20341	7.77502	1	RXN-18600	7.17762	1	RXN-16864	3.96308	NIL	ALKYLMERCURY-LYASE-RXN_f	3.81615	4	RXN-12610	4.4681	2	ARYLDIALKYL-PHOSPHATASE-RXN	4.46658	3	RXN-13907	4.50052	1	RXN-9579_r	4.52117	NIL	RXN-11805	4.7004	NIL	RXN-12099	4.45648	5	RXN-12768_r	3.99121	2	METHYLACYLYLCOA-HYDROXY-RXN_f	7.86318	4	RXN-16938	6.69277	3	RXN-15878
	9-FLUORENOL-DEHYDROGENASE-RXN	5.071	1	9-FLUORENOL-DEHYDROGENASE-RXN	5.071	1	RXN-18713	9.26054	NIL	RXN-7698	7.77502	1	RXN-18601	7.17762	1	RXN-14181	3.96375	3	ALKYLMERCURY-LYASE-RXN_r	3.81615	4	RXN-13695	4.47509	3	RXN-10034	4.46882	3	1.21.3.1-RXN	4.50127	1	RXN-17344_f	4.52446	1	RXN-18298	4.70135	NIL	RXN-7946	4.45728	5	4.4.1.19-RXN	3.99379	4	METHYLACYLYLCOA-HYDROXY-RXN_r	7.86318	4	RXN-16079	6.69291	NIL	RXN-14415
	RXN-17424	5.07581	1	RXN-17424	5.07581	1	RXN-19165	9.26195	2	RXN-13300	7.77502	1	RXN-10091	7.18886	1	TRYPSYN-RXN	3.96397	4	SARCOX-RXN	3.81617	1	RXN-17377	4.47562	2	RXN-20645	4.47033	2	RXN-7759	4.50238	2	RXN-17344_r	4.52446	1	N-ACETYLNEURAMINATE-SYNTHASE-RXN	4.70367	2	ACETYL-COA-ACETYLTRANSFER-RXN_f	4.45834	2	RXN-19732	3.99393	3	RXN-19167	7.87317	2	RXN-9647	6.69291	NIL	RXN-17308
	RXN-10781	5.08333	1	RXN-10781	5.08333	1	ERYTHRON4PDEHYDROG-RXN	9.27062	1	RXN-20380	7.77502	1	L-GULONATE-3-DEHYDROGENASE-RXN_f	7.19469	1	S-NORLAUDANOSOLINE-SYNTHASE-RXN	3.9644	4	RXN-15578_f	3.81821	NIL	RXN-15443	4.47797	NIL	RXN-19755	4.47076	NIL	RXN-16778	4.50442	2	RXN-13340	4.52576	NIL	RXN-13210	4.7069	NIL	ACETYL-COA-ACETYLTRANSFER-RXN_r	4.45834	2	RXN-21318	3.99468	NIL	RXN-9231	7.87391	4	RXN-16082	6.69291	NIL	RXN-15289
	RXN-10092	5.09093	1	RXN-10092	5.09093	1	RXN-13483	9.2774	NIL	RXN-16154	7.77502	1	L-GULONATE-3-DEHYDROGENASE-RXN_r	7.19469	1	3-CH3-2-OXOBUTANOATE-OH-CH3-XFER-RXN_f	3.96893	2	RXN-15578_r	3.81821	NIL	RXN-10619	4.48695	2	RXN-17998	4.47086	NIL	RXN-2882	4.50711	4	RXN-21214	4.52851	3	RXN-13824	4.70699	NIL	2.3.1.72-RXN	4.45871	2	GST-RXN	3.996	2	UDPACYLGLCNACDEACETYL-RXN	7.87552	3	RXN-9543	6.69291	2	RXN-9222
	RXN-10090	5.09093	1	RXN-10090	5.09093	1	RXN1UA-50	9.3114	1	1.14.13.63-RXN	7.77903	1	ISOPIPERITENOL-DEHYDROGENASE-RXN	7.21688	1	3-CH3-2-OXOBUTANOATE-OH-CH3-XFER-RXN_r	3.96893	2	RXN-8040	3.81972	5	RXN-13938_f	4.48884	NIL	RXN0-5297	4.47227	NIL	RXN-13677	4.50716	3	RXN0-1461	4.53059	1	RXN-18234	4.70869	2	RXN0-1862	4.45911	2	RXN-19707	3.99605	3	RXN-19581	7.87918	3	RXN-13297	6.69291	2	OXALYL-COA-DECARBOXYLASE-RXN
	RXN-9877	5.09159	1	RXN-9877	5.09159	1	1.1.1.34-RXN_f	9.32668	1	RXN-16133_f	7.79519	1	RXN-9914	7.21809	1	RXN-19287	3.97183	1	RXN-12896	3.82093	NIL	RXN-13938_r	4.48884	NIL	RXN-16494	4.47274	NIL	RXN-7947	4.50832	5	RXN-7893	4.53066	NIL	RXN-18238	4.70869	2	RXN-11027	4.46141	NIL	BENZOIN-ALDOLASE-RXN_f	3.99672	4	RXN-20423_f	7.87969	NIL	RXN-16094	6.69291	2	RXN-17683
	RXN-11107_f	5.09515	NIL	RXN-11107_f	5.09515	NIL	1.1.1.34-RXN_r	9.32668	1	RXN-16133_r	7.79519	1	RXN-9912	7.21996	1	RXN-8220	3.97269	3	RXN-5468	3.82545	2	RXN-19013	4.49144	5	RXN-14609	4.47405	NIL	RXN-13104	4.50961	NIL	BA7DEHYDRA-RXN	4.53391	4	RXN-9674	4.71336	3	UNDECAPRENYL-DIPHOSPHATASE-RXN	4.46141	3	BENZOIN-ALDOLASE-RXN_r	3.99672	4	RXN-20423_r	7.87969	NIL	RXN-16081	6.69291	NIL	RXN-14724_f
	RXN-11107_r	5.09515	NIL	RXN-11107_r	5.09515	NIL	RXN-9874	9.33766	NIL	RXN-20676	7.79519	1	RXN-16802	7.26326	1	RXN-13157	3.97348	NIL	RXN-20788	3.82987	3	2.7.7.60-RXN	4.49446	2	R12-RXN_f	4.47432	5	RXN-13533	4.51377	NIL	RXN-19172	4.53671	NIL	RXN-8799	4.71579	NIL	RXN-10620	4.46252	1	RXN-19583	3.99705	4	RXN-13294	7.88269	2	RXN-13295	6.69291	2	RXN-14724_r
	RXN-11106_f	5.09515	1	RXN-11106_f	5.09515	1	RXN-10899	9.34288	NIL	RXN-16136	7.79519	NIL	RXN-10094	7.26805	1	RXN-19662	3.9771	NIL	NICOTINAMID-RXN	3.83225	3	RXN-16988	4.49463	NIL	R12-RXN_r	4.47432	5	URIDINE-NUCLEOSIDASE-RXN	4.5151	3	RXN0-303_f	4.53675	NIL	RXN-7866	4.71611	1	RXN-21110	4.46352	NIL	RXN-15016	3.99849	NIL	UDP-NACMURALA-GLU-LIG-RXN	7.89144	6	RXN-14429	6.69906	3	RXN-15333
	RXN-11106_r	5.09515	1	RXN-11106_r	5.09515	1	RXN-10900	9.34288	NIL	RXN-17798	7.79519	1	RXN-12661	7.27592	1	RXN-14160	3.9799	3	RXN-15805	3.83251	4	RXN-13824	4.49529	NIL	RXN-13123	4.47815	3	1.14.20.1-RXN	4.51543	1	RXN0-303_r	4.53675	NIL	RXN-7855	4.71611	1	RXN-15980	4.46394	NIL	RXN-16609_f	3.99926	3	3.4.17.11-RXN	7.89189	3	METHYLACYLYLCOA-HYDROXY-RXN_f	6.70444	4	RXN-18260
	RXN5F9-56	5.10458	NIL	RXN5F9-56	5.10458	NIL	RXN-10898	9.34288	NIL	RXN-20679	7.79519	1	RXN-10095	7.28331	1	GSPAMID-RXN_f	3.98224	3	RXN-12529	3.83285	NIL	RXN-17514_f	4.4958	4	RXN-11112	4.47847	3	RXN1F-20	4.5158	6	RXN18C3-16	4.53734	NIL	RXN-13677	4.71628	3	RXN-9915	4.46453	5	RXN-16609_r	3.99926	3	RXN-12686	7.89507	3	METHYLACYLYLCOA-HYDROXY-RXN_r	6.70444	4	TRANS-HEXAPRENYLTRANSTRANSFERASE-RXN
	RXN-10915_f	5.10506	1	RXN-10915_f	5.10506	1	RXN-10901	9.34288	NIL	OHACYL-COA-DEHYDROG-RXN	7.79519	1	RXN-10093	7.28429	1	GSPAMID-RXN_r	3.98224	3	RXN-16006_f	3.83498	5	RXN-17514_r	4.4958	4	RXN-8284	4.47909	NIL	RXN0-5409	4.51792	NIL	RXN-14063	4.53909	2	RXN-12583	4.71655	NIL	RXN-13693	4.46479	3	RXN1F-148	3.9999	5	RXN-20375	7.89559	2	RXN-13230_f	6.70589	5	RXN-18841
	RXN-10915_r	5.10506	1	RXN-10915_r	5.10506	1	RXN-13069	9.34602	1	RXN66-485	7.79519	NIL	RXN-20140	7.2877	1	PYRAZIN-RXN	3.98226	3	RXN-16006_r	3.83498	5	2.4.1.86-RXN	4.49644	2	RXN-19047	4.48018	NIL	RXN-10673	4.5195	2	RXN-13695	4.5429	3	2.5.1.67-RXN	4.71787	2	RXN-19707	4.465	3	RXN-12611	4.00046	2	CEPHALOSPORIN-C-DEACETYLASE-RXN	7.89683	3	RXN-13230_r	6.70589	5	RXN-18847
	RXN-11517	5.10612	1	RXN-11517	5.10612	1	1.1.1.53-RXN	9.34991	1	RXN-12570_f	7.79519	1	RXN-15824	7.2877	1	RXN-8036	3.9824	3	R381-RXN_f	3.83498	5	RXN-20581	4.49861	1	RXN-11981	4.48159	NIL	RXN-22	4.52182	4	3.1.3.46-RXN	4.54501	3	RXN-18067	4.71791	NIL	OXALYL-COA-DECARBOXYLASE-RXN	4.46516	4	FORMYLTHFDEFORMYL-RXN	4.00061	3	RXN-21213	7.90725	NIL	METHYL-COM-HTP-RXN_f	6.71348	2	RXN-21232
	3-DEHYDRO-L-GULONATE-2-DEHYDROGENASE-RXN_f	5.11189	1	3-DEHYDRO-L-GULONATE-2-DEHYDROGENASE-RXN_f	5.11189	1	RXN66-570	9.34991	NIL	RXN-12570_r	7.79519	1	PERILLYL-ALCOHOL-DEHYDROGENASE-RXN	7.2877	1	RXN-18360	3.98279	5	R381-RXN_r	3.83498	5	RXN-14703	4.50093	3	1.8.1.15-RXN	4.48178	1	RXN-20580	4.52228	1	RXN-19138	4.54536	4	RXN-13104	4.72043	NIL	RXN-13533	4.46631	NIL	RXN-16312	4.00462	1	1.21.3.1-RXN	7.90761	1	METHYL-COM-HTP-RXN_r	6.71348	2	RXN-12841
	3-DEHYDRO-L-GULONATE-2-DEHYDROGENASE-RXN_r	5.11189	1	3-DEHYDRO-L-GULONATE-2-DEHYDROGENASE-RXN_r	5.11189	1	1.1.1.145-RXN_f	9.34991	1	RXN-11662_f	7.79519	1	RXN0-7101_f	7.29488	NIL	4.2.99.19-RXN	3.98391	4	PROPIONATE-COA-TRANSFERASE-RXN_f	3.83794	2	2.4.1.78-RXN	4.50344	2	TANNASE-RXN	4.48333	3	RXN-13972	4.52613	NIL	RXN-11365	4.54741	3	RXN-21325	4.72083	NIL	RXN-14558_f	4.47064	2	IGPSYN-RXN	4.00465	4	RXN-20396	7.90883	2	RXN-11664	6.71418	3	6.3.1.10-RXN
	RXN-17969	5.11714	1	RXN-17969	5.11714	1	1.1.1.145-RXN_r	9.34991	1	RXN-11662_r	7.79519	1	RXN0-7101_r	7.29488	NIL	RXN-8805	3.98391	4	PROPIONATE-COA-TRANSFERASE-RXN_r	3.83794	2	RXN-20582	4.50408	1	RXN-17170	4.48379	NIL	RXN-19191	4.52667	NIL	RXN0-4361	4.54741	3	RXN-17379	4.72093	2	RXN-14558_r	4.47064	2	RXN-17149	4.00476	NIL	RXN-21196	7.91554	NIL	RXN-11458	6.71445	NIL	RXN18C3-235
	1.14.13.84-RXN	5.11892	1	1.14.13.84-RXN	5.11892	1	RXN-11209_f	9.34998	1	RXN-12507	7.79519	NIL	RXN-13222	7.29994	1	RXN-17584	3.98391	4	RXN-13643	3.84106	1	RXN-19699	4.50485	2	GALACTOSE-OXIDASE-RXN	4.48459	1	RXN-14005	4.52693	NIL	RXN-13852	4.54779	1	RXN-17078	4.72131	NIL	RXN-18119	4.47064	2	DIHYDROCOUMARIN-LIPASE-RXN	4.00483	3	RXN-21192	7.917	NIL	RXN-19167	6.71599	2	RXN-13694
	RXN-13106	5.12019	1	RXN-13106	5.12019	1	RXN-11209_r	9.34998	1	RXN-17115	7.79519	NIL	SEPIAPTERIN-REDUCTASE-RXN	7.29994	1	R82-RXN	3.98427	5	SULFITE-OXIDASE-RXN	3.84166	1	RXN-11029	4.50713	2	HEMN-RXN	4.48631	1	KDO-8PPHOSPHAT-RXN	4.52745	3	RXN-12575	4.54977	3	RXN-12238	4.72131	2	RXN-15659	4.47064	NIL	RXN-20168	4.00639	1	RXN0-1842	7.91849	2	GLYOXI-RXN_f	6.71681	4	TRYPTOPHAN-DIMETHYLALLYLTRANSFERASE-RXN
	RXN-12654	5.12441	1	RXN-12654	5.12441	1	RXN-16799	9.35829	1	RXN-14275	7.79519	NIL	RXN-1125	7.30649	1	AROMATIC-L-AMINO-ACID-DECARBOXYLASE-RXN	3.98516	4	GLYCINE-AMIDINOTRANSFERASE-RXN	3.84178	2	RXN-16474	4.50726	3	RXN-21214	4.48742	3	RXN-18659	4.53012	3	RXN-12550	4.54977	3	RXN-10002	4.72131	2	RXN-11772	4.47068	4	RXN-21206	4.00779	NIL	RXN-864_f	7.91929	2	GLYOXI-RXN_r	6.71681	4	COBINAMIDEKIN-RXN
	RXN-9853	5.12681	1	RXN-9853	5.12681	1	RXN-9873	9.36017	NIL	RXN-12490	7.79519	1	RXN-21224	7.31073	1	RXN-13681	3.98688	1	RXN-19327	3.84199	NIL	RXN-14861	4.51063	NIL	RXN-16762	4.49183	NIL	RXN0-3521	4.53113	2	RXN-12576	4.54977	3	RXN0-4301	4.72295	5	RXN-15756	4.47148	NIL	2.3.1.72-RXN	4.01085	2	RXN-864_r	7.91929	2	RXN-14716_f	6.71824	5	RXN-12706
	DIAMINOPIMELATE-DEHYDROGENASE-RXN_f	5.13139	1	DIAMINOPIMELATE-DEHYDROGENASE-RXN_f	5.13139	1	RXN-16924	9.38777	NIL	R23-RXN	7.79692	NIL	RXN-9875	7.31318	1	RXN-8845	3.98775	3	METHYL-COM-HTP-RXN_f	3.84608	2	RXN-18554	4.51165	4	RXN-19167	4.49388	2	RXN-11072	4.53637	NIL	RXN-12579	4.54977	3	TEICHOICSYN5-RXN	4.7236	2	RXNQT-4341	4.47164	NIL	BIPHENYL-23-DIOL-12-DIOXYGENASE-RXN	4.01157	1	RXN-17832	7.9218	3	RXN-14716_r	6.71824	5	RXN-8472
	DIAMINOPIMELATE-DEHYDROGENASE-RXN_r	5.13139	1	DIAMINOPIMELATE-DEHYDROGENASE-RXN_r	5.13139	1	ALBENDAZOLE-MONOOXYGENASE-RXN	9.39046	1	RXN0-6367	7.80256	1	1.3.1.53-RXN	7.31365	1	ACETYLCHOLINESTERASE-RXN	3.98827	3	METHYL-COM-HTP-RXN_r	3.84608	2	RXN-11363	4.51467	2	RXN18C3-16	4.49558	NIL	2.7.7.60-RXN	4.53712	2	RXN-14609	4.55411	NIL	RXN-8205	4.72716	NIL	2.5.1.39-RXN	4.47499	2	4.2.3.27-RXN	4.01276	4	METHYLGLUTACONYL-COA-HYDRATASE-RXN_f	7.92183	4	RXN-18697_f	6.72018	NIL	UROGENIIISYN-RXN
	RXN-20682	5.13168	NIL	RXN-20682	5.13168	NIL	HYDROXYMETHYLGLUTARYL-COA-REDUCTASE-RXN_f	9.40686	1	1.2.1.67-RXN	7.80858	1	1.2.1.13-RXN	7.32267	1	RXN-17690	3.98892	1	RXN-12609	3.84915	5	RXN-18249	4.51553	2	RXN-7656	4.49636	NIL	THIAZOLSYN2-RXN	4.53777	2	RXN-13208	4.55632	NIL	ECDYSONE-OXIDASE-RXN	4.73606	1	RXN-12675_f	4.4773	5	1.13.11.38-RXN	4.01366	1	METHYLGLUTACONYL-COA-HYDRATASE-RXN_r	7.92183	4	RXN-18697_r	6.72018	NIL	CHLOROGENATE-HYDROLASE-RXN
	RXN-20680	5.13168	NIL	RXN-20680	5.13168	NIL	HYDROXYMETHYLGLUTARYL-COA-REDUCTASE-RXN_r	9.40686	1	RXN0-4022	7.8135	1	1.3.1.2-RXN_f	7.32636	1	RXN-12655	3.98906	NIL	2.1.1.21-RXN_f	3.85161	2	RXN-9301	4.51641	NIL	RXN-17447	4.49793	NIL	2.5.1.32-RXN	4.53799	NIL	RXN-8217	4.557	NIL	RXN-12744	4.73927	NIL	RXN-12675_r	4.4773	5	RXN-12404	4.01383	NIL	R346-RXN	7.9251	3	RXN-8357	6.72205	3	RXN-16131
	RXN-8775	5.13769	1	RXN-8775	5.13769	1	1.1.1.222-RXN	9.40737	1	RXN-16087	7.81851	NIL	1.3.1.2-RXN_r	7.32636	1	RXN-11290	3.98914	3	2.1.1.21-RXN_r	3.85161	2	2.4.1.117-RXN	4.51958	2	RXN-18841	4.50126	NIL	RXN-8883	4.53964	NIL	RXN-961	4.55831	NIL	HEMN-RXN	4.7403	1	2.3.1.166-RXN	4.47867	2	QUINOLINATE-SYNTHA-RXN	4.01389	2	RXN-8357	7.93435	3	RXN-18585_f	6.72912	5	RXN0-963
	RXN-16587	5.13945	NIL	RXN-16587	5.13945	NIL	RXN-17535	9.40749	NIL	RXN-9796	7.83137	1	RXN-10079	7.33594	1	RXN-9411	3.98982	NIL	RXN-2189	3.8556	NIL	THI-P-SYN-RXN	4.52107	2	RXN-18847	4.50126	NIL	KIEVITONE-HYDRATASE-RXN	4.54087	4	RXN-9231	4.56307	4	2.1.1.131-RXN	4.74066	2	2.4.1.54-RXN_f	4.47998	2	RXN-12026	4.01635	NIL	RXN-17166	7.93613	NIL	RXN-18585_r	6.72912	5	RXN-9850
	RXN-15032	5.14512	NIL	RXN-15032	5.14512	NIL	RXN-18712	9.40958	NIL	RXN-9397	7.86312	1	RXN-8821	7.34657	1	RXN-9410	3.98982	NIL	RXN-9488	3.85601	3	H2NEOPTERINP3PYROPHOSPHOHYDRO-RXN	4.5223	3	RXN-19171	4.50251	NIL	RXN-13745	4.54213	NIL	RXN-17826	4.56494	3	RXN-11072	4.74905	NIL	2.4.1.54-RXN_r	4.47998	2	RXN-15425_f	4.01668	2	RXN-8965	7.93667	4	RXN-21073	6.74236	NIL	RXN-21006
	RXN-13587_f	5.1456	1	RXN-13587_f	5.1456	1	RXN-18717	9.41893	NIL	RXN-13081	7.88129	1	RXN-15034	7.36593	NIL	RXN-20423_f	3.99071	NIL	RXN0-7075_f	3.85781	2	RXN-19698	4.52253	2	RXN-10744	4.50688	1	PHOSACETYLGLUCOSAMINEMUT-RXN_f	4.5428	5	RXN-17095	4.56557	3	RXN-18769	4.74942	NIL	RXN-8476	4.48101	2	RXN-15425_r	4.01668	2	RXN-13908	7.94407	4	4.2.1.100-RXN_f	6.75141	4	RXN-10966
	RXN-13587_r	5.1456	1	RXN-13587_r	5.1456	1	RXN-13564	9.42027	NIL	RXN-16803	7.89561	1	ALDOSE-6-PHOSPHATE-REDUCTASE-NADPH-RXN_f	7.37012	1	RXN-20423_r	3.99071	NIL	RXN0-7075_r	3.85781	2	RXN-15959	4.52377	NIL	RXN-15295	4.50744	1	PHOSACETYLGLUCOSAMINEMUT-RXN_r	4.5428	5	RXN-19360	4.56594	2	RXN-14617	4.75178	3	RXN-19595	4.48259	3	RXN-15483	4.01669	NIL	RXN-14804_f	7.94665	5	4.2.1.100-RXN_r	6.75141	4	PROTOPORGENOXI-RXN
	RXN-14116	5.14615	1	RXN-14116	5.14615	1	RXN-10032	9.43557	1	RXN-9951_f	7.90074	NIL	ALDOSE-6-PHOSPHATE-REDUCTASE-NADPH-RXN_r	7.37012	1	RXNN-386_f	3.99107	5	RXN-17998	3.86254	NIL	RXN-4222	4.52657	NIL	RXN-19043	4.50883	NIL	RXN-12816	4.545	3	RXN-9459	4.5685	3	RXN-17447	4.75389	NIL	RXN-15730	4.4826	4	RXN1F-151	4.01707	5	RXN-14804_r	7.94665	5	GLYOXII-RXN	6.75409	3	LIPIDADISACCHARIDESYNTH-RXN
	PYRROLINECARBDEHYDROG-RXN	5.14615	NIL	PYRROLINECARBDEHYDROG-RXN	5.14615	NIL	1.2.1.45-RXN	9.43653	1	RXN-9951_r	7.90074	NIL	MANNOSE-6-PHOSPHATE-6-REDUCTASE-RXN	7.37012	1	RXNN-386_r	3.99107	5	LIGNOSTILBENE-ALPHA-BETA-DIOXYGENASE-RXN	3.86279	1	RXN-14856	4.52742	NIL	2.4.1.82-RXN	4.51034	2	RXNARA-8002	4.54709	NIL	RXN-11981	4.56932	NIL	RXN18C3-13	4.75752	NIL	RXN-7854	4.48278	1	RXN-8502	4.01961	NIL	RXN-15724_f	7.94932	2	RXN-20556	6.76117	3	RXN-13315
	RXN-12071	5.14849	1	RXN-12071	5.14849	1	RXN0-7021	9.43961	NIL	DXPREDISOM-RXN_f	7.90197	1	CINNAMYL-ALCOHOL-DEHYDROGENASE-RXN_f	7.37078	1	RXN-19282	3.9919	5	1.20.98.1-RXN	3.8642	1	RXN-7984	4.52782	NIL	RXN-14005	4.51288	NIL	RXN-9579_f	4.54907	NIL	RXN-7656	4.57527	NIL	RXN-13648	4.7579	2	RXN-7570	4.48785	5	METHENYLTHFCYCLOHYDRO-RXN_f	4.02425	3	RXN-15724_r	7.94932	2	2.1.1.131-RXN	6.76472	2	RXN-13693
	RXN-16537	5.15829	NIL	RXN-16537	5.15829	NIL	RXN-11565	9.45087	1	DXPREDISOM-RXN_r	7.90197	1	CINNAMYL-ALCOHOL-DEHYDROGENASE-RXN_r	7.37078	1	METHYLITACONATE-DELTA-ISOMERASE-RXN	3.99395	5	ACETONE-CYANHYDRIN-LYASE-RXN	3.86792	4	RXN-12611	4.52792	2	BETA-ALANYL-COA-AMMONIA-LYASE-RXN_f	4.51409	4	RXN-9579_r	4.54907	NIL	RXN-5472	4.57536	2	RXN0-7192	4.76088	6	RXN-12847	4.48873	5	METHENYLTHFCYCLOHYDRO-RXN_r	4.02425	3	RXN-15723_f	7.94932	2	RXN-10009	6.76687	2	RXN-1083
	1.14.13.59-RXN	5.18032	1	1.14.13.59-RXN	5.18032	1	RXN-11407	9.45159	1	RXN-11264	7.90967	NIL	1.14.12.15-RXN	7.37191	1	RXN-9888	3.99454	NIL	RXN-18180	3.86808	NIL	RXN-15413	4.52902	NIL	BETA-ALANYL-COA-AMMONIA-LYASE-RXN_r	4.51409	4	RXN-18576	4.55239	4	RXN-13203	4.57862	2	ACNEULY-RXN_f	4.76232	4	RXN-17334	4.49258	NIL	RXN-9889	4.02501	NIL	RXN-15723_r	7.94932	2	2.8.3.9-RXN_f	6.77903	2	RXN-12349
	RXN-9854	5.19259	1	RXN-9854	5.19259	1	URONATE-DEHYDROGENASE-RXN	9.45159	1	RXN-9882	7.93702	1	RXN0-7020	7.37546	1	URA-PHOSPH-RXN_f	3.99493	2	RXN-18181	3.86808	NIL	RXN-13852	4.52981	1	RXN66-354	4.51529	5	RXN-10895	4.55327	NIL	RXN-4161_f	4.57877	5	ACNEULY-RXN_r	4.76232	4	RXN-17061	4.49314	NIL	RXN-10082	4.02671	5	RXN-18273	7.95134	NIL	2.8.3.9-RXN_r	6.77903	2	RXN-18485
	DIIODOPHENYLPYRUVATE-REDUCTASE-RXN_f	5.20937	1	DIIODOPHENYLPYRUVATE-REDUCTASE-RXN_f	5.20937	1	RXN-5041	9.47597	NIL	RXN-18600	7.95575	1	RXN-14367	7.38019	NIL	URA-PHOSPH-RXN_r	3.99493	2	RXN-19038_f	3.86812	4	RXN-16596	4.53453	NIL	RXN-13340	4.51621	NIL	RXN-18307	4.55485	2	RXN-4161_r	4.57877	5	RXN-15313	4.76232	4	RXN-10930	4.4939	NIL	RXN-172	4.02739	NIL	DOLICHYLDIPHOSPHATASE-RXN_f	7.9586	3	RXN-15977	6.78338	1	RXN0-5227
	DIIODOPHENYLPYRUVATE-REDUCTASE-RXN_r	5.20937	1	DIIODOPHENYLPYRUVATE-REDUCTASE-RXN_r	5.20937	1	1.5.1.34-RXN	9.48671	1	RXN-18601	7.95575	1	RXN66-478	7.38092	1	RXN-12237_f	3.99576	4	RXN-19038_r	3.86812	4	2.4.1.65-RXN	4.53581	2	RXN-11751_f	4.5163	3	RXN-19595	4.55524	3	RXN-15966	4.57882	NIL	RXN-13972	4.76355	NIL	ALKYLGLYCERONE-PHOSPHATE-SYNTHASE-RXN	4.49727	2	RXN-9591	4.03142	2	DOLICHYLDIPHOSPHATASE-RXN_r	7.9586	3	TIGLYLCOA-HYDROXY-RXN_f	6.79312	4	RXN-8885
	1.1.1.190-RXN	5.21449	1	1.1.1.190-RXN	5.21449	1	RXN-14880	9.49159	NIL	RXN-663	7.95854	1	RXN-16304	7.38473	NIL	RXN-12237_r	3.99576	4	RXN-11731_f	3.86864	4	RXN-14979	4.53766	2	RXN-11751_r	4.5163	3	2.4.1.149-RXN	4.55761	2	RXN-19543	4.58343	3	RXN-14361	4.7647	2	METHYL-COM-HTP-RXN_f	4.49781	2	RXN-16311_f	4.0315	NIL	RXN-14777_f	7.96143	5	TIGLYLCOA-HYDROXY-RXN_r	6.79312	4	RXN-8434
	RXN-18329_f	5.22126	NIL	RXN-18329_f	5.22126	NIL	RXN-13158	9.54339	1	RXN18C3-22	7.96749	NIL	RXN-10845	7.40009	1	RXN-18585_f	3.99733	5	RXN-11731_r	3.86864	4	RXN-12263	4.54081	2	RXN-15502	4.51683	NIL	RXN-14285	4.55771	2	RXN18C3-14	4.58503	3	RXN-11290	4.7657	3	METHYL-COM-HTP-RXN_r	4.49781	2	RXN-16311_r	4.0315	NIL	RXN-14777_r	7.96143	5	TRANS-HEXAPRENYLTRANSTRANSFERASE-RXN	6.80061	2	RXN-14844
	RXN-18329_r	5.22126	NIL	RXN-18329_r	5.22126	NIL	RXN66-314	9.54537	1	RXN18C3-23	7.96749	NIL	RXN-19114	7.40055	1	RXN-18585_r	3.99733	5	RXN-8502	3.87106	NIL	RXN-17506_f	4.54341	3	RXN1G-2	4.5171	3	RXN-15980	4.55889	NIL	2.4.1.82-RXN	4.58663	2	RXN-18252	4.76579	2	RXN0-7066	4.4981	NIL	RXN-17714_f	4.03169	NIL	2.1.1.131-RXN	7.96313	2	RXN-20423_f	6.81079	NIL	RXN-13872_f
	RXN-13108	5.22134	1	RXN-13108	5.22134	1	RXN-11939	9.54537	1	RXN-17342_f	7.97446	1	RXN-14425	7.40078	1	RXN-19707	3.99808	3	RXN-9600	3.87203	1	RXN-17506_r	4.54341	3	3.1.1.82-RXN	4.51949	3	RXN-9664	4.55973	5	RXN-18450	4.58676	2	RXN-16259	4.7668	NIL	RXN-19974	4.49999	NIL	RXN-17714_r	4.03169	NIL	COBINPGUANYLYLTRANS-RXN	7.96786	2	RXN-20423_r	6.81079	NIL	RXN-13872_r
	RXN-19112	5.2242	NIL	RXN-19112	5.2242	NIL	1.1.1.270-RXN	9.54537	1	RXN-17342_r	7.97446	1	RXN-19113	7.40289	NIL	4.99.1.3-RXN	3.99961	4	RXN-15413	3.87442	NIL	RXN-14113	4.54579	3	RXN-20732	4.52095	3	RXN0-1461	4.56029	1	2.1.1.131-RXN	4.5871	2	RXN-9699	4.76901	2	RXN0-1382_f	4.50275	2	RXN-12407_f	4.03205	2	RXN-17401	7.96997	4	RXN-11663	6.81413	2	RXN-13859
	RXN-20649	5.23133	1	RXN-20649	5.23133	1	RXN-13686	9.54537	1	L-GULONATE-3-DEHYDROGENASE-RXN_f	7.9856	1	RXN-10078	7.40303	1	SIROHEME-FERROCHELAT-RXN	3.99961	4	RXN0-6460	3.87473	NIL	RXN-11054	4.54674	4	3.1.3.69-RXN	4.5253	3	RXN-12115	4.56113	1	RXN-16225	4.59201	3	RXN-13971	4.7728	NIL	RXN0-1382_r	4.50275	2	RXN-12407_r	4.03205	2	RXN0-268_f	7.97024	NIL	R346-RXN	6.81663	3	NADNUCLEOSID-RXN
	RXN-12898_f	5.2357	1	RXN-12898_f	5.2357	1	RXN66-24	9.54537	1	L-GULONATE-3-DEHYDROGENASE-RXN_r	7.9856	1	RXN-12658	7.40722	1	RXN-8059	3.99961	4	RXN-16322	3.87516	1	RXN-15912	4.54808	NIL	RXN-13144_f	4.52629	2	RXN3O-504	4.56361	NIL	SUCROSE-PHOSPHORYLASE-RXN	4.59219	2	RXN-6687	4.77497	2	THI-P-SYN-RXN	4.50316	2	HISTCYCLOHYD-RXN	4.03213	3	RXN0-268_r	7.97024	NIL	RXN-21213	6.81966	NIL	RXN-18067
	RXN-12898_r	5.2357	1	RXN-12898_r	5.2357	1	1.1.1.278-RXN_f	9.54537	1	RXN1YI0-11	7.98606	1	RXN-18331_f	7.41714	NIL	RXN-7686	3.99964	1	RXN-1022	3.87601	NIL	RXN-15497	4.54972	NIL	RXN-13144_r	4.52629	2	RXN-17002	4.56816	NIL	RXN-18337	4.59368	2	RXN18C3-11	4.77879	NIL	RXN-10673	4.50328	2	2.7.8.23-RXN_f	4.03521	2	RXN18HP-6	7.97085	NIL	RXN-1083	6.8203	4	RXN-17178
	RXN-14686	5.24368	1	RXN-14686	5.24368	1	1.1.1.278-RXN_r	9.54537	1	CARVEOL-DEHYDROGENASE-RXN	7.98983	1	RXN-18331_r	7.41714	NIL	RXN-8763	3.99982	3	RXN-21152	3.87607	NIL	RXN-19167	4.55067	2	RHAMNULPALDOL-RXN_f	4.5265	4	RFFTRANS-RXN_f	4.56833	2	1.8.98.1-RXN	4.59407	1	RXN0-3542_f	4.78105	NIL	ISOBUTYRYL-COA-MUTASE-RXN_f	4.50417	5	2.7.8.23-RXN_r	4.03521	2	RXN-16709	7.97113	NIL	RXN-17129	6.82369	4	RXN-22
	ISOCITRATE-DEHYDROGENASE-NAD+-RXN	5.24393	1	ISOCITRATE-DEHYDROGENASE-NAD+-RXN	5.24393	1	RXN66-19	9.54537	1	GAPOXNPHOSPHN-RXN_f	7.99672	1	RXN-17808	7.42084	1	RXN-10081_f	4.00161	5	HISTIDPHOS-RXN	3.87944	3	RXN-16709	4.55155	NIL	RHAMNULPALDOL-RXN_r	4.5265	4	RFFTRANS-RXN_r	4.56833	2	RXN-15295	4.59437	1	RXN0-3542_r	4.78105	NIL	ISOBUTYRYL-COA-MUTASE-RXN_r	4.50417	5	RXN1F-164	4.03521	NIL	RXN-16710	7.97113	NIL	RXN-16117	6.82523	2	2.3.1.176-RXN
	OCTANOL-DEHYDROGENASE-RXN_f	5.2453	1	OCTANOL-DEHYDROGENASE-RXN_f	5.2453	1	RXN66-319	9.54537	1	GAPOXNPHOSPHN-RXN_r	7.99672	1	DCDPC-RXN	7.42804	1	RXN-10081_r	4.00161	5	RXN-17532	3.87999	NIL	RXN-16710	4.55155	NIL	FUCPALDOL-RXN	4.5265	4	2.6.1.33-RXN_f	4.56833	2	RXN-10902	4.59774	NIL	RXN-18576	4.78109	4	UDP-NACMUR-ALA-LIG-RXN	4.50527	6	RXN-9886_f	4.03523	5	RXN-15734	7.97308	2	RXN-20513	6.82523	2	RXN0-6256
	OCTANOL-DEHYDROGENASE-RXN_r	5.2453	1	OCTANOL-DEHYDROGENASE-RXN_r	5.2453	1	RXN-20442	9.54537	1	DIHYDROURACIL-DEHYDROGENASE-NAD+-RXN_f	8.00417	1	RXN-16061_f	7.42992	1	RXN-18004	4.00186	NIL	RXN-17344_f	3.88294	1	RXNQT-4341	4.55266	NIL	RXN-7304	4.52729	3	2.6.1.33-RXN_r	4.56833	2	RXN-10903	4.59774	NIL	RXN-8766	4.78249	2	RXN-15979	4.50907	NIL	RXN-9886_r	4.03523	5	TRANS-PENTAPRENYLTRANSFERASE-RXN	7.97333	2	RXN-13805	6.82523	2	RXN-17206
	RXN-18328_f	5.24881	NIL	RXN-18328_f	5.24881	NIL	RXN-18716	9.55047	NIL	DIHYDROURACIL-DEHYDROGENASE-NAD+-RXN_r	8.00417	1	RXN-16061_r	7.42992	1	RXN-15233_f	4.00186	NIL	RXN-17344_r	3.88294	1	RXN-4221	4.55437	NIL	RXN-19170	4.52916	NIL	6-BETA-HYDROXYHYOSCYAMINE-EPOXIDASE-RXN	4.56876	1	APIGNAR-RXN	4.59805	5	RXN0-5398_f	4.78392	4	RXN-10769	4.51032	3	RXN-9856	4.03679	5	RXN-11458	7.97706	NIL	RXN-16934	6.83022	NIL	METHYLACYLYLCOA-HYDROXY-RXN_f
	RXN-18328_r	5.24881	NIL	RXN-18328_r	5.24881	NIL	RXN-1101	9.57111	1	TCCOL-RXN	8.01531	NIL	RXN-13414	7.44271	NIL	RXN-15233_r	4.00186	NIL	R342-RXN	3.88452	6	RXN-8797	4.55504	NIL	4-ACETAMIDOBUTYRYL-COA-DEACETYLASE-RXN	4.52998	3	RXN-13176	4.57081	2	HYDROXYBUTYRATE-DIMER-HYDROLASE-RXN	4.59855	3	RXN0-5398_r	4.78392	4	RXN-14021	4.51289	3	N-SULFOGLUCOSAMINE-SULFOHYDROLASE-RXN	4.04086	3	RXN-11485	7.98032	2	RXN0-268_f	6.83336	NIL	METHYLACYLYLCOA-HYDROXY-RXN_r
	RXN-20922	5.2502	NIL	RXN-20922	5.2502	NIL	RXN-19160	9.57468	2	RXN-9880	8.01797	1	RXN-11513	7.4468	1	RXN-12726	4.00266	2	INORGPYROPHOSPHAT-RXN	3.89032	3	RXN-17213	4.55754	NIL	LACTOYL-COA-DEHYDRATASE-RXN	4.53032	4	RXN-14865	4.57101	3	RXN3O-203	4.59874	NIL	RXN-13819	4.78488	NIL	RXN-13728_f	4.51442	2	RXN-15547	4.04213	NIL	RXN-20788	7.98474	3	RXN0-268_r	6.83336	NIL	RXN-7984
	RXN-8014	5.25234	NIL	RXN-8014	5.25234	NIL	RXN-13724	9.58264	1	RXN-11849	8.02212	1	RXN-11794	7.45441	NIL	RXN-15289	4.00359	3	ALPHA-PINENE-OXIDE-DECYCLASE-RXN_f	3.89245	5	RXN-17139	4.55874	1	RXN-12963	4.53122	1	RXN-19973	4.57116	NIL	RXN-6687	4.59879	2	RXN-17459	4.78717	NIL	RXN-13728_r	4.51442	2	RXN-20575	4.04693	1	RXN-9624	7.98877	3	RXN-17832	6.83434	3	RXN-19360
	RXN-13194	5.25362	1	RXN-13194	5.25362	1	CHLOROMALERED-RXN	9.58839	1	RXN-16800	8.02402	1	RXN-11679	7.4589	NIL	RXN-15578_f	4.00478	NIL	ALPHA-PINENE-OXIDE-DECYCLASE-RXN_r	3.89245	5	RXN-12234_f	4.56142	NIL	RXN-14995	4.5318	3	RXN-10672	4.57182	2	RXN-10744	4.599	1	RXN-7064	4.79055	NIL	RXN-16078	4.51504	NIL	AICARTRANSFORM-RXN_f	4.04906	2	1.5.4.1-RXN	7.99387	1	RXN-8890	6.83492	4	1.11.1.12-RXN
	1.5.1.24-RXN	5.26363	1	1.5.1.24-RXN	5.26363	1	RXNQT-4178	9.59536	1	RXN-11898	8.02413	1	RXN-10891	7.46828	1	RXN-15578_r	4.00478	NIL	RXN-13229_f	3.89325	2	RXN-12234_r	4.56142	NIL	RXN-7854	4.53221	1	UDP-NACMURALGLDAPLIG-RXN	4.57314	6	RXN-19731	4.59943	3	RXN0-304	4.79299	NIL	2.4.1.150-RXN	4.51532	2	AICARTRANSFORM-RXN_r	4.04906	2	RXN-17532	7.99406	NIL	3.4.17.11-RXN	6.83993	3	CERAMIDASE-RXN
	RXN-11518	5.28007	1	RXN-11518	5.28007	1	RXN-16112	9.59544	1	RXN-12559	8.06659	1	RXN-17340	7.46901	1	RXN-13020_f	4.0054	NIL	RXN-13229_r	3.89325	2	PRPPAMIDOTRANS-RXN_f	4.56241	2	RXN-19973	4.53346	NIL	RXN-16474	4.57458	3	ADENOSINE-TETRAPHOSPHATASE-RXN	4.59984	3	DAPASYN-RXN_f	4.79634	2	RXN-12101	4.516	5	RXN-18360	4.04974	5	RXN-11027	7.99518	NIL	RXN-15682	6.84099	3	RXN-13729
	GLUTAMATESYN-RXN	5.281	1	GLUTAMATESYN-RXN	5.281	1	RXN-16950	9.60059	1	RXN-16826	8.06725	NIL	RXN-18654	7.47068	1	RXN-13020_r	4.0054	NIL	3-CH3-2-OXOBUTANOATE-OH-CH3-XFER-RXN_f	3.89577	2	PRPPAMIDOTRANS-RXN_r	4.56241	2	RXN-19177	4.53395	NIL	RXN-8771	4.57511	1	RXN-8469	4.60043	1	DAPASYN-RXN_r	4.79634	2	2.8.3.10-RXN_f	4.51604	2	RXN-21333	4.05349	NIL	UNDECAPRENYL-DIPHOSPHATASE-RXN	7.99518	3	6.3.1.9-RXN	6.84189	6	RXN-10647
	RXN-15664	5.28151	NIL	RXN-15664	5.28151	NIL	RXN-15637	9.60123	NIL	RXN-10091	8.08445	1	RXN1UA-51	7.47068	1	BETA-LYSINE-56-AMINOMUTASE-RXN_f	4.00639	5	3-CH3-2-OXOBUTANOATE-OH-CH3-XFER-RXN_r	3.89577	2	RXN-7985	4.56283	NIL	RXN3DJ-11230	4.53471	NIL	RXN-12407_f	4.57601	2	RXN-16762	4.601	NIL	RXN-22	4.79973	4	2.8.3.10-RXN_r	4.51604	2	RXN-14930_f	4.05369	2	RXN-9385	8.00117	NIL	ITACONYL-COA-HYDRATASE-RXN	6.8439	4	RXN-14355
	RXN-665	5.28239	1	RXN-665	5.28239	1	4-SULFOBENZOATE-34-DIOXYGENASE-RXN	9.61233	1	RXN0-7101_f	8.0893	NIL	RXN-18612	7.47068	1	BETA-LYSINE-56-AMINOMUTASE-RXN_r	4.00639	5	MTAMBARKMULTI-RXN_f	3.89677	NIL	RXN-19572	4.56498	3	RXN-18450	4.53482	2	RXN-12407_r	4.57601	2	RXN-7895	4.60354	NIL	RXN-17741	4.80123	3	RXN-8500	4.51899	4	RXN-14930_r	4.05369	2	RXN-20218	8.00368	2	RXN-19159	6.84418	NIL	1.20.4.2-RXN
	RXN-11511	5.28327	1	RXN-11511	5.28327	1	HYDROXYPHENYLPYRUVATE-REDUCTASE-RXN	9.61557	1	RXN0-7101_r	8.0893	NIL	RXN-18330_f	7.47084	NIL	RXN66-496	4.01022	3	MTAMBARKMULTI-RXN_r	3.89677	NIL	3.2.1.102-RXN	4.56556	3	KDPGALDOL-RXN	4.53724	4	RXN-9301	4.57698	NIL	RXN-10647	4.60367	NIL	RXN-21323	4.80226	NIL	RXN18C3-14	4.52068	3	RXN-10058	4.05385	3	RXN-7974	8.00419	1	DOLICHYLDIPHOSPHATASE-RXN_f	6.84997	3	RXN18C3-3
	RXN-13109	5.29313	1	RXN-13109	5.29313	1	RXN-15253	9.64336	1	RXN-12661	8.10704	1	RXN-18330_r	7.47084	NIL	2.6.1.7-RXN_f	4.01149	2	RXN-8635	3.89769	1	RXN-9847	4.56603	4	DEHYDDEOXPHOSGALACT-ALDOL-RXN_f	4.53724	4	RXN-13643	4.57762	1	RXN-20731	4.60516	3	RXN-8471	4.80957	2	RXN-17842	4.52093	NIL	URA-PHOSPH-RXN_f	4.05406	2	RXN-8106	8.00893	1	DOLICHYLDIPHOSPHATASE-RXN_r	6.84997	3	RXN-8469
	RXN-17364	5.29972	NIL	RXN-17364	5.29972	NIL	RXN-15254	9.64336	1	ISOPIPERITENOL-DEHYDROGENASE-RXN	8.10794	1	RXN-20435	7.49477	1	2.6.1.7-RXN_r	4.01149	2	RXN-11031	3.89858	NIL	RXN-8222	4.56952	3	DEHYDDEOXPHOSGALACT-ALDOL-RXN_r	4.53724	4	MCHMBARK-RXN_f	4.57786	3	RXN-18045	4.60607	NIL	RXN-19230	4.80969	4	RXN-16596	4.52112	NIL	URA-PHOSPH-RXN_r	4.05406	2	RXN-14478	8.00904	NIL	RXN-8106	6.85236	1	RXN-7750
	L-ARABINOSE-1-DEHYDROGENASE-RXN_f	5.31117	1	L-ARABINOSE-1-DEHYDROGENASE-RXN_f	5.31117	1	RXN-15255	9.64336	1	ALDOSE-6-PHOSPHATE-REDUCTASE-NADPH-RXN_f	8.13813	1	1.1.1.215-RXN	7.49616	1	RXN-12613	4.0128	3	RXN-9476	3.89942	4	2.4.1.45-RXN	4.57019	2	RXN-18414	4.53725	NIL	MCHMBARK-RXN_r	4.57786	3	RXN-11649	4.60664	NIL	RXN-16474	4.80998	3	RXN-12839	4.52138	5	GALPMUT-RXN_f	4.05467	5	BA7DEHYDRA-RXN	8.01059	4	RXN-11029	6.85247	2	RXN-20693
	L-ARABINOSE-1-DEHYDROGENASE-RXN_r	5.31117	1	L-ARABINOSE-1-DEHYDROGENASE-RXN_r	5.31117	1	RXN-16653	9.66211	1	ALDOSE-6-PHOSPHATE-REDUCTASE-NADPH-RXN_r	8.13813	1	GCVMULTI-RXN_f	7.49811	NIL	RXN-10246	4.01399	4	RXN-15332	3.90089	NIL	RXN-18243	4.57088	2	2.5.1.69-RXN	4.5418	2	3.5.4.27-RXN	4.58156	3	RXN-7733	4.60686	1	RXN-12529	4.8104	NIL	RXN-12840	4.52138	5	GALPMUT-RXN_r	4.05467	5	RXN-12042	8.01236	6	RETINYL-PALMITATE-ESTERASE-RXN	6.85333	3	RXN-111
	1.1.1.268-RXN	5.32888	1	1.1.1.268-RXN	5.32888	1	RXN-10133	9.66385	NIL	MANNOSE-6-PHOSPHATE-6-REDUCTASE-RXN	8.13813	1	GCVMULTI-RXN_r	7.49811	NIL	RXN-14179	4.01424	3	RXN-6423_f	3.90146	2	RXN-19255	4.57168	NIL	RXN-8731	4.5425	3	SEDOHEPTULOSE-BISPHOSPHATASE-RXN	4.58257	3	RXN-7973	4.60695	1	RXN-20575	4.8105	1	RXN-9231	4.52139	4	RXN-10465	4.05707	1	RXN-17129	8.01458	4	3.1.1.64-RXN	6.85333	3	RXN-19814
	1.1.1.269-RXN	5.32888	1	1.1.1.269-RXN	5.32888	1	RXN-11826_f	9.67139	1	DIENOYLCOAREDUCT-RXN	8.14156	1	RXN-8831	7.4986	1	RXNQT-4323	4.01458	4	RXN-6423_r	3.90146	2	RXN-13811	4.5724	3	RXN-13403	4.54503	2	2.7.7.15-RXN	4.58356	2	RXN-11133	4.60724	3	RXN-19696	4.81295	2	RXN0-5124	4.52324	2	AICARSYN-RXN_f	4.05734	4	4.3.1.14-RXN	8.02214	4	RXN-14038	6.85333	3	RXN-16903_f
	RXN-19394	5.33387	1	RXN-19394	5.33387	1	RXN-11826_r	9.67139	1	RXN-9914	8.1528	1	RXN-9353	7.50654	NIL	RXN-11861	4.01499	NIL	RXN-20702	3.90455	NIL	RXN-15790	4.57267	NIL	3.2.1.139-RXN	4.5461	3	RXN-2884	4.58401	NIL	RXN-15962	4.60741	NIL	RXN-13221	4.81709	1	RXN-21103	4.52441	NIL	AICARSYN-RXN_r	4.05734	4	RXN-18759	8.02268	3	RXN-12704	6.85335	NIL	RXN-16903_r
	RXN-19806	5.34004	NIL	RXN-19806	5.34004	NIL	RXN-9069	9.67657	NIL	1.2.1.13-RXN	8.15429	1	RXN-9352	7.50654	NIL	RXN-18344	4.01658	NIL	RXN-12895	3.91376	3	RXN-14557_f	4.57388	2	BETA-GLUCURONID-RXN	4.5461	3	1.5.4.1-RXN	4.58746	1	METHYL-COM-HTP-RXN_f	4.61058	2	2.1.1.132-RXN	4.81841	2	2.3.1.154-RXN	4.52584	2	RXN-15600	4.05747	NIL	RXN-19356	8.0227	NIL	GLUTACONYL-COA-DECARBOXYLASE-RXN	6.85347	NIL	RXN-16570
	RXN-17597	5.34661	1	RXN-17597	5.34661	1	RXN66-281	9.72324	NIL	RXN-9912	8.1563	1	RXN-21359	7.50991	NIL	RXN-17582	4.01733	4	GLYCPDIESTER-RXN	3.91438	3	RXN-14557_r	4.57388	2	RXN-9231	4.5465	4	RXN-12768_f	4.58765	2	METHYL-COM-HTP-RXN_r	4.61058	2	RXN-8178	4.81903	NIL	RXN-19051	4.52614	4	RXN-18111	4.058	NIL	RXN-20556	8.0259	3	RXN-9301	6.858	NIL	RXN0-1382_f
	RXN-13111	5.34955	1	RXN-13111	5.34955	1	RXN-9885	9.72835	1	RXN-14367	8.15891	NIL	3-HYDROXYBENZOATE-4-MONOOXYGENASE-RXN	7.51582	1	RXN0-1461	4.0186	1	RXN-14073	3.91438	3	RXN-18414	4.57415	NIL	RXN-12816	4.54704	3	RXN-12768_r	4.58765	2	RXN-16055	4.61127	4	RXN-14002	4.81958	3	RXN-15963	4.5266	NIL	RXN-18070	4.05831	NIL	RXN-15945	8.02933	2	RXN-6261	6.85999	6	RXN0-1382_r
	RXN66-546	5.36591	1	RXN66-546	5.36591	1	RXN-14466	9.73843	NIL	RXN-10094	8.16351	1	RXN-711	7.51902	NIL	RXN-14421	4.02393	2	1.97.1.2-RXN	3.91502	1	RXN-15980	4.57415	NIL	RXN-15739	4.5477	NIL	2.4.1.206-RXN	4.5879	2	RXN-15333	4.61181	NIL	RXN-18270	4.821	2	RXN18C3-12	4.52744	NIL	RXN-17517	4.05922	1	RXN-8081	8.02995	6	RXN-19897_f	6.86136	2	RXN-17138
	RXN-13110	5.36805	1	RXN-13110	5.36805	1	RXN-16801	9.74307	1	RXN-13222	8.16445	1	RXN-11516	7.54144	1	UDPACYLGLCNACDEACETYL-RXN	4.024	3	RXN-18105	3.91596	NIL	4.2.1.107-RXN_f	4.57474	4	RXN-8799	4.54803	NIL	RXN-17459	4.5884	NIL	RXN0-6575	4.61422	4	RXN-18493	4.82397	3	RXN-18420	4.52848	NIL	RXN1F-99	4.06132	NIL	RXN-20419	8.03412	NIL	RXN-19897_r	6.86136	2	RXN-20784
	RXN-1241	5.37	1	RXN-1241	5.37	1	1.8.1.5-RXN	9.7469	1	SEPIAPTERIN-REDUCTASE-RXN	8.16445	1	RXN-8053	7.56101	1	RXN-7647	4.02465	5	RXN-20067	3.91668	3	4.2.1.107-RXN_r	4.57474	4	RXN0-1461	4.55443	1	2.3.1.101-RXN_f	4.58896	2	RXN-18167	4.6153	1	RXN-13852	4.8253	1	RXN-21325	4.52883	NIL	BARBITURASE-RXN	4.06393	3	PANTEPADENYLYLTRAN-RXN	8.03535	2	FATTY-ACYL-COA-SYNTHASE-RXN	6.86231	2	RXN-18450
	RXN0-703	5.37747	1	RXN0-703	5.37747	1	RXN-8772_f	9.75024	1	RXN-1125	8.17361	1	RXN-5166	7.5802	NIL	RXN-15961	4.02641	NIL	R309-RXN	3.91719	3	RXN-19230	4.57759	4	RXN-10969	4.55632	NIL	2.3.1.101-RXN_r	4.58896	2	RXN0-5297	4.61536	NIL	RXN-19351	4.82586	2	RXN-18752_f	4.52913	5	PRENYL-PYROPHOSPHATASE-RXN	4.06397	3	RXN-12330	8.0377	5	RXN-9003	6.86497	2	RXN-13533
	RXN-1884	5.38992	1	RXN-1884	5.38992	1	RXN-8772_r	9.75024	1	RXN-14683	8.17375	NIL	#NAME?	7.5802	1	RXN-19286	4.02646	1	RXN-12316_f	3.91944	1	2.7.7.40-RXN	4.57987	2	RXN-18548	4.55697	3	RXN-10904	4.59158	NIL	RXN-19973	4.61729	NIL	RXN-7241	4.82872	3	RXN-18752_r	4.52913	5	ACSERLY-RXN	4.065	2	LACTOYL-COA-DEHYDRATASE-RXN	8.03932	4	RXN0-7075_f	6.86869	2	RXN-18295
	RXN-11965	5.39353	1	RXN-11965	5.39353	1	RXN-12078_f	9.75024	1	RXN-20140	8.17439	1	RXN-5165	7.5802	NIL	RXN-20763	4.02851	3	RXN-12316_r	3.91944	1	RXN-8766	4.581	2	UROGENIIISYN-RXN	4.5575	4	RXN-15739	4.59201	NIL	L-GLN-FRUCT-6-P-AMINOTRANS-RXN_f	4.62014	2	RXN-10942	4.82872	3	RXN-4221	4.52916	NIL	RXN-13628	4.06609	NIL	RXN-14794	8.04251	4	RXN0-7075_r	6.86869	2	GLUTATHIONE-PEROXIDASE-RXN
	1.1.1.83-RXN	5.40136	1	1.1.1.83-RXN	5.40136	1	RXN-12078_r	9.75024	1	RXN-15824	8.17439	1	#NAME?	7.5802	1	RXN-19263	4.02898	NIL	RXN66-534	3.92014	4	RXN-18070	4.58464	NIL	RXN-12790	4.55885	5	RXN-20556	4.5941	3	L-GLN-FRUCT-6-P-AMINOTRANS-RXN_r	4.62014	2	RXN-18240	4.82909	2	RXN-20351	4.52969	1	RXN0-7325	4.06664	NIL	RXN-16711	8.04282	4	COBINPGUANYLYLTRANS-RXN	6.86947	2	RXN-20581
	RXN-19748	5.40136	1	RXN-19748	5.40136	1	GLUCONATE-5-DEHYDROGENASE-RXN_f	9.75338	1	PERILLYL-ALCOHOL-DEHYDROGENASE-RXN	8.17439	1	RXN-18329_f	7.58793	NIL	RXN-13165	4.0294	1	FORMAMIDASE-RXN	3.92057	3	RXN-8286	4.58674	NIL	RXN-19261	4.55969	4	QUINOPRIBOTRANS-RXN	4.59674	2	RXN-8743	4.62035	3	RXN-10673	4.82929	2	RXN-18377	4.53077	4	1.1.3.38-RXN	4.06822	1	RXN-8813	8.04724	2	RXN-19253_f	6.87213	3	1.8.4.7-RXN
	1.1.1.39-RXN	5.40136	1	1.1.1.39-RXN	5.40136	1	GLUCONATE-5-DEHYDROGENASE-RXN_r	9.75338	1	RXN-10093	8.18114	1	RXN-18329_r	7.58793	NIL	RXN-13627	4.02973	NIL	RXN-15366	3.92596	2	RXN-17046	4.58781	NIL	RXN-19543	4.56006	3	RXN-8357	4.597	3	RXN-21248	4.62085	NIL	RXN-13938_f	4.83029	NIL	2.4.1.88-RXN	4.53357	2	RXN-10009	4.07012	2	RXN-19013	8.05149	5	RXN-19253_r	6.87213	3	1.8.4.1-RXN_f
	PYRIDOXAL-4-DEHYDROGENASE-RXN	5.40727	1	PYRIDOXAL-4-DEHYDROGENASE-RXN	5.40727	1	RXN-11970_f	9.75741	1	RXN-10095	8.18138	1	RXN-10629	7.60056	1	RXN-8677	4.03019	NIL	R141-RXN	3.92793	4	RXN-8675	4.58815	NIL	RXN18C3-14	4.56045	3	RXN-18759	4.59907	3	GART-RXN_f	4.62457	2	RXN-13938_r	4.83029	NIL	GALACTOSIDE-2-L-FUCOSYLTRANSFERASE-RXN	4.535	2	RXN-18697_f	4.07131	NIL	RXN-16130	8.0527	4	2.8.3.17-RXN	6.87293	2	1.8.4.1-RXN_r
	RXN-18464	5.41308	NIL	RXN-18464	5.41308	NIL	RXN-11970_r	9.75741	1	RXN-16802	8.19291	1	NADPH-DEHYDROGENASE-FLAVIN-RXN	7.60253	1	RXN-12515	4.03035	3	3.4.21.54-RXN	3.93083	3	RXN-7947	4.5882	5	CPM-KDOSYNTH-RXN	4.56186	2	RXN-15930	4.59925	NIL	GART-RXN_r	4.62457	2	RXN-12319	4.83072	2	RXN-15967	4.53543	NIL	RXN-18697_r	4.07131	NIL	TRANS-HEXAPRENYLTRANSTRANSFERASE-RXN	8.05464	2	RXN-17238	6.88132	NIL	MALYL-COA-LYASE-RXN_f
	RXN-9878	5.41437	1	RXN-9878	5.41437	1	RXN-12000	9.76872	NIL	RXN0-7020	8.1938	1	RXN-11517	7.60297	1	RXN-5822	4.0321	3	3.4.23.15-RXN	3.93083	3	RXN3O-504	4.5893	NIL	RXN-14858	4.56448	NIL	RXN-10902	4.5993	NIL	RXN-15056	4.62634	4	DOLICHYLDIPHOSPHATASE-RXN_f	4.83452	3	RXN-21152	4.53808	NIL	UDPACYLGLCNACDEACETYL-RXN	4.07193	3	2.1.1.132-RXN	8.06179	2	RXN-20710	6.88565	6	MALYL-COA-LYASE-RXN_r
	RXN-10717	5.42368	1	RXN-10717	5.42368	1	MHPHYDROXY-RXN	9.77757	1	1.3.1.2-RXN_f	8.19441	1	RXN-15785	7.61435	NIL	RXN-13170	4.03221	NIL	RXN-16055	3.93301	4	1.21.3.1-RXN	4.58979	1	RXN-19172	4.56579	NIL	RXN-10903	4.5993	NIL	RXN-8028	4.62664	5	DOLICHYLDIPHOSPHATASE-RXN_r	4.83452	3	RXN-12150	4.5397	NIL	3.1.4.39-RXN	4.07294	3	RXN-14576	8.06188	1	RXN-20419	6.8869	NIL	2.8.3.13-RXN_f
	1.1.1.191-RXN_f	5.42368	1	1.1.1.191-RXN_f	5.42368	1	RXN-5921	9.78886	1	1.3.1.2-RXN_r	8.19441	1	RXN-18328_f	7.64149	NIL	HOMOCYSMETB12-RXN	4.03344	2	RXN66-569	3.9333	1	RXN-17737	4.5898	3	RXN-19276	4.56622	NIL	RXN-19756	4.5993	NIL	RXN-15681	4.62722	NIL	3.1.4.38-RXN	4.83593	3	RXN-18414	4.53994	NIL	RXN-10122_f	4.073	NIL	RXN-8961_f	8.0629	4	RXN-21122	6.89252	NIL	2.8.3.13-RXN_r
	1.1.1.191-RXN_r	5.42368	1	1.1.1.191-RXN_r	5.42368	1	RXN-13179	9.79089	1	1.3.1.53-RXN	8.20735	1	RXN-18328_r	7.64149	NIL	HOMOCYSMET-RXN	4.03344	2	BARBITURASE-RXN	3.9353	3	RXN-17156	4.58996	NIL	RXN-8761	4.56668	NIL	RXN-13518	4.6023	NIL	RXN-12963	4.62801	1	RXN-12718	4.83682	3	RXN-20575	4.54042	1	RXN-10122_r	4.073	NIL	RXN-8961_r	8.0629	4	RXN-17213	6.89321	NIL	RXN-19320
	RXN-14234_f	5.42799	1	RXN-14234_f	5.42799	1	RXN-16559_f	9.79119	1	RXN-9875	8.20792	1	RXN-13106	7.64983	1	RXN-15586	4.03523	NIL	UDPACYLGLCNACDEACETYL-RXN	3.93755	3	RXN-13643	4.59128	1	SUCROSE-PHOSPHORYLASE-RXN	4.56756	2	RXN-12899	4.60496	3	RXN-14361	4.62841	2	2.4.1.206-RXN	4.83816	2	RXN-20581	4.54492	1	RXN-10081_f	4.07401	5	RXN-6261	8.06963	6	2.1.1.132-RXN	6.89496	2	RXN-15912
	RXN-14234_r	5.42799	1	RXN-14234_r	5.42799	1	RXN-16559_r	9.79119	1	RXN-10740	8.24086	NIL	RXN-9409	7.65332	1	RXN-15668	4.03782	NIL	CYANAMIDE-HYDRATASE-RXN_f	3.93789	4	RXN-8169	4.5917	2	RXN-18167	4.56948	1	RXN-13274	4.60726	2	RXN-10767	4.62924	3	RXN-7854	4.83864	1	RXN-11486	4.54611	2	RXN-10081_r	4.07401	5	RXN-13824	8.07252	NIL	PANTEPADENYLYLTRAN-RXN	6.89646	2	RXN66-496
	RXN-14233	5.42799	1	RXN-14233	5.42799	1	1.1.1.211-RXN_f	9.79119	1	RXN66-478	8.24174	1	RXN-9407	7.65332	1	RXN-20979	4.03841	NIL	CYANAMIDE-HYDRATASE-RXN_r	3.93789	4	RXN-17045	4.59675	NIL	RXN-18420	4.57117	NIL	RXN-13574	4.60871	3	3-CH3-2-OXOBUTANOATE-OH-CH3-XFER-RXN_f	4.62981	2	RXN0-7066	4.83945	NIL	2.3.1.130-RXN_f	4.54635	2	RXN-15366	4.07801	2	H2PTEROATESYNTH-RXN	8.07325	2	RXN-14478	6.89735	NIL	RXN-13821
	GLUCOSE-1-DEHYDROGENASE-RXN_f	5.42799	1	GLUCOSE-1-DEHYDROGENASE-RXN_f	5.42799	1	1.1.1.211-RXN_r	9.79119	1	1.14.12.15-RXN	8.26485	1	RXN-14986	7.66005	1	RXN-18070	4.03863	NIL	3.5.2.17-RXN	3.9382	3	RXN-18484	4.5995	3	RXN-17826	4.57126	3	RXN-10001	4.60871	3	3-CH3-2-OXOBUTANOATE-OH-CH3-XFER-RXN_r	4.62981	2	RXN-18249	4.84151	2	2.3.1.130-RXN_r	4.54635	2	RXN-19328	4.08321	3	RXN-15977	8.07327	1	RXN-11027	6.90069	NIL	RXN-12914
	GLUCOSE-1-DEHYDROGENASE-RXN_r	5.42799	1	GLUCOSE-1-DEHYDROGENASE-RXN_r	5.42799	1	RXN-14271_f	9.79119	1	RXN-16304	8.27031	NIL	RXN-664	7.675	1	CHLOROCATDIOXY-RXN	4.03864	NIL	3.5.1.76-RXN_f	3.93852	3	RXN-6501	4.59958	2	RXN-13677	4.5733	3	RXN-8288	4.60873	NIL	RXN-10665	4.62989	4	3.2.1.149-RXN	4.84174	3	RXN-5469	4.54781	2	RXN-20181	4.08437	NIL	RXN-15962	8.07708	NIL	UNDECAPRENYL-DIPHOSPHATASE-RXN	6.90069	3	RXN-19323
	RIBITOL-5-PHOSPHATE-2-DEHYDROGENASE-RXN	5.42851	1	RIBITOL-5-PHOSPHATE-2-DEHYDROGENASE-RXN	5.42851	1	RXN-14271_r	9.79119	1	CINNAMYL-ALCOHOL-DEHYDROGENASE-RXN_f	8.27146	1	LINC-RXN_f	7.67586	NIL	PROPIONLACT-RXN_f	4.03958	2	3.5.1.76-RXN_r	3.93852	3	LACTOYL-COA-DEHYDRATASE-RXN	4.59992	4	RXN-16480_f	4.57615	1	RXN-18564	4.60942	2	RXN-19013	4.63353	5	6-BETA-HYDROXYHYOSCYAMINE-EPOXIDASE-RXN	4.84185	1	RXN-11078	4.55288	2	HYDROXYMANDELONITRILE-LYASE-RXN	4.08549	4	RETINYL-PALMITATE-ESTERASE-RXN	8.08159	3	1.5.4.1-RXN	6.90853	1	RXN-19324
	RXN-10057	5.42908	1	RXN-10057	5.42908	1	RXN-17777	9.79119	1	CINNAMYL-ALCOHOL-DEHYDROGENASE-RXN_r	8.27146	1	LINC-RXN_r	7.67586	NIL	PROPIONLACT-RXN_r	4.03958	2	RXN-16037_f	3.93856	NIL	RXN0-7001	4.60003	3	RXN-16480_r	4.57615	1	RXN-21122	4.60962	NIL	RXN-16056	4.63356	NIL	RXNQT-4397	4.84356	NIL	RXN-15414	4.55355	1	RXN-14671	4.08677	1	3.1.1.64-RXN	8.08159	3	RXN-9222	6.9109	2	RXN-7929_f
	LYSINE-6-DEHYDROGENASE-RXN_f	5.43081	1	LYSINE-6-DEHYDROGENASE-RXN_f	5.43081	1	RXN-17794	9.79119	1	RXN-18331_f	8.27228	NIL	RXN-2602_f	7.68371	1	LACCOA-RXN_f	4.03958	2	RXN-16037_r	3.93856	NIL	DOLICHYLDIPHOSPHATASE-RXN_f	4.60238	3	2TRANSKETO-RXN_f	4.58121	2	RXN-19294_f	4.61077	5	RXN-21211	4.63417	NIL	RXN-14355	4.84375	NIL	RXN-10672	4.55398	2	RXN-17098	4.0871	4	RXN-14038	8.08159	3	RXN18HP-6	6.92353	NIL	RXN-7929_r
	LYSINE-6-DEHYDROGENASE-RXN_r	5.43081	1	LYSINE-6-DEHYDROGENASE-RXN_r	5.43081	1	RXN-14393	9.79119	1	RXN-18331_r	8.27228	NIL	RXN-2602_r	7.68371	1	LACCOA-RXN_r	4.03958	2	RXN-5647	3.93885	3	DOLICHYLDIPHOSPHATASE-RXN_r	4.60238	3	2TRANSKETO-RXN_r	4.58121	2	RXN-19294_r	4.61077	5	RXN-15412	4.63483	NIL	RXN-12059	4.84544	3	RXN-9279	4.55487	NIL	RXNN-386_f	4.08831	5	RXN0-5393	8.08184	4	RXN-12263	6.92508	2	RXN-4221
	RXN-18393	5.43221	1	RXN-18393	5.43221	1	RXN-17786	9.79119	1	RXN-14425	8.27232	1	RXN-9794	7.68741	1	RXN-13364	4.03989	1	RXN-21278	3.94127	NIL	RXN-17238	4.6039	NIL	RXN-17519	4.58162	1	RXN-19755	4.61208	NIL	RXN-19230	4.63513	4	2.7.7.15-RXN	4.84598	2	RXN-9485	4.55564	4	RXNN-386_r	4.08831	5	GLYOHMETRANS-RXN_f	8.08198	2	RXN-9231	6.9275	4	RXN-19326
	QUINATE-5-DEHYDROGENASE-RXN	5.43421	1	QUINATE-5-DEHYDROGENASE-RXN	5.43421	1	RXN-17781	9.79119	1	RXN-8765	8.2727	1	RXN-9840	7.68741	1	1.13.11.16-RXN	4.04182	1	TIGLYLCOA-HYDROXY-RXN_f	3.94136	4	RXN-18420	4.60455	NIL	RXN-19731	4.58186	3	6.3.2.7-RXN	4.61231	6	DOLICHYLDIPHOSPHATASE-RXN_f	4.63583	3	2.4.1.228-RXN	4.84598	2	RXN-17138	4.5561	1	2.5.1.20-RXN	4.08858	2	GLYOHMETRANS-RXN_r	8.08198	2	RXN-9847	6.93348	4	RXN-8144
	RXN-8773	5.43555	1	RXN-8773	5.43555	1	TAUROPINE-DEHYDROGENASE-RXN	9.80024	1	RXN-15034	8.2727	NIL	RXN-17175_f	7.69096	1	RXN-13135	4.04294	NIL	TIGLYLCOA-HYDROXY-RXN_r	3.94136	4	RXN-20322	4.60472	NIL	RXN-20556	4.58494	3	RXN-15937	4.61448	NIL	DOLICHYLDIPHOSPHATASE-RXN_r	4.63583	3	RXN-11112	4.84863	3	RXN0-5120	4.55663	NIL	RXN-9137	4.08858	2	RXN-9301	8.08411	NIL	RXN-15962	6.93554	NIL	RXN-14546
	RXN-11712	5.44079	NIL	RXN-11712	5.44079	NIL	RXN-11394	9.805	NIL	RXN-10079	8.27398	1	RXN-17175_r	7.69096	1	RXN-15977	4.04435	1	N-ACETYLGLUCOSAMINE-DEACETYLASE-RXN_f	3.94312	3	3-CH3-2-OXOBUTANOATE-OH-CH3-XFER-RXN_f	4.60604	2	RXN-10902	4.5858	NIL	RXN-11753_f	4.61758	NIL	RXN-7082	4.63588	3	1.21.3.1-RXN	4.85315	1	RXN-17435	4.55731	4	RXN-19209	4.09039	4	RXN-12843	8.08574	5	RXN-12843	6.93771	5	RAUCAFFRICINE-BETA-GLUCOSIDASE-RXN
	ISOCITDEH-RXN_f	5.45697	1	ISOCITDEH-RXN_f	5.45697	1	RXN-13565	9.80786	NIL	1.1.1.215-RXN	8.2757	1	RXN6666-5	7.69207	1	N-CARBAMOYLSARCOSINE-AMIDASE-RXN	4.04667	3	N-ACETYLGLUCOSAMINE-DEACETYLASE-RXN_r	3.94312	3	3-CH3-2-OXOBUTANOATE-OH-CH3-XFER-RXN_r	4.60604	2	RXN-10903	4.5858	NIL	RXN-11753_r	4.61758	NIL	FRUCTOSE-6-PHOSPHATE-PHOSPHOKETOLASE-RXN	4.63816	4	RXN-11365	4.85623	3	RXN-14242	4.558	5	RXN1F-168	4.09104	1	RXN0-1461	8.08763	1	RXN-19013	6.93835	5	RXN-19298
	ISOCITDEH-RXN_r	5.45697	1	ISOCITDEH-RXN_r	5.45697	1	RXN-16949	9.8207	1	RXN-8821	8.28414	1	RXN-12072	7.69612	1	GUANIDINOBUTYRASE-RXN	4.04812	3	4-NITROPHENYLPHOSPHATASE-RXN	3.94429	3	RXN-14561	4.6069	2	RXN-12810_f	4.58836	2	RXN-17998	4.61892	NIL	RXN-16748	4.63875	2	RXN0-4361	4.85623	3	RXN-20423_f	4.5583	NIL	RXN-20092	4.09281	1	RXN-15966	8.09004	NIL	RXN-17166	6.94145	NIL	2.6.1.80-RXN_f
	RXN-15485	5.46199	NIL	RXN-15485	5.46199	NIL	RXN-17590	9.82977	1	RXN-12658	8.28506	1	RXN-19112	7.70066	NIL	RXN-16037_f	4.04855	NIL	RXN-19138	3.94506	4	RXN-9035	4.60744	NIL	RXN-12810_r	4.58836	2	12-ALPHA-L-FUCOSIDASE-RXN	4.62053	3	RXN-11716	4.63947	NIL	2.4.1.53-RXN	4.85681	2	RXN-20423_r	4.5583	NIL	RXN-292	4.09343	NIL	RXN-19604	8.09494	3	SERINE-C-PALMITOYLTRANSFERASE-RXN	6.94145	2	2.6.1.80-RXN_r
	RXN-11053	5.47004	1	RXN-11053	5.47004	1	RXN-16859	9.83911	NIL	RXN-19114	8.28893	1	RXN0-3922	7.70595	1	RXN-16037_r	4.04855	NIL	RXN3O-4157_f	3.94608	2	URPHOS-RXN_f	4.60926	2	RXN-12811_f	4.58836	2	RXN-14327	4.62139	NIL	ITACONYL-COA-HYDRATASE-RXN	4.63993	4	RXN-12263	4.8581	2	RXN-7893	4.56036	NIL	RXN-9890	4.09611	3	RXN0-7010	8.09864	1	RXN-12330	6.95514	5	CITRAMALYL-COA-LYASE-RXN
	SOLDEHYD-RXN_f	5.47495	1	SOLDEHYD-RXN_f	5.47495	1	1.8.1.12-RXN_f	9.84285	1	RXN-17808	8.30082	1	1.1.1.43-RXN	7.70928	1	RXN-8093	4.0488	1	RXN3O-4157_r	3.94608	2	URPHOS-RXN_r	4.60926	2	RXN-12811_r	4.58836	2	RXN-8282_f	4.62366	NIL	5.1.3.23-RXN	4.64203	5	RIBOFLAVINASE-RXN_f	4.85898	3	RXN-14617	4.56359	3	GLUTACONYL-COA-DECARBOXYLASE-RXN	4.09915	NIL	RXN-15414	8.10074	1	RXN-13908	6.9621	4	RXN-13231_f
	SOLDEHYD-RXN_r	5.47495	1	SOLDEHYD-RXN_r	5.47495	1	1.8.1.12-RXN_r	9.84285	1	RXN-13414	8.3033	NIL	RXN-16060_f	7.71358	1	RXN-19283	4.05053	1	CYSTEINE-LYASE-RXN	3.95049	4	RXN-8006	4.60999	NIL	RXN-15056	4.59	4	RXN-8282_r	4.62366	NIL	RXN-13729	4.64203	4	RIBOFLAVINASE-RXN_r	4.85898	3	RXN-18893	4.56374	5	RXN-12991_f	4.09998	NIL	6.3.1.9-RXN	8.10554	6	RXN-13736_f	6.96285	2	RXN-13231_r
	RXNDQC-2	5.47673	1	RXNDQC-2	5.47673	1	GAPDHSYNEC-RXN_f	9.8726	1	PYRUVATE-DEHYDROGENASE-NADP+-RXN_f	8.30573	1	RXN-16060_r	7.71358	1	RXN-16457	4.05123	NIL	RXN-19590	3.95125	3	RXN-15295	4.61097	1	RXN-11133	4.59262	3	RXN-18450	4.62391	2	RXN-7974	4.64372	1	RXN-8473	4.85926	2	RXN-9456	4.56374	5	RXN-12991_r	4.09998	NIL	3-CH3-2-OXOBUTANOATE-OH-CH3-XFER-RXN_f	8.10823	2	RXN-13736_r	6.96285	2	RXN-15012_f
	RXN-8739	5.47947	1	RXN-8739	5.47947	1	GAPDHSYNEC-RXN_r	9.8726	1	PYRUVATE-DEHYDROGENASE-NADP+-RXN_r	8.30573	1	RXN-12445	7.72876	1	RXN-9886_f	4.05384	5	RXN-11543	3.95216	3	RXN0-7092	4.61163	NIL	RXN-12028	4.5981	2	ADENOSINE-TETRAPHOSPHATASE-RXN	4.62457	3	RXN-17160	4.64403	NIL	URIDINE-NUCLEOSIDASE-RXN	4.85965	3	RXN-18977	4.56374	5	RXN-114	4.10426	NIL	3-CH3-2-OXOBUTANOATE-OH-CH3-XFER-RXN_r	8.10823	2	RXN-13803_f	6.96285	2	RXN-15012_r
	RXN1G01-63	5.48986	NIL	RXN1G01-63	5.48986	NIL	PHTHALATE-45-DIOXYGENASE-RXN	9.87677	1	RXN-19113	8.30688	NIL	RXN-9891	7.74721	1	RXN-9886_r	4.05384	5	RXN-11453	3.95259	1	RXN0-5409	4.61379	NIL	RXN0-6710	4.59914	3	3.1.1.82-RXN	4.62583	3	RXN-15414	4.64476	1	NMNNUCLEOSID-RXN	4.86248	3	RXN-13029	4.56449	4	RXN0-5214	4.10426	NIL	RXN-8799	8.10871	NIL	RXN-13803_r	6.96285	2	RXN-18420
	RXN-15484	5.49857	NIL	RXN-15484	5.49857	NIL	RXN-17790	9.87791	1	RXN-16061_f	8.30737	1	RXN-13108	7.76157	1	RXN-7886	4.05603	NIL	ITACONYL-COA-HYDRATASE-RXN	3.95454	4	RXN-14263	4.61681	3	RXN-21110	4.59946	NIL	DHBAMPLIG-RXN	4.62843	NIL	GLUTACONYL-COA-DECARBOXYLASE-RXN	4.64494	NIL	RXN-16902	4.8628	NIL	RXN-18484	4.56497	3	O-SUCCINYLBENZOATE-COA-SYN-RXN	4.10483	4	5.4.1.2-RXN_f	8.10924	5	RXN-13734	6.96285	2	RXN18C3-16
	1.1.1.264-RXN_f	5.49984	1	1.1.1.264-RXN_f	5.49984	1	RXN-14280	9.88379	1	RXN-16061_r	8.30737	1	RXN-11929	7.76833	1	RXN-16093	4.05833	NIL	HISTCYCLOHYD-RXN	3.95565	3	RXN-8220	4.61739	3	PANTEPADENYLYLTRAN-RXN	4.60003	2	LACTOYL-COA-DEHYDRATASE-RXN	4.62916	4	3.5.1.80-RXN	4.64642	3	RXN-13185	4.86406	1	RXN-14804_f	4.56694	5	RXN-5822	4.10895	3	5.4.1.2-RXN_r	8.10924	5	RXN-13735_f	6.96285	2	RXN-20571
	1.1.1.264-RXN_r	5.49984	1	1.1.1.264-RXN_r	5.49984	1	DXPREDISOM-RXN_f	9.88596	1	RXN-711	8.31619	NIL	9-FLUORENOL-DEHYDROGENASE-RXN	7.7827	1	RXN-8832	4.05913	1	RXN-15945	3.95716	2	3.4.17.14-RXN	4.61897	3	CONIFERIN-BETA-GLUCOSIDASE-RXN	4.60005	3	RXN-8450	4.63133	1	NAG6PDEACET-RXN	4.64642	3	RXN-10672	4.86472	2	RXN-14804_r	4.56694	5	RXN-18221	4.10896	NIL	RXN-20244	8.10993	NIL	RXN-13735_r	6.96285	2	RXN-20572
	RXN-8819	5.52196	1	RXN-8819	5.52196	1	DXPREDISOM-RXN_r	9.88596	1	RXN-18654	8.31767	1	RXN-10855	7.78303	NIL	RXN-19595	4.06043	3	RXN0-3543	3.9574	NIL	RXN0-1461	4.62286	1	QUINOPRIBOTRANS-RXN	4.60041	2	RXN-15333	4.63277	NIL	RXN-16750	4.64856	2	UDPMANACATRANS-RXN	4.86586	2	RXN0-5227	4.56797	3	RXN-14334	4.1092	NIL	HEMN-RXN	8.11105	1	PROPIONATE-COA-TRANSFERASE-RXN_f	6.96716	2	GLUTACONATE-COA-TRANSFERASE-RXN_f
	RXN-14171	5.5357	1	RXN-14171	5.5357	1	RXN-9796	9.88852	1	RXN1UA-51	8.31767	1	RXN-8014	7.79185	NIL	RXN-802	4.06092	4	RXN-15724_f	3.95752	2	RXN-11753_f	4.62463	NIL	RXN-14089	4.60113	3	RXN-13221	4.63553	1	GLUCOSE-16-BISPHOSPHATE-SYNTHASE-RXN_f	4.64912	2	RXN-20921	4.86771	NIL	RXN-21006	4.57274	4	RXN-8824	4.11224	NIL	RXN-21331	8.12366	NIL	PROPIONATE-COA-TRANSFERASE-RXN_r	6.96716	2	GLUTACONATE-COA-TRANSFERASE-RXN_r
	RXN-11740	5.54525	1	RXN-11740	5.54525	1	R23-RXN	9.89326	NIL	RXN-18612	8.31767	1	RXN-16062	7.79518	1	GLYOHMETRANS-RXN_f	4.06197	2	RXN-15724_r	3.95752	2	RXN-11753_r	4.62463	NIL	3-DEHYDROQUINATE-SYNTHASE-RXN	4.60161	4	RXN-18337	4.63587	2	GLUCOSE-16-BISPHOSPHATE-SYNTHASE-RXN_r	4.64912	2	RXN0-7001	4.86896	3	RXN-14420	4.57975	2	RXN-10035	4.11317	3	RXN-15979	8.12715	NIL	VINYLACETYL-COA-DELTA-ISOMERASE-RXN	6.96816	5	RXN-8960_f
	RXN-17728	5.5492	1	RXN-17728	5.5492	1	RXN-15051_f	9.89669	1	DCDPC-RXN	8.32081	1	RXN-21097	7.81166	NIL	GLYOHMETRANS-RXN_r	4.06197	2	RXN-15723_f	3.95752	2	RXN-15494	4.63054	NIL	3-CH3-2-OXOBUTANOATE-OH-CH3-XFER-RXN_f	4.60252	2	RXN-14900	4.63644	3	RXN-15680	4.65255	2	RXN-19572	4.86989	3	RXN-11805	4.58409	NIL	RXN-11290	4.11319	3	RXN-11351	8.12793	3	RXN-13302	6.96898	4	RXN-8960_r
	1.14.13.58-RXN	5.55267	1	1.14.13.58-RXN	5.55267	1	RXN-15051_r	9.89669	1	RXN-11513	8.32658	1	RXN-9879	7.82571	1	RXN-14999	4.06197	NIL	RXN-15723_r	3.95752	2	RXN-18180	4.63137	NIL	3-CH3-2-OXOBUTANOATE-OH-CH3-XFER-RXN_r	4.60252	2	RXN-15326	4.63658	2	RXN-16912	4.65305	NIL	RXN0-5214	4.87024	NIL	RXN-16160	4.58621	NIL	RXN-19253_f	4.1132	3	RXN-15959	8.13146	NIL	RXN-19572	6.96916	3	RXN-12751
	RXN-14641	5.55286	1	RXN-14641	5.55286	1	RXN-16860	9.89766	NIL	RXN-18330_f	8.32819	NIL	RXN-12898_f	7.8457	1	PREPHENATE-ASP-TRANSAMINE-RXN_f	4.0633	2	RXN-2364	3.96023	2	RXN-18181	4.63137	NIL	RXN-16251	4.60354	NIL	RXN-13974	4.63658	2	RXN-12722	4.65327	4	RXN-15909	4.87144	3	RXN-18841	4.58663	NIL	RXN-19253_r	4.1132	3	RXN-8766	8.13251	2	RXN-20350	6.97108	4	RXN-7985
	RXN0-5387	5.5588	NIL	RXN0-5387	5.5588	NIL	1.14.12.18-RXN	9.90554	1	RXN-18330_r	8.32819	NIL	RXN-12898_r	7.8457	1	PREPHENATE-ASP-TRANSAMINE-RXN_r	4.0633	2	RXN-17572	3.96059	3	RXN-13627	4.63342	NIL	RXN-14002	4.6058	3	RXN-11027	4.63761	NIL	RXN-15497	4.6551	NIL	RXN-19705	4.87386	2	RXN-18847	4.58663	NIL	RXN-19837	4.11423	NIL	RXN-12263	8.13461	2	RXN-15966	6.97853	NIL	RXN-15055
	RXN-5283	5.56741	NIL	RXN-5283	5.56741	NIL	1.3.1.29-RXN	9.9103	1	RXN-11679	8.32985	NIL	RXN-11493	7.84744	NIL	RXN-7884	4.06512	NIL	RXN-8930	3.96078	3	RXN-8953_f	4.63414	2	RXN-18504	4.6098	NIL	UNDECAPRENYL-DIPHOSPHATASE-RXN	4.63761	3	RXN-8675	4.65918	NIL	RXN-14865	4.87615	3	RXN18C3-15	4.58688	NIL	RXN-9579_f	4.11522	NIL	RXN-7946	8.13601	5	RXN-13323	6.98107	2	CYCLOARTENOL-SYNTHASE-RXN
	RXN-11825_f	5.57232	1	RXN-11825_f	5.57232	1	RXN-9951_f	9.91066	NIL	RXN-10078	8.3419	1	RXN-15032	7.8555	NIL	RXN-13610	4.06534	3	GUANIDINOBUTANAMIDE-NH3-RXN	3.9629	3	RXN-8953_r	4.63414	2	3.1.1.54-RXN	4.61186	3	RXN-12059	4.63891	3	SUCCINYLDIAMINOPIMTRANS-RXN	4.66001	2	RXN-19013	4.87773	5	RXN-10085	4.58714	2	RXN-9579_r	4.11522	NIL	4.3.1.4-RXN_f	8.14227	4	RXN-8813	6.98544	2	LANOSTEROL-SYNTHASE-RXN
	RXN-11825_r	5.57232	1	RXN-11825_r	5.57232	1	RXN-9951_r	9.91066	NIL	RXN-9353	8.3513	NIL	RXN-11518	7.85889	1	RXN-4161_f	4.06678	5	RXN0-1461	3.96311	1	URA-PHOSPH-RXN_f	4.63451	2	3.1.4.39-RXN	4.61345	3	RXN-11805	4.6397	NIL	RXN-8282_f	4.6605	NIL	2.4.1.210-RXN	4.88064	2	RXN-14179	4.58963	3	RXN-15264	4.11644	2	4.3.1.4-RXN_r	8.14227	4	4-ACETAMIDOBUTYRYL-COA-DEACETYLASE-RXN	6.98609	3	2.3.1.130-RXN_f
	D-ARABINITOL-4-DEHYDROGENASE-RXN	5.57232	1	D-ARABINITOL-4-DEHYDROGENASE-RXN	5.57232	1	RXN-16087	9.9146	NIL	RXN-9352	8.3513	NIL	RXN-13109	7.86061	1	RXN-4161_r	4.06678	5	RXN18HP-6	3.96684	NIL	URA-PHOSPH-RXN_r	4.63451	2	RXN-11365	4.61373	3	RXN0-5225	4.64006	3	RXN-8282_r	4.6605	NIL	RXN-13514	4.88534	NIL	RXN-9239	4.59156	1	RXN1F-167	4.11665	NIL	1.8.5.1-RXN	8.14257	1	RXN-18759	6.99913	3	2.3.1.130-RXN_r
	RIBITOL-2-DEHYDROGENASE-RXN_f	5.57232	1	RIBITOL-2-DEHYDROGENASE-RXN_f	5.57232	1	RXN0-6367	9.92639	1	RXN-11794	8.36599	NIL	1.2.1.47-RXN	7.8609	1	RXN-13230_f	4.06764	5	RXNQT-4191	3.96694	3	RXN-21122	4.64049	NIL	RXN0-4361	4.61373	3	RXN-11501	4.64077	3	QUERCETIN-23-DIOXYGENASE-RXN	4.66078	1	RXN-15497	4.88647	NIL	RXN-13185	4.59272	1	RXN-21171	4.11762	NIL	RXN-11802	8.14333	2	4.2.1.107-RXN_f	6.99913	4	RXN-12963
	RIBITOL-2-DEHYDROGENASE-RXN_r	5.57232	1	RIBITOL-2-DEHYDROGENASE-RXN_r	5.57232	1	1.14.13.63-RXN	9.93937	1	RXN-9718	8.37736	2	RXN-12151	7.87093	NIL	RXN-13230_r	4.06764	5	RXN-21082	3.96808	1	RXN-13165	4.64135	1	3.1.3.54-RXN	4.61383	3	RXN0-304	4.64092	NIL	1.8.1.15-RXN	4.66147	1	RXN-17188	4.88735	NIL	RXN-902	4.59355	NIL	RXN-942	4.1181	NIL	RXN-13852	8.14861	1	4.2.1.107-RXN_r	6.99913	4	R266-RXN
	1.1.1.13-RXN_f	5.57232	1	1.1.1.13-RXN_f	5.57232	1	RXN-9224	9.96319	1	RXN-17340	8.38383	1	RXN-12095	7.87339	1	CHOLINESTERASE-RXN	4.06873	3	RXN-12089	3.97026	1	RXN-18481	4.64422	3	5.1.3.23-RXN	4.61503	5	RXN-18217	4.64218	3	RXN-14910	4.66218	3	DHS-PHOSPHATASE-RXN	4.88802	NIL	RXN-7733	4.59509	1	RXN-9732	4.11897	NIL	RXN-10665	8.14948	4	RXN-20244	6.99916	NIL	RXN-21328
	1.1.1.13-RXN_r	5.57232	1	1.1.1.13-RXN_r	5.57232	1	RXN-15033_f	9.96975	NIL	PYRUVDEH-RXN	8.38814	NIL	SUCCGLUALDDEHYD-RXN	7.87583	1	CYTDEAM-RXN	4.07162	3	RXN-15289	3.97242	3	RXN-13872_f	4.64798	NIL	RXN-19013	4.61631	5	RXN-18218	4.64218	3	3.5.1.92-RXN	4.66275	3	RXN-13277	4.88829	2	RXN-19129	4.59657	1	RXN-19124	4.11901	4	RXN-13533	8.15116	NIL	RXN-7947	6.99996	5	RXN-18278
	D-XYLULOSE-REDUCTASE-RXN_f	5.57232	1	D-XYLULOSE-REDUCTASE-RXN_f	5.57232	1	RXN-15033_r	9.96975	NIL	RXN-21359	8.39055	NIL	RXN-9881	7.88369	1	RXN-7082	4.07169	3	RXN-9011	3.9753	1	RXN-13872_r	4.64798	NIL	RXN-19138	4.61644	4	RXN-11182	4.64218	3	RXN-11454	4.66339	1	RXN-15366	4.88874	2	RXN-8205	4.59699	NIL	RXN-13165	4.11925	1	RXN-15028	8.15336	NIL	RXN-14689	7.00274	1	RXN-11027
	D-XYLULOSE-REDUCTASE-RXN_r	5.57232	1	D-XYLULOSE-REDUCTASE-RXN_r	5.57232	1	RXN-18600	9.97083	1	1.2.1.18-RXN_f	8.40822	NIL	RXNQT-4192	7.88722	NIL	RXN-10009	4.07291	2	RXN-10910	3.97612	1	RXN-13859	4.64798	3	RXN0-3543	4.61665	NIL	RXN-8134	4.64218	3	3.1.3.54-RXN	4.66459	3	RXN-13275	4.89174	2	RXN-19800	4.59814	2	RXN-17605_f	4.12022	5	RXN-8217	8.15846	NIL	RXN-18551	7.00682	2	UNDECAPRENYL-DIPHOSPHATASE-RXN
	L-ARABINITOL-4-DEHYDROGENASE-RXN_f	5.57232	1	L-ARABINITOL-4-DEHYDROGENASE-RXN_f	5.57232	1	RXN-18601	9.97083	1	1.2.1.18-RXN_r	8.40822	NIL	RXN-16551	7.88722	1	RXN-14688	4.07314	1	ARALKYLAMINE-DEHYDROGENASE-RXN	3.97779	1	NADNUCLEOSID-RXN	4.64798	3	RXN0-313_f	4.61749	NIL	RXN-18227	4.64218	3	RXN-17459	4.66466	NIL	RXN-18307	4.89275	2	GLUTACONATE-COA-TRANSFERASE-RXN_f	4.59853	2	RXN-17605_r	4.12022	5	RXN-7894	8.16345	NIL	RXN-13824	7.00961	NIL	RXN-13423
	L-ARABINITOL-4-DEHYDROGENASE-RXN_r	5.57232	1	L-ARABINITOL-4-DEHYDROGENASE-RXN_r	5.57232	1	RXN0-4022	9.9757	1	RXN-8053	8.41356	1	RXN-16555	7.88722	1	R125-RXN_f	4.07601	2	RXN-11819	3.97806	1	RXN-19702	4.64845	2	RXN0-313_r	4.61749	NIL	RXN-18216	4.64218	3	RXN-18759	4.66585	3	RXN-13403	4.89399	2	GLUTACONATE-COA-TRANSFERASE-RXN_r	4.59853	2	ISOCHORSYN-RXN_f	4.12415	5	RXN-13323	8.166	2	RXN-21331	7.01099	NIL	RXN-11133
	1.1.1.250-RXN	5.57232	1	1.1.1.250-RXN	5.57232	1	L-GULONATE-3-DEHYDROGENASE-RXN_f	10.0055	1	RXN-5166	8.41387	NIL	RXN-5424	7.89052	1	R125-RXN_r	4.07601	2	RXN-15498	3.97837	NIL	RXN-18337	4.65007	2	RXN3O-504	4.61753	NIL	RXN-18219	4.64218	3	RXN1F-147	4.66692	5	RXN-19166	4.89416	2	RXN-16037_f	4.5988	NIL	ISOCHORSYN-RXN_r	4.12415	5	RXN-16079	8.16666	NIL	RXN-19356	7.01557	NIL	RXN-13627
	1.2.1.61-RXN	5.58368	1	1.2.1.61-RXN	5.58368	1	L-GULONATE-3-DEHYDROGENASE-RXN_r	10.0055	1	#NAME?	8.41387	1	D-LYSOPINE-DEHYDROGENASE-RXN	7.89236	1	RXN-18337	4.07972	2	2.1.4.2-RXN	3.98559	2	RXN-9988	4.65307	2	RXN-15497	4.6192	NIL	RXN-15295	4.64426	1	RXN-12790	4.66706	5	OLEATE-HYDRATASE-RXN	4.89548	4	RXN-16037_r	4.5988	NIL	RXN-10124_f	4.1251	NIL	RXN-9647	8.16666	NIL	RXN-10707	7.0159	1	CHOLOYLGLYCINE-HYDROLASE-RXN
	RXN-14054_f	5.5866	1	RXN-14054_f	5.5866	1	RXN-11264	10.0155	NIL	RXN-5165	8.41387	NIL	ACETOLACTREDUCTOISOM-RXN	7.89412	1	SUCCGLUDESUCC-RXN	4.08111	3	QUERCETIN-23-DIOXYGENASE-RXN	3.98589	1	RXN-12266_f	4.65355	NIL	RXN66-495	4.61947	1	RXN3DJ-11230	4.64677	NIL	RXN-11451_f	4.66835	1	RXN-20785	4.8966	2	RXN-19281	4.59911	5	RXN-10124_r	4.1251	NIL	RXN-16082	8.16666	NIL	5.4.1.2-RXN_f	7.02639	5	RXN-13813
	RXN-14054_r	5.5866	1	RXN-14054_r	5.5866	1	1.2.1.67-RXN	10.0219	1	#NAME?	8.41387	1	HCAMULTI-RXN	7.89687	1	CREATININASE-RXN_f	4.08336	3	RXN-12894	3.98703	3	RXN-12266_r	4.65355	NIL	RXN-15412	4.6226	NIL	UROGENIIISYN-RXN	4.64752	4	RXN-11451_r	4.66835	1	UDP-NACMUR-ALA-LIG-RXN	4.89669	6	RXN-19273	4.59911	5	RXN-8953_f	4.12715	2	RXN-9543	8.16666	2	5.4.1.2-RXN_r	7.02639	5	RXN-12758_f
	RXN-17712	5.58995	NIL	RXN-17712	5.58995	NIL	RXN-9397	10.0687	1	RXN-10891	8.41748	1	RXN-19394	7.90104	1	CREATININASE-RXN_r	4.08336	3	RXN-21276	3.98882	NIL	RXN-12812_f	4.65806	2	RXN-8631_f	4.62475	4	RXN-20921	4.64848	NIL	RXN-19328	4.67227	3	RXN-7984	4.89796	NIL	RXN-20427	4.59994	NIL	RXN-8953_r	4.12715	2	RXN-13297	8.16666	2	RXN-15959	7.03194	NIL	RXN-12758_r
	RXN-19392	5.59438	1	RXN-19392	5.59438	1	RXN-13081	10.0787	1	RXN-11516	8.41864	1	RXN-16507	7.90561	NIL	2.3.1.91-RXN	4.08338	2	RXN-1901	3.98945	3	RXN-12812_r	4.65806	2	RXN-8631_r	4.62475	4	RXN-14002	4.64963	3	RXN-19361	4.67244	2	KIEVITONE-HYDRATASE-RXN	4.89852	4	RXN-19300	4.60176	2	RXN66-569	4.12721	1	RXN-16094	8.16666	2	RXN-21196	7.0331	NIL	RXN-18414
	1.1.1.292-RXN	5.60005	1	1.1.1.292-RXN	5.60005	1	CARVEOL-DEHYDROGENASE-RXN	10.094	1	ACETALD-DEHYDROG-RXN_f	8.42056	1	GALACTITOL-2-DEHYDROGENASE-RXN	7.90904	1	CHOLINE-SULFATASE-RXN	4.08377	3	RXN-14355	3.99017	NIL	ISOMALTULOSE-SYNTHASE-RXN_f	4.65819	5	RXN-14247	4.62504	3	AIRCARBOXY-RXN_f	4.64976	4	COBINAMIDEKIN-RXN	4.67313	2	RXN-9048	4.90059	1	RXN-5463	4.60186	2	RXN-14333	4.12739	1	RXN-16081	8.16666	NIL	RXN-1101	7.03457	1	RXN-14948
	L-XYLOSE-1-DEHYDROGENASE-RXN_f	5.61187	1	L-XYLOSE-1-DEHYDROGENASE-RXN_f	5.61187	1	RXN-14367	10.1039	NIL	ACETALD-DEHYDROG-RXN_r	8.42056	1	L-IDITOL-2-DEHYDROGENASE-RXN_f	7.90904	1	URACIL-5-CARBOXYLATE-DECARBOXYLASE-RXN_f	4.08537	4	LACTOYL-COA-DEHYDRATASE-RXN	3.99046	4	ISOMALTULOSE-SYNTHASE-RXN_r	4.65819	5	RXN-9984	4.62504	3	AIRCARBOXY-RXN_r	4.64976	4	RXN-21110	4.6765	NIL	RXN-18044	4.90334	NIL	RXN-8797	4.60282	NIL	3.1.4.38-RXN	4.12815	3	RXN-13295	8.16666	2	RXN-15494	7.0352	NIL	RXN-18142
	L-XYLOSE-1-DEHYDROGENASE-RXN_r	5.61187	1	L-XYLOSE-1-DEHYDROGENASE-RXN_r	5.61187	1	RXN0-7101_f	10.112	NIL	RXN-18329_f	8.42995	NIL	L-IDITOL-2-DEHYDROGENASE-RXN_r	7.90904	1	URACIL-5-CARBOXYLATE-DECARBOXYLASE-RXN_r	4.08537	4	RXN-20165	3.99053	3	RXN-19687	4.65999	NIL	RXN-9459	4.62523	3	RXN-17516	4.65302	2	RXN-7854	4.67764	1	6.3.1.10-RXN	4.90489	6	RXN-19282	4.6031	5	RXN0-7075_f	4.1293	2	ACYLCARNITINE-HYDROLASE-RXN	8.16683	3	LACTOYL-COA-DEHYDRATASE-RXN	7.03839	4	RXN-18127
	RXN-12158	5.6244	1	RXN-12158	5.6244	1	RXN0-7101_r	10.112	NIL	RXN-18329_r	8.42995	NIL	D-IDITOL-2-DEHYDROGENASE-RXN_f	7.90904	1	PNPOXI-RXN	4.08554	1	RXN-12790	3.99084	5	RXN-14284	4.66044	2	RXN-8766	4.62534	2	RXN-20575	4.65319	1	RXN-18342	4.6779	NIL	RXN-12266_f	4.90501	NIL	RXN-20447	4.60771	NIL	RXN0-7075_r	4.1293	2	RXN-15413	8.16735	NIL	RXN-17532	7.04438	NIL	RXN-12757_f
	RXN-10423	5.63124	NIL	RXN-10423	5.63124	NIL	RXN18C3-22	10.1135	NIL	3-HYDROXYBENZOATE-4-MONOOXYGENASE-RXN	8.44353	1	D-IDITOL-2-DEHYDROGENASE-RXN_r	7.90904	1	RXN-15739	4.08718	NIL	RXN-10464	3.9917	1	RXN-20580	4.66099	1	RXN-5472	4.62641	2	RXN-9674	4.65351	3	THIAMINASE-RXN	4.6794	3	RXN-12266_r	4.90501	NIL	RXN-14948	4.60844	5	DOLICHYL-PHOSPHATASE-RXN	4.1295	3	RXN-16344	8.17123	1	RXN-16131	7.04455	1	RXN-12757_r
	RXN-8808	5.63643	NIL	RXN-8808	5.63643	NIL	RXN18C3-23	10.1135	NIL	GLYOXYLATE-DEHYDROGENASE-ACYLATING-RXN_f	8.45525	1	RXN-7644_f	7.90904	1	RXN-12024	4.08734	3	3.7.1.9-RXN	3.99174	3	RXN-18239	4.66203	2	RXN-15966	4.62808	NIL	3.1.1.78-RXN	4.65351	3	RXN-5467	4.67965	2	RXN-19188	4.90747	NIL	RXN-6321	4.60918	NIL	BETA-DIKETONE-HYDROLASE-RXN	4.13054	3	RXN-11430	8.17464	3	RXN-16709	7.04456	NIL	RXN-12320
	1.14.12.1-RXN	5.64304	1	1.14.12.1-RXN	5.64304	1	RXN-16803	10.1394	1	GLYOXYLATE-DEHYDROGENASE-ACYLATING-RXN_r	8.45525	1	RXN-7644_r	7.90904	1	RXN-9591	4.0897	2	RXN-16709	3.9936	NIL	RXN-14261_f	4.66316	2	RXN-9411	4.62875	NIL	RXN0-5363_f	4.6539	NIL	RXN-5466	4.67965	2	RXN-20645	4.90946	2	RXN-13177	4.60943	3	RXN-14118	4.13122	3	RXN-19138	8.17556	4	RXN-16710	7.04456	NIL	RXN-18893
	MALIC-NADP-RXN	5.65273	1	MALIC-NADP-RXN	5.65273	1	ALDOSE-6-PHOSPHATE-REDUCTASE-NADPH-RXN_f	10.1491	1	RXN-8831	8.4633	1	MANNITOL-2-DEHYDROGENASE-RXN	7.90904	1	RXN-15724_f	4.0914	2	RXN-16710	3.9936	NIL	RXN-14261_r	4.66316	2	RXN-9410	4.62875	NIL	RXN0-5363_r	4.6539	NIL	RXN-12723	4.67994	4	RXN-13574	4.91061	3	RXN-14562	4.61282	2	ITACONYL-COA-HYDRATASE-RXN	4.13241	4	RXN-19014	8.17684	5	RXN-18833	7.04484	NIL	RXN-9456
	RXN-5163	5.65419	1	RXN-5163	5.65419	1	ALDOSE-6-PHOSPHATE-REDUCTASE-NADPH-RXN_r	10.1491	1	RXN-9958	8.47805	1	RXN-18474	7.90904	1	RXN-15724_r	4.0914	2	RXN-16922	3.99417	NIL	RXN0-5398_f	4.66416	4	1.8.98.1-RXN	4.62995	1	RXN-9995	4.65444	2	RXN-18564	4.6818	2	RXN-10001	4.91061	3	RXN-9051	4.61901	1	RXN-21244	4.13283	NIL	RXN-16246	8.17896	2	RXN-15497	7.04862	NIL	RXN-18977
	RXN-5164	5.65419	1	RXN-5164	5.65419	1	MANNOSE-6-PHOSPHATE-6-REDUCTASE-RXN	10.1491	1	RXN-11517	8.48387	1	RXN-11827_f	7.90904	1	RXN-15723_f	4.0914	2	GLYCEROL-DEHYDRATASE-RXN	3.99418	4	RXN0-5398_r	4.66416	4	RXN-17344_f	4.63054	1	3-CH3-2-OXOBUTANOATE-OH-CH3-XFER-RXN_f	4.65839	2	HISTIDPHOS-RXN	4.68246	3	RXN1F-474	4.91105	NIL	RXN-1345	4.62219	NIL	RXN-12153	4.13502	NIL	RXN-13826	8.18401	NIL	HEMN-RXN	7.04918	1	BAI3OXO-OXRED-RXN
	RXN-19063	5.66636	1	RXN-19063	5.66636	1	RXN1YI0-11	10.1503	1	RXN-18328_f	8.48551	NIL	RXN-11827_r	7.90904	1	RXN-15723_r	4.0914	2	RXN-16474	3.99433	3	RXN-13907	4.66618	1	RXN-17344_r	4.63054	1	3-CH3-2-OXOBUTANOATE-OH-CH3-XFER-RXN_r	4.65839	2	RXN-7304	4.68449	3	RXN0-7344	4.9111	NIL	GLUTACONYL-COA-DECARBOXYLASE-RXN	4.62527	NIL	N-ACETYLDIAMINOPIMELATE-DEACETYLASE-RXN	4.13649	3	RXN-18893	8.1867	5	RXN-8766	7.05039	2	RXN-13185
	RXN-20952_f	5.6767	NIL	RXN-20952_f	5.6767	NIL	GAPOXNPHOSPHN-RXN_f	10.1599	1	RXN-18328_r	8.48551	NIL	RXN-13111	7.92222	1	RXN-8747	4.09159	NIL	RXN-13178	3.99435	1	RXN-21322	4.6669	NIL	ARGSUCCINLYA-RXN_f	4.634	4	RXN-13209	4.66024	NIL	RXN-8288	4.68756	NIL	RXN-18020	4.91432	2	RXN-11224	4.62542	2	RXN0-303_f	4.13722	NIL	RXN-9456	8.1867	5	RXN-12265	7.05207	3	RXN-11789
	RXN-20952_r	5.6767	NIL	RXN-20952_r	5.6767	NIL	GAPOXNPHOSPHN-RXN_r	10.1599	1	RXN-10629	8.48565	1	RXN-17529	7.92659	1	RXN-14930_f	4.09419	2	STYRENE-OXIDE-ISOMERASE-RXN_f	3.99495	5	RXN-17683	4.66882	NIL	ARGSUCCINLYA-RXN_r	4.634	4	RXN-19139	4.6613	NIL	METHENYLTHFCYCLOHYDRO-RXN_f	4.68836	3	RXN-20788	4.91581	3	RXN-17071	4.62695	NIL	RXN0-303_r	4.13722	NIL	RXN-18977	8.1867	5	RXN-19581	7.05208	3	RXN-15756
	RXN-1102	5.68376	1	RXN-1102	5.68376	1	RXN-1106	10.1642	1	RXN-2902	8.49478	1	RXN66-306	7.92822	1	RXN-14930_r	4.09419	2	STYRENE-OXIDE-ISOMERASE-RXN_r	3.99495	5	RXN-19895_f	4.67154	2	RXN-16225	4.63456	3	5.3.1.23-RXN_f	4.66475	5	METHENYLTHFCYCLOHYDRO-RXN_r	4.68836	3	TRANSALDOL-RXN_f	4.91623	2	RXN-12920	4.62883	NIL	RXN-15654	4.13789	NIL	RXN-8675	8.18936	NIL	RXN-16750	7.05256	2	RXN-8473
	RXN-13129	5.69682	1	RXN-13129	5.69682	1	RXN0-7020	10.1747	1	RXN-9794	8.49646	1	LEUCINE-DEHYDROGENASE-RXN	7.94375	1	4-CHLOROBENZOATE-DEHALOGENASE-RXN	4.09468	3	RXN-12765	3.99495	NIL	RXN-19895_r	4.67154	2	RXN-12674	4.63526	1	5.3.1.23-RXN_r	4.66475	5	RXN-9411	4.68948	NIL	TRANSALDOL-RXN_r	4.91623	2	RXN-18773	4.62897	2	RXN-18638_f	4.13813	2	RXN-17998	8.18963	NIL	RXN-15945	7.05379	2	RXN-16130
	25-DIOXOVALERATE-DEHYDROGENASE-RXN	5.7035	1	25-DIOXOVALERATE-DEHYDROGENASE-RXN	5.7035	1	RXN-9882	10.1783	1	RXN-9840	8.49646	1	RXN-9146	7.94589	NIL	RXN-12021	4.09498	1	LYSOPHOSPHOLIPASE-RXN	3.99588	3	BETA-ALANYL-COA-AMMONIA-LYASE-RXN_f	4.6719	4	RXN-19568	4.63624	3	LYSOPHOSPHOLIPASE-RXN	4.66477	3	RXN-9410	4.68948	NIL	RXN-12728	4.91708	NIL	ITACONYL-COA-HYDRATASE-RXN	4.63	4	RXN-18638_r	4.13813	2	THIOSULFATE--THIOL-SULFURTRANSFERASE-RXN_f	8.19049	2	RXN-13852	7.0546	1	RXN-7974
	RXN-9565	5.70683	1	RXN-9565	5.70683	1	RXN-663	10.1901	1	RXN-9409	8.52407	1	LONG-CHAIN-ALDEHYDE-DEHYDROGENASE-RXN	7.95434	1	RXN-10122_f	4.09505	NIL	RXN-9969	3.99627	2	BETA-ALANYL-COA-AMMONIA-LYASE-RXN_r	4.6719	4	RXN-15979	4.63683	NIL	RXN-9847	4.66672	4	4.3.1.4-RXN_f	4.68953	4	RXN-14979	4.91711	2	RXN-19663	4.63162	NIL	RXN-7854	4.13868	1	THIOSULFATE--THIOL-SULFURTRANSFERASE-RXN_r	8.19049	2	RXN-19014	7.05735	5	RXN-16609_f
	ALDOSE-1-DEHYDROGENASE-RXN	5.71005	1	ALDOSE-1-DEHYDROGENASE-RXN	5.71005	1	RXN-12661	10.198	1	RXN-9407	8.52407	1	RXN-18647	7.95835	NIL	RXN-10122_r	4.09505	NIL	RXN0-6452	3.99897	NIL	RXN-9310	4.67326	4	RXN-15681	4.63704	NIL	BETA-ALANYL-COA-AMMONIA-LYASE-RXN_f	4.66681	4	4.3.1.4-RXN_r	4.68953	4	RXN-8441	4.91711	3	RXN-19666	4.63162	NIL	RXN-9863	4.1399	NIL	RXN-15400_f	8.19193	NIL	RXN-18834	7.05828	NIL	RXN-16609_r
	GLUCOSE-1-DEHYDROGENASE-NAD+-RXN_f	5.71005	1	GLUCOSE-1-DEHYDROGENASE-NAD+-RXN_f	5.71005	1	1.1.1.215-RXN	10.2127	1	RXN-15785	8.52429	NIL	D-THREO-ALDOSE-1-DEHYDROGENASE-RXN_f	7.9671	1	RXN-10817	4.09518	1	RXN-19528	4.00147	NIL	4-ACETAMIDOBUTYRYL-COA-DEACETYLASE-RXN	4.67496	3	RXN-7946	4.63743	5	BETA-ALANYL-COA-AMMONIA-LYASE-RXN_r	4.66681	4	RXN-14831	4.68996	2	RXN-15962	4.91768	NIL	RXN1F-19	4.63162	4	RXN-17095	4.14012	3	RXN-15400_r	8.19193	NIL	GLUTAMIDOTRANS-RXN	7.05871	4	RXN-12103
	GLUCOSE-1-DEHYDROGENASE-NAD+-RXN_r	5.71005	1	GLUCOSE-1-DEHYDROGENASE-NAD+-RXN_r	5.71005	1	RXN-17342_f	10.2285	1	RXN-13106	8.52891	1	D-THREO-ALDOSE-1-DEHYDROGENASE-RXN_r	7.9671	1	AMINEPHEN-RXN	4.09518	1	RXN-19609	4.00274	NIL	GALACTOSIDE-2-L-FUCOSYLTRANSFERASE-RXN	4.67796	2	RXN-18337	4.63871	2	3.1.3.70-RXN	4.67039	3	2.7.7.15-RXN	4.69029	2	RXN-15966	4.91946	NIL	RXN-12001	4.63235	NIL	RXN-11261	4.1403	NIL	RXN-6321	8.19322	NIL	1.8.5.1-RXN	7.06027	1	RXN-14609
	CARNITINE-3-DEHYDROGENASE-RXN_f	5.71833	1	CARNITINE-3-DEHYDROGENASE-RXN_f	5.71833	1	RXN-17342_r	10.2285	1	1.1.1.43-RXN	8.53421	1	RXN-13110	7.97222	1	RXN-20067	4.09578	3	RXN-8244	4.00344	1	RXN-18105	4.67833	NIL	RXN-12575	4.63947	3	RXN-12728	4.6708	NIL	3.2.1.26-RXN	4.6903	NIL	RXN-19695	4.91949	2	RXN-18250	4.63279	2	RXN-8762	4.14153	2	RXN-15497	8.19391	NIL	ACYLCARNITINE-HYDROLASE-RXN	7.06158	3	RXN-16762
	CARNITINE-3-DEHYDROGENASE-RXN_r	5.71833	1	CARNITINE-3-DEHYDROGENASE-RXN_r	5.71833	1	1.2.1.13-RXN	10.2342	1	RXN-14986	8.53499	1	RXN-13262	7.97222	4	RXN-13092	4.09578	NIL	UDPKIN-RXN	4.00389	2	RXN3DJ-11230	4.68031	NIL	RXN-12550	4.63947	3	RXN0-4301	4.67116	5	RXN-10643	4.69076	4	RXN-9051	4.92266	1	ISOHEXENYLGLUTACONYL-COA-HYDRATASE-RXN	4.63717	4	RXN-11469	4.14313	3	RXN-19629	8.19641	1	RXN-21192	7.06409	NIL	RXN-9916
	1.2.1.65-RXN	5.72771	1	1.2.1.65-RXN	5.72771	1	TCCOL-RXN	10.2413	NIL	RXN-664	8.544	1	RXN-14819	7.98102	1	RXN-16824	4.09645	NIL	RXN-1025	4.007	4	RXN-15979	4.68338	NIL	RXN-12576	4.63947	3	RXN18C3-12	4.67223	NIL	RXN-12028	4.69106	2	RXN-8081	4.92295	6	RXN-19662	4.63893	NIL	RXN-19389	4.14547	1	RXN-17061	8.19965	NIL	RXN-10696	7.06853	1	RXN-15105
	RXN-20483	5.72935	1	RXN-20483	5.72935	1	RXN-11849	10.2454	1	RXN-2602_f	8.5605	1	1.14.13.84-RXN	7.98419	1	ACSERLY-RXN	4.09783	2	RXN-16910	4.00728	NIL	RXN-18684	4.68359	NIL	RXN-12579	4.63947	3	RXN-20436	4.67298	5	PHLORETIN-HYDROLASE-RXN	4.69316	3	RXN-19154	4.92338	NIL	RXN-15376_f	4.63913	2	3.8.1.7-RXN	4.14613	3	RXN-8040	8.20039	5	RXN-12914	7.06884	NIL	RXN1QP9-73
	RXN-16681	5.72962	NIL	RXN-16681	5.72962	NIL	RXN-9880	10.2573	1	RXN-2602_r	8.5605	1	RXN-12079_f	7.98589	NIL	4-PYRIDOXOLACTONASE-RXN	4.09856	3	RXN-12520	4.00779	5	SAMDECARB-RXN	4.68375	4	GLUTACONYL-COA-DECARBOXYLASE-RXN	4.63948	NIL	RXN-21088	4.67854	2	RXN-6321	4.69343	NIL	RXN-7985	4.92656	NIL	RXN-15376_r	4.63913	2	RXN-12025	4.14644	NIL	BETA-ALANYL-COA-AMMONIA-LYASE-RXN_f	8.20293	4	RXN-8799	7.07036	NIL	ERYTHRONOLIDE-SYNTHASE-RXN
	RXN-20923	5.73335	NIL	RXN-20923	5.73335	NIL	DIHYDROURACIL-DEHYDROGENASE-NAD+-RXN_f	10.2643	1	RXN-13291	8.56172	1	RXN-12079_r	7.98589	NIL	RXN-8838	4.09885	3	2.5.1.45-RXN	4.00822	2	RXN-9459	4.68483	3	RXN-21220	4.63988	3	RXN-17741	4.67941	3	RXN-15328	4.69564	NIL	RXN-14327	4.92702	NIL	RXN-18247	4.63956	2	RXN-9476	4.15041	4	BETA-ALANYL-COA-AMMONIA-LYASE-RXN_r	8.20293	4	RXN-16745_f	7.07064	2	RXN-9915
	1.5.1.25-RXN	5.74232	1	1.5.1.25-RXN	5.74232	1	DIHYDROURACIL-DEHYDROGENASE-NAD+-RXN_r	10.2643	1	LINC-RXN_f	8.5655	NIL	RXN-9877	7.99091	1	RXN-14197	4.09941	3	R311-RXN	4.00869	3	RXN-9664	4.68654	5	3.4.22.40-RXN	4.63988	3	RXN-11054	4.67967	4	RXN-18260	4.69619	2	RXN-20710	4.92706	6	RXN-14863	4.64005	3	RIBOFLAVINASE-RXN_f	4.15205	3	RXN-13403	8.20458	2	RXN-16745_r	7.07064	2	RXN-11772
	RXN66-81	5.74276	1	RXN66-81	5.74276	1	RXN-16800	10.2772	1	LINC-RXN_r	8.5655	NIL	LONG-CHAIN-ALCOHOL-DEHYDROGENASE-RXN_f	7.99292	1	RXN-9641	4.10053	NIL	RXN-10759	4.00871	3	ZEATIN-O-BETA-D-XYLOSYLTRANSFERASE-RXN_f	4.68696	2	RXN-21219	4.63988	3	RXN-21325	4.68216	NIL	RXN-15419_f	4.69644	2	RXN-18271	4.92766	2	RXN-18298	4.64118	NIL	RIBOFLAVINASE-RXN_r	4.15205	3	RXN-7733	8.20479	1	3.2.1.17-RXN	7.07854	3	RXN-17406
	RXN-12182_f	5.74653	NIL	RXN-12182_f	5.74653	NIL	RXN-16826	10.2808	NIL	RXN-16550	8.57687	1	LONG-CHAIN-ALCOHOL-DEHYDROGENASE-RXN_r	7.99292	1	RXNQT-4321	4.10209	4	RXN-14173	4.01116	3	ZEATIN-O-BETA-D-XYLOSYLTRANSFERASE-RXN_r	4.68696	2	RXN-21318	4.64	NIL	RXN66-495	4.68293	1	RXN-15419_r	4.69644	2	RXN-20436	4.92869	5	5.5.1.13-RXN	4.64193	5	RXN-10860_f	4.15222	NIL	RXN-1106	8.20541	1	RXN-8675	7.07855	NIL	ARGSUCCINLYA-RXN_f
	RXN-12182_r	5.74653	NIL	RXN-12182_r	5.74653	NIL	RXN-13222	10.2884	1	RXN0-3922	8.57727	1	RXN-10450	7.99474	1	RXN-9028_f	4.10347	2	RXN-19156	4.01303	3	RXN-20556	4.68817	3	RXN-13852	4.64127	1	RXN-13675	4.68426	3	RXN-14996	4.69729	3	RXN-16711	4.93091	4	RXN-4861	4.64193	5	RXN-10860_r	4.15222	NIL	RXN-20710	8.21005	6	RXN-20142	7.07928	NIL	ARGSUCCINLYA-RXN_r
	RXN-9350	5.74991	NIL	RXN-9350	5.74991	NIL	SEPIAPTERIN-REDUCTASE-RXN	10.2884	1	RXN-12072	8.58483	1	RXN8J2-136	8.00164	1	RXN-9028_r	4.10347	2	RXN-17832	4.01476	3	RXN-2223	4.68868	NIL	DOLICHYLDIPHOSPHATASE-RXN_f	4.64158	3	RXN-12349	4.68426	1	RXN1F-20	4.70141	6	RXN-19703	4.93114	2	RXN-8528	4.64193	5	RXN-863	4.15747	4	RXN-12723	8.21344	4	PALMITOYL-COA-HYDROLASE-RXN	7.08301	3	BADEL4OXRED-RXN_f
	RXN-9351	5.74991	NIL	RXN-9351	5.74991	NIL	RXN-11898	10.291	1	RXN-16060_f	8.59028	1	RXN1G01-63	8.00484	NIL	PROPIONATE-COA-TRANSFERASE-RXN_f	4.10359	2	RXN-14689	4.01479	1	RXN-8469	4.69094	1	DOLICHYLDIPHOSPHATASE-RXN_r	4.64158	3	4.2.1.107-RXN_f	4.6865	4	RXN66-362	4.70184	5	3.1.3.46-RXN	4.93193	3	RXN-13938_f	4.64245	NIL	RXN-8441	4.15761	3	GLUTATHIONE-PEROXIDASE-RXN	8.21376	1	RXN-10662	7.08301	NIL	BADEL4OXRED-RXN_r
	RXN-10442	5.75642	1	RXN-10442	5.75642	1	ISOPIPERITENOL-DEHYDROGENASE-RXN	10.3052	1	RXN-16060_r	8.59028	1	RXN-14472	8.02791	NIL	PROPIONATE-COA-TRANSFERASE-RXN_r	4.10359	2	URIDINE-NUCLEOSIDASE-RXN	4.01672	3	RXN0-7010	4.69126	1	RXN-17419	4.64777	NIL	4.2.1.107-RXN_r	4.6865	4	RXN-9664	4.70219	5	UDPACYLGLCNACDEACETYL-RXN	4.93231	3	RXN-13938_r	4.64245	NIL	RXN-9664	4.15844	5	RXN-11649	8.21549	NIL	RXN-20334	7.08387	4	RXN-19310
	RXN-15585	5.75865	NIL	RXN-15585	5.75865	NIL	RXN-711	10.3052	NIL	RXN-17175_f	8.60569	1	RXN-9853	8.03297	1	RXN-17830	4.10511	3	RXN-11732_f	4.01848	4	RXN-7866	4.69199	1	RXN-21339	4.64777	4	RXN-15820	4.68677	NIL	RXN-20785	4.70329	2	RXN-14420	4.93479	2	4.3.1.4-RXN_f	4.64321	4	STRICTOSIDINE-SYNTHASE-RXN	4.15867	4	RXN-9222	8.21597	2	RXN-20349	7.09012	1	RXN-1345
	GLYC3PDEHYDROGBIOSYN-RXN	5.75875	1	GLYC3PDEHYDROGBIOSYN-RXN	5.75875	1	RXN-1125	10.3128	1	RXN-17175_r	8.60569	1	1.1.1.251-RXN_f	8.03341	1	RXN-19765	4.10511	3	RXN-11732_r	4.01848	4	RXN-7855	4.69199	1	RXN-13203	4.64829	2	RXN-13865_f	4.68717	4	RXN-16457	4.70347	NIL	RXN-19139	4.93494	NIL	4.3.1.4-RXN_r	4.64321	4	RXN-9864	4.16037	NIL	RXN-16247	8.21619	4	RXN-902	7.09455	NIL	RXN-15979
	1.1.1.261-RXN	5.75875	1	1.1.1.261-RXN	5.75875	1	RXN-10091	10.3151	1	RXN0-2044_f	8.60898	1	1.1.1.251-RXN_r	8.03341	1	LINOLEATE-ISOMERASE-RXN_f	4.10664	5	RXN-11045	4.01898	1	RXN-13125	4.6946	2	RXN-14063	4.64879	2	RXN-13865_r	4.68717	4	RXN-7892	4.70834	NIL	ADENOSINE-TETRAPHOSPHATASE-RXN	4.93554	3	RXN-21323	4.64389	NIL	RXN-7589	4.16167	NIL	RXN-14421	8.21749	2	RXN-18020	7.09667	2	4.2.1.100-RXN_f
	RXN-8166	5.76391	1	RXN-8166	5.76391	1	RXN-14425	10.3577	1	RXN0-2044_r	8.60898	1	SORB6PDEHYDROG-RXN_f	8.03341	1	LINOLEATE-ISOMERASE-RXN_r	4.10664	5	ALPHA-AMINO-ACID-ESTERASE-RXN	4.02049	3	RXN-12913	4.69471	NIL	KETOLACTOSE-RXN	4.65117	3	RXN-13277	4.68793	2	THIAMIN-PYRIDINYLASE-RXN	4.70987	2	GANGLIOSIDE-GALACTOSYLTRANSFERASE-RXN	4.93948	2	RXN-2222	4.64558	NIL	RXN-13005_f	4.16371	NIL	RXN-12718	8.21798	3	RXN-11351	7.10467	3	4.2.1.100-RXN_r
	RXN-10980_f	5.77034	NIL	RXN-10980_f	5.77034	NIL	1.3.1.2-RXN_f	10.3591	1	RXN-19112	8.61342	NIL	SORB6PDEHYDROG-RXN_r	8.03341	1	RXN-10744	4.10687	1	RXN-15776	4.02049	3	RXNQT-4191	4.69653	3	METHYL-COM-HTP-RXN_f	4.65333	2	RXN-16571	4.68798	NIL	RXN0-3942	4.71353	3	RXN-5469	4.93951	2	RXN-20788	4.65026	3	RXN-13005_r	4.16371	NIL	4.2.1.100-RXN_f	8.21956	4	RXN-7974	7.10572	1	STRICTOSIDINE-BETA-GLUCOSIDASE-RXN
	RXN-10980_r	5.77034	NIL	RXN-10980_r	5.77034	NIL	1.3.1.2-RXN_r	10.3591	1	RXN-9891	8.63915	1	RXN-14054_f	8.03989	1	RXN-16202	4.10702	NIL	1.13.11.49-RXN_f	4.0279	1	12-ALPHA-L-FUCOSIDASE-RXN	4.69766	3	METHYL-COM-HTP-RXN_r	4.65333	2	RXN-19357	4.68831	NIL	RXN0-4301	4.7144	5	RXN-15502	4.93999	NIL	DAPASYN-RXN_f	4.65262	2	RXN-18229	4.16723	3	4.2.1.100-RXN_r	8.21956	4	RXN-17900	7.10607	NIL	RXN-15677
	RXN-13118	5.78083	1	RXN-13118	5.78083	1	RXN-20140	10.3635	1	RXN6666-5	8.63979	1	RXN-14054_r	8.03989	1	RXN-13423	4.10716	NIL	1.13.11.49-RXN_r	4.0279	1	RXN-8255	4.69867	NIL	RXNQT-4322	4.65356	4	RXN-10744	4.69061	1	RXN-12810_f	4.71451	2	RXN-14844	4.94058	5	DAPASYN-RXN_r	4.65262	2	2.5.1.66-RXN	4.16894	2	1.20.4.2-RXN	8.21969	1	RXN-14479	7.10838	NIL	RXN-11142
	TSMOS-RXN	5.7818	NIL	TSMOS-RXN	5.7818	NIL	RXN-15824	10.3635	1	RXN-13108	8.64527	1	R5-RXN_f	8.04038	1	RXN-8469	4.10718	1	D-ARGINASE-RXN_f	4.02993	3	RXN-18240	4.69901	2	RXN-19282	4.65431	5	RXN-15425_f	4.69115	2	RXN-12810_r	4.71451	2	RXN-15619_f	4.94079	2	RXN-10700	4.6529	2	RXN-118	4.16965	NIL	RXN-698	8.22115	1	RXN-20232	7.11349	2	RXN-13211
	RXN-16794	5.78705	1	RXN-16794	5.78705	1	PERILLYL-ALCOHOL-DEHYDROGENASE-RXN	10.3635	1	RXN-8014	8.66505	NIL	R5-RXN_r	8.04038	1	RXN-12768_f	4.10881	2	D-ARGINASE-RXN_r	4.02993	3	RXN-8073	4.70019	NIL	RXN-12991_f	4.65652	NIL	RXN-15425_r	4.69115	2	RXN-12811_f	4.71451	2	RXN-15619_r	4.94079	2	RXN-20142	4.65315	NIL	RXN-8766	4.17163	2	RXN-6383_f	8.22512	4	STEROL-O-ACYLTRANSFERASE-RXN	7.11349	2	RXN-10622
	RXN-16795	5.78705	1	RXN-16795	5.78705	1	RXN-9914	10.377	1	RXN-10855	8.67106	NIL	1.1.1.127-RXN_f	8.04247	1	RXN-12768_r	4.10881	2	RXN-16873	4.03059	NIL	2.5.1.19-RXN_f	4.70252	2	RXN-12991_r	4.65652	NIL	RXN-15400_f	4.69171	NIL	RXN-12811_r	4.71451	2	RXN-19624_f	4.94079	2	RXN-11225	4.65629	2	RXN-15734	4.1717	2	RXN-6383_r	8.22512	4	RXN-20225	7.11349	2	RXN-17400
	RXN-8814	5.79986	1	RXN-8814	5.79986	1	RXN66-478	10.3799	1	RXN-16062	8.67924	1	1.1.1.127-RXN_r	8.04247	1	RXN-9889	4.10994	NIL	RXN-19755	4.03121	NIL	2.5.1.19-RXN_r	4.70252	2	RXN-17156	4.65681	NIL	RXN-15400_r	4.69171	NIL	RXN-14247	4.71505	3	RXN-19624_r	4.94079	2	RXN-14600	4.65663	3	RXN1F-162	4.17177	NIL	RXN-12324_f	8.22605	NIL	RXN-20233	7.11349	2	RXN-17416
	6-HYDROXYHEXANOATE-OXIDATION-RXN	5.80124	1	6-HYDROXYHEXANOATE-OXIDATION-RXN	5.80124	1	RXN-9912	10.3813	1	GALACTITOL-2-DEHYDROGENASE-RXN	8.68873	1	MANNITOL-2-DEHYDROGENASE-NADP+-RXN_f	8.04263	1	RXN-803	4.1101	4	RXN-14514	4.0314	NIL	RXN-16457	4.7045	NIL	RXN-17373	4.65775	4	RXN-14400	4.69313	2	RXN-9984	4.71505	3	RXN-13274	4.94144	2	OLEATE-HYDRATASE-RXN	4.65994	4	RXN-13423	4.17231	NIL	RXN-12324_r	8.22605	NIL	RXN-20231	7.11349	2	RXN-10042
	RXN-16798	5.80367	1	RXN-16798	5.80367	1	1.3.1.53-RXN	10.3916	1	L-IDITOL-2-DEHYDROGENASE-RXN_f	8.68873	1	MANNITOL-2-DEHYDROGENASE-NADP+-RXN_r	8.04263	1	CARBOXYCYCLOHEXADIENYL-DEHYDRATASE-RXN	4.11103	4	RXN-11730	4.03211	3	GLYOHMETRANS-RXN_f	4.70595	2	RXN-9140	4.65775	4	RXN-6687	4.69316	2	2.1.1.132-RXN	4.71534	2	RXN-10744	4.94158	1	TROPINESTERASE-RXN	4.66617	3	MUCONOLACTONE-DELTA-ISOMERASE-RXN	4.17328	5	1.11.1.12-RXN	8.22718	1	RXN-20223	7.11349	2	RXN-13791
	RXN-8752	5.80565	1	RXN-8752	5.80565	1	RXN-10094	10.3937	1	L-IDITOL-2-DEHYDROGENASE-RXN_r	8.68873	1	1.1.1.289-RXN_f	8.04263	1	RXN-13332	4.1113	3	RXN-12266_f	4.0358	NIL	GLYOHMETRANS-RXN_r	4.70595	2	RXN-16056	4.65796	NIL	RXN-18271	4.69936	2	TRANSALDOL-RXN_f	4.71878	2	RXN-11753_f	4.94191	NIL	5.1.3.23-RXN	4.66903	5	RXN-20169	4.17511	1	RXN0-5227	8.22873	3	RXN-20229	7.11349	2	RXN-17459
	RXN0-901_f	5.80648	1	RXN0-901_f	5.80648	1	RXN-18654	10.4044	1	D-IDITOL-2-DEHYDROGENASE-RXN_f	8.68873	1	1.1.1.289-RXN_r	8.04263	1	RXN-12663	4.11237	NIL	RXN-12266_r	4.0358	NIL	RXN-7893	4.70607	NIL	RXN-3221	4.65891	5	RXN-19704	4.6995	2	TRANSALDOL-RXN_r	4.71878	2	RXN-11753_r	4.94191	NIL	RXN-18585_f	4.67238	5	RXN-17166	4.17673	NIL	RXN-11029	8.22931	2	RXN0-1461	7.11362	1	RXN-18167
	RXN0-901_r	5.80648	1	RXN0-901_r	5.80648	1	RXN1UA-51	10.4044	1	D-IDITOL-2-DEHYDROGENASE-RXN_r	8.68873	1	MALEYLACETATE-REDUCTASE-RXN	8.05049	1	ALLANTOINASE-RXN	4.11244	3	2.3.1.103-RXN	4.04279	2	ECDYSONE-OXIDASE-RXN	4.70681	1	GLYOHMETRANS-RXN_f	4.65929	2	RXN-15414	4.70193	1	RXN-20556	4.71942	3	RXN-18504	4.94298	NIL	RXN-18585_r	4.67238	5	RXN-15295	4.17919	1	RXN-15964	8.2296	NIL	RXN-17308	7.11697	2	RXN-19663
	RXN-12009	5.80753	NIL	RXN-12009	5.80753	NIL	RXN-18612	10.4044	1	RXN-7644_f	8.68873	1	RXN-8941	8.06242	NIL	RXN-10860_f	4.11319	NIL	CHOLINE-OXIDASEII-RXN	4.04299	NIL	METHYL-COM-HTP-RXN_f	4.71017	2	GLYOHMETRANS-RXN_r	4.65929	2	NMNNUCLEOSID-RXN	4.70414	3	RXN-19277	4.72025	NIL	RXN-13439	4.94575	6	RXN-7886	4.67242	NIL	1.14.11.1-RXN	4.18114	1	RXN-20693	8.23029	1	THIOSULFATE--THIOL-SULFURTRANSFERASE-RXN_f	7.11815	2	RXN-19666
	RXN-7972_f	5.81602	1	RXN-7972_f	5.81602	1	RXN-10095	10.4062	1	RXN-7644_r	8.68873	1	RXN-10781	8.07252	1	RXN-10860_r	4.11319	NIL	VALINE-PYRUVATE-AMINOTRANSFER-RXN_f	4.04454	2	METHYL-COM-HTP-RXN_r	4.71017	2	RXN-15619_f	4.66021	2	GLYOHMETRANS-RXN_f	4.70499	2	RXN-12366	4.72064	2	RXN-15794	4.94783	NIL	RXN-15055	4.67261	NIL	RXN-20419	4.18431	NIL	RXN-13532	8.23126	NIL	THIOSULFATE--THIOL-SULFURTRANSFERASE-RXN_r	7.11815	2	RXN1F-19
	RXN-7972_r	5.81602	1	RXN-7972_r	5.81602	1	RXN-10093	10.4067	1	MANNITOL-2-DEHYDROGENASE-RXN	8.68873	1	RXN-8162	8.08213	NIL	RXN-21073	4.11359	NIL	VALINE-PYRUVATE-AMINOTRANSFER-RXN_r	4.04454	2	2.4.1.88-RXN	4.71057	2	RXN-15619_r	4.66021	2	GLYOHMETRANS-RXN_r	4.70499	2	RXN-10034	4.72193	3	RXN-18105	4.94818	NIL	5.4.99.17-RXN	4.67412	5	RXN-8768	4.18538	5	3.4.24.32-RXN	8.23153	3	RXN-16711	7.12131	4	RXN-17071
	L-XYLULOSE-REDUCTASE-RXN_f	5.81602	1	L-XYLULOSE-REDUCTASE-RXN_f	5.81602	1	CINNAMYL-ALCOHOL-DEHYDROGENASE-RXN_f	10.4261	1	RXN-18474	8.68873	1	R321-RXN	8.08604	1	RXN-15414	4.11379	1	RXN-18048	4.04609	NIL	RXN-19581	4.71111	3	RXN-19624_f	4.66021	2	4-ACETAMIDOBUTYRYL-COA-DEACETYLASE-RXN	4.70533	3	RXN-15959	4.72397	NIL	RXN66-495	4.9494	1	4-ACETAMIDOBUTYRYL-COA-DEACETYLASE-RXN	4.6742	3	RXN-6321	4.18838	NIL	RXN-19229	8.23254	2	ERYTHRONOLIDE-SYNTHASE-RXN	7.12229	2	1.8.1.12-RXN_f
	L-XYLULOSE-REDUCTASE-RXN_r	5.81602	1	L-XYLULOSE-REDUCTASE-RXN_r	5.81602	1	CINNAMYL-ALCOHOL-DEHYDROGENASE-RXN_r	10.4261	1	RXN-11827_f	8.68873	1	RXN-13191	8.09413	1	RXN-13065	4.11458	1	ARGINASE-RXN_f	4.05137	3	RXN-14260_f	4.71254	2	RXN-19624_r	4.66021	2	RXN-17213	4.70597	NIL	3.5.4.27-RXN	4.72446	3	SULFATE-ADENYLYLTRANSFERASE-ADP-RXN	4.95306	2	RXN-8762	4.67443	2	RXN-12335_f	4.18952	4	RXN-9003	8.23528	2	RXN-8976	7.12354	2	1.8.1.12-RXN_r
	RXN-7971	5.81602	1	RXN-7971	5.81602	1	RXN-9353	10.427	NIL	RXN-11827_r	8.68873	1	RXN-10092	8.10208	1	RXN-10464	4.11644	1	ARGINASE-RXN_r	4.05137	3	RXN-14260_r	4.71254	2	RXN-18759	4.66048	3	RXN18C3-13	4.70623	NIL	RXN66-354	4.72513	5	RXN-9385	4.95427	NIL	RXN-13518	4.67726	NIL	RXN-12335_r	4.18952	4	RXN0-6256	8.2356	NIL	RXN-13444	7.12541	4	RXN-15064
	24-DIAMINOPENTANOATE-DEHYDROGENASE-RXN	5.82069	1	24-DIAMINOPENTANOATE-DEHYDROGENASE-RXN	5.82069	1	RXN-9352	10.427	NIL	RXN-21097	8.70904	NIL	RXN-10090	8.10208	1	RXN-12660	4.12397	NIL	RXN-2	4.05208	2	RXN66-495	4.71338	1	RXN-19290	4.66357	1	RXN-7064	4.70659	NIL	3.1.4.39-RXN	4.72523	3	3.3.2.2-RXN	4.9556	3	2.5.1.41-RXN	4.67744	2	3.4.17.13-RXN	4.18974	3	RXN-14479	8.23565	NIL	RXN0-7010	7.12635	1	RXN-19319
	RXN-20931	5.82634	1	RXN-20931	5.82634	1	RXN-1124_f	10.4272	NIL	9-FLUORENOL-DEHYDROGENASE-RXN	8.71057	1	RXN-11965	8.10241	1	RXN-14129	4.12474	3	GLUTACONYL-COA-DECARBOXYLASE-RXN	4.05263	NIL	RXN-17334	4.71437	NIL	RXN-19360	4.66427	2	RIBULOSE-BISPHOSPHATE-CARBOXYLASE-RXN	4.70785	4	RXN-15971	4.72576	NIL	RXN-16588	4.95751	NIL	RXN-18270	4.67819	2	RXN-7893	4.19067	NIL	RXN-8028	8.23582	5	RXN6666-2	7.12919	3	2.3.1.166-RXN
	2-CHLOROBENZOATE-12-DIOXYGENASE-RXN	5.82819	1	2-CHLOROBENZOATE-12-DIOXYGENASE-RXN	5.82819	1	RXN-1124_r	10.4272	NIL	RXN-9879	8.71765	1	RXN-17145	8.11948	NIL	RXN0-6708	4.12481	NIL	RXN-10758	4.05419	3	RXN-5462	4.71535	2	RXN-11649	4.66439	NIL	RXN-5469	4.7085	2	RXN-9591	4.72804	2	RXN-9584	4.95768	NIL	1.21.3.1-RXN	4.67928	1	RXN-8986	4.19237	NIL	RXN-19756	8.23594	NIL	RXN-8761	7.12923	NIL	RXN-8797
	COUMARATE-REDUCTASE-RXN_f	5.82967	1	COUMARATE-REDUCTASE-RXN_f	5.82967	1	RXN-16304	10.4311	NIL	RXN-13671_f	8.7283	1	RXN-9854	8.11974	1	RXN-19209	4.12553	4	RXN-19810	4.05448	NIL	RXN-4319	4.71907	2	RXN-15962	4.66637	NIL	SULFATE-ADENYLYLTRANSFERASE-ADP-RXN	4.70867	2	RXN-20725	4.72961	3	RXN-17373	4.96042	4	RXN-14794	4.67958	4	1TRANSKETO-RXN_f	4.19342	2	RXN-17002	8.236	NIL	RXN-19629	7.12979	1	RXN-8170
	COUMARATE-REDUCTASE-RXN_r	5.82967	1	COUMARATE-REDUCTASE-RXN_r	5.82967	1	RXN-16802	10.4321	1	RXN-13671_r	8.7283	1	RXN-18384	8.12332	1	2.7.8.23-RXN_f	4.12566	2	RXN1ZN3-9	4.05937	NIL	4.2.2.15-RXN	4.72125	4	RXN-9591	4.66717	2	3.3.2.2-RXN	4.7093	3	RXN-19590	4.73004	3	RXN-9140	4.96042	4	TRANS-OCTAPRENYLTRANSTRANSFERASE-RXN	4.68005	2	1TRANSKETO-RXN_r	4.19342	2	1.8.4.7-RXN	8.23605	1	RXN-8960_f	7.13012	4	RXN-8965
	RXN-15892	5.8317	NIL	RXN-15892	5.8317	NIL	RXN-12658	10.4462	1	RXN-11493	8.72927	NIL	RXN-12080_f	8.126	NIL	2.7.8.23-RXN_r	4.12566	2	RXN-12588	4.05943	2	RXN-16788	4.72321	3	RXN-18045	4.66839	NIL	RXN-13609_f	4.71115	4	RXN-10904	4.73143	NIL	SPHINGANINE-1-PHOSPHATE-ALDOLASE-RXN	4.9606	4	RXN-13316	4.68428	NIL	RIBOFLAVINSYNDEAM-RXN	4.19404	3	1.8.4.1-RXN_f	8.23605	1	RXN-8960_r	7.13012	4	RXN-15278
	RXN-14014	5.83966	1	RXN-14014	5.83966	1	RXN-19114	10.4509	1	1.2.1.47-RXN	8.73848	1	RXN-12080_r	8.126	NIL	RXN-8017	4.12641	NIL	RXN-10892	4.05966	2	RXN-19294_f	4.72676	5	RXN-10665	4.66968	4	RXN-13609_r	4.71115	4	GLYOHMETRANS-RXN_f	4.73192	2	RXN18C3-10	4.96381	NIL	RXN-13314	4.68428	NIL	RXN-12240	4.19493	NIL	1.8.4.1-RXN_r	8.23605	1	3.4.24.32-RXN	7.13044	3	RXN-7570
	RXN-10444	5.84283	1	RXN-10444	5.84283	1	1.14.12.15-RXN	10.4676	1	RXN-13109	8.74178	1	RXN-10717	8.13524	1	GUANIDINOPROPIONASE-RXN_f	4.12878	3	RXN-17592	4.0641	4	RXN-19294_r	4.72676	5	RXN-15680	4.66983	2	3.2.1.26-RXN	4.71299	NIL	GLYOHMETRANS-RXN_r	4.73192	2	RXN-18237	4.96532	2	RXN-15739	4.68429	NIL	RXN-17378	4.19525	NIL	RXN-12349	8.23652	1	UDPACYLGLCNACDEACETYL-RXN	7.13297	3	AICARTRANSFORM-RXN_f
	GLUTAMATE-DEHYDROGENASE-NADP+-RXN_f	5.84411	1	GLUTAMATE-DEHYDROGENASE-NADP+-RXN_f	5.84411	1	RXN-5166	10.4841	NIL	RXN-11518	8.74682	1	1.1.1.191-RXN_f	8.13524	1	GUANIDINOPROPIONASE-RXN_r	4.12878	3	RXN-15127	4.06446	3	RXN-13533	4.7291	NIL	RXN0-3942	4.671	3	2.4.1.211-RXN_f	4.71613	2	RXN-7894	4.73344	NIL	RXN-17160	4.96552	NIL	RXN-12224_f	4.68518	1	RXN-13371	4.19569	3	RXN-7893	8.2383	NIL	NACGLCTRANS-RXN_f	7.13304	2	AICARTRANSFORM-RXN_r
	GLUTAMATE-DEHYDROGENASE-NADP+-RXN_r	5.84411	1	GLUTAMATE-DEHYDROGENASE-NADP+-RXN_r	5.84411	1	#NAME?	10.4841	1	ACETOLACTREDUCTOISOM-RXN	8.75521	1	1.1.1.191-RXN_r	8.13524	1	2.7.1.121-RXN	4.12998	2	RXN-10757	4.06479	3	RXN-7946	4.73005	5	RXN-14475	4.67115	3	2.4.1.211-RXN_r	4.71613	2	RXN-13865_f	4.73438	4	RXNQT-4398	4.96589	NIL	RXN-12224_r	4.68518	1	2.7.1.121-RXN	4.19762	2	RXN1F-147	8.24058	5	NACGLCTRANS-RXN_r	7.13304	2	RXN-13277
	D-XYLOSE-1-DEHYDROGENASE-RXN	5.84628	1	D-XYLOSE-1-DEHYDROGENASE-RXN	5.84628	1	RXN-5165	10.4841	NIL	SUCCGLUALDDEHYD-RXN	8.75739	1	RXN-19622	8.13657	NIL	RXN-12991_f	4.13207	NIL	RXN-8793	4.06629	4	RXN-20669	4.73091	3	RXN-8217	4.67141	NIL	RXN-8884	4.7184	NIL	RXN-13865_r	4.73438	4	2.1.1.86-RXN_f	4.96642	2	RXN-11569	4.68756	3	RXN-18495	4.20086	2	RXN-17334	8.24149	NIL	R266-RXN	7.13361	NIL	METHENYLTHFCYCLOHYDRO-RXN_f
	HISTOLDEHYD-RXN_f	5.84772	NIL	HISTOLDEHYD-RXN_f	5.84772	NIL	#NAME?	10.4841	1	RXN-12898_f	8.75762	1	1.1.1.190-RXN	8.14098	1	RXN-12991_r	4.13207	NIL	PHOSPHONOACETALDEHYDE-HYDROLASE-RXN_f	4.06705	3	RXN0-5216	4.73321	NIL	DAPASYN-RXN_f	4.67177	2	RXN-20733	4.71851	3	RXN-7813	4.73493	2	2.1.1.86-RXN_r	4.96642	2	RXN1G-4	4.68913	2	RXN-13752	4.20178	2	RXN-16078	8.2423	NIL	RXN0-3521	7.13542	2	METHENYLTHFCYCLOHYDRO-RXN_r
	HISTOLDEHYD-RXN_r	5.84772	NIL	HISTOLDEHYD-RXN_r	5.84772	NIL	RXN-17808	10.4845	1	RXN-12898_r	8.75762	1	RXN-9408	8.14148	1	1.8.3.5-RXN	4.13298	1	PHOSPHONOACETALDEHYDE-HYDROLASE-RXN_r	4.06705	3	RXN-13166	4.7339	NIL	DAPASYN-RXN_r	4.67177	2	TRANSALDOL-RXN_f	4.71939	2	RXN-9385	4.73709	NIL	RXN-17129	4.96811	4	RXN-18772	4.6909	2	RXN1F-163	4.20179	NIL	RXN-12610	8.24265	2	RXN-15012_f	7.14176	NIL	RXN-17705
	RXN-5581	5.85031	1	RXN-5581	5.85031	1	RXN-9875	10.487	1	RXN-9881	8.76689	1	RXN-12654	8.15035	1	RXN-12001	4.13343	NIL	R125-RXN_f	4.06853	2	RXN-11792	4.73501	NIL	RXN-16055	4.67217	4	TRANSALDOL-RXN_r	4.71939	2	RXN-18273	4.7378	NIL	RXN-19167	4.96819	2	RXN-11223	4.69165	2	RXNQT-4366	4.20338	3	RXN-8966_f	8.24266	2	RXN-15012_r	7.14176	NIL	2.5.1.41-RXN
	RXN-9567	5.85126	1	RXN-9567	5.85126	1	RXN-19113	10.4892	NIL	1.2.1.27-RXN	8.76781	1	RXN-1241	8.15959	1	RXN-12089	4.14114	1	R125-RXN_r	4.06853	2	RXN-12718	4.7353	3	RXN-16748	4.67387	2	RXN-12686	4.72043	3	RXN-18247	4.74052	2	GLYOXII-RXN	4.96921	3	RXN-11788	4.69256	2	RXN-13535	4.20364	NIL	RXN-8966_r	8.24266	2	RXN-9630	7.14426	5	RXN-13340
	RXN-10446	5.85399	1	RXN-10446	5.85399	1	RXN-16061_f	10.4894	1	RXN-11213	8.76781	1	RXN-16033	8.17106	1	RXN-10103_f	4.14221	5	RXN-646	4.06925	3	RXN-19688	4.73805	NIL	S-NORLAUDANOSOLINE-SYNTHASE-RXN	4.67389	4	RXN-12357	4.7237	3	ARGSUCCINLYA-RXN_f	4.74098	4	URITRANS-RXN	4.9711	2	RXN0-7192	4.69399	6	RFFTRANS-RXN_f	4.20427	2	2.8.3.7-RXN_f	8.24266	2	RXN-15635	7.1451	2	RXN-5472
	RXN-9435	5.86022	1	RXN-9435	5.86022	1	RXN-16061_r	10.4894	1	D-LYSOPINE-DEHYDROGENASE-RXN	8.77051	1	1.3.1.64-RXN_f	8.18895	1	RXN-10103_r	4.14221	5	RXN-21333	4.06927	NIL	RXN-9991	4.73937	2	PHLORETIN-HYDROLASE-RXN	4.67394	3	RXN-13517	4.72382	NIL	ARGSUCCINLYA-RXN_r	4.74098	4	RXN-10608	4.97189	2	RXN0-5125	4.69545	2	RFFTRANS-RXN_r	4.20427	2	2.8.3.7-RXN_r	8.24266	2	RXN-16275	7.1455	2	RXN-15022
	RXN-9395	5.86022	1	RXN-9395	5.86022	1	RXN-10079	10.49	1	RXN-15032	8.77221	NIL	1.3.1.64-RXN_r	8.18895	1	RXN-10123_f	4.14271	NIL	AGMATIN-RXN	4.07384	3	RXN-12583	4.74023	NIL	R83-RXN	4.67692	3	RXN-9231	4.72401	4	RXN-11501	4.74132	3	RXN-8286	4.97438	NIL	IGPSYN-RXN	4.69623	4	2.6.1.33-RXN_f	4.20427	2	RXN-14933_f	8.24266	2	RXN-15105	7.14593	2	METHYLMALONYL-COA-MUT-RXN_f
	RXN-9431	5.86022	1	RXN-9431	5.86022	1	RXN-14756	10.4911	1	RXN-12095	8.7757	1	RXN-16095	8.19571	1	RXN-10123_r	4.14271	NIL	RXN-11350	4.07494	2	3.4.24.32-RXN	4.74167	3	RXN-19230	4.67833	4	RXN-961	4.72466	NIL	RXN-17198	4.74172	NIL	RXN-15635	4.97668	2	RXN-9048	4.69802	1	2.6.1.33-RXN_r	4.20427	2	RXN-14933_r	8.24266	2	RXN-12969	7.14696	4	METHYLMALONYL-COA-MUT-RXN_r
	RXN-9396	5.86022	1	RXN-9396	5.86022	1	RXN-9794	10.5033	1	HCAMULTI-RXN	8.77859	1	RXN-20345	8.19571	1	RXN-16480_f	4.14458	1	RXN-12356	4.07578	3	1.8.5.1-RXN	4.7436	1	3.2.1.48-RXN	4.6796	3	RXN-12252	4.72489	3	RXN-15794	4.74449	NIL	IGPSYN-RXN	4.97752	4	RXN-13212_f	4.69803	NIL	NMNAMIDOHYDRO-RXN	4.2043	3	RXN-15805	8.24334	4	CINNAMOYL-COA-REDUCTASE-RXN	7.14729	1	RXN-7946
	RXN-5161	5.86097	1	RXN-5161	5.86097	1	RXN-9840	10.5033	1	RXN-12079_f	8.7814	NIL	RXN-5901	8.19571	1	RXN-16480_r	4.14458	1	RXN-19339	4.07599	2	ADENOSINE-TETRAPHOSPHATASE-RXN	4.74742	3	RXN-14118	4.68595	3	RXN-8077	4.72551	NIL	RXN-14616	4.7451	3	RXN0-303_f	4.97763	NIL	RXN-13212_r	4.69803	NIL	3-CH3-2-OXOBUTANOATE-OH-CH3-XFER-RXN_f	4.20634	2	RXN-10643	8.24649	4	RXN-11802	7.14787	2	5.5.1.13-RXN
	RXN-19393	5.87568	1	RXN-19393	5.87568	1	RXN-8821	10.5045	1	RXN-12079_r	8.7814	NIL	RXN-20337	8.19571	1	RXN-16014	4.14581	NIL	RXN-18951	4.07973	1	RXN-13276	4.74764	2	RXN-21336	4.68769	4	RXN-11502	4.72891	NIL	RXN-14995	4.74605	3	RXN0-303_r	4.97763	NIL	RXN-15105	4.69928	2	3-CH3-2-OXOBUTANOATE-OH-CH3-XFER-RXN_r	4.20634	2	RXN-12265	8.24886	3	RXN0-3601	7.14825	2	RXN-4861
	PYRROLINECARBREDUCT-RXN	5.87915	1	PYRROLINECARBREDUCT-RXN	5.87915	1	DCDPC-RXN	10.5046	1	RXN-12736_f	8.78141	1	RXN-13301	8.19571	1	CATECHOL-12-DIOXYGENASE-RXN	4.14638	1	RXN-13230_f	4.08015	5	GLYOXII-RXN	4.7492	3	R10-RXN_f	4.68802	4	RXN-18773	4.73073	2	CONIFERIN-BETA-GLUCOSIDASE-RXN	4.74614	3	5.3.1.23-RXN_f	4.97902	5	LACTOYL-COA-DEHYDRATASE-RXN	4.70027	4	IMIDPHOSDEHYD-RXN	4.20844	4	RXN-1083	8.24957	4	RXN-15734	7.14949	2	RXN-8528
	ASPARTATE-SEMIALDEHYDE-DEHYDROGENASE-RXN_f	5.8823	1	ASPARTATE-SEMIALDEHYDE-DEHYDROGENASE-RXN_f	5.8823	1	RXN-18331_f	10.5086	NIL	RXN-12736_r	8.78141	1	RXN-9544	8.19571	NIL	XANTHINE-OXIDASE-RXN	4.14665	1	RXN-13230_r	4.08015	5	RXN18C3-58	4.75006	NIL	R10-RXN_r	4.68802	4	RXN66-362	4.73257	5	RXN-19282	4.74644	5	5.3.1.23-RXN_r	4.97902	5	RXN-19696	4.70124	2	RXN-8469	4.20912	1	UROPORIIIMETHYLTRANSA-RXN	8.2511	NIL	RXN-16274	7.15093	2	RXN-19604
	ASPARTATE-SEMIALDEHYDE-DEHYDROGENASE-RXN_r	5.8823	1	ASPARTATE-SEMIALDEHYDE-DEHYDROGENASE-RXN_r	5.8823	1	RXN-18331_r	10.5086	NIL	RXN-14819	8.78463	1	3-HYDROXYBUTYRYL-COA-DEHYDROGENASE-RXN	8.19571	1	RXN-18665	4.14736	2	CYSTEINE-DIOXYGENASE-RXN	4.08066	1	RXN-12154	4.75022	NIL	RXN-16750	4.68852	2	RXN-17238	4.7327	NIL	RXN-16988	4.74787	NIL	RXN-8675	4.97947	NIL	RXN-19490_f	4.70151	2	RXN-19229	4.21011	2	RXN-15502	8.25123	NIL	RXN-16498	7.15265	NIL	RXN-12839
	RXN-19061	5.8835	NIL	RXN-19061	5.8835	NIL	RXN-11679	10.5088	NIL	RXN-18647	8.78573	NIL	RXN-13299	8.19571	1	RXN-12087	4.14742	NIL	RXN-11645	4.08082	NIL	RXN-8144	4.75437	4	RXN-19264	4.68889	4	RXN-14282	4.73336	3	MCHMBARK-RXN_f	4.74796	3	4.2.1.107-RXN_f	4.97999	4	RXN-19490_r	4.70151	2	RXN-21321_f	4.21099	NIL	RXN-15722_f	8.25505	NIL	RXN-2882	7.15468	4	RXN-12840
	COLCYD-RXN_f	5.89726	NIL	COLCYD-RXN_f	5.89726	NIL	RXN-8053	10.5131	1	RXN-19394	8.78627	1	RXN-17109	8.19571	1	CYSTEINE-LYASE-RXN	4.14789	4	RXN-18154	4.08082	1	RXN18C3-59	4.75466	NIL	RXN-14616	4.68964	3	5.4.99.16-RXN_f	4.73337	5	MCHMBARK-RXN_r	4.74796	3	4.2.1.107-RXN_r	4.97999	4	RXN-14831	4.70166	2	RXN-21321_r	4.21099	NIL	RXN-15722_r	8.25505	NIL	RXN-15964	7.15608	NIL	RXN-10049
	COLCYD-RXN_r	5.89726	NIL	COLCYD-RXN_r	5.89726	NIL	RXN-13414	10.5238	NIL	D-THREO-ALDOSE-1-DEHYDROGENASE-RXN_f	8.78919	1	RXN-13279_f	8.19571	1	RXN-10970	4.14911	3	CYSTEAMINE-DIOXYGENASE-RXN	4.08353	1	RXN-17998	4.75563	NIL	OLEATE-HYDRATASE-RXN	4.68971	4	5.4.99.16-RXN_r	4.73337	5	5.3.1.23-RXN_f	4.74826	5	RXN-13908	4.9814	4	RXN-15327	4.70196	NIL	RXN-14006	4.21099	NIL	RXN0-3601	8.25675	2	RXN-13675	7.15879	3	RXN-11221
	RXN-18598	5.90181	NIL	RXN-18598	5.90181	NIL	RXN-15034	10.529	NIL	D-THREO-ALDOSE-1-DEHYDROGENASE-RXN_r	8.78919	1	RXN-13279_r	8.19571	1	RXN-4313	4.14914	NIL	RXN-14430	4.08444	1	RXN-14608	4.75565	NIL	2.1.1.131-RXN	4.69022	2	RXN0-2381_f	4.73352	4	5.3.1.23-RXN_r	4.74826	5	THIAZOLSYN2-RXN	4.98141	2	RXN-8204	4.70196	2	RXN-16194	4.21248	3	RXN-10902	8.25728	NIL	GLUTATHIONE-PEROXIDASE-RXN	7.15893	1	RXN-12847
	RXN-18599	5.90181	NIL	RXN-18599	5.90181	NIL	RXN-10078	10.5547	1	1.2.1.25-RXN	8.79128	1	RXN-16129	8.19571	1	RXN-13005_f	4.15085	NIL	RXN-15293	4.08748	NIL	4.3.1.4-RXN_f	4.75882	4	RXN-19975	4.69281	NIL	RXN0-2381_r	4.73352	4	RXN-13221	4.74873	1	RXN-18273	4.98175	NIL	2-OCTAPRENYLPHENOL-HYDROX-RXN	4.702	1	RXN-16190	4.21248	3	RXN-10903	8.25728	NIL	RXN-17206	7.1598	2	RXN-15329
	RXN-12107	5.90479	1	RXN-12107	5.90479	1	RXN-18330_f	10.559	NIL	RXN-5424	8.7931	1	RXN-20341	8.19571	1	RXN-13005_r	4.15085	NIL	3-OXOADIPATE-ENOL-LACTONASE-RXN	4.08796	3	4.3.1.4-RXN_r	4.75882	4	RXN-8288	4.69472	NIL	RXN1F-474	4.73805	NIL	RXN-16743	4.75054	NIL	RXN-2882	4.98499	4	RXN0-7344	4.70371	NIL	RXN-19574	4.21248	3	GLUTAMIDOTRANS-RXN	8.25744	4	RXN-14714_f	7.16852	5	RXN-20242
	RXN-18711	5.90535	NIL	RXN-18711	5.90535	NIL	RXN-18330_r	10.559	NIL	RXN-13111	8.80687	1	RXN-7698	8.19571	1	RXN-12520	4.15228	5	DIMETHYLGLYCINE-OXIDASE-RXN	4.09097	1	RXN-17188	4.76039	NIL	RXN-13596_f	4.69707	2	RXN-10896	4.73911	NIL	RXN-7886	4.75194	NIL	RXN-17473	4.98647	NIL	RXN-14563	4.70442	2	RXN-8665	4.21315	1	RXN-16117	8.25793	2	RXN-14714_r	7.16852	5	RXN-19800
	APIOSE-1-REDUCTASE-RXN	5.91	1	APIOSE-1-REDUCTASE-RXN	5.91	1	RXN-18329_f	10.576	NIL	RXN8J2-136	8.81375	1	RXN-13300	8.19571	1	RXN-16074	4.15307	NIL	URUR-RXN	4.09444	3	RIBOFLAVINASE-RXN_f	4.76122	3	RXN-13596_r	4.69707	2	URITRANS-RXN	4.73964	2	RXN-9401	4.75221	NIL	RXN-13609_f	4.98855	4	RXN-12349	4.70452	1	PHOSACETYLGLUCOSAMINEMUT-RXN_f	4.21347	5	RXN-20513	8.25793	2	1.20.4.2-RXN	7.16904	1	RETINYL-PALMITATE-ESTERASE-RXN
	TROPINE-DEHYDROGENASE-RXN_f	5.92196	1	TROPINE-DEHYDROGENASE-RXN_f	5.92196	1	RXN-18329_r	10.576	NIL	MANNITOL-2-DEHYDROGENASE-NADP+-RXN_f	8.81611	1	RXN-20380	8.19571	1	RXN-16823	4.15327	NIL	INDOLE-3-ACETALDEHYDE-OXIDASE-RXN	4.09663	1	RIBOFLAVINASE-RXN_r	4.76122	3	RXN-15414	4.69737	1	RXN-10969	4.73965	NIL	RXN-9400	4.75221	NIL	RXN-13609_r	4.98855	4	RXN-1083	4.70467	4	PHOSACETYLGLUCOSAMINEMUT-RXN_r	4.21347	5	RXN-13805	8.25793	2	RXN-14796	7.16945	1	3.1.1.64-RXN
	TROPINE-DEHYDROGENASE-RXN_r	5.92196	1	TROPINE-DEHYDROGENASE-RXN_r	5.92196	1	RXN-11513	10.5777	1	MANNITOL-2-DEHYDROGENASE-NADP+-RXN_r	8.81611	1	RXN-16154	8.19571	1	RXN-14632	4.15369	NIL	RXN-17741	4.09671	3	RXN-12407_f	4.76403	2	RXN-8028	4.6975	5	RXN-8106	4.74021	1	RXN-9947	4.75221	NIL	RXN0-3521	4.98962	2	RXN-19704	4.70613	2	SCYTALONE-DEHYDRATASE-RXN_f	4.21365	4	RXN-13868	8.26184	1	RXN-15055	7.1695	NIL	RXN-14038
	TROPINONE-REDUCTASE-RXN	5.92196	1	TROPINONE-REDUCTASE-RXN	5.92196	1	RXN-11794	10.6057	NIL	1.1.1.289-RXN_f	8.81611	1	RXN-19063	8.2003	1	RXN-19284	4.15469	1	HOMOCYSMETB12-RXN	4.0968	2	RXN-12407_r	4.76403	2	RXN-7893	4.69861	NIL	RXN-8441	4.74202	3	RXN-9404	4.75221	NIL	RXN-19251	4.98984	6	RIBOFLAVINASE-RXN_f	4.70693	3	SCYTALONE-DEHYDRATASE-RXN_r	4.21365	4	RXN-15494	8.26231	NIL	RXN-16021	7.17024	4	RXN-17139
	RXN-21341	5.9246	1	RXN-21341	5.9246	1	3-HYDROXYBENZOATE-4-MONOOXYGENASE-RXN	10.6084	1	1.1.1.289-RXN_r	8.81611	1	1.14.13.18-RXN	8.21285	1	RXN-10041	4.15482	3	HOMOCYSMET-RXN	4.0968	2	RXN-7974	4.76494	1	HISTIDPHOS-RXN	4.69984	3	RXN-15979	4.74304	NIL	RXN-12674	4.75251	1	RXN-15795	4.99265	NIL	RIBOFLAVINASE-RXN_r	4.70693	3	RXN-11183	4.21398	3	RXN-12963	8.26404	1	GLYOHMETRANS-RXN_f	7.17049	2	RXN-15758
	RXN0-5141	5.92684	1	RXN0-5141	5.92684	1	RXN-18328_f	10.6265	NIL	RXN-9146	8.81714	NIL	RXN-8739	8.21651	1	VICIANIN-BETA-GLUCOSIDASE-RXN	4.15977	3	RXN-21079	4.09722	4	RXN-18004	4.76621	NIL	GLUCOSAMINE-6-P-DEAMIN-RXN_f	4.70033	3	RXN-17286	4.74537	NIL	RXN-21328	4.75427	NIL	RXN-13125	4.9931	2	RXN-17177	4.70799	2	RXN-13534	4.21421	NIL	RXN-19755	8.26462	NIL	GLYOHMETRANS-RXN_r	7.17049	2	RXN-18123
	L-RHAMNOSE-1-DEHYDROGENASE-RXN_f	5.92924	1	L-RHAMNOSE-1-DEHYDROGENASE-RXN_f	5.92924	1	RXN-18328_r	10.6265	NIL	LONG-CHAIN-ALDEHYDE-DEHYDROGENASE-RXN	8.82282	1	RXN-17597	8.2224	1	RXN-19288	4.16007	1	RXN-14385	4.0996	2	RXN-15233_f	4.76621	NIL	GLUCOSAMINE-6-P-DEAMIN-RXN_r	4.70033	3	RXN-10622	4.7472	NIL	RXN-5469	4.75661	2	LYSOPHOSPHOLIPASE-RXN	4.99326	3	2.6.1.80-RXN_f	4.70877	2	RXN-21021	4.21777	NIL	RXN-12722	8.26501	4	1.11.1.12-RXN	7.17073	1	RXN-15330
	L-RHAMNOSE-1-DEHYDROGENASE-RXN_r	5.92924	1	L-RHAMNOSE-1-DEHYDROGENASE-RXN_r	5.92924	1	RXN-10891	10.6298	1	RXN-13262	8.82822	4	RXN-17403_f	8.22644	1	METHYLACYLYLCOA-HYDROXY-RXN_f	4.16179	4	RXN-18010	4.10013	3	RXN-15233_r	4.76621	NIL	RXN-13548	4.70033	NIL	3.1.4.38-RXN	4.74747	3	RXN-11261	4.75687	NIL	2.7.7.1-RXN	4.99473	2	2.6.1.80-RXN_r	4.70877	2	LACTOYL-COA-DEHYDRATASE-RXN	4.21787	4	RXN-13675	8.26691	3	RXN-16246	7.17288	2	RXN-14242
	RXN-11174	5.93551	1	RXN-11174	5.93551	1	RXN-21359	10.638	NIL	RXN-10450	8.83419	1	RXN-17403_r	8.22644	1	METHYLACYLYLCOA-HYDROXY-RXN_r	4.16179	4	RXN-17826	4.10447	3	RXN0-4841_f	4.76745	5	RXN8J2-2	4.70183	NIL	RXN-18298	4.74763	NIL	RXN-19359	4.758	2	RXN-14563	4.99536	2	PRAISOM-RXN	4.711	5	TIGLYLCOA-HYDROXY-RXN_f	4.22004	4	RXN-13210	8.2693	NIL	RXN-20693	7.17551	1	RXN-11430
	RXN-18656	5.94773	NIL	RXN-18656	5.94773	NIL	RXN-17340	10.6444	1	RXN-7790	8.83473	1	RXN-7745	8.22818	NIL	RXN-10100_f	4.16267	5	METHYLITACONATE-DELTA-ISOMERASE-RXN	4.10508	5	RXN0-4841_r	4.76745	5	RXN-7813	4.70291	2	UROPORIIIMETHYLTRANSA-RXN	4.74813	NIL	RXN-13034	4.76079	4	RXN-19662	4.99798	NIL	RXN-13627	4.71134	NIL	TIGLYLCOA-HYDROXY-RXN_r	4.22004	4	RXN-9485	8.26991	4	RXN-15400_f	7.17755	NIL	RXN-10665
	RXN-18649	5.94773	1	RXN-18649	5.94773	1	RXN-11516	10.6716	1	LEUCINE-DEHYDROGENASE-RXN	8.83973	1	RXN-10915_f	8.23202	1	RXN-10100_r	4.16267	5	CREATINASE-RXN	4.10599	3	RXN-14559	4.76999	2	RXN-12722	4.70409	4	RXN-761	4.74818	2	RXN-20784	4.76168	2	RXN-8764	4.99872	2	RXN-10902	4.7115	NIL	CYTIDEAM-RXN	4.22011	3	RXN-16274	8.27066	2	RXN-15400_r	7.17755	NIL	RXN-16249
	RXN-18657	5.94773	NIL	RXN-18657	5.94773	NIL	RXN-14986	10.6798	1	RXN-15728_f	8.84064	1	RXN-10915_r	8.23202	1	AICARSYN-RXN_f	4.16317	4	SULFATE-ADENYLYLTRANSFERASE-ADP-RXN	4.10739	2	RXN-12704	4.7712	NIL	RXN-14361	4.7041	2	DAHPSYN-RXN_f	4.74916	2	RXN-14285	4.76255	2	3.1.3.62-RXN	5.00106	3	RXN-10903	4.7115	NIL	PREPHENATE-ASP-TRANSAMINE-RXN_f	4.22072	2	RXN-16762	8.27165	NIL	COA-DISULFIDE-REDUCTASE-NADH-RXN_f	7.17921	1	RXN-18752_f
	RXN-18643	5.94773	1	RXN-18643	5.94773	1	H2-METHYLENE-THMPT-DEHYDRO-RXN_f	10.6804	1	RXN-15728_r	8.84064	1	RXN-8819	8.2369	1	AICARSYN-RXN_r	4.16317	4	NITROETHANE-OXIDASE-RXN	4.10771	1	GLYOXI-RXN_f	4.77893	4	RXN-19916_f	4.70567	4	DAHPSYN-RXN_r	4.74916	2	RXN-15425_f	4.76479	2	RXN-10946	5.00106	NIL	2.1.3.1-RXN_f	4.7117	2	PREPHENATE-ASP-TRANSAMINE-RXN_r	4.22072	2	UROGENIIISYN-RXN	8.27215	4	COA-DISULFIDE-REDUCTASE-NADH-RXN_r	7.17921	1	RXN-18752_r
	RXN-18658	5.94773	NIL	RXN-18658	5.94773	NIL	H2-METHYLENE-THMPT-DEHYDRO-RXN_r	10.6804	1	RXN-15729_f	8.84064	1	1.6.4.9-RXN	8.25065	1	RXN-16934	4.16318	NIL	RXN-21021	4.10773	NIL	GLYOXI-RXN_r	4.77893	4	RXN-19916_r	4.70567	4	RXN-16078	4.7495	NIL	RXN-15425_r	4.76479	2	3.4.17.11-RXN	5.00138	3	2.1.3.1-RXN_r	4.7117	2	RXN-20936	4.2221	NIL	RXN-18226	8.27248	3	RXN-13533	7.17978	NIL	RXN-19707
	1.1.1.291-RXN	5.95113	1	1.1.1.291-RXN	5.95113	1	1.1.1.43-RXN	10.6859	1	RXN-15729_r	8.84064	1	RXN-16652	8.25279	1	RXN-18497	4.16417	2	RXN-21171	4.10878	NIL	RXN-6321	4.77969	NIL	RXN-21211	4.70623	NIL	RXN-19543	4.75003	3	2.7.1.90-RXN_f	4.76515	2	RXN-8073	5.00161	NIL	RXN-17042	4.71245	NIL	RXN0-6984	4.22286	3	RXN-12611	8.27457	2	PRIBFAICARPISOM-RXN	7.18072	5	RXN66-281
	1.2.1.31-RXN	5.9516	1	1.2.1.31-RXN	5.9516	1	RXN-10629	10.6909	1	1.1.1.251-RXN_f	8.84114	1	RXN-16133_f	8.25626	1	3.5.5.5-RXN_f	4.16467	3	RXN-14726	4.11432	4	RXN-20575	4.78122	1	1.14.11.26-RXN	4.70783	1	RXN-18996	4.75421	2	2.7.1.90-RXN_r	4.76515	2	RXN-19581	5.00235	3	RXN-16131	4.71554	1	RXN-18496	4.22336	2	RXN-16275	8.27567	2	1.8.4.7-RXN	7.18166	1	RXN-19251
	RXN-9564	5.95416	1	RXN-9564	5.95416	1	RXN-8831	10.6918	1	1.1.1.251-RXN_r	8.84114	1	RXN-16133_r	8.25626	1	3.5.5.5-RXN_r	4.16467	3	RXN-13908	4.1159	4	RXN-13520	4.78166	NIL	RXN-8282_f	4.70821	NIL	RXN-14475	4.75463	3	RXN-20423_f	4.76641	NIL	GLYOXI-RXN_f	5.0049	4	RXN-12404	4.71604	NIL	RXN-12001	4.2244	NIL	RXN-19178	8.27581	5	1.8.4.1-RXN_f	7.18166	1	3.2.1.129-RXN
	ANHYDROTETRACYCLINE-MONOOXYGENASE-RXN	5.95511	1	ANHYDROTETRACYCLINE-MONOOXYGENASE-RXN	5.95511	1	RXN-2602_f	10.7028	1	SORB6PDEHYDROG-RXN_f	8.84114	1	RXN-20676	8.25626	1	3-OXOLAURATE-DECARBOXYLASE-RXN	4.16672	4	GLYOHMETRANS-RXN_f	4.11789	2	RXN-19755	4.78548	NIL	RXN-8282_r	4.70821	NIL	RXN-8287	4.75465	NIL	RXN-20423_r	4.76641	NIL	GLYOXI-RXN_r	5.0049	4	RXN-7894	4.71696	NIL	RXN-20735	4.22518	3	RXN-16055	8.27675	4	1.8.4.1-RXN_r	7.18166	1	RXN-12583
	GALACTOSE-1-DEHYDROGENASE-NADP+-RXN_f	5.95781	1	GALACTOSE-1-DEHYDROGENASE-NADP+-RXN_f	5.95781	1	RXN-2602_r	10.7028	1	SORB6PDEHYDROG-RXN_r	8.84114	1	RXN-16136	8.25626	NIL	RXN0-6452	4.16678	NIL	GLYOHMETRANS-RXN_r	4.11789	2	RXN-12042	4.78889	6	3.2.1.26-RXN	4.70879	NIL	RXN-4161_f	4.75507	5	RXN-7303	4.76701	3	RXN-15703	5.00663	3	RXN-12914	4.72556	NIL	2-OH-6-OXOHEPTA-2-4-DIENOATE-HYDR-RXN	4.22542	3	RXN-7984	8.27729	NIL	RXN-11975	7.18309	NIL	RXN-20349
	GALACTOSE-1-DEHYDROGENASE-NADP+-RXN_r	5.95781	1	GALACTOSE-1-DEHYDROGENASE-NADP+-RXN_r	5.95781	1	RXN-9409	10.7297	1	RXN-17529	8.84526	1	RXN-17798	8.25626	1	LUMAZINESYN-RXN	4.16685	2	RXN-19798	4.11955	NIL	RXN-13181	4.78931	3	RXN-19662	4.7096	NIL	RXN-4161_r	4.75507	5	RXN0-6710	4.76876	3	RXN-18004	5.00685	NIL	RXN-8883	4.72669	NIL	RXN-12810_f	4.22575	2	RXN-16582	8.28037	NIL	RXN-12366	7.18919	2	RXN-20423_f
	RXN-15924	5.95781	NIL	RXN-15924	5.95781	NIL	RXN-9407	10.7297	1	RXN-13110	8.85512	1	RXN-20679	8.25626	1	R310-RXN	4.16798	4	NITRILE-HYDRATASE-RXN	4.11962	4	RXN-15442	4.79045	NIL	ISOCHORMAT-RXN	4.71029	3	RXN-16966	4.75508	1	RXN-19568	4.76954	3	RXN-15233_f	5.00685	NIL	2.8.3.17-RXN	4.73003	2	RXN-12810_r	4.22575	2	RXN-17900	8.28235	NIL	4OHBENZOATE-OCTAPRENYLTRANSFER-RXN	7.1894	2	RXN-20423_r
	GLUCOSE-1-DEHYDROGENASE-NADP+-RXN	5.95781	1	GLUCOSE-1-DEHYDROGENASE-NADP+-RXN	5.95781	1	RXN-664	10.7302	1	LONG-CHAIN-ALCOHOL-DEHYDROGENASE-RXN_f	8.857	1	OHACYL-COA-DEHYDROG-RXN	8.25626	1	RXN-20702	4.16906	NIL	BETA-LYSINE-56-AMINOMUTASE-RXN_f	4.12351	5	RXN-14704	4.79095	3	RXN-17372	4.7118	4	RXN-15056	4.75551	4	RXN-6261	4.7703	6	RXN-15233_r	5.00685	NIL	2.4.1.228-RXN	4.73057	2	RXN-12811_f	4.22575	2	RXN-8761	8.28388	NIL	RXN-10706	7.19008	1	RXN-17645_f
	RXN-9442	5.95782	1	RXN-9442	5.95782	1	GALACTITOL-2-DEHYDROGENASE-RXN	10.7309	1	LONG-CHAIN-ALCOHOL-DEHYDROGENASE-RXN_r	8.857	1	RXN66-485	8.25626	NIL	RXN-18182_f	4.17026	NIL	BETA-LYSINE-56-AMINOMUTASE-RXN_r	4.12351	5	RXN-8961_f	4.79545	4	3.5.1.92-RXN	4.71188	3	RXN-10608	4.7571	2	RXN-8040	4.77149	5	RXN-19686	5.00868	NIL	RXN-20582	4.73168	1	RXN-12811_r	4.22575	2	RXN-15333	8.28423	NIL	RXN0-6256	7.19087	NIL	RXN-17645_r
	RXN-9440	5.95782	1	RXN-9440	5.95782	1	L-IDITOL-2-DEHYDROGENASE-RXN_f	10.7309	1	RXN1G01-63	8.87275	NIL	RXN-12570_f	8.25626	1	RXN-18182_r	4.17026	NIL	RXN-19390	4.12479	1	RXN-8961_r	4.79545	4	RXN-21315_f	4.71351	5	RXN-11351	4.76134	3	RXN-3221	4.77202	5	RXN-16709	5.0088	NIL	RXN-19175	4.74	NIL	RXN-18337	4.22782	2	THI-P-SYN-RXN	8.28443	2	RXN-17002	7.19305	NIL	RXN-13597
	RXN-9441	5.95782	1	RXN-9441	5.95782	1	L-IDITOL-2-DEHYDROGENASE-RXN_r	10.7309	1	RXN-9877	8.87808	1	RXN-12570_r	8.25626	1	RXN-19821	4.17062	4	RXN-17061	4.12691	NIL	URIDINE-NUCLEOSIDASE-RXN	4.79618	3	RXN-21315_r	4.71351	5	RXN-12810_f	4.7641	2	3.1.3.62-RXN	4.77227	3	RXN-16710	5.0088	NIL	RXN-19176	4.74	NIL	R365-RXN	4.22788	NIL	RXN-4303	8.28684	2	RXN-15413	7.19511	NIL	RXN-21323
	RXN-17585	5.97022	NIL	RXN-17585	5.97022	NIL	D-IDITOL-2-DEHYDROGENASE-RXN_f	10.7309	1	1.14.13.84-RXN	8.88197	1	RXN-11662_f	8.25626	1	RXN-10747	4.17098	1	RXN-20042	4.12762	NIL	RXN1F-20	4.79631	6	RXN-114	4.71475	NIL	RXN-12810_r	4.7641	2	RXN-10946	4.77227	NIL	GLUCOSE-16-BISPHOSPHATE-SYNTHASE-RXN_f	5.00917	2	RXN-11975	4.74002	NIL	RXN-14160	4.22789	3	RXN-8987	8.28759	2	RXN-13532	7.19604	NIL	RXN-13029
	RXN-9859	5.98149	1	RXN-9859	5.98149	1	D-IDITOL-2-DEHYDROGENASE-RXN_r	10.7309	1	1.1.1.127-RXN_f	8.91228	1	RXN-11662_r	8.25626	1	RXN-20068	4.17156	3	RXN-15333	4.12795	NIL	RXN0-7022	4.79747	6	RXN-13824	4.71586	NIL	RXN-12811_f	4.7641	2	RXN-16494	4.77296	NIL	GLUCOSE-16-BISPHOSPHATE-SYNTHASE-RXN_r	5.00917	2	RXN-19174	4.74086	NIL	RXN-7590	4.22871	NIL	RXN-7985	8.28766	NIL	RXN-13275	7.20078	2	RXN-13728_f
	RXN-9910	5.98662	1	RXN-9910	5.98662	1	RXN-7644_f	10.7309	1	1.1.1.127-RXN_r	8.91228	1	RXN-12507	8.25626	NIL	RXN-12407_f	4.17178	2	RXN-12575	4.12864	3	METHYLACYLYLCOA-HYDROXY-RXN_f	4.80515	4	RXN-19590	4.71844	3	RXN-12811_r	4.7641	2	RXN-19732	4.77317	3	RXN-9847	5.01385	4	RXN18HP-7	4.74086	NIL	RXN-8119	4.22871	2	STRICTOSIDINE-SYNTHASE-RXN	8.28782	4	UROPORIIIMETHYLTRANSA-RXN	7.20212	NIL	RXN-13728_r
	ERYTH4PDEHYDROG-RXN	6.00252	1	ERYTH4PDEHYDROG-RXN	6.00252	1	RXN-7644_r	10.7309	1	RXN-12080_f	8.91377	NIL	RXN-17115	8.25626	NIL	RXN-12407_r	4.17178	2	RXN-12550	4.12864	3	METHYLACYLYLCOA-HYDROXY-RXN_r	4.80515	4	2.7.1.90-RXN_f	4.71872	2	COBINPGUANYLYLTRANS-RXN	4.76472	2	RXN0-743	4.77367	5	RXN-14039	5.01501	3	RXN0-4841_f	4.74241	5	RXN-10843	4.22954	1	RXN1F-148	8.28992	5	RXN-8992	7.20337	2	RXN0-7192
	RXN-14711	6.00761	1	RXN-14711	6.00761	1	MANNITOL-2-DEHYDROGENASE-RXN	10.7309	1	RXN-12080_r	8.91377	NIL	RXN-14275	8.25626	NIL	DIHYDROCOUMARIN-LIPASE-RXN	4.17317	3	RXN-12576	4.12864	3	RXN-9992	4.80904	3	2.7.1.90-RXN_r	4.71872	2	RXN-8764	4.76812	2	RXN-7891	4.77583	NIL	RXN-12814	5.01501	3	RXN0-4841_r	4.74241	5	DXS-RXN	4.22983	2	RXN-19732	8.292	3	RXN-20351	7.20388	1	PRAISOM-RXN
	RXN0-1941	6.01338	NIL	RXN0-1941	6.01338	NIL	RXN-18474	10.7309	1	RXN-14767	8.91763	NIL	RXN-12490	8.25626	1	RXN-12610	4.17369	2	RXN-12579	4.12864	3	RXN-17380	4.81029	3	RXN-13423	4.71969	NIL	RXN-13826	4.76842	NIL	RXN-19191	4.77605	NIL	RXN0-5297	5.01501	NIL	RXN-13589	4.74366	2	RXN-13610	4.22999	3	RXN-15739	8.2937	NIL	1.21.3.1-RXN	7.20676	1	RXN-18504
	FRUCTOSE-5-DEHYDROGENASE-NADP+-RXN_f	6.01992	1	FRUCTOSE-5-DEHYDROGENASE-NADP+-RXN_f	6.01992	1	RXN-11827_f	10.7309	1	RXN-14472	8.92126	NIL	ACETOOHBUTREDUCTOISOM-RXN	8.25897	1	RXN-12068	4.17723	NIL	ACYLPHOSPHATASE-RXN	4.13032	3	RXN-12899	4.81164	3	RXN-11501	4.71984	3	RXN-15358_f	4.76852	2	RXN-18936	4.78015	3	NICONUCADENYLYLTRAN-RXN	5.0163	2	RXN-18246	4.74403	2	RXN-7897	4.2301	NIL	RXN0-6254	8.2938	2	RXN-18893	7.2099	5	RXN-13252
	FRUCTOSE-5-DEHYDROGENASE-NADP+-RXN_r	6.01992	1	FRUCTOSE-5-DEHYDROGENASE-NADP+-RXN_r	6.01992	1	RXN-11827_r	10.7309	1	R5-RXN_f	8.92172	1	RXN-19392	8.27503	1	CONIFERIN-BETA-GLUCOSIDASE-RXN	4.18017	3	RXN-11030	4.13053	NIL	3.2.1.18-RXN	4.8118	3	RXN-8287	4.72059	NIL	RXN-15358_r	4.76852	2	RXN-13677	4.78342	3	RXN-13675	5.01718	3	RXN-20580	4.74462	1	THRESYN-RXN	4.23053	4	HISTCYCLOHYD-RXN	8.29439	3	RXN-9456	7.2099	5	RXN-19294_f
	SORBOSE-5-DEHYDROGENASE-NADP+-RXN_f	6.01992	1	SORBOSE-5-DEHYDROGENASE-NADP+-RXN_f	6.01992	1	RXN-15785	10.7356	NIL	R5-RXN_r	8.92172	1	RXN-16667	8.28937	NIL	GLYCPDIESTER-RXN	4.18031	3	R608-RXN	4.13211	3	2.5.1.67-RXN	4.81183	2	QUERCETIN-23-DIOXYGENASE-RXN	4.72136	1	RXN-19174	4.76941	NIL	RXN-19378	4.78349	3	RXN-9301	5.01742	NIL	RXN-7885	4.7452	NIL	RXN-14845_f	4.23271	2	RXN-17042	8.29465	NIL	RXN-18977	7.2099	5	RXN-19294_r
	SORBOSE-5-DEHYDROGENASE-NADP+-RXN_r	6.01992	1	SORBOSE-5-DEHYDROGENASE-NADP+-RXN_r	6.01992	1	RXN-11517	10.7367	1	RXN-9853	8.92799	1	RXN-12071	8.29701	1	RXN-14073	4.18031	3	RXN-8342	4.13267	2	RXN-7733	4.81307	1	ITACONYL-COA-HYDRATASE-RXN	4.72199	4	RXN18HP-7	4.76941	NIL	RXN-9585	4.78444	NIL	AIRCARBOXY-RXN_f	5.02331	4	ERYTHRONOLIDE-SYNTHASE-RXN	4.74554	2	RXN-14845_r	4.23271	2	3.2.1.17-RXN	8.29541	3	RXN-16408	7.20995	1	RXN-19361
	L-IDONATE-2-DEHYDROGENASE-RXN	6.02799	1	L-IDONATE-2-DEHYDROGENASE-RXN	6.02799	1	RXN-13306	10.7504	1	RXN-8941	8.93711	NIL	RXNDQC-2	8.29903	1	RXN-16861	4.18085	NIL	RXN-13286_f	4.13512	NIL	RXN1G-811	4.81362	NIL	RXN1F-147	4.72479	5	RXN-16762	4.77077	NIL	RXN-15668	4.78543	NIL	AIRCARBOXY-RXN_r	5.02331	4	RXN-19897_f	4.74595	2	RXN-7708_f	4.23594	2	METHENYLTHFCYCLOHYDRO-RXN_f	8.2975	3	RXN-20333	7.21371	1	4-ACETAMIDOBUTYRYL-COA-DEACETYLASE-RXN
	RXN-10780	6.02874	1	RXN-10780	6.02874	1	RXN-14194	10.7504	1	RXN-16926	8.93801	NIL	DIAMINOPIMELATE-DEHYDROGENASE-RXN_f	8.30036	1	RXN-17609	4.18097	4	RXN-13286_r	4.13512	NIL	RXN1G-807	4.81362	NIL	LUMAZINESYN-RXN	4.72506	2	MTDMBARK-RXN_f	4.77726	1	DAPASYN-RXN_f	4.78659	2	RXN-17955	5.02401	3	RXN-19897_r	4.74595	2	RXN-7708_r	4.23594	2	METHENYLTHFCYCLOHYDRO-RXN_r	8.2975	3	RXN-16582	7.22324	NIL	RXN-14361
	4-NITROPHENOL-2-MONOOXYGENASE-RXN	6.03372	1	4-NITROPHENOL-2-MONOOXYGENASE-RXN	6.03372	1	RXN-13307	10.7504	1	MALEYLACETATE-REDUCTASE-RXN	8.95738	1	DIAMINOPIMELATE-DEHYDROGENASE-RXN_r	8.30036	1	RXN-12662	4.18535	NIL	RXN-8748	4.13768	3	RXN1G-810	4.81362	NIL	RXN-21248	4.72512	NIL	MTDMBARK-RXN_r	4.77726	1	DAPASYN-RXN_r	4.78659	2	RXN0-5409	5.02631	NIL	RXN-17067	4.74772	1	RXN-10056	4.23636	3	RXN-10644	8.2997	5	ISONOCARDICIN-SYNTHASE-RXN	7.22532	2	RXN-20241
	INDANOL-DEHYDROGENASE-RXN_f	6.03411	1	INDANOL-DEHYDROGENASE-RXN_f	6.03411	1	RXN-20382	10.7504	1	RXN-14054_f	8.96752	1	R222-RXN	8.30142	1	OXALYL-COA-DECARBOXYLASE-RXN	4.18535	4	RXN-12087	4.13932	NIL	RXN1G-809	4.81362	NIL	SUCCDIAMINOPIMDESUCC-RXN	4.72671	3	RXN-19378	4.7788	3	R83-RXN	4.78699	3	RXN-19698	5.02661	2	RXN18C3-46	4.7506	NIL	RXN-13137	4.23701	3	RXN-12704	8.3028	NIL	RXN-17844	7.22532	2	GANGLIOSIDE-GALACTOSYLTRANSFERASE-RXN
	INDANOL-DEHYDROGENASE-RXN_r	6.03411	1	INDANOL-DEHYDROGENASE-RXN_r	6.03411	1	RXN-16114	10.7504	1	RXN-14054_r	8.96752	1	RXN-18853	8.33172	1	RXN-8149	4.18953	1	5.4.99.14-RXN	4.14153	5	RXN1G-808	4.81362	NIL	RXN-19191	4.72817	NIL	RXN-9699	4.77913	2	KDO-8PPHOSPHAT-RXN	4.78813	3	RXN-20556	5.0268	3	RXN-15375	4.75463	NIL	RXN-20166	4.23818	1	1.14.20.1-RXN	8.30425	1	RXN-15103	7.22626	2	RXN-12001
	RXN-20253	6.04463	NIL	RXN-20253	6.04463	NIL	RXN0-3922	10.7609	1	RXN-8162	8.96963	NIL	RXN-707	8.33381	1	RXN-17832	4.19681	3	GLYCERYL-ETHER-MONOOXYGENASE-RXN	4.14414	1	RXN-22	4.81391	4	RXN-11490	4.72851	2	RXN66-354	4.77982	5	RXN-13868	4.78868	1	RXN-12357	5.02709	3	RXN-18261	4.75497	2	RXN-8699	4.2384	1	RXN-8960_f	8.30468	4	RXN-13403	7.22748	2	RXN-16456
	D-XYLOSE-1-DEHYDROGENASE-NADP+-RXN_f	6.04667	1	D-XYLOSE-1-DEHYDROGENASE-NADP+-RXN_f	6.04667	1	RXN-19112	10.7646	NIL	RXN-10781	8.97211	1	RXN-9878	8.33746	1	RXN-10827	4.1969	2	RXN-11981	4.14541	NIL	RXN-17067	4.81632	1	RXN-7733	4.72878	1	RXN-17382	4.78004	2	AICARTRANSFORM-RXN_f	4.78978	2	RXN-12694	5.02726	5	RXN0-6427	4.75721	3	TYROSINE-23-AMINOMUTASE-RXN_f	4.2392	5	RXN-8960_r	8.30468	4	MTDMBARK-RXN_f	7.23028	1	RXN-21295
	D-XYLOSE-1-DEHYDROGENASE-NADP+-RXN_r	6.04667	1	D-XYLOSE-1-DEHYDROGENASE-NADP+-RXN_r	6.04667	1	RXN-13106	10.7805	1	RXN-10092	8.99434	1	RXN-17712	8.34674	NIL	RXN-17138	4.19783	1	RXN-11261	4.14803	NIL	RXN-8801	4.81656	5	3.5.4.27-RXN	4.72922	3	RXN-21323	4.78291	NIL	AICARTRANSFORM-RXN_r	4.78978	2	RXN-15930	5.02735	NIL	RXN-14039	4.75918	3	TYROSINE-23-AMINOMUTASE-RXN_r	4.2392	5	RXN-16474	8.30599	3	MTDMBARK-RXN_r	7.23028	1	RXN-17427
	R364-RXN	6.04765	NIL	R364-RXN	6.04765	NIL	MANNITOL-2-DEHYDROGENASE-NADP+-RXN_f	10.7873	1	RXN-10090	8.99434	1	RXN5F9-56	8.35541	NIL	QUINOLINATE-SYNTHA-RXN	4.19805	2	RXN-15294	4.14844	1	RXN-10788	4.81724	NIL	RXN-9401	4.7299	NIL	RXN-7946	4.78474	5	METHYLACYLYLCOA-HYDROXY-RXN_f	4.79012	4	2.7.7.40-RXN	5.03116	2	RXN-12814	4.75918	3	R82-RXN	4.24146	5	RXN-13185	8.30699	1	RXN-15414	7.2319	1	RXN-15103
	RXN-14162	6.0568	1	RXN-14162	6.0568	1	MANNITOL-2-DEHYDROGENASE-NADP+-RXN_r	10.7873	1	RXN-9408	8.99505	1	RXN-1102	8.38012	1	RXN-15603	4.19854	NIL	RXN-18090	4.14914	NIL	RFFTRANS-RXN_f	4.81756	2	RXN-9400	4.7299	NIL	RXN-118	4.78587	NIL	METHYLACYLYLCOA-HYDROXY-RXN_r	4.79012	4	RXN-13865_f	5.03292	4	RXN-4961	4.76149	4	RXN-18225	4.24237	NIL	RXN-14640	8.30825	3	3-CH3-2-OXOBUTANOATE-OH-CH3-XFER-RXN_f	7.23204	2	RXN-12099
	1.1.1.274-RXN_f	6.057	1	1.1.1.274-RXN_f	6.057	1	1.1.1.289-RXN_f	10.7873	1	RXN-12654	9.00303	1	1.14.12.1-RXN	8.39404	1	RXN-11183	4.1993	3	1.13.11.55-RXN	4.15054	1	RFFTRANS-RXN_r	4.81756	2	RXN-9947	4.7299	NIL	RXN-17519	4.78631	1	OXALYL-COA-DECARBOXYLASE-RXN	4.7902	4	RXN-13865_r	5.03292	4	RXN-15012_f	4.76409	NIL	GLYOHMETRANS-RXN_f	4.24354	2	RXN-8793	8.31202	4	3-CH3-2-OXOBUTANOATE-OH-CH3-XFER-RXN_r	7.23204	2	RXN-12844
	1.1.1.274-RXN_r	6.057	1	1.1.1.274-RXN_r	6.057	1	1.1.1.289-RXN_r	10.7873	1	RXN-16033	9.01353	1	GLU6PDEHYDROG-RXN	8.40082	1	RXN-19285	4.20194	1	ALADEHYDCHLORO-RXN	4.15143	4	2.6.1.33-RXN_f	4.81756	2	RXN-9404	4.7299	NIL	RXN0-5124	4.7885	2	RXN-13596_f	4.79495	2	RXN18HP-6	5.03372	NIL	RXN-15012_r	4.76409	NIL	GLYOHMETRANS-RXN_r	4.24354	2	RXN-18833	8.31419	NIL	RXN-15722_f	7.23455	NIL	2.4.1.78-RXN
	RXN-14210_f	6.06905	NIL	RXN-14210_f	6.06905	NIL	RXN-16060_f	10.7913	1	RXN-9854	9.01451	1	GLUTAMATE-SYNTHASE-NADH-RXN	8.40772	1	RXN-12730	4.20612	2	RXN-668	4.15252	NIL	2.6.1.33-RXN_r	4.81756	2	NAD+-ADP-RIBOSYLTRANSFERASE-RXN_f	4.7309	2	RXN0-6575	4.78978	4	RXN-13596_r	4.79495	2	3.1.3.54-RXN	5.03373	3	RXN-13811	4.76415	3	N-ACETYLNEURAMINATE-SYNTHASE-RXN	4.24543	2	ISONOCARDICIN-SYNTHASE-RXN	8.31792	2	RXN-15722_r	7.23455	NIL	RXN18C3-12
	RXN-14210_r	6.06905	NIL	RXN-14210_r	6.06905	NIL	RXN-16060_r	10.7913	1	RXN-10717	9.0153	1	R542-RXN	8.41174	1	RXN-10890	4.20612	NIL	RXN-7984	4.15622	NIL	RXN-12126	4.81885	2	NAD+-ADP-RIBOSYLTRANSFERASE-RXN_r	4.7309	2	RXN-16456	4.7898	2	RXN-13423	4.79512	NIL	RXN-17334	5.03375	NIL	RXN-15328	4.76708	NIL	RXN-15789	4.24614	NIL	RXN-17844	8.31792	2	RXN0-5391_f	7.23658	5	2.4.1.117-RXN
	1.1.1.117-RXN	6.06992	1	1.1.1.117-RXN	6.06992	1	RXN-12072	10.8083	1	1.1.1.191-RXN_f	9.0153	1	GLUTAMATESYN-RXN	8.42278	1	RXN-12055	4.20963	NIL	RXN-11065	4.15636	3	RXN-19756	4.81929	NIL	RXN-8469	4.73268	1	RXN-21295	4.7898	2	RXN-18246	4.7964	2	CHOLESTEROL-OXIDASE-RXN	5.03412	1	RXN-14270	4.76709	2	RXN-9584	4.24827	NIL	RXN-19150	8.31938	5	RXN0-5391_r	7.23658	5	RXN-19359
	RXN-14249	6.07006	1	RXN-14249	6.07006	1	D-LYSOPINE-DEHYDROGENASE-RXN	10.8135	1	1.1.1.191-RXN_r	9.0153	1	RXN-11720	8.4239	NIL	STRICTOSIDINE-SYNTHASE-RXN	4.21054	4	ACETYLSPERMIDINE-DEACETYLASE-RXN	4.15848	3	RXN-11027	4.8196	NIL	RXN-15224	4.73348	2	RXN-14569_f	4.79044	2	RXN0-6994	4.79938	3	RXN0-7347_f	5.03569	NIL	RXN-19139	4.77199	NIL	RXN-12529	4.24878	NIL	RXN6666-2	8.32041	3	RXN-19604	7.23679	3	RXN0-7010
	RXN-13783	6.07007	1	RXN-13783	6.07007	1	LINC-RXN_f	10.8151	NIL	ANTHRANILOYL-COA-MONOOXYGENASE-RXN	9.02638	1	RXN-20434	8.4294	1	GLYCINE-AMIDINOTRANSFERASE-RXN	4.21197	2	RXN-10747	4.15893	1	UNDECAPRENYL-DIPHOSPHATASE-RXN	4.8196	3	RXN-172	4.735	NIL	RXN-14569_r	4.79044	2	RXN-18250	4.80043	2	RXN0-7347_r	5.03569	NIL	RXN-19294_f	4.77266	5	RXN-18936	4.2491	3	RXN-8666	8.32145	1	RXN-17744	7.23763	1	UDP-NACMUR-ALA-LIG-RXN
	RXN66-342_f	6.0701	1	RXN66-342_f	6.0701	1	LINC-RXN_r	10.8151	NIL	RXN-19622	9.0373	NIL	SOLDEHYD-RXN_f	8.43131	1	RXN-10897	4.21355	NIL	2.5.1.44-RXN	4.15944	2	CHORISMATE-SYNTHASE-RXN	4.82236	4	RXN-6321	4.73538	NIL	FRUCTOSE-6-PHOSPHATE-PHOSPHOKETOLASE-RXN	4.79115	4	QUINOPRIBOTRANS-RXN	4.80048	2	RXN-15959	5.03594	NIL	RXN-19294_r	4.77266	5	2.6.1.7-RXN_f	4.25078	2	RXN-18834	8.32188	NIL	RXN-13826	7.23992	NIL	RXN-17519
	RXN66-342_r	6.0701	1	RXN66-342_r	6.0701	1	RXN-18647	10.8285	NIL	RXN-11965	9.03924	1	SOLDEHYD-RXN_r	8.43131	1	RXN-13535	4.21543	NIL	PROPIONLACT-RXN_f	4.16069	2	RXN-17754	4.82347	NIL	2.5.1.66-RXN	4.73544	2	RXN-17156	4.79327	NIL	RXN-11806	4.80253	NIL	RXN0-7022	5.0388	6	RXN-14844	4.77363	5	2.6.1.7-RXN_r	4.25078	2	RXN-16086	8.32292	NIL	RXN-15502	7.24536	NIL	RXN-2222
	RXN-10715	6.07064	1	RXN-10715	6.07064	1	RXN-21097	10.8353	NIL	RXN-17145	9.03997	NIL	RXN66-81	8.44944	1	RXN0-1382_f	4.21575	2	PROPIONLACT-RXN_r	4.16069	2	RXN-12128	4.82363	2	RXN-19277	4.73685	NIL	RXN-15276	4.79473	2	RXN-13799	4.80393	NIL	RXN-19543	5.03937	3	2.4.1.117-RXN	4.77391	2	RXN-16474	4.25156	3	RXN-19641	8.32388	4	2.4.1.53-RXN	7.24543	2	RXN-13799
	RXN-16964	6.08898	1	RXN-16964	6.08898	1	RXN-8014	10.8407	NIL	1.1.1.190-RXN	9.0402	1	1.14.13.59-RXN	8.4597	1	RXN0-1382_r	4.21575	2	LACCOA-RXN_f	4.16069	2	RXN-20557	4.82907	3	RXN-12152	4.73773	NIL	TRYPSYN-RXN	4.79521	4	RXN-18548	4.80472	3	RXN-13533	5.03989	NIL	RXN-10665	4.77551	4	RXN-8813	4.25399	2	RXN-16750	8.32687	2	RXN-9457	7.24621	5	RXN-20580
	1.1.1.8-RXN	6.09055	1	1.1.1.8-RXN	6.09055	1	RXN-12079_f	10.845	NIL	RXN0-6511	9.04117	NIL	RXN-13129	8.46064	1	RXN-13023_f	4.22075	NIL	LACCOA-RXN_r	4.16069	2	RXN-14420	4.82934	2	RXN-9664	4.73807	5	RXN-17074	4.79629	2	LUMAZINESYN-RXN	4.80564	2	RIBULOSE-BISPHOSPHATE-CARBOXYLASE-RXN	5.04045	4	RXN-12963	4.7768	1	RXN-624	4.25491	3	RXN0-262	8.32733	2	RXN-14494	7.25428	4	2.3.1.154-RXN
	DHBDEHYD-RXN	6.09199	1	DHBDEHYD-RXN	6.09199	1	RXN-12079_r	10.845	NIL	RXN-1241	9.05614	1	RXN-8775	8.46096	1	RXN-13023_r	4.22075	NIL	RXN-13938_f	4.16295	NIL	RXN-17160	4.83033	NIL	RXN0-5186	4.73861	NIL	SINAPINE-ESTERASE-RXN	4.79643	3	RXN66-495	4.80578	1	RXN-19171	5.04433	NIL	RXN-11221	4.77788	2	RXN-18397	4.259	3	RXN-18020	8.32958	2	ECDYSONE-OXIDASE-RXN	7.25563	1	2-OCTAPRENYLPHENOL-HYDROX-RXN
	24-DICHLOROPHENOL-6-MONOOXYGENASE-RXN	6.09839	1	24-DICHLOROPHENOL-6-MONOOXYGENASE-RXN	6.09839	1	RXN6666-5	10.8477	1	RXN-16652	9.05862	1	RXN-19061	8.47555	NIL	RXN-19586	4.22206	4	RXN-13938_r	4.16295	NIL	RXN-17519	4.83056	1	RXN-20785	4.7392	2	RXN-11434	4.79721	3	RXN-17473	4.80674	NIL	RXN-15413	5.04692	NIL	RXN-7984	4.7784	NIL	URATE-OXIDASE-RXN	4.26023	1	RXN-17837	8.33028	2	RXN-19229	7.25584	2	LACTOYL-COA-DEHYDRATASE-RXN
	RXN-8847	6.09923	NIL	RXN-8847	6.09923	NIL	RXN-9891	10.8567	1	RXN-17403_f	9.06532	1	LYSINE-6-DEHYDROGENASE-RXN_f	8.4893	1	CHLOROGENATE-HYDROLASE-RXN	4.2224	3	RXN-10824	4.16351	1	RXN-16498	4.83154	NIL	2.4.1.211-RXN_f	4.74159	2	RXN-7241	4.79742	3	RXN-19975	4.81067	NIL	RXN-17002	5.04977	NIL	RXN-18344	4.77871	NIL	RXN-4222	4.26067	NIL	RXN-19051	8.33037	4	RXN-20785	7.25594	2	RXN-16275
	RXN-17768	6.10094	1	RXN-17768	6.10094	1	RXN-14819	10.8629	1	RXN-17403_r	9.06532	1	LYSINE-6-DEHYDROGENASE-RXN_r	8.4893	1	RXN-13534	4.22253	NIL	RXN-12090	4.16409	1	RXN-8106	4.83232	1	2.4.1.211-RXN_r	4.74159	2	RXN-10942	4.79742	3	ADCLY-RXN	4.81115	4	RXN-15937	5.05038	NIL	RXN-19306	4.77946	2	RXN-15421_f	4.26229	2	RXN-7891	8.33093	NIL	RXN-20571	7.25629	1	RXN-10701
	CHMS-DEHYDROGENASE-RXN	6.10421	1	CHMS-DEHYDROGENASE-RXN	6.10421	1	ACETOLACTREDUCTOISOM-RXN	10.8687	1	1.3.1.64-RXN_f	9.08591	1	RXN0-5387	8.49046	NIL	PYRIDOXAL-OXIDASE-RXN	4.22287	1	RXN-9940	4.16409	1	RXN-10895	4.83656	NIL	RXN-15419_f	4.74265	2	RXN-18548	4.79801	3	RXN-19972	4.81194	NIL	FRUCTOSE-6-PHOSPHATE-PHOSPHOKETOLASE-RXN	5.0511	4	RXN-17809	4.7811	4	RXN-15421_r	4.26229	2	RXN-15980	8.33335	NIL	RXN-20572	7.25629	1	RXN3O-504
	RXN-21030	6.11294	NIL	RXN-21030	6.11294	NIL	RXN-16062	10.8739	1	1.3.1.64-RXN_r	9.08591	1	DIMETHUROPORDEHYDROG-RXN	8.4991	1	BETA-DIKETONE-HYDROLASE-RXN	4.22336	3	RXN-11649	4.16465	NIL	RXN-16011	4.83813	NIL	RXN-15419_r	4.74265	2	RXN3O-203	4.79817	NIL	2.4.1.211-RXN_f	4.81238	2	RXN-11711	5.05203	NIL	R266-RXN	4.78312	NIL	RXN-13034	4.26413	4	RXN-15749	8.33489	NIL	RXN-14785	7.25637	1	RXN-19138
	RXN0-5410	6.11539	NIL	RXN0-5410	6.11539	NIL	RXN-10855	10.8788	NIL	RXN-17597	9.10033	1	RXN-20922	8.50402	NIL	4.1.1.81-RXN	4.22612	4	ALKAPHOSPHA-RXN	4.16578	3	RXN-18576	4.83954	4	RXN-15333	4.74607	NIL	3.1.1.47-RXN	4.79854	3	2.4.1.211-RXN_r	4.81238	2	6.3.1.9-RXN	5.0525	6	3.1.1.82-RXN	4.78437	3	VICIANIN-BETA-GLUCOSIDASE-RXN	4.26556	3	RXN-14242	8.3374	5	RXN-14771	7.25637	1	RXN-7893
	PYRROLINE-2-CARBOXYLATE-REDUCTASE-RXN	6.13712	1	PYRROLINE-2-CARBOXYLATE-REDUCTASE-RXN	6.13712	1	RXN-17175_f	10.8796	1	RXN-19063	9.11606	1	RXN-14686	8.50632	1	RXN-11665	4.22701	3	ACID-PHOSPHATASE-RXN	4.16578	3	RXN18C3-9	4.84421	NIL	RXN-8771	4.74847	1	RXN-19975	4.79984	NIL	RXN-8077	4.81408	NIL	RXN-15089	5.05298	3	RXN-8073	4.78548	NIL	RXNQT-4359	4.26592	3	RXN-13534	8.3376	NIL	STRICTOSIDINE-SYNTHASE-RXN	7.25674	4	GLUTACONYL-COA-DECARBOXYLASE-RXN
	RXN-18499	6.14146	1	RXN-18499	6.14146	1	RXN-17175_r	10.8796	1	RXN-7745	9.11753	NIL	RXN-8752	8.51331	1	RXN-6421	4.22746	1	RXN-12723	4.16598	4	RXN-20673	4.84687	NIL	RXN-12723	4.74926	4	2.7.7.1-RXN	4.80165	2	3.2.1.48-RXN	4.81438	3	L-GLN-FRUCT-6-P-AMINOTRANS-RXN_f	5.05332	2	RXN-18771	4.78712	2	ARYLFORMAMIDASE-RXN	4.26658	3	RXN-19897_f	8.33774	2	ACETYL-COA-ACETYLTRANSFER-RXN_f	7.25771	2	RXN-15362
	RXN-15753_f	6.14385	1	RXN-15753_f	6.14385	1	RXN-13108	10.8992	1	1.14.13.18-RXN	9.12525	1	1.5.1.24-RXN	8.51472	1	RXN-5647	4.22766	3	3.1.4.2-RXN	4.16716	3	RXN-17701	4.84849	3	RIB5PISOM-RXN_f	4.75161	5	RXN-11490	4.80253	2	RXN-16922	4.81455	NIL	L-GLN-FRUCT-6-P-AMINOTRANS-RXN_r	5.05332	2	RXN-16609_f	4.78722	3	INDOLE-3-ACETALDEHYDE-OXIDASE-RXN	4.26796	1	RXN-19897_r	8.33774	2	ACETYL-COA-ACETYLTRANSFER-RXN_r	7.25771	2	BETA-ALANYL-COA-AMMONIA-LYASE-RXN_f
	RXN-15753_r	6.14385	1	RXN-15753_r	6.14385	1	RXN-12080_f	10.9044	NIL	RXN-16667	9.12604	NIL	PHENPRODIOLDEHYDROG-RXN	8.51583	1	RXN-12234_f	4.22809	NIL	RXN-18775	4.16841	2	RXN-16588	4.85111	NIL	RIB5PISOM-RXN_r	4.75161	5	RXN-12963	4.8027	1	RXN-8764	4.81501	2	RXN-21336	5.05339	4	RXN-16609_r	4.78722	3	RXN-18223	4.26824	NIL	RXN-17156	8.34191	NIL	RXN-17837	7.25893	2	BETA-ALANYL-COA-AMMONIA-LYASE-RXN_r
	1.1.1.263-RXN	6.14682	1	1.1.1.263-RXN	6.14682	1	RXN-12080_r	10.9044	NIL	ACETOOHBUTREDUCTOISOM-RXN	9.12647	1	RXN-13587_f	8.51715	1	RXN-12234_r	4.22809	NIL	GLUTAMIN-RXN	4.16928	3	RXN-11261	4.8516	NIL	DARAB5PISOM-RXN_f	4.75161	5	RXN-12042	4.80341	6	RXN-18848	4.81635	NIL	RXN-17377	5.05421	2	RXN-14777_f	4.78749	5	4.3.1.4-RXN_f	4.26957	4	RXN-14714_f	8.34287	5	RXN-19189_f	7.2603	NIL	ATP-ADENYLYLTRANSFERASE-RXN_f
	RXNQT-4335	6.1516	1	RXNQT-4335	6.1516	1	RXN-13262	10.9145	4	RXN-8739	9.12875	1	RXN-13587_r	8.51715	1	RXN-8991_f	4.22864	NIL	2.1.3.7-RXN	4.17565	2	RXN-18493	4.85247	3	DARAB5PISOM-RXN_r	4.75161	5	RXN-18263	4.8045	2	F16BDEPHOS-RXN	4.81825	3	RXN-15494	5.05528	NIL	RXN-14777_r	4.78749	5	4.3.1.4-RXN_r	4.26957	4	RXN-14714_r	8.34287	5	RXN-19189_r	7.2603	NIL	ATP-ADENYLYLTRANSFERASE-RXN_r
	GLUTAMATE-DEHYDROGENASE-RXN_f	6.1554	1	GLUTAMATE-DEHYDROGENASE-RXN_f	6.1554	1	RXN-12898_f	10.9255	1	RXN-10915_f	9.13944	1	RXN-19393	8.52053	1	RXN-8991_r	4.22864	NIL	RXN-8966_f	4.1763	2	RXN-16275	4.85317	2	2.6.1.80-RXN_f	4.75179	2	RXN-9585	4.80472	NIL	DAHPSYN-RXN_f	4.81876	2	RXN-19595	5.05813	3	R345-RXN	4.78813	6	4.1.1.38-RXN_f	4.27007	4	RXN-20142	8.34366	NIL	RXN-13001	7.26233	4	RXN-8040
	GLUTAMATE-DEHYDROGENASE-RXN_r	6.1554	1	GLUTAMATE-DEHYDROGENASE-RXN_r	6.1554	1	RXN-12898_r	10.9255	1	RXN-10915_r	9.13944	1	RXN0-901_f	8.52302	1	RXN-1	4.22921	1	RXN-8966_r	4.1763	2	RXN-4201	4.85457	2	2.6.1.80-RXN_r	4.75179	2	2.6.1.80-RXN_f	4.80475	2	DAHPSYN-RXN_r	4.81876	2	RXN0-5124	5.05833	2	RXN-17139	4.78864	1	4.1.1.38-RXN_r	4.27007	4	RXNQT-4344	8.34433	NIL	RXN-17998	7.26349	NIL	RXN-21325
	YIAE1-RXN	6.16425	NIL	YIAE1-RXN	6.16425	NIL	RXN-11493	10.9287	NIL	RXN-14776	9.14351	NIL	RXN0-901_r	8.52302	1	RXN-12153	4.22981	NIL	2.8.3.7-RXN_f	4.1763	2	RXN-15400_f	4.85546	NIL	MCHMBARK-RXN_f	4.75206	3	2.6.1.80-RXN_r	4.80475	2	ISOCHORMAT-RXN	4.82123	3	RXN-19177	5.05934	NIL	RXN-16246	4.79028	2	RXN-8810	4.27046	2	2.8.3.17-RXN	8.3457	2	RXN-19641	7.2643	4	RXN-16055
	RXN-18376	6.1682	1	RXN-18376	6.1682	1	D-THREO-ALDOSE-1-DEHYDROGENASE-RXN_f	10.9298	1	RXN-14790	9.14351	NIL	1.2.1.65-RXN	8.52412	1	RXN-10099_f	4.2307	5	2.8.3.7-RXN_r	4.1763	2	RXN-15400_r	4.85546	NIL	MCHMBARK-RXN_r	4.75206	3	RXN-7893	4.80591	NIL	RXN-16480_f	4.82194	1	RXN-10609	5.06082	2	RXN-13596_f	4.79059	2	RXN-18665	4.27154	2	RXN-21094	8.34629	NIL	RXN-12324_f	7.26452	NIL	RXN-12723
	RXN-9866	6.16922	1	RXN-9866	6.16922	1	D-THREO-ALDOSE-1-DEHYDROGENASE-RXN_r	10.9298	1	RXN-8819	9.15828	1	DIIODOPHENYLPYRUVATE-REDUCTASE-RXN_f	8.53335	1	RXN-10099_r	4.2307	5	RXN-14933_f	4.1763	2	RXN-9494	4.85597	4	RXN-21328	4.75311	NIL	RXN-8469	4.80645	1	RXN-16480_r	4.82194	1	RXN-9000	5.06147	2	RXN-13596_r	4.79059	2	RXN-18933	4.27204	3	RXN-18222_f	8.34694	3	RXN-12324_r	7.26452	NIL	ISOBUTYRYL-COA-MUTASE-RXN_f
	RXN-9858	6.17234	1	RXN-9858	6.17234	1	RXN8J2-136	10.9323	1	RXN-707	9.1632	1	DIIODOPHENYLPYRUVATE-REDUCTASE-RXN_r	8.53335	1	RXN-13628	4.23149	NIL	RXN-14933_r	4.1763	2	RXN-19313	4.85659	3	RXN-10643	4.75319	4	RXN0-303_f	4.80651	NIL	2.1.1.90-RXN	4.82231	2	RXN-19170	5.06328	NIL	RXN-10034	4.7918	3	RXN-14479	4.2735	NIL	RXN-18222_r	8.34694	3	RXN-5467	7.26619	2	ISOBUTYRYL-COA-MUTASE-RXN_r
	RXN-17601_f	6.17936	NIL	RXN-17601_f	6.17936	NIL	RXN-10450	10.9498	1	RXN-19392	9.1669	1	THREODEHYD-RXN	8.53569	1	RXN-14253	4.23205	NIL	BTUR2-RXN	4.18091	2	1TRANSKETO-RXN_f	4.8572	2	RXN0-1862	4.75325	2	RXN0-303_r	4.80651	NIL	RXN-11430	4.82258	3	RXN-18771	5.06467	2	RXN-8960_f	4.79259	4	RXN-9894	4.27569	NIL	RXN-17605_f	8.34858	5	RXN-5466	7.26619	2	RXNQT-4344
	RXN-17601_r	6.17936	NIL	RXN-17601_r	6.17936	NIL	9-FLUORENOL-DEHYDROGENASE-RXN	10.9503	1	RXN-13162	9.16826	2	RXN-16794	8.53718	1	RXN-18527	4.23264	NIL	RXN-19040	4.18112	2	1TRANSKETO-RXN_r	4.8572	2	RXN-20784	4.75525	2	RXN-8746	4.80688	3	RXN-16246	4.82275	2	2.7.1.90-RXN_f	5.06709	2	RXN-8960_r	4.79259	4	RXN-10087	4.27569	NIL	RXN-17605_r	8.34858	5	RXN-15333	7.26837	NIL	RXN-10003
	RXN-16775	6.18817	1	RXN-16775	6.18817	1	HCAMULTI-RXN	10.9626	1	DIAMINOPIMELATE-DEHYDROGENASE-RXN_f	9.17909	1	RXN-16795	8.53718	1	OLEATE-HYDRATASE-RXN	4.2335	4	RXN-19033	4.18112	NIL	2.7.7.30-RXN	4.85736	2	RXN0-7066	4.75549	NIL	GANGLIOSIDE-GALACTOSYLTRANSFERASE-RXN	4.8073	2	OLEATE-HYDRATASE-RXN	4.82288	4	2.7.1.90-RXN_r	5.06709	2	RXN-10699	4.79579	2	HYOSCYAMINE-6-DIOXYGENASE-RXN	4.2797	1	RXN-15603	8.34926	NIL	RXN-12718	7.27293	3	RXN-17083
	PYRIDOXINE-4-DEHYDROGENASE-RXN_f	6.18869	1	PYRIDOXINE-4-DEHYDROGENASE-RXN_f	6.18869	1	RXN-19394	10.9676	1	DIAMINOPIMELATE-DEHYDROGENASE-RXN_r	9.17909	1	RXN-665	8.53955	1	RXN-13091	4.23696	NIL	RXN-12728	4.18381	NIL	RXN-19697	4.85799	2	RXN-8675	4.75644	NIL	RXN-15203_f	4.80739	2	RXN-19662	4.8246	NIL	RXN-12234_f	5.0695	NIL	RXN-19173	4.79581	NIL	RXN-19586	4.27976	4	RXN-9457	8.3494	5	RXN-10665	7.27334	4	RXN-19301
	PYRIDOXINE-4-DEHYDROGENASE-RXN_r	6.18869	1	PYRIDOXINE-4-DEHYDROGENASE-RXN_r	6.18869	1	RXN-12095	10.9719	1	RXN-18853	9.18024	1	RXN-11315	8.54716	1	2.5.1.69-RXN	4.2374	2	RXN0-7010	4.18512	1	RXN-9036	4.85907	NIL	RXN-19972	4.75801	NIL	RXN-15203_r	4.80739	2	1.14.11.26-RXN	4.8254	1	RXN-12234_r	5.0695	NIL	RXN-13276	4.79625	2	RXN-13642	4.28152	1	RXN-9847	8.34949	4	CERAMIDASE-RXN	7.2756	3	VICIANIN-BETA-GLUCOSIDASE-RXN
	RXN-17420_f	6.19021	1	RXN-17420_f	6.19021	1	RXN-9879	10.9724	1	R222-RXN	9.18143	1	PYRIDOXAL-4-DEHYDROGENASE-RXN	8.54742	1	PYRNUTRANSHYDROGEN-RXN_f	4.2376	1	RXN-6201	4.18591	4	2.4.1.213-RXN	4.86064	2	SUCCINYLDIAMINOPIMTRANS-RXN	4.75895	2	3.2.1.17-RXN	4.80904	3	CPM-KDOSYNTH-RXN	4.82572	2	RXN-17419	5.07066	NIL	UDP-GALACTURONATE-DECARBOXYLASE-RXN_f	4.79677	4	RXN-10741	4.28152	1	RXN-8763	8.35026	3	RXN-12611	7.27799	2	RXN-14270
	RXN-17420_r	6.19021	1	RXN-17420_r	6.19021	1	1.2.1.47-RXN	10.973	1	GLU6PDEHYDROG-RXN	9.19683	1	RXN-17096	8.54754	1	PYRNUTRANSHYDROGEN-RXN_r	4.2376	1	RXN-10643	4.18784	4	3.2.1.26-RXN	4.86076	NIL	ECDYSONE-OXIDASE-RXN	4.75942	1	H2NEOPTERINALDOL-RXN	4.80961	4	RXN-17754	4.82588	NIL	RXN-21339	5.07066	4	UDP-GALACTURONATE-DECARBOXYLASE-RXN_r	4.79677	4	RXN-10099_f	4.28188	5	RXN-15012_f	8.35125	NIL	RXN-12349	7.27842	1	RXN-14794
	MEVALDATE-REDUCTASE-NADPH-RXN	6.19655	1	MEVALDATE-REDUCTASE-NADPH-RXN	6.19655	1	SUCCGLUALDDEHYD-RXN	10.976	1	RXNDQC-2	9.20082	1	RXN-13194	8.54781	1	RXN-11455_f	4.239	3	RXN-11818	4.18844	1	RXN-864_f	4.86108	2	RXN-14285	4.76067	2	RXN-10857	4.80961	4	4-NITROPHENYLPHOSPHATASE-RXN	4.82605	3	2.4.1.79-RXN	5.07098	2	UDP-GLUCURONATE-DECARBOXYLASE-RXN	4.79677	4	RXN-10099_r	4.28188	5	RXN-15012_r	8.35125	NIL	RXN-12520	7.27999	5	RXN-16274
	RXN-13089	6.20333	1	RXN-13089	6.20333	1	1.1.1.251-RXN_f	10.9803	1	RXN-12071	9.20339	1	N-ACYLMANNOSAMINE-1-DEHYDROGENASE-RXN_f	8.55038	1	RXN-11455_r	4.239	3	RXN-18064	4.19219	NIL	RXN-864_r	4.86108	2	RXN-13221	4.76067	1	METHYL-COM-HTP-RXN_f	4.81141	2	RXN0-1382_f	4.82647	2	RXN-5463	5.07239	2	RXN-16762	4.7974	NIL	RXN-11099	4.28227	NIL	RXN-14546	8.35208	2	2.3.1.101-RXN_f	7.2809	2	RXN-12168
	RXN-15754_f	6.20415	1	RXN-15754_f	6.20415	1	1.1.1.251-RXN_r	10.9803	1	RXN-9878	9.22277	1	N-ACYLMANNOSAMINE-1-DEHYDROGENASE-RXN_r	8.55038	1	RXN-9856	4.24034	5	RXN-11329	4.19442	1	RXN-16903_f	4.86201	2	4.3.1.4-RXN_f	4.76165	4	METHYL-COM-HTP-RXN_r	4.81141	2	RXN0-1382_r	4.82647	2	RXN-14600	5.07442	3	RXN-17459	4.79813	NIL	RXN-19641	4.28424	4	RXN-12153	8.35259	NIL	2.3.1.101-RXN_r	7.2809	2	METHYLGLUTACONYL-COA-HYDRATASE-RXN_f
	RXN-15754_r	6.20415	1	RXN-15754_r	6.20415	1	SORB6PDEHYDROG-RXN_f	10.9803	1	RXN-17712	9.24181	NIL	RXN-18711	8.55743	NIL	RXN-1444	4.24177	3	CHLORIDE-PEROXIDASE-RXN	4.19495	1	RXN-16903_r	4.86201	2	4.3.1.4-RXN_r	4.76165	4	2.5.1.69-RXN	4.81177	2	RXN-11027	4.82855	NIL	RXN-18772	5.07576	2	RXN-15103	4.79824	2	RXN-13023_f	4.2928	NIL	RXN-8992	8.35354	2	RXN-15089	7.28098	3	METHYLGLUTACONYL-COA-HYDRATASE-RXN_r
	RXN-21086	6.20511	NIL	RXN-21086	6.20511	NIL	SORB6PDEHYDROG-RXN_r	10.9803	1	RXN5F9-56	9.25606	NIL	3-DEHYDRO-L-GULONATE-2-DEHYDROGENASE-RXN_f	8.57438	1	RXN-15964	4.24452	NIL	RXN-17607_f	4.1959	3	RXN-16570	4.86201	2	RXN-18150	4.76168	3	RXN-15224	4.81199	2	UNDECAPRENYL-DIPHOSPHATASE-RXN	4.82855	3	RXN-14876_f	5.07693	5	RXN-20424	4.79845	NIL	RXN-13023_r	4.2928	NIL	RXN-16056	8.35376	NIL	HYDROXYMETHYLGLUTARYL-COA-REDUCTASE-RXN_f	7.28208	1	RXN-12101
	RXN-7572_f	6.21762	NIL	RXN-7572_f	6.21762	NIL	LONG-CHAIN-ALDEHYDE-DEHYDROGENASE-RXN	10.9876	1	RXN-1102	9.26354	1	3-DEHYDRO-L-GULONATE-2-DEHYDROGENASE-RXN_r	8.57438	1	RXN-8147	4.24455	1	RXN-17607_r	4.1959	3	RXN-20664	4.8632	NIL	RXN-10767	4.76208	3	RXN-17955	4.81263	3	RXN-11502	4.83168	NIL	RXN-14876_r	5.07693	5	CEPHALOSPORIN-C-DEACETYLASE-RXN	4.8	3	RXN-13166	4.2934	NIL	RXN-13736_f	8.35451	2	HYDROXYMETHYLGLUTARYL-COA-REDUCTASE-RXN_r	7.28208	1	RXN-12722
	RXN-7572_r	6.21762	NIL	RXN-7572_r	6.21762	NIL	RXN-13109	10.9974	1	R542-RXN	9.28738	1	RXN-10442	8.57729	1	RXN-17684	4.24462	NIL	RXN-8845	4.20003	3	IGPSYN-RXN	4.87153	4	RXN-20983	4.7621	NIL	RXN-16582	4.81446	NIL	S-NORLAUDANOSOLINE-SYNTHASE-RXN	4.83235	4	3.1.4.2-RXN	5.08234	3	RXN-18251	4.8005	2	HEMN-RXN	4.29356	1	RXN-13736_r	8.35451	2	BETA-ALANYL-COA-AMMONIA-LYASE-RXN_f	7.28257	4	RXN-18585_f
	PGLYCDEHYDROG-RXN_f	6.2187	1	PGLYCDEHYDROG-RXN_f	6.2187	1	RXN-13298	10.999	1	RXN66-81	9.31097	1	RXN-18411	8.596	1	RXN-13181	4.24662	3	KIEVITONE-HYDRATASE-RXN	4.20358	4	RXN-19595	4.87361	3	RXN-11454	4.76225	1	RXN-18264	4.81475	2	RXN0-4841_f	4.83474	5	RXN-15681	5.08244	NIL	2.4.1.78-RXN	4.80102	2	RXN-10053	4.29582	2	RXN-13803_f	8.35451	2	BETA-ALANYL-COA-AMMONIA-LYASE-RXN_r	7.28257	4	RXN-18585_r
	PGLYCDEHYDROG-RXN_r	6.2187	1	PGLYCDEHYDROG-RXN_r	6.2187	1	RXN-11518	11.0067	1	1.14.12.1-RXN	9.31531	1	RXN-15485	8.59964	NIL	RXN-8244	4.2469	1	RXN-11351	4.20381	3	RXN-12231	4.87445	NIL	RXN-19821	4.76308	4	RXN-12704	4.81624	NIL	RXN0-4841_r	4.83474	5	RXN-15295	5.08544	1	RXN-19604	4.80146	3	RXN-18801	4.29647	NIL	RXN-13803_r	8.35451	2	GLYCOSYLCERAMIDASE-RXN	7.28421	3	RXN-16474
	RXN3O-4113	6.23698	1	RXN3O-4113	6.23698	1	LONG-CHAIN-ALCOHOL-DEHYDROGENASE-RXN_f	11.0074	1	GLUTAMATESYN-RXN	9.31592	1	RXN-16798	8.60247	1	RXN-12532	4.24839	NIL	BENZOIN-ALDOLASE-RXN_f	4.20414	4	RXN-18838	4.87718	1	RXN-6524	4.76311	NIL	RXN-19175	4.81719	NIL	RXN-11367	4.83718	2	RXN-14560	5.0858	2	RXN-13430	4.80147	3	RIBOSYLHOMOCYSTEINASE-RXN	4.29678	4	RXN-13734	8.35451	2	RXN-7836_f	7.28631	5	RXN-12338
[truncated: 7,920 more rows]
[truncated: 44 more columns]

## Sheet: SIMMER_substrate
drug	microbial enzyme/gene	EC (literature)	SIMMER_substrate EC	Literature sequence found in top 20 reactions	Reaction rank	Reaction	Euclidean distance to reaction yielding positive control	Euclidean distance to farthest reaction	Normalized Euclidean distance	Reaction FPR
[truncated: 37 more rows]
