# Supplementary material for: SIMMER employs similarity algorithms to accurately identify human gut microbiome species and enzymes capable of known chemical transformations
Source: eLife. 2023 Jun 12;12:e82401. doi: 10.7554/eLife.82401 (PMC10289814; doi:10.7554/eLife.82401)
Supplement: Figure 7—source data 1. [file elife-82401-fig7-data1.xlsx]

## Sheet: MTX_SIMMER_enzyme_table
UHGG_ID	Prokka_annotation	Lineage	Phylum	Full_seq_evalue	Full_seq_bitscore	Length	No_domains	Domain_indices	Best_domain_evalue	UHGG_Genome	Genome_type	Original_name	GC_content	UHGG_name	Prevalence	Abundance
GUT_GENOME253072_00857	Putative succinyl-diaminopimelate desuccinylase DapE	d__Bacteria;p__Bacteroidota;c__Bacteroidia;o__Bacteroidales;f__Bacteroidaceae;g__43-108;s__43-108 sp001915545	p__Bacteroidota	4.1e-12	42.5	236	1	[[26, 282]]	5.6e-12	GUT_GENOME253072	MAG	XieH_2016__YSZC12003_35739__bin.8	43.39	103992	0.364631	0.0137594
GUT_GENOME189606_01576	N-acetyl-lysine deacetylase	d__Bacteria;p__Firmicutes_A;c__Clostridia;o__Lachnospirales;f__Lachnospiraceae;g__UBA7096;s__	p__Firmicutes_A	2e-08	30	298	1	[[63, 377]]	2.9e-08	GUT_GENOME189606	MAG	SRR5056738_bin.13	43.49	102973
GUT_GENOME177471_03588	Acetylornithine deacetylase	d__Bacteria;p__Proteobacteria;c__Gammaproteobacteria;o__Enterobacterales;f__Enterobacteriaceae;g__Metakosakonia;s__Metakosakonia intestini	p__Proteobacteria	8.6e-14	49	231	1	[[1, 283]]	1.1e-13	GUT_GENOME177471	MAG	SRR3132471_bin.3	53.25	102904
GUT_GENOME177471_01351	Acetylornithine deacetylase	d__Bacteria;p__Proteobacteria;c__Gammaproteobacteria;o__Enterobacterales;f__Enterobacteriaceae;g__Metakosakonia;s__Metakosakonia intestini	p__Proteobacteria	2.6e-12	44.1	245	1	[[6, 322]]	3.3e-12	GUT_GENOME177471	MAG	SRR3132471_bin.3	53.25	102904
GUT_GENOME187127_00716	putative succinyl-diaminopimelate desuccinylase	d__Bacteria;p__Actinobacteriota;c__Coriobacteriia;o__Coriobacteriales;f__Coriobacteriaceae;g__Collinsella;s__	p__Actinobacteriota	3.2e-12	42.4	320	1	[[8, 388]]	3.9e-12	GUT_GENOME187127	MAG	SRR4783567_bin.44	60.05	102958
GUT_GENOME111204_02153	Carboxypeptidase G2	d__Bacteria;p__Firmicutes_A;c__Clostridia;o__Oscillospirales;f__CAG-272;g__Firm-07;s__	p__Firmicutes_A	1.8e-30	102.8	301	1	[[37, 380]]	2.3e-30	GUT_GENOME111204	MAG	LeChatelierE_2013__MH0206__bin.12	53.28	101821
GUT_GENOME112422_00192	Acetylornithine deacetylase	d__Archaea;p__Thermoplasmatota;c__Thermoplasmata;o__Methanomassiliicoccales;f__Methanomassiliicoccaceae;g__Methanomassiliicoccus_A;s__	p__Thermoplasmatota	6.7e-18	60.9	283	1	[[0, 263]]	1.3e-17	GUT_GENOME112422	MAG	LeChatelierE_2013__MH0318__bin.77	44.5	101856	0.0911577	0.00133769
GUT_GENOME110833_03003	Peptidase T	d__Bacteria;p__Firmicutes_A;c__Clostridia;o__Lachnospirales;f__Lachnospiraceae;g__COE1;s__	p__Firmicutes_A	9.4e-19	64.8	255	1	[[2, 271]]	1.3e-18	GUT_GENOME110833	MAG	LeChatelierE_2013__MH0193__bin.18	40.57	101814
GUT_GENOME022350_00816	Carboxypeptidase G2	d__Bacteria;p__Firmicutes_C;c__Negativicutes;o__Veillonellales;f__Dialisteraceae;g__Dialister;s__Dialister sp002320515	p__Firmicutes_C	8.9e-48	159.8	386	1	[[3, 383]]	1.1e-47	GUT_GENOME022350	MAG	CosteaPI_2017__SID713A023-11-0-0__bin.37	51.95	100671	2.3701	0.0163034
GUT_GENOME022350_00817	Carboxypeptidase G2	d__Bacteria;p__Firmicutes_C;c__Negativicutes;o__Veillonellales;f__Dialisteraceae;g__Dialister;s__Dialister sp002320515	p__Firmicutes_C	5.6e-47	157.1	370	1	[[6, 383]]	7.8e-47	GUT_GENOME022350	MAG	CosteaPI_2017__SID713A023-11-0-0__bin.37	51.95	100671	2.3701	0.0163034
GUT_GENOME022350_01394	Carboxypeptidase G2	d__Bacteria;p__Firmicutes_C;c__Negativicutes;o__Veillonellales;f__Dialisteraceae;g__Dialister;s__Dialister sp002320515	p__Firmicutes_C	1.9e-15	53.2	273	1	[[2, 292]]	2.5e-15	GUT_GENOME022350	MAG	CosteaPI_2017__SID713A023-11-0-0__bin.37	51.95	100671	2.3701	0.0163034
GUT_GENOME019330_00999	Acetylornithine deacetylase	d__Bacteria;p__Actinobacteriota;c__Coriobacteriia;o__Coriobacteriales;f__Eggerthellaceae;g__Senegalimassilia;s__	p__Actinobacteriota	1.4e-08	30.4	253	1	[[1, 280]]	2.2e-08	GUT_GENOME019330	MAG	CM_madagascar__V53_02_1FE__bin.31	62.64	100643
GUT_GENOME020249_00047	putative succinyl-diaminopimelate desuccinylase	d__Bacteria;p__Actinobacteriota;c__Coriobacteriia;o__Coriobacteriales;f__Coriobacteriaceae;g__Collinsella;s__	p__Actinobacteriota	8e-12	41	320	1	[[8, 387]]	1e-11	GUT_GENOME020249	MAG	CosteaPI_2017__donald2-11-30-0__bin.6	60.09	100649
GUT_GENOME250360_00936	putative succinyl-diaminopimelate desuccinylase	d__Bacteria;p__Actinobacteriota;c__Coriobacteriia;o__Coriobacteriales;f__Coriobacteriaceae;g__Collinsella;s__	p__Actinobacteriota	6.8e-11	37.9	320	1	[[8, 388]]	8.2e-11	GUT_GENOME250360	MAG	WenC_2017__RA087__bin.33	60.4	103920
GUT_GENOME231418_00385	N-acetyldiaminopimelate deacetylase	d__Bacteria;p__Firmicutes_A;c__Clostridia;o__Tissierellales;f__Helcococcaceae;g__Anaerococcus;s__Anaerococcus sp900258475	p__Firmicutes_A	9.7e-09	30.8	228	1	[[68, 350]]	1.2e-08	GUT_GENOME231418	MAG	SRS335563_5	34.86	103369
GUT_GENOME225024_01133	Succinyl-diaminopimelate desuccinylase	d__Bacteria;p__Actinobacteriota;c__Actinobacteria;o__Actinomycetales;f__Actinomycetaceae;g__Actinobaculum;s__Actinobaculum massiliense	p__Actinobacteriota	5.2e-07	25.1	235	1	[[0, 249]]	8.7e-07	GUT_GENOME225024	MAG	SRS1735563_10	60.17	103314
GUT_GENOME124160_00547	putative succinyl-diaminopimelate desuccinylase	d__Bacteria;p__Actinobacteriota;c__Coriobacteriia;o__Coriobacteriales;f__Coriobacteriaceae;g__Collinsella;s__Collinsella sp002232035	p__Actinobacteriota	2e-10	36.2	302	1	[[9, 386]]	2.5e-10	GUT_GENOME124160	MAG	LiJ_2017__H3M419939__bin.39	60.89	102048
GUT_GENOME122723_00482	Carboxypeptidase G2	d__Bacteria;p__Firmicutes_A;c__Clostridia;o__Oscillospirales;f__Oscillospiraceae;g__Flavonifractor;s__	p__Firmicutes_A	1.2e-36	123	310	1	[[4, 388]]	1.5e-36	GUT_GENOME122723	MAG	LiJ_2017__H1M413822__bin.23	62.56	102035
GUT_GENOME122330_01177	putative succinyl-diaminopimelate desuccinylase	d__Bacteria;p__Actinobacteriota;c__Coriobacteriia;o__Coriobacteriales;f__Coriobacteriaceae;g__Collinsella;s__	p__Actinobacteriota	2.3e-11	39.5	266	1	[[10, 394]]	2.7e-11	GUT_GENOME122330	MAG	LiJ_2014__V1.UC58-4__bin.56	60.11	102032
GUT_GENOME147629_01273	Carboxypeptidase G2	d__Bacteria;p__Proteobacteria;c__Gammaproteobacteria;o__Cardiobacteriales;f__Cardiobacteriaceae;g__Cardiobacterium;s__Cardiobacterium valvarum	p__Proteobacteria	2.7e-63	211.2	379	1	[[0, 372]]	3.6e-63	GUT_GENOME147629	Isolate	PATRIC_797473_3	58.24	102541
GUT_GENOME147542_02127	Carboxypeptidase G2	d__Bacteria;p__Proteobacteria;c__Gammaproteobacteria;o__Enterobacterales;f__Enterobacteriaceae;g__Plesiomonas;s__Plesiomonas shigelloides	p__Proteobacteria	3.5e-64	214.4	378	1	[[1, 370]]	4.3e-64	GUT_GENOME147542	Isolate	PATRIC_703_26	51.92	102536
GUT_GENOME147522_02169	Carboxypeptidase G2	d__Bacteria;p__Proteobacteria;c__Gammaproteobacteria;o__Enterobacterales;f__Vibrionaceae;g__Grimontia;s__Grimontia hollisae	p__Proteobacteria	1.1e-59	199.8	381	1	[[1, 373]]	2.1e-59	GUT_GENOME147522	Isolate	PATRIC_673_10	49.53	102532
GUT_GENOME147598_00101	Acetylornithine deacetylase	d__Bacteria;p__Proteobacteria;c__Gammaproteobacteria;o__Enterobacterales;f__Enterobacteriaceae;g__Klebsiella;s__Klebsiella pneumoniae	p__Proteobacteria	1.5e-15	54.9	236	1	[[0, 281]]	1.8e-15	GUT_GENOME147598	Isolate	PATRIC_72407_78	57.3	102538	1.00273	0.0198249
GUT_GENOME147598_02613	putative succinyl-diaminopimelate desuccinylase	d__Bacteria;p__Proteobacteria;c__Gammaproteobacteria;o__Enterobacterales;f__Enterobacteriaceae;g__Klebsiella;s__Klebsiella pneumoniae	p__Proteobacteria	8e-10	36	234	1	[[36, 288]]	1.3e-09	GUT_GENOME147598	Isolate	PATRIC_72407_78	57.3	102538	1.00273	0.0198249
GUT_GENOME153266_01791	Succinyl-diaminopimelate desuccinylase	d__Bacteria;p__Actinobacteriota;c__Coriobacteriia;o__Coriobacteriales;f__Atopobiaceae;g__Olsenella_C;s__	p__Actinobacteriota	8.4e-11	37.7	382	1	[[6, 409]]	1.1e-10	GUT_GENOME153266	MAG	QinJ_2012__T2D-103__bin.15	65.6	102599
GUT_GENOME143747_01377	Carboxypeptidase G2	d__Bacteria;p__Proteobacteria;c__Gammaproteobacteria;o__Enterobacterales;f__Enterobacteriaceae;g__Enterobacter;s__Enterobacter cloacae	p__Proteobacteria	5.4e-54	181.4	382	1	[[6, 398]]	7.1e-54	GUT_GENOME143747	Isolate	PATRIC_550_1232	54.86	102500
GUT_GENOME008152_01932	putative succinyl-diaminopimelate desuccinylase	d__Bacteria;p__Firmicutes_A;c__Clostridia;o__Lachnospirales;f__Lachnospiraceae;g__;s__	p__Firmicutes_A	9.3e-15	51.1	237	1	[[57, 340]]	1.2e-14	GUT_GENOME008152	MAG	Bengtsson-PalmeJ_2015__TRAVELRES21__bin.29	52.05	100378
GUT_GENOME008152_02253	N-formyl-4-amino-5-aminomethyl-2-methylpyrimidine deformylase	d__Bacteria;p__Firmicutes_A;c__Clostridia;o__Lachnospirales;f__Lachnospiraceae;g__;s__	p__Firmicutes_A	2e-14	50	231	1	[[0, 258]]	3e-14	GUT_GENOME008152	MAG	Bengtsson-PalmeJ_2015__TRAVELRES21__bin.29	52.05	100378
GUT_GENOME008152_02071	putative hydrolase YxeP	d__Bacteria;p__Firmicutes_A;c__Clostridia;o__Lachnospirales;f__Lachnospiraceae;g__;s__	p__Firmicutes_A	1.8e-07	27	262	1	[[31, 314]]	3.4e-07	GUT_GENOME008152	MAG	Bengtsson-PalmeJ_2015__TRAVELRES21__bin.29	52.05	100378
GUT_GENOME004335_00863	putative succinyl-diaminopimelate desuccinylase	d__Bacteria;p__Actinobacteriota;c__Coriobacteriia;o__Coriobacteriales;f__Coriobacteriaceae;g__Collinsella;s__	p__Actinobacteriota	1.6e-09	33.4	264	1	[[9, 386]]	1.9e-09	GUT_GENOME004335	MAG	BackhedF_2015__SID345_4M__bin.17	60.16	100302
GUT_GENOME004807_00842	Succinyl-diaminopimelate desuccinylase	d__Bacteria;p__Actinobacteriota;c__Actinobacteria;o__Actinomycetales;f__Actinomycetaceae;g__Pauljensenia;s__Pauljensenia keddieii	p__Actinobacteriota	4.8e-11	38.5	230	1	[[1, 241]]	8.4e-11	GUT_GENOME004807	MAG	BackhedF_2015__SID397_4M__bin.4	65.25	100308
GUT_GENOME006314_00605	Succinyl-diaminopimelate desuccinylase	d__Bacteria;p__Firmicutes;c__Bacilli;o__Lactobacillales;f__Lactobacillaceae;g__Lactobacillus_G;s__Lactobacillus_G parabuchneri	p__Firmicutes	1.3e-12	44	253	2	[[0, 230], [291, 436]]	1e-10	GUT_GENOME006314	MAG	BackhedF_2015__SID589_B__bin.9	43.61	100330
GUT_GENOME006314_01589	putative succinyl-diaminopimelate desuccinylase	d__Bacteria;p__Firmicutes;c__Bacilli;o__Lactobacillales;f__Lactobacillaceae;g__Lactobacillus_G;s__Lactobacillus_G parabuchneri	p__Firmicutes	3.9e-09	32.5	230	2	[[46, 173], [173, 401]]	8.9e-05	GUT_GENOME006314	MAG	BackhedF_2015__SID589_B__bin.9	43.61	100330
GUT_GENOME283626_00987	Carboxypeptidase G2	d__Bacteria;p__Firmicutes_A;c__Clostridia;o__Lachnospirales;f__Lachnospiraceae;g__Coprococcus_A;s__	p__Firmicutes_A	3.2e-23	79	398	1	[[1, 391]]	4.6e-23	GUT_GENOME283626	MAG	ZellerG_2014__CCIS44743950ST-4-0__bin.40	43.92	104581	0.455789	0.00418979
GUT_GENOME283626_01739	putative succinyl-diaminopimelate desuccinylase	d__Bacteria;p__Firmicutes_A;c__Clostridia;o__Lachnospirales;f__Lachnospiraceae;g__Coprococcus_A;s__	p__Firmicutes_A	1.5e-16	57	293	1	[[38, 374]]	1.9e-16	GUT_GENOME283626	MAG	ZellerG_2014__CCIS44743950ST-4-0__bin.40	43.92	104581	0.455789	0.00418979
GUT_GENOME283626_01799	N-acetyl-lysine deacetylase	d__Bacteria;p__Firmicutes_A;c__Clostridia;o__Lachnospirales;f__Lachnospiraceae;g__Coprococcus_A;s__	p__Firmicutes_A	6.2e-10	35.2	310	1	[[43, 378]]	7.9e-10	GUT_GENOME283626	MAG	ZellerG_2014__CCIS44743950ST-4-0__bin.40	43.92	104581	0.455789	0.00418979
GUT_GENOME251472_00417	Acetylornithine deacetylase	d__Bacteria;p__Actinobacteriota;c__Coriobacteriia;o__Coriobacteriales;f__Coriobacteriaceae;g__Collinsella;s__	p__Actinobacteriota	1.1e-11	39.5	320	1	[[8, 388]]	1.4e-11	GUT_GENOME251472	MAG	XieH_2016__YSZC12003_35519__bin.75	59.94	103946
GUT_GENOME251543_01364	Acetylornithine deacetylase	d__Bacteria;p__Bacteroidota;c__Bacteroidia;o__Bacteroidales;f__Rikenellaceae;g__Alistipes;s__	p__Bacteroidota	2.7e-14	49.1	272	1	[[15, 319]]	3.5e-14	GUT_GENOME251543	MAG	XieH_2016__YSZC12003_35520__bin.7	59.01	103948
GUT_GENOME253083_01135	Acetylornithine deacetylase	d__Bacteria;p__Bacteroidota;c__Bacteroidia;o__Bacteroidales;f__UBA11471;g__UBA11471;s__	p__Bacteroidota	5.4e-12	41.8	237	1	[[28, 293]]	7.7e-12	GUT_GENOME253083	MAG	XieH_2016__YSZC12003_35740__bin.114	52.3	103994
GUT_GENOME239268_01210	Acetylornithine deacetylase	d__Bacteria;p__Bacteroidota;c__Bacteroidia;o__Bacteroidales;f__Bacteroidaceae;g__Prevotellamassilia;s__	p__Bacteroidota	1e-13	47.4	236	1	[[13, 292]]	1.4e-13	GUT_GENOME239268	MAG	SRS820628_41	57.44	103674
GUT_GENOME022136_00092	putative hydrolase YxeP	d__Bacteria;p__Firmicutes_A;c__Clostridia;o__Peptostreptococcales;f__Anaerovoracaceae;g__CAG-145;s__	p__Firmicutes_A	8.2e-06	21.6	236	1	[[39, 323]]	1.2e-05	GUT_GENOME022136	MAG	CosteaPI_2017__SID713A013-11-0-0__bin.1	50.11	100668	0.182315	0.00493252
GUT_GENOME018753_00785	Carboxypeptidase G2	d__Bacteria;p__Firmicutes_A;c__Clostridia;o__Oscillospirales;f__CAG-382;g__;s__	p__Firmicutes_A	1.1e-32	109.6	394	1	[[1, 383]]	1.4e-32	GUT_GENOME018753	MAG	CM_madagascar__A89_01_1FE__bin.30	53.78	100615	0.182315	0.00909784
GUT_GENOME020414_02160	Acetylornithine deacetylase	d__Bacteria;p__Firmicutes_A;c__Clostridia;o__Lachnospirales;f__Lachnospiraceae;g__Clostridium_M;s__	p__Firmicutes_A	4.8e-07	25.8	267	1	[[83, 402]]	6.7e-07	GUT_GENOME020414	MAG	CosteaPI_2017__donald4-11-7-0__bin.41	48.22	100650
GUT_GENOME020414_00403	Hippurate hydrolase	d__Bacteria;p__Firmicutes_A;c__Clostridia;o__Lachnospirales;f__Lachnospiraceae;g__Clostridium_M;s__	p__Firmicutes_A	1.4e-06	24.3	273	1	[[30, 347]]	1.8e-06	GUT_GENOME020414	MAG	CosteaPI_2017__donald4-11-7-0__bin.41	48.22	100650
GUT_GENOME021289_00104	Acetylornithine deacetylase	d__Bacteria;p__Proteobacteria;c__Gammaproteobacteria;o__Pseudomonadales;f__Pseudomonadaceae;g__Pseudomonas_E;s__Pseudomonas_E fragi_B	p__Proteobacteria	3.2e-08	30.4	249	1	[[40, 342]]	4.8e-08	GUT_GENOME021289	MAG	CosteaPI_2017__peacemaker4-11-0-0__bin.46	58.57	100657
GUT_GENOME001245_01042	putative succinyl-diaminopimelate desuccinylase	d__Bacteria;p__Actinobacteriota;c__Coriobacteriia;o__Coriobacteriales;f__Coriobacteriaceae;g__Collinsella;s__	p__Actinobacteriota	6.6e-11	38.1	266	1	[[9, 388]]	8e-11	GUT_GENOME001245	Isolate	AF37-9	59.72	100210
GUT_GENOME002738_02127	Acetylornithine deacetylase	d__Bacteria;p__Bacteroidota;c__Bacteroidia;o__Bacteroidales;f__Bacteroidaceae;g__Prevotella;s__Prevotella buccae	p__Bacteroidota	5.3e-18	61.8	245	1	[[39, 309]]	6.7e-18	GUT_GENOME002738	MAG	BackhedF_2015__SID180_12M__bin.10	51.55	100289	0.0911577	0.0143427
GUT_GENOME188728_00789	Peptidase T	d__Bacteria;p__Firmicutes_C;c__Negativicutes;o__Acidaminococcales;f__Acidaminococcaceae;g__Succiniclasticum;s__	p__Firmicutes_C	2.8e-24	82.1	289	1	[[3, 347]]	3.4e-24	GUT_GENOME188728	MAG	SRR5056662_bin.34	47.56	102969	0.273473	0.0113214
GUT_GENOME179954_01753	putative succinyl-diaminopimelate desuccinylase	d__Bacteria;p__Actinobacteriota;c__Coriobacteriia;o__Coriobacteriales;f__Coriobacteriaceae;g__Collinsella;s__Collinsella aerofaciens_F	p__Actinobacteriota	1.1e-11	40.8	306	1	[[9, 386]]	1.3e-11	GUT_GENOME179954	MAG	SRR3737007_bin.23	59.98	102919
GUT_GENOME248086_01186	Carboxypeptidase G2	d__Bacteria;p__Proteobacteria;c__Gammaproteobacteria;o__Burkholderiales;f__Burkholderiaceae;g__Sutterella;s__	p__Proteobacteria	6.6e-44	146.9	374	1	[[1, 368]]	8.6e-44	GUT_GENOME248086	MAG	WenC_2017__N035__bin.66	62.11	103901
GUT_GENOME248086_00834	Carboxypeptidase G2	d__Bacteria;p__Proteobacteria;c__Gammaproteobacteria;o__Burkholderiales;f__Burkholderiaceae;g__Sutterella;s__	p__Proteobacteria	2.7e-38	128.4	376	1	[[3, 370]]	3.6e-38	GUT_GENOME248086	MAG	WenC_2017__N035__bin.66	62.11	103901
GUT_GENOME248086_00427	N-acetyl-lysine deacetylase	d__Bacteria;p__Proteobacteria;c__Gammaproteobacteria;o__Burkholderiales;f__Burkholderiaceae;g__Sutterella;s__	p__Proteobacteria	4.3e-10	35.4	310	1	[[58, 410]]	5.5e-10	GUT_GENOME248086	MAG	WenC_2017__N035__bin.66	62.11	103901
GUT_GENOME248086_01789	N-acetyldiaminopimelate deacetylase	d__Bacteria;p__Proteobacteria;c__Gammaproteobacteria;o__Burkholderiales;f__Burkholderiaceae;g__Sutterella;s__	p__Proteobacteria	2.9e-06	22.8	228	1	[[30, 296]]	4.3e-06	GUT_GENOME248086	MAG	WenC_2017__N035__bin.66	62.11	103901
GUT_GENOME001738_00361	Peptidase T	d__Bacteria;p__Firmicutes;c__Bacilli;o__Exiguobacterales;f__Exiguobacteraceae;g__Exiguobacterium;s__	p__Firmicutes	4.2e-13	46.1	323	1	[[1, 339]]	5.2e-13	GUT_GENOME001738	Isolate	AM39-5BH	51.21	100264
GUT_GENOME001400_01084	putative succinyl-diaminopimelate desuccinylase	d__Bacteria;p__Actinobacteriota;c__Coriobacteriia;o__Coriobacteriales;f__Coriobacteriaceae;g__Collinsella;s__	p__Actinobacteriota	8.7e-11	37.7	330	1	[[8, 392]]	1.1e-10	GUT_GENOME001400	Isolate	AM16-21	59.95	100232
GUT_GENOME111584_01774	putative hydrolase YxeP	d__Bacteria;p__Firmicutes_A;c__Clostridia;o__Lachnospirales;f__Lachnospiraceae;g__TF01-11;s__TF01-11 sp000436755	p__Firmicutes_A	3.3e-11	40	260	1	[[33, 316]]	7.2e-11	GUT_GENOME111584	MAG	LeChatelierE_2013__MH0236__bin.49	35.99	101831	2.73473	0.00871581
GUT_GENOME128621_00584	putative succinyl-diaminopimelate desuccinylase	d__Bacteria;p__Actinobacteriota;c__Coriobacteriia;o__Coriobacteriales;f__Coriobacteriaceae;g__Collinsella;s__	p__Actinobacteriota	2.2e-11	39.6	320	1	[[8, 388]]	2.9e-11	GUT_GENOME128621	MAG	LiuW_2016__SRR3993018__bin.31	59.72	102111
GUT_GENOME232008_01217	Carboxypeptidase G2	d__Bacteria;p__Proteobacteria;c__Gammaproteobacteria;o__Enterobacterales;f__Enterobacteriaceae;g__Pantoea;s__Pantoea ananatis	p__Proteobacteria	2.2e-56	189.2	382	1	[[0, 370]]	2.8e-56	GUT_GENOME232008	MAG	SRS372949_2	53.53	103393
GUT_GENOME232008_01009	putative hydrolase YxeP	d__Bacteria;p__Proteobacteria;c__Gammaproteobacteria;o__Enterobacterales;f__Enterobacteriaceae;g__Pantoea;s__Pantoea ananatis	p__Proteobacteria	2e-11	41	270	1	[[86, 371]]	2.5e-11	GUT_GENOME232008	MAG	SRS372949_2	53.53	103393
GUT_GENOME232008_04466	Acetylornithine deacetylase	d__Bacteria;p__Proteobacteria;c__Gammaproteobacteria;o__Enterobacterales;f__Enterobacteriaceae;g__Pantoea;s__Pantoea ananatis	p__Proteobacteria	1.7e-09	34.7	235	1	[[39, 294]]	2.4e-09	GUT_GENOME232008	MAG	SRS372949_2	53.53	103393
GUT_GENOME232008_02335	Hippurate hydrolase	d__Bacteria;p__Proteobacteria;c__Gammaproteobacteria;o__Enterobacterales;f__Enterobacteriaceae;g__Pantoea;s__Pantoea ananatis	p__Proteobacteria	4.2e-06	23.5	235	1	[[22, 307]]	6.3e-06	GUT_GENOME232008	MAG	SRS372949_2	53.53	103393
GUT_GENOME231806_03284	Carboxypeptidase G2	d__Bacteria;p__Proteobacteria;c__Gammaproteobacteria;o__Pseudomonadales;f__Pseudomonadaceae;g__;s__	p__Proteobacteria	9.3e-182	602.4	399	1	[[2, 413]]	1.1e-181	GUT_GENOME231806	MAG	SRS372576_1	64.13	103387
GUT_GENOME113641_01816	[LysW]-lysine hydrolase	d__Bacteria;p__Firmicutes_A;c__Clostridia;o__Oscillospirales;f__Butyricicoccaceae;g__;s__	p__Firmicutes_A	7.7e-08	28.1	296	1	[[56, 369]]	1e-07	GUT_GENOME113641	MAG	LeChatelierE_2013__MH0433__bin.100	48	101891
GUT_GENOME113208_00922	Carboxypeptidase G2	d__Bacteria;p__Firmicutes_C;c__Negativicutes;o__Veillonellales;f__Dialisteraceae;g__UBA1822;s__UBA1822 sp002314995	p__Firmicutes_C	4.4e-52	173.4	393	1	[[1, 383]]	5.2e-52	GUT_GENOME113208	MAG	LeChatelierE_2013__MH0421__bin.14	57.82	101877	1.45852	0.0187031
GUT_GENOME113208_00923	Carboxypeptidase G2	d__Bacteria;p__Firmicutes_C;c__Negativicutes;o__Veillonellales;f__Dialisteraceae;g__UBA1822;s__UBA1822 sp002314995	p__Firmicutes_C	4e-47	157.1	377	1	[[4, 387]]	5.2e-47	GUT_GENOME113208	MAG	LeChatelierE_2013__MH0421__bin.14	57.82	101877	1.45852	0.0187031
GUT_GENOME113208_00925	Peptidase T	d__Bacteria;p__Firmicutes_C;c__Negativicutes;o__Veillonellales;f__Dialisteraceae;g__UBA1822;s__UBA1822 sp002314995	p__Firmicutes_C	1.2e-25	86.3	256	1	[[11, 278]]	1.6e-25	GUT_GENOME113208	MAG	LeChatelierE_2013__MH0421__bin.14	57.82	101877	1.45852	0.0187031
GUT_GENOME113208_00692	Peptidase T	d__Bacteria;p__Firmicutes_C;c__Negativicutes;o__Veillonellales;f__Dialisteraceae;g__UBA1822;s__UBA1822 sp002314995	p__Firmicutes_C	6e-21	70.8	268	1	[[2, 273]]	8.2e-21	GUT_GENOME113208	MAG	LeChatelierE_2013__MH0421__bin.14	57.82	101877	1.45852	0.0187031
GUT_GENOME113208_01207	Peptidase T	d__Bacteria;p__Firmicutes_C;c__Negativicutes;o__Veillonellales;f__Dialisteraceae;g__UBA1822;s__UBA1822 sp002314995	p__Firmicutes_C	3.5e-20	68.2	278	1	[[0, 313]]	4.4e-20	GUT_GENOME113208	MAG	LeChatelierE_2013__MH0421__bin.14	57.82	101877	1.45852	0.0187031
GUT_GENOME161643_01728	Acetylornithine deacetylase	d__Bacteria;p__Actinobacteriota;c__Coriobacteriia;o__Coriobacteriales;f__Coriobacteriaceae;g__Collinsella;s__	p__Actinobacteriota	2.1e-09	33	256	1	[[9, 295]]	2.7e-09	GUT_GENOME161643	MAG	SchirmerM_2016__G88939__bin.18	60.11	102740
GUT_GENOME160029_00765	putative succinyl-diaminopimelate desuccinylase	d__Bacteria;p__Actinobacteriota;c__Coriobacteriia;o__Coriobacteriales;f__Coriobacteriaceae;g__Collinsella;s__Collinsella aerofaciens_F	p__Actinobacteriota	4.7e-12	41.1	321	1	[[8, 393]]	5.7e-12	GUT_GENOME160029	MAG	SchirmerM_2016__G88745__bin.32	59.91	102729
GUT_GENOME112210_02034	putative hydrolase YxeP	d__Bacteria;p__Firmicutes_A;c__Clostridia;o__Lachnospirales;f__Lachnospiraceae;g__Eubacterium_F;s__Eubacterium_F sp000433735	p__Firmicutes_A	2.4e-09	33.1	263	1	[[22, 313]]	3.7e-09	GUT_GENOME112210	MAG	LeChatelierE_2013__MH0292__bin.17	43.81	101848	1.732	0.00724593
GUT_GENOME113005_01558	Carboxypeptidase G2	d__Bacteria;p__Firmicutes_C;c__Negativicutes;o__Acidaminococcales;f__Acidaminococcaceae;g__Phascolarctobacterium;s__	p__Firmicutes_C	2.6e-55	184.5	382	1	[[3, 385]]	3.1e-55	GUT_GENOME113005	MAG	LeChatelierE_2013__MH0415__bin.48	43.65	101870
GUT_GENOME113005_01555	Carboxypeptidase G2	d__Bacteria;p__Firmicutes_C;c__Negativicutes;o__Acidaminococcales;f__Acidaminococcaceae;g__Phascolarctobacterium;s__	p__Firmicutes_C	1.4e-52	175.5	387	1	[[1, 385]]	1.6e-52	GUT_GENOME113005	MAG	LeChatelierE_2013__MH0415__bin.48	43.65	101870
GUT_GENOME113005_01017	Carboxypeptidase G2	d__Bacteria;p__Firmicutes_C;c__Negativicutes;o__Acidaminococcales;f__Acidaminococcaceae;g__Phascolarctobacterium;s__	p__Firmicutes_C	2.1e-46	155.1	382	2	[[4, 250], [254, 409]]	3e-36	GUT_GENOME113005	MAG	LeChatelierE_2013__MH0415__bin.48	43.65	101870
GUT_GENOME113005_00852	Peptidase T	d__Bacteria;p__Firmicutes_C;c__Negativicutes;o__Acidaminococcales;f__Acidaminococcaceae;g__Phascolarctobacterium;s__	p__Firmicutes_C	1.5e-18	63.3	258	1	[[0, 357]]	1.7e-18	GUT_GENOME113005	MAG	LeChatelierE_2013__MH0415__bin.48	43.65	101870
GUT_GENOME113005_00092	Peptidase T	d__Bacteria;p__Firmicutes_C;c__Negativicutes;o__Acidaminococcales;f__Acidaminococcaceae;g__Phascolarctobacterium;s__	p__Firmicutes_C	1.2e-14	50.4	276	1	[[2, 328]]	1.5e-14	GUT_GENOME113005	MAG	LeChatelierE_2013__MH0415__bin.48	43.65	101870
GUT_GENOME113687_00356	Succinyl-diaminopimelate desuccinylase	d__Bacteria;p__Proteobacteria;c__Alphaproteobacteria;o__RF32;f__CAG-239;g__CAG-495;s__	p__Proteobacteria	1.6e-07	26.8	308	1	[[49, 366]]	2.6e-07	GUT_GENOME113687	MAG	LeChatelierE_2013__MH0433__bin.95	47.21	101894
GUT_GENOME113610_00556	Acetylornithine deacetylase	d__Bacteria;p__Proteobacteria;c__Gammaproteobacteria;o__Enterobacterales;f__Succinivibrionaceae;g__Succinatimonas;s__	p__Proteobacteria	6e-12	41.5	272	1	[[3, 295]]	9.7e-12	GUT_GENOME113610	MAG	LeChatelierE_2013__MH0432__bin.20	40.91	101890
GUT_GENOME067136_00586	Peptidase T	d__Bacteria;p__Firmicutes_A;c__Clostridia;o__Lachnospirales;f__Lachnospiraceae;g__CAG-56;s__	p__Firmicutes_A	2.5e-10	36.5	255	1	[[1, 274]]	3.6e-10	GUT_GENOME067136	MAG	ERS235548_25	48.38	101027	0.0911577	0.0171712
GUT_GENOME239663_02631	p-aminobenzoyl-glutamate hydrolase subunit B	d__Bacteria;p__Firmicutes_A;c__Clostridia;o__Oscillospirales;f__Ruminococcaceae;g__Ruthenibacterium;s__Ruthenibacterium lactatiformans	p__Firmicutes_A	3.5e-10	36.6	260	1	[[9, 311]]	5.1e-10	GUT_GENOME239663	Isolate	TF05-17AC	57.05	103682	4.46673	0.00940209
GUT_GENOME239663_02851	putative hydrolase YxeP	d__Bacteria;p__Firmicutes_A;c__Clostridia;o__Oscillospirales;f__Ruminococcaceae;g__Ruthenibacterium;s__Ruthenibacterium lactatiformans	p__Firmicutes_A	3e-06	23.7	255	1	[[34, 310]]	4.1e-06	GUT_GENOME239663	Isolate	TF05-17AC	57.05	103682	4.46673	0.00940209
GUT_GENOME137467_00961	putative succinyl-diaminopimelate desuccinylase	d__Bacteria;p__Actinobacteriota;c__Coriobacteriia;o__Coriobacteriales;f__Coriobacteriaceae;g__Collinsella;s__	p__Actinobacteriota	8.1e-10	34.4	265	1	[[9, 382]]	9.7e-10	GUT_GENOME137467	MAG	NielsenHB_2014__V1_UC17_2__bin.39	60	102198
GUT_GENOME286389_00206	Acetylornithine deacetylase	d__Bacteria;p__Bacteroidota;c__Bacteroidia;o__Bacteroidales;f__Bacteroidaceae;g__Prevotella;s__	p__Bacteroidota	1.7e-12	43.5	268	1	[[26, 309]]	2.3e-12	GUT_GENOME286389	MAG	ZellerG_2014__CCMD63399960ST-21-0__bin.61	51.72	104640	0.182315	0.0977948
GUT_GENOME286122_00515	Carboxypeptidase G2	d__Bacteria;p__Proteobacteria;c__Gammaproteobacteria;o__Burkholderiales;f__Burkholderiaceae;g__Duodenibacillus;s__	p__Proteobacteria	1.3e-41	138.8	369	1	[[3, 369]]	1.8e-41	GUT_GENOME286122	MAG	ZellerG_2014__CCMD42428553ST-21-0__bin.46	52.69	104637	0.0911577	0.00791222
GUT_GENOME153023_00627	putative succinyl-diaminopimelate desuccinylase	d__Bacteria;p__Firmicutes;c__Bacilli;o__Lactobacillales;f__Lactobacillaceae;g__Lactobacillus_H;s__	p__Firmicutes	8.1e-21	70.3	314	1	[[19, 379]]	1e-20	GUT_GENOME153023	MAG	QinJ_2012__T2D-092__bin.16	39.42	102593
GUT_GENOME148897_01339	Putative succinyl-diaminopimelate desuccinylase DapE	d__Bacteria;p__Bacteroidota;c__Bacteroidia;o__Bacteroidales;f__Muribaculaceae;g__CAG-279;s__CAG-279 sp000437795	p__Bacteroidota	1.6e-16	56.8	234	1	[[22, 288]]	2.1e-16	GUT_GENOME148897	MAG	QinJ_2012__CON-066__bin.34	49.9	102556	4.7402	0.0245775
GUT_GENOME146010_03726	Carboxypeptidase G2	d__Bacteria;p__Proteobacteria;c__Gammaproteobacteria;o__Enterobacterales;f__Enterobacteriaceae;g__Metakosakonia;s__Metakosakonia intermedia	p__Proteobacteria	1.1e-51	174.2	378	1	[[1, 370]]	1.4e-51	GUT_GENOME146010	Isolate	PATRIC_61648_5	52.47	102521
GUT_GENOME146010_02885	Acetylornithine deacetylase	d__Bacteria;p__Proteobacteria;c__Gammaproteobacteria;o__Enterobacterales;f__Enterobacteriaceae;g__Metakosakonia;s__Metakosakonia intermedia	p__Proteobacteria	5e-14	50	247	1	[[5, 301]]	6.7e-14	GUT_GENOME146010	Isolate	PATRIC_61648_5	52.47	102521
GUT_GENOME257679_02152	Acetylornithine deacetylase	d__Bacteria;p__Proteobacteria;c__Gammaproteobacteria;o__Burkholderiales;f__Burkholderiaceae;g__Comamonas;s__Comamonas kerstersii	p__Proteobacteria	1.3e-07	27.9	260	1	[[16, 311]]	1.9e-07	GUT_GENOME257679	MAG	XieH_2016__YSZC12003_37197R1__bin.26	59.62	104150
GUT_GENOME257679_00875	Acetylornithine deacetylase	d__Bacteria;p__Proteobacteria;c__Gammaproteobacteria;o__Burkholderiales;f__Burkholderiaceae;g__Comamonas;s__Comamonas kerstersii	p__Proteobacteria	1.5e-07	27.7	231	1	[[2, 225]]	2.5e-07	GUT_GENOME257679	MAG	XieH_2016__YSZC12003_37197R1__bin.26	59.62	104150
GUT_GENOME258883_00119	Putative succinyl-diaminopimelate desuccinylase DapE	d__Bacteria;p__Bacteroidota;c__Bacteroidia;o__Bacteroidales;f__Bacteroidaceae;g__Bacteroides;s__	p__Bacteroidota	2.3e-11	40.1	229	1	[[32, 314]]	2.9e-11	GUT_GENOME258883	MAG	XieH_2016__YSZC12003_37277__bin.91	50.75	104188	0.0911577	0.0110489
GUT_GENOME226303_01867	Acetylornithine deacetylase	d__Bacteria;p__Bacteroidota;c__Bacteroidia;o__Bacteroidales;f__Bacteroidaceae;g__Prevotella;s__	p__Bacteroidota	5.1e-14	48.4	247	1	[[58, 308]]	7.3e-14	GUT_GENOME226303	MAG	SRS259472_17	48.44	103332
GUT_GENOME232192_02642	Acetylornithine deacetylase	d__Bacteria;p__Proteobacteria;c__Gammaproteobacteria;o__Enterobacterales;f__Enterobacteriaceae;g__Serratia;s__Serratia ureilytica	p__Proteobacteria	5.7e-15	52.8	231	1	[[1, 251]]	7.7e-15	GUT_GENOME232192	MAG	SRS383481_1	59.76	103399
GUT_GENOME231559_02241	Acetylornithine deacetylase	d__Bacteria;p__Proteobacteria;c__Gammaproteobacteria;o__Enterobacterales;f__Enterobacteriaceae;g__Metakosakonia;s__Metakosakonia sp002377245	p__Proteobacteria	3.1e-14	50.4	231	1	[[1, 269]]	4.1e-14	GUT_GENOME231559	MAG	SRS371465_5	53.4	103377
GUT_GENOME096414_03603	Peptidase T	d__Bacteria;p__Firmicutes_A;c__Clostridia;o__Peptostreptococcales;f__Peptostreptococcaceae;g__Romboutsia;s__Romboutsia dakarense	p__Firmicutes_A	5.9e-20	68.9	386	1	[[1, 371]]	7.4e-20	GUT_GENOME096414	Isolate	GCF_000499525	27.98	101460
GUT_GENOME096289_00620	Carboxypeptidase G2	d__Bacteria;p__Proteobacteria;c__Gammaproteobacteria;o__Burkholderiales;f__Burkholderiaceae;g__Noviherbaspirillum;s__Noviherbaspirillum massiliense	p__Proteobacteria	6.5e-122	405	403	1	[[2, 417]]	7.6e-122	GUT_GENOME096289	Isolate	GCF_000312045	59.97	101417
GUT_GENOME096276_02176	Carboxypeptidase G2	d__Bacteria;p__Proteobacteria;c__Gammaproteobacteria;o__Burkholderiales;f__Burkholderiaceae;g__Sutterella;s__Sutterella wadsworthensis_A	p__Proteobacteria	3.1e-33	112	379	1	[[3, 371]]	4.5e-33	GUT_GENOME096276	Isolate	GCF_000297775	61.6	101410	13.856	0.0117756
GUT_GENOME096428_02181	Peptidase T	d__Bacteria;p__Firmicutes_A;c__Clostridia;o__Oscillospirales;f__Acutalibacteraceae;g__Clostridium_E;s__Clostridium_E jeddahense	p__Firmicutes_A	5.3e-16	55.7	261	1	[[1, 271]]	7.2e-16	GUT_GENOME096428	Isolate	GCF_000577335	51.86	101467
GUT_GENOME096428_00434	N-acetyl-lysine deacetylase	d__Bacteria;p__Firmicutes_A;c__Clostridia;o__Oscillospirales;f__Acutalibacteraceae;g__Clostridium_E;s__Clostridium_E jeddahense	p__Firmicutes_A	8.4e-07	25.4	306	1	[[65, 376]]	1.2e-06	GUT_GENOME096428	Isolate	GCF_000577335	51.86	101467
GUT_GENOME096473_02024	Acetylornithine deacetylase	d__Bacteria;p__Bacteroidota;c__Bacteroidia;o__Bacteroidales;f__Tannerellaceae;g__Parabacteroides;s__Parabacteroides goldsteinii	p__Bacteroidota	2.6e-10	37.5	238	1	[[23, 306]]	3.3e-10	GUT_GENOME096473	Isolate	GCF_000969835	43.35	101489	1.82315	0.0113703
GUT_GENOME096300_03394	Peptidase T	d__Bacteria;p__Firmicutes;c__Bacilli;o__Bacillales;f__Bacillaceae_A;g__Bacillus_AD;s__Bacillus_AD massilioanorexius	p__Firmicutes	4.7e-16	56.3	277	1	[[1, 334]]	6.1e-16	GUT_GENOME096300	Isolate	GCF_000321185	34.1	101428
GUT_GENOME096300_02935	Hippurate hydrolase	d__Bacteria;p__Firmicutes;c__Bacilli;o__Bacillales;f__Bacillaceae_A;g__Bacillus_AD;s__Bacillus_AD massilioanorexius	p__Firmicutes	1e-13	48.6	249	1	[[88, 371]]	1.4e-13	GUT_GENOME096300	Isolate	GCF_000321185	34.1	101428
GUT_GENOME096300_02831	Succinyl-diaminopimelate desuccinylase	d__Bacteria;p__Firmicutes;c__Bacilli;o__Bacillales;f__Bacillaceae_A;g__Bacillus_AD;s__Bacillus_AD massilioanorexius	p__Firmicutes	3.3e-12	43.6	306	1	[[3, 323]]	5e-12	GUT_GENOME096300	Isolate	GCF_000321185	34.1	101428
GUT_GENOME249991_00619	putative succinyl-diaminopimelate desuccinylase	d__Bacteria;p__Actinobacteriota;c__Coriobacteriia;o__Coriobacteriales;f__Coriobacteriaceae;g__Collinsella;s__	p__Actinobacteriota	4.7e-11	37.9	320	1	[[8, 388]]	5.7e-11	GUT_GENOME249991	MAG	WenC_2017__RA054__bin.10	61.07	103917
GUT_GENOME252836_00425	putative succinyl-diaminopimelate desuccinylase	d__Bacteria;p__Actinobacteriota;c__Coriobacteriia;o__Coriobacteriales;f__Coriobacteriaceae;g__Collinsella;s__Collinsella aerofaciens_F	p__Actinobacteriota	5.6e-10	34.9	267	1	[[10, 393]]	6.8e-10	GUT_GENOME252836	MAG	XieH_2016__YSZC12003_35708__bin.70	60.32	103983
GUT_GENOME249374_01479	Carboxypeptidase G2	d__Bacteria;p__Firmicutes_A;c__Clostridia;o__Oscillospirales;f__Oscillospiraceae;g__Oscillibacter;s__	p__Firmicutes_A	8.8e-35	117.1	320	1	[[6, 387]]	1.1e-34	GUT_GENOME249374	MAG	WenC_2017__RA011__bin.7	59.28	103910
GUT_GENOME249374_01478	Carboxypeptidase G2	d__Bacteria;p__Firmicutes_A;c__Clostridia;o__Oscillospirales;f__Oscillospiraceae;g__Oscillibacter;s__	p__Firmicutes_A	1.2e-33	113.3	367	1	[[1, 384]]	1.5e-33	GUT_GENOME249374	MAG	WenC_2017__RA011__bin.7	59.28	103910
GUT_GENOME249374_00507	Carboxypeptidase G2	d__Bacteria;p__Firmicutes_A;c__Clostridia;o__Oscillospirales;f__Oscillospiraceae;g__Oscillibacter;s__	p__Firmicutes_A	2.6e-13	46.3	301	1	[[0, 366]]	2.9e-13	GUT_GENOME249374	MAG	WenC_2017__RA011__bin.7	59.28	103910
GUT_GENOME252977_01046	Succinyl-diaminopimelate desuccinylase	d__Bacteria;p__Bacteroidota;c__Bacteroidia;o__Bacteroidales;f__Rikenellaceae;g__Alistipes;s__Alistipes sp002161445	p__Bacteroidota	9.7e-10	34.3	244	1	[[3, 296]]	1.2e-09	GUT_GENOME252977	MAG	XieH_2016__YSZC12003_35733__bin.79	61.07	103989	0.0911577	0.0131363
GUT_GENOME110949_00456	Acetylornithine deacetylase	d__Bacteria;p__Actinobacteriota;c__Coriobacteriia;o__Coriobacteriales;f__QAMH01;g__QAMH01;s__	p__Actinobacteriota	1.3e-21	73.2	284	1	[[0, 331]]	1.5e-21	GUT_GENOME110949	MAG	LeChatelierE_2013__MH0197__bin.24	62.91	101816	0.0911577	0.00536767
GUT_GENOME007936_01495	putative succinyl-diaminopimelate desuccinylase	d__Bacteria;p__Firmicutes_A;c__Clostridia;o__Oscillospirales;f__Oscillospiraceae;g__F23-B02;s__	p__Firmicutes_A	2.5e-17	59.1	258	1	[[11, 378]]	2.9e-17	GUT_GENOME007936	MAG	Bengtsson-PalmeJ_2015__TRAVELRES18__bin.42	53.8	100368	0.182315	0.0287904
GUT_GENOME007443_02420	Acetylornithine deacetylase	d__Bacteria;p__Bacteroidota;c__Bacteroidia;o__Bacteroidales;f__Marinifilaceae;g__Odoribacter;s__	p__Bacteroidota	2.2e-14	50.3	242	1	[[17, 294]]	2.7e-14	GUT_GENOME007443	MAG	Bengtsson-PalmeJ_2015__TRAVELRES10__bin.40	41.08	100343	0.364631	0.00829968
GUT_GENOME001587_03302	Carboxypeptidase G2	d__Bacteria;p__Firmicutes_A;c__Clostridia;o__Lachnospirales;f__Lachnospiraceae;g__Fusicatenibacter;s__Fusicatenibacter saccharivorans	p__Firmicutes_A	1.2e-35	120.5	375	1	[[1, 384]]	1.6e-35	GUT_GENOME001587	Isolate	AM28-10	47.09	100251	82.4066	0.0215815
GUT_GENOME001587_03304	Peptidase T	d__Bacteria;p__Firmicutes_A;c__Clostridia;o__Lachnospirales;f__Lachnospiraceae;g__Fusicatenibacter;s__Fusicatenibacter saccharivorans	p__Firmicutes_A	3.9e-12	43	304	1	[[0, 366]]	4.2e-12	GUT_GENOME001587	Isolate	AM28-10	47.09	100251	82.4066	0.0215815
GUT_GENOME001587_01388	Peptidase T	d__Bacteria;p__Firmicutes_A;c__Clostridia;o__Lachnospirales;f__Lachnospiraceae;g__Fusicatenibacter;s__Fusicatenibacter saccharivorans	p__Firmicutes_A	2.7e-09	33.6	260	1	[[3, 360]]	3.8e-09	GUT_GENOME001587	Isolate	AM28-10	47.09	100251	82.4066	0.0215815
GUT_GENOME001638_00513	N-acetyl-lysine deacetylase	d__Bacteria;p__Actinobacteriota;c__Coriobacteriia;o__Coriobacteriales;f__Atopobiaceae;g__Olsenella_B;s__Olsenella_B sp000752675	p__Actinobacteriota	5.2e-12	41.9	278	1	[[39, 360]]	6.8e-12	GUT_GENOME001638	Isolate	AM30-3LB	62.46	100256
GUT_GENOME001638_00137	Acetylornithine deacetylase	d__Bacteria;p__Actinobacteriota;c__Coriobacteriia;o__Coriobacteriales;f__Atopobiaceae;g__Olsenella_B;s__Olsenella_B sp000752675	p__Actinobacteriota	9.4e-11	37.8	261	1	[[46, 373]]	1.2e-10	GUT_GENOME001638	Isolate	AM30-3LB	62.46	100256
GUT_GENOME001316_01702	Putative succinyl-diaminopimelate desuccinylase DapE	d__Bacteria;p__Bacteroidota;c__Bacteroidia;o__Bacteroidales;f__Tannerellaceae;g__Parabacteroides;s__Parabacteroides bouchesdurhonensis	p__Bacteroidota	3.7e-10	36.2	231	1	[[40, 304]]	4.8e-10	GUT_GENOME001316	Isolate	AM07-16	40.48	100221
GUT_GENOME001312_00034	putative succinyl-diaminopimelate desuccinylase	d__Bacteria;p__Firmicutes_A;c__Clostridia;o__Eubacteriales;f__Eubacteriaceae;g__Eubacterium;s__Eubacterium limosum_A	p__Firmicutes_A	5.3e-07	26.3	236	1	[[26, 312]]	6.9e-07	GUT_GENOME001312	Isolate	AM05-23	47.57	100219
GUT_GENOME257450_01291	Putative succinyl-diaminopimelate desuccinylase DapE	d__Bacteria;p__Firmicutes_A;c__Clostridia;o__Oscillospirales;f__Ruminococcaceae;g__Ruthenibacterium;s__Ruthenibacterium sp003149955	p__Firmicutes_A	1e-11	41.2	314	1	[[48, 377]]	1.3e-11	GUT_GENOME257450	MAG	XieH_2016__YSZC12003_37191R1__bin.19	58.44	104143
GUT_GENOME257450_00894	Succinyl-diaminopimelate desuccinylase	d__Bacteria;p__Firmicutes_A;c__Clostridia;o__Oscillospirales;f__Ruminococcaceae;g__Ruthenibacterium;s__Ruthenibacterium sp003149955	p__Firmicutes_A	2.9e-10	36.3	243	2	[[2, 231], [308, 435]]	1.6e-06	GUT_GENOME257450	MAG	XieH_2016__YSZC12003_37191R1__bin.19	58.44	104143
GUT_GENOME258848_01655	putative succinyl-diaminopimelate desuccinylase	d__Bacteria;p__Actinobacteriota;c__Coriobacteriia;o__Coriobacteriales;f__Coriobacteriaceae;g__Collinsella;s__Collinsella aerofaciens_F	p__Actinobacteriota	3.6e-12	42.1	320	1	[[8, 383]]	4.5e-12	GUT_GENOME258848	MAG	XieH_2016__YSZC12003_37277__bin.29	59.89	104186
GUT_GENOME281389_00941	Acetylornithine deacetylase	d__Bacteria;p__Proteobacteria;c__Alphaproteobacteria;o__RF32;f__CAG-239;g__CAG-495;s__CAG-495 sp000436375	p__Proteobacteria	3.7e-06	22.3	305	1	[[1, 354]]	6.4e-06	GUT_GENOME281389	MAG	ZeeviD_2015__PNP_Validation_64__bin.11	49.17	104533	12.3063	0.0200476
GUT_GENOME282385_01001	Acetylornithine deacetylase	d__Bacteria;p__Bacteroidota;c__Bacteroidia;o__Bacteroidales;f__Rikenellaceae;g__Alistipes;s__Alistipes sp900290115	p__Bacteroidota	1.8e-12	43.4	241	1	[[12, 293]]	2.2e-12	GUT_GENOME282385	MAG	ZellerG_2014__CCIS11354283ST-4-0__bin.36	62.01	104544	2.18778	0.0450603
GUT_GENOME248856_01038	putative succinyl-diaminopimelate desuccinylase	d__Bacteria;p__Actinobacteriota;c__Coriobacteriia;o__Coriobacteriales;f__Coriobacteriaceae;g__Collinsella;s__Collinsella sp002232035	p__Actinobacteriota	7e-11	37.9	320	1	[[8, 388]]	8.4e-11	GUT_GENOME248856	MAG	WenC_2017__N286__bin.21	60.1	103906
GUT_GENOME113426_00428	Acetylornithine deacetylase	d__Bacteria;p__Bacteroidota;c__Bacteroidia;o__Bacteroidales;f__Bacteroidaceae;g__Prevotella;s__	p__Bacteroidota	1.9e-17	59.7	248	1	[[25, 310]]	2.5e-17	GUT_GENOME113426	MAG	LeChatelierE_2013__MH0427__bin.13	50.92	101882
GUT_GENOME110766_01945	Hippurate hydrolase	d__Bacteria;p__Firmicutes_A;c__Clostridia;o__Lachnospirales;f__Lachnospiraceae;g__UBA11774;s__	p__Firmicutes_A	4.9e-08	28.7	271	1	[[4, 327]]	6.7e-08	GUT_GENOME110766	MAG	LeChatelierE_2013__MH0189__bin.32	42.43	101811
GUT_GENOME111495_00727	Carboxypeptidase G2	d__Bacteria;p__Firmicutes_A;c__Clostridia;o__Oscillospirales;f__Acutalibacteraceae;g__;s__	p__Firmicutes_A	2.5e-42	141.4	396	1	[[1, 386]]	3.4e-42	GUT_GENOME111495	MAG	LeChatelierE_2013__MH0229__bin.74	50.79	101829
GUT_GENOME237865_01691	Carboxypeptidase G2	d__Bacteria;p__Proteobacteria;c__Gammaproteobacteria;o__Enterobacterales;f__Succinivibrionaceae;g__Succinivibrio;s__	p__Proteobacteria	8.8e-34	113.7	317	1	[[33, 370]]	1.2e-33	GUT_GENOME237865	MAG	SRS476348_14	62.16	103612
GUT_GENOME239428_00599	Peptidase T	d__Bacteria;p__Firmicutes_A;c__Clostridia;o__Lachnospirales;f__Lachnospiraceae;g__Fusicatenibacter;s__	p__Firmicutes_A	3.9e-09	32	280	1	[[0, 366]]	4.1e-09	GUT_GENOME239428	MAG	SRS883021_119	48.29	103676
GUT_GENOME096268_02153	Peptidase T	d__Bacteria;p__Firmicutes;c__Bacilli;o__Bacillales;f__Amphibacillaceae;g__Oceanobacillus;s__Oceanobacillus massiliensis	p__Firmicutes	7.6e-17	58.6	379	1	[[2, 375]]	8.7e-17	GUT_GENOME096268	Isolate	GCF_000285495	40.35	101403
GUT_GENOME096268_01763	Succinyl-diaminopimelate desuccinylase	d__Bacteria;p__Firmicutes;c__Bacilli;o__Bacillales;f__Amphibacillaceae;g__Oceanobacillus;s__Oceanobacillus massiliensis	p__Firmicutes	3.5e-07	26.7	263	2	[[6, 244], [306, 409]]	0.00013	GUT_GENOME096268	Isolate	GCF_000285495	40.35	101403
GUT_GENOME096442_02657	N-formyl-4-amino-5-aminomethyl-2-methylpyrimidine deformylase	d__Bacteria;p__Firmicutes_A;c__Clostridia;o__Clostridiales;f__Clostridiaceae;g__Clostridium_J;s__Clostridium_J sp000821305	p__Firmicutes_A	4.9e-08	29.7	303	1	[[2, 333]]	8e-08	GUT_GENOME096442	Isolate	GCF_000751675	32.22	101474
GUT_GENOME096442_03181	putative hydrolase YxeP	d__Bacteria;p__Firmicutes_A;c__Clostridia;o__Clostridiales;f__Clostridiaceae;g__Clostridium_J;s__Clostridium_J sp000821305	p__Firmicutes_A	4.7e-07	26.5	267	1	[[34, 343]]	7e-07	GUT_GENOME096442	Isolate	GCF_000751675	32.22	101474
GUT_GENOME096442_02897	Hippurate hydrolase	d__Bacteria;p__Firmicutes_A;c__Clostridia;o__Clostridiales;f__Clostridiaceae;g__Clostridium_J;s__Clostridium_J sp000821305	p__Firmicutes_A	8.3e-07	25.7	231	1	[[26, 334]]	1.6e-06	GUT_GENOME096442	Isolate	GCF_000751675	32.22	101474
GUT_GENOME096442_02580	putative hydrolase YxeP	d__Bacteria;p__Firmicutes_A;c__Clostridia;o__Clostridiales;f__Clostridiaceae;g__Clostridium_J;s__Clostridium_J sp000821305	p__Firmicutes_A	5.9e-06	22.9	279	1	[[29, 333]]	8.8e-06	GUT_GENOME096442	Isolate	GCF_000751675	32.22	101474
GUT_GENOME096385_01836	Putative succinyl-diaminopimelate desuccinylase DapE	d__Bacteria;p__Actinobacteriota;c__Actinobacteria;o__Propionibacteriales;f__Propionibacteriaceae;g__Cutibacterium;s__Cutibacterium avidum	p__Actinobacteriota	2.5e-11	39.9	237	1	[[13, 282]]	3.7e-11	GUT_GENOME096385	Isolate	GCF_000413335	63.4	101446
GUT_GENOME148816_01971	N-acetyl-lysine deacetylase	d__Bacteria;p__Firmicutes_C;c__Negativicutes;o__Veillonellales;f__Megasphaeraceae;g__Megasphaera;s__	p__Firmicutes_C	8.4e-10	34.5	257	1	[[33, 309]]	1.1e-09	GUT_GENOME148816	MAG	QinJ_2012__CON-061__bin.1	53.69	102555
GUT_GENOME145695_04192	Acetylornithine deacetylase	d__Bacteria;p__Proteobacteria;c__Gammaproteobacteria;o__Enterobacterales;f__Enterobacteriaceae;g__Klebsiella;s__Klebsiella quasipneumoniae	p__Proteobacteria	1.3e-15	54.9	236	1	[[0, 281]]	1.6e-15	GUT_GENOME145695	Isolate	PATRIC_573_15563	58.32	102510	0.0911577	0.0153801
GUT_GENOME145695_01069	Acetylornithine deacetylase	d__Bacteria;p__Proteobacteria;c__Gammaproteobacteria;o__Enterobacterales;f__Enterobacteriaceae;g__Klebsiella;s__Klebsiella quasipneumoniae	p__Proteobacteria	2.1e-09	34.5	236	1	[[36, 288]]	3.4e-09	GUT_GENOME145695	Isolate	PATRIC_573_15563	58.32	102510	0.0911577	0.0153801
GUT_GENOME145695_02695	Acetylornithine deacetylase	d__Bacteria;p__Proteobacteria;c__Gammaproteobacteria;o__Enterobacterales;f__Enterobacteriaceae;g__Klebsiella;s__Klebsiella quasipneumoniae	p__Proteobacteria	3.9e-07	27	261	1	[[38, 324]]	6.4e-07	GUT_GENOME145695	Isolate	PATRIC_573_15563	58.32	102510	0.0911577	0.0153801
GUT_GENOME239761_00602	putative succinyl-diaminopimelate desuccinylase	d__Bacteria;p__Actinobacteriota;c__Coriobacteriia;o__Coriobacteriales;f__Coriobacteriaceae;g__Collinsella;s__	p__Actinobacteriota	6.5e-10	34.8	317	1	[[8, 384]]	7.6e-10	GUT_GENOME239761	Isolate	TM04-29	59.65	103698
GUT_GENOME239721_00333	putative succinyl-diaminopimelate desuccinylase	d__Bacteria;p__Actinobacteriota;c__Coriobacteriia;o__Coriobacteriales;f__Coriobacteriaceae;g__Collinsella;s__Collinsella sp002232035	p__Actinobacteriota	7.9e-10	34.6	266	1	[[9, 384]]	9.5e-10	GUT_GENOME239721	Isolate	TF10-11AT	59.65	103692
GUT_GENOME011495_00097	Acetylornithine deacetylase	d__Bacteria;p__Firmicutes_A;c__Clostridia;o__4C28d-15;f__;g__;s__	p__Firmicutes_A	2.1e-16	55.2	229	1	[[55, 298]]	2.8e-16	GUT_GENOME011495	MAG	BritoIL_2016__M1.29.ST__bin.26	33.65	100472
GUT_GENOME090402_01018	Acetylornithine deacetylase	d__Bacteria;p__Actinobacteriota;c__Coriobacteriia;o__Coriobacteriales;f__Coriobacteriaceae;g__Collinsella;s__Collinsella sp002391315	p__Actinobacteriota	2.4e-12	42.7	278	1	[[8, 393]]	2.8e-12	GUT_GENOME090402	MAG	ERS608609_7	59.69	101176	0.0911577	0.00747582
GUT_GENOME083453_01812	Peptidase T	d__Bacteria;p__Firmicutes_A;c__Clostridia;o__Oscillospirales;f__Butyricicoccaceae;g__Butyricicoccus_A;s__Butyricicoccus_A sp002395695	p__Firmicutes_A	5.7e-13	45	275	1	[[1, 296]]	7.2e-13	GUT_GENOME083453	MAG	ERS537286_32	51.73	101120	2.55242	0.00787821
GUT_GENOME088921_00552	putative succinyl-diaminopimelate desuccinylase	d__Bacteria;p__Actinobacteriota;c__Coriobacteriia;o__Coriobacteriales;f__Coriobacteriaceae;g__Collinsella;s__Collinsella sp000763055	p__Actinobacteriota	1.5e-09	33.4	265	1	[[9, 369]]	1.9e-09	GUT_GENOME088921	MAG	ERS608556_39	60.01	101165
GUT_GENOME132185_00205	N-formyl-4-amino-5-aminomethyl-2-methylpyrimidine deformylase	d__Bacteria;p__Firmicutes_A;c__Clostridia;o__Oscillospirales;f__Acutalibacteraceae;g__;s__	p__Firmicutes_A	4.2e-15	52.2	246	1	[[1, 254]]	6.1e-15	GUT_GENOME132185	MAG	LouisS_2016__AS68_3__bin.17	50.59	102159
GUT_GENOME008832_00757	Acetylornithine deacetylase	d__Bacteria;p__Actinobacteriota;c__Coriobacteriia;o__Coriobacteriales;f__Coriobacteriaceae;g__Collinsella;s__	p__Actinobacteriota	2.3e-11	39.5	302	1	[[9, 388]]	2.9e-11	GUT_GENOME008832	MAG	Bengtsson-PalmeJ_2015__TRAVELRES33__bin.31	60.07	100396
GUT_GENOME096372_03756	Carboxypeptidase G2	d__Bacteria;p__Firmicutes_I;c__Bacilli_A;o__Paenibacillales;f__Paenibacillaceae;g__Paenibacillus_F;s__Paenibacillus_F sp000411255	p__Firmicutes_I	3.9e-55	185.5	389	1	[[0, 384]]	4.7e-55	GUT_GENOME096372	Isolate	GCF_000411255	52.92	101436
GUT_GENOME096372_04470	Peptidase T	d__Bacteria;p__Firmicutes_I;c__Bacilli_A;o__Paenibacillales;f__Paenibacillaceae;g__Paenibacillus_F;s__Paenibacillus_F sp000411255	p__Firmicutes_I	5.7e-13	46.5	280	1	[[1, 362]]	6.8e-13	GUT_GENOME096372	Isolate	GCF_000411255	52.92	101436
GUT_GENOME086504_00813	Peptidase T	d__Bacteria;p__Fusobacteriota;c__Fusobacteriia;o__Fusobacteriales;f__Fusobacteriaceae;g__Fusobacterium_B;s__	p__Fusobacteriota	4.6e-13	44.6	371	1	[[1, 369]]	6.1e-13	GUT_GENOME086504	MAG	ERS537392_50	29.64	101149
GUT_GENOME084630_01298	putative succinyl-diaminopimelate desuccinylase	d__Bacteria;p__Actinobacteriota;c__Coriobacteriia;o__Coriobacteriales;f__Coriobacteriaceae;g__Collinsella;s__	p__Actinobacteriota	3.5e-11	38.9	273	1	[[10, 392]]	4.2e-11	GUT_GENOME084630	MAG	ERS537327_7	59.71	101134
GUT_GENOME085404_01367	Carboxypeptidase G2	d__Bacteria;p__Synergistota;c__Synergistia;o__Synergistales;f__Dethiosulfovibrionaceae;g__Pyramidobacter;s__	p__Synergistota	5e-40	133.9	381	1	[[5, 380]]	6.1e-40	GUT_GENOME085404	MAG	ERS537353_54	59.94	101143
GUT_GENOME085076_00725	putative succinyl-diaminopimelate desuccinylase	d__Bacteria;p__Actinobacteriota;c__Coriobacteriia;o__Coriobacteriales;f__Coriobacteriaceae;g__Collinsella;s__	p__Actinobacteriota	1.8e-10	36.4	323	1	[[8, 383]]	2.4e-10	GUT_GENOME085076	MAG	ERS537342_47	59.84	101139
GUT_GENOME257704_02754	Acetylornithine deacetylase	d__Bacteria;p__Proteobacteria;c__Gammaproteobacteria;o__Pseudomonadales;f__Pseudomonadaceae;g__Pseudomonas;s__Pseudomonas citronellolis	p__Proteobacteria	1.7e-10	38.4	249	1	[[43, 335]]	3e-10	GUT_GENOME257704	MAG	XieH_2016__YSZC12003_37197R1__bin.69	67.25	104151
GUT_GENOME257574_00255	Acetylornithine deacetylase	d__Bacteria;p__Actinobacteriota;c__Coriobacteriia;o__Coriobacteriales;f__Coriobacteriaceae;g__Collinsella;s__Collinsella aerofaciens_F	p__Actinobacteriota	8.8e-12	40.8	320	1	[[8, 389]]	1.1e-11	GUT_GENOME257574	MAG	XieH_2016__YSZC12003_37194__bin.47	60.06	104148
GUT_GENOME257270_00396	Carboxypeptidase G2	d__Bacteria;p__Firmicutes_A;c__Clostridia;o__Oscillospirales;f__Butyricicoccaceae;g__Agathobaculum;s__	p__Firmicutes_A	6.1e-38	126.9	388	1	[[2, 392]]	8.2e-38	GUT_GENOME257270	MAG	XieH_2016__YSZC12003_37179__bin.21	58.9	104135
GUT_GENOME196449_01399	putative succinyl-diaminopimelate desuccinylase	d__Bacteria;p__Actinobacteriota;c__Coriobacteriia;o__Coriobacteriales;f__Coriobacteriaceae;g__Collinsella;s__	p__Actinobacteriota	1.7e-12	43.2	332	1	[[8, 393]]	2.1e-12	GUT_GENOME196449	MAG	SRR5127493_bin.9	60.1	103033
GUT_GENOME196669_01513	putative succinyl-diaminopimelate desuccinylase	d__Bacteria;p__Actinobacteriota;c__Coriobacteriia;o__Coriobacteriales;f__Coriobacteriaceae;g__Collinsella;s__Collinsella aerofaciens_F	p__Actinobacteriota	6.2e-09	31.3	253	1	[[20, 386]]	7.3e-09	GUT_GENOME196669	MAG	SRR5127533_bin.13	60.04	103039
GUT_GENOME195439_00147	putative succinyl-diaminopimelate desuccinylase	d__Bacteria;p__Actinobacteriota;c__Coriobacteriia;o__Coriobacteriales;f__Coriobacteriaceae;g__Collinsella;s__	p__Actinobacteriota	1.3e-11	39.8	320	1	[[8, 388]]	1.6e-11	GUT_GENOME195439	MAG	SRR5106325_bin.8	60.81	103020
GUT_GENOME164707_00267	Carboxypeptidase G2	d__Bacteria;p__Firmicutes_C;c__Negativicutes;o__Veillonellales;f__Dialisteraceae;g__Dialister;s__	p__Firmicutes_C	1.6e-27	92.4	275	1	[[1, 289]]	2.1e-27	GUT_GENOME164707	MAG	SRR1196593_bin.8	42.94	102777
GUT_GENOME159364_00640	putative hydrolase YxeP	d__Bacteria;p__Firmicutes_A;c__Clostridia;o__;f__;g__;s__	p__Firmicutes_A	1e-05	21.5	259	1	[[28, 346]]	1.3e-05	GUT_GENOME159364	MAG	RaymondF_2016__P6C0__bin.16	50.42	102719
GUT_GENOME162823_00007	Acetylornithine deacetylase	d__Bacteria;p__Actinobacteriota;c__Coriobacteriia;o__Coriobacteriales;f__Coriobacteriaceae;g__Collinsella;s__Collinsella aerofaciens_F	p__Actinobacteriota	7.1e-13	44.5	324	1	[[8, 393]]	8.9e-13	GUT_GENOME162823	MAG	SchirmerM_2016__G89067__bin.5	60.12	102754
GUT_GENOME166524_00015	putative succinyl-diaminopimelate desuccinylase	d__Bacteria;p__Actinobacteriota;c__Coriobacteriia;o__Coriobacteriales;f__Atopobiaceae;g__Olsenella_E;s__	p__Actinobacteriota	2.6e-11	39.4	256	1	[[12, 354]]	3.2e-11	GUT_GENOME166524	MAG	SRR1197768_bin.9	64.13	102782
GUT_GENOME166524_00113	N-acetyl-lysine deacetylase	d__Bacteria;p__Actinobacteriota;c__Coriobacteriia;o__Coriobacteriales;f__Atopobiaceae;g__Olsenella_E;s__	p__Actinobacteriota	7.8e-09	31.2	313	1	[[47, 384]]	1.1e-08	GUT_GENOME166524	MAG	SRR1197768_bin.9	64.13	102782
GUT_GENOME166524_01551	putative hydrolase YxeP	d__Bacteria;p__Actinobacteriota;c__Coriobacteriia;o__Coriobacteriales;f__Atopobiaceae;g__Olsenella_E;s__	p__Actinobacteriota	3.2e-07	25.9	234	1	[[31, 308]]	5e-07	GUT_GENOME166524	MAG	SRR1197768_bin.9	64.13	102782
GUT_GENOME158963_01269	putative hydrolase YxeP	d__Bacteria;p__Firmicutes_A;c__Clostridia;o__Oscillospirales;f__Acutalibacteraceae;g__;s__	p__Firmicutes_A	5.3e-07	25.9	255	1	[[34, 313]]	7.4e-07	GUT_GENOME158963	MAG	RaymondF_2016__P25C90__bin.36	58.88	102711	0.364631	0.0053967
GUT_GENOME164136_00514	putative succinyl-diaminopimelate desuccinylase	d__Bacteria;p__Actinobacteriota;c__Coriobacteriia;o__Coriobacteriales;f__Coriobacteriaceae;g__Collinsella;s__	p__Actinobacteriota	1.9e-11	39.7	310	1	[[9, 392]]	2.4e-11	GUT_GENOME164136	MAG	SchirmerM_2016__G89273__bin.22	59.94	102766
GUT_GENOME161997_01477	putative succinyl-diaminopimelate desuccinylase	d__Bacteria;p__Actinobacteriota;c__Coriobacteriia;o__Coriobacteriales;f__Coriobacteriaceae;g__Collinsella;s__	p__Actinobacteriota	8.8e-11	37.5	266	1	[[10, 386]]	1e-10	GUT_GENOME161997	MAG	SchirmerM_2016__G88985__bin.24	60.01	102747
GUT_GENOME160374_00938	putative succinyl-diaminopimelate desuccinylase	d__Bacteria;p__Actinobacteriota;c__Coriobacteriia;o__Coriobacteriales;f__Coriobacteriaceae;g__Collinsella;s__	p__Actinobacteriota	1.8e-10	36.4	251	1	[[15, 340]]	2.2e-10	GUT_GENOME160374	MAG	SchirmerM_2016__G88790__bin.10	59.99	102730
GUT_GENOME096269_02800	Peptidase T	d__Bacteria;p__Firmicutes_I;c__Bacilli_A;o__Paenibacillales;f__Paenibacillaceae;g__Paenibacillus_L;s__Paenibacillus_L senegalensis	p__Firmicutes_I	2.3e-15	54.1	340	1	[[1, 379]]	2.8e-15	GUT_GENOME096269	Isolate	GCF_000285515	48.21	101404
GUT_GENOME096269_01722	Acetylornithine deacetylase	d__Bacteria;p__Firmicutes_I;c__Bacilli_A;o__Paenibacillales;f__Paenibacillaceae;g__Paenibacillus_L;s__Paenibacillus_L senegalensis	p__Firmicutes_I	5.8e-06	23.2	294	1	[[5, 299]]	9.1e-06	GUT_GENOME096269	Isolate	GCF_000285515	48.21	101404
GUT_GENOME096458_02471	putative succinyl-diaminopimelate desuccinylase	d__Bacteria;p__Firmicutes_A;c__Clostridia;o__Clostridiales;f__Clostridiaceae;g__Clostridium_AA;s__Clostridium_AA polynesiense	p__Firmicutes_A	4.4e-14	49.4	235	1	[[40, 309]]	5.7e-14	GUT_GENOME096458	Isolate	GCF_000820705	34	101479
GUT_GENOME096407_01892	Carboxypeptidase G2	d__Bacteria;p__Fusobacteriota;c__Fusobacteriia;o__Fusobacteriales;f__Fusobacteriaceae;g__Cetobacterium_A;s__Cetobacterium_A somerae	p__Fusobacteriota	5.6e-28	94.9	386	1	[[6, 392]]	7.6e-28	GUT_GENOME096407	Isolate	GCF_000479045	28.58	101458
GUT_GENOME096407_00540	Peptidase T	d__Bacteria;p__Fusobacteriota;c__Fusobacteriia;o__Fusobacteriales;f__Fusobacteriaceae;g__Cetobacterium_A;s__Cetobacterium_A somerae	p__Fusobacteriota	7.2e-21	71.5	364	1	[[2, 366]]	8.2e-21	GUT_GENOME096407	Isolate	GCF_000479045	28.58	101458
GUT_GENOME096467_01681	Carboxypeptidase G2	d__Bacteria;p__Actinobacteriota;c__Actinobacteria;o__Propionibacteriales;f__Propionibacteriaceae;g__Nigerium;s__Nigerium massiliense	p__Actinobacteriota	7.6e-40	134	371	1	[[1, 378]]	9.6e-40	GUT_GENOME096467	Isolate	GCF_000826085	70.39	101484
GUT_GENOME096467_02356	Putative succinyl-diaminopimelate desuccinylase DapE	d__Bacteria;p__Actinobacteriota;c__Actinobacteria;o__Propionibacteriales;f__Propionibacteriaceae;g__Nigerium;s__Nigerium massiliense	p__Actinobacteriota	3.3e-07	26.4	259	1	[[18, 304]]	5.4e-07	GUT_GENOME096467	Isolate	GCF_000826085	70.39	101484
GUT_GENOME253217_00745	Carboxypeptidase G2	d__Bacteria;p__Proteobacteria;c__Gammaproteobacteria;o__Burkholderiales;f__Burkholderiaceae;g__CAG-521;s__	p__Proteobacteria	1.9e-52	174.6	380	1	[[1, 373]]	2.6e-52	GUT_GENOME253217	MAG	XieH_2016__YSZC12003_35742__bin.54	49.59	103999
GUT_GENOME253217_00472	N-acetyl-lysine deacetylase	d__Bacteria;p__Proteobacteria;c__Gammaproteobacteria;o__Burkholderiales;f__Burkholderiaceae;g__CAG-521;s__	p__Proteobacteria	5.5e-08	28.1	237	2	[[8, 73], [56, 303]]	7.4e-08	GUT_GENOME253217	MAG	XieH_2016__YSZC12003_35742__bin.54	49.59	103999
GUT_GENOME253217_00085	Peptidase T	d__Bacteria;p__Proteobacteria;c__Gammaproteobacteria;o__Burkholderiales;f__Burkholderiaceae;g__CAG-521;s__	p__Proteobacteria	2.9e-06	22.4	264	2	[[33, 84], [148, 401]]	1.2e-05	GUT_GENOME253217	MAG	XieH_2016__YSZC12003_35742__bin.54	49.59	103999
GUT_GENOME248004_01006	putative succinyl-diaminopimelate desuccinylase	d__Bacteria;p__Actinobacteriota;c__Coriobacteriia;o__Coriobacteriales;f__Coriobacteriaceae;g__Collinsella;s__	p__Actinobacteriota	1.1e-10	37.2	298	1	[[9, 388]]	1.3e-10	GUT_GENOME248004	MAG	WenC_2017__N029__bin.23	60.46	103900
GUT_GENOME018684_01050	N-acetyl-lysine deacetylase	d__Bacteria;p__Firmicutes_C;c__Negativicutes;o__Veillonellales;f__Megasphaeraceae;g__Megasphaera;s__	p__Firmicutes_C	1.3e-08	30.4	255	1	[[33, 326]]	1.8e-08	GUT_GENOME018684	MAG	CM_madagascar__A83_02_1FE__bin.29	54.88	100612
GUT_GENOME019292_00071	Succinyl-diaminopimelate desuccinylase	d__Bacteria;p__Spirochaetota;c__Spirochaetia;o__Treponematales;f__Treponemataceae;g__Treponema_D;s__	p__Spirochaetota	6.3e-16	54.6	270	1	[[15, 323]]	8.9e-16	GUT_GENOME019292	MAG	CM_madagascar__V50_01_2FE__bin.22	41.9	100639
GUT_GENOME018428_00169	Carboxypeptidase G2	d__Bacteria;p__Firmicutes_A;c__Clostridia;o__Peptostreptococcales;f__Anaerovoracaceae;g__Mogibacterium;s__Mogibacterium timonense	p__Firmicutes_A	6.4e-44	146.4	382	1	[[10, 395]]	8e-44	GUT_GENOME018428	MAG	CM_madagascar__A66_02_1FE__bin.25	53.75	100601
GUT_GENOME018428_00827	putative succinyl-diaminopimelate desuccinylase	d__Bacteria;p__Firmicutes_A;c__Clostridia;o__Peptostreptococcales;f__Anaerovoracaceae;g__Mogibacterium;s__Mogibacterium timonense	p__Firmicutes_A	1.9e-12	42.6	230	1	[[50, 377]]	2.3e-12	GUT_GENOME018428	MAG	CM_madagascar__A66_02_1FE__bin.25	53.75	100601
GUT_GENOME143407_03961	Carboxypeptidase G2	d__Bacteria;p__Proteobacteria;c__Gammaproteobacteria;o__Enterobacterales;f__Enterobacteriaceae;g__Yersinia;s__Yersinia massiliensis	p__Proteobacteria	7.5e-57	190.7	381	1	[[1, 370]]	9e-57	GUT_GENOME143407	Isolate	PATRIC_29484_22	47.52	102465
GUT_GENOME143282_00932	Carboxypeptidase G2	d__Bacteria;p__Firmicutes;c__Bacilli;o__Bacillales_A;f__Planococcaceae;g__Kurthia;s__Kurthia sp002418445	p__Firmicutes	3.9e-46	155.3	312	1	[[42, 373]]	4.6e-46	GUT_GENOME143282	Isolate	IMG_2548876794	38.83	102457
GUT_GENOME143282_01217	Peptidase T	d__Bacteria;p__Firmicutes;c__Bacilli;o__Bacillales_A;f__Planococcaceae;g__Kurthia;s__Kurthia sp002418445	p__Firmicutes	2.8e-17	60.2	268	1	[[2, 325]]	3.4e-17	GUT_GENOME143282	Isolate	IMG_2548876794	38.83	102457
GUT_GENOME143282_03583	putative hydrolase YxeP	d__Bacteria;p__Firmicutes;c__Bacilli;o__Bacillales_A;f__Planococcaceae;g__Kurthia;s__Kurthia sp002418445	p__Firmicutes	3.5e-06	23.6	251	1	[[85, 378]]	5.6e-06	GUT_GENOME143282	Isolate	IMG_2548876794	38.83	102457
GUT_GENOME142687_01328	Peptidase T	d__Bacteria;p__Firmicutes_A;c__Clostridia;o__Oscillospirales;f__Acutalibacteraceae;g__Clostridium_E;s__Clostridium_E merdae	p__Firmicutes_A	3.5e-20	69.1	264	1	[[1, 280]]	4.8e-20	GUT_GENOME142687	Isolate	PATRIC_1958780_3	45.34	102420
GUT_GENOME142585_02174	putative succinyl-diaminopimelate desuccinylase	d__Bacteria;p__Actinobacteriota;c__Actinobacteria;o__Propionibacteriales;f__Propionibacteriaceae;g__Propionibacterium;s__Propionibacterium freudenreichii	p__Actinobacteriota	6e-20	68.2	301	1	[[3, 338]]	7.7e-20	GUT_GENOME142585	Isolate	PATRIC_1744_58	67.27	102401
GUT_GENOME142585_01525	Putative succinyl-diaminopimelate desuccinylase DapE	d__Bacteria;p__Actinobacteriota;c__Actinobacteria;o__Propionibacteriales;f__Propionibacteriaceae;g__Propionibacterium;s__Propionibacterium freudenreichii	p__Actinobacteriota	1.7e-10	37	228	1	[[13, 307]]	2.2e-10	GUT_GENOME142585	Isolate	PATRIC_1744_58	67.27	102401
GUT_GENOME143740_04412	Carboxypeptidase G2	d__Bacteria;p__Proteobacteria;c__Gammaproteobacteria;o__Enterobacterales;f__Enterobacteriaceae;g__Enterobacter;s__Enterobacter cloacae_B	p__Proteobacteria	5.2e-53	178.1	379	1	[[1, 370]]	6.4e-53	GUT_GENOME143740	Isolate	PATRIC_550_1224	55.23	102498
GUT_GENOME258198_00041	putative succinyl-diaminopimelate desuccinylase	d__Bacteria;p__Actinobacteriota;c__Coriobacteriia;o__Coriobacteriales;f__Coriobacteriaceae;g__Collinsella;s__	p__Actinobacteriota	8.9e-12	40.9	319	1	[[8, 383]]	1.1e-11	GUT_GENOME258198	MAG	XieH_2016__YSZC12003_37222__bin.25	60.14	104161
GUT_GENOME257725_01688	hypothetical protein	d__Bacteria;p__Firmicutes_A;c__Clostridia;o__Christensenellales;f__UBA1750;g__UBA7102;s__	p__Firmicutes_A	1.2e-13	47.6	316	1	[[39, 366]]	1.5e-13	GUT_GENOME257725	MAG	XieH_2016__YSZC12003_37198R1__bin.1	65.45	104153	0.364631	0.00556751
GUT_GENOME239699_00538	putative succinyl-diaminopimelate desuccinylase	d__Bacteria;p__Actinobacteriota;c__Coriobacteriia;o__Coriobacteriales;f__Coriobacteriaceae;g__Collinsella;s__	p__Actinobacteriota	1.7e-11	40	307	1	[[9, 382]]	2.1e-11	GUT_GENOME239699	Isolate	TF08-11AT	59.54	103688
GUT_GENOME196479_01408	putative succinyl-diaminopimelate desuccinylase	d__Bacteria;p__Actinobacteriota;c__Coriobacteriia;o__Coriobacteriales;f__Coriobacteriaceae;g__Collinsella;s__	p__Actinobacteriota	9.9e-10	34	303	1	[[9, 383]]	1.2e-09	GUT_GENOME196479	MAG	SRR5127498_bin.5	60.29	103034
GUT_GENOME196923_01268	Acetylornithine deacetylase	d__Bacteria;p__Actinobacteriota;c__Coriobacteriia;o__Coriobacteriales;f__Coriobacteriaceae;g__Collinsella;s__	p__Actinobacteriota	7.2e-13	44.4	302	1	[[10, 389]]	8.8e-13	GUT_GENOME196923	MAG	SRR5127593_bin.10	60.12	103043
GUT_GENOME197527_01221	N-acetyl-lysine deacetylase	d__Bacteria;p__Firmicutes_A;c__Clostridia;o__Oscillospirales;f__Acutalibacteraceae;g__UBA1417;s__	p__Firmicutes_A	1.3e-11	40.3	313	1	[[56, 376]]	1.7e-11	GUT_GENOME197527	MAG	SRR5127708_bin.5	61.33	103049	0.182315	0.00434028
GUT_GENOME113664_00844	Carboxypeptidase G2	d__Bacteria;p__Firmicutes_A;c__Clostridia;o__Peptostreptococcales;f__Anaerovoracaceae;g__CAG-145;s__	p__Firmicutes_A	1.2e-45	152.7	369	1	[[1, 379]]	1.6e-45	GUT_GENOME113664	MAG	LeChatelierE_2013__MH0433__bin.54	47.63	101893
GUT_GENOME113664_00841	Carboxypeptidase G2	d__Bacteria;p__Firmicutes_A;c__Clostridia;o__Peptostreptococcales;f__Anaerovoracaceae;g__CAG-145;s__	p__Firmicutes_A	3.8e-35	118.1	386	1	[[3, 388]]	5e-35	GUT_GENOME113664	MAG	LeChatelierE_2013__MH0433__bin.54	47.63	101893
GUT_GENOME113664_00296	p-aminobenzoyl-glutamate hydrolase subunit B	d__Bacteria;p__Firmicutes_A;c__Clostridia;o__Peptostreptococcales;f__Anaerovoracaceae;g__CAG-145;s__	p__Firmicutes_A	1e-09	34.2	230	1	[[98, 351]]	1.4e-09	GUT_GENOME113664	MAG	LeChatelierE_2013__MH0433__bin.54	47.63	101893
GUT_GENOME113664_00741	Acetylornithine deacetylase	d__Bacteria;p__Firmicutes_A;c__Clostridia;o__Peptostreptococcales;f__Anaerovoracaceae;g__CAG-145;s__	p__Firmicutes_A	6.6e-09	31.6	229	1	[[47, 388]]	8.1e-09	GUT_GENOME113664	MAG	LeChatelierE_2013__MH0433__bin.54	47.63	101893
GUT_GENOME111598_02328	Carboxypeptidase G2	d__Bacteria;p__Desulfobacterota_A;c__Desulfovibrionia;o__Desulfovibrionales;f__Desulfovibrionaceae;g__Bilophila;s__	p__Desulfobacterota_A	2.7e-36	122.3	298	1	[[12, 325]]	3.5e-36	GUT_GENOME111598	MAG	LeChatelierE_2013__MH0239__bin.24	62.4	101832
GUT_GENOME111598_01929	Carboxypeptidase G2	d__Bacteria;p__Desulfobacterota_A;c__Desulfovibrionia;o__Desulfovibrionales;f__Desulfovibrionaceae;g__Bilophila;s__	p__Desulfobacterota_A	8.1e-30	100.9	271	1	[[0, 279]]	9.6e-30	GUT_GENOME111598	MAG	LeChatelierE_2013__MH0239__bin.24	62.4	101832
GUT_GENOME001769_01128	putative succinyl-diaminopimelate desuccinylase	d__Bacteria;p__Actinobacteriota;c__Coriobacteriia;o__Coriobacteriales;f__Coriobacteriaceae;g__Collinsella;s__	p__Actinobacteriota	3.8e-11	38.9	303	1	[[9, 392]]	4.9e-11	GUT_GENOME001769	Isolate	AM42-18AC	59.72	100270
GUT_GENOME001223_00068	putative succinyl-diaminopimelate desuccinylase	d__Bacteria;p__Actinobacteriota;c__Coriobacteriia;o__Coriobacteriales;f__Coriobacteriaceae;g__Collinsella;s__Collinsella sp002232035	p__Actinobacteriota	1.6e-11	40.1	332	1	[[8, 393]]	2e-11	GUT_GENOME001223	Isolate	AF36-3AT	59.82	100207
GUT_GENOME003284_00389	Carboxypeptidase G2	d__Bacteria;p__Firmicutes_C;c__Negativicutes;o__Acidaminococcales;f__Acidaminococcaceae;g__Phascolarctobacterium_A;s__	p__Firmicutes_C	6.3e-45	150	369	2	[[3, 251], [252, 406]]	2.1e-37	GUT_GENOME003284	MAG	BackhedF_2015__SID241_12M__bin.12	39.63	100294	0.729262	0.0182397
GUT_GENOME003284_01514	Peptidase T	d__Bacteria;p__Firmicutes_C;c__Negativicutes;o__Acidaminococcales;f__Acidaminococcaceae;g__Phascolarctobacterium_A;s__	p__Firmicutes_C	1.3e-27	92.9	292	1	[[2, 321]]	1.6e-27	GUT_GENOME003284	MAG	BackhedF_2015__SID241_12M__bin.12	39.63	100294	0.729262	0.0182397
GUT_GENOME001471_01132	Acetylornithine deacetylase	d__Bacteria;p__Firmicutes_A;c__Clostridia;o__Lachnospirales;f__Lachnospiraceae;g__Clostridium_M;s__Clostridium_M sp000431375	p__Firmicutes_A	1.4e-11	41.1	339	1	[[0, 362]]	1.7e-11	GUT_GENOME001471	Isolate	AM22-11AC	44.08	100242	8.56882	0.00946918
GUT_GENOME001573_02182	putative succinyl-diaminopimelate desuccinylase	d__Bacteria;p__Firmicutes;c__Bacilli;o__Lactobacillales;f__Lactobacillaceae;g__Weissella;s__Weissella cibaria	p__Firmicutes	1.1e-08	31.1	231	2	[[2, 175], [177, 349]]	5e-06	GUT_GENOME001573	Isolate	AM27-22LB	44.77	100248
GUT_GENOME282720_00229	putative succinyl-diaminopimelate desuccinylase	d__Bacteria;p__Actinobacteriota;c__Coriobacteriia;o__Coriobacteriales;f__Coriobacteriaceae;g__Collinsella;s__Collinsella aerofaciens_F	p__Actinobacteriota	3.4e-11	38.9	307	1	[[9, 386]]	4.3e-11	GUT_GENOME282720	MAG	ZellerG_2014__CCIS20795251ST-4-0__bin.41	60.15	104550
GUT_GENOME250934_01849	Acetylornithine deacetylase	d__Bacteria;p__Actinobacteriota;c__Coriobacteriia;o__Coriobacteriales;f__Coriobacteriaceae;g__Collinsella;s__	p__Actinobacteriota	7.1e-12	41.3	320	1	[[8, 386]]	8.7e-12	GUT_GENOME250934	MAG	XieH_2016__YSZC12003_35366__bin.3	60.19	103928
GUT_GENOME248577_01365	Carboxypeptidase G2	d__Bacteria;p__Firmicutes_A;c__Clostridia;o__Oscillospirales;f__Oscillospiraceae;g__Lawsonibacter;s__	p__Firmicutes_A	3.8e-42	141.1	391	1	[[0, 384]]	5.5e-42	GUT_GENOME248577	MAG	WenC_2017__N253__bin.156	61.96	103903	0.273473	0.00362741
GUT_GENOME165031_00348	putative succinyl-diaminopimelate desuccinylase	d__Bacteria;p__Actinobacteriota;c__Coriobacteriia;o__Coriobacteriales;f__Coriobacteriaceae;g__Collinsella;s__	p__Actinobacteriota	2.4e-12	42.7	265	1	[[10, 395]]	2.7e-12	GUT_GENOME165031	MAG	SRR1197013_bin.19	59.83	102778
GUT_GENOME161306_00324	Acetylornithine deacetylase	d__Bacteria;p__Bacteroidota;c__Bacteroidia;o__Bacteroidales;f__Bacteroidaceae;g__Prevotella;s__	p__Bacteroidota	2.4e-16	56	255	2	[[26, 277], [318, 354]]	5.3e-16	GUT_GENOME161306	MAG	SchirmerM_2016__G88900__bin.24	48.77	102737	0.182315	0.0116776
GUT_GENOME088395_01580	Carboxypeptidase G2	d__Bacteria;p__Firmicutes_C;c__Negativicutes;o__Veillonellales;f__Dialisteraceae;g__UBA1822;s__	p__Firmicutes_C	2.4e-21	72.2	263	1	[[2, 275]]	3.2e-21	GUT_GENOME088395	MAG	ERS608535_54	57.23	101162	0.273473	0.0177554
GUT_GENOME088395_00731	Peptidase T	d__Bacteria;p__Firmicutes_C;c__Negativicutes;o__Veillonellales;f__Dialisteraceae;g__UBA1822;s__	p__Firmicutes_C	5.9e-18	61	283	1	[[0, 338]]	6.9e-18	GUT_GENOME088395	MAG	ERS608535_54	57.23	101162	0.273473	0.0177554
GUT_GENOME082932_02019	Carboxypeptidase G2	d__Bacteria;p__Firmicutes_A;c__Clostridia;o__Oscillospirales;f__Butyricicoccaceae;g__Agathobaculum;s__	p__Firmicutes_A	1.2e-45	152.7	397	1	[[1, 392]]	1.5e-45	GUT_GENOME082932	MAG	ERS537268_46	58.15	101115	0.364631	0.00634465
GUT_GENOME082932_01942	putative hydrolase YxeP	d__Bacteria;p__Firmicutes_A;c__Clostridia;o__Oscillospirales;f__Butyricicoccaceae;g__Agathobaculum;s__	p__Firmicutes_A	1.5e-07	27.1	270	1	[[7, 330]]	2.2e-07	GUT_GENOME082932	MAG	ERS537268_46	58.15	101115	0.364631	0.00634465
GUT_GENOME084234_00238	putative succinyl-diaminopimelate desuccinylase	d__Bacteria;p__Actinobacteriota;c__Coriobacteriia;o__Coriobacteriales;f__Coriobacteriaceae;g__Collinsella;s__	p__Actinobacteriota	2.5e-09	32.7	322	1	[[9, 383]]	3.3e-09	GUT_GENOME084234	MAG	ERS537313_47	60.21	101127
GUT_GENOME086641_01415	putative succinyl-diaminopimelate desuccinylase	d__Bacteria;p__Actinobacteriota;c__Coriobacteriia;o__Coriobacteriales;f__Coriobacteriaceae;g__Collinsella;s__	p__Actinobacteriota	3.6e-11	38.7	306	1	[[9, 386]]	4.5e-11	GUT_GENOME086641	MAG	ERS537397_69	60.16	101150
GUT_GENOME089515_00936	putative succinyl-diaminopimelate desuccinylase	d__Bacteria;p__Firmicutes_B;c__Peptococcia;o__Peptococcales;f__Peptococcaceae;g__;s__	p__Firmicutes_B	3.2e-06	22.8	228	1	[[41, 328]]	4.4e-06	GUT_GENOME089515	MAG	ERS608579_47	44.78	101171
GUT_GENOME199111_01318	putative succinyl-diaminopimelate desuccinylase	d__Bacteria;p__Actinobacteriota;c__Coriobacteriia;o__Coriobacteriales;f__Coriobacteriaceae;g__Collinsella;s__	p__Actinobacteriota	6.2e-12	41.5	318	1	[[8, 385]]	7.6e-12	GUT_GENOME199111	MAG	SRR5275453_bin.24	60.04	103062
GUT_GENOME134977_00616	Acetylornithine deacetylase	d__Bacteria;p__Bacteroidota;c__Bacteroidia;o__Bacteroidales;f__Bacteroidaceae;g__;s__	p__Bacteroidota	9.4e-18	60.5	233	1	[[36, 296]]	1.2e-17	GUT_GENOME134977	MAG	NielsenHB_2014__O2_UC24_2__bin.41	59.73	102178
GUT_GENOME128042_01869	Carboxypeptidase G2	d__Bacteria;p__Proteobacteria;c__Gammaproteobacteria;o__Burkholderiales;f__Burkholderiaceae;g__Sutterella;s__	p__Proteobacteria	3e-42	141.6	377	1	[[2, 371]]	4.4e-42	GUT_GENOME128042	MAG	LiuW_2016__SRR3992997__bin.26	59.71	102101	0.911577	0.010277
GUT_GENOME128042_00691	Carboxypeptidase G2	d__Bacteria;p__Proteobacteria;c__Gammaproteobacteria;o__Burkholderiales;f__Burkholderiaceae;g__Sutterella;s__	p__Proteobacteria	4e-40	134.6	374	1	[[1, 369]]	4.8e-40	GUT_GENOME128042	MAG	LiuW_2016__SRR3992997__bin.26	59.71	102101	0.911577	0.010277
GUT_GENOME128042_01576	Acetylornithine deacetylase	d__Bacteria;p__Proteobacteria;c__Gammaproteobacteria;o__Burkholderiales;f__Burkholderiaceae;g__Sutterella;s__	p__Proteobacteria	6.1e-11	38.4	280	1	[[32, 353]]	7.9e-11	GUT_GENOME128042	MAG	LiuW_2016__SRR3992997__bin.26	59.71	102101	0.911577	0.010277
GUT_GENOME128042_00827	N-acetyl-lysine deacetylase	d__Bacteria;p__Proteobacteria;c__Gammaproteobacteria;o__Burkholderiales;f__Burkholderiaceae;g__Sutterella;s__	p__Proteobacteria	4.4e-09	32.3	244	1	[[45, 407]]	5.2e-09	GUT_GENOME128042	MAG	LiuW_2016__SRR3992997__bin.26	59.71	102101	0.911577	0.010277
GUT_GENOME128042_02144	N-acyl-L-amino acid amidohydrolase	d__Bacteria;p__Proteobacteria;c__Gammaproteobacteria;o__Burkholderiales;f__Burkholderiaceae;g__Sutterella;s__	p__Proteobacteria	5.8e-07	25.3	396	2	[[28, 94], [98, 288]]	1.3e-06	GUT_GENOME128042	MAG	LiuW_2016__SRR3992997__bin.26	59.71	102101	0.911577	0.010277
GUT_GENOME284003_02124	Acetylornithine deacetylase	d__Bacteria;p__Bacteroidota;c__Bacteroidia;o__Bacteroidales;f__Bacteroidaceae;g__Prevotella;s__Prevotella sp900317685	p__Bacteroidota	3.9e-14	49.2	235	1	[[20, 294]]	5e-14	GUT_GENOME284003	MAG	ZellerG_2014__CCIS52234160ST-4-0__bin.19	51.35	104588
GUT_GENOME283627_00870	Carboxypeptidase G2	d__Bacteria;p__Firmicutes_A;c__Clostridia;o__Lachnospirales;f__Lachnospiraceae;g__CAG-81;s__	p__Firmicutes_A	1.1e-53	179.5	382	1	[[1, 376]]	1.4e-53	GUT_GENOME283627	MAG	ZellerG_2014__CCIS44743950ST-4-0__bin.43	49.47	104582
GUT_GENOME283627_01391	Carboxypeptidase G2	d__Bacteria;p__Firmicutes_A;c__Clostridia;o__Lachnospirales;f__Lachnospiraceae;g__CAG-81;s__	p__Firmicutes_A	4.3e-51	170.9	377	1	[[2, 374]]	7.3e-51	GUT_GENOME283627	MAG	ZellerG_2014__CCIS44743950ST-4-0__bin.43	49.47	104582
GUT_GENOME283627_01389	Carboxypeptidase G2	d__Bacteria;p__Firmicutes_A;c__Clostridia;o__Lachnospirales;f__Lachnospiraceae;g__CAG-81;s__	p__Firmicutes_A	2.1e-46	155.5	391	1	[[4, 388]]	2.6e-46	GUT_GENOME283627	MAG	ZellerG_2014__CCIS44743950ST-4-0__bin.43	49.47	104582
GUT_GENOME283627_02144	Carboxypeptidase G2	d__Bacteria;p__Firmicutes_A;c__Clostridia;o__Lachnospirales;f__Lachnospiraceae;g__CAG-81;s__	p__Firmicutes_A	1.1e-19	67.3	319	1	[[1, 360]]	1.4e-19	GUT_GENOME283627	MAG	ZellerG_2014__CCIS44743950ST-4-0__bin.43	49.47	104582
GUT_GENOME283627_01427	p-aminobenzoyl-glutamate hydrolase subunit B	d__Bacteria;p__Firmicutes_A;c__Clostridia;o__Lachnospirales;f__Lachnospiraceae;g__CAG-81;s__	p__Firmicutes_A	1.6e-08	30.5	236	1	[[38, 321]]	2.1e-08	GUT_GENOME283627	MAG	ZellerG_2014__CCIS44743950ST-4-0__bin.43	49.47	104582
GUT_GENOME177425_00904	Peptidase T	d__Bacteria;p__Firmicutes_C;c__Negativicutes;o__Veillonellales;f__Negativicoccaceae;g__Negativicoccus;s__Negativicoccus succinicivorans	p__Firmicutes_C	3.4e-22	74.6	333	1	[[1, 350]]	4.1e-22	GUT_GENOME177425	MAG	SRR3132441_bin.7	51.96	102903
GUT_GENOME177425_00134	Peptidase T	d__Bacteria;p__Firmicutes_C;c__Negativicutes;o__Veillonellales;f__Negativicoccaceae;g__Negativicoccus;s__Negativicoccus succinicivorans	p__Firmicutes_C	3.1e-06	22	282	1	[[137, 418]]	5.4e-06	GUT_GENOME177425	MAG	SRR3132441_bin.7	51.96	102903
GUT_GENOME185532_03437	Carboxypeptidase G2	d__Bacteria;p__Firmicutes_A;c__Clostridia;o__Lachnospirales;f__Lachnospiraceae;g__Clostridium_M;s__	p__Firmicutes_A	7.6e-41	137.8	384	1	[[3, 384]]	1e-40	GUT_GENOME185532	MAG	SRR4451547_bin.12	58.03	102946
GUT_GENOME185532_02785	Carboxypeptidase G2	d__Bacteria;p__Firmicutes_A;c__Clostridia;o__Lachnospirales;f__Lachnospiraceae;g__Clostridium_M;s__	p__Firmicutes_A	2e-39	133.1	372	1	[[2, 374]]	3.1e-39	GUT_GENOME185532	MAG	SRR4451547_bin.12	58.03	102946
GUT_GENOME185532_03309	Carboxypeptidase G2	d__Bacteria;p__Firmicutes_A;c__Clostridia;o__Lachnospirales;f__Lachnospiraceae;g__Clostridium_M;s__	p__Firmicutes_A	9.3e-29	98	385	1	[[4, 391]]	1.3e-28	GUT_GENOME185532	MAG	SRR4451547_bin.12	58.03	102946
GUT_GENOME185532_01791	Carboxypeptidase G2	d__Bacteria;p__Firmicutes_A;c__Clostridia;o__Lachnospirales;f__Lachnospiraceae;g__Clostridium_M;s__	p__Firmicutes_A	2.8e-22	76.6	311	1	[[5, 388]]	3.2e-22	GUT_GENOME185532	MAG	SRR4451547_bin.12	58.03	102946
GUT_GENOME185532_01946	Acetylornithine deacetylase	d__Bacteria;p__Firmicutes_A;c__Clostridia;o__Lachnospirales;f__Lachnospiraceae;g__Clostridium_M;s__	p__Firmicutes_A	1.1e-09	35.2	266	1	[[74, 393]]	1.5e-09	GUT_GENOME185532	MAG	SRR4451547_bin.12	58.03	102946
GUT_GENOME018678_00916	Peptidase T	d__Bacteria;p__Actinobacteriota;c__Coriobacteriia;o__Coriobacteriales;f__Eggerthellaceae;g__Senegalimassilia;s__	p__Actinobacteriota	2.1e-10	36.4	262	1	[[1, 283]]	3e-10	GUT_GENOME018678	MAG	CM_madagascar__A83_02_1FE__bin.1	61.56	100611
GUT_GENOME019034_01145	Carboxypeptidase G2	d__Bacteria;p__Firmicutes_C;c__Negativicutes;o__Veillonellales;f__Dialisteraceae;g__Dialister;s__	p__Firmicutes_C	3.3e-51	170.9	387	1	[[3, 383]]	4e-51	GUT_GENOME019034	MAG	CM_madagascar__A95_01_1FE__bin.5	52.14	100630
GUT_GENOME019034_01144	Carboxypeptidase G2	d__Bacteria;p__Firmicutes_C;c__Negativicutes;o__Veillonellales;f__Dialisteraceae;g__Dialister;s__	p__Firmicutes_C	7.8e-47	156.5	371	1	[[6, 383]]	1.1e-46	GUT_GENOME019034	MAG	CM_madagascar__A95_01_1FE__bin.5	52.14	100630
GUT_GENOME019034_00672	Carboxypeptidase G2	d__Bacteria;p__Firmicutes_C;c__Negativicutes;o__Veillonellales;f__Dialisteraceae;g__Dialister;s__	p__Firmicutes_C	5.5e-15	51.5	273	1	[[2, 291]]	7.3e-15	GUT_GENOME019034	MAG	CM_madagascar__A95_01_1FE__bin.5	52.14	100630
GUT_GENOME183774_01351	putative succinyl-diaminopimelate desuccinylase	d__Bacteria;p__Firmicutes_A;c__Clostridia;o__Clostridiales;f__Clostridiaceae;g__Clostridium_B;s__	p__Firmicutes_A	4.7e-15	52	228	1	[[13, 292]]	6.6e-15	GUT_GENOME183774	MAG	SRR4408054_bin.8	35.59	102938
GUT_GENOME181927_00485	putative succinyl-diaminopimelate desuccinylase	d__Bacteria;p__Actinobacteriota;c__Coriobacteriia;o__Coriobacteriales;f__Coriobacteriaceae;g__Collinsella;s__	p__Actinobacteriota	4.9e-11	38.5	263	1	[[11, 388]]	5.7e-11	GUT_GENOME181927	MAG	SRR4305073_bin.1	60.2	102932
GUT_GENOME185278_02137	putative hydrolase YxeP	d__Bacteria;p__Firmicutes_A;c__Clostridia;o__Lachnospirales;f__Lachnospiraceae;g__Bariatricus;s__Bariatricus massiliensis	p__Firmicutes_A	2.7e-07	27.1	229	1	[[21, 347]]	5.4e-07	GUT_GENOME185278	MAG	SRR4444801_bin.32	45.26	102945
GUT_GENOME185278_02483	Acetylornithine deacetylase	d__Bacteria;p__Firmicutes_A;c__Clostridia;o__Lachnospirales;f__Lachnospiraceae;g__Bariatricus;s__Bariatricus massiliensis	p__Firmicutes_A	6.2e-07	25.9	235	1	[[1, 262]]	8.9e-07	GUT_GENOME185278	MAG	SRR4444801_bin.32	45.26	102945
GUT_GENOME001208_02675	Carboxypeptidase G2	d__Bacteria;p__Firmicutes_A;c__Clostridia;o__Lachnospirales;f__Lachnospiraceae;g__CAG-81;s__CAG-81 sp900066535	p__Firmicutes_A	1.1e-52	176.7	381	1	[[1, 375]]	1.8e-52	GUT_GENOME001208	Isolate	AF36-10	47.99	100205	2.82589	0.00587158
GUT_GENOME001208_00104	Carboxypeptidase G2	d__Bacteria;p__Firmicutes_A;c__Clostridia;o__Lachnospirales;f__Lachnospiraceae;g__CAG-81;s__CAG-81 sp900066535	p__Firmicutes_A	1.5e-51	173	377	1	[[2, 374]]	2.5e-51	GUT_GENOME001208	Isolate	AF36-10	47.99	100205	2.82589	0.00587158
GUT_GENOME001208_00102	Carboxypeptidase G2	d__Bacteria;p__Firmicutes_A;c__Clostridia;o__Lachnospirales;f__Lachnospiraceae;g__CAG-81;s__CAG-81 sp900066535	p__Firmicutes_A	2.5e-47	159	385	1	[[4, 388]]	3.1e-47	GUT_GENOME001208	Isolate	AF36-10	47.99	100205	2.82589	0.00587158
GUT_GENOME001208_00309	Peptidase T	d__Bacteria;p__Firmicutes_A;c__Clostridia;o__Lachnospirales;f__Lachnospiraceae;g__CAG-81;s__CAG-81 sp900066535	p__Firmicutes_A	1.7e-19	67.3	324	1	[[1, 355]]	2.1e-19	GUT_GENOME001208	Isolate	AF36-10	47.99	100205	2.82589	0.00587158
GUT_GENOME001208_00699	p-aminobenzoyl-glutamate hydrolase subunit B	d__Bacteria;p__Firmicutes_A;c__Clostridia;o__Lachnospirales;f__Lachnospiraceae;g__CAG-81;s__CAG-81 sp900066535	p__Firmicutes_A	1.5e-08	31.2	232	1	[[37, 321]]	1.9e-08	GUT_GENOME001208	Isolate	AF36-10	47.99	100205	2.82589	0.00587158
GUT_GENOME001419_01678	putative succinyl-diaminopimelate desuccinylase	d__Bacteria;p__Actinobacteriota;c__Coriobacteriia;o__Coriobacteriales;f__Coriobacteriaceae;g__Collinsella;s__	p__Actinobacteriota	5.2e-10	35.2	312	1	[[9, 392]]	6.7e-10	GUT_GENOME001419	Isolate	AM17-1	59.96	100237
GUT_GENOME163846_01036	putative succinyl-diaminopimelate desuccinylase	d__Bacteria;p__Actinobacteriota;c__Coriobacteriia;o__Coriobacteriales;f__Coriobacteriaceae;g__Collinsella;s__	p__Actinobacteriota	2.1e-13	46	320	1	[[8, 388]]	2.6e-13	GUT_GENOME163846	MAG	SchirmerM_2016__G89187__bin.20	59.86	102765
GUT_GENOME161027_01145	putative succinyl-diaminopimelate desuccinylase	d__Bacteria;p__Actinobacteriota;c__Coriobacteriia;o__Coriobacteriales;f__Coriobacteriaceae;g__Collinsella;s__	p__Actinobacteriota	3.4e-11	38.9	322	1	[[8, 389]]	4.2e-11	GUT_GENOME161027	MAG	SchirmerM_2016__G88870__bin.7	60.07	102733
GUT_GENOME161911_00433	Acetylornithine deacetylase	d__Bacteria;p__Actinobacteriota;c__Coriobacteriia;o__Coriobacteriales;f__Coriobacteriaceae;g__Collinsella;s__	p__Actinobacteriota	1.1e-10	37.3	320	1	[[8, 386]]	1.4e-10	GUT_GENOME161911	MAG	SchirmerM_2016__G88974__bin.5	59.88	102744
GUT_GENOME169909_00747	Peptidase T	d__Bacteria;p__Firmicutes_C;c__Negativicutes;o__Veillonellales;f__Dialisteraceae;g__Dialister;s__	p__Firmicutes_C	2.6e-22	75.2	253	1	[[8, 285]]	3.5e-22	GUT_GENOME169909	MAG	SRR1757434_bin.5	43.34	102792
GUT_GENOME083297_01202	Carboxypeptidase G2	d__Bacteria;p__Firmicutes_A;c__Clostridia;o__Lachnospirales;f__Anaerotignaceae;g__;s__	p__Firmicutes_A	5.3e-43	143.6	314	1	[[3, 369]]	6.8e-43	GUT_GENOME083297	MAG	ERS537280_49	37.6	101118
GUT_GENOME083297_01521	Carboxypeptidase G2	d__Bacteria;p__Firmicutes_A;c__Clostridia;o__Lachnospirales;f__Anaerotignaceae;g__;s__	p__Firmicutes_A	3.9e-36	121	388	1	[[2, 383]]	5.2e-36	GUT_GENOME083297	MAG	ERS537280_49	37.6	101118
GUT_GENOME083297_00152	putative hydrolase YxeP	d__Bacteria;p__Firmicutes_A;c__Clostridia;o__Lachnospirales;f__Anaerotignaceae;g__;s__	p__Firmicutes_A	3.4e-08	28.9	258	1	[[31, 371]]	4.2e-08	GUT_GENOME083297	MAG	ERS537280_49	37.6	101118
GUT_GENOME280428_00703	putative succinyl-diaminopimelate desuccinylase	d__Bacteria;p__Actinobacteriota;c__Coriobacteriia;o__Coriobacteriales;f__Coriobacteriaceae;g__Collinsella;s__	p__Actinobacteriota	6.9e-11	37.9	307	1	[[9, 388]]	8.7e-11	GUT_GENOME280428	MAG	ZeeviD_2015__PNP_Validation_13__bin.63	60.31	104524
GUT_GENOME282877_01548	putative succinyl-diaminopimelate desuccinylase	d__Bacteria;p__Actinobacteriota;c__Coriobacteriia;o__Coriobacteriales;f__Coriobacteriaceae;g__Collinsella;s__	p__Actinobacteriota	2.2e-10	36.3	320	1	[[9, 383]]	2.8e-10	GUT_GENOME282877	MAG	ZellerG_2014__CCIS22906510ST-20-0__bin.39	60.13	104553
GUT_GENOME179927_01574	putative succinyl-diaminopimelate desuccinylase	d__Bacteria;p__Actinobacteriota;c__Coriobacteriia;o__Coriobacteriales;f__Coriobacteriaceae;g__Collinsella;s__	p__Actinobacteriota	2e-11	39.7	321	1	[[9, 364]]	2.6e-11	GUT_GENOME179927	MAG	SRR3737005_bin.8	60.24	102917
GUT_GENOME191958_01855	Succinyl-diaminopimelate desuccinylase	d__Bacteria;p__Firmicutes_A;c__Clostridia;o__Lachnospirales;f__Lachnospiraceae;g__Marvinbryantia;s__	p__Firmicutes_A	1.4e-10	37.5	229	1	[[27, 290]]	1.8e-10	GUT_GENOME191958	MAG	SRR5056891_bin.33	43.12	102989
GUT_GENOME180601_00988	putative succinyl-diaminopimelate desuccinylase	d__Bacteria;p__Actinobacteriota;c__Coriobacteriia;o__Coriobacteriales;f__Coriobacteriaceae;g__Collinsella;s__	p__Actinobacteriota	6.9e-11	37.1	317	1	[[9, 395]]	8.5e-11	GUT_GENOME180601	MAG	SRR3917697_bin.34	60.36	102928
GUT_GENOME001678_00211	putative succinyl-diaminopimelate desuccinylase	d__Bacteria;p__Actinobacteriota;c__Coriobacteriia;o__Coriobacteriales;f__Coriobacteriaceae;g__Collinsella;s__	p__Actinobacteriota	2.1e-10	36.5	320	1	[[8, 388]]	2.7e-10	GUT_GENOME001678	Isolate	AM33-4BH	59.76	100260
GUT_GENOME002158_02038	Putative succinyl-diaminopimelate desuccinylase DapE	d__Bacteria;p__Bacteroidota;c__Bacteroidia;o__Bacteroidales;f__Tannerellaceae;g__Parabacteroides;s__	p__Bacteroidota	7.7e-09	32.6	236	1	[[10, 293]]	9.2e-09	GUT_GENOME002158	MAG	BackhedF_2015__SID10_M__bin.16	43.14	100284
GUT_GENOME001354_01285	Carboxypeptidase G2	d__Bacteria;p__Proteobacteria;c__Gammaproteobacteria;o__Burkholderiales;f__Burkholderiaceae;g__Duodenibacillus;s__	p__Proteobacteria	7.7e-42	140.1	371	1	[[1, 369]]	9.9e-42	GUT_GENOME001354	Isolate	AM11-39	55.62	100225	1.00273	0.0224762
GUT_GENOME001354_01498	Succinyl-diaminopimelate desuccinylase	d__Bacteria;p__Proteobacteria;c__Gammaproteobacteria;o__Burkholderiales;f__Burkholderiaceae;g__Duodenibacillus;s__	p__Proteobacteria	8.1e-07	24.6	284	1	[[24, 369]]	1.1e-06	GUT_GENOME001354	Isolate	AM11-39	55.62	100225	1.00273	0.0224762
GUT_GENOME001636_02356	Carboxypeptidase G2	d__Bacteria;p__Firmicutes_A;c__Clostridia;o__Lachnospirales;f__Lachnospiraceae;g__CAG-81;s__CAG-81 sp900066055	p__Firmicutes_A	5.3e-53	177.5	381	1	[[1, 375]]	9.1e-53	GUT_GENOME001636	Isolate	AM30-24	48.24	100255	0.0911577	0.008965
GUT_GENOME001636_01687	Carboxypeptidase G2	d__Bacteria;p__Firmicutes_A;c__Clostridia;o__Lachnospirales;f__Lachnospiraceae;g__CAG-81;s__CAG-81 sp900066055	p__Firmicutes_A	1.3e-51	173	377	1	[[2, 374]]	2.2e-51	GUT_GENOME001636	Isolate	AM30-24	48.24	100255	0.0911577	0.008965
GUT_GENOME001636_01689	Carboxypeptidase G2	d__Bacteria;p__Firmicutes_A;c__Clostridia;o__Lachnospirales;f__Lachnospiraceae;g__CAG-81;s__CAG-81 sp900066055	p__Firmicutes_A	1.4e-47	159.6	385	1	[[4, 388]]	1.8e-47	GUT_GENOME001636	Isolate	AM30-24	48.24	100255	0.0911577	0.008965
GUT_GENOME001636_00694	Carboxypeptidase G2	d__Bacteria;p__Firmicutes_A;c__Clostridia;o__Lachnospirales;f__Lachnospiraceae;g__CAG-81;s__CAG-81 sp900066055	p__Firmicutes_A	1.1e-19	67.7	324	1	[[1, 355]]	1.4e-19	GUT_GENOME001636	Isolate	AM30-24	48.24	100255	0.0911577	0.008965
GUT_GENOME001636_01501	p-aminobenzoyl-glutamate hydrolase subunit B	d__Bacteria;p__Firmicutes_A;c__Clostridia;o__Lachnospirales;f__Lachnospiraceae;g__CAG-81;s__CAG-81 sp900066055	p__Firmicutes_A	1.1e-09	34.8	245	1	[[37, 321]]	1.4e-09	GUT_GENOME001636	Isolate	AM30-24	48.24	100255	0.0911577	0.008965
GUT_GENOME001372_01676	Acetylornithine deacetylase	d__Bacteria;p__Actinobacteriota;c__Coriobacteriia;o__Coriobacteriales;f__Coriobacteriaceae;g__Collinsella;s__Collinsella sp002232035	p__Actinobacteriota	9.3e-11	37.7	321	1	[[8, 386]]	1.2e-10	GUT_GENOME001372	Isolate	AM13-34	59.8	100228
GUT_GENOME158646_01715	Carboxypeptidase G2	d__Bacteria;p__Firmicutes_A;c__Clostridia;o__Oscillospirales;f__Acutalibacteraceae;g__;s__	p__Firmicutes_A	4.3e-41	137.9	375	1	[[8, 379]]	6e-41	GUT_GENOME158646	MAG	RaymondF_2016__P21E90__bin.84	58.05	102702
GUT_GENOME158646_01179	N-formyl-4-amino-5-aminomethyl-2-methylpyrimidine deformylase	d__Bacteria;p__Firmicutes_A;c__Clostridia;o__Oscillospirales;f__Acutalibacteraceae;g__;s__	p__Firmicutes_A	2.4e-09	33.3	238	1	[[1, 312]]	3e-09	GUT_GENOME158646	MAG	RaymondF_2016__P21E90__bin.84	58.05	102702
GUT_GENOME158646_01930	Putative dipeptidase	d__Bacteria;p__Firmicutes_A;c__Clostridia;o__Oscillospirales;f__Acutalibacteraceae;g__;s__	p__Firmicutes_A	2e-06	23.6	241	3	[[7, 241], [241, 278], [323, 373]]	0.00028	GUT_GENOME158646	MAG	RaymondF_2016__P21E90__bin.84	58.05	102702
GUT_GENOME164337_01165	putative succinyl-diaminopimelate desuccinylase	d__Bacteria;p__Actinobacteriota;c__Coriobacteriia;o__Coriobacteriales;f__Coriobacteriaceae;g__Collinsella;s__	p__Actinobacteriota	5.2e-11	38.3	318	1	[[8, 386]]	6.4e-11	GUT_GENOME164337	MAG	SRR1196448_bin.11	59.98	102775
GUT_GENOME161955_01008	Acetylornithine deacetylase	d__Bacteria;p__Actinobacteriota;c__Coriobacteriia;o__Coriobacteriales;f__Coriobacteriaceae;g__Collinsella;s__	p__Actinobacteriota	1.8e-11	39.9	320	1	[[8, 387]]	2.2e-11	GUT_GENOME161955	MAG	SchirmerM_2016__G88979__bin.9	60.22	102745
GUT_GENOME143493_01871	putative succinyl-diaminopimelate desuccinylase	d__Bacteria;p__Firmicutes;c__Bacilli;o__Lactobacillales;f__Lactobacillaceae;g__Lactobacillus_G;s__Lactobacillus_G kefiri	p__Firmicutes	2.7e-17	59.6	255	1	[[2, 348]]	3.8e-17	GUT_GENOME143493	Isolate	PATRIC_33962_6	41.78	102472
GUT_GENOME256520_01493	N-acetyl-lysine deacetylase	d__Bacteria;p__Firmicutes_A;c__Clostridia;o__Oscillospirales;f__Acutalibacteraceae;g__;s__	p__Firmicutes_A	1.3e-07	27	228	1	[[59, 363]]	1.6e-07	GUT_GENOME256520	MAG	XieH_2016__YSZC12003_37101__bin.86	57.3	104106	0.0911577	0.00228055
GUT_GENOME127797_00418	Peptidase T	d__Bacteria;p__Firmicutes_A;c__Clostridia;o__Christensenellales;f__UBA1750;g__UBA7102;s__	p__Firmicutes_A	1.7e-16	57.1	283	1	[[1, 308]]	2.1e-16	GUT_GENOME127797	MAG	LiuW_2016__SRR3992987__bin.58	57.96	102099	0.638104	0.00653392
GUT_GENOME127797_01464	Putative dipeptidase	d__Bacteria;p__Firmicutes_A;c__Clostridia;o__Christensenellales;f__UBA1750;g__UBA7102;s__	p__Firmicutes_A	5.8e-06	22.4	238	2	[[0, 227], [242, 310]]	0.0012	GUT_GENOME127797	MAG	LiuW_2016__SRR3992987__bin.58	57.96	102099	0.638104	0.00653392
GUT_GENOME121405_00794	putative succinyl-diaminopimelate desuccinylase	d__Bacteria;p__Actinobacteriota;c__Coriobacteriia;o__Coriobacteriales;f__Coriobacteriaceae;g__Collinsella;s__	p__Actinobacteriota	2e-10	36.4	251	1	[[38, 385]]	2.4e-10	GUT_GENOME121405	MAG	LiJ_2014__V1.FI17__bin.51	59.95	102013
GUT_GENOME178919_01409	Carboxypeptidase G2	d__Bacteria;p__Firmicutes_C;c__Negativicutes;o__Sporomusales;f__Acetonemaceae;g__Anaerosporomusa;s__	p__Firmicutes_C	1.3e-100	334.6	392	1	[[0, 385]]	1.5e-100	GUT_GENOME178919	MAG	SRR3466404_bin.32	54.58	102907
GUT_GENOME178919_01528	Carboxypeptidase G2	d__Bacteria;p__Firmicutes_C;c__Negativicutes;o__Sporomusales;f__Acetonemaceae;g__Anaerosporomusa;s__	p__Firmicutes_C	3.2e-65	218	228	1	[[0, 225]]	3.8e-65	GUT_GENOME178919	MAG	SRR3466404_bin.32	54.58	102907
GUT_GENOME178919_01411	Carboxypeptidase G2	d__Bacteria;p__Firmicutes_C;c__Negativicutes;o__Sporomusales;f__Acetonemaceae;g__Anaerosporomusa;s__	p__Firmicutes_C	1.9e-58	195.6	384	1	[[0, 379]]	2.2e-58	GUT_GENOME178919	MAG	SRR3466404_bin.32	54.58	102907
GUT_GENOME178919_01572	Carboxypeptidase G2	d__Bacteria;p__Firmicutes_C;c__Negativicutes;o__Sporomusales;f__Acetonemaceae;g__Anaerosporomusa;s__	p__Firmicutes_C	3.3e-51	171.7	395	1	[[2, 389]]	4.4e-51	GUT_GENOME178919	MAG	SRR3466404_bin.32	54.58	102907
GUT_GENOME178919_01940	Carboxypeptidase G2	d__Bacteria;p__Firmicutes_C;c__Negativicutes;o__Sporomusales;f__Acetonemaceae;g__Anaerosporomusa;s__	p__Firmicutes_C	1.2e-50	169.9	373	2	[[2, 238], [249, 409]]	6.9e-38	GUT_GENOME178919	MAG	SRR3466404_bin.32	54.58	102907
GUT_GENOME178919_01568	Carboxypeptidase G2	d__Bacteria;p__Firmicutes_C;c__Negativicutes;o__Sporomusales;f__Acetonemaceae;g__Anaerosporomusa;s__	p__Firmicutes_C	4.8e-42	141.5	389	1	[[4, 390]]	6.1e-42	GUT_GENOME178919	MAG	SRR3466404_bin.32	54.58	102907
GUT_GENOME178919_00141	Peptidase T	d__Bacteria;p__Firmicutes_C;c__Negativicutes;o__Sporomusales;f__Acetonemaceae;g__Anaerosporomusa;s__	p__Firmicutes_C	9.7e-15	51.5	248	1	[[17, 374]]	1.2e-14	GUT_GENOME178919	MAG	SRR3466404_bin.32	54.58	102907
GUT_GENOME178919_02170	Peptidase T	d__Bacteria;p__Firmicutes_C;c__Negativicutes;o__Sporomusales;f__Acetonemaceae;g__Anaerosporomusa;s__	p__Firmicutes_C	5.1e-11	39.3	259	1	[[1, 297]]	6.4e-11	GUT_GENOME178919	MAG	SRR3466404_bin.32	54.58	102907
GUT_GENOME178919_02158	N-acetyldiaminopimelate deacetylase	d__Bacteria;p__Firmicutes_C;c__Negativicutes;o__Sporomusales;f__Acetonemaceae;g__Anaerosporomusa;s__	p__Firmicutes_C	1.5e-06	24.5	258	1	[[30, 313]]	2.8e-06	GUT_GENOME178919	MAG	SRR3466404_bin.32	54.58	102907
GUT_GENOME189179_00995	putative succinyl-diaminopimelate desuccinylase	d__Bacteria;p__Actinobacteriota;c__Coriobacteriia;o__Coriobacteriales;f__Coriobacteriaceae;g__Collinsella;s__	p__Actinobacteriota	9.9e-11	37.4	342	1	[[9, 394]]	1.2e-10	GUT_GENOME189179	MAG	SRR5056698_bin.29	60.19	102970
GUT_GENOME180274_01294	putative hydrolase YxeP	d__Bacteria;p__Firmicutes_A;c__Clostridia;o__Oscillospirales;f__Oscillospiraceae;g__CAG-83;s__CAG-83 sp000431575	p__Firmicutes_A	4.7e-11	38.4	280	1	[[30, 339]]	7e-11	GUT_GENOME180274	MAG	SRR3737031_bin.16	60.71	102926	5.10483	0.00816064
GUT_GENOME249850_01032	Carboxypeptidase G2	d__Bacteria;p__Proteobacteria;c__Gammaproteobacteria;o__Burkholderiales;f__Burkholderiaceae;g__Sutterella;s__	p__Proteobacteria	1.2e-45	152.8	372	1	[[1, 367]]	1.5e-45	GUT_GENOME249850	MAG	WenC_2017__RA047__bin.4	61.87	103914
GUT_GENOME249850_00773	Carboxypeptidase G2	d__Bacteria;p__Proteobacteria;c__Gammaproteobacteria;o__Burkholderiales;f__Burkholderiaceae;g__Sutterella;s__	p__Proteobacteria	3.5e-44	147.9	379	1	[[2, 371]]	4.3e-44	GUT_GENOME249850	MAG	WenC_2017__RA047__bin.4	61.87	103914
GUT_GENOME249850_01539	Carboxypeptidase G2	d__Bacteria;p__Proteobacteria;c__Gammaproteobacteria;o__Burkholderiales;f__Burkholderiaceae;g__Sutterella;s__	p__Proteobacteria	1.9e-41	138.9	410	1	[[2, 418]]	2.5e-41	GUT_GENOME249850	MAG	WenC_2017__RA047__bin.4	61.87	103914
GUT_GENOME251983_00853	Carboxypeptidase G2	d__Bacteria;p__Proteobacteria;c__Gammaproteobacteria;o__Burkholderiales;f__Burkholderiaceae;g__CAG-521;s__	p__Proteobacteria	4.3e-52	173.6	379	1	[[1, 371]]	5.8e-52	GUT_GENOME251983	MAG	XieH_2016__YSZC12003_35562__bin.59	48.03	103969
GUT_GENOME249773_01029	putative succinyl-diaminopimelate desuccinylase	d__Bacteria;p__Actinobacteriota;c__Coriobacteriia;o__Coriobacteriales;f__Coriobacteriaceae;g__Collinsella;s__	p__Actinobacteriota	3.3e-11	39	322	1	[[8, 383]]	4.1e-11	GUT_GENOME249773	MAG	WenC_2017__RA042__bin.4	59.8	103913
GUT_GENOME250230_01446	Carboxypeptidase G2	d__Bacteria;p__Fusobacteriota;c__Fusobacteriia;o__Fusobacteriales;f__Fusobacteriaceae;g__Fusobacterium_A;s__	p__Fusobacteriota	3.3e-39	131.5	376	1	[[0, 369]]	5e-39	GUT_GENOME250230	MAG	WenC_2017__RA074__bin.38	29.12	103919
GUT_GENOME250230_01517	Peptidase T	d__Bacteria;p__Fusobacteriota;c__Fusobacteriia;o__Fusobacteriales;f__Fusobacteriaceae;g__Fusobacterium_A;s__	p__Fusobacteriota	3.1e-20	68.9	324	1	[[25, 371]]	5.3e-20	GUT_GENOME250230	MAG	WenC_2017__RA074__bin.38	29.12	103919
GUT_GENOME250230_00612	Peptidase T	d__Bacteria;p__Fusobacteriota;c__Fusobacteriia;o__Fusobacteriales;f__Fusobacteriaceae;g__Fusobacterium_A;s__	p__Fusobacteriota	6.4e-13	44.8	366	1	[[2, 365]]	8.7e-13	GUT_GENOME250230	MAG	WenC_2017__RA074__bin.38	29.12	103919
GUT_GENOME153239_00760	Carboxypeptidase G2	d__Bacteria;p__Firmicutes_A;c__Clostridia;o__Peptostreptococcales;f__Anaerovoracaceae;g__Mogibacterium;s__Mogibacterium timonense	p__Firmicutes_A	3.1e-23	78.4	252	1	[[3, 260]]	3.8e-23	GUT_GENOME153239	MAG	QinJ_2012__T2D-101__bin.7	53.34	102597
GUT_GENOME143191_01131	putative succinyl-diaminopimelate desuccinylase	d__Bacteria;p__Actinobacteriota;c__Coriobacteriia;o__Coriobacteriales;f__Atopobiaceae;g__Olsenella_E;s__	p__Actinobacteriota	2.6e-08	29.5	301	1	[[4, 330]]	3.5e-08	GUT_GENOME143191	Isolate	PATRIC_2292441_3	65.5	102450
GUT_GENOME143421_02205	putative succinyl-diaminopimelate desuccinylase	d__Bacteria;p__Firmicutes;c__Bacilli;o__Lactobacillales;f__Enterococcaceae;g__Enterococcus;s__Enterococcus caccae	p__Firmicutes	2.8e-16	56.5	277	1	[[2, 330]]	3.6e-16	GUT_GENOME143421	Isolate	PATRIC_317735_3	35.76	102468
GUT_GENOME143421_01131	putative succinyl-diaminopimelate desuccinylase	d__Bacteria;p__Firmicutes;c__Bacilli;o__Lactobacillales;f__Enterococcaceae;g__Enterococcus;s__Enterococcus caccae	p__Firmicutes	1.5e-15	54.2	312	1	[[0, 362]]	1.9e-15	GUT_GENOME143421	Isolate	PATRIC_317735_3	35.76	102468
GUT_GENOME143604_02629	Carboxypeptidase G2	d__Bacteria;p__Fusobacteriota;c__Fusobacteriia;o__Fusobacteriales;f__Fusobacteriaceae;g__Fusobacterium_A;s__Fusobacterium_A varium_B	p__Fusobacteriota	1.7e-41	139.6	377	1	[[0, 369]]	2.7e-41	GUT_GENOME143604	Isolate	PATRIC_469618_10	29.35	102486
GUT_GENOME143604_00234	Carboxypeptidase G2	d__Bacteria;p__Fusobacteriota;c__Fusobacteriia;o__Fusobacteriales;f__Fusobacteriaceae;g__Fusobacterium_A;s__Fusobacterium_A varium_B	p__Fusobacteriota	8.7e-34	114.2	388	1	[[5, 391]]	1.1e-33	GUT_GENOME143604	Isolate	PATRIC_469618_10	29.35	102486
GUT_GENOME143604_01676	putative hydrolase YxeP	d__Bacteria;p__Fusobacteriota;c__Fusobacteriia;o__Fusobacteriales;f__Fusobacteriaceae;g__Fusobacterium_A;s__Fusobacterium_A varium_B	p__Fusobacteriota	5.7e-09	32.4	259	1	[[55, 348]]	7.6e-09	GUT_GENOME143604	Isolate	PATRIC_469618_10	29.35	102486
GUT_GENOME143604_00022	Peptidase T	d__Bacteria;p__Fusobacteriota;c__Fusobacteriia;o__Fusobacteriales;f__Fusobacteriaceae;g__Fusobacterium_A;s__Fusobacterium_A varium_B	p__Fusobacteriota	6.7e-09	32.2	323	1	[[1, 362]]	8.4e-09	GUT_GENOME143604	Isolate	PATRIC_469618_10	29.35	102486
GUT_GENOME142612_00418	Carboxypeptidase G2	d__Bacteria;p__Proteobacteria;c__Gammaproteobacteria;o__Enterobacterales;f__Enterobacteriaceae;g__Proteus;s__Proteus sp001722135	p__Proteobacteria	1.6e-61	205.9	376	1	[[2, 377]]	1.9e-61	GUT_GENOME142612	Isolate	PATRIC_1898038_3	38.02	102415
GUT_GENOME143519_01802	Succinyl-diaminopimelate desuccinylase	d__Bacteria;p__Proteobacteria;c__Gammaproteobacteria;o__Xanthomonadales;f__Xanthomonadaceae;g__Stenotrophomonas;s__Stenotrophomonas maltophilia_F	p__Proteobacteria	3.3e-09	33.7	289	1	[[1, 368]]	4.3e-09	GUT_GENOME143519	Isolate	PATRIC_40324_221	66.61	102481
GUT_GENOME142628_01299	Acetylornithine deacetylase	d__Bacteria;p__Bacteroidota;c__Bacteroidia;o__Bacteroidales;f__Tannerellaceae;g__Parabacteroides;s__Parabacteroides chinchillae	p__Bacteroidota	5.3e-10	35.9	250	1	[[37, 312]]	6.9e-10	GUT_GENOME142628	Isolate	PATRIC_1944636_3	40.29	102418
GUT_GENOME149497_00872	Peptidase T	d__Bacteria;p__Firmicutes_A;c__Clostridia;o__Peptostreptococcales;f__Peptostreptococcaceae;g__Romboutsia;s__Romboutsia timonensis	p__Firmicutes_A	5.4e-22	75.2	372	1	[[1, 369]]	7.5e-22	GUT_GENOME149497	MAG	QinJ_2012__CON-102__bin.13	27.15	102563	6.65451	0.00827007
GUT_GENOME149497_01691	Hippurate hydrolase	d__Bacteria;p__Firmicutes_A;c__Clostridia;o__Peptostreptococcales;f__Peptostreptococcaceae;g__Romboutsia;s__Romboutsia timonensis	p__Firmicutes_A	7.1e-08	28.6	269	1	[[34, 324]]	1e-07	GUT_GENOME149497	MAG	QinJ_2012__CON-102__bin.13	27.15	102563	6.65451	0.00827007
GUT_GENOME145982_02236	Carboxypeptidase G2	d__Bacteria;p__Proteobacteria;c__Gammaproteobacteria;o__Enterobacterales;f__Enterobacteriaceae;g__Proteus;s__Proteus mirabilis	p__Proteobacteria	2.2e-69	231.8	381	1	[[1, 377]]	2.6e-69	GUT_GENOME145982	Isolate	PATRIC_584_430	39.29	102514
GUT_GENOME147138_03015	Carboxypeptidase G2	d__Bacteria;p__Proteobacteria;c__Gammaproteobacteria;o__Enterobacterales;f__Aeromonadaceae;g__Aeromonas;s__Aeromonas hydrophila	p__Proteobacteria	6.9e-51	171.1	380	1	[[4, 379]]	8.4e-51	GUT_GENOME147138	Isolate	PATRIC_644_65	61.04	102526
GUT_GENOME145378_02740	Acetylornithine deacetylase	d__Bacteria;p__Proteobacteria;c__Gammaproteobacteria;o__Enterobacterales;f__Enterobacteriaceae;g__Escherichia;s__Escherichia albertii	p__Proteobacteria	3.7e-15	53.4	232	1	[[0, 283]]	4.5e-15	GUT_GENOME145378	Isolate	PATRIC_562_7764	49.66	102507
GUT_GENOME286769_00468	Peptidase T	d__Bacteria;p__Firmicutes_A;c__Clostridia;o__Oscillospirales;f__Acutalibacteraceae;g__Eubacterium_R;s__Eubacterium_R sp003526845	p__Firmicutes_A	9.4e-10	34.2	278	1	[[2, 300]]	1.2e-09	GUT_GENOME286769	MAG	ZellerG_2014__CCMD93344354ST-21-0__bin.35	41.96	104643	1.82315	0.00711098
GUT_GENOME256714_01434	Peptidase T	d__Bacteria;p__Firmicutes_A;c__Clostridia;o__Lachnospirales;f__Lachnospiraceae;g__CAG-95;s__CAG-95 sp000438155	p__Firmicutes_A	8e-10	35	255	1	[[20, 366]]	8.9e-10	GUT_GENOME256714	MAG	XieH_2016__YSZC12003_37126__bin.93	44.03	104114	3.28168	0.0100593
GUT_GENOME070478_00073	Succinyl-diaminopimelate desuccinylase	d__Bacteria;p__Campylobacterota;c__Campylobacteria;o__Campylobacterales;f__Campylobacteraceae;g__Campylobacter;s__	p__Campylobacterota	7.6e-10	34	307	1	[[44, 365]]	1e-09	GUT_GENOME070478	MAG	ERS396357_87	46.79	101044
GUT_GENOME020741_01406	Acetylornithine deacetylase	d__Bacteria;p__Bacteroidota;c__Bacteroidia;o__Bacteroidales;f__UBA11471;g__UBA11471;s__UBA11471 sp000434215	p__Bacteroidota	7.3e-13	44.7	239	1	[[12, 295]]	1e-12	GUT_GENOME020741	MAG	CosteaPI_2017__mickey2-11-0-0__bin.53	45.63	100653	11.9417	0.00821174
GUT_GENOME018964_01730	Carboxypeptidase G2	d__Bacteria;p__Proteobacteria;c__Gammaproteobacteria;o__Burkholderiales;f__Burkholderiaceae;g__Duodenibacillus;s__	p__Proteobacteria	9.2e-37	123.4	322	1	[[4, 347]]	1.2e-36	GUT_GENOME018964	MAG	CM_madagascar__A94_02_1FE__bin.31	52.54	100624
GUT_GENOME018964_00207	Acetylornithine deacetylase	d__Bacteria;p__Proteobacteria;c__Gammaproteobacteria;o__Burkholderiales;f__Burkholderiaceae;g__Duodenibacillus;s__	p__Proteobacteria	4.3e-11	38.8	268	2	[[9, 72], [59, 299]]	9e-11	GUT_GENOME018964	MAG	CM_madagascar__A94_02_1FE__bin.31	52.54	100624
GUT_GENOME286887_00422	Carboxypeptidase G2	d__Bacteria;p__Firmicutes_A;c__Clostridia;o__Oscillospirales;f__Ruminococcaceae;g__Negativibacillus;s__	p__Firmicutes_A	7.2e-45	150.1	379	1	[[1, 380]]	9.3e-45	GUT_GENOME286887	MAG	ZellerG_2014__MMPU68403337ST__bin.4	57.36	104644	0.182315	0.00828213
GUT_GENOME285134_02386	Carboxypeptidase G2	d__Bacteria;p__Firmicutes_A;c__Clostridia;o__Oscillospirales;f__Ruminococcaceae;g__Anaerotruncus;s__Anaerotruncus sp900199635	p__Firmicutes_A	3.7e-33	111.9	317	1	[[8, 388]]	4.5e-33	GUT_GENOME285134	MAG	ZellerG_2014__CCIS87167916ST-4-0__bin.3	64.44	104618
GUT_GENOME285134_00371	putative succinyl-diaminopimelate desuccinylase	d__Bacteria;p__Firmicutes_A;c__Clostridia;o__Oscillospirales;f__Ruminococcaceae;g__Anaerotruncus;s__Anaerotruncus sp900199635	p__Firmicutes_A	8.4e-20	67.9	249	1	[[38, 322]]	1.2e-19	GUT_GENOME285134	MAG	ZellerG_2014__CCIS87167916ST-4-0__bin.3	64.44	104618
GUT_GENOME004333_01107	putative succinyl-diaminopimelate desuccinylase	d__Bacteria;p__Firmicutes_A;c__Clostridia;o__Lachnospirales;f__Lachnospiraceae;g__Blautia_A;s__	p__Firmicutes_A	4.7e-16	55.5	335	1	[[0, 352]]	5.9e-16	GUT_GENOME004333	MAG	BackhedF_2015__SID345_4M__bin.14	44.14	100301
GUT_GENOME239684_00532	Succinyl-diaminopimelate desuccinylase	d__Bacteria;p__Firmicutes_A;c__Clostridia;o__Oscillospirales;f__Oscillospiraceae;g__ER4;s__ER4 sp000765235	p__Firmicutes_A	5.7e-20	68.7	287	1	[[5, 317]]	7.5e-20	GUT_GENOME239684	Isolate	TF06-43	55.69	103686	64.722	0.0145284
GUT_GENOME239684_01190	Hippurate hydrolase	d__Bacteria;p__Firmicutes_A;c__Clostridia;o__Oscillospirales;f__Oscillospiraceae;g__ER4;s__ER4 sp000765235	p__Firmicutes_A	7.1e-08	28.9	281	1	[[25, 361]]	1.2e-07	GUT_GENOME239684	Isolate	TF06-43	55.69	103686	64.722	0.0145284
GUT_GENOME237868_00167	Peptidase T	d__Bacteria;p__Firmicutes_A;c__Clostridia;o__Lachnospirales;f__Lachnospiraceae;g__CAG-791;s__CAG-791 sp900315055	p__Firmicutes_A	1.5e-12	44	273	1	[[3, 284]]	2e-12	GUT_GENOME237868	MAG	SRS476348_23	55.99	103615
GUT_GENOME238795_00750	putative succinyl-diaminopimelate desuccinylase	d__Bacteria;p__Actinobacteriota;c__Coriobacteriia;o__Coriobacteriales;f__Coriobacteriaceae;g__Collinsella;s__	p__Actinobacteriota	1.5e-10	36.7	301	1	[[9, 388]]	1.9e-10	GUT_GENOME238795	MAG	SRS820602_35	60.23	103657
GUT_GENOME147630_01612	putative succinyl-diaminopimelate desuccinylase	d__Bacteria;p__Firmicutes;c__Bacilli;o__Lactobacillales;f__Lactobacillaceae;g__Lactobacillus_G;s__Lactobacillus_G parafarraginis	p__Firmicutes	2.3e-06	23.7	288	2	[[0, 103], [126, 346]]	0.017	GUT_GENOME147630	Isolate	PATRIC_797515_3	45.6	102542
GUT_GENOME147796_02023	putative succinyl-diaminopimelate desuccinylase	d__Bacteria;p__Firmicutes;c__Bacilli;o__Staphylococcales;f__Staphylococcaceae;g__Staphylococcus;s__Staphylococcus argenteus	p__Firmicutes	1.9e-11	40.3	265	2	[[28, 228], [244, 386]]	1.7e-07	GUT_GENOME147796	Isolate	PATRIC_985002_151	32.36	102548
GUT_GENOME147796_01838	N-acetyldiaminopimelate deacetylase	d__Bacteria;p__Firmicutes;c__Bacilli;o__Staphylococcales;f__Staphylococcaceae;g__Staphylococcus;s__Staphylococcus argenteus	p__Firmicutes	6.4e-07	25.4	269	1	[[46, 333]]	8.9e-07	GUT_GENOME147796	Isolate	PATRIC_985002_151	32.36	102548
GUT_GENOME109963_02240	putative hydrolase YxeP	d__Bacteria;p__Firmicutes_A;c__Clostridia;o__Lachnospirales;f__Lachnospiraceae;g__CAG-590;s__	p__Firmicutes_A	5e-07	26.1	255	1	[[34, 307]]	7.4e-07	GUT_GENOME109963	MAG	LeChatelierE_2013__MH0149__bin.2	40.73	101797
GUT_GENOME108910_02066	Putative succinyl-diaminopimelate desuccinylase DapE	d__Bacteria;p__Firmicutes_A;c__Clostridia;o__UBA1212;f__UBA1255;g__;s__	p__Firmicutes_A	7e-11	38.3	326	1	[[41, 379]]	9.1e-11	GUT_GENOME108910	MAG	LeChatelierE_2013__MH0097__bin.6	48.64	101779	0.0911577	0.00934223
GUT_GENOME079106_00858	putative succinyl-diaminopimelate desuccinylase	d__Bacteria;p__Actinobacteriota;c__Coriobacteriia;o__Coriobacteriales;f__Coriobacteriaceae;g__Collinsella;s__	p__Actinobacteriota	1.9e-10	36.2	321	1	[[8, 391]]	2.4e-10	GUT_GENOME079106	MAG	ERS473306_16	59.85	101086
GUT_GENOME143137_01620	putative succinyl-diaminopimelate desuccinylase	d__Bacteria;p__Firmicutes_A;c__Clostridia;o__Lachnospirales;f__Lachnospiraceae;g__CHH4-2;s__CHH4-2 sp002899675	p__Firmicutes_A	1.5e-07	28.5	262	1	[[50, 344]]	2e-07	GUT_GENOME143137	Isolate	PATRIC_2067550_5	45.64	102439
GUT_GENOME143137_04118	Peptidase T	d__Bacteria;p__Firmicutes_A;c__Clostridia;o__Lachnospirales;f__Lachnospiraceae;g__CHH4-2;s__CHH4-2 sp002899675	p__Firmicutes_A	5.7e-07	26.6	229	1	[[21, 279]]	7.5e-07	GUT_GENOME143137	Isolate	PATRIC_2067550_5	45.64	102439
GUT_GENOME143138_01954	Carboxypeptidase G2	d__Bacteria;p__Actinobacteriota;c__Coriobacteriia;o__Coriobacteriales;f__Eggerthellaceae;g__Enteroscipio;s__Enteroscipio rubneri	p__Actinobacteriota	7.3e-14	48.1	284	1	[[2, 365]]	1.2e-13	GUT_GENOME143138	Isolate	PATRIC_2070686_3	62.44	102440
GUT_GENOME237201_01667	putative hydrolase YxeP	d__Bacteria;p__Firmicutes_A;c__Clostridia;o__Clostridiales;f__Clostridiaceae;g__Clostridium;s__	p__Firmicutes_A	2.6e-10	36.7	277	1	[[29, 329]]	3.8e-10	GUT_GENOME237201	MAG	SRS476270_33	30.21	103550
GUT_GENOME098313_00750	Carboxypeptidase G2	d__Bacteria;p__Firmicutes_C;c__Negativicutes;o__Acidaminococcales;f__Acidaminococcaceae;g__Acidaminococcus;s__	p__Firmicutes_C	2e-49	164.4	384	1	[[1, 374]]	2.3e-49	GUT_GENOME098313	MAG	HeQ_2017__SZAXPI029473-40__bin.1	49.2	101612
GUT_GENOME098313_00890	Carboxypeptidase G2	d__Bacteria;p__Firmicutes_C;c__Negativicutes;o__Acidaminococcales;f__Acidaminococcaceae;g__Acidaminococcus;s__	p__Firmicutes_C	7.8e-44	145.9	381	1	[[4, 384]]	1.5e-43	GUT_GENOME098313	MAG	HeQ_2017__SZAXPI029473-40__bin.1	49.2	101612
GUT_GENOME098313_00198	Carboxypeptidase G2	d__Bacteria;p__Firmicutes_C;c__Negativicutes;o__Acidaminococcales;f__Acidaminococcaceae;g__Acidaminococcus;s__	p__Firmicutes_C	1.7e-39	131.6	391	1	[[0, 392]]	2.2e-39	GUT_GENOME098313	MAG	HeQ_2017__SZAXPI029473-40__bin.1	49.2	101612
GUT_GENOME113646_00602	Carboxypeptidase G2	d__Bacteria;p__Proteobacteria;c__Gammaproteobacteria;o__Burkholderiales;f__Burkholderiaceae;g__CAG-521;s__	p__Proteobacteria	8.5e-52	172.4	379	1	[[1, 371]]	1.2e-51	GUT_GENOME113646	MAG	LeChatelierE_2013__MH0433__bin.14	49.26	101892
GUT_GENOME237516_02039	putative hydrolase YxeP	d__Bacteria;p__Firmicutes;c__Bacilli;o__Erysipelotrichales;f__Erysipelotrichaceae;g__Solobacterium;s__	p__Firmicutes	1.1e-07	27.7	253	1	[[94, 365]]	1.5e-07	GUT_GENOME237516	MAG	SRS476292_29	50.65	103586
GUT_GENOME137034_01167	putative hydrolase YxeP	d__Bacteria;p__Firmicutes_A;c__Clostridia;o__Clostridiales;f__Clostridiaceae;g__Clostridium;s__Clostridium sp001916075	p__Firmicutes_A	1.5e-06	24.1	270	1	[[29, 333]]	2.3e-06	GUT_GENOME137034	MAG	NielsenHB_2014__V1_CD41_0__bin.29	28.79	102190	0.820419	0.00889381
GUT_GENOME130008_00811	Carboxypeptidase G2	d__Bacteria;p__Firmicutes_A;c__Clostridia;o__Lachnospirales;f__Lachnospiraceae;g__CAG-882;s__	p__Firmicutes_A	8.3e-32	107.4	384	1	[[3, 396]]	1e-31	GUT_GENOME130008	MAG	LoombaR_2017__SID0009_rhg__bin.30	45.2	102131
GUT_GENOME137438_02382	N-formyl-4-amino-5-aminomethyl-2-methylpyrimidine deformylase	d__Bacteria;p__Firmicutes_A;c__Clostridia;o__Oscillospirales;f__Acutalibacteraceae;g__;s__	p__Firmicutes_A	1e-14	51	246	1	[[1, 255]]	1.5e-14	GUT_GENOME137438	MAG	NielsenHB_2014__V1_UC16_0__bin.10	50.3	102194	0.455789	0.0599302
GUT_GENOME098042_02650	Acetylornithine deacetylase	d__Bacteria;p__Firmicutes_A;c__Clostridia;o__Lachnospirales;f__Lachnospiraceae;g__Clostridium_M;s__	p__Firmicutes_A	3.1e-15	53.2	267	1	[[83, 409]]	4.2e-15	GUT_GENOME098042	MAG	HeQ_2017__RSZAXPI003105-143__bin.27	50.73	101606
GUT_GENOME098042_00070	N-acetyl-lysine deacetylase	d__Bacteria;p__Firmicutes_A;c__Clostridia;o__Lachnospirales;f__Lachnospiraceae;g__Clostridium_M;s__	p__Firmicutes_A	7.4e-09	32.2	316	1	[[71, 388]]	9.3e-09	GUT_GENOME098042	MAG	HeQ_2017__RSZAXPI003105-143__bin.27	50.73	101606
GUT_GENOME098042_01592	Succinyl-diaminopimelate desuccinylase	d__Bacteria;p__Firmicutes_A;c__Clostridia;o__Lachnospirales;f__Lachnospiraceae;g__Clostridium_M;s__	p__Firmicutes_A	8e-08	28.8	239	2	[[4, 239], [309, 358]]	3.1e-06	GUT_GENOME098042	MAG	HeQ_2017__RSZAXPI003105-143__bin.27	50.73	101606
GUT_GENOME100651_01125	putative hydrolase YxeP	d__Bacteria;p__Firmicutes_A;c__Clostridia;o__Oscillospirales;f__Oscillospiraceae;g__F23-B02;s__	p__Firmicutes_A	3.6e-08	28.7	244	1	[[30, 321]]	5e-08	GUT_GENOME100651	MAG	HMP_2012__SRS013687__bin.38	55.03	101650
GUT_GENOME009689_00742	Carboxypeptidase G2	d__Bacteria;p__Firmicutes_A;c__Clostridia;o__Oscillospirales;f__Ruminococcaceae;g__;s__	p__Firmicutes_A	4.2e-50	167	380	1	[[2, 388]]	5.7e-50	GUT_GENOME009689	MAG	Bengtsson-PalmeJ_2015__TRAVELRES48__bin.86	41.36	100425
GUT_GENOME009689_01390	hypothetical protein	d__Bacteria;p__Firmicutes_A;c__Clostridia;o__Oscillospirales;f__Ruminococcaceae;g__;s__	p__Firmicutes_A	6.1e-08	28.1	300	1	[[47, 376]]	8.1e-08	GUT_GENOME009689	MAG	Bengtsson-PalmeJ_2015__TRAVELRES48__bin.86	41.36	100425
GUT_GENOME112529_00470	Carboxypeptidase G2	d__Bacteria;p__Firmicutes_C;c__Negativicutes;o__Acidaminococcales;f__Acidaminococcaceae;g__Phascolarctobacterium_A;s__	p__Firmicutes_C	3.6e-48	160.9	381	1	[[2, 379]]	4.4e-48	GUT_GENOME112529	MAG	LeChatelierE_2013__MH0403__bin.36	50.08	101859
GUT_GENOME112529_01478	Carboxypeptidase G2	d__Bacteria;p__Firmicutes_C;c__Negativicutes;o__Acidaminococcales;f__Acidaminococcaceae;g__Phascolarctobacterium_A;s__	p__Firmicutes_C	1.8e-44	148.8	397	1	[[1, 391]]	2.3e-44	GUT_GENOME112529	MAG	LeChatelierE_2013__MH0403__bin.36	50.08	101859
GUT_GENOME112529_01742	Carboxypeptidase G2	d__Bacteria;p__Firmicutes_C;c__Negativicutes;o__Acidaminococcales;f__Acidaminococcaceae;g__Phascolarctobacterium_A;s__	p__Firmicutes_C	6.9e-41	136.9	370	2	[[5, 250], [246, 406]]	4.2e-33	GUT_GENOME112529	MAG	LeChatelierE_2013__MH0403__bin.36	50.08	101859
GUT_GENOME112529_00814	Peptidase T	d__Bacteria;p__Firmicutes_C;c__Negativicutes;o__Acidaminococcales;f__Acidaminococcaceae;g__Phascolarctobacterium_A;s__	p__Firmicutes_C	2.9e-24	82.1	297	1	[[4, 325]]	3.5e-24	GUT_GENOME112529	MAG	LeChatelierE_2013__MH0403__bin.36	50.08	101859
GUT_GENOME099111_00087	Peptidase T	d__Bacteria;p__Firmicutes_A;c__Clostridia;o__Oscillospirales;f__Oscillospiraceae;g__CAG-170;s__	p__Firmicutes_A	1.5e-07	27.3	233	1	[[12, 297]]	1.9e-07	GUT_GENOME099111	MAG	HeQ_2017__SZAXPI029560-51__bin.29	58.83	101632
GUT_GENOME137688_01334	Acetylornithine deacetylase	d__Bacteria;p__Firmicutes_A;c__Clostridia;o__Christensenellales;f__CAG-138;g__UBA5394;s__	p__Firmicutes_A	3.1e-22	74.9	231	1	[[29, 281]]	4.2e-22	GUT_GENOME137688	MAG	NielsenHB_2014__V1_UC26_4__bin.58	56.29	102204
GUT_GENOME137688_00187	Succinyl-diaminopimelate desuccinylase	d__Bacteria;p__Firmicutes_A;c__Clostridia;o__Christensenellales;f__CAG-138;g__UBA5394;s__	p__Firmicutes_A	4e-15	51.5	307	1	[[70, 380]]	5.4e-15	GUT_GENOME137688	MAG	NielsenHB_2014__V1_UC26_4__bin.58	56.29	102204
GUT_GENOME125418_01419	Carboxypeptidase G2	d__Bacteria;p__Proteobacteria;c__Gammaproteobacteria;o__Burkholderiales;f__Burkholderiaceae;g__Sutterella;s__	p__Proteobacteria	2.3e-41	138.3	376	1	[[3, 370]]	3.5e-41	GUT_GENOME125418	MAG	LiJ_2017__nHM512806__bin.14	56.77	102062
GUT_GENOME125418_01715	Peptidase T	d__Bacteria;p__Proteobacteria;c__Gammaproteobacteria;o__Burkholderiales;f__Burkholderiaceae;g__Sutterella;s__	p__Proteobacteria	5.6e-13	44.7	250	1	[[3, 330]]	7e-13	GUT_GENOME125418	MAG	LiJ_2017__nHM512806__bin.14	56.77	102062
GUT_GENOME019319_01516	putative succinyl-diaminopimelate desuccinylase	d__Bacteria;p__Actinobacteriota;c__Coriobacteriia;o__Coriobacteriales;f__Coriobacteriaceae;g__Collinsella;s__	p__Actinobacteriota	2.5e-11	39.4	326	1	[[8, 392]]	3.1e-11	GUT_GENOME019319	MAG	CM_madagascar__V53_02_1FE__bin.10	60.18	100641
GUT_GENOME122166_00272	putative succinyl-diaminopimelate desuccinylase	d__Bacteria;p__Actinobacteriota;c__Coriobacteriia;o__Coriobacteriales;f__Coriobacteriaceae;g__Collinsella;s__	p__Actinobacteriota	1.5e-10	36.9	302	1	[[9, 388]]	1.8e-10	GUT_GENOME122166	MAG	LiJ_2014__V1.UC38-4__bin.15	60.01	102028
GUT_GENOME124650_00429	putative succinyl-diaminopimelate desuccinylase	d__Bacteria;p__Actinobacteriota;c__Coriobacteriia;o__Coriobacteriales;f__Coriobacteriaceae;g__Collinsella;s__	p__Actinobacteriota	5.7e-10	34.8	265	1	[[9, 379]]	6.9e-10	GUT_GENOME124650	MAG	LiJ_2017__H3M517921__bin.32	60.23	102055
GUT_GENOME121628_00306	Peptidase T	d__Bacteria;p__Firmicutes_C;c__Negativicutes;o__Selenomonadales;f__Selenomonadaceae;g__Centipeda;s__Centipeda artemidis	p__Firmicutes_C	1.3e-20	70.1	275	1	[[1, 291]]	1.7e-20	GUT_GENOME121628	MAG	LiJ_2014__V1.FI24__bin.17	57.39	102022
GUT_GENOME126939_00054	putative succinyl-diaminopimelate desuccinylase	d__Bacteria;p__Actinobacteriota;c__Coriobacteriia;o__Coriobacteriales;f__Coriobacteriaceae;g__Collinsella;s__Collinsella sp002232035	p__Actinobacteriota	1.4e-10	36.9	320	1	[[8, 386]]	1.7e-10	GUT_GENOME126939	MAG	LiSS_2016__FAT_DON_19-22-0-0__bin.31	60.19	102083
GUT_GENOME125765_02470	putative hydrolase YxeP	d__Bacteria;p__Firmicutes_A;c__Clostridia;o__Oscillospirales;f__Oscillospiraceae;g__;s__	p__Firmicutes_A	8.3e-07	24.9	260	1	[[33, 311]]	1.2e-06	GUT_GENOME125765	MAG	LiSS_2016__FAT_008-22-0-0__bin.10	47.88	102067
GUT_GENOME172958_02043	Acetylornithine deacetylase	d__Bacteria;p__Firmicutes_A;c__Clostridia;o__Lachnospirales;f__Lachnospiraceae;g__Faecalicatena;s__	p__Firmicutes_A	1.3e-13	47.8	379	1	[[6, 379]]	2.1e-13	GUT_GENOME172958	MAG	SRR2047833_bin.6	47.45	102838
GUT_GENOME172958_00927	N-formyl-4-amino-5-aminomethyl-2-methylpyrimidine deformylase	d__Bacteria;p__Firmicutes_A;c__Clostridia;o__Lachnospirales;f__Lachnospiraceae;g__Faecalicatena;s__	p__Firmicutes_A	1.1e-11	41.5	267	1	[[2, 341]]	1.4e-11	GUT_GENOME172958	MAG	SRR2047833_bin.6	47.45	102838
GUT_GENOME172958_03290	putative hydrolase YxeP	d__Bacteria;p__Firmicutes_A;c__Clostridia;o__Lachnospirales;f__Lachnospiraceae;g__Faecalicatena;s__	p__Firmicutes_A	2.7e-06	23.7	255	1	[[34, 310]]	3.8e-06	GUT_GENOME172958	MAG	SRR2047833_bin.6	47.45	102838
GUT_GENOME123467_01245	putative succinyl-diaminopimelate desuccinylase	d__Bacteria;p__Actinobacteriota;c__Coriobacteriia;o__Coriobacteriales;f__Coriobacteriaceae;g__Collinsella;s__	p__Actinobacteriota	2.6e-10	36	267	1	[[9, 392]]	3.1e-10	GUT_GENOME123467	MAG	LiJ_2017__H2M415914__bin.9	60.55	102041
GUT_GENOME120773_00685	Carboxypeptidase G2	d__Bacteria;p__Proteobacteria;c__Gammaproteobacteria;o__Burkholderiales;f__Burkholderiaceae;g__Sutterella;s__	p__Proteobacteria	6.4e-39	130.4	376	1	[[3, 370]]	8.5e-39	GUT_GENOME120773	MAG	LiJ_2014__V1.FI01__bin.38	63.44	102003
GUT_GENOME120773_00370	N-acetyl-lysine deacetylase	d__Bacteria;p__Proteobacteria;c__Gammaproteobacteria;o__Burkholderiales;f__Burkholderiaceae;g__Sutterella;s__	p__Proteobacteria	3.3e-10	35.7	310	1	[[58, 410]]	4.3e-10	GUT_GENOME120773	MAG	LiJ_2014__V1.FI01__bin.38	63.44	102003
GUT_GENOME125939_01649	Acetylornithine deacetylase	d__Bacteria;p__Actinobacteriota;c__Coriobacteriia;o__Coriobacteriales;f__QAMH01;g__QAMH01;s__	p__Actinobacteriota	9.6e-18	60.6	285	1	[[0, 298]]	1.2e-17	GUT_GENOME125939	MAG	LiSS_2016__FAT_010-22-14-0__bin.60	59.23	102074
GUT_GENOME188619_00427	putative succinyl-diaminopimelate desuccinylase	d__Bacteria;p__Actinobacteriota;c__Coriobacteriia;o__Coriobacteriales;f__Coriobacteriaceae;g__Collinsella;s__	p__Actinobacteriota	9.5e-11	37.5	319	1	[[7, 386]]	1.2e-10	GUT_GENOME188619	MAG	SRR5056653_bin.24	59.88	102968
GUT_GENOME221922_00578	N-acetyl-lysine deacetylase	d__Bacteria;p__Firmicutes_A;c__Clostridia;o__Oscillospirales;f__Ruminococcaceae;g__;s__	p__Firmicutes_A	1.1e-12	42.9	247	1	[[40, 359]]	1.4e-12	GUT_GENOME221922	MAG	SRS1596854_3	59.33	103299
GUT_GENOME213516_01113	putative succinyl-diaminopimelate desuccinylase	d__Bacteria;p__Actinobacteriota;c__Coriobacteriia;o__Coriobacteriales;f__Coriobacteriaceae;g__Collinsella;s__	p__Actinobacteriota	5.9e-12	41.4	306	1	[[49, 395]]	7.7e-12	GUT_GENOME213516	MAG	SRS014235_27	60.26	103213
GUT_GENOME147602_00832	putative succinyl-diaminopimelate desuccinylase	d__Bacteria;p__Actinobacteriota;c__Coriobacteriia;o__Coriobacteriales;f__Coriobacteriaceae;g__Collinsella;s__Collinsella aerofaciens_A	p__Actinobacteriota	1.2e-10	37.2	269	1	[[10, 392]]	1.5e-10	GUT_GENOME147602	Isolate	PATRIC_74426_49	60.12	102539
GUT_GENOME147523_03261	Carboxypeptidase G2	d__Bacteria;p__Proteobacteria;c__Gammaproteobacteria;o__Enterobacterales;f__Vibrionaceae;g__Vibrio;s__Vibrio vulnificus	p__Proteobacteria	8.9e-55	183.9	377	1	[[1, 374]]	1.4e-54	GUT_GENOME147523	Isolate	PATRIC_676_29	46.65	102533
GUT_GENOME147523_00754	Carboxypeptidase G2	d__Bacteria;p__Proteobacteria;c__Gammaproteobacteria;o__Enterobacterales;f__Vibrionaceae;g__Vibrio;s__Vibrio vulnificus	p__Proteobacteria	2.9e-24	83.3	354	1	[[2, 363]]	3.7e-24	GUT_GENOME147523	Isolate	PATRIC_676_29	46.65	102533
GUT_GENOME121668_00770	putative hydrolase YxeP	d__Bacteria;p__Actinobacteriota;c__Coriobacteriia;o__Coriobacteriales;f__Eggerthellaceae;g__;s__	p__Actinobacteriota	4.7e-07	25.3	246	1	[[14, 346]]	6e-07	GUT_GENOME121668	MAG	LiJ_2014__V1.FI25__bin.11	64.85	102023
GUT_GENOME124631_01248	putative succinyl-diaminopimelate desuccinylase	d__Bacteria;p__Actinobacteriota;c__Coriobacteriia;o__Coriobacteriales;f__Coriobacteriaceae;g__Collinsella;s__	p__Actinobacteriota	3.9e-11	38.8	273	1	[[10, 392]]	4.7e-11	GUT_GENOME124631	MAG	LiJ_2017__H3M516909__bin.26	60.32	102054
GUT_GENOME122227_00054	putative hydrolase YxeP	d__Bacteria;p__Firmicutes_A;c__Clostridia;o__Lachnospirales;f__Lachnospiraceae;g__GCA-900066575;s__	p__Firmicutes_A	5.3e-08	28.7	240	1	[[47, 316]]	1.2e-07	GUT_GENOME122227	MAG	LiJ_2014__V1.UC40-1__bin.39	52	102029
GUT_GENOME125744_01306	putative succinyl-diaminopimelate desuccinylase	d__Bacteria;p__Actinobacteriota;c__Coriobacteriia;o__Coriobacteriales;f__Coriobacteriaceae;g__Collinsella;s__	p__Actinobacteriota	1.4e-10	36.9	302	1	[[9, 388]]	1.7e-10	GUT_GENOME125744	MAG	LiSS_2016__FAT_006-22-42-0__bin.54	60.45	102066
GUT_GENOME140233_01225	putative succinyl-diaminopimelate desuccinylase	d__Bacteria;p__Firmicutes_A;c__Clostridia;o__Lachnospirales;f__Lachnospiraceae;g__Eubacterium_I;s__Eubacterium_I ramulus_A	p__Firmicutes_A	9.9e-16	54.8	258	1	[[38, 345]]	1.3e-15	GUT_GENOME140233	Isolate	OM02-15	42.05	102278	0.182315	0.00711525
GUT_GENOME096302_01020	N-acetyl-lysine deacetylase	d__Bacteria;p__Firmicutes;c__Bacilli;o__Erysipelotrichales;f__Erysipelotrichaceae;g__Holdemania;s__Holdemania massiliensis	p__Firmicutes	8.7e-12	41.8	330	1	[[36, 376]]	1.1e-11	GUT_GENOME096302	Isolate	GCF_000327285	47.03	101430
GUT_GENOME096425_02796	Carboxypeptidase G2	d__Bacteria;p__Proteobacteria;c__Gammaproteobacteria;o__Enterobacterales;f__Enterobacteriaceae;g__Providencia;s__Providencia alcalifaciens	p__Proteobacteria	2.3e-63	211.9	371	1	[[3, 375]]	3.1e-63	GUT_GENOME096425	Isolate	GCF_000527295	41.73	101466
GUT_GENOME096472_01015	Carboxypeptidase G2	d__Bacteria;p__Firmicutes_I;c__Bacilli_A;o__Thermoactinomycetales;f__Thermoactinomycetaceae;g__Risungbinella;s__Risungbinella massiliensis	p__Firmicutes_I	2.5e-51	172.2	382	1	[[0, 374]]	2.8e-51	GUT_GENOME096472	Isolate	GCF_000942395	40.25	101488
GUT_GENOME096472_00825	Peptidase T	d__Bacteria;p__Firmicutes_I;c__Bacilli_A;o__Thermoactinomycetales;f__Thermoactinomycetaceae;g__Risungbinella;s__Risungbinella massiliensis	p__Firmicutes_I	5.9e-18	62.2	279	1	[[1, 327]]	7e-18	GUT_GENOME096472	Isolate	GCF_000942395	40.25	101488
GUT_GENOME096465_02747	Carboxypeptidase G2	d__Bacteria;p__Firmicutes;c__Bacilli;o__Bacillales_A;f__Planococcaceae;g__Planomicrobium;s__Planomicrobium massiliensis	p__Firmicutes	2.3e-42	142.6	389	1	[[0, 374]]	3.1e-42	GUT_GENOME096465	Isolate	GCF_000821325	45.95	101482
GUT_GENOME096465_02531	Succinyl-diaminopimelate desuccinylase	d__Bacteria;p__Firmicutes;c__Bacilli;o__Bacillales_A;f__Planococcaceae;g__Planomicrobium;s__Planomicrobium massiliensis	p__Firmicutes	1.1e-17	61.2	369	1	[[0, 347]]	2e-17	GUT_GENOME096465	Isolate	GCF_000821325	45.95	101482
GUT_GENOME096465_01809	Peptidase T	d__Bacteria;p__Firmicutes;c__Bacilli;o__Bacillales_A;f__Planococcaceae;g__Planomicrobium;s__Planomicrobium massiliensis	p__Firmicutes	7e-15	52	327	1	[[0, 328]]	8.9e-15	GUT_GENOME096465	Isolate	GCF_000821325	45.95	101482
GUT_GENOME096399_02574	putative succinyl-diaminopimelate desuccinylase	d__Bacteria;p__Firmicutes_A;c__Clostridia;o__Oscillospirales;f__Ruminococcaceae;g__Bittarella;s__Bittarella massiliensis	p__Firmicutes_A	4.8e-15	52.3	262	1	[[24, 316]]	7.5e-15	GUT_GENOME096399	Isolate	GCF_000466605	61.65	101454
GUT_GENOME096399_00460	N-acetyl-lysine deacetylase	d__Bacteria;p__Firmicutes_A;c__Clostridia;o__Oscillospirales;f__Ruminococcaceae;g__Bittarella;s__Bittarella massiliensis	p__Firmicutes_A	7.4e-11	38.5	335	2	[[6, 47], [56, 379]]	1.6e-10	GUT_GENOME096399	Isolate	GCF_000466605	61.65	101454
GUT_GENOME096399_00319	putative hydrolase YxeP	d__Bacteria;p__Firmicutes_A;c__Clostridia;o__Oscillospirales;f__Ruminococcaceae;g__Bittarella;s__Bittarella massiliensis	p__Firmicutes_A	5.7e-06	22.4	267	1	[[39, 371]]	6.7e-06	GUT_GENOME096399	Isolate	GCF_000466605	61.65	101454
GUT_GENOME127139_01317	Peptidase T	d__Bacteria;p__Firmicutes_A;c__Clostridia;o__Oscillospirales;f__Oscillospiraceae;g__CAG-170;s__	p__Firmicutes_A	1.2e-08	31	283	2	[[20, 269], [250, 302]]	3.5e-08	GUT_GENOME127139	MAG	LiuW_2016__SRR3992961__bin.56	58.66	102085	0.182315	0.0327145
GUT_GENOME124455_00483	Peptidase T	d__Bacteria;p__Firmicutes_C;c__Negativicutes;o__Veillonellales;f__Dialisteraceae;g__UBA1822;s__	p__Firmicutes_C	3.9e-19	64.5	249	1	[[3, 275]]	5.8e-19	GUT_GENOME124455	MAG	LiJ_2017__H3M516105__bin.26	54.15	102053
GUT_GENOME124455_01055	Peptidase T	d__Bacteria;p__Firmicutes_C;c__Negativicutes;o__Veillonellales;f__Dialisteraceae;g__UBA1822;s__	p__Firmicutes_C	2e-16	55.6	279	1	[[0, 312]]	2.5e-16	GUT_GENOME124455	MAG	LiJ_2017__H3M516105__bin.26	54.15	102053
GUT_GENOME124777_01796	Succinyl-diaminopimelate desuccinylase	d__Bacteria;p__Firmicutes_A;c__Clostridia;o__Oscillospirales;f__Oscillospiraceae;g__Oscillibacter;s__Oscillibacter sp001916835	p__Firmicutes_A	1.5e-11	40.2	228	1	[[7, 355]]	1.9e-11	GUT_GENOME124777	MAG	LiJ_2017__H3M615747__bin.31	58.63	102057	29.7174	0.0100735
GUT_GENOME125783_01557	putative succinyl-diaminopimelate desuccinylase	d__Bacteria;p__Actinobacteriota;c__Coriobacteriia;o__Coriobacteriales;f__Coriobacteriaceae;g__Collinsella;s__	p__Actinobacteriota	3.9e-10	35.5	318	1	[[8, 390]]	4.8e-10	GUT_GENOME125783	MAG	LiSS_2016__FAT_008-22-0-0__bin.3	60.06	102069
GUT_GENOME121220_02104	N-acetyl-lysine deacetylase	d__Bacteria;p__Bacteroidota;c__Bacteroidia;o__Bacteroidales;f__Rikenellaceae;g__Alistipes;s__	p__Bacteroidota	2.1e-09	33.3	241	1	[[12, 299]]	2.8e-09	GUT_GENOME121220	MAG	LiJ_2014__V1.FI13__bin.48	62.01	102007	4.37557	0.0104466
GUT_GENOME009480_01559	N-acetyl-lysine deacetylase	d__Bacteria;p__Bacteroidota;c__Bacteroidia;o__Bacteroidales;f__Rikenellaceae;g__Alistipes;s__	p__Bacteroidota	4e-15	52.2	276	1	[[20, 307]]	5.4e-15	GUT_GENOME009480	MAG	Bengtsson-PalmeJ_2015__TRAVELRES45__bin.71	56.92	100414	1.00273	0.00663767
GUT_GENOME103727_00976	putative succinyl-diaminopimelate desuccinylase	d__Bacteria;p__Firmicutes;c__Bacilli;o__Lactobacillales;f__Enterococcaceae;g__Enterococcus_A;s__Enterococcus_A raffinosus	p__Firmicutes	5.1e-17	59.3	259	1	[[30, 317]]	7e-17	GUT_GENOME103727	Isolate	IMG_2554235108	39.44	101696
GUT_GENOME175146_00904	putative succinyl-diaminopimelate desuccinylase	d__Bacteria;p__Actinobacteriota;c__Coriobacteriia;o__Coriobacteriales;f__Coriobacteriaceae;g__Collinsella;s__	p__Actinobacteriota	2.9e-12	42.4	320	1	[[8, 388]]	3.6e-12	GUT_GENOME175146	MAG	SRR2912789_bin.22	59.93	102855
GUT_GENOME176629_00553	Acetylornithine deacetylase	d__Bacteria;p__Proteobacteria;c__Gammaproteobacteria;o__Enterobacterales;f__Enterobacteriaceae;g__Pantoea;s__Pantoea sp002920175	p__Proteobacteria	5.1e-12	42.9	237	1	[[23, 291]]	8e-12	GUT_GENOME176629	MAG	SRR3131812_bin.3	58.83	102889
GUT_GENOME176629_02237	N-acetyldiaminopimelate deacetylase	d__Bacteria;p__Proteobacteria;c__Gammaproteobacteria;o__Enterobacterales;f__Enterobacteriaceae;g__Pantoea;s__Pantoea sp002920175	p__Proteobacteria	1.5e-09	34.7	328	1	[[0, 341]]	2e-09	GUT_GENOME176629	MAG	SRR3131812_bin.3	58.83	102889
GUT_GENOME176629_03677	putative hydrolase YxeP	d__Bacteria;p__Proteobacteria;c__Gammaproteobacteria;o__Enterobacterales;f__Enterobacteriaceae;g__Pantoea;s__Pantoea sp002920175	p__Proteobacteria	1.9e-06	24.5	236	1	[[86, 360]]	2.5e-06	GUT_GENOME176629	MAG	SRR3131812_bin.3	58.83	102889
GUT_GENOME175554_00901	Succinyl-diaminopimelate desuccinylase	d__Bacteria;p__Bacteroidota;c__Bacteroidia;o__Bacteroidales;f__Rikenellaceae;g__Alistipes;s__	p__Bacteroidota	4.8e-09	31.7	236	1	[[8, 299]]	6.9e-09	GUT_GENOME175554	MAG	SRR2992882_bin.74	62.61	102867	0.0911577	0.00564488
GUT_GENOME218496_02226	Acetylornithine deacetylase	d__Bacteria;p__Actinobacteriota;c__Coriobacteriia;o__Coriobacteriales;f__Coriobacteriaceae;g__Collinsella;s__	p__Actinobacteriota	3.1e-10	36.1	301	1	[[9, 389]]	4.1e-10	GUT_GENOME218496	MAG	SRS1170780_21	59.58	103272
GUT_GENOME218039_01327	putative succinyl-diaminopimelate desuccinylase	d__Bacteria;p__Actinobacteriota;c__Coriobacteriia;o__Coriobacteriales;f__Coriobacteriaceae;g__Collinsella;s__	p__Actinobacteriota	4.8e-10	35.3	319	1	[[8, 382]]	5.9e-10	GUT_GENOME218039	MAG	SRS1170706_17	60.02	103261
GUT_GENOME215615_01002	putative succinyl-diaminopimelate desuccinylase	d__Bacteria;p__Actinobacteriota;c__Coriobacteriia;o__Coriobacteriales;f__Coriobacteriaceae;g__Collinsella;s__	p__Actinobacteriota	2.9e-12	42.3	321	1	[[8, 392]]	3.6e-12	GUT_GENOME215615	MAG	SRS045528_29	60.33	103229
GUT_GENOME220136_00924	Carboxypeptidase G2	d__Bacteria;p__Proteobacteria;c__Gammaproteobacteria;o__Burkholderiales;f__Burkholderiaceae;g__Duodenibacillus;s__	p__Proteobacteria	1.4e-44	149.1	386	1	[[4, 386]]	1.7e-44	GUT_GENOME220136	MAG	SRS1596782_93	57.2	103288	0.546946	0.00735882
GUT_GENOME220136_01107	Carboxypeptidase G2	d__Bacteria;p__Proteobacteria;c__Gammaproteobacteria;o__Burkholderiales;f__Burkholderiaceae;g__Duodenibacillus;s__	p__Proteobacteria	1.4e-38	129.4	376	1	[[1, 369]]	1.8e-38	GUT_GENOME220136	MAG	SRS1596782_93	57.2	103288	0.546946	0.00735882
GUT_GENOME220136_01493	Succinyl-diaminopimelate desuccinylase	d__Bacteria;p__Proteobacteria;c__Gammaproteobacteria;o__Burkholderiales;f__Burkholderiaceae;g__Duodenibacillus;s__	p__Proteobacteria	2.5e-21	72.5	275	1	[[11, 310]]	3.1e-21	GUT_GENOME220136	MAG	SRS1596782_93	57.2	103288	0.546946	0.00735882
GUT_GENOME220136_00814	N-acetyl-lysine deacetylase	d__Bacteria;p__Proteobacteria;c__Gammaproteobacteria;o__Burkholderiales;f__Burkholderiaceae;g__Duodenibacillus;s__	p__Proteobacteria	4.6e-08	28.8	234	1	[[51, 313]]	6.6e-08	GUT_GENOME220136	MAG	SRS1596782_93	57.2	103288	0.546946	0.00735882
GUT_GENOME218153_01452	putative succinyl-diaminopimelate desuccinylase	d__Bacteria;p__Actinobacteriota;c__Coriobacteriia;o__Coriobacteriales;f__Coriobacteriaceae;g__Collinsella;s__	p__Actinobacteriota	2.8e-11	39.2	315	1	[[9, 392]]	3.6e-11	GUT_GENOME218153	MAG	SRS1170732_10	60.26	103266
GUT_GENOME120894_00126	putative hydrolase YxeP	d__Bacteria;p__Firmicutes_A;c__Clostridia;o__Oscillospirales;f__;g__;s__	p__Firmicutes_A	7.5e-06	21.1	239	2	[[54, 275], [269, 330]]	4.7e-05	GUT_GENOME120894	MAG	LiJ_2014__V1.FI04__bin.58	58.33	102005
GUT_GENOME125875_00035	N-acetyl-lysine deacetylase	d__Bacteria;p__Firmicutes_A;c__Clostridia;o__Christensenellales;f__CAG-74;g__;s__	p__Firmicutes_A	2.9e-12	43	251	1	[[66, 379]]	3.6e-12	GUT_GENOME125875	MAG	LiSS_2016__FAT_008-22-84-0__bin.15	59	102072	6.74567	0.00750783
GUT_GENOME121425_00326	Acetylornithine deacetylase	d__Bacteria;p__Firmicutes_A;c__Clostridia;o__Christensenellales;f__CAG-138;g__UBA5394;s__UBA5394 sp003150565	p__Firmicutes_A	5.3e-21	71.6	239	1	[[30, 285]]	6.9e-21	GUT_GENOME121425	MAG	LiJ_2014__V1.FI17__bin.83	58.33	102016	0.364631	0.00823271
GUT_GENOME121425_00845	N-acetyl-lysine deacetylase	d__Bacteria;p__Firmicutes_A;c__Clostridia;o__Christensenellales;f__CAG-138;g__UBA5394;s__UBA5394 sp003150565	p__Firmicutes_A	3.3e-14	49.2	306	1	[[70, 379]]	4.5e-14	GUT_GENOME121425	MAG	LiJ_2014__V1.FI17__bin.83	58.33	102016	0.364631	0.00823271
GUT_GENOME121425_01709	Peptidase T	d__Bacteria;p__Firmicutes_A;c__Clostridia;o__Christensenellales;f__CAG-138;g__UBA5394;s__UBA5394 sp003150565	p__Firmicutes_A	8.8e-10	34.6	280	1	[[22, 348]]	1.1e-09	GUT_GENOME121425	MAG	LiJ_2014__V1.FI17__bin.83	58.33	102016	0.364631	0.00823271
GUT_GENOME127408_00698	Hippurate hydrolase	d__Bacteria;p__Firmicutes_A;c__Clostridia;o__Oscillospirales;f__Ruminococcaceae;g__Hydrogenoanaerobacterium;s__	p__Firmicutes_A	1.6e-06	22.8	271	1	[[36, 359]]	2.2e-06	GUT_GENOME127408	MAG	LiuW_2016__SRR3992973__bin.65	61.48	102088
GUT_GENOME127497_00521	Peptidase T	d__Bacteria;p__Firmicutes_A;c__Clostridia;o__Oscillospirales;f__Butyricicoccaceae;g__UBA4644;s__	p__Firmicutes_A	2.5e-20	69	291	1	[[1, 342]]	2.8e-20	GUT_GENOME127497	MAG	LiuW_2016__SRR3992978__bin.76	62.61	102091
GUT_GENOME251944_00319	putative hydrolase YxeP	d__Bacteria;p__Firmicutes_A;c__Clostridia;o__Oscillospirales;f__CAG-272;g__UBA11512;s__UBA11512 sp003522145	p__Firmicutes_A	1.1e-06	24.1	241	1	[[23, 294]]	2.1e-06	GUT_GENOME251944	MAG	XieH_2016__YSZC12003_35561__bin.73	51.18	103966	0.638104	0.00658582
GUT_GENOME251699_01100	N-acetyl-lysine deacetylase	d__Bacteria;p__Firmicutes_A;c__Clostridia;o__Lachnospirales;f__Lachnospiraceae;g__CAG-303;s__	p__Firmicutes_A	8.2e-11	37.9	310	1	[[56, 381]]	9.8e-11	GUT_GENOME251699	MAG	XieH_2016__YSZC12003_35549__bin.100	33.94	103954	0.273473	0.111119
GUT_GENOME250693_01530	putative succinyl-diaminopimelate desuccinylase	d__Bacteria;p__Actinobacteriota;c__Coriobacteriia;o__Coriobacteriales;f__Coriobacteriaceae;g__Collinsella;s__	p__Actinobacteriota	3.6e-10	35.6	305	1	[[9, 390]]	4.4e-10	GUT_GENOME250693	MAG	WenC_2017__RA118__bin.21	60.24	103923
GUT_GENOME151535_00301	putative succinyl-diaminopimelate desuccinylase	d__Bacteria;p__Actinobacteriota;c__Coriobacteriia;o__Coriobacteriales;f__Coriobacteriaceae;g__Collinsella;s__	p__Actinobacteriota	2.1e-10	36.3	306	1	[[9, 383]]	2.6e-10	GUT_GENOME151535	MAG	QinJ_2012__T2D-018__bin.16	59.98	102576
GUT_GENOME147776_02226	Acetylornithine deacetylase	d__Bacteria;p__Firmicutes_A;c__Clostridia;o__Oscillospirales;f__Ruminococcaceae;g__Neobitarella;s__Neobitarella massiliensis	p__Firmicutes_A	7.9e-11	38.4	234	1	[[1, 255]]	1.1e-10	GUT_GENOME147776	Isolate	PATRIC_905011_3	58.26	102546
GUT_GENOME151017_01976	Carboxypeptidase G2	d__Bacteria;p__Fusobacteriota;c__Fusobacteriia;o__Fusobacteriales;f__Fusobacteriaceae;g__Fusobacterium_A;s__	p__Fusobacteriota	5.2e-56	187.7	381	1	[[2, 372]]	6.3e-56	GUT_GENOME151017	MAG	QinJ_2012__NOM004__bin.19	30.47	102574
GUT_GENOME151017_02624	Carboxypeptidase G2	d__Bacteria;p__Fusobacteriota;c__Fusobacteriia;o__Fusobacteriales;f__Fusobacteriaceae;g__Fusobacterium_A;s__	p__Fusobacteriota	9.5e-42	140.7	377	1	[[0, 369]]	1.6e-41	GUT_GENOME151017	MAG	QinJ_2012__NOM004__bin.19	30.47	102574
GUT_GENOME151017_02441	Carboxypeptidase G2	d__Bacteria;p__Fusobacteriota;c__Fusobacteriia;o__Fusobacteriales;f__Fusobacteriaceae;g__Fusobacterium_A;s__	p__Fusobacteriota	8.7e-33	111.1	395	1	[[2, 391]]	1.1e-32	GUT_GENOME151017	MAG	QinJ_2012__NOM004__bin.19	30.47	102574
GUT_GENOME151017_01622	Peptidase T	d__Bacteria;p__Fusobacteriota;c__Fusobacteriia;o__Fusobacteriales;f__Fusobacteriaceae;g__Fusobacterium_A;s__	p__Fusobacteriota	7.6e-10	35.5	323	1	[[7, 362]]	9.8e-10	GUT_GENOME151017	MAG	QinJ_2012__NOM004__bin.19	30.47	102574
GUT_GENOME151017_03070	putative hydrolase YxeP	d__Bacteria;p__Fusobacteriota;c__Fusobacteriia;o__Fusobacteriales;f__Fusobacteriaceae;g__Fusobacterium_A;s__	p__Fusobacteriota	1.1e-06	25.1	263	1	[[58, 357]]	1.8e-06	GUT_GENOME151017	MAG	QinJ_2012__NOM004__bin.19	30.47	102574
GUT_GENOME143752_01819	Carboxypeptidase G2	d__Bacteria;p__Proteobacteria;c__Gammaproteobacteria;o__Enterobacterales;f__Enterobacteriaceae;g__Enterobacter;s__Enterobacter ludwigii	p__Proteobacteria	4e-56	188.3	377	1	[[1, 370]]	5.1e-56	GUT_GENOME143752	Isolate	PATRIC_550_1589	54.62	102503
GUT_GENOME258044_01425	Peptidase T	d__Bacteria;p__Firmicutes_C;c__Negativicutes;o__Veillonellales;f__Dialisteraceae;g__Dialister;s__Dialister invisus	p__Firmicutes_C	2.2e-24	82.3	268	1	[[2, 273]]	3e-24	GUT_GENOME258044	MAG	XieH_2016__YSZC12003_37207R1__bin.54	45	104158	30.5378	0.0195766
GUT_GENOME257066_00821	Carboxypeptidase G2	d__Bacteria;p__Firmicutes_A;c__Clostridia;o__Oscillospirales;f__CAG-382;g__UCG-010;s__	p__Firmicutes_A	6.1e-29	97.7	368	1	[[2, 385]]	8e-29	GUT_GENOME257066	MAG	XieH_2016__YSZC12003_37171__bin.68	55.65	104125	0.182315	0.00339829
GUT_GENOME257708_00965	putative succinyl-diaminopimelate desuccinylase	d__Bacteria;p__Actinobacteriota;c__Coriobacteriia;o__Coriobacteriales;f__Coriobacteriaceae;g__Collinsella;s__	p__Actinobacteriota	2.8e-10	35.9	301	1	[[9, 389]]	3.4e-10	GUT_GENOME257708	MAG	XieH_2016__YSZC12003_37197R1__bin.74	60.06	104152
GUT_GENOME258542_00588	Carboxypeptidase G2	d__Bacteria;p__Firmicutes_A;c__Clostridia;o__Peptostreptococcales;f__Anaerovoracaceae;g__CAG-145;s__	p__Firmicutes_A	1e-49	165.9	382	1	[[0, 384]]	1.3e-49	GUT_GENOME258542	MAG	XieH_2016__YSZC12003_37255__bin.34	47.65	104173
GUT_GENOME258542_01538	Succinyl-diaminopimelate desuccinylase	d__Bacteria;p__Firmicutes_A;c__Clostridia;o__Peptostreptococcales;f__Anaerovoracaceae;g__CAG-145;s__	p__Firmicutes_A	1.3e-07	27.2	230	1	[[1, 243]]	1.9e-07	GUT_GENOME258542	MAG	XieH_2016__YSZC12003_37255__bin.34	47.65	104173
GUT_GENOME096431_00291	Peptidase T	d__Bacteria;p__Firmicutes;c__Bacilli;o__Bacillales;f__Bacillaceae_A;g__Bacillus_W;s__Bacillus_W jeddahensis	p__Firmicutes	1.1e-14	51.8	274	1	[[1, 333]]	1.4e-14	GUT_GENOME096431	Isolate	GCF_000612625	39.42	101469
GUT_GENOME096431_00392	Acetylornithine deacetylase	d__Bacteria;p__Firmicutes;c__Bacilli;o__Bacillales;f__Bacillaceae_A;g__Bacillus_W;s__Bacillus_W jeddahensis	p__Firmicutes	4.7e-06	23.4	261	1	[[6, 317]]	6.7e-06	GUT_GENOME096431	Isolate	GCF_000612625	39.42	101469
GUT_GENOME096459_00279	Succinyl-diaminopimelate desuccinylase	d__Bacteria;p__Actinobacteriota;c__Actinobacteria;o__Actinomycetales;f__Actinomycetaceae;g__Pauljensenia;s__Pauljensenia polynesiensis	p__Actinobacteriota	3.8e-42	141.5	379	1	[[4, 377]]	6.3e-42	GUT_GENOME096459	Isolate	GCF_000820725	70.75	101480
GUT_GENOME096459_02342	Succinyl-diaminopimelate desuccinylase	d__Bacteria;p__Actinobacteriota;c__Actinobacteria;o__Actinomycetales;f__Actinomycetaceae;g__Pauljensenia;s__Pauljensenia polynesiensis	p__Actinobacteriota	6.2e-09	32	234	1	[[1, 253]]	8.4e-09	GUT_GENOME096459	Isolate	GCF_000820725	70.75	101480
GUT_GENOME096293_02502	Succinyl-diaminopimelate desuccinylase	d__Bacteria;p__Firmicutes;c__Bacilli;o__Erysipelotrichales;f__Erysipelotrichaceae;g__Dielma;s__Dielma fastidiosa	p__Firmicutes	5.2e-14	49.2	324	1	[[4, 368]]	5.8e-14	GUT_GENOME096293	Isolate	GCF_000313565	39.97	101421	0.273473	0.00695649
GUT_GENOME096293_02891	Succinyl-diaminopimelate desuccinylase	d__Bacteria;p__Firmicutes;c__Bacilli;o__Erysipelotrichales;f__Erysipelotrichaceae;g__Dielma;s__Dielma fastidiosa	p__Firmicutes	5.3e-07	26.1	300	1	[[43, 372]]	6.6e-07	GUT_GENOME096293	Isolate	GCF_000313565	39.97	101421	0.273473	0.00695649
GUT_GENOME096485_02971	Acetylornithine deacetylase	d__Bacteria;p__Firmicutes_A;c__Clostridia;o__Lachnospirales;f__Lachnospiraceae;g__Clostridium_M;s__Clostridium_M bolteae	p__Firmicutes_A	8.3e-09	32.8	258	1	[[100, 407]]	1.3e-08	GUT_GENOME096485	Isolate	GCF_001078425	49.05	101493	0.455789	0.0120406
GUT_GENOME091104_01279	N-formyl-4-amino-5-aminomethyl-2-methylpyrimidine deformylase	d__Bacteria;p__Firmicutes_A;c__Clostridia;o__Lachnospirales;f__Lachnospiraceae;g__;s__	p__Firmicutes_A	5.6e-08	28.6	235	1	[[0, 250]]	7.2e-08	GUT_GENOME091104	MAG	FengQ_2015__SID31137__bin.63	49.21	101187
GUT_GENOME082924_00023	putative succinyl-diaminopimelate desuccinylase	d__Bacteria;p__Actinobacteriota;c__Coriobacteriia;o__Coriobacteriales;f__Coriobacteriaceae;g__Collinsella;s__	p__Actinobacteriota	3.2e-10	35.7	318	1	[[8, 390]]	3.8e-10	GUT_GENOME082924	MAG	ERS537268_30	59.9	101114
GUT_GENOME084181_00256	putative succinyl-diaminopimelate desuccinylase	d__Bacteria;p__Actinobacteriota;c__Coriobacteriia;o__Coriobacteriales;f__Coriobacteriaceae;g__Collinsella;s__	p__Actinobacteriota	3.4e-12	42.2	329	1	[[8, 392]]	4.4e-12	GUT_GENOME084181	MAG	ERS537311_59	59.92	101126
GUT_GENOME083570_00709	putative succinyl-diaminopimelate desuccinylase	d__Bacteria;p__Actinobacteriota;c__Coriobacteriia;o__Coriobacteriales;f__Coriobacteriaceae;g__Collinsella;s__	p__Actinobacteriota	1.1e-10	37.2	309	1	[[9, 393]]	1.4e-10	GUT_GENOME083570	MAG	ERS537290_54	59.68	101122
GUT_GENOME084337_01308	Carboxypeptidase G2	d__Bacteria;p__Firmicutes_C;c__Negativicutes;o__Acidaminococcales;f__Acidaminococcaceae;g__Phascolarctobacterium_A;s__	p__Firmicutes_C	1.1e-46	155.8	384	1	[[2, 379]]	1.7e-46	GUT_GENOME084337	MAG	ERS537316_15	44.23	101128
GUT_GENOME084337_00726	Carboxypeptidase G2	d__Bacteria;p__Firmicutes_C;c__Negativicutes;o__Acidaminococcales;f__Acidaminococcaceae;g__Phascolarctobacterium_A;s__	p__Firmicutes_C	1.9e-41	138.6	392	1	[[0, 390]]	2.2e-41	GUT_GENOME084337	MAG	ERS537316_15	44.23	101128
GUT_GENOME084337_01200	Carboxypeptidase G2	d__Bacteria;p__Firmicutes_C;c__Negativicutes;o__Acidaminococcales;f__Acidaminococcaceae;g__Phascolarctobacterium_A;s__	p__Firmicutes_C	4.4e-31	104.4	288	2	[[0, 168], [170, 324]]	6.2e-24	GUT_GENOME084337	MAG	ERS537316_15	44.23	101128
GUT_GENOME084337_01087	Peptidase T	d__Bacteria;p__Firmicutes_C;c__Negativicutes;o__Acidaminococcales;f__Acidaminococcaceae;g__Phascolarctobacterium_A;s__	p__Firmicutes_C	2.1e-26	89	302	1	[[2, 342]]	2.5e-26	GUT_GENOME084337	MAG	ERS537316_15	44.23	101128
GUT_GENOME101256_00003	N-acetyl-lysine deacetylase	d__Bacteria;p__Firmicutes_A;c__Clostridia;o__Christensenellales;f__CAG-74;g__;s__	p__Firmicutes_A	6.6e-13	45	314	1	[[72, 383]]	8.6e-13	GUT_GENOME101256	MAG	HMP_2012__SRS016095__bin.27	54.94	101658	0.0911577	0.0102027
GUT_GENOME098572_01638	Carboxypeptidase G2	d__Bacteria;p__Firmicutes_A;c__Clostridia;o__Lachnospirales;f__Lachnospiraceae;g__Clostridium_Q;s__	p__Firmicutes_A	6.5e-54	181.1	384	1	[[2, 377]]	8.6e-54	GUT_GENOME098572	MAG	HeQ_2017__SZAXPI029494-94__bin.5	49.2	101617
GUT_GENOME098572_00740	Carboxypeptidase G2	d__Bacteria;p__Firmicutes_A;c__Clostridia;o__Lachnospirales;f__Lachnospiraceae;g__Clostridium_Q;s__	p__Firmicutes_A	3.3e-49	165.6	380	1	[[3, 377]]	5.4e-49	GUT_GENOME098572	MAG	HeQ_2017__SZAXPI029494-94__bin.5	49.2	101617
GUT_GENOME098572_03054	Carboxypeptidase G2	d__Bacteria;p__Firmicutes_A;c__Clostridia;o__Lachnospirales;f__Lachnospiraceae;g__Clostridium_Q;s__	p__Firmicutes_A	9.3e-43	144.4	311	1	[[4, 391]]	1.2e-42	GUT_GENOME098572	MAG	HeQ_2017__SZAXPI029494-94__bin.5	49.2	101617
GUT_GENOME098572_01671	Peptidase T	d__Bacteria;p__Firmicutes_A;c__Clostridia;o__Lachnospirales;f__Lachnospiraceae;g__Clostridium_Q;s__	p__Firmicutes_A	3.3e-16	56.9	281	1	[[4, 276]]	4.8e-16	GUT_GENOME098572	MAG	HeQ_2017__SZAXPI029494-94__bin.5	49.2	101617
GUT_GENOME100011_01007	putative succinyl-diaminopimelate desuccinylase	d__Bacteria;p__Actinobacteriota;c__Coriobacteriia;o__Coriobacteriales;f__Coriobacteriaceae;g__Collinsella;s__Collinsella sp002232035	p__Actinobacteriota	5.2e-10	34.7	305	1	[[9, 390]]	6.6e-10	GUT_GENOME100011	MAG	HeQ_2017__SZAXPI029593-133__bin.52	60.28	101636
GUT_GENOME258728_01068	putative succinyl-diaminopimelate desuccinylase	d__Bacteria;p__Actinobacteriota;c__Coriobacteriia;o__Coriobacteriales;f__Coriobacteriaceae;g__Collinsella;s__Collinsella sp002232035	p__Actinobacteriota	1.3e-10	37	321	1	[[8, 386]]	1.6e-10	GUT_GENOME258728	MAG	XieH_2016__YSZC12003_37269__bin.75	60.13	104181
GUT_GENOME257007_01052	Carboxypeptidase G2	d__Bacteria;p__Firmicutes_A;c__Clostridia;o__Oscillospirales;f__Butyricicoccaceae;g__;s__	p__Firmicutes_A	3.5e-51	171.1	328	1	[[7, 378]]	4.4e-51	GUT_GENOME257007	MAG	XieH_2016__YSZC12003_37138__bin.48	58.27	104122
GUT_GENOME257007_01036	Carboxypeptidase G2	d__Bacteria;p__Firmicutes_A;c__Clostridia;o__Oscillospirales;f__Butyricicoccaceae;g__;s__	p__Firmicutes_A	2.5e-36	122.1	308	1	[[2, 388]]	3.3e-36	GUT_GENOME257007	MAG	XieH_2016__YSZC12003_37138__bin.48	58.27	104122
GUT_GENOME257007_01517	putative succinyl-diaminopimelate desuccinylase	d__Bacteria;p__Firmicutes_A;c__Clostridia;o__Oscillospirales;f__Butyricicoccaceae;g__;s__	p__Firmicutes_A	1.4e-09	33.9	235	1	[[25, 306]]	2.3e-09	GUT_GENOME257007	MAG	XieH_2016__YSZC12003_37138__bin.48	58.27	104122
GUT_GENOME257007_00116	N-acetyl-lysine deacetylase	d__Bacteria;p__Firmicutes_A;c__Clostridia;o__Oscillospirales;f__Butyricicoccaceae;g__;s__	p__Firmicutes_A	3.1e-09	32.8	232	1	[[42, 292]]	4.3e-09	GUT_GENOME257007	MAG	XieH_2016__YSZC12003_37138__bin.48	58.27	104122
GUT_GENOME257007_00383	p-aminobenzoyl-glutamate hydrolase subunit B	d__Bacteria;p__Firmicutes_A;c__Clostridia;o__Oscillospirales;f__Butyricicoccaceae;g__;s__	p__Firmicutes_A	5.6e-06	22.1	228	2	[[77, 286], [264, 359]]	0.00013	GUT_GENOME257007	MAG	XieH_2016__YSZC12003_37138__bin.48	58.27	104122
GUT_GENOME256562_01512	Carboxypeptidase G2	d__Bacteria;p__Firmicutes_C;c__Negativicutes;o__Veillonellales;f__Dialisteraceae;g__UBA1822;s__	p__Firmicutes_C	1.9e-51	171.5	393	1	[[1, 383]]	2.2e-51	GUT_GENOME256562	MAG	XieH_2016__YSZC12003_37102__bin.5	61.04	104110	0.273473	0.0248282
GUT_GENOME256562_01511	Carboxypeptidase G2	d__Bacteria;p__Firmicutes_C;c__Negativicutes;o__Veillonellales;f__Dialisteraceae;g__UBA1822;s__	p__Firmicutes_C	7.9e-50	166.1	385	1	[[2, 388]]	1e-49	GUT_GENOME256562	MAG	XieH_2016__YSZC12003_37102__bin.5	61.04	104110	0.273473	0.0248282
GUT_GENOME256562_00684	Peptidase T	d__Bacteria;p__Firmicutes_C;c__Negativicutes;o__Veillonellales;f__Dialisteraceae;g__UBA1822;s__	p__Firmicutes_C	3.2e-20	68.5	239	1	[[3, 275]]	4.3e-20	GUT_GENOME256562	MAG	XieH_2016__YSZC12003_37102__bin.5	61.04	104110	0.273473	0.0248282
GUT_GENOME256562_00477	Peptidase T	d__Bacteria;p__Firmicutes_C;c__Negativicutes;o__Veillonellales;f__Dialisteraceae;g__UBA1822;s__	p__Firmicutes_C	9.4e-18	60.4	375	1	[[0, 369]]	1.2e-17	GUT_GENOME256562	MAG	XieH_2016__YSZC12003_37102__bin.5	61.04	104110	0.273473	0.0248282
GUT_GENOME121397_00413	Carboxypeptidase G2	d__Bacteria;p__Firmicutes_A;c__Clostridia;o__Peptostreptococcales;f__Anaerovoracaceae;g__CAG-145;s__	p__Firmicutes_A	2.6e-50	167.9	374	1	[[5, 367]]	4e-50	GUT_GENOME121397	MAG	LiJ_2014__V1.FI17__bin.41	46.43	102012	0.0911577	0.0096018
GUT_GENOME125603_01173	putative succinyl-diaminopimelate desuccinylase	d__Bacteria;p__Actinobacteriota;c__Coriobacteriia;o__Coriobacteriales;f__Coriobacteriaceae;g__Collinsella;s__Collinsella sp002232035	p__Actinobacteriota	1.3e-11	40.1	332	1	[[8, 393]]	1.6e-11	GUT_GENOME125603	MAG	LiJ_2017__nHM612836__bin.1	60.92	102065
GUT_GENOME123846_00108	putative succinyl-diaminopimelate desuccinylase	d__Bacteria;p__Firmicutes;c__Bacilli;o__Lactobacillales;f__Lactobacillaceae;g__Lactobacillus_G;s__Lactobacillus_G sanfranciscensis	p__Firmicutes	8.1e-21	70.1	253	1	[[32, 334]]	1e-20	GUT_GENOME123846	MAG	LiJ_2017__H2M515822__bin.31	34.69	102044
GUT_GENOME123846_00500	putative succinyl-diaminopimelate desuccinylase	d__Bacteria;p__Firmicutes;c__Bacilli;o__Lactobacillales;f__Lactobacillaceae;g__Lactobacillus_G;s__Lactobacillus_G sanfranciscensis	p__Firmicutes	1.5e-12	42.9	295	1	[[1, 341]]	1.9e-12	GUT_GENOME123846	MAG	LiJ_2017__H2M515822__bin.31	34.69	102044
GUT_GENOME123317_01481	Carboxypeptidase G2	d__Bacteria;p__Firmicutes_A;c__Clostridia;o__Oscillospirales;f__Ruminococcaceae;g__;s__	p__Firmicutes_A	9.7e-30	99.9	375	1	[[2, 385]]	1.3e-29	GUT_GENOME123317	MAG	LiJ_2017__H2F514923__bin.19	60.19	102039
GUT_GENOME123317_00443	N-acetyl-lysine deacetylase	d__Bacteria;p__Firmicutes_A;c__Clostridia;o__Oscillospirales;f__Ruminococcaceae;g__;s__	p__Firmicutes_A	1.7e-12	43	309	1	[[41, 371]]	2.2e-12	GUT_GENOME123317	MAG	LiJ_2017__H2F514923__bin.19	60.19	102039
GUT_GENOME144544_03662	Acetylornithine deacetylase	d__Bacteria;p__Proteobacteria;c__Gammaproteobacteria;o__Enterobacterales;f__Enterobacteriaceae;g__Escherichia;s__Escherichia coli_D	p__Proteobacteria	1.3e-14	51.7	233	1	[[0, 284]]	1.6e-14	GUT_GENOME144544	Isolate	PATRIC_562_29099	50.58	102506	8.38651	0.0127241
GUT_GENOME147524_04656	Acetylornithine deacetylase	d__Bacteria;p__Proteobacteria;c__Gammaproteobacteria;o__Enterobacterales;f__Enterobacteriaceae;g__Citrobacter_A;s__Citrobacter_A farmeri	p__Proteobacteria	2.1e-15	54.4	231	1	[[1, 266]]	2.8e-15	GUT_GENOME147524	Isolate	PATRIC_67824_3	53.06	102534
GUT_GENOME145983_03681	Acetylornithine deacetylase	d__Bacteria;p__Proteobacteria;c__Gammaproteobacteria;o__Enterobacterales;f__Enterobacteriaceae;g__Escherichia;s__Escherichia fergusonii	p__Proteobacteria	1.3e-14	51.5	233	1	[[0, 279]]	1.6e-14	GUT_GENOME145983	Isolate	PATRIC_585054_5	49.92	102515
GUT_GENOME145983_02734	Acetylornithine deacetylase	d__Bacteria;p__Proteobacteria;c__Gammaproteobacteria;o__Enterobacterales;f__Enterobacteriaceae;g__Escherichia;s__Escherichia fergusonii	p__Proteobacteria	1.6e-07	28.1	236	1	[[43, 325]]	2.3e-07	GUT_GENOME145983	Isolate	PATRIC_585054_5	49.92	102515
GUT_GENOME175312_00532	Acetylornithine deacetylase	d__Bacteria;p__Actinobacteriota;c__Coriobacteriia;o__Coriobacteriales;f__Coriobacteriaceae;g__Collinsella;s__	p__Actinobacteriota	9.1e-10	34.3	321	1	[[8, 385]]	1.2e-09	GUT_GENOME175312	MAG	SRR2912799_bin.35	60.21	102860
GUT_GENOME171359_00329	Peptidase T	d__Bacteria;p__Firmicutes_I;c__Bacilli_A;o__Paenibacillales;f__Paenibacillaceae;g__Paenibacillus_B;s__	p__Firmicutes_I	5.6e-17	59.7	274	1	[[1, 374]]	6.2e-17	GUT_GENOME171359	MAG	SRR1779117_bin.2	54.64	102817
GUT_GENOME175216_01751	Acetylornithine deacetylase	d__Bacteria;p__Actinobacteriota;c__Coriobacteriia;o__Coriobacteriales;f__Coriobacteriaceae;g__Collinsella;s__	p__Actinobacteriota	2.6e-11	39.4	320	1	[[9, 388]]	3.2e-11	GUT_GENOME175216	MAG	SRR2912793_bin.2	60.08	102858
GUT_GENOME171597_02368	Acetylornithine deacetylase	d__Bacteria;p__Proteobacteria;c__Gammaproteobacteria;o__Enterobacterales;f__Enterobacteriaceae;g__Klebsiella_A;s__	p__Proteobacteria	5.7e-15	52.8	233	1	[[0, 277]]	7.1e-15	GUT_GENOME171597	MAG	SRR1793410_bin.1	53.67	102825
GUT_GENOME171597_04413	Acetylornithine deacetylase	d__Bacteria;p__Proteobacteria;c__Gammaproteobacteria;o__Enterobacterales;f__Enterobacteriaceae;g__Klebsiella_A;s__	p__Proteobacteria	5.6e-09	33	252	1	[[40, 313]]	8.6e-09	GUT_GENOME171597	MAG	SRR1793410_bin.1	53.67	102825
GUT_GENOME171597_03025	putative succinyl-diaminopimelate desuccinylase	d__Bacteria;p__Proteobacteria;c__Gammaproteobacteria;o__Enterobacterales;f__Enterobacteriaceae;g__Klebsiella_A;s__	p__Proteobacteria	3.4e-07	27.1	228	1	[[21, 294]]	4.7e-07	GUT_GENOME171597	MAG	SRR1793410_bin.1	53.67	102825
GUT_GENOME175097_01149	putative succinyl-diaminopimelate desuccinylase	d__Bacteria;p__Actinobacteriota;c__Coriobacteriia;o__Coriobacteriales;f__Coriobacteriaceae;g__Collinsella;s__	p__Actinobacteriota	6.9e-09	31.4	265	1	[[10, 391]]	8e-09	GUT_GENOME175097	MAG	SRR2912787_bin.21	59.93	102852
GUT_GENOME089014_00823	Peptidase T	d__Bacteria;p__Actinobacteriota;c__Coriobacteriia;o__Coriobacteriales;f__Eggerthellaceae;g__CAG-1427;s__CAG-1427 sp000434775	p__Actinobacteriota	1.1e-13	46.8	343	3	[[0, 185], [195, 341], [388, 447]]	1.7e-06	GUT_GENOME089014	MAG	ERS608560_12	45.09	101167	0.0911577	0.00957464
GUT_GENOME091189_00344	putative succinyl-diaminopimelate desuccinylase	d__Bacteria;p__Actinobacteriota;c__Coriobacteriia;o__Coriobacteriales;f__Coriobacteriaceae;g__Collinsella;s__	p__Actinobacteriota	1.1e-09	33.9	265	1	[[10, 385]]	1.3e-09	GUT_GENOME091189	MAG	FengQ_2015__SID31188__bin.89	60.26	101190
GUT_GENOME231320_01451	Acetylornithine deacetylase	d__Bacteria;p__Proteobacteria;c__Gammaproteobacteria;o__Enterobacterales;f__Enterobacteriaceae;g__Pseudescherichia;s__Pseudescherichia sp002298805	p__Proteobacteria	8.3e-14	48.7	247	1	[[6, 300]]	1.2e-13	GUT_GENOME231320	MAG	SRS332155_2	56.28	103365
GUT_GENOME019103_00936	Carboxypeptidase G2	d__Bacteria;p__Proteobacteria;c__Gammaproteobacteria;o__Burkholderiales;f__Burkholderiaceae;g__Sutterella;s__	p__Proteobacteria	1.4e-41	139.3	374	1	[[1, 369]]	1.6e-41	GUT_GENOME019103	MAG	CM_madagascar__V12_01_2FE__bin.42	60.07	100632
GUT_GENOME019103_01137	N-acetyl-lysine deacetylase	d__Bacteria;p__Proteobacteria;c__Gammaproteobacteria;o__Burkholderiales;f__Burkholderiaceae;g__Sutterella;s__	p__Proteobacteria	2e-09	33.3	247	1	[[49, 406]]	2.4e-09	GUT_GENOME019103	MAG	CM_madagascar__V12_01_2FE__bin.42	60.07	100632
GUT_GENOME019103_01270	Acetylornithine deacetylase	d__Bacteria;p__Proteobacteria;c__Gammaproteobacteria;o__Burkholderiales;f__Burkholderiaceae;g__Sutterella;s__	p__Proteobacteria	2.8e-09	32.8	278	1	[[32, 353]]	3.7e-09	GUT_GENOME019103	MAG	CM_madagascar__V12_01_2FE__bin.42	60.07	100632
GUT_GENOME019343_01792	putative succinyl-diaminopimelate desuccinylase	d__Bacteria;p__Actinobacteriota;c__Coriobacteriia;o__Coriobacteriales;f__Coriobacteriaceae;g__Collinsella;s__	p__Actinobacteriota	7.4e-11	37.8	277	1	[[9, 394]]	9.2e-11	GUT_GENOME019343	MAG	CM_madagascar__V54_01_1FE__bin.18	59.79	100645
GUT_GENOME023942_00646	putative succinyl-diaminopimelate desuccinylase	d__Bacteria;p__Actinobacteriota;c__Coriobacteriia;o__Coriobacteriales;f__Coriobacteriaceae;g__Collinsella;s__	p__Actinobacteriota	4.3e-07	25.4	244	1	[[0, 274]]	5.3e-07	GUT_GENOME023942	MAG	CosteaPI_2017__SID713A074-11-90-0__bin.34	60.31	100693
GUT_GENOME022512_00284	Peptidase T	d__Bacteria;p__Spirochaetota;c__Spirochaetia;o__Sphaerochaetales;f__Sphaerochaetaceae;g__UBA5920;s__	p__Spirochaetota	8.4e-13	44.3	265	1	[[22, 339]]	1.1e-12	GUT_GENOME022512	MAG	CosteaPI_2017__SID713A028-11-0-0__bin.37	40.18	100677
GUT_GENOME011995_02063	Succinyl-diaminopimelate desuccinylase	d__Bacteria;p__Spirochaetota;c__Spirochaetia;o__Treponematales;f__Treponemataceae;g__Treponema_D;s__	p__Spirochaetota	2.8e-18	62.5	243	1	[[40, 399]]	4.2e-18	GUT_GENOME011995	MAG	BritoIL_2016__M1.61.ST__bin.92	41.84	100479
GUT_GENOME096393_03338	Carboxypeptidase G2	d__Bacteria;p__Firmicutes_I;c__Bacilli_A;o__Aneurinibacillales;f__Aneurinibacillaceae;g__Aneurinibacillus;s__Aneurinibacillus aneurinilyticus	p__Firmicutes_I	7e-54	181.2	327	1	[[2, 378]]	8.3e-54	GUT_GENOME096393	Isolate	GCF_000466385	43.24	101453
GUT_GENOME096393_00681	putative succinyl-diaminopimelate desuccinylase	d__Bacteria;p__Firmicutes_I;c__Bacilli_A;o__Aneurinibacillales;f__Aneurinibacillaceae;g__Aneurinibacillus;s__Aneurinibacillus aneurinilyticus	p__Firmicutes_I	2.5e-21	73.9	334	1	[[8, 366]]	3.2e-21	GUT_GENOME096393	Isolate	GCF_000466385	43.24	101453
GUT_GENOME096393_00223	Peptidase T	d__Bacteria;p__Firmicutes_I;c__Bacilli_A;o__Aneurinibacillales;f__Aneurinibacillaceae;g__Aneurinibacillus;s__Aneurinibacillus aneurinilyticus	p__Firmicutes_I	1.8e-18	64.5	271	1	[[2, 289]]	2.3e-18	GUT_GENOME096393	Isolate	GCF_000466385	43.24	101453
GUT_GENOME096393_02503	N-formyl-4-amino-5-aminomethyl-2-methylpyrimidine deformylase	d__Bacteria;p__Firmicutes_I;c__Bacilli_A;o__Aneurinibacillales;f__Aneurinibacillaceae;g__Aneurinibacillus;s__Aneurinibacillus aneurinilyticus	p__Firmicutes_I	1.7e-15	54.6	229	1	[[1, 242]]	2.5e-15	GUT_GENOME096393	Isolate	GCF_000466385	43.24	101453
GUT_GENOME096393_00944	putative succinyl-diaminopimelate desuccinylase	d__Bacteria;p__Firmicutes_I;c__Bacilli_A;o__Aneurinibacillales;f__Aneurinibacillaceae;g__Aneurinibacillus;s__Aneurinibacillus aneurinilyticus	p__Firmicutes_I	5.7e-12	43.1	319	1	[[9, 374]]	9.3e-12	GUT_GENOME096393	Isolate	GCF_000466385	43.24	101453
GUT_GENOME096393_04141	putative hydrolase YxeP	d__Bacteria;p__Firmicutes_I;c__Bacilli_A;o__Aneurinibacillales;f__Aneurinibacillaceae;g__Aneurinibacillus;s__Aneurinibacillus aneurinilyticus	p__Firmicutes_I	3.4e-10	37.2	248	1	[[89, 365]]	4.8e-10	GUT_GENOME096393	Isolate	GCF_000466385	43.24	101453
GUT_GENOME096393_00045	N-formyl-4-amino-5-aminomethyl-2-methylpyrimidine deformylase	d__Bacteria;p__Firmicutes_I;c__Bacilli_A;o__Aneurinibacillales;f__Aneurinibacillaceae;g__Aneurinibacillus;s__Aneurinibacillus aneurinilyticus	p__Firmicutes_I	2.1e-08	31.3	255	1	[[38, 401]]	3.2e-08	GUT_GENOME096393	Isolate	GCF_000466385	43.24	101453
GUT_GENOME096296_01719	putative hydrolase YxeP	d__Bacteria;p__Firmicutes_A;c__Clostridia;o__Tissierellales;f__Helcococcaceae;g__Anaerococcus;s__Anaerococcus senegalensis	p__Firmicutes_A	1.7e-08	30	244	1	[[98, 360]]	2.4e-08	GUT_GENOME096296	Isolate	GCF_000321005	28.39	101424
GUT_GENOME096468_00946	Acetylornithine deacetylase	d__Bacteria;p__Proteobacteria;c__Gammaproteobacteria;o__Pseudomonadales;f__Pseudomonadaceae;g__Pseudomonas_E;s__Pseudomonas_E massiliensis	p__Proteobacteria	3.4e-09	33.6	331	1	[[23, 378]]	5.3e-09	GUT_GENOME096468	Isolate	GCF_000826105	62.34	101485
GUT_GENOME096468_03460	Acetylornithine deacetylase	d__Bacteria;p__Proteobacteria;c__Gammaproteobacteria;o__Pseudomonadales;f__Pseudomonadaceae;g__Pseudomonas_E;s__Pseudomonas_E massiliensis	p__Proteobacteria	1.7e-08	31.3	238	1	[[21, 342]]	2.2e-08	GUT_GENOME096468	Isolate	GCF_000826105	62.34	101485
GUT_GENOME096377_01892	Carboxypeptidase G2	d__Bacteria;p__Firmicutes_C;c__Negativicutes;o__Acidaminococcales;f__Acidaminococcaceae;g__Acidaminococcus;s__Acidaminococcus intestini	p__Firmicutes_C	1.5e-86	287.6	393	1	[[1, 390]]	1.8e-86	GUT_GENOME096377	Isolate	GCF_000411395	49.94	101440	5.46946	0.0127903
GUT_GENOME096377_01951	Carboxypeptidase G2	d__Bacteria;p__Firmicutes_C;c__Negativicutes;o__Acidaminococcales;f__Acidaminococcaceae;g__Acidaminococcus;s__Acidaminococcus intestini	p__Firmicutes_C	4e-46	154.3	377	1	[[1, 369]]	5e-46	GUT_GENOME096377	Isolate	GCF_000411395	49.94	101440	5.46946	0.0127903
GUT_GENOME096377_02016	Carboxypeptidase G2	d__Bacteria;p__Firmicutes_C;c__Negativicutes;o__Acidaminococcales;f__Acidaminococcaceae;g__Acidaminococcus;s__Acidaminococcus intestini	p__Firmicutes_C	5.2e-46	153.9	383	1	[[6, 390]]	6.5e-46	GUT_GENOME096377	Isolate	GCF_000411395	49.94	101440	5.46946	0.0127903
GUT_GENOME096377_00473	Carboxypeptidase G2	d__Bacteria;p__Firmicutes_C;c__Negativicutes;o__Acidaminococcales;f__Acidaminococcaceae;g__Acidaminococcus;s__Acidaminococcus intestini	p__Firmicutes_C	9.2e-37	123.4	382	1	[[5, 385]]	1.4e-36	GUT_GENOME096377	Isolate	GCF_000411395	49.94	101440	5.46946	0.0127903
GUT_GENOME096377_01546	Peptidase T	d__Bacteria;p__Firmicutes_C;c__Negativicutes;o__Acidaminococcales;f__Acidaminococcaceae;g__Acidaminococcus;s__Acidaminococcus intestini	p__Firmicutes_C	4.9e-16	55.1	272	1	[[0, 353]]	5.7e-16	GUT_GENOME096377	Isolate	GCF_000411395	49.94	101440	5.46946	0.0127903
GUT_GENOME096377_01985	N-acetyl-lysine deacetylase	d__Bacteria;p__Firmicutes_C;c__Negativicutes;o__Acidaminococcales;f__Acidaminococcaceae;g__Acidaminococcus;s__Acidaminococcus intestini	p__Firmicutes_C	1.7e-07	27	316	1	[[44, 373]]	2.8e-07	GUT_GENOME096377	Isolate	GCF_000411395	49.94	101440	5.46946	0.0127903
GUT_GENOME000984_00316	putative succinyl-diaminopimelate desuccinylase	d__Bacteria;p__Actinobacteriota;c__Coriobacteriia;o__Coriobacteriales;f__Coriobacteriaceae;g__Collinsella;s__	p__Actinobacteriota	4.8e-10	35.4	305	1	[[9, 390]]	6e-10	GUT_GENOME000984	Isolate	AF20-14LB	59.81	100180
GUT_GENOME132202_01731	Acetylornithine deacetylase	d__Archaea;p__Thermoplasmatota;c__Thermoplasmata;o__Methanomassiliicoccales;f__Methanomassiliicoccaceae;g__Methanomassiliicoccus_A;s__Methanomassiliicoccus_A intestinalis	p__Thermoplasmatota	3.4e-15	52.2	282	1	[[0, 271]]	6.4e-15	GUT_GENOME132202	Isolate	M_intestinalis_Mx1-Issoire	41.26	102160	0.638104	0.0014321
GUT_GENOME132202_01862	putative metallohydrolase	d__Archaea;p__Thermoplasmatota;c__Thermoplasmata;o__Methanomassiliicoccales;f__Methanomassiliicoccaceae;g__Methanomassiliicoccus_A;s__Methanomassiliicoccus_A intestinalis	p__Thermoplasmatota	5.6e-14	48.2	239	1	[[1, 243]]	8.5e-14	GUT_GENOME132202	Isolate	M_intestinalis_Mx1-Issoire	41.26	102160	0.638104	0.0014321
GUT_GENOME129089_01318	Acetylornithine deacetylase	d__Bacteria;p__Actinobacteriota;c__Coriobacteriia;o__Coriobacteriales;f__Coriobacteriaceae;g__Collinsella;s__	p__Actinobacteriota	2.1e-10	36.4	321	1	[[8, 390]]	2.6e-10	GUT_GENOME129089	MAG	LiuW_2016__SRR3993040__bin.18	60.12	102117
GUT_GENOME135796_01114	Acetylornithine deacetylase	d__Bacteria;p__Actinobacteriota;c__Coriobacteriia;o__Coriobacteriales;f__Coriobacteriaceae;g__Collinsella;s__	p__Actinobacteriota	1.3e-12	43.5	319	1	[[8, 380]]	1.6e-12	GUT_GENOME135796	MAG	NielsenHB_2014__O2_UC49_2__bin.19	59.62	102183
GUT_GENOME000584_00145	Peptidase T	d__Bacteria;p__Firmicutes_A;c__Clostridia;o__Tissierellales;f__Peptoniphilaceae;g__Peptoniphilus_A;s__Peptoniphilus_A harei_A	p__Firmicutes_A	3e-12	42.6	353	1	[[0, 365]]	3.6e-12	GUT_GENOME000584	Isolate	20298_3_36	34.09	100120
GUT_GENOME000760_01022	Peptidase T	d__Bacteria;p__Firmicutes_A;c__Clostridia;o__Peptostreptococcales;f__Peptostreptococcaceae;g__Paeniclostridium;s__Paeniclostridium sordellii	p__Firmicutes_A	3e-22	76.3	375	1	[[1, 368]]	4.1e-22	GUT_GENOME000760	Isolate	AF05-25	27.47	100157
GUT_GENOME000760_02054	Peptidase T	d__Bacteria;p__Firmicutes_A;c__Clostridia;o__Peptostreptococcales;f__Peptostreptococcaceae;g__Paeniclostridium;s__Paeniclostridium sordellii	p__Firmicutes_A	9.8e-13	44.9	232	1	[[2, 279]]	1.3e-12	GUT_GENOME000760	Isolate	AF05-25	27.47	100157
GUT_GENOME000760_01988	putative hydrolase YxeP	d__Bacteria;p__Firmicutes_A;c__Clostridia;o__Peptostreptococcales;f__Peptostreptococcaceae;g__Paeniclostridium;s__Paeniclostridium sordellii	p__Firmicutes_A	3e-07	26.9	271	1	[[32, 331]]	4.7e-07	GUT_GENOME000760	Isolate	AF05-25	27.47	100157
GUT_GENOME000767_00198	putative succinyl-diaminopimelate desuccinylase	d__Bacteria;p__Firmicutes_A;c__Clostridia;o__Lachnospirales;f__Lachnospiraceae;g__Sellimonas;s__Sellimonas intestinalis	p__Firmicutes_A	2.9e-13	46.5	267	1	[[6, 289]]	3.8e-13	GUT_GENOME000767	Isolate	AF07-16	45.17	100159	0.638104	0.00758608
GUT_GENOME000767_03074	N-formyl-4-amino-5-aminomethyl-2-methylpyrimidine deformylase	d__Bacteria;p__Firmicutes_A;c__Clostridia;o__Lachnospirales;f__Lachnospiraceae;g__Sellimonas;s__Sellimonas intestinalis	p__Firmicutes_A	2.1e-12	43.7	246	1	[[0, 278]]	2.6e-12	GUT_GENOME000767	Isolate	AF07-16	45.17	100159	0.638104	0.00758608
GUT_GENOME001016_02868	Carboxypeptidase G2	d__Bacteria;p__Firmicutes_A;c__Clostridia;o__Oscillospirales;f__Butyricicoccaceae;g__Agathobaculum;s__Agathobaculum butyriciproducens	p__Firmicutes_A	6.1e-45	151	394	1	[[1, 391]]	9.2e-45	GUT_GENOME001016	Isolate	AF22-28AC	53.24	100185	16.773	0.00773942
GUT_GENOME001016_02815	putative hydrolase YxeP	d__Bacteria;p__Firmicutes_A;c__Clostridia;o__Oscillospirales;f__Butyricicoccaceae;g__Agathobaculum;s__Agathobaculum butyriciproducens	p__Firmicutes_A	3.8e-08	29.7	271	1	[[35, 344]]	6e-08	GUT_GENOME001016	Isolate	AF22-28AC	53.24	100185	16.773	0.00773942
GUT_GENOME000770_00159	Beta-Ala-Xaa dipeptidase	d__Bacteria;p__Firmicutes;c__Bacilli;o__Lactobacillales;f__Lactobacillaceae;g__Lactobacillus;s__Lactobacillus amylovorus	p__Firmicutes	1.6e-06	23.7	247	3	[[1, 198], [181, 262], [251, 283]]	1e-05	GUT_GENOME000770	Isolate	AF08-3	37.84	100161	0.0911577	0.0151177
GUT_GENOME151671_01326	Succinyl-diaminopimelate desuccinylase	d__Bacteria;p__Proteobacteria;c__Alphaproteobacteria;o__RF32;f__CAG-977;g__CAG-977;s__	p__Proteobacteria	1.7e-16	56.8	237	1	[[21, 366]]	2.1e-16	GUT_GENOME151671	MAG	QinJ_2012__T2D-024__bin.77	53.68	102578
GUT_GENOME000962_02237	Acetylornithine deacetylase	d__Bacteria;p__Firmicutes_A;c__Clostridia;o__Lachnospirales;f__Lachnospiraceae;g__Faecalicatena;s__Faecalicatena sp000509105	p__Firmicutes_A	2.1e-16	57.5	277	1	[[26, 357]]	2.7e-16	GUT_GENOME000962	Isolate	AF19-21	45.99	100175
GUT_GENOME000962_02501	N-formyl-4-amino-5-aminomethyl-2-methylpyrimidine deformylase	d__Bacteria;p__Firmicutes_A;c__Clostridia;o__Lachnospirales;f__Lachnospiraceae;g__Faecalicatena;s__Faecalicatena sp000509105	p__Firmicutes_A	8.6e-13	45.6	259	1	[[1, 285]]	1.2e-12	GUT_GENOME000962	Isolate	AF19-21	45.99	100175
GUT_GENOME001039_00236	Peptidase T	d__Bacteria;p__Firmicutes;c__Bacilli;o__Bacillales;f__Bacillaceae_C;g__Bacillus_E;s__Bacillus_E coagulans	p__Firmicutes	3.5e-14	49.5	331	1	[[2, 349]]	4.4e-14	GUT_GENOME001039	Isolate	AF24-19	47.42	100191
GUT_GENOME000711_02447	Peptidase T	d__Bacteria;p__Firmicutes;c__Bacilli;o__Bacillales;f__Bacillaceae;g__Bacillus;s__Bacillus paralicheniformis	p__Firmicutes	1.9e-22	77.3	337	1	[[0, 368]]	2.1e-22	GUT_GENOME000711	Isolate	21673_4_91	45.93	100147
GUT_GENOME000611_01522	putative succinyl-diaminopimelate desuccinylase	d__Bacteria;p__Firmicutes_A;c__Clostridia;o__Tissierellales;f__Peptoniphilaceae;g__Peptoniphilus_C;s__	p__Firmicutes_A	5e-12	41.7	231	1	[[3, 321]]	6.4e-12	GUT_GENOME000611	Isolate	20298_3_66	48.91	100130
GUT_GENOME000996_00368	Carboxypeptidase G2	d__Bacteria;p__Firmicutes_C;c__Negativicutes;o__Selenomonadales;f__Selenomonadaceae;g__Mitsuokella;s__	p__Firmicutes_C	8.3e-65	216	377	1	[[7, 383]]	1.1e-64	GUT_GENOME000996	Isolate	AF21-1AC	56.58	100182
GUT_GENOME000996_01007	Peptidase T	d__Bacteria;p__Firmicutes_C;c__Negativicutes;o__Selenomonadales;f__Selenomonadaceae;g__Mitsuokella;s__	p__Firmicutes_C	9.2e-19	64.3	268	1	[[1, 270]]	1.3e-18	GUT_GENOME000996	Isolate	AF21-1AC	56.58	100182
GUT_GENOME000996_01429	putative succinyl-diaminopimelate desuccinylase	d__Bacteria;p__Firmicutes_C;c__Negativicutes;o__Selenomonadales;f__Selenomonadaceae;g__Mitsuokella;s__	p__Firmicutes_C	1.4e-17	60.4	250	1	[[4, 337]]	1.7e-17	GUT_GENOME000996	Isolate	AF21-1AC	56.58	100182
GUT_GENOME000996_01095	N-acetyl-lysine deacetylase	d__Bacteria;p__Firmicutes_C;c__Negativicutes;o__Selenomonadales;f__Selenomonadaceae;g__Mitsuokella;s__	p__Firmicutes_C	1.2e-12	44	228	1	[[21, 349]]	1.5e-12	GUT_GENOME000996	Isolate	AF21-1AC	56.58	100182
GUT_GENOME000996_01847	Succinyl-diaminopimelate desuccinylase	d__Bacteria;p__Firmicutes_C;c__Negativicutes;o__Selenomonadales;f__Selenomonadaceae;g__Mitsuokella;s__	p__Firmicutes_C	3e-11	39.5	238	1	[[18, 291]]	3.9e-11	GUT_GENOME000996	Isolate	AF21-1AC	56.58	100182
GUT_GENOME000996_01431	N-formyl-4-amino-5-aminomethyl-2-methylpyrimidine deformylase	d__Bacteria;p__Firmicutes_C;c__Negativicutes;o__Selenomonadales;f__Selenomonadaceae;g__Mitsuokella;s__	p__Firmicutes_C	1.5e-09	33.9	242	1	[[0, 250]]	2.1e-09	GUT_GENOME000996	Isolate	AF21-1AC	56.58	100182
GUT_GENOME000862_00183	putative succinyl-diaminopimelate desuccinylase	d__Bacteria;p__Firmicutes;c__Bacilli;o__Lactobacillales;f__Lactobacillaceae;g__Lactobacillus_H;s__Lactobacillus_H fermentum	p__Firmicutes	1.4e-13	46.9	240	1	[[32, 334]]	1.8e-13	GUT_GENOME000862	Isolate	AF15-40LB	51.97	100166
GUT_GENOME227837_01422	Carboxypeptidase G2	d__Bacteria;p__Firmicutes_C;c__Negativicutes;o__Veillonellales;f__Veillonellaceae;g__Veillonella_A;s__	p__Firmicutes_C	4.7e-54	180.4	384	1	[[1, 385]]	6.1e-54	GUT_GENOME227837	MAG	SRS294823_8	47.73	103343
GUT_GENOME227837_00824	Carboxypeptidase G2	d__Bacteria;p__Firmicutes_C;c__Negativicutes;o__Veillonellales;f__Veillonellaceae;g__Veillonella_A;s__	p__Firmicutes_C	3e-39	131.6	395	1	[[2, 392]]	3.7e-39	GUT_GENOME227837	MAG	SRS294823_8	47.73	103343
GUT_GENOME227837_00326	Peptidase T	d__Bacteria;p__Firmicutes_C;c__Negativicutes;o__Veillonellales;f__Veillonellaceae;g__Veillonella_A;s__	p__Firmicutes_C	2.9e-21	72.4	368	1	[[19, 375]]	3.5e-21	GUT_GENOME227837	MAG	SRS294823_8	47.73	103343
GUT_GENOME231299_01881	Putative succinyl-diaminopimelate desuccinylase DapE	d__Bacteria;p__Bacteroidota;c__Bacteroidia;o__Bacteroidales;f__Dysgonomonadaceae;g__Dysgonomonas;s__Dysgonomonas sp900079735	p__Bacteroidota	8.2e-16	55	255	1	[[30, 313]]	1.2e-15	GUT_GENOME231299	MAG	SRS311530_13	37.39	103362
GUT_GENOME257332_01675	Carboxypeptidase G2	d__Bacteria;p__Actinobacteriota;c__Coriobacteriia;o__Coriobacteriales;f__QAMH01;g__QAMH01;s__	p__Actinobacteriota	4.3e-18	61.6	301	1	[[0, 303]]	5.4e-18	GUT_GENOME257332	MAG	XieH_2016__YSZC12003_37181R1__bin.53	60.53	104138	0.182315	0.00729209
GUT_GENOME256383_00683	N-acetyl-lysine deacetylase	d__Bacteria;p__Firmicutes_A;c__Clostridia;o__Oscillospirales;f__;g__;s__	p__Firmicutes_A	5e-16	54.5	303	1	[[65, 380]]	6.9e-16	GUT_GENOME256383	MAG	XieH_2016__YSZC12003_37097__bin.75	59.77	104100
GUT_GENOME256383_00761	putative hydrolase YxeP	d__Bacteria;p__Firmicutes_A;c__Clostridia;o__Oscillospirales;f__;g__;s__	p__Firmicutes_A	2.8e-07	25.7	259	1	[[96, 378]]	3.9e-07	GUT_GENOME256383	MAG	XieH_2016__YSZC12003_37097__bin.75	59.77	104100
GUT_GENOME257001_01277	putative succinyl-diaminopimelate desuccinylase	d__Bacteria;p__Actinobacteriota;c__Coriobacteriia;o__Coriobacteriales;f__Coriobacteriaceae;g__Collinsella;s__	p__Actinobacteriota	3.1e-11	39.2	318	1	[[8, 360]]	4e-11	GUT_GENOME257001	MAG	XieH_2016__YSZC12003_37138__bin.40	60.36	104121
GUT_GENOME257420_01440	putative succinyl-diaminopimelate desuccinylase	d__Bacteria;p__Actinobacteriota;c__Coriobacteriia;o__Coriobacteriales;f__Coriobacteriaceae;g__Collinsella;s__Collinsella aerofaciens_F	p__Actinobacteriota	1.9e-10	36.6	306	1	[[9, 386]]	2.3e-10	GUT_GENOME257420	MAG	XieH_2016__YSZC12003_37189R1__bin.6	60.39	104141
GUT_GENOME096495_03704	Acetylornithine deacetylase	d__Bacteria;p__Firmicutes_A;c__Clostridia;o__Lachnospirales;f__Lachnospiraceae;g__Faecalicatena;s__Faecalicatena contorta_B	p__Firmicutes_A	1.6e-16	57.9	263	1	[[35, 347]]	2e-16	GUT_GENOME096495	Isolate	GCF_001244405	46.02	101499
GUT_GENOME096495_03798	N-formyl-4-amino-5-aminomethyl-2-methylpyrimidine deformylase	d__Bacteria;p__Firmicutes_A;c__Clostridia;o__Lachnospirales;f__Lachnospiraceae;g__Faecalicatena;s__Faecalicatena contorta_B	p__Firmicutes_A	1.2e-13	48.3	288	1	[[1, 285]]	1.7e-13	GUT_GENOME096495	Isolate	GCF_001244405	46.02	101499
GUT_GENOME096495_02069	Acetylornithine deacetylase	d__Bacteria;p__Firmicutes_A;c__Clostridia;o__Lachnospirales;f__Lachnospiraceae;g__Faecalicatena;s__Faecalicatena contorta_B	p__Firmicutes_A	4.2e-08	30.1	228	1	[[73, 333]]	7.2e-08	GUT_GENOME096495	Isolate	GCF_001244405	46.02	101499
GUT_GENOME096449_02735	Peptidase T	d__Bacteria;p__Firmicutes_A;c__Clostridia;o__Clostridiales;f__Clostridiaceae;g__Clostridium_L;s__Clostridium_L amazonitimonense	p__Firmicutes_A	1.5e-16	57.5	368	1	[[2, 368]]	1.9e-16	GUT_GENOME096449	Isolate	GCF_000753355	30.56	101477
GUT_GENOME096257_03179	putative succinyl-diaminopimelate desuccinylase	d__Bacteria;p__Firmicutes;c__Bacilli;o__Erysipelotrichales;f__Erysipelatoclostridiaceae;g__Erysipelatoclostridium;s__Erysipelatoclostridium ramosum	p__Firmicutes	1.3e-15	54.5	264	1	[[24, 329]]	1.7e-15	GUT_GENOME096257	Isolate	GCF_000244855	31.79	101400	0.182315	0.00944567
GUT_GENOME096374_00484	Peptidase T	d__Bacteria;p__Firmicutes;c__Bacilli;o__Bacillales_A;f__Planococcaceae;g__Paenisporosarcina_A;s__Paenisporosarcina_A sp000411295	p__Firmicutes	3.7e-16	56.2	271	1	[[0, 289]]	4.9e-16	GUT_GENOME096374	Isolate	GCF_000411295	39.25	101438
GUT_GENOME096374_01845	Succinyl-diaminopimelate desuccinylase	d__Bacteria;p__Firmicutes;c__Bacilli;o__Bacillales_A;f__Planococcaceae;g__Paenisporosarcina_A;s__Paenisporosarcina_A sp000411295	p__Firmicutes	1.6e-08	31.1	291	2	[[2, 246], [310, 390]]	6.4e-07	GUT_GENOME096374	Isolate	GCF_000411295	39.25	101438
GUT_GENOME125009_01161	putative succinyl-diaminopimelate desuccinylase	d__Bacteria;p__Actinobacteriota;c__Coriobacteriia;o__Coriobacteriales;f__Coriobacteriaceae;g__Collinsella;s__Collinsella sp002232035	p__Actinobacteriota	2e-11	39.7	320	1	[[8, 385]]	2.4e-11	GUT_GENOME125009	MAG	LiJ_2017__nHM410714__bin.44	60.67	102058
GUT_GENOME122014_02516	putative succinyl-diaminopimelate desuccinylase	d__Bacteria;p__Firmicutes_A;c__Clostridia;o__Lachnospirales;f__Lachnospiraceae;g__;s__	p__Firmicutes_A	3.9e-13	45.9	256	1	[[38, 372]]	4.7e-13	GUT_GENOME122014	MAG	LiJ_2014__V1.FI34__bin.44	47.39	102025
GUT_GENOME122014_00646	Succinyl-diaminopimelate desuccinylase	d__Bacteria;p__Firmicutes_A;c__Clostridia;o__Lachnospirales;f__Lachnospiraceae;g__;s__	p__Firmicutes_A	5.3e-08	28.9	317	1	[[75, 406]]	1e-07	GUT_GENOME122014	MAG	LiJ_2014__V1.FI34__bin.44	47.39	102025
GUT_GENOME126570_01142	Peptidase T	d__Bacteria;p__Firmicutes_C;c__Negativicutes;o__Acidaminococcales;f__Acidaminococcaceae;g__Succiniclasticum;s__Succiniclasticum sp900315805	p__Firmicutes_C	5.5e-26	87.7	248	1	[[4, 276]]	7.2e-26	GUT_GENOME126570	MAG	LiSS_2016__FAT_020-22-42-0__bin.13	59.22	102079
GUT_GENOME126570_00442	Peptidase T	d__Bacteria;p__Firmicutes_C;c__Negativicutes;o__Acidaminococcales;f__Acidaminococcaceae;g__Succiniclasticum;s__Succiniclasticum sp900315805	p__Firmicutes_C	6.8e-24	80.8	334	1	[[1, 350]]	7.9e-24	GUT_GENOME126570	MAG	LiSS_2016__FAT_020-22-42-0__bin.13	59.22	102079
GUT_GENOME126570_01234	N-acetyl-lysine deacetylase	d__Bacteria;p__Firmicutes_C;c__Negativicutes;o__Acidaminococcales;f__Acidaminococcaceae;g__Succiniclasticum;s__Succiniclasticum sp900315805	p__Firmicutes_C	2.2e-13	46.1	304	1	[[44, 376]]	3e-13	GUT_GENOME126570	MAG	LiSS_2016__FAT_020-22-42-0__bin.13	59.22	102079
GUT_GENOME192714_01298	putative hydrolase YxeP	d__Bacteria;p__Firmicutes_A;c__Clostridia;o__Lachnospirales;f__Lachnospiraceae;g__Dorea;s__	p__Firmicutes_A	4.4e-09	32.3	264	1	[[33, 318]]	8e-09	GUT_GENOME192714	MAG	SRR5056942_bin.77	42.5	102992
GUT_GENOME190202_00820	putative succinyl-diaminopimelate desuccinylase	d__Bacteria;p__Actinobacteriota;c__Coriobacteriia;o__Coriobacteriales;f__Coriobacteriaceae;g__Collinsella;s__Collinsella aerofaciens_F	p__Actinobacteriota	2e-11	39.7	313	1	[[8, 383]]	2.4e-11	GUT_GENOME190202	MAG	SRR5056780_bin.7	59.61	102981
GUT_GENOME179941_00869	putative succinyl-diaminopimelate desuccinylase	d__Bacteria;p__Actinobacteriota;c__Coriobacteriia;o__Coriobacteriales;f__Coriobacteriaceae;g__Collinsella;s__	p__Actinobacteriota	1.2e-11	40.4	326	1	[[8, 392]]	1.5e-11	GUT_GENOME179941	MAG	SRR3737006_bin.37	60.19	102918
GUT_GENOME129724_01549	Acetylornithine deacetylase	d__Bacteria;p__Actinobacteriota;c__Coriobacteriia;o__Coriobacteriales;f__Coriobacteriaceae;g__Collinsella;s__	p__Actinobacteriota	4.1e-10	35.3	265	1	[[10, 388]]	4.8e-10	GUT_GENOME129724	MAG	LiuW_2016__SRR3993064__bin.1	60.54	102130
GUT_GENOME258001_01212	putative succinyl-diaminopimelate desuccinylase	d__Bacteria;p__Actinobacteriota;c__Coriobacteriia;o__Coriobacteriales;f__Coriobacteriaceae;g__Collinsella;s__	p__Actinobacteriota	3.8e-11	38.8	308	1	[[8, 393]]	4.7e-11	GUT_GENOME258001	MAG	XieH_2016__YSZC12003_37206__bin.15	60.02	104156
GUT_GENOME145698_04363	Acetylornithine deacetylase	d__Bacteria;p__Proteobacteria;c__Gammaproteobacteria;o__Enterobacterales;f__Enterobacteriaceae;g__Klebsiella;s__Klebsiella variicola	p__Proteobacteria	7.5e-16	55.8	236	1	[[0, 278]]	9.1e-16	GUT_GENOME145698	Isolate	PATRIC_573_15566	57.23	102511
GUT_GENOME145698_00707	Acetylornithine deacetylase	d__Bacteria;p__Proteobacteria;c__Gammaproteobacteria;o__Enterobacterales;f__Enterobacteriaceae;g__Klebsiella;s__Klebsiella variicola	p__Proteobacteria	3.5e-10	37.1	234	1	[[36, 288]]	5.7e-10	GUT_GENOME145698	Isolate	PATRIC_573_15566	57.23	102511
GUT_GENOME152588_00023	Succinyl-diaminopimelate desuccinylase	d__Bacteria;p__Firmicutes_A;c__Clostridia;o__Oscillospirales;f__Oscillospiraceae;g__Lawsonibacter;s__	p__Firmicutes_A	7.3e-14	48	230	2	[[2, 217], [347, 368]]	4e-13	GUT_GENOME152588	MAG	QinJ_2012__T2D-070__bin.12	59.57	102588
GUT_GENOME147777_01949	N-acetyl-lysine deacetylase	d__Bacteria;p__Firmicutes_C;c__Negativicutes;o__Veillonellales;f__Megasphaeraceae;g__Megasphaera;s__Megasphaera elsdenii	p__Firmicutes_C	1.7e-07	27.1	255	1	[[37, 329]]	2.1e-07	GUT_GENOME147777	Isolate	PATRIC_907_14	53.17	102547	0.273473	0.017711
GUT_GENOME143751_04049	Carboxypeptidase G2	d__Bacteria;p__Proteobacteria;c__Gammaproteobacteria;o__Enterobacterales;f__Enterobacteriaceae;g__Enterobacter;s__Enterobacter cloacae_H	p__Proteobacteria	3.5e-56	188.7	377	1	[[1, 370]]	4.5e-56	GUT_GENOME143751	Isolate	PATRIC_550_1588	55.86	102502
GUT_GENOME152800_00389	Carboxypeptidase G2	d__Bacteria;p__Proteobacteria;c__Gammaproteobacteria;o__Burkholderiales;f__Burkholderiaceae;g__CAG-521;s__	p__Proteobacteria	2.9e-51	171	380	1	[[1, 373]]	3.8e-51	GUT_GENOME152800	MAG	QinJ_2012__T2D-080__bin.28	48.51	102591
GUT_GENOME100884_00708	putative succinyl-diaminopimelate desuccinylase	d__Bacteria;p__Actinobacteriota;c__Coriobacteriia;o__Coriobacteriales;f__Coriobacteriaceae;g__Collinsella;s__	p__Actinobacteriota	1.2e-11	40.3	266	1	[[10, 385]]	1.4e-11	GUT_GENOME100884	MAG	HMP_2012__SRS014979__bin.23	60.06	101653
GUT_GENOME101260_01560	Putative succinyl-diaminopimelate desuccinylase DapE	d__Bacteria;p__Bacteroidota;c__Bacteroidia;o__Bacteroidales;f__Bacteroidaceae;g__Paraprevotella;s__	p__Bacteroidota	3.8e-12	42.7	231	1	[[13, 276]]	5.3e-12	GUT_GENOME101260	MAG	HMP_2012__SRS016095__bin.37	50.01	101659
GUT_GENOME098569_01655	Peptidase T	d__Bacteria;p__Firmicutes_A;c__Clostridia;o__Oscillospirales;f__Oscillospiraceae;g__Oscillibacter;s__	p__Firmicutes_A	1.5e-10	37.3	257	1	[[2, 270]]	2e-10	GUT_GENOME098569	MAG	HeQ_2017__SZAXPI029494-94__bin.15	64.16	101616
GUT_GENOME034170_01347	Carboxypeptidase G2	d__Bacteria;p__Proteobacteria;c__Gammaproteobacteria;o__Burkholderiales;f__Burkholderiaceae;g__CAG-521;s__	p__Proteobacteria	1.6e-51	171.7	379	1	[[1, 371]]	2.1e-51	GUT_GENOME034170	MAG	ERR1190721_bin.6	48.19	100814
GUT_GENOME089306_01184	Carboxypeptidase G2	d__Bacteria;p__Firmicutes_A;c__Clostridia;o__Christensenellales;f__CAG-74;g__;s__	p__Firmicutes_A	4.2e-36	121.2	384	1	[[3, 375]]	7.6e-36	GUT_GENOME089306	MAG	ERS608572_48	56.41	101170
GUT_GENOME091537_01219	Carboxypeptidase G2	d__Bacteria;p__Actinobacteriota;c__Coriobacteriia;o__Coriobacteriales;f__QAMH01;g__QAMH01;s__QAMH01 sp003149935	p__Actinobacteriota	2.4e-16	55.9	277	1	[[0, 293]]	2.9e-16	GUT_GENOME091537	MAG	FengQ_2015__SID31300__bin.25	59.24	101194
GUT_GENOME084693_00965	putative succinyl-diaminopimelate desuccinylase	d__Bacteria;p__Actinobacteriota;c__Coriobacteriia;o__Coriobacteriales;f__Coriobacteriaceae;g__Collinsella;s__	p__Actinobacteriota	1.9e-11	39.7	320	1	[[8, 388]]	2.4e-11	GUT_GENOME084693	MAG	ERS537329_74	59.89	101135
GUT_GENOME086481_01751	Carboxypeptidase G2	d__Bacteria;p__Fusobacteriota;c__Fusobacteriia;o__Fusobacteriales;f__Fusobacteriaceae;g__Fusobacterium_A;s__Fusobacterium_A varium_A	p__Fusobacteriota	2.2e-53	178.8	378	1	[[3, 373]]	2.8e-53	GUT_GENOME086481	MAG	ERS537391_51	29.21	101148
GUT_GENOME086481_02346	Carboxypeptidase G2	d__Bacteria;p__Fusobacteriota;c__Fusobacteriia;o__Fusobacteriales;f__Fusobacteriaceae;g__Fusobacterium_A;s__Fusobacterium_A varium_A	p__Fusobacteriota	1.1e-41	140.2	377	1	[[0, 369]]	1.8e-41	GUT_GENOME086481	MAG	ERS537391_51	29.21	101148
GUT_GENOME086481_01692	N-formyl-4-amino-5-aminomethyl-2-methylpyrimidine deformylase	d__Bacteria;p__Fusobacteriota;c__Fusobacteriia;o__Fusobacteriales;f__Fusobacteriaceae;g__Fusobacterium_A;s__Fusobacterium_A varium_A	p__Fusobacteriota	3.4e-22	76	278	1	[[11, 377]]	4e-22	GUT_GENOME086481	MAG	ERS537391_51	29.21	101148
GUT_GENOME086481_02760	putative hydrolase YxeP	d__Bacteria;p__Fusobacteriota;c__Fusobacteriia;o__Fusobacteriales;f__Fusobacteriaceae;g__Fusobacterium_A;s__Fusobacterium_A varium_A	p__Fusobacteriota	6.9e-10	35.4	260	1	[[47, 348]]	9.1e-10	GUT_GENOME086481	MAG	ERS537391_51	29.21	101148
GUT_GENOME086481_01220	Peptidase T	d__Bacteria;p__Fusobacteriota;c__Fusobacteriia;o__Fusobacteriales;f__Fusobacteriaceae;g__Fusobacterium_A;s__Fusobacterium_A varium_A	p__Fusobacteriota	1.2e-09	34.6	323	1	[[1, 361]]	1.6e-09	GUT_GENOME086481	MAG	ERS537391_51	29.21	101148
GUT_GENOME086481_00189	putative hydrolase YxeP	d__Bacteria;p__Fusobacteriota;c__Fusobacteriia;o__Fusobacteriales;f__Fusobacteriaceae;g__Fusobacterium_A;s__Fusobacterium_A varium_A	p__Fusobacteriota	1.2e-07	28	268	1	[[58, 359]]	2.2e-07	GUT_GENOME086481	MAG	ERS537391_51	29.21	101148
GUT_GENOME098775_02155	Acetylornithine deacetylase	d__Bacteria;p__Firmicutes_A;c__Clostridia;o__Lachnospirales;f__Lachnospiraceae;g__Clostridium_M;s__	p__Firmicutes_A	2.1e-10	37.2	337	1	[[3, 376]]	2.7e-10	GUT_GENOME098775	MAG	HeQ_2017__SZAXPI029544-123__bin.18	49.41	101622
GUT_GENOME098798_00394	Carboxypeptidase G2	d__Bacteria;p__Firmicutes_C;c__Negativicutes;o__Acidaminococcales;f__Acidaminococcaceae;g__Phascolarctobacterium;s__	p__Firmicutes_C	4.3e-62	206.9	394	1	[[1, 386]]	5.2e-62	GUT_GENOME098798	MAG	HeQ_2017__SZAXPI029546-133__bin.17	47.18	101626
GUT_GENOME098798_00392	Carboxypeptidase G2	d__Bacteria;p__Firmicutes_C;c__Negativicutes;o__Acidaminococcales;f__Acidaminococcaceae;g__Phascolarctobacterium;s__	p__Firmicutes_C	2e-58	194.9	394	1	[[1, 385]]	2.4e-58	GUT_GENOME098798	MAG	HeQ_2017__SZAXPI029546-133__bin.17	47.18	101626
GUT_GENOME098798_00762	Carboxypeptidase G2	d__Bacteria;p__Firmicutes_C;c__Negativicutes;o__Acidaminococcales;f__Acidaminococcaceae;g__Phascolarctobacterium;s__	p__Firmicutes_C	1.6e-44	149	381	2	[[3, 250], [252, 406]]	1.5e-36	GUT_GENOME098798	MAG	HeQ_2017__SZAXPI029546-133__bin.17	47.18	101626
GUT_GENOME098798_00052	Peptidase T	d__Bacteria;p__Firmicutes_C;c__Negativicutes;o__Acidaminococcales;f__Acidaminococcaceae;g__Phascolarctobacterium;s__	p__Firmicutes_C	6.1e-23	77.9	268	1	[[0, 335]]	7.3e-23	GUT_GENOME098798	MAG	HeQ_2017__SZAXPI029546-133__bin.17	47.18	101626
GUT_GENOME098798_01326	Peptidase T	d__Bacteria;p__Firmicutes_C;c__Negativicutes;o__Acidaminococcales;f__Acidaminococcaceae;g__Phascolarctobacterium;s__	p__Firmicutes_C	1.5e-20	70	255	1	[[3, 276]]	2e-20	GUT_GENOME098798	MAG	HeQ_2017__SZAXPI029546-133__bin.17	47.18	101626
GUT_GENOME098402_01247	Carboxypeptidase G2	d__Bacteria;p__Proteobacteria;c__Gammaproteobacteria;o__Burkholderiales;f__Burkholderiaceae;g__CAG-521;s__CAG-521 sp002329575	p__Proteobacteria	5.7e-53	176.3	379	1	[[1, 371]]	8.2e-53	GUT_GENOME098402	MAG	HeQ_2017__SZAXPI029482-77__bin.3	48.78	101614
GUT_GENOME098402_01134	N-acetyldiaminopimelate deacetylase	d__Bacteria;p__Proteobacteria;c__Gammaproteobacteria;o__Burkholderiales;f__Burkholderiaceae;g__CAG-521;s__CAG-521 sp002329575	p__Proteobacteria	9.8e-06	20.6	232	1	[[26, 302]]	1.3e-05	GUT_GENOME098402	MAG	HeQ_2017__SZAXPI029482-77__bin.3	48.78	101614
GUT_GENOME101940_00106	Succinyl-diaminopimelate desuccinylase	d__Bacteria;p__Bacteroidota;c__Bacteroidia;o__Bacteroidales;f__Rikenellaceae;g__Alistipes;s__	p__Bacteroidota	7.4e-12	41.7	236	1	[[2, 301]]	8.8e-12	GUT_GENOME101940	MAG	HMP_2012__SRS020869__bin.29	54.23	101663
GUT_GENOME099050_01518	Carboxypeptidase G2	d__Bacteria;p__Desulfobacterota_A;c__Desulfovibrionia;o__Desulfovibrionales;f__Desulfovibrionaceae;g__Bilophila;s__	p__Desulfobacterota_A	1.2e-47	160	381	1	[[2, 398]]	1.5e-47	GUT_GENOME099050	MAG	HeQ_2017__SZAXPI029557-42__bin.30	60.84	101631
GUT_GENOME099050_03158	Carboxypeptidase G2	d__Bacteria;p__Desulfobacterota_A;c__Desulfovibrionia;o__Desulfovibrionales;f__Desulfovibrionaceae;g__Bilophila;s__	p__Desulfobacterota_A	1e-44	150.3	376	1	[[10, 400]]	1.4e-44	GUT_GENOME099050	MAG	HeQ_2017__SZAXPI029557-42__bin.30	60.84	101631
GUT_GENOME099050_02946	Carboxypeptidase G2	d__Bacteria;p__Desulfobacterota_A;c__Desulfovibrionia;o__Desulfovibrionales;f__Desulfovibrionaceae;g__Bilophila;s__	p__Desulfobacterota_A	3.8e-41	138.6	384	1	[[5, 399]]	4.9e-41	GUT_GENOME099050	MAG	HeQ_2017__SZAXPI029557-42__bin.30	60.84	101631
GUT_GENOME098162_01220	putative succinyl-diaminopimelate desuccinylase	d__Bacteria;p__Firmicutes_A;c__Clostridia;o__Tissierellales;f__Sporanaerobacteraceae;g__Sporanaerobacter;s__Sporanaerobacter acetigenes	p__Firmicutes_A	4.6e-24	81.5	249	1	[[39, 323]]	6.1e-24	GUT_GENOME098162	MAG	HeQ_2017__SZAXPI029461-129__bin.7	30.88	101610
GUT_GENOME098912_01119	putative succinyl-diaminopimelate desuccinylase	d__Bacteria;p__Actinobacteriota;c__Coriobacteriia;o__Coriobacteriales;f__Coriobacteriaceae;g__Collinsella;s__	p__Actinobacteriota	3e-12	42.4	272	1	[[10, 392]]	3.6e-12	GUT_GENOME098912	MAG	HeQ_2017__SZAXPI029552-169__bin.49	60.12	101628
GUT_GENOME020571_00226	Carboxypeptidase G2	d__Bacteria;p__Firmicutes_A;c__Clostridia;o__Oscillospirales;f__Oscillospiraceae;g__CAG-170;s__CAG-170 sp002404795	p__Firmicutes_A	6.4e-37	124	379	1	[[2, 379]]	1e-36	GUT_GENOME020571	MAG	CosteaPI_2017__halbarad-11-7-0__bin.19	61.51	100651	27.8943	0.0110398
GUT_GENOME020571_00738	Acetylornithine deacetylase	d__Bacteria;p__Firmicutes_A;c__Clostridia;o__Oscillospirales;f__Oscillospiraceae;g__CAG-170;s__CAG-170 sp002404795	p__Firmicutes_A	6.9e-11	38.1	236	1	[[1, 265]]	1.3e-10	GUT_GENOME020571	MAG	CosteaPI_2017__halbarad-11-7-0__bin.19	61.51	100651	27.8943	0.0110398
GUT_GENOME023976_00515	putative succinyl-diaminopimelate desuccinylase	d__Bacteria;p__Actinobacteriota;c__Coriobacteriia;o__Coriobacteriales;f__Coriobacteriaceae;g__Collinsella;s__	p__Actinobacteriota	2.5e-10	36.1	264	1	[[11, 394]]	2.8e-10	GUT_GENOME023976	MAG	CosteaPI_2017__SID713A076-11-0-0__bin.25	59.81	100694
GUT_GENOME019818_00892	putative succinyl-diaminopimelate desuccinylase	d__Bacteria;p__Actinobacteriota;c__Coriobacteriia;o__Coriobacteriales;f__Coriobacteriaceae;g__Collinsella;s__	p__Actinobacteriota	3e-12	42.4	320	1	[[8, 388]]	3.7e-12	GUT_GENOME019818	MAG	CosteaPI_2017__bugkiller-11-918-0__bin.16	60.11	100648
GUT_GENOME172932_03895	Peptidase T	d__Bacteria;p__Firmicutes_A;c__Clostridia;o__Lachnospirales;f__Lachnospiraceae;g__Anaerocolumna;s__Anaerocolumna aminovalerica	p__Firmicutes_A	4.4e-17	59.5	258	1	[[1, 280]]	5.7e-17	GUT_GENOME172932	MAG	SRR2047830_bin.12	34.87	102836
GUT_GENOME174809_01521	Carboxypeptidase G2	d__Bacteria;p__Desulfobacterota_A;c__Desulfovibrionia;o__Desulfovibrionales;f__Desulfovibrionaceae;g__Desulfovibrio;s__	p__Desulfobacterota_A	1.9e-47	159.2	379	1	[[6, 398]]	2.4e-47	GUT_GENOME174809	MAG	SRR2857970_bin.66	61.58	102846	0.0911577	0.00660143
GUT_GENOME174809_01518	Carboxypeptidase G2	d__Bacteria;p__Desulfobacterota_A;c__Desulfovibrionia;o__Desulfovibrionales;f__Desulfovibrionaceae;g__Desulfovibrio;s__	p__Desulfobacterota_A	2e-41	139.3	378	1	[[9, 399]]	2.6e-41	GUT_GENOME174809	MAG	SRR2857970_bin.66	61.58	102846	0.0911577	0.00660143
GUT_GENOME174809_01718	2-aminoethylphosphonate--pyruvate transaminase	d__Bacteria;p__Desulfobacterota_A;c__Desulfovibrionia;o__Desulfovibrionales;f__Desulfovibrionaceae;g__Desulfovibrio;s__	p__Desulfobacterota_A	6.5e-23	78.3	239	1	[[244, 507]]	9.9e-23	GUT_GENOME174809	MAG	SRR2857970_bin.66	61.58	102846	0.0911577	0.00660143
GUT_GENOME145984_02964	Carboxypeptidase G2	d__Bacteria;p__Proteobacteria;c__Gammaproteobacteria;o__Enterobacterales;f__Enterobacteriaceae;g__Proteus;s__Proteus vulgaris_A	p__Proteobacteria	7.2e-63	210.2	375	1	[[2, 377]]	8.6e-63	GUT_GENOME145984	Isolate	PATRIC_585_33	37.79	102516
GUT_GENOME147152_02485	Carboxypeptidase G2	d__Bacteria;p__Proteobacteria;c__Gammaproteobacteria;o__Enterobacterales;f__Aeromonadaceae;g__Aeromonas;s__Aeromonas veronii	p__Proteobacteria	1.6e-60	202.7	378	1	[[3, 374]]	2.5e-60	GUT_GENOME147152	Isolate	PATRIC_654_128	58.45	102529
GUT_GENOME147152_00353	Carboxypeptidase G2	d__Bacteria;p__Proteobacteria;c__Gammaproteobacteria;o__Enterobacterales;f__Aeromonadaceae;g__Aeromonas;s__Aeromonas veronii	p__Proteobacteria	1.5e-48	163.3	377	1	[[7, 379]]	1.9e-48	GUT_GENOME147152	Isolate	PATRIC_654_128	58.45	102529
GUT_GENOME147109_00832	Peptidase T	d__Bacteria;p__Firmicutes_A;c__Clostridia;o__Christensenellales;f__Christensenellaceae;g__Christensenella;s__Christensenella minuta	p__Firmicutes_A	9.6e-15	51.3	280	1	[[0, 356]]	1.1e-14	GUT_GENOME147109	Isolate	PATRIC_626937_8	51.48	102523
GUT_GENOME001026_00214	putative succinyl-diaminopimelate desuccinylase	d__Bacteria;p__Actinobacteriota;c__Coriobacteriia;o__Coriobacteriales;f__Coriobacteriaceae;g__Collinsella;s__	p__Actinobacteriota	5e-09	31.9	266	1	[[9, 393]]	6.3e-09	GUT_GENOME001026	Isolate	AF23-4AC	59.84	100188
GUT_GENOME249268_00612	N-acetyl-lysine deacetylase	d__Bacteria;p__Bacteroidota;c__Bacteroidia;o__Bacteroidales;f__Marinifilaceae;g__Odoribacter;s__	p__Bacteroidota	6.6e-15	51.9	267	1	[[22, 311]]	8.7e-15	GUT_GENOME249268	MAG	WenC_2017__RA005__bin.5	44.79	103908
GUT_GENOME009437_02197	Carboxypeptidase G2	d__Bacteria;p__Firmicutes_B;c__Peptococcia;o__Peptococcales;f__Peptococcaceae;g__UBA7185;s__	p__Firmicutes_B	8.4e-26	87.7	372	1	[[1, 367]]	1.1e-25	GUT_GENOME009437	MAG	Bengtsson-PalmeJ_2015__TRAVELRES45__bin.137	45.6	100413
GUT_GENOME011202_00982	Cytosol non-specific dipeptidase	d__Bacteria;p__Cyanobacteria;c__Vampirovibrionia;o__Gastranaerophilales;f__Gastranaerophilaceae;g__QHMH01;s__QHMH01 sp003258795	p__Cyanobacteria	7e-08	27.7	255	2	[[46, 200], [254, 403]]	0.00064	GUT_GENOME011202	MAG	BritoIL_2016__M1.16.ST__bin.62	32.12	100464
GUT_GENOME143139_01046	Succinyl-diaminopimelate desuccinylase	d__Bacteria;p__Actinobacteriota;c__Coriobacteriia;o__Coriobacteriales;f__Eggerthellaceae;g__Rubneribacter;s__Rubneribacter badeniensis	p__Actinobacteriota	6.3e-14	48.5	271	1	[[0, 279]]	9.7e-14	GUT_GENOME143139	Isolate	PATRIC_2070688_3	65.14	102441	0.0911577	0.0111523
GUT_GENOME142588_02836	Peptidase T	d__Bacteria;p__Firmicutes;c__Bacilli;o__Bacillales;f__Bacillaceae_A;g__Bacillus_BE;s__Bacillus_BE massilionigeriensis	p__Firmicutes	1.3e-16	58	329	1	[[1, 340]]	1.6e-16	GUT_GENOME142588	Isolate	PATRIC_1805475_3	36.65	102404
GUT_GENOME142588_01114	Hippurate hydrolase	d__Bacteria;p__Firmicutes;c__Bacilli;o__Bacillales;f__Bacillaceae_A;g__Bacillus_BE;s__Bacillus_BE massilionigeriensis	p__Firmicutes	9.4e-09	32.1	233	1	[[94, 359]]	1.3e-08	GUT_GENOME142588	Isolate	PATRIC_1805475_3	36.65	102404
GUT_GENOME143727_03846	Acetylornithine deacetylase	d__Bacteria;p__Proteobacteria;c__Gammaproteobacteria;o__Enterobacterales;f__Enterobacteriaceae;g__Klebsiella_B;s__Klebsiella_B aerogenes	p__Proteobacteria	4.8e-09	33.3	236	1	[[33, 288]]	7.1e-09	GUT_GENOME143727	Isolate	PATRIC_548_115	55	102497
GUT_GENOME098242_00740	Carboxypeptidase G2	d__Bacteria;p__Firmicutes_A;c__Clostridia;o__Oscillospirales;f__Ruminococcaceae;g__Phocea;s__Phocea massiliensis	p__Firmicutes_A	1.7e-51	171.9	398	1	[[0, 392]]	2e-51	GUT_GENOME098242	MAG	HeQ_2017__SZAXPI029466-158__bin.32	56.58	101611
GUT_GENOME098242_00175	Carboxypeptidase G2	d__Bacteria;p__Firmicutes_A;c__Clostridia;o__Oscillospirales;f__Ruminococcaceae;g__Phocea;s__Phocea massiliensis	p__Firmicutes_A	1.4e-45	152.4	394	1	[[1, 390]]	1.7e-45	GUT_GENOME098242	MAG	HeQ_2017__SZAXPI029466-158__bin.32	56.58	101611
GUT_GENOME098242_00315	putative succinyl-diaminopimelate desuccinylase	d__Bacteria;p__Firmicutes_A;c__Clostridia;o__Oscillospirales;f__Ruminococcaceae;g__Phocea;s__Phocea massiliensis	p__Firmicutes_A	3.1e-17	59	242	1	[[40, 355]]	3.9e-17	GUT_GENOME098242	MAG	HeQ_2017__SZAXPI029466-158__bin.32	56.58	101611
GUT_GENOME098242_01225	Peptidase T	d__Bacteria;p__Firmicutes_A;c__Clostridia;o__Oscillospirales;f__Ruminococcaceae;g__Phocea;s__Phocea massiliensis	p__Firmicutes_A	3.4e-14	48.9	272	1	[[0, 279]]	5.6e-14	GUT_GENOME098242	MAG	HeQ_2017__SZAXPI029466-158__bin.32	56.58	101611
GUT_GENOME098242_00179	Peptidase T	d__Bacteria;p__Firmicutes_A;c__Clostridia;o__Oscillospirales;f__Ruminococcaceae;g__Phocea;s__Phocea massiliensis	p__Firmicutes_A	3.9e-09	32.3	279	1	[[0, 366]]	4.7e-09	GUT_GENOME098242	MAG	HeQ_2017__SZAXPI029466-158__bin.32	56.58	101611
GUT_GENOME250710_00304	Carboxypeptidase G2	d__Bacteria;p__Desulfobacterota_A;c__Desulfovibrionia;o__Desulfovibrionales;f__Desulfovibrionaceae;g__Mailhella;s__	p__Desulfobacterota_A	2.3e-87	290.2	395	1	[[1, 398]]	3e-87	GUT_GENOME250710	MAG	WenC_2017__RA120__bin.10	59.53	103924
GUT_GENOME250710_00814	Carboxypeptidase G2	d__Bacteria;p__Desulfobacterota_A;c__Desulfovibrionia;o__Desulfovibrionales;f__Desulfovibrionaceae;g__Mailhella;s__	p__Desulfobacterota_A	1e-28	96.9	386	1	[[0, 385]]	1.3e-28	GUT_GENOME250710	MAG	WenC_2017__RA120__bin.10	59.53	103924
GUT_GENOME111314_01079	N-formyl-4-amino-5-aminomethyl-2-methylpyrimidine deformylase	d__Bacteria;p__Firmicutes_A;c__Clostridia;o__Christensenellales;f__Christensenellaceae;g__;s__	p__Firmicutes_A	7.7e-10	34.8	229	1	[[3, 247]]	1.1e-09	GUT_GENOME111314	MAG	LeChatelierE_2013__MH0217__bin.16	46.87	101822
GUT_GENOME098156_02565	Peptidase T	d__Bacteria;p__Synergistota;c__Synergistia;o__Synergistales;f__Synergistaceae;g__Cloacibacillus;s__Cloacibacillus porcorum	p__Synergistota	1.5e-16	57.4	293	2	[[1, 261], [289, 341]]	1.5e-16	GUT_GENOME098156	MAG	HeQ_2017__SZAXPI029461-129__bin.59	55.35	101609	0.0911577	0.0119297
GUT_GENOME098156_00004	Succinyl-diaminopimelate desuccinylase	d__Bacteria;p__Synergistota;c__Synergistia;o__Synergistales;f__Synergistaceae;g__Cloacibacillus;s__Cloacibacillus porcorum	p__Synergistota	6.4e-13	45.3	255	1	[[1, 281]]	9.3e-13	GUT_GENOME098156	MAG	HeQ_2017__SZAXPI029461-129__bin.59	55.35	101609	0.0911577	0.0119297
GUT_GENOME098156_00813	putative succinyl-diaminopimelate desuccinylase	d__Bacteria;p__Synergistota;c__Synergistia;o__Synergistales;f__Synergistaceae;g__Cloacibacillus;s__Cloacibacillus porcorum	p__Synergistota	4e-08	29.5	240	1	[[36, 307]]	5.9e-08	GUT_GENOME098156	MAG	HeQ_2017__SZAXPI029461-129__bin.59	55.35	101609	0.0911577	0.0119297
GUT_GENOME090571_01077	Acetylornithine deacetylase	d__Bacteria;p__Actinobacteriota;c__Coriobacteriia;o__Coriobacteriales;f__Coriobacteriaceae;g__Collinsella;s__	p__Actinobacteriota	4e-12	41.9	320	1	[[8, 388]]	5.1e-12	GUT_GENOME090571	MAG	ERS608615_52	59.94	101179
GUT_GENOME089665_00382	putative succinyl-diaminopimelate desuccinylase	d__Bacteria;p__Actinobacteriota;c__Coriobacteriia;o__Coriobacteriales;f__Coriobacteriaceae;g__Collinsella;s__	p__Actinobacteriota	3.1e-10	35.9	303	1	[[9, 389]]	3.8e-10	GUT_GENOME089665	MAG	ERS608584_25	60.06	101173
GUT_GENOME081328_00329	putative hydrolase YxeP	d__Bacteria;p__Firmicutes_A;c__Clostridia;o__Oscillospirales;f__Oscillospiraceae;g__;s__	p__Firmicutes_A	2.1e-12	43.5	277	1	[[20, 340]]	4.5e-12	GUT_GENOME081328	MAG	ERS537209_40	55.85	101104
GUT_GENOME084706_00967	Acetylornithine deacetylase	d__Bacteria;p__Firmicutes_A;c__Clostridia;o__Oscillospirales;f__Oscillospiraceae;g__CAG-103;s__	p__Firmicutes_A	3.2e-18	62.2	255	1	[[14, 369]]	3.8e-18	GUT_GENOME084706	MAG	ERS537330_20	61.51	101136	5.10483	0.00897534
GUT_GENOME227824_01045	Acetylornithine deacetylase	d__Bacteria;p__Actinobacteriota;c__Coriobacteriia;o__Coriobacteriales;f__Coriobacteriaceae;g__Collinsella;s__Collinsella sp002232035	p__Actinobacteriota	9.5e-12	40.7	305	1	[[9, 383]]	1.2e-11	GUT_GENOME227824	MAG	SRS294823_27	59.93	103342
GUT_GENOME226927_02710	Peptidase T	d__Bacteria;p__Firmicutes_A;c__Clostridia;o__Lachnospirales;f__Lachnospiraceae;g__GCA-900066135;s__	p__Firmicutes_A	4.1e-16	55.9	242	1	[[3, 273]]	6.2e-16	GUT_GENOME226927	MAG	SRS259531_2	49.44	103335	0.364631	0.00474503
GUT_GENOME229392_01697	Carboxypeptidase G2	d__Bacteria;p__Firmicutes_C;c__Negativicutes;o__Veillonellales;f__Dialisteraceae;g__Dialister;s__	p__Firmicutes_C	7.9e-41	136.8	379	1	[[7, 386]]	1.2e-40	GUT_GENOME229392	MAG	SRS294929_57	52.17	103348
GUT_GENOME229392_01335	Carboxypeptidase G2	d__Bacteria;p__Firmicutes_C;c__Negativicutes;o__Veillonellales;f__Dialisteraceae;g__Dialister;s__	p__Firmicutes_C	5.4e-19	64.8	276	1	[[2, 306]]	7.3e-19	GUT_GENOME229392	MAG	SRS294929_57	52.17	103348
GUT_GENOME229012_02508	Acetylornithine deacetylase	d__Bacteria;p__Bacteroidota;c__Bacteroidia;o__Bacteroidales;f__Bacteroidaceae;g__Prevotella;s__	p__Bacteroidota	3.9e-13	46	270	1	[[26, 310]]	5.4e-13	GUT_GENOME229012	MAG	SRS294902_25	50.44	103346
GUT_GENOME226031_02166	N-acetyl-lysine deacetylase	d__Bacteria;p__Firmicutes_C;c__Negativicutes;o__Veillonellales;f__Megasphaeraceae;g__Megasphaera;s__Megasphaera sp001546855	p__Firmicutes_C	1.5e-10	37.1	245	1	[[7, 335]]	1.9e-10	GUT_GENOME226031	MAG	SRS255876_1	51.03	103331	0.273473	0.0197538
GUT_GENOME231920_01731	Acetylornithine deacetylase	d__Bacteria;p__Proteobacteria;c__Gammaproteobacteria;o__Enterobacterales;f__Enterobacteriaceae;g__Pseudescherichia;s__Pseudescherichia vulneris	p__Proteobacteria	3e-13	47.1	245	1	[[9, 317]]	3.8e-13	GUT_GENOME231920	MAG	SRS372681_2	55.41	103390
GUT_GENOME133538_01236	Acetylornithine deacetylase	d__Bacteria;p__Firmicutes_A;c__Clostridia;o__Lachnospirales;f__Lachnospiraceae;g__Clostridium_Q;s__	p__Firmicutes_A	5.1e-10	35.5	238	1	[[0, 254]]	6.9e-10	GUT_GENOME133538	MAG	NielsenHB_2014__MH0128__bin.1	47.34	102170	0.0911577	0.0128731
GUT_GENOME129025_01958	Carboxypeptidase G2	d__Bacteria;p__Firmicutes_A;c__Clostridia;o__Oscillospirales;f__Oscillospiraceae;g__Oscillibacter;s__	p__Firmicutes_A	1.6e-51	172	383	1	[[0, 383]]	1.9e-51	GUT_GENOME129025	MAG	LiuW_2016__SRR3993035__bin.90	64.59	102114	0.182315	0.00767435
GUT_GENOME129025_01350	Carboxypeptidase G2	d__Bacteria;p__Firmicutes_A;c__Clostridia;o__Oscillospirales;f__Oscillospiraceae;g__Oscillibacter;s__	p__Firmicutes_A	4.1e-46	154.2	396	1	[[2, 378]]	5.2e-46	GUT_GENOME129025	MAG	LiuW_2016__SRR3993035__bin.90	64.59	102114	0.182315	0.00767435
GUT_GENOME136883_00935	putative succinyl-diaminopimelate desuccinylase	d__Bacteria;p__Actinobacteriota;c__Coriobacteriia;o__Coriobacteriales;f__Coriobacteriaceae;g__Collinsella;s__Collinsella sp000434535	p__Actinobacteriota	1.6e-10	36.7	267	1	[[10, 393]]	1.9e-10	GUT_GENOME136883	MAG	NielsenHB_2014__V1_CD31_0__bin.40	59.98	102187
GUT_GENOME112478_01470	Carboxypeptidase G2	d__Bacteria;p__Firmicutes_C;c__Negativicutes;o__Acidaminococcales;f__Acidaminococcaceae;g__Phascolarctobacterium_A;s__	p__Firmicutes_C	1.2e-41	139.4	289	1	[[0, 292]]	1.4e-41	GUT_GENOME112478	MAG	LeChatelierE_2013__MH0322__bin.30	44.18	101858
GUT_GENOME112478_00839	Carboxypeptidase G2	d__Bacteria;p__Firmicutes_C;c__Negativicutes;o__Acidaminococcales;f__Acidaminococcaceae;g__Phascolarctobacterium_A;s__	p__Firmicutes_C	1.9e-40	135.5	379	2	[[3, 256], [251, 407]]	1.1e-33	GUT_GENOME112478	MAG	LeChatelierE_2013__MH0322__bin.30	44.18	101858
GUT_GENOME112478_00277	Carboxypeptidase G2	d__Bacteria;p__Firmicutes_C;c__Negativicutes;o__Acidaminococcales;f__Acidaminococcaceae;g__Phascolarctobacterium_A;s__	p__Firmicutes_C	4.2e-40	134.3	400	1	[[0, 391]]	4.8e-40	GUT_GENOME112478	MAG	LeChatelierE_2013__MH0322__bin.30	44.18	101858
GUT_GENOME112478_01202	Peptidase T	d__Bacteria;p__Firmicutes_C;c__Negativicutes;o__Acidaminococcales;f__Acidaminococcaceae;g__Phascolarctobacterium_A;s__	p__Firmicutes_C	2.3e-26	89	302	1	[[2, 348]]	2.7e-26	GUT_GENOME112478	MAG	LeChatelierE_2013__MH0322__bin.30	44.18	101858
GUT_GENOME147550_00279	Putative succinyl-diaminopimelate desuccinylase DapE	d__Bacteria;p__Actinobacteriota;c__Actinobacteria;o__Actinomycetales;f__Micrococcaceae;g__Kocuria;s__Kocuria rhizophila_B	p__Actinobacteriota	6.3e-11	38.4	340	1	[[3, 363]]	1e-10	GUT_GENOME147550	Isolate	PATRIC_72000_27	70.83	102537
GUT_GENOME147550_02027	Succinyl-diaminopimelate desuccinylase	d__Bacteria;p__Actinobacteriota;c__Actinobacteria;o__Actinomycetales;f__Micrococcaceae;g__Kocuria;s__Kocuria rhizophila_B	p__Actinobacteriota	7.4e-07	25	270	2	[[4, 249], [283, 352]]	0.00045	GUT_GENOME147550	Isolate	PATRIC_72000_27	70.83	102537
GUT_GENOME147612_00207	Succinyl-diaminopimelate desuccinylase	d__Bacteria;p__Bacteroidota;c__Bacteroidia;o__Bacteroidales;f__Bacteroidaceae;g__Paraprevotella;s__Paraprevotella clara	p__Bacteroidota	3.4e-15	53	244	1	[[25, 332]]	4.3e-15	GUT_GENOME147612	Isolate	PATRIC_762968_3	48.26	102540	12.9444	0.00867261
GUT_GENOME096271_01054	Peptidase T	d__Bacteria;p__Firmicutes;c__Bacilli;o__Bacillales_A;f__Planococcaceae;g__Kurthia;s__Kurthia massiliensis	p__Firmicutes	4.6e-16	55.8	264	1	[[1, 309]]	5.7e-16	GUT_GENOME096271	Isolate	GCF_000285555	39.26	101406
GUT_GENOME096490_00217	putative hydrolase YxeP	d__Bacteria;p__Firmicutes_A;c__Clostridia;o__Tissierellales;f__Helcococcaceae;g__Anaerococcus;s__Anaerococcus sp001182725	p__Firmicutes_A	2.7e-08	29.3	239	1	[[97, 352]]	3.8e-08	GUT_GENOME096490	Isolate	GCF_001182725	29.73	101495
GUT_GENOME096480_01374	Carboxypeptidase G2	d__Bacteria;p__Firmicutes_I;c__Bacilli_A;o__Rubeoparvulales;f__Rubeoparvulaceae;g__Rubeoparvulum;s__Rubeoparvulum massiliense	p__Firmicutes_I	9.3e-70	232.6	383	1	[[0, 381]]	1.1e-69	GUT_GENOME096480	Isolate	GCF_001049895	43.76	101491
GUT_GENOME096480_02190	Peptidase T	d__Bacteria;p__Firmicutes_I;c__Bacilli_A;o__Rubeoparvulales;f__Rubeoparvulaceae;g__Rubeoparvulum;s__Rubeoparvulum massiliense	p__Firmicutes_I	5.6e-22	75.1	278	1	[[1, 369]]	7e-22	GUT_GENOME096480	Isolate	GCF_001049895	43.76	101491
GUT_GENOME096480_02191	Peptidase T	d__Bacteria;p__Firmicutes_I;c__Bacilli_A;o__Rubeoparvulales;f__Rubeoparvulaceae;g__Rubeoparvulum;s__Rubeoparvulum massiliense	p__Firmicutes_I	1.3e-21	73.9	281	1	[[1, 336]]	1.7e-21	GUT_GENOME096480	Isolate	GCF_001049895	43.76	101491
GUT_GENOME096273_02317	Carboxypeptidase G2	d__Bacteria;p__Actinobacteriota;c__Actinobacteria;o__Actinomycetales;f__Brevibacteriaceae;g__Brevibacterium;s__Brevibacterium senegalense	p__Actinobacteriota	8.6e-63	209.8	382	1	[[0, 377]]	1.2e-62	GUT_GENOME096273	Isolate	GCF_000285835	69.98	101408
GUT_GENOME096273_02903	Carboxypeptidase G2	d__Bacteria;p__Actinobacteriota;c__Actinobacteria;o__Actinomycetales;f__Brevibacteriaceae;g__Brevibacterium;s__Brevibacterium senegalense	p__Actinobacteriota	1.1e-46	156.6	399	1	[[2, 398]]	1.6e-46	GUT_GENOME096273	Isolate	GCF_000285835	69.98	101408
GUT_GENOME096443_01706	Peptidase T	d__Bacteria;p__Firmicutes;c__Bacilli;o__Bacillales;f__Bacillaceae_A;g__Bacillus_W;s__Bacillus_W rubiinfantis	p__Firmicutes	4.8e-14	49.5	337	1	[[1, 340]]	6.1e-14	GUT_GENOME096443	Isolate	GCF_000752035	39.96	101475
GUT_GENOME096443_00741	N-acetyldiaminopimelate deacetylase	d__Bacteria;p__Firmicutes;c__Bacilli;o__Bacillales;f__Bacillaceae_A;g__Bacillus_W;s__Bacillus_W rubiinfantis	p__Firmicutes	3.2e-09	33.6	244	1	[[91, 355]]	5.1e-09	GUT_GENOME096443	Isolate	GCF_000752035	39.96	101475
GUT_GENOME083197_00245	Carboxypeptidase G2	d__Bacteria;p__Firmicutes_C;c__Negativicutes;o__Acidaminococcales;f__Acidaminococcaceae;g__Phascolarctobacterium_A;s__	p__Firmicutes_C	7.4e-45	149.8	393	1	[[1, 392]]	9.3e-45	GUT_GENOME083197	MAG	ERS537277_52	42.59	101117	0.0911577	0.00611074
GUT_GENOME083197_00414	Carboxypeptidase G2	d__Bacteria;p__Firmicutes_C;c__Negativicutes;o__Acidaminococcales;f__Acidaminococcaceae;g__Phascolarctobacterium_A;s__	p__Firmicutes_C	3.8e-41	137.6	371	2	[[4, 251], [252, 407]]	6.9e-34	GUT_GENOME083197	MAG	ERS537277_52	42.59	101117	0.0911577	0.00611074
GUT_GENOME083197_00556	Peptidase T	d__Bacteria;p__Firmicutes_C;c__Negativicutes;o__Acidaminococcales;f__Acidaminococcaceae;g__Phascolarctobacterium_A;s__	p__Firmicutes_C	7.6e-22	73.9	290	1	[[2, 320]]	9.5e-22	GUT_GENOME083197	MAG	ERS537277_52	42.59	101117	0.0911577	0.00611074
GUT_GENOME083197_00944	Peptidase T	d__Bacteria;p__Firmicutes_C;c__Negativicutes;o__Acidaminococcales;f__Acidaminococcaceae;g__Phascolarctobacterium_A;s__	p__Firmicutes_C	3.9e-19	65	260	1	[[3, 356]]	4.6e-19	GUT_GENOME083197	MAG	ERS537277_52	42.59	101117	0.0911577	0.00611074
GUT_GENOME086831_01317	putative succinyl-diaminopimelate desuccinylase	d__Bacteria;p__Actinobacteriota;c__Coriobacteriia;o__Coriobacteriales;f__Coriobacteriaceae;g__Collinsella;s__Collinsella sp002232035	p__Actinobacteriota	5.2e-11	38.3	329	1	[[8, 394]]	6.6e-11	GUT_GENOME086831	MAG	ERS537407_1	60.11	101152
GUT_GENOME087542_01138	putative succinyl-diaminopimelate desuccinylase	d__Bacteria;p__Actinobacteriota;c__Coriobacteriia;o__Coriobacteriales;f__Coriobacteriaceae;g__Collinsella;s__	p__Actinobacteriota	2.7e-12	42.7	321	1	[[8, 392]]	3.3e-12	GUT_GENOME087542	MAG	ERS608499_12	60.43	101158
GUT_GENOME175577_01726	putative succinyl-diaminopimelate desuccinylase	d__Bacteria;p__Actinobacteriota;c__Coriobacteriia;o__Coriobacteriales;f__Coriobacteriaceae;g__Collinsella;s__	p__Actinobacteriota	3.2e-09	32.5	302	1	[[9, 385]]	3.9e-09	GUT_GENOME175577	MAG	SRR2992884_bin.13	60.25	102869
GUT_GENOME176483_00185	putative hydrolase YxeP	d__Bacteria;p__Firmicutes_A;c__Clostridia;o__Tissierellales;f__Helcococcaceae;g__Anaerococcus;s__	p__Firmicutes_A	1.8e-08	29.6	240	1	[[97, 353]]	2.5e-08	GUT_GENOME176483	MAG	SRR3131714_bin.3	29.08	102887
GUT_GENOME175069_00486	Acetylornithine deacetylase	d__Bacteria;p__Actinobacteriota;c__Coriobacteriia;o__Coriobacteriales;f__Coriobacteriaceae;g__Collinsella;s__	p__Actinobacteriota	6.4e-11	38.1	320	1	[[8, 388]]	8e-11	GUT_GENOME175069	MAG	SRR2912785_bin.42	60.17	102851
GUT_GENOME176893_00599	N-acetyldiaminopimelate deacetylase	d__Bacteria;p__Actinobacteriota;c__Actinobacteria;o__Actinomycetales;f__Actinomycetaceae;g__Winkia;s__Winkia sp002849225	p__Actinobacteriota	1.4e-06	23.9	268	1	[[34, 341]]	1.8e-06	GUT_GENOME176893	MAG	SRR3132023_bin.5	56.71	102894
GUT_GENOME103694_04741	putative succinyl-diaminopimelate desuccinylase	d__Bacteria;p__Firmicutes_A;c__Clostridia;o__Lachnospirales;f__Lachnospiraceae;g__Hungatella_A;s__Hungatella_A hathewayi	p__Firmicutes_A	6.6e-13	46.1	313	1	[[1, 340]]	1.3e-12	GUT_GENOME103694	Isolate	IMG_2513237275	50.02	101688	0.273473	0.00997049
GUT_GENOME098777_02115	Peptidase T	d__Bacteria;p__Firmicutes_A;c__Clostridia;o__Peptostreptococcales;f__Peptostreptococcaceae;g__Terrisporobacter;s__Terrisporobacter othiniensis	p__Firmicutes_A	7.4e-19	65.2	278	1	[[1, 290]]	1e-18	GUT_GENOME098777	MAG	HeQ_2017__SZAXPI029544-123__bin.1	28.64	101623
GUT_GENOME098961_00011	Carboxypeptidase G2	d__Bacteria;p__Firmicutes_C;c__Negativicutes;o__Acidaminococcales;f__Acidaminococcaceae;g__;s__	p__Firmicutes_C	1.5e-50	168.5	379	1	[[3, 375]]	1.8e-50	GUT_GENOME098961	MAG	HeQ_2017__SZAXPI029554-33__bin.51	44.88	101629	0.273473	0.0264163
GUT_GENOME098961_00552	Carboxypeptidase G2	d__Bacteria;p__Firmicutes_C;c__Negativicutes;o__Acidaminococcales;f__Acidaminococcaceae;g__;s__	p__Firmicutes_C	2.8e-42	141.2	370	2	[[4, 251], [254, 406]]	3.7e-34	GUT_GENOME098961	MAG	HeQ_2017__SZAXPI029554-33__bin.51	44.88	101629	0.273473	0.0264163
GUT_GENOME098961_00962	Peptidase T	d__Bacteria;p__Firmicutes_C;c__Negativicutes;o__Acidaminococcales;f__Acidaminococcaceae;g__;s__	p__Firmicutes_C	3.7e-20	68.2	275	1	[[2, 318]]	4.4e-20	GUT_GENOME098961	MAG	HeQ_2017__SZAXPI029554-33__bin.51	44.88	101629	0.273473	0.0264163
GUT_GENOME103712_02248	Carboxypeptidase G2	d__Bacteria;p__Proteobacteria;c__Gammaproteobacteria;o__Enterobacterales;f__Aeromonadaceae;g__Aeromonas;s__Aeromonas veronii_A	p__Proteobacteria	3.2e-51	172.1	378	1	[[4, 379]]	3.9e-51	GUT_GENOME103712	Isolate	IMG_2529292915	58.49	101691
GUT_GENOME102728_00711	Putative succinyl-diaminopimelate desuccinylase DapE	d__Bacteria;p__Firmicutes_A;c__Clostridia;o__Christensenellales;f__CAG-138;g__UBA1685;s__	p__Firmicutes_A	6.6e-14	48.1	331	1	[[38, 377]]	9.2e-14	GUT_GENOME102728	MAG	HMP_2012__SRS049959__bin.65	59.16	101675	0.0911577	0.0283875
GUT_GENOME129224_01727	Carboxypeptidase G2	d__Bacteria;p__Firmicutes_C;c__Negativicutes;o__Acidaminococcales;f__Acidaminococcaceae;g__Acidaminococcus;s__Acidaminococcus sp000437815	p__Firmicutes_C	5e-48	160.4	378	1	[[2, 372]]	6.4e-48	GUT_GENOME129224	MAG	LiuW_2016__SRR3993044__bin.71	56.9	102121	0.182315	0.00673844
GUT_GENOME129224_00047	Carboxypeptidase G2	d__Bacteria;p__Firmicutes_C;c__Negativicutes;o__Acidaminococcales;f__Acidaminococcaceae;g__Acidaminococcus;s__Acidaminococcus sp000437815	p__Firmicutes_C	1.2e-47	159.1	388	1	[[1, 384]]	2.5e-47	GUT_GENOME129224	MAG	LiuW_2016__SRR3993044__bin.71	56.9	102121	0.182315	0.00673844
GUT_GENOME129224_01757	Carboxypeptidase G2	d__Bacteria;p__Firmicutes_C;c__Negativicutes;o__Acidaminococcales;f__Acidaminococcaceae;g__Acidaminococcus;s__Acidaminococcus sp000437815	p__Firmicutes_C	2e-44	148.5	382	1	[[5, 386]]	2.5e-44	GUT_GENOME129224	MAG	LiuW_2016__SRR3993044__bin.71	56.9	102121	0.182315	0.00673844
GUT_GENOME129224_00958	Peptidase T	d__Bacteria;p__Firmicutes_C;c__Negativicutes;o__Acidaminococcales;f__Acidaminococcaceae;g__Acidaminococcus;s__Acidaminococcus sp000437815	p__Firmicutes_C	6.5e-15	51.2	275	1	[[1, 333]]	7.7e-15	GUT_GENOME129224	MAG	LiuW_2016__SRR3993044__bin.71	56.9	102121	0.182315	0.00673844
GUT_GENOME127803_00602	putative succinyl-diaminopimelate desuccinylase	d__Bacteria;p__Actinobacteriota;c__Coriobacteriia;o__Coriobacteriales;f__Coriobacteriaceae;g__Collinsella;s__	p__Actinobacteriota	3.2e-09	32.5	262	1	[[10, 355]]	4.1e-09	GUT_GENOME127803	MAG	LiuW_2016__SRR3992987__bin.74	59.76	102100
GUT_GENOME130417_00193	Carboxypeptidase G2	d__Bacteria;p__Firmicutes_A;c__Clostridia;o__Oscillospirales;f__Butyricicoccaceae;g__Agathobaculum;s__	p__Firmicutes_A	4e-38	128.1	387	1	[[2, 392]]	5.3e-38	GUT_GENOME130417	MAG	LoombaR_2017__SID5016_ish__bin.11	59	102138
GUT_GENOME128124_01267	Peptidase T	d__Bacteria;p__Firmicutes_A;c__Clostridia;o__Oscillospirales;f__Ruminococcaceae;g__Angelakisella;s__	p__Firmicutes_A	2.2e-18	62.6	250	1	[[18, 275]]	3e-18	GUT_GENOME128124	MAG	LiuW_2016__SRR3993000__bin.27	55.05	102102
GUT_GENOME103713_00576	Carboxypeptidase G2	d__Bacteria;p__Proteobacteria;c__Gammaproteobacteria;o__Enterobacterales;f__Aeromonadaceae;g__Aeromonas;s__Aeromonas dhakensis	p__Proteobacteria	1.4e-49	166.8	380	1	[[6, 379]]	1.7e-49	GUT_GENOME103713	Isolate	IMG_2529292917	61.55	101692
GUT_GENOME100276_01897	N-acetyl-lysine deacetylase	d__Archaea;p__Halobacterota;c__Halobacteria;o__Halobacteriales;f__Haloferacaceae;g__Haloferax;s__Haloferax massiliensis	p__Halobacterota	1.6e-08	31.2	257	1	[[19, 353]]	2e-08	GUT_GENOME100276	Isolate	H_massiliense_CSTE01	66.34	101639
GUT_GENOME099453_01539	putative succinyl-diaminopimelate desuccinylase	d__Bacteria;p__Actinobacteriota;c__Coriobacteriia;o__Coriobacteriales;f__Coriobacteriaceae;g__Collinsella;s__Collinsella sp002232035	p__Actinobacteriota	4.7e-10	35.2	312	1	[[9, 392]]	6.1e-10	GUT_GENOME099453	MAG	HeQ_2017__SZAXPI029572-87__bin.21	60.07	101634
GUT_GENOME231257_02722	Carboxypeptidase G2	d__Bacteria;p__Proteobacteria;c__Gammaproteobacteria;o__Enterobacterales;f__Enterobacteriaceae;g__Enterobacter_D;s__Enterobacter_D kobei	p__Proteobacteria	4.9e-56	188.1	376	1	[[1, 370]]	5.9e-56	GUT_GENOME231257	MAG	SRS311495_7	55.23	103360
GUT_GENOME231257_01562	Acetylornithine deacetylase	d__Bacteria;p__Proteobacteria;c__Gammaproteobacteria;o__Enterobacterales;f__Enterobacteriaceae;g__Enterobacter_D;s__Enterobacter_D kobei	p__Proteobacteria	1.6e-14	51.2	228	1	[[1, 281]]	2e-14	GUT_GENOME231257	MAG	SRS311495_7	55.23	103360
GUT_GENOME225852_00458	Succinyl-diaminopimelate desuccinylase	d__Bacteria;p__Firmicutes;c__Bacilli;o__Lactobacillales;f__Lactobacillaceae;g__Leuconostoc;s__Leuconostoc lactis_B	p__Firmicutes	1.8e-08	29.8	254	2	[[1, 201], [299, 418]]	1.3e-07	GUT_GENOME225852	MAG	SRS255102_30	43.25	103325
GUT_GENOME230476_00212	Carboxypeptidase G2	d__Bacteria;p__Proteobacteria;c__Gammaproteobacteria;o__Burkholderiales;f__Burkholderiaceae;g__Parasutterella;s__	p__Proteobacteria	3.7e-34	115	274	1	[[2, 370]]	6.6e-34	GUT_GENOME230476	MAG	SRS294991_82	48.71	103352
GUT_GENOME230476_01764	Succinyl-diaminopimelate desuccinylase	d__Bacteria;p__Proteobacteria;c__Gammaproteobacteria;o__Burkholderiales;f__Burkholderiaceae;g__Parasutterella;s__	p__Proteobacteria	2.9e-20	69.2	294	1	[[1, 299]]	3.6e-20	GUT_GENOME230476	MAG	SRS294991_82	48.71	103352
GUT_GENOME230476_02262	N-acetyl-lysine deacetylase	d__Bacteria;p__Proteobacteria;c__Gammaproteobacteria;o__Burkholderiales;f__Burkholderiaceae;g__Parasutterella;s__	p__Proteobacteria	4.1e-15	52.3	275	1	[[58, 365]]	6e-15	GUT_GENOME230476	MAG	SRS294991_82	48.71	103352
GUT_GENOME230476_01749	N-formyl-4-amino-5-aminomethyl-2-methylpyrimidine deformylase	d__Bacteria;p__Proteobacteria;c__Gammaproteobacteria;o__Burkholderiales;f__Burkholderiaceae;g__Parasutterella;s__	p__Proteobacteria	7e-11	38.3	268	1	[[3, 337]]	1e-10	GUT_GENOME230476	MAG	SRS294991_82	48.71	103352
GUT_GENOME231247_04587	Acetylornithine deacetylase	d__Bacteria;p__Proteobacteria;c__Gammaproteobacteria;o__Enterobacterales;f__Enterobacteriaceae;g__Kluyvera;s__Kluyvera ascorbata	p__Proteobacteria	2.6e-14	50.6	232	1	[[0, 268]]	3.2e-14	GUT_GENOME231247	MAG	SRS311462_6	54.22	103358
GUT_GENOME231247_04513	Acetylornithine deacetylase	d__Bacteria;p__Proteobacteria;c__Gammaproteobacteria;o__Enterobacterales;f__Enterobacteriaceae;g__Kluyvera;s__Kluyvera ascorbata	p__Proteobacteria	6.6e-08	29.5	246	1	[[43, 311]]	9.4e-08	GUT_GENOME231247	MAG	SRS311462_6	54.22	103358
GUT_GENOME131908_00553	Succinyl-diaminopimelate desuccinylase	d__Bacteria;p__Firmicutes_A;c__Clostridia;o__Oscillospirales;f__Ruminococcaceae;g__Ruthenibacterium;s__	p__Firmicutes_A	4.7e-12	42.1	242	2	[[1, 217], [306, 440]]	2.8e-08	GUT_GENOME131908	MAG	LouisS_2016__AS63_3__bin.7	58.9	102155	0.182315	0.0145862
GUT_GENOME131908_02032	Putative succinyl-diaminopimelate desuccinylase DapE	d__Bacteria;p__Firmicutes_A;c__Clostridia;o__Oscillospirales;f__Ruminococcaceae;g__Ruthenibacterium;s__	p__Firmicutes_A	7.5e-09	31.5	311	1	[[45, 379]]	1e-08	GUT_GENOME131908	MAG	LouisS_2016__AS63_3__bin.7	58.9	102155	0.182315	0.0145862
GUT_GENOME128145_00803	Hippurate hydrolase	d__Bacteria;p__Firmicutes_A;c__Clostridia;o__Oscillospirales;f__Oscillospiraceae;g__Lawsonibacter;s__	p__Firmicutes_A	5.4e-09	31.4	238	1	[[36, 325]]	8e-09	GUT_GENOME128145	MAG	LiuW_2016__SRR3993001__bin.23	63.56	102103
GUT_GENOME128581_01363	Putative succinyl-diaminopimelate desuccinylase DapE	d__Bacteria;p__Bacteroidota;c__Bacteroidia;o__Bacteroidales;f__UBA932;g__UBA1232;s__	p__Bacteroidota	7.7e-12	41.1	252	1	[[60, 331]]	1.3e-11	GUT_GENOME128581	MAG	LiuW_2016__SRR3993017__bin.14	40.48	102109
GUT_GENOME231626_01624	Acetylornithine deacetylase	d__Bacteria;p__Proteobacteria;c__Gammaproteobacteria;o__Enterobacterales;f__Enterobacteriaceae;g__Pantoea;s__Pantoea anthophila	p__Proteobacteria	3.1e-10	37	238	1	[[4, 291]]	4.8e-10	GUT_GENOME231626	MAG	SRS371567_3	56.86	103379
GUT_GENOME222296_00392	N-acetyl-lysine deacetylase	d__Bacteria;p__Firmicutes_A;c__Clostridia;o__Christensenellales;f__Christensenellaceae;g__QANA01;s__	p__Firmicutes_A	1.1e-10	36.4	309	1	[[58, 375]]	1.5e-10	GUT_GENOME222296	MAG	SRS1596868_153	59.99	103304
GUT_GENOME227600_00786	putative succinyl-diaminopimelate desuccinylase	d__Bacteria;p__Actinobacteriota;c__Coriobacteriia;o__Coriobacteriales;f__Coriobacteriaceae;g__Collinsella;s__	p__Actinobacteriota	1.3e-10	37	254	1	[[11, 386]]	1.4e-10	GUT_GENOME227600	MAG	SRS290676_12	59.97	103341
GUT_GENOME232032_02884	N-formyl-4-amino-5-aminomethyl-2-methylpyrimidine deformylase	d__Bacteria;p__Proteobacteria;c__Gammaproteobacteria;o__Enterobacterales;f__Enterobacteriaceae;g__RIT-PI-d;s__	p__Proteobacteria	2.1e-21	74	236	1	[[6, 343]]	2.5e-21	GUT_GENOME232032	MAG	SRS372979_2	53.81	103395
GUT_GENOME232032_03296	Acetylornithine deacetylase	d__Bacteria;p__Proteobacteria;c__Gammaproteobacteria;o__Enterobacterales;f__Enterobacteriaceae;g__RIT-PI-d;s__	p__Proteobacteria	1.9e-14	51	234	1	[[0, 281]]	2.3e-14	GUT_GENOME232032	MAG	SRS372979_2	53.81	103395
GUT_GENOME232032_02900	Acetylornithine deacetylase	d__Bacteria;p__Proteobacteria;c__Gammaproteobacteria;o__Enterobacterales;f__Enterobacteriaceae;g__RIT-PI-d;s__	p__Proteobacteria	4.3e-13	46.6	294	1	[[3, 334]]	5.5e-13	GUT_GENOME232032	MAG	SRS372979_2	53.81	103395
GUT_GENOME232032_02813	p-aminobenzoyl-glutamate hydrolase subunit B	d__Bacteria;p__Proteobacteria;c__Gammaproteobacteria;o__Enterobacterales;f__Enterobacteriaceae;g__RIT-PI-d;s__	p__Proteobacteria	1.7e-07	28.1	234	2	[[19, 167], [92, 338]]	9.7e-07	GUT_GENOME232032	MAG	SRS372979_2	53.81	103395
GUT_GENOME000575_01950	Peptidase T	d__Bacteria;p__Firmicutes;c__Bacilli;o__Exiguobacterales;f__Exiguobacteraceae;g__Exiguobacterium_A;s__	p__Firmicutes	9.6e-19	64.6	331	1	[[1, 369]]	1.2e-18	GUT_GENOME000575	Isolate	20298_3_28	47	100116
GUT_GENOME000575_02417	putative succinyl-diaminopimelate desuccinylase	d__Bacteria;p__Firmicutes;c__Bacilli;o__Exiguobacterales;f__Exiguobacteraceae;g__Exiguobacterium_A;s__	p__Firmicutes	8.8e-16	54.9	283	1	[[10, 339]]	1.1e-15	GUT_GENOME000575	Isolate	20298_3_28	47	100116
GUT_GENOME000659_00402	Acetylornithine deacetylase	d__Bacteria;p__Firmicutes_A;c__Clostridia;o__Lachnospirales;f__Lachnospiraceae;g__CAG-56;s__CAG-56 sp900066615	p__Firmicutes_A	4.1e-12	42.8	237	1	[[7, 275]]	5.5e-12	GUT_GENOME000659	Isolate	21673_4_37	43.68	100140	26.8004	0.00978347
GUT_GENOME000931_05286	Carboxypeptidase G2	d__Bacteria;p__Firmicutes_A;c__Clostridia;o__Lachnospirales;f__Lachnospiraceae;g__Clostridium_M;s__Clostridium_M lavalense	p__Firmicutes_A	2.1e-41	140.2	383	1	[[5, 392]]	2.8e-41	GUT_GENOME000931	Isolate	AF18-27	55.42	100172
GUT_GENOME000931_00912	Carboxypeptidase G2	d__Bacteria;p__Firmicutes_A;c__Clostridia;o__Lachnospirales;f__Lachnospiraceae;g__Clostridium_M;s__Clostridium_M lavalense	p__Firmicutes_A	1.7e-39	133.9	372	1	[[2, 374]]	2.7e-39	GUT_GENOME000931	Isolate	AF18-27	55.42	100172
GUT_GENOME000931_04690	Peptidase T	d__Bacteria;p__Firmicutes_A;c__Clostridia;o__Lachnospirales;f__Lachnospiraceae;g__Clostridium_M;s__Clostridium_M lavalense	p__Firmicutes_A	3.6e-13	47.1	228	1	[[16, 317]]	4.3e-13	GUT_GENOME000931	Isolate	AF18-27	55.42	100172
GUT_GENOME000931_01240	Acetylornithine deacetylase	d__Bacteria;p__Firmicutes_A;c__Clostridia;o__Lachnospirales;f__Lachnospiraceae;g__Clostridium_M;s__Clostridium_M lavalense	p__Firmicutes_A	6.7e-11	39.6	271	1	[[123, 426]]	9.5e-11	GUT_GENOME000931	Isolate	AF18-27	55.42	100172
GUT_GENOME000931_02071	N-acetyl-lysine deacetylase	d__Bacteria;p__Firmicutes_A;c__Clostridia;o__Lachnospirales;f__Lachnospiraceae;g__Clostridium_M;s__Clostridium_M lavalense	p__Firmicutes_A	4.2e-07	27.1	309	1	[[64, 380]]	5.6e-07	GUT_GENOME000931	Isolate	AF18-27	55.42	100172
GUT_GENOME000534_01491	Peptidase T	d__Bacteria;p__Firmicutes_A;c__Clostridia;o__Peptostreptococcales;f__Peptostreptococcaceae;g__Terrisporobacter;s__	p__Firmicutes_A	6.3e-23	78.7	379	1	[[1, 370]]	7.9e-23	GUT_GENOME000534	Isolate	20298_2_47	28.37	100102
GUT_GENOME000534_02313	Peptidase T	d__Bacteria;p__Firmicutes_A;c__Clostridia;o__Peptostreptococcales;f__Peptostreptococcaceae;g__Terrisporobacter;s__	p__Firmicutes_A	3.7e-18	63	273	1	[[1, 279]]	5e-18	GUT_GENOME000534	Isolate	20298_2_47	28.37	100102
GUT_GENOME258629_00696	Peptidase T	d__Bacteria;p__Firmicutes;c__Bacilli;o__Bacillales;f__Bacillaceae_A;g__FJAT-27916;s__FJAT-27916 sp001183965	p__Firmicutes	1.6e-15	53.6	343	1	[[1, 350]]	2e-15	GUT_GENOME258629	MAG	XieH_2016__YSZC12003_37265R1__bin.108	43.54	104176
GUT_GENOME000852_02161	Carboxypeptidase G2	d__Bacteria;p__Firmicutes_A;c__Clostridia;o__Lachnospirales;f__Lachnospiraceae;g__Dorea;s__Dorea sp900086625	p__Firmicutes_A	5.2e-61	204.2	383	1	[[2, 382]]	6.3e-61	GUT_GENOME000852	Isolate	AF15-17LB	49.54	100165
GUT_GENOME000852_03575	putative succinyl-diaminopimelate desuccinylase	d__Bacteria;p__Firmicutes_A;c__Clostridia;o__Lachnospirales;f__Lachnospiraceae;g__Dorea;s__Dorea sp900086625	p__Firmicutes_A	1.5e-08	31.2	241	1	[[24, 300]]	2e-08	GUT_GENOME000852	Isolate	AF15-17LB	49.54	100165
GUT_GENOME000852_03578	Acetylornithine deacetylase	d__Bacteria;p__Firmicutes_A;c__Clostridia;o__Lachnospirales;f__Lachnospiraceae;g__Dorea;s__Dorea sp900086625	p__Firmicutes_A	2.1e-06	24.2	234	1	[[2, 259]]	3.3e-06	GUT_GENOME000852	Isolate	AF15-17LB	49.54	100165
GUT_GENOME000582_01617	Acetylornithine deacetylase	d__Bacteria;p__Firmicutes_A;c__Clostridia;o__Lachnospirales;f__Lachnospiraceae;g__;s__	p__Firmicutes_A	3e-17	59.6	282	1	[[3, 336]]	4e-17	GUT_GENOME000582	Isolate	20298_3_34	49.05	100118
GUT_GENOME222447_00765	Peptidase T	d__Bacteria;p__Firmicutes_A;c__Clostridia;o__Oscillospirales;f__Oscillospiraceae;g__Lawsonibacter;s__	p__Firmicutes_A	8.2e-20	67.1	323	2	[[1, 270], [254, 340]]	9.7e-20	GUT_GENOME222447	MAG	SRS1596871_52	54.05	103309
GUT_GENOME222123_01623	Peptidase T	d__Bacteria;p__Actinobacteriota;c__Coriobacteriia;o__Coriobacteriales;f__Eggerthellaceae;g__Senegalimassilia;s__	p__Actinobacteriota	1e-06	24.4	244	1	[[2, 272]]	1.6e-06	GUT_GENOME222123	MAG	SRS1596861_110	62.28	103303
GUT_GENOME230902_03595	Succinyl-diaminopimelate desuccinylase	d__Bacteria;p__Firmicutes_A;c__Clostridia;o__Lachnospirales;f__Lachnospiraceae;g__Lachnoclostridium;s__Lachnoclostridium phytofermentans_A	p__Firmicutes_A	5.3e-09	33.1	240	1	[[20, 289]]	7.1e-09	GUT_GENOME230902	MAG	SRS295012_3	35.24	103355
GUT_GENOME225966_00692	putative succinyl-diaminopimelate desuccinylase	d__Bacteria;p__Actinobacteriota;c__Coriobacteriia;o__Coriobacteriales;f__Coriobacteriaceae;g__Collinsella;s__	p__Actinobacteriota	3e-10	35.6	257	1	[[11, 386]]	3.5e-10	GUT_GENOME225966	MAG	SRS255708_22	60.2	103328
GUT_GENOME096373_01609	Carboxypeptidase G2	d__Bacteria;p__Firmicutes;c__Bacilli;o__Staphylococcales;f__Staphylococcaceae;g__Staphylococcus;s__Staphylococcus schleiferi	p__Firmicutes	3.6e-38	128.2	313	1	[[42, 375]]	4.3e-38	GUT_GENOME096373	Isolate	GCF_000411275	35.98	101437
GUT_GENOME096373_00882	Peptidase T	d__Bacteria;p__Firmicutes;c__Bacilli;o__Staphylococcales;f__Staphylococcaceae;g__Staphylococcus;s__Staphylococcus schleiferi	p__Firmicutes	1.9e-12	43.4	269	1	[[1, 310]]	2.4e-12	GUT_GENOME096373	Isolate	GCF_000411275	35.98	101437
GUT_GENOME096454_00702	putative succinyl-diaminopimelate desuccinylase	d__Bacteria;p__Actinobacteriota;c__Coriobacteriia;o__Coriobacteriales;f__Coriobacteriaceae;g__Collinsella;s__Collinsella sp000763055	p__Actinobacteriota	4.1e-11	38.8	301	1	[[9, 388]]	4.9e-11	GUT_GENOME096454	Isolate	GCF_000763055	60.2	101478
GUT_GENOME096491_00684	Carboxypeptidase G2	d__Bacteria;p__Firmicutes_A;c__Clostridia;o__Lachnospirales;f__Lachnospiraceae;g__Dorea;s__Dorea sp001185345	p__Firmicutes_A	8.3e-62	206.8	384	1	[[2, 382]]	1e-61	GUT_GENOME096491	Isolate	GCF_001185345	48.6	101496
GUT_GENOME096491_01731	putative succinyl-diaminopimelate desuccinylase	d__Bacteria;p__Firmicutes_A;c__Clostridia;o__Lachnospirales;f__Lachnospiraceae;g__Dorea;s__Dorea sp001185345	p__Firmicutes_A	3.1e-10	36.8	243	1	[[24, 303]]	4.2e-10	GUT_GENOME096491	Isolate	GCF_001185345	48.6	101496
GUT_GENOME096491_01728	Acetylornithine deacetylase	d__Bacteria;p__Firmicutes_A;c__Clostridia;o__Lachnospirales;f__Lachnospiraceae;g__Dorea;s__Dorea sp001185345	p__Firmicutes_A	2.4e-06	24	233	1	[[2, 262]]	3.7e-06	GUT_GENOME096491	Isolate	GCF_001185345	48.6	101496
GUT_GENOME096270_02447	Carboxypeptidase G2	d__Bacteria;p__Firmicutes;c__Bacilli;o__Bacillales;f__Bacillaceae_L;g__Bacillus_Q;s__Bacillus_Q timonensis	p__Firmicutes	1.3e-60	203.2	382	1	[[3, 382]]	1.7e-60	GUT_GENOME096270	Isolate	GCF_000285535	37.28	101405
GUT_GENOME096270_00203	putative succinyl-diaminopimelate desuccinylase	d__Bacteria;p__Firmicutes;c__Bacilli;o__Bacillales;f__Bacillaceae_L;g__Bacillus_Q;s__Bacillus_Q timonensis	p__Firmicutes	2.6e-16	57.1	244	1	[[43, 321]]	3.8e-16	GUT_GENOME096270	Isolate	GCF_000285535	37.28	101405
GUT_GENOME096270_04246	Peptidase T	d__Bacteria;p__Firmicutes;c__Bacilli;o__Bacillales;f__Bacillaceae_L;g__Bacillus_Q;s__Bacillus_Q timonensis	p__Firmicutes	5.9e-16	56	384	1	[[1, 372]]	6.7e-16	GUT_GENOME096270	Isolate	GCF_000285535	37.28	101405
GUT_GENOME096270_01031	N-acetyldiaminopimelate deacetylase	d__Bacteria;p__Firmicutes;c__Bacilli;o__Bacillales;f__Bacillaceae_L;g__Bacillus_Q;s__Bacillus_Q timonensis	p__Firmicutes	4.8e-06	23.3	235	1	[[42, 354]]	6e-06	GUT_GENOME096270	Isolate	GCF_000285535	37.28	101405
GUT_GENOME096439_01050	Carboxypeptidase G2	d__Bacteria;p__Firmicutes;c__Bacilli;o__Bacillales;f__Amphibacillaceae;g__Oceanobacillus;s__Oceanobacillus jeddahense	p__Firmicutes	5.3e-46	155.2	350	1	[[16, 379]]	6.2e-46	GUT_GENOME096439	Isolate	GCF_000750635	37.25	101472
GUT_GENOME096439_01029	putative succinyl-diaminopimelate desuccinylase	d__Bacteria;p__Firmicutes;c__Bacilli;o__Bacillales;f__Amphibacillaceae;g__Oceanobacillus;s__Oceanobacillus jeddahense	p__Firmicutes	8.6e-16	55.6	254	1	[[2, 310]]	1.1e-15	GUT_GENOME096439	Isolate	GCF_000750635	37.25	101472
GUT_GENOME096439_03024	Peptidase T	d__Bacteria;p__Firmicutes;c__Bacilli;o__Bacillales;f__Amphibacillaceae;g__Oceanobacillus;s__Oceanobacillus jeddahense	p__Firmicutes	8.9e-15	52.3	276	1	[[1, 329]]	1.1e-14	GUT_GENOME096439	Isolate	GCF_000750635	37.25	101472
GUT_GENOME096439_00186	putative succinyl-diaminopimelate desuccinylase	d__Bacteria;p__Firmicutes;c__Bacilli;o__Bacillales;f__Amphibacillaceae;g__Oceanobacillus;s__Oceanobacillus jeddahense	p__Firmicutes	1.9e-12	44.6	258	1	[[24, 348]]	2.3e-12	GUT_GENOME096439	Isolate	GCF_000750635	37.25	101472
GUT_GENOME096439_04301	N-acetyl-lysine deacetylase	d__Bacteria;p__Firmicutes;c__Bacilli;o__Bacillales;f__Amphibacillaceae;g__Oceanobacillus;s__Oceanobacillus jeddahense	p__Firmicutes	5.8e-10	36.4	246	1	[[55, 370]]	7.4e-10	GUT_GENOME096439	Isolate	GCF_000750635	37.25	101472
GUT_GENOME096387_01803	Succinyl-diaminopimelate desuccinylase	d__Bacteria;p__Actinobacteriota;c__Actinobacteria;o__Actinomycetales;f__Dermabacteraceae;g__Dermabacter;s__Dermabacter hominis	p__Actinobacteriota	7.1e-06	21.7	235	1	[[4, 243]]	1.1e-05	GUT_GENOME096387	Isolate	GCF_000413375	62.78	101448
GUT_GENOME100308_00947	Acetylornithine deacetylase	d__Bacteria;p__Actinobacteriota;c__Coriobacteriia;o__Coriobacteriales;f__Coriobacteriaceae;g__Collinsella;s__	p__Actinobacteriota	9.4e-08	27.5	317	1	[[8, 388]]	1.2e-07	GUT_GENOME100308	MAG	HMP_2012__SRS011084__bin.34	60.09	101642
GUT_GENOME103721_02619	putative succinyl-diaminopimelate desuccinylase	d__Bacteria;p__Firmicutes;c__Bacilli;o__Lactobacillales;f__Enterococcaceae;g__Enterococcus;s__Enterococcus faecalis	p__Firmicutes	6.9e-15	51.7	242	1	[[27, 362]]	7.9e-15	GUT_GENOME103721	Isolate	IMG_2540341058	37.72	101694	0.0911577	0.00978027
GUT_GENOME103721_00175	putative hydrolase YxeP	d__Bacteria;p__Firmicutes;c__Bacilli;o__Lactobacillales;f__Enterococcaceae;g__Enterococcus;s__Enterococcus faecalis	p__Firmicutes	9.4e-06	21.6	260	1	[[36, 361]]	1.2e-05	GUT_GENOME103721	Isolate	IMG_2540341058	37.72	101694	0.0911577	0.00978027
GUT_GENOME098045_00067	putative succinyl-diaminopimelate desuccinylase	d__Bacteria;p__Firmicutes_A;c__Clostridia;o__Lachnospirales;f__Lachnospiraceae;g__Dorea;s__Dorea sp900240315	p__Firmicutes_A	8.5e-13	44.5	303	1	[[67, 384]]	1.1e-12	GUT_GENOME098045	MAG	HeQ_2017__RSZAXPI003105-143__bin.33	43.5	101607
GUT_GENOME103718_02970	putative metallohydrolase	d__Archaea;p__Halobacterota;c__Halobacteria;o__Halobacteriales;f__Haloferacaceae;g__Halorubrum;s__Halorubrum lipolyticum	p__Halobacterota	1.1e-12	44.8	250	2	[[55, 260], [297, 430]]	4.6e-09	GUT_GENOME103718	Isolate	IMG_2534682115	68.01	101693
GUT_GENOME126127_00185	putative succinyl-diaminopimelate desuccinylase	d__Bacteria;p__Actinobacteriota;c__Coriobacteriia;o__Coriobacteriales;f__Coriobacteriaceae;g__Collinsella;s__Collinsella aerofaciens_F	p__Actinobacteriota	1.1e-09	34	265	1	[[10, 388]]	1.3e-09	GUT_GENOME126127	MAG	LiSS_2016__FAT_012-22-42-0__bin.36	60.14	102076
GUT_GENOME127509_00114	Acetylornithine deacetylase	d__Bacteria;p__Firmicutes_A;c__Clostridia;o__Oscillospirales;f__Oscillospiraceae;g__CAG-83;s__	p__Firmicutes_A	6.5e-14	47.5	265	1	[[3, 293]]	9.1e-14	GUT_GENOME127509	MAG	LiuW_2016__SRR3992978__bin.9	62.72	102095
GUT_GENOME123764_01158	putative succinyl-diaminopimelate desuccinylase	d__Bacteria;p__Actinobacteriota;c__Coriobacteriia;o__Coriobacteriales;f__Coriobacteriaceae;g__Collinsella;s__	p__Actinobacteriota	3.5e-10	35.4	313	1	[[8, 383]]	4.2e-10	GUT_GENOME123764	MAG	LiJ_2017__H2M514911__bin.17	61.02	102043
GUT_GENOME002826_01702	putative succinyl-diaminopimelate desuccinylase	d__Bacteria;p__Actinobacteriota;c__Coriobacteriia;o__Coriobacteriales;f__Coriobacteriaceae;g__Collinsella;s__	p__Actinobacteriota	3.1e-12	42.4	320	1	[[8, 388]]	3.8e-12	GUT_GENOME002826	MAG	BackhedF_2015__SID181_4M__bin.2	60.17	100290
GUT_GENOME001779_00950	Acetylornithine deacetylase	d__Bacteria;p__Firmicutes_A;c__Clostridia;o__Lachnospirales;f__Lachnospiraceae;g__UBA9502;s__UBA9502 sp003506385	p__Firmicutes_A	1.4e-20	70.8	302	1	[[9, 372]]	1.7e-20	GUT_GENOME001779	Isolate	AM42-4	47.98	100274
GUT_GENOME035196_01669	putative succinyl-diaminopimelate desuccinylase	d__Bacteria;p__Actinobacteriota;c__Coriobacteriia;o__Coriobacteriales;f__Coriobacteriaceae;g__Collinsella;s__	p__Actinobacteriota	8.3e-12	41	273	1	[[9, 392]]	9.8e-12	GUT_GENOME035196	MAG	ERR1190833_bin.48	60.26	100826
GUT_GENOME018848_01873	Acetylornithine deacetylase	d__Bacteria;p__Bacteroidota;c__Bacteroidia;o__Bacteroidales;f__Muribaculaceae;g__CAG-873;s__	p__Bacteroidota	1e-12	44.1	246	1	[[5, 287]]	1.3e-12	GUT_GENOME018848	MAG	CM_madagascar__A90_04_1FE__bin.56	52.18	100619
GUT_GENOME022845_01720	N-acetyl-lysine deacetylase	d__Bacteria;p__Firmicutes_A;c__Clostridia;o__Lachnospirales;f__Lachnospiraceae;g__Hungatella_A;s__	p__Firmicutes_A	4.8e-14	48.5	273	2	[[46, 289], [325, 440]]	1.4e-13	GUT_GENOME022845	MAG	CosteaPI_2017__SID713A039-11-90-0__bin.58	47.18	100680
GUT_GENOME018700_01034	Acetylornithine deacetylase	d__Bacteria;p__Actinobacteriota;c__Coriobacteriia;o__Coriobacteriales;f__Atopobiaceae;g__Libanicoccus;s__Libanicoccus massiliensis	p__Actinobacteriota	7.2e-13	44.3	320	1	[[7, 362]]	9.2e-13	GUT_GENOME018700	MAG	CM_madagascar__A83_02_1FE__bin.66	66.07	100614
GUT_GENOME096489_00849	Carboxypeptidase G2	d__Bacteria;p__Proteobacteria;c__Gammaproteobacteria;o__Burkholderiales;f__Burkholderiaceae;g__Dakarella;s__Dakarella massiliensis	p__Proteobacteria	2.1e-49	165.2	371	1	[[2, 370]]	2.8e-49	GUT_GENOME096489	Isolate	GCF_001182045	56.98	101494	0.638104	0.0108556
GUT_GENOME096489_01408	Carboxypeptidase G2	d__Bacteria;p__Proteobacteria;c__Gammaproteobacteria;o__Burkholderiales;f__Burkholderiaceae;g__Dakarella;s__Dakarella massiliensis	p__Proteobacteria	2.3e-48	161.8	374	1	[[1, 383]]	2.9e-48	GUT_GENOME096489	Isolate	GCF_001182045	56.98	101494	0.638104	0.0108556
GUT_GENOME096489_00146	Carboxypeptidase G2	d__Bacteria;p__Proteobacteria;c__Gammaproteobacteria;o__Burkholderiales;f__Burkholderiaceae;g__Dakarella;s__Dakarella massiliensis	p__Proteobacteria	1.3e-43	146.1	373	1	[[2, 369]]	1.7e-43	GUT_GENOME096489	Isolate	GCF_001182045	56.98	101494	0.638104	0.0108556
GUT_GENOME096489_01407	Carboxypeptidase G2	d__Bacteria;p__Proteobacteria;c__Gammaproteobacteria;o__Burkholderiales;f__Burkholderiaceae;g__Dakarella;s__Dakarella massiliensis	p__Proteobacteria	1.3e-36	123.1	381	1	[[1, 383]]	1.6e-36	GUT_GENOME096489	Isolate	GCF_001182045	56.98	101494	0.638104	0.0108556
GUT_GENOME096272_01424	Peptidase T	d__Bacteria;p__Firmicutes_A;c__Clostridia;o__Clostridiales;f__Clostridiaceae;g__Clostridium_J;s__Clostridium_J senegalense	p__Firmicutes_A	5.2e-18	62.5	369	1	[[1, 368]]	6.3e-18	GUT_GENOME096272	Isolate	GCF_000285575	26.87	101407
GUT_GENOME096272_01478	putative succinyl-diaminopimelate desuccinylase	d__Bacteria;p__Firmicutes_A;c__Clostridia;o__Clostridiales;f__Clostridiaceae;g__Clostridium_J;s__Clostridium_J senegalense	p__Firmicutes_A	1.8e-14	50.8	319	1	[[27, 349]]	3.2e-14	GUT_GENOME096272	Isolate	GCF_000285575	26.87	101407
GUT_GENOME096435_02000	Peptidase T	d__Bacteria;p__Firmicutes;c__Bacilli;o__Bacillales;f__Amphibacillaceae;g__Virgibacillus;s__Virgibacillus massiliensis	p__Firmicutes	1.3e-17	61.3	387	1	[[0, 373]]	1.6e-17	GUT_GENOME096435	Isolate	GCF_000723585	36.87	101470
GUT_GENOME096435_02981	N-acetyldiaminopimelate deacetylase	d__Bacteria;p__Firmicutes;c__Bacilli;o__Bacillales;f__Amphibacillaceae;g__Virgibacillus;s__Virgibacillus massiliensis	p__Firmicutes	1.9e-09	34.5	260	1	[[35, 338]]	2.5e-09	GUT_GENOME096435	Isolate	GCF_000723585	36.87	101470
GUT_GENOME096435_02633	putative succinyl-diaminopimelate desuccinylase	d__Bacteria;p__Firmicutes;c__Bacilli;o__Bacillales;f__Amphibacillaceae;g__Virgibacillus;s__Virgibacillus massiliensis	p__Firmicutes	2.6e-08	30.7	286	1	[[9, 360]]	3.7e-08	GUT_GENOME096435	Isolate	GCF_000723585	36.87	101470
GUT_GENOME096435_01054	putative hydrolase YxeP	d__Bacteria;p__Firmicutes;c__Bacilli;o__Bacillales;f__Amphibacillaceae;g__Virgibacillus;s__Virgibacillus massiliensis	p__Firmicutes	5.7e-07	26.3	231	1	[[91, 350]]	7.6e-07	GUT_GENOME096435	Isolate	GCF_000723585	36.87	101470
GUT_GENOME096390_02184	Peptidase T	d__Bacteria;p__Firmicutes_I;c__Bacilli_A;o__Paenibacillales;f__Paenibacillaceae;g__Paenibacillus_P;s__Paenibacillus_P antibioticophila	p__Firmicutes_I	2.1e-18	64.2	274	1	[[2, 319]]	2.7e-18	GUT_GENOME096390	Isolate	GCF_000455265	49.1	101451
GUT_GENOME096285_00249	putative succinyl-diaminopimelate desuccinylase	d__Bacteria;p__Firmicutes_A;c__Clostridia;o__Tissierellales;f__Peptoniphilaceae;g__Peptoniphilus_E;s__Peptoniphilus_E obesi	p__Firmicutes_A	3.4e-11	38.9	243	1	[[8, 333]]	4.1e-11	GUT_GENOME096285	Isolate	GCF_000311865	30.15	101414
GUT_GENOME096285_00573	Succinyl-diaminopimelate desuccinylase	d__Bacteria;p__Firmicutes_A;c__Clostridia;o__Tissierellales;f__Peptoniphilaceae;g__Peptoniphilus_E;s__Peptoniphilus_E obesi	p__Firmicutes_A	6.1e-10	34.7	270	2	[[1, 232], [234, 318]]	9.4e-07	GUT_GENOME096285	Isolate	GCF_000311865	30.15	101414
GUT_GENOME149444_01479	Carboxypeptidase G2	d__Bacteria;p__Firmicutes_C;c__Negativicutes;o__Veillonellales;f__Dialisteraceae;g__Dialister;s__	p__Firmicutes_C	3.2e-49	164.1	395	1	[[1, 383]]	3.9e-49	GUT_GENOME149444	MAG	QinJ_2012__CON-099__bin.23	49.91	102562	0.182315	0.0123287
GUT_GENOME149444_01472	Carboxypeptidase G2	d__Bacteria;p__Firmicutes_C;c__Negativicutes;o__Veillonellales;f__Dialisteraceae;g__Dialister;s__	p__Firmicutes_C	2.9e-48	160.9	386	1	[[1, 384]]	3.6e-48	GUT_GENOME149444	MAG	QinJ_2012__CON-099__bin.23	49.91	102562	0.182315	0.0123287
GUT_GENOME149444_01104	Peptidase T	d__Bacteria;p__Firmicutes_C;c__Negativicutes;o__Veillonellales;f__Dialisteraceae;g__Dialister;s__	p__Firmicutes_C	3.4e-15	52	254	1	[[17, 355]]	4.2e-15	GUT_GENOME149444	MAG	QinJ_2012__CON-099__bin.23	49.91	102562	0.182315	0.0123287
GUT_GENOME147146_03455	Carboxypeptidase G2	d__Bacteria;p__Proteobacteria;c__Gammaproteobacteria;o__Enterobacterales;f__Aeromonadaceae;g__Aeromonas;s__Aeromonas caviae	p__Proteobacteria	4e-50	168.4	379	1	[[4, 379]]	5.1e-50	GUT_GENOME147146	Isolate	PATRIC_648_78	61.77	102527
GUT_GENOME146009_02277	Carboxypeptidase G2	d__Bacteria;p__Proteobacteria;c__Gammaproteobacteria;o__Enterobacterales;f__Enterobacteriaceae;g__Pluralibacter;s__Pluralibacter gergoviae	p__Proteobacteria	3e-58	195.5	381	1	[[0, 370]]	3.4e-58	GUT_GENOME146009	Isolate	PATRIC_61647_65	58.97	102520
GUT_GENOME146009_00686	Acetylornithine deacetylase	d__Bacteria;p__Proteobacteria;c__Gammaproteobacteria;o__Enterobacterales;f__Enterobacteriaceae;g__Pluralibacter;s__Pluralibacter gergoviae	p__Proteobacteria	3.4e-14	50.3	228	1	[[1, 265]]	4.3e-14	GUT_GENOME146009	Isolate	PATRIC_61647_65	58.97	102520
GUT_GENOME146009_02395	Acetylornithine deacetylase	d__Bacteria;p__Proteobacteria;c__Gammaproteobacteria;o__Enterobacterales;f__Enterobacteriaceae;g__Pluralibacter;s__Pluralibacter gergoviae	p__Proteobacteria	1.5e-08	31.7	237	1	[[33, 294]]	2.5e-08	GUT_GENOME146009	Isolate	PATRIC_61647_65	58.97	102520
GUT_GENOME148915_01570	putative succinyl-diaminopimelate desuccinylase	d__Bacteria;p__Actinobacteriota;c__Coriobacteriia;o__Coriobacteriales;f__Coriobacteriaceae;g__Collinsella;s__	p__Actinobacteriota	9e-10	34.3	332	1	[[8, 393]]	1.1e-09	GUT_GENOME148915	MAG	QinJ_2012__CON-067__bin.28	59.88	102557
GUT_GENOME213384_04768	Acetylornithine deacetylase	d__Bacteria;p__Proteobacteria;c__Gammaproteobacteria;o__Pseudomonadales;f__Pseudomonadaceae;g__Pseudomonas_E;s__Pseudomonas_E extremaustralis	p__Proteobacteria	1.8e-06	25	236	1	[[5, 289]]	2.6e-06	GUT_GENOME213384	MAG	SRS013638_13	60.78	103208
GUT_GENOME218782_01772	putative succinyl-diaminopimelate desuccinylase	d__Bacteria;p__Actinobacteriota;c__Coriobacteriia;o__Coriobacteriales;f__Coriobacteriaceae;g__Collinsella;s__	p__Actinobacteriota	4.1e-11	38.7	320	1	[[9, 387]]	5e-11	GUT_GENOME218782	MAG	SRS1170850_15	60.18	103275
GUT_GENOME095287_03170	Acetylornithine deacetylase	d__Bacteria;p__Proteobacteria;c__Alphaproteobacteria;o__Rhizobiales;f__Beijerinckiaceae;g__Methylobacterium;s__Methylobacterium sp002778835	p__Proteobacteria	2.2e-10	37.5	308	1	[[18, 370]]	2.7e-10	GUT_GENOME095287	MAG	FerrettiP_2018__CA_C10006IS2087FE_t2M15__bin.5	70.94	101265
GUT_GENOME095287_03328	Succinyl-diaminopimelate desuccinylase	d__Bacteria;p__Proteobacteria;c__Alphaproteobacteria;o__Rhizobiales;f__Beijerinckiaceae;g__Methylobacterium;s__Methylobacterium sp002778835	p__Proteobacteria	1.2e-09	35.1	372	1	[[1, 378]]	1.6e-09	GUT_GENOME095287	MAG	FerrettiP_2018__CA_C10006IS2087FE_t2M15__bin.5	70.94	101265
GUT_GENOME267277_00925	Acetylornithine deacetylase	d__Bacteria;p__Actinobacteriota;c__Coriobacteriia;o__Coriobacteriales;f__Coriobacteriaceae;g__Collinsella;s__Collinsella aerofaciens_F	p__Actinobacteriota	8e-14	47.7	321	1	[[8, 389]]	1e-13	GUT_GENOME267277	MAG	ZeeviD_2015__PNP_Main_17__bin.35	60.19	104328
GUT_GENOME270248_01541	putative succinyl-diaminopimelate desuccinylase	d__Bacteria;p__Actinobacteriota;c__Coriobacteriia;o__Coriobacteriales;f__Coriobacteriaceae;g__Collinsella;s__	p__Actinobacteriota	1.6e-11	40	319	1	[[8, 390]]	2e-11	GUT_GENOME270248	MAG	ZeeviD_2015__PNP_Main_29__bin.7	60.13	104367
GUT_GENOME270927_01435	putative succinyl-diaminopimelate desuccinylase	d__Bacteria;p__Actinobacteriota;c__Coriobacteriia;o__Coriobacteriales;f__Coriobacteriaceae;g__Collinsella;s__	p__Actinobacteriota	3.7e-11	38.7	306	1	[[9, 386]]	4.6e-11	GUT_GENOME270927	MAG	ZeeviD_2015__PNP_Main_333__bin.21	60.18	104383
GUT_GENOME244162_01398	Carboxypeptidase G2	d__Bacteria;p__Actinobacteriota;c__Actinobacteria;o__Actinomycetales;f__Brevibacteriaceae;g__Brevibacterium;s__	p__Actinobacteriota	6.1e-53	176.8	314	1	[[54, 380]]	7.4e-53	GUT_GENOME244162	MAG	VincentC_2016__MM088__bin.30	57.68	103792
GUT_GENOME244162_01634	Carboxypeptidase G2	d__Bacteria;p__Actinobacteriota;c__Actinobacteria;o__Actinomycetales;f__Brevibacteriaceae;g__Brevibacterium;s__	p__Actinobacteriota	2.2e-49	165	312	1	[[8, 376]]	2.7e-49	GUT_GENOME244162	MAG	VincentC_2016__MM088__bin.30	57.68	103792
GUT_GENOME244234_00266	Acetylornithine deacetylase	d__Bacteria;p__Actinobacteriota;c__Coriobacteriia;o__Coriobacteriales;f__Coriobacteriaceae;g__Collinsella;s__	p__Actinobacteriota	1.1e-11	40.6	305	1	[[8, 392]]	1.3e-11	GUT_GENOME244234	MAG	VincentC_2016__MM094.2__bin.1	60.24	103798
GUT_GENOME239789_01924	Putative succinyl-diaminopimelate desuccinylase DapE	d__Bacteria;p__Bacteroidota;c__Bacteroidia;o__Bacteroidales;f__Tannerellaceae;g__Parabacteroides;s__	p__Bacteroidota	2.3e-08	31	235	1	[[21, 301]]	2.9e-08	GUT_GENOME239789	Isolate	TM07-1AC	43.87	103701
GUT_GENOME176020_01129	Acetylornithine deacetylase	d__Bacteria;p__Bacteroidota;c__Bacteroidia;o__Bacteroidales;f__Bacteroidaceae;g__Prevotella;s__	p__Bacteroidota	1.3e-10	37.2	232	1	[[26, 288]]	1.7e-10	GUT_GENOME176020	MAG	SRR2992899_bin.3	49.76	102877
GUT_GENOME269020_00127	Acetylornithine deacetylase	d__Bacteria;p__Actinobacteriota;c__Coriobacteriia;o__Coriobacteriales;f__Coriobacteriaceae;g__Collinsella;s__	p__Actinobacteriota	5.1e-12	41.7	320	1	[[8, 387]]	6.4e-12	GUT_GENOME269020	MAG	ZeeviD_2015__PNP_Main_248__bin.2	59.88	104349
GUT_GENOME170612_01082	putative succinyl-diaminopimelate desuccinylase	d__Bacteria;p__Actinobacteriota;c__Coriobacteriia;o__Coriobacteriales;f__Coriobacteriaceae;g__Collinsella;s__	p__Actinobacteriota	2.3e-11	39.1	275	1	[[3, 336]]	2.9e-11	GUT_GENOME170612	MAG	SRR1761710_bin.1	60.49	102808
GUT_GENOME095515_00883	putative succinyl-diaminopimelate desuccinylase	d__Bacteria;p__Firmicutes_A;c__Clostridia;o__Eubacteriales;f__Eubacteriaceae;g__Eubacterium;s__Eubacterium limosum	p__Firmicutes_A	1.3e-08	31.4	241	1	[[6, 317]]	1.8e-08	GUT_GENOME095515	MAG	FerrettiP_2018__CA_C10024IS2415FE_t3M15__bin.11	47.64	101276
GUT_GENOME095515_02925	putative succinyl-diaminopimelate desuccinylase	d__Bacteria;p__Firmicutes_A;c__Clostridia;o__Eubacteriales;f__Eubacteriaceae;g__Eubacterium;s__Eubacterium limosum	p__Firmicutes_A	2.3e-07	27.4	230	2	[[39, 244], [340, 409]]	1.1e-06	GUT_GENOME095515	MAG	FerrettiP_2018__CA_C10024IS2415FE_t3M15__bin.11	47.64	101276
GUT_GENOME213666_00476	Peptidase T	d__Bacteria;p__Firmicutes_A;c__Clostridia;o__Lachnospirales;f__;g__;s__	p__Firmicutes_A	9.6e-11	39	274	1	[[1, 275]]	1.4e-10	GUT_GENOME213666	MAG	SRS014923_50	48.99	103214
GUT_GENOME218245_01794	N-acetyl-lysine deacetylase	d__Bacteria;p__Firmicutes_A;c__Clostridia;o__Oscillospirales;f__Oscillospiraceae;g__CAG-110;s__	p__Firmicutes_A	2.8e-15	52.6	318	1	[[39, 373]]	3.7e-15	GUT_GENOME218245	MAG	SRS1170750_11	53.74	103269
GUT_GENOME221057_00537	Peptidase T	d__Bacteria;p__Firmicutes_C;c__Negativicutes;o__Selenomonadales;f__Selenomonadaceae;g__Selenomonas_A;s__	p__Firmicutes_C	3.4e-20	68.8	274	1	[[2, 281]]	5e-20	GUT_GENOME221057	MAG	SRS1596820_39	50.52	103294
GUT_GENOME213359_00139	Carboxypeptidase G2	d__Bacteria;p__Firmicutes_A;c__Clostridia;o__Oscillospirales;f__CAG-382;g__UBA1206;s__	p__Firmicutes_A	1.3e-34	116.2	378	1	[[4, 380]]	1.7e-34	GUT_GENOME213359	MAG	SRS013476_60	46.75	103207
GUT_GENOME244005_00922	Carboxypeptidase G2	d__Bacteria;p__Firmicutes_A;c__Clostridia;o__Lachnospirales;f__Lachnospiraceae;g__GCA-900066575;s__GCA-900066575 sp002160765	p__Firmicutes_A	6.2e-13	45.4	262	1	[[1, 273]]	9.1e-13	GUT_GENOME244005	MAG	VincentC_2016__MM070.2__bin.18	51.11	103783
GUT_GENOME239815_00472	putative succinyl-diaminopimelate desuccinylase	d__Bacteria;p__Actinobacteriota;c__Coriobacteriia;o__Coriobacteriales;f__Coriobacteriaceae;g__Collinsella;s__	p__Actinobacteriota	1.8e-08	30	253	1	[[12, 394]]	2.3e-08	GUT_GENOME239815	Isolate	TM10-22	59.66	103703
GUT_GENOME097394_01422	putative succinyl-diaminopimelate desuccinylase	d__Bacteria;p__Actinobacteriota;c__Coriobacteriia;o__Coriobacteriales;f__Coriobacteriaceae;g__Collinsella;s__	p__Actinobacteriota	3.9e-10	35.5	318	1	[[8, 390]]	4.8e-10	GUT_GENOME097394	MAG	GeversD_2014__SKSTL0004__bin.28	60.22	101579
GUT_GENOME096543_02119	Carboxypeptidase G2	d__Bacteria;p__Proteobacteria;c__Gammaproteobacteria;o__Enterobacterales;f__Enterobacteriaceae;g__Enterobacter_A;s__Enterobacter_A timonensis	p__Proteobacteria	1.4e-57	192.9	378	1	[[0, 370]]	1.6e-57	GUT_GENOME096543	Isolate	GCF_900021175	56.81	101536
GUT_GENOME097626_00686	putative succinyl-diaminopimelate desuccinylase	d__Bacteria;p__Actinobacteriota;c__Coriobacteriia;o__Coriobacteriales;f__Coriobacteriaceae;g__Collinsella;s__	p__Actinobacteriota	2.1e-12	42.4	320	1	[[8, 388]]	2.6e-12	GUT_GENOME097626	MAG	HanniganGD_2017__MG100189__bin.1	60.08	101584
GUT_GENOME159708_01708	Carboxypeptidase G2	d__Bacteria;p__Firmicutes_A;c__Clostridia;o__Oscillospirales;f__Oscillospiraceae;g__;s__	p__Firmicutes_A	2e-39	132.5	385	1	[[1, 389]]	2.5e-39	GUT_GENOME159708	MAG	RaymondF_2016__P9E90__bin.4	60.32	102727
GUT_GENOME159708_01307	Carboxypeptidase G2	d__Bacteria;p__Firmicutes_A;c__Clostridia;o__Oscillospirales;f__Oscillospiraceae;g__;s__	p__Firmicutes_A	4.3e-39	131.4	395	1	[[2, 392]]	6.1e-39	GUT_GENOME159708	MAG	RaymondF_2016__P9E90__bin.4	60.32	102727
GUT_GENOME154813_01005	Carboxypeptidase G2	d__Bacteria;p__Proteobacteria;c__Gammaproteobacteria;o__Burkholderiales;f__Burkholderiaceae;g__CAG-521;s__	p__Proteobacteria	5.3e-50	166.5	378	1	[[1, 372]]	7.5e-50	GUT_GENOME154813	MAG	QinN_2014__HD-7__bin.17	47.02	102611
GUT_GENOME157290_00876	Carboxypeptidase G2	d__Bacteria;p__Firmicutes_C;c__Negativicutes;o__Acidaminococcales;f__Acidaminococcaceae;g__Phascolarctobacterium_A;s__	p__Firmicutes_C	2.8e-48	161.3	385	1	[[5, 387]]	3.5e-48	GUT_GENOME157290	MAG	RampelliS_2015__H18__bin.7	47.48	102659
GUT_GENOME157290_00002	Carboxypeptidase G2	d__Bacteria;p__Firmicutes_C;c__Negativicutes;o__Acidaminococcales;f__Acidaminococcaceae;g__Phascolarctobacterium_A;s__	p__Firmicutes_C	1.7e-46	155.5	399	1	[[0, 391]]	2e-46	GUT_GENOME157290	MAG	RampelliS_2015__H18__bin.7	47.48	102659
GUT_GENOME157290_01103	Carboxypeptidase G2	d__Bacteria;p__Firmicutes_C;c__Negativicutes;o__Acidaminococcales;f__Acidaminococcaceae;g__Phascolarctobacterium_A;s__	p__Firmicutes_C	3.9e-43	144.4	370	2	[[2, 252], [252, 407]]	3.4e-36	GUT_GENOME157290	MAG	RampelliS_2015__H18__bin.7	47.48	102659
GUT_GENOME157290_01129	Peptidase T	d__Bacteria;p__Firmicutes_C;c__Negativicutes;o__Acidaminococcales;f__Acidaminococcaceae;g__Phascolarctobacterium_A;s__	p__Firmicutes_C	8.6e-24	80.6	308	1	[[1, 353]]	1e-23	GUT_GENOME157290	MAG	RampelliS_2015__H18__bin.7	47.48	102659
GUT_GENOME157213_00582	Acetylornithine deacetylase	d__Bacteria;p__Bacteroidota;c__Bacteroidia;o__Bacteroidales;f__Bacteroidaceae;g__Prevotella;s__Prevotella sp002251295	p__Bacteroidota	3.9e-13	45.8	243	1	[[11, 352]]	4.5e-13	GUT_GENOME157213	MAG	RampelliS_2015__H15__bin.11	46.02	102653
GUT_GENOME173857_00283	putative hydrolase YxeP	d__Bacteria;p__Firmicutes_A;c__Clostridia;o__Oscillospirales;f__Oscillospiraceae;g__;s__	p__Firmicutes_A	2e-09	33.6	282	1	[[30, 348]]	2.8e-09	GUT_GENOME173857	MAG	SRR2155371_bin.11	57.24	102840	0.0911577	0.00611686
GUT_GENOME172942_00555	Succinyl-diaminopimelate desuccinylase	d__Bacteria;p__Firmicutes_A;c__Clostridia;o__Lachnospirales;f__Lachnospiraceae;g__;s__	p__Firmicutes_A	1.3e-10	37.8	236	1	[[12, 290]]	1.8e-10	GUT_GENOME172942	MAG	SRR2047833_bin.18	47.94	102837
GUT_GENOME176464_02806	Acetylornithine deacetylase	d__Bacteria;p__Proteobacteria;c__Gammaproteobacteria;o__Pseudomonadales;f__Pseudomonadaceae;g__Pseudomonas_E;s__Pseudomonas_E aeruginosa	p__Proteobacteria	2.4e-09	33.6	246	1	[[28, 319]]	4.5e-09	GUT_GENOME176464	MAG	SRR3131704_bin.1	62.96	102885
GUT_GENOME175115_01435	putative succinyl-diaminopimelate desuccinylase	d__Bacteria;p__Actinobacteriota;c__Coriobacteriia;o__Coriobacteriales;f__Coriobacteriaceae;g__Collinsella;s__	p__Actinobacteriota	1.3e-11	40.2	321	1	[[8, 392]]	1.7e-11	GUT_GENOME175115	MAG	SRR2912788_bin.13	60.11	102853
GUT_GENOME171593_01685	putative succinyl-diaminopimelate desuccinylase	d__Bacteria;p__Actinobacteriota;c__Coriobacteriia;o__Coriobacteriales;f__Coriobacteriaceae;g__Collinsella;s__	p__Actinobacteriota	4.5e-11	38.5	321	1	[[8, 386]]	5.6e-11	GUT_GENOME171593	MAG	SRR1793408_bin.4	60.29	102824
GUT_GENOME175234_01262	Acetylornithine deacetylase	d__Bacteria;p__Actinobacteriota;c__Coriobacteriia;o__Coriobacteriales;f__Coriobacteriaceae;g__Collinsella;s__	p__Actinobacteriota	1.8e-11	39.9	306	1	[[8, 388]]	2.2e-11	GUT_GENOME175234	MAG	SRR2912795_bin.15	59.86	102859
GUT_GENOME244103_00495	putative succinyl-diaminopimelate desuccinylase	d__Bacteria;p__Synergistota;c__Synergistia;o__Synergistales;f__Dethiosulfovibrionaceae;g__Pyramidobacter;s__	p__Synergistota	1.1e-14	50.4	251	1	[[52, 338]]	1.4e-14	GUT_GENOME244103	MAG	VincentC_2016__MM083.5__bin.17	57.77	103788
GUT_GENOME244103_00158	Peptidase T	d__Bacteria;p__Synergistota;c__Synergistia;o__Synergistales;f__Dethiosulfovibrionaceae;g__Pyramidobacter;s__	p__Synergistota	8.4e-13	44.2	264	1	[[2, 283]]	1.1e-12	GUT_GENOME244103	MAG	VincentC_2016__MM083.5__bin.17	57.77	103788
GUT_GENOME244103_01509	N-acetyl-lysine deacetylase	d__Bacteria;p__Synergistota;c__Synergistia;o__Synergistales;f__Dethiosulfovibrionaceae;g__Pyramidobacter;s__	p__Synergistota	3.6e-06	22.3	321	1	[[36, 376]]	5.1e-06	GUT_GENOME244103	MAG	VincentC_2016__MM083.5__bin.17	57.77	103788
GUT_GENOME243592_00997	Succinyl-diaminopimelate desuccinylase	d__Bacteria;p__Actinobacteriota;c__Actinobacteria;o__Mycobacteriales;f__Mycobacteriaceae;g__Corynebacterium;s__Corynebacterium aurimucosum_C	p__Actinobacteriota	2.2e-12	43.2	244	2	[[0, 227], [305, 363]]	3.6e-12	GUT_GENOME243592	MAG	VincentC_2016__MM041.1__bin.11	61.6	103762
GUT_GENOME242840_02695	putative hydrolase YxeP	d__Bacteria;p__Firmicutes_A;c__Clostridia;o__Lachnospirales;f__Lachnospiraceae;g__Faecalicatena;s__	p__Firmicutes_A	8.3e-06	22	254	1	[[19, 282]]	1.4e-05	GUT_GENOME242840	MAG	VatanenT_2016__G80593__bin.8	44.22	103715
GUT_GENOME244174_00006	Carboxypeptidase G2	d__Bacteria;p__Firmicutes_C;c__Negativicutes;o__Veillonellales;f__Megasphaeraceae;g__Anaeroglobus;s__Anaeroglobus sp900240295	p__Firmicutes_C	1.1e-33	113	235	1	[[13, 390]]	1.3e-33	GUT_GENOME244174	MAG	VincentC_2016__MM089.1__bin.23	50.93	103795
GUT_GENOME266946_00753	putative succinyl-diaminopimelate desuccinylase	d__Bacteria;p__Actinobacteriota;c__Coriobacteriia;o__Coriobacteriales;f__Coriobacteriaceae;g__Collinsella;s__	p__Actinobacteriota	5e-12	41.6	319	1	[[9, 363]]	6.6e-12	GUT_GENOME266946	MAG	ZeeviD_2015__PNP_Main_167__bin.31	60.11	104325
GUT_GENOME269614_01479	putative succinyl-diaminopimelate desuccinylase	d__Bacteria;p__Actinobacteriota;c__Coriobacteriia;o__Coriobacteriales;f__Coriobacteriaceae;g__Collinsella;s__	p__Actinobacteriota	9e-11	37.5	327	1	[[8, 393]]	1.1e-10	GUT_GENOME269614	MAG	ZeeviD_2015__PNP_Main_273__bin.6	60.24	104358
GUT_GENOME282223_01215	putative succinyl-diaminopimelate desuccinylase	d__Bacteria;p__Actinobacteriota;c__Coriobacteriia;o__Coriobacteriales;f__Coriobacteriaceae;g__Collinsella;s__	p__Actinobacteriota	1.2e-11	40.5	320	1	[[8, 385]]	1.4e-11	GUT_GENOME282223	MAG	ZellerG_2014__CCIS07648107ST-4-0__bin.45	60	104542
GUT_GENOME283282_00382	Succinyl-diaminopimelate desuccinylase	d__Bacteria;p__Spirochaetota;c__Spirochaetia;o__Treponematales;f__Treponemataceae;g__Treponema_D;s__Treponema_D berlinense	p__Spirochaetota	2.8e-13	46	242	1	[[55, 335]]	5.4e-13	GUT_GENOME283282	MAG	ZellerG_2014__CCIS35100175ST-4-0__bin.37	39.56	104570
GUT_GENOME283050_02788	putative succinyl-diaminopimelate desuccinylase	d__Bacteria;p__Firmicutes_A;c__Clostridia;o__Lachnospirales;f__Lachnospiraceae;g__Faecalicatena;s__	p__Firmicutes_A	2.2e-14	50.4	274	1	[[40, 380]]	3.2e-14	GUT_GENOME283050	MAG	ZellerG_2014__CCIS27927933ST-4-0__bin.9	45.52	104558
GUT_GENOME283050_02793	Acetylornithine deacetylase	d__Bacteria;p__Firmicutes_A;c__Clostridia;o__Lachnospirales;f__Lachnospiraceae;g__Faecalicatena;s__	p__Firmicutes_A	6e-06	22.6	234	1	[[5, 253]]	1e-05	GUT_GENOME283050	MAG	ZellerG_2014__CCIS27927933ST-4-0__bin.9	45.52	104558
GUT_GENOME282114_00878	Peptidase T	d__Bacteria;p__Firmicutes;c__Bacilli;o__Bacillales_A;f__Planococcaceae;g__Lysinibacillus_C;s__	p__Firmicutes	2.6e-17	60.1	290	1	[[1, 326]]	3.2e-17	GUT_GENOME282114	MAG	ZellerG_2014__CCIS06260551ST-3-0__bin.21	34.91	104541
GUT_GENOME281513_01479	N-acetyl-lysine deacetylase	d__Bacteria;p__Bacteroidota;c__Bacteroidia;o__Bacteroidales;f__Rikenellaceae;g__Alistipes;s__	p__Bacteroidota	4e-10	35.5	242	1	[[27, 295]]	5.4e-10	GUT_GENOME281513	MAG	ZeeviD_2015__PNP_Validation_6__bin.5	61.71	104536	0.273473	0.0194205
GUT_GENOME139200_01147	Carboxypeptidase G2	d__Bacteria;p__Firmicutes_A;c__Clostridia;o__Lachnospirales;f__Lachnospiraceae;g__CAG-81;s__	p__Firmicutes_A	1.8e-53	178.1	377	1	[[2, 374]]	3.2e-53	GUT_GENOME139200	MAG	Obregon-TitoAJ_2015__NO03__bin.41	47.86	102226
GUT_GENOME139200_00390	Carboxypeptidase G2	d__Bacteria;p__Firmicutes_A;c__Clostridia;o__Lachnospirales;f__Lachnospiraceae;g__CAG-81;s__	p__Firmicutes_A	1.7e-21	72.7	273	1	[[1, 345]]	2e-21	GUT_GENOME139200	MAG	Obregon-TitoAJ_2015__NO03__bin.41	47.86	102226
GUT_GENOME139128_00063	Carboxypeptidase G2	d__Bacteria;p__Firmicutes_C;c__Negativicutes;o__Veillonellales;f__Dialisteraceae;g__Dialister;s__	p__Firmicutes_C	1.8e-49	165.2	390	1	[[0, 383]]	2e-49	GUT_GENOME139128	MAG	Obregon-TitoAJ_2015__HCO70__bin.8	52.26	102222	0.0911577	0.0172439
GUT_GENOME139128_00064	Carboxypeptidase G2	d__Bacteria;p__Firmicutes_C;c__Negativicutes;o__Veillonellales;f__Dialisteraceae;g__Dialister;s__	p__Firmicutes_C	5.1e-45	150.5	388	1	[[2, 384]]	6.4e-45	GUT_GENOME139128	MAG	Obregon-TitoAJ_2015__HCO70__bin.8	52.26	102222	0.0911577	0.0172439
GUT_GENOME139128_00061	Carboxypeptidase G2	d__Bacteria;p__Firmicutes_C;c__Negativicutes;o__Veillonellales;f__Dialisteraceae;g__Dialister;s__	p__Firmicutes_C	1e-39	133	399	1	[[0, 391]]	1.2e-39	GUT_GENOME139128	MAG	Obregon-TitoAJ_2015__HCO70__bin.8	52.26	102222	0.0911577	0.0172439
GUT_GENOME139128_00598	Peptidase T	d__Bacteria;p__Firmicutes_C;c__Negativicutes;o__Veillonellales;f__Dialisteraceae;g__Dialister;s__	p__Firmicutes_C	2.1e-20	69.3	297	1	[[0, 348]]	2.4e-20	GUT_GENOME139128	MAG	Obregon-TitoAJ_2015__HCO70__bin.8	52.26	102222	0.0911577	0.0172439
GUT_GENOME139128_01770	Carboxypeptidase G2	d__Bacteria;p__Firmicutes_C;c__Negativicutes;o__Veillonellales;f__Dialisteraceae;g__Dialister;s__	p__Firmicutes_C	1.3e-19	66.8	252	1	[[5, 330]]	1.5e-19	GUT_GENOME139128	MAG	Obregon-TitoAJ_2015__HCO70__bin.8	52.26	102222	0.0911577	0.0172439
GUT_GENOME139859_01063	N-formyl-4-amino-5-aminomethyl-2-methylpyrimidine deformylase	d__Bacteria;p__Firmicutes_A;c__Clostridia;o__Oscillospirales;f__Oscillospiraceae;g__CAG-110;s__	p__Firmicutes_A	6e-07	25	235	1	[[24, 294]]	8.2e-07	GUT_GENOME139859	MAG	Obregon-TitoAJ_2015__SM32__bin.15	58.77	102255
GUT_GENOME175166_00801	Acetylornithine deacetylase	d__Bacteria;p__Actinobacteriota;c__Coriobacteriia;o__Coriobacteriales;f__Coriobacteriaceae;g__Collinsella;s__	p__Actinobacteriota	1.3e-09	33	320	1	[[8, 392]]	1.6e-09	GUT_GENOME175166	MAG	SRR2912790_bin.34	60.38	102856
GUT_GENOME175384_01612	putative succinyl-diaminopimelate desuccinylase	d__Bacteria;p__Actinobacteriota;c__Coriobacteriia;o__Coriobacteriales;f__Coriobacteriaceae;g__Collinsella;s__	p__Actinobacteriota	4.4e-10	35.2	307	1	[[9, 392]]	5.5e-10	GUT_GENOME175384	MAG	SRR2912803_bin.37	60.01	102864
GUT_GENOME271377_01598	putative succinyl-diaminopimelate desuccinylase	d__Bacteria;p__Actinobacteriota;c__Coriobacteriia;o__Coriobacteriales;f__Coriobacteriaceae;g__Collinsella;s__	p__Actinobacteriota	1.1e-09	33.9	265	1	[[10, 388]]	1.3e-09	GUT_GENOME271377	MAG	ZeeviD_2015__PNP_Main_354__bin.34	60.17	104387
GUT_GENOME269084_00805	Peptidase T	d__Bacteria;p__Firmicutes_C;c__Negativicutes;o__Veillonellales;f__Veillonellaceae;g__Veillonella_A;s__Veillonella_A sp000431435	p__Firmicutes_C	7.2e-21	71.1	272	1	[[2, 369]]	8e-21	GUT_GENOME269084	MAG	ZeeviD_2015__PNP_Main_251__bin.15	42.76	104351
GUT_GENOME269084_01222	Carboxypeptidase G2	d__Bacteria;p__Firmicutes_C;c__Negativicutes;o__Veillonellales;f__Veillonellaceae;g__Veillonella_A;s__Veillonella_A sp000431435	p__Firmicutes_C	1.9e-19	66.4	304	1	[[62, 391]]	2.2e-19	GUT_GENOME269084	MAG	ZeeviD_2015__PNP_Main_251__bin.15	42.76	104351
GUT_GENOME269084_00164	putative hydrolase YxeP	d__Bacteria;p__Firmicutes_C;c__Negativicutes;o__Veillonellales;f__Veillonellaceae;g__Veillonella_A;s__Veillonella_A sp000431435	p__Firmicutes_C	3.3e-06	22.7	234	1	[[53, 375]]	5.3e-06	GUT_GENOME269084	MAG	ZeeviD_2015__PNP_Main_251__bin.15	42.76	104351
GUT_GENOME265882_01097	putative succinyl-diaminopimelate desuccinylase	d__Bacteria;p__Actinobacteriota;c__Coriobacteriia;o__Coriobacteriales;f__Coriobacteriaceae;g__Collinsella;s__Collinsella aerofaciens_F	p__Actinobacteriota	1e-13	47.1	321	1	[[8, 389]]	1.3e-13	GUT_GENOME265882	MAG	ZeeviD_2015__PNP_Main_127__bin.69	60.34	104307
GUT_GENOME080486_00966	Acetylornithine deacetylase	d__Bacteria;p__Actinobacteriota;c__Coriobacteriia;o__Coriobacteriales;f__Coriobacteriaceae;g__Collinsella;s__Collinsella aerofaciens_F	p__Actinobacteriota	1.8e-10	36.5	302	1	[[9, 388]]	2.3e-10	GUT_GENOME080486	MAG	ERS473415_1	60.13	101096
GUT_GENOME065321_00473	putative succinyl-diaminopimelate desuccinylase	d__Bacteria;p__Firmicutes_A;c__Clostridia;o__Lachnospirales;f__Lachnospiraceae;g__Tyzzerella;s__	p__Firmicutes_A	7.1e-09	31.6	233	1	[[24, 293]]	9.2e-09	GUT_GENOME065321	MAG	ERR688607_bin.10	38.5	101005
GUT_GENOME075185_01335	putative succinyl-diaminopimelate desuccinylase	d__Bacteria;p__Actinobacteriota;c__Coriobacteriia;o__Coriobacteriales;f__Coriobacteriaceae;g__Collinsella;s__	p__Actinobacteriota	2.9e-11	39.1	265	1	[[10, 388]]	3.4e-11	GUT_GENOME075185	MAG	ERS396528_68	59.85	101061
GUT_GENOME096573_01920	Succinyl-diaminopimelate desuccinylase	d__Bacteria;p__Bacteroidota;c__Bacteroidia;o__Bacteroidales;f__Rikenellaceae;g__Alistipes;s__Alistipes timonensis	p__Bacteroidota	1.4e-10	37.5	245	1	[[5, 301]]	1.7e-10	GUT_GENOME096573	Isolate	GCF_900107675	58.84	101562	0.273473	0.00677049
GUT_GENOME096879_03533	Peptidase T	d__Bacteria;p__Firmicutes_A;c__Clostridia;o__Lachnospirales;f__Lachnospiraceae;g__Hungatella;s__Hungatella sp000526575	p__Firmicutes_A	7.8e-16	55.5	256	1	[[5, 346]]	9.4e-16	GUT_GENOME096879	MAG	GeversD_2014__SKBSTL023__bin.2	41.8	101571
GUT_GENOME096502_01650	Peptidase T	d__Bacteria;p__Firmicutes_A;c__Clostridia;o__Tissierellales;f__Peptoniphilaceae;g__Neofamilia;s__Neofamilia massiliensis	p__Firmicutes_A	5.2e-19	64.7	228	1	[[11, 362]]	6.5e-19	GUT_GENOME096502	Isolate	GCF_001299475	33.98	101506
GUT_GENOME097783_00102	N-formyl-4-amino-5-aminomethyl-2-methylpyrimidine deformylase	d__Bacteria;p__Fusobacteriota;c__Fusobacteriia;o__Fusobacteriales;f__Fusobacteriaceae;g__Fusobacterium_B;s__	p__Fusobacteriota	8e-09	31	234	1	[[9, 291]]	1.1e-08	GUT_GENOME097783	MAG	HeQ_2017__RSZAXPI003080-114__bin.1	32.22	101595
GUT_GENOME097783_00656	Peptidase T	d__Bacteria;p__Fusobacteriota;c__Fusobacteriia;o__Fusobacteriales;f__Fusobacteriaceae;g__Fusobacterium_B;s__	p__Fusobacteriota	1.1e-08	30.6	318	1	[[2, 355]]	1.4e-08	GUT_GENOME097783	MAG	HeQ_2017__RSZAXPI003080-114__bin.1	32.22	101595
GUT_GENOME269364_01448	Acetylornithine deacetylase	d__Bacteria;p__Actinobacteriota;c__Coriobacteriia;o__Coriobacteriales;f__Coriobacteriaceae;g__Collinsella;s__Collinsella aerofaciens_F	p__Actinobacteriota	5.5e-12	41.6	320	1	[[8, 388]]	6.9e-12	GUT_GENOME269364	MAG	ZeeviD_2015__PNP_Main_262__bin.29	59.92	104356
GUT_GENOME243514_00869	Peptidase T	d__Bacteria;p__Firmicutes_A;c__Clostridia;o__Tissierellales;f__Peptoniphilaceae;g__Peptoniphilus_B;s__Peptoniphilus_B duerdenii	p__Firmicutes_A	7.3e-17	57.4	320	1	[[5, 367]]	9.3e-17	GUT_GENOME243514	MAG	VincentC_2016__MM034.1__bin.23	33.99	103757
GUT_GENOME243236_00758	putative hydrolase YxeP	d__Bacteria;p__Firmicutes_A;c__Clostridia;o__Tissierellales;f__Ezakiellaceae;g__Ezakiella;s__Ezakiella coagulans	p__Firmicutes_A	4.2e-08	28.5	238	1	[[30, 308]]	8.7e-08	GUT_GENOME243236	MAG	VincentC_2016__MM021.1__bin.15	35.8	103740
GUT_GENOME243885_00845	putative hydrolase YxeP	d__Bacteria;p__Firmicutes_A;c__Clostridia;o__Tissierellales;f__Ezakiellaceae;g__Ezakiella;s__Ezakiella massiliensis	p__Firmicutes_A	8.7e-11	37.2	290	1	[[2, 306]]	1.5e-10	GUT_GENOME243885	MAG	VincentC_2016__MM060.1__bin.2	37.11	103775
GUT_GENOME242955_00177	putative succinyl-diaminopimelate desuccinylase	d__Bacteria;p__Firmicutes_A;c__Clostridia;o__Tissierellales;f__Peptoniphilaceae;g__Peptoniphilus_C;s__Peptoniphilus_C urinimassiliensis	p__Firmicutes_A	4.1e-11	38.3	286	1	[[1, 308]]	6.9e-11	GUT_GENOME242955	MAG	VincentC_2016__MM002.1__bin.21	51.83	103721
GUT_GENOME242942_00821	Peptidase T	d__Bacteria;p__Firmicutes_A;c__Clostridia;o__Tissierellales;f__Peptoniphilaceae;g__Peptoniphilus_B;s__	p__Firmicutes_A	9.2e-17	56.7	369	1	[[3, 369]]	1.2e-16	GUT_GENOME242942	MAG	VincentC_2016__MM001.4__bin.25	35.32	103719
GUT_GENOME242942_00380	putative hydrolase YxeP	d__Bacteria;p__Firmicutes_A;c__Clostridia;o__Tissierellales;f__Peptoniphilaceae;g__Peptoniphilus_B;s__	p__Firmicutes_A	8.5e-07	23.8	285	2	[[47, 314], [268, 360]]	2.3e-06	GUT_GENOME242942	MAG	VincentC_2016__MM001.4__bin.25	35.32	103719
GUT_GENOME096259_02050	Carboxypeptidase G2	d__Bacteria;p__Proteobacteria;c__Gammaproteobacteria;o__Burkholderiales;f__Burkholderiaceae;g__Sutterella;s__Sutterella parvirubra	p__Proteobacteria	1.4e-39	132.7	377	1	[[2, 370]]	1.9e-39	GUT_GENOME096259	Isolate	GCF_000250875	65.28	101401	0.182315	0.0165589
GUT_GENOME096375_02666	putative succinyl-diaminopimelate desuccinylase	d__Bacteria;p__Firmicutes_A;c__Clostridia;o__Lachnospirales;f__Lachnospiraceae;g__Tyzzerella;s__Tyzzerella sp000411335	p__Firmicutes_A	4.9e-13	45.7	244	1	[[15, 322]]	6.3e-13	GUT_GENOME096375	Isolate	GCF_000411335	41.18	101439	1.27621	0.014035
GUT_GENOME096375_02669	N-formyl-4-amino-5-aminomethyl-2-methylpyrimidine deformylase	d__Bacteria;p__Firmicutes_A;c__Clostridia;o__Lachnospirales;f__Lachnospiraceae;g__Tyzzerella;s__Tyzzerella sp000411335	p__Firmicutes_A	2.7e-08	30	235	1	[[0, 264]]	4e-08	GUT_GENOME096375	Isolate	GCF_000411335	41.18	101439	1.27621	0.014035
GUT_GENOME096375_01436	putative hydrolase YxeP	d__Bacteria;p__Firmicutes_A;c__Clostridia;o__Lachnospirales;f__Lachnospiraceae;g__Tyzzerella;s__Tyzzerella sp000411335	p__Firmicutes_A	2.9e-07	26.7	261	1	[[32, 308]]	4e-07	GUT_GENOME096375	Isolate	GCF_000411335	41.18	101439	1.27621	0.014035
GUT_GENOME096290_02322	Succinyl-diaminopimelate desuccinylase	d__Bacteria;p__Actinobacteriota;c__Actinobacteria;o__Propionibacteriales;f__Nocardioidaceae;g__Aeromicrobium_A;s__Aeromicrobium_A massiliense	p__Actinobacteriota	1.3e-08	31.3	285	2	[[0, 250], [277, 338]]	0.00093	GUT_GENOME096290	Isolate	GCF_000312105	72.65	101418
GUT_GENOME096462_03580	Peptidase T	d__Bacteria;p__Firmicutes;c__Bacilli;o__Bacillales;f__Bacillaceae_A;g__Bacillus_D;s__Bacillus_D sp000821085	p__Firmicutes	1.4e-12	44.9	320	1	[[3, 380]]	1.5e-12	GUT_GENOME096462	Isolate	GCF_000821085	44.78	101481
GUT_GENOME096462_02595	Peptidase T	d__Bacteria;p__Firmicutes;c__Bacilli;o__Bacillales;f__Bacillaceae_A;g__Bacillus_D;s__Bacillus_D sp000821085	p__Firmicutes	1.7e-11	41.3	333	1	[[2, 341]]	2.1e-11	GUT_GENOME096462	Isolate	GCF_000821085	44.78	101481
GUT_GENOME254864_01330	putative succinyl-diaminopimelate desuccinylase	d__Bacteria;p__Actinobacteriota;c__Coriobacteriia;o__Coriobacteriales;f__Coriobacteriaceae;g__Collinsella;s__Collinsella aerofaciens_F	p__Actinobacteriota	1.4e-08	30.2	263	1	[[10, 392]]	1.6e-08	GUT_GENOME254864	MAG	XieH_2016__YSZC12003_36243__bin.45	59.96	104048
GUT_GENOME255999_00441	putative succinyl-diaminopimelate desuccinylase	d__Bacteria;p__Firmicutes_A;c__Clostridia;o__Lachnospirales;f__Lachnospiraceae;g__Clostridium_M;s__	p__Firmicutes_A	1e-11	41.4	230	1	[[36, 306]]	1.5e-11	GUT_GENOME255999	MAG	XieH_2016__YSZC12003_36697__bin.32	46.15	104087
GUT_GENOME255584_00385	putative succinyl-diaminopimelate desuccinylase	d__Bacteria;p__Actinobacteriota;c__Coriobacteriia;o__Coriobacteriales;f__Coriobacteriaceae;g__Collinsella;s__	p__Actinobacteriota	7.7e-12	40	312	1	[[9, 393]]	9.6e-12	GUT_GENOME255584	MAG	XieH_2016__YSZC12003_36587__bin.85	59.82	104069
GUT_GENOME243084_03989	Carboxypeptidase G2	d__Bacteria;p__Proteobacteria;c__Alphaproteobacteria;o__Rhizobiales;f__Xanthobacteraceae;g__Afipia;s__Afipia broomeae	p__Proteobacteria	1.5e-33	114.2	379	1	[[7, 377]]	1.9e-33	GUT_GENOME243084	MAG	VincentC_2016__MM009.2__bin.8	61.21	103734
GUT_GENOME243082_04479	Carboxypeptidase G2	d__Bacteria;p__Proteobacteria;c__Alphaproteobacteria;o__Rhizobiales;f__Xanthobacteraceae;g__Bradyrhizobium;s__Bradyrhizobium sp003020075	p__Proteobacteria	1.6e-217	721	418	1	[[3, 453]]	1.8e-217	GUT_GENOME243082	MAG	VincentC_2016__MM009.2__bin.10	64.61	103733
GUT_GENOME243082_06710	Carboxypeptidase G2	d__Bacteria;p__Proteobacteria;c__Alphaproteobacteria;o__Rhizobiales;f__Xanthobacteraceae;g__Bradyrhizobium;s__Bradyrhizobium sp003020075	p__Proteobacteria	3.3e-124	413.4	408	1	[[2, 418]]	3.8e-124	GUT_GENOME243082	MAG	VincentC_2016__MM009.2__bin.10	64.61	103733
GUT_GENOME243082_04751	Carboxypeptidase G2	d__Bacteria;p__Proteobacteria;c__Alphaproteobacteria;o__Rhizobiales;f__Xanthobacteraceae;g__Bradyrhizobium;s__Bradyrhizobium sp003020075	p__Proteobacteria	6.2e-58	194.9	380	1	[[10, 385]]	7.6e-58	GUT_GENOME243082	MAG	VincentC_2016__MM009.2__bin.10	64.61	103733
GUT_GENOME243082_01446	Carboxypeptidase G2	d__Bacteria;p__Proteobacteria;c__Alphaproteobacteria;o__Rhizobiales;f__Xanthobacteraceae;g__Bradyrhizobium;s__Bradyrhizobium sp003020075	p__Proteobacteria	1.1e-34	118.3	379	1	[[6, 376]]	1.8e-34	GUT_GENOME243082	MAG	VincentC_2016__MM009.2__bin.10	64.61	103733
GUT_GENOME243082_01993	Succinyl-diaminopimelate desuccinylase	d__Bacteria;p__Proteobacteria;c__Alphaproteobacteria;o__Rhizobiales;f__Xanthobacteraceae;g__Bradyrhizobium;s__Bradyrhizobium sp003020075	p__Proteobacteria	1.3e-10	39	256	2	[[32, 276], [315, 386]]	1e-09	GUT_GENOME243082	MAG	VincentC_2016__MM009.2__bin.10	64.61	103733
GUT_GENOME207893_00860	Peptidase T	d__Bacteria;p__Firmicutes_A;c__Clostridia;o__Clostridiales;f__Clostridiaceae;g__Clostridium_G;s__Clostridium_G cochlearium	p__Firmicutes_A	3.1e-17	59.2	269	1	[[1, 356]]	4.3e-17	GUT_GENOME207893	MAG	SRR5963299_bin.14	28.25	103139
GUT_GENOME207750_03234	Carboxypeptidase G2	d__Bacteria;p__Firmicutes;c__Bacilli;o__Bacillales;f__Bacillaceae_A;g__Bacillus_AC;s__Bacillus_AC sp900199695	p__Firmicutes	1.3e-46	156.7	380	1	[[0, 376]]	1.6e-46	GUT_GENOME207750	MAG	SRR5963259_bin.5	34.97	103133
GUT_GENOME207750_03530	Peptidase T	d__Bacteria;p__Firmicutes;c__Bacilli;o__Bacillales;f__Bacillaceae_A;g__Bacillus_AC;s__Bacillus_AC sp900199695	p__Firmicutes	1.2e-14	51.3	265	1	[[1, 330]]	1.5e-14	GUT_GENOME207750	MAG	SRR5963259_bin.5	34.97	103133
GUT_GENOME207750_02359	putative hydrolase YxeP	d__Bacteria;p__Firmicutes;c__Bacilli;o__Bacillales;f__Bacillaceae_A;g__Bacillus_AC;s__Bacillus_AC sp900199695	p__Firmicutes	9.6e-06	22	265	1	[[96, 373]]	1.9e-05	GUT_GENOME207750	MAG	SRR5963259_bin.5	34.97	103133
GUT_GENOME207461_01430	putative succinyl-diaminopimelate desuccinylase	d__Bacteria;p__Actinobacteriota;c__Coriobacteriia;o__Coriobacteriales;f__Coriobacteriaceae;g__Collinsella;s__	p__Actinobacteriota	2.4e-11	39.6	310	1	[[9, 393]]	2.9e-11	GUT_GENOME207461	MAG	SRR5963185_bin.16	60.07	103122
GUT_GENOME097552_00664	Acetylornithine deacetylase	d__Bacteria;p__Actinobacteriota;c__Coriobacteriia;o__Coriobacteriales;f__Coriobacteriaceae;g__Collinsella;s__	p__Actinobacteriota	6.3e-13	44.3	324	1	[[8, 393]]	7.9e-13	GUT_GENOME097552	MAG	HanniganGD_2017__MG100162__bin.2	60.04	101582
GUT_GENOME096522_00724	putative succinyl-diaminopimelate desuccinylase	d__Bacteria;p__Firmicutes;c__Bacilli;o__Lactobacillales;f__Lactobacillaceae;g__Lactobacillus_H;s__Lactobacillus_H antri	p__Firmicutes	1.3e-18	63.7	238	1	[[7, 332]]	1.7e-18	GUT_GENOME096522	Isolate	GCF_001435475	51.11	101516
GUT_GENOME096522_00474	putative succinyl-diaminopimelate desuccinylase	d__Bacteria;p__Firmicutes;c__Bacilli;o__Lactobacillales;f__Lactobacillaceae;g__Lactobacillus_H;s__Lactobacillus_H antri	p__Firmicutes	1.8e-09	33.5	319	1	[[1, 376]]	2.2e-09	GUT_GENOME096522	Isolate	GCF_001435475	51.11	101516
GUT_GENOME096572_01227	Carboxypeptidase G2	d__Bacteria;p__Firmicutes_C;c__Negativicutes;o__Veillonellales;f__Megasphaeraceae;g__Caecibacter;s__Caecibacter massiliensis	p__Firmicutes_C	3.2e-50	168	375	1	[[3, 385]]	3.9e-50	GUT_GENOME096572	Isolate	GCF_900095875	49.66	101561
GUT_GENOME096572_01275	putative succinyl-diaminopimelate desuccinylase	d__Bacteria;p__Firmicutes_C;c__Negativicutes;o__Veillonellales;f__Megasphaeraceae;g__Caecibacter;s__Caecibacter massiliensis	p__Firmicutes_C	5.7e-18	61.7	229	1	[[33, 299]]	7.6e-18	GUT_GENOME096572	Isolate	GCF_900095875	49.66	101561
GUT_GENOME097649_00294	putative succinyl-diaminopimelate desuccinylase	d__Bacteria;p__Actinobacteriota;c__Coriobacteriia;o__Coriobacteriales;f__Coriobacteriaceae;g__Collinsella;s__	p__Actinobacteriota	3.7e-11	38.8	320	1	[[9, 383]]	4.8e-11	GUT_GENOME097649	MAG	HanniganGD_2017__MG100201__bin.6	60.12	101585
GUT_GENOME256235_01152	Acetylornithine deacetylase	d__Bacteria;p__Actinobacteriota;c__Coriobacteriia;o__Coriobacteriales;f__Coriobacteriaceae;g__Collinsella;s__	p__Actinobacteriota	1.9e-11	39.7	322	1	[[9, 392]]	2.5e-11	GUT_GENOME256235	MAG	XieH_2016__YSZC12003_36795__bin.55	59.86	104097
GUT_GENOME255225_01725	Acetylornithine deacetylase	d__Bacteria;p__Actinobacteriota;c__Coriobacteriia;o__Coriobacteriales;f__Coriobacteriaceae;g__Collinsella;s__	p__Actinobacteriota	1.7e-11	39.9	320	1	[[8, 387]]	2.1e-11	GUT_GENOME255225	MAG	XieH_2016__YSZC12003_36473__bin.82	60.06	104058
GUT_GENOME113527_02326	Putative succinyl-diaminopimelate desuccinylase DapE	d__Bacteria;p__Bacteroidota;c__Bacteroidia;o__Bacteroidales;f__Bacteroidaceae;g__Paraprevotella;s__	p__Bacteroidota	6.7e-14	48.3	231	1	[[24, 306]]	8.3e-14	GUT_GENOME113527	MAG	LeChatelierE_2013__MH0430__bin.34	56.84	101886
GUT_GENOME110771_00231	Succinyl-diaminopimelate desuccinylase	d__Bacteria;p__Verrucomicrobiota;c__Lentisphaeria;o__Victivallales;f__UBA1829;g__;s__	p__Verrucomicrobiota	2.2e-11	40	342	1	[[18, 365]]	3.3e-11	GUT_GENOME110771	MAG	LeChatelierE_2013__MH0189__bin.39	54.34	101812
GUT_GENOME076944_00837	putative hydrolase YxeP	d__Bacteria;p__Firmicutes_A;c__Clostridia;o__Oscillospirales;f__Acutalibacteraceae;g__UBA4871;s__	p__Firmicutes_A	4.8e-08	28.9	267	1	[[4, 315]]	7.1e-08	GUT_GENOME076944	MAG	ERS473137_3	53.64	101069
GUT_GENOME065434_02295	Carboxypeptidase G2	d__Bacteria;p__Firmicutes_A;c__Clostridia;o__Peptostreptococcales;f__Peptostreptococcaceae;g__Intestinibacter;s__	p__Firmicutes_A	4.1e-18	62.4	267	1	[[1, 367]]	4.5e-18	GUT_GENOME065434	MAG	ERR688621_bin.2	28.7	101007	1.00273	0.0092346
GUT_GENOME215548_01666	putative succinyl-diaminopimelate desuccinylase	d__Bacteria;p__Actinobacteriota;c__Coriobacteriia;o__Coriobacteriales;f__Coriobacteriaceae;g__Collinsella;s__	p__Actinobacteriota	5.4e-10	34.9	256	1	[[11, 387]]	6.2e-10	GUT_GENOME215548	MAG	SRS043411_49	60.09	103228
GUT_GENOME217842_01644	Acetylornithine deacetylase	d__Bacteria;p__Bacteroidota;c__Bacteroidia;o__Bacteroidales;f__Muribaculaceae;g__Muribaculum;s__Muribaculum sp002473395	p__Bacteroidota	2.1e-13	46.3	229	1	[[26, 283]]	2.7e-13	GUT_GENOME217842	MAG	SRS104311_52	45.72	103255
GUT_GENOME219382_00815	Succinyl-diaminopimelate desuccinylase	d__Bacteria;p__Proteobacteria;c__Alphaproteobacteria;o__RF32;f__CAG-239;g__51-20;s__	p__Proteobacteria	5.2e-12	41.3	300	1	[[64, 361]]	1.2e-11	GUT_GENOME219382	MAG	SRS146812_107	46.09	103283
GUT_GENOME165490_00830	N-acetyl-lysine deacetylase	d__Bacteria;p__Firmicutes;c__Bacilli;o__Erysipelotrichales;f__Erysipelotrichaceae;g__Holdemania;s__Holdemania sp900120005	p__Firmicutes	1.5e-11	40.8	321	1	[[37, 375]]	1.9e-11	GUT_GENOME165490	MAG	SRR1197078_bin.13	51.38	102779
GUT_GENOME158752_01093	Acetylornithine deacetylase	d__Bacteria;p__Firmicutes_A;c__Clostridia;o__Oscillospirales;f__Oscillospiraceae;g__Oscillibacter;s__	p__Firmicutes_A	1.9e-15	53.4	257	1	[[1, 264]]	2.6e-15	GUT_GENOME158752	MAG	RaymondF_2016__P22E90__bin.89	59.91	102704
GUT_GENOME161802_01378	Acetylornithine deacetylase	d__Bacteria;p__Actinobacteriota;c__Coriobacteriia;o__Coriobacteriales;f__Coriobacteriaceae;g__Collinsella;s__	p__Actinobacteriota	8.3e-13	44.2	302	1	[[10, 389]]	1e-12	GUT_GENOME161802	MAG	SchirmerM_2016__G88961__bin.29	60.08	102741
GUT_GENOME161262_01925	N-formyl-4-amino-5-aminomethyl-2-methylpyrimidine deformylase	d__Bacteria;p__Firmicutes_A;c__Clostridia;o__Oscillospirales;f__Acutalibacteraceae;g__;s__	p__Firmicutes_A	5.6e-13	45	242	1	[[3, 265]]	7.7e-13	GUT_GENOME161262	MAG	SchirmerM_2016__G88896__bin.10	46.79	102736	0.0911577	0.00832304
GUT_GENOME096937_00373	putative succinyl-diaminopimelate desuccinylase	d__Bacteria;p__Actinobacteriota;c__Coriobacteriia;o__Coriobacteriales;f__Coriobacteriaceae;g__Collinsella;s__	p__Actinobacteriota	2.5e-10	35.7	305	1	[[9, 386]]	3.2e-10	GUT_GENOME096937	MAG	GeversD_2014__SKBSTL028__bin.12	60.41	101573
GUT_GENOME096500_00784	putative succinyl-diaminopimelate desuccinylase	d__Bacteria;p__Firmicutes_A;c__Clostridia;o__Tissierellales;f__Tepidimicrobiaceae;g__Mt11;s__Mt11 sp001282665	p__Firmicutes_A	2.5e-16	56.8	333	1	[[10, 389]]	3.2e-16	GUT_GENOME096500	Isolate	GCF_001282665	31.48	101504
GUT_GENOME096500_03500	Succinyl-diaminopimelate desuccinylase	d__Bacteria;p__Firmicutes_A;c__Clostridia;o__Tissierellales;f__Tepidimicrobiaceae;g__Mt11;s__Mt11 sp001282665	p__Firmicutes_A	1.8e-10	37.5	239	1	[[28, 290]]	2.5e-10	GUT_GENOME096500	Isolate	GCF_001282665	31.48	101504
GUT_GENOME157873_01127	Succinyl-diaminopimelate desuccinylase	d__Bacteria;p__Bacteroidota;c__Bacteroidia;o__Bacteroidales;f__Rikenellaceae;g__Alistipes;s__	p__Bacteroidota	1.9e-10	36.6	236	1	[[11, 297]]	2.4e-10	GUT_GENOME157873	MAG	RaymondF_2016__P13E90__bin.87	54.79	102675
GUT_GENOME158523_00828	Succinyl-diaminopimelate desuccinylase	d__Bacteria;p__Firmicutes_A;c__Clostridia;o__Oscillospirales;f__Oscillospiraceae;g__Oscillibacter;s__	p__Firmicutes_A	4.8e-30	101.8	286	1	[[2, 309]]	6.3e-30	GUT_GENOME158523	MAG	RaymondF_2016__P20E90__bin.24	58.07	102691
GUT_GENOME158523_02290	Peptidase T	d__Bacteria;p__Firmicutes_A;c__Clostridia;o__Oscillospirales;f__Oscillospiraceae;g__Oscillibacter;s__	p__Firmicutes_A	1.3e-12	44.3	272	1	[[1, 351]]	1.5e-12	GUT_GENOME158523	MAG	RaymondF_2016__P20E90__bin.24	58.07	102691
GUT_GENOME158155_00239	Carboxypeptidase G2	d__Bacteria;p__Firmicutes_A;c__Clostridia;o__Oscillospirales;f__Oscillospiraceae;g__Oscillibacter;s__	p__Firmicutes_A	1.3e-34	116.4	371	1	[[5, 387]]	1.6e-34	GUT_GENOME158155	MAG	RaymondF_2016__P18E0__bin.69	60.5	102682
GUT_GENOME158155_00240	Carboxypeptidase G2	d__Bacteria;p__Firmicutes_A;c__Clostridia;o__Oscillospirales;f__Oscillospiraceae;g__Oscillibacter;s__	p__Firmicutes_A	1.9e-32	109.3	365	1	[[5, 387]]	2.4e-32	GUT_GENOME158155	MAG	RaymondF_2016__P18E0__bin.69	60.5	102682
GUT_GENOME158155_00368	Peptidase T	d__Bacteria;p__Firmicutes_A;c__Clostridia;o__Oscillospirales;f__Oscillospiraceae;g__Oscillibacter;s__	p__Firmicutes_A	8.8e-13	44.5	264	1	[[1, 347]]	1.1e-12	GUT_GENOME158155	MAG	RaymondF_2016__P18E0__bin.69	60.5	102682
GUT_GENOME097536_01187	Acetylornithine deacetylase	d__Bacteria;p__Actinobacteriota;c__Coriobacteriia;o__Coriobacteriales;f__Coriobacteriaceae;g__Collinsella;s__	p__Actinobacteriota	1.4e-11	40.2	318	1	[[8, 385]]	1.7e-11	GUT_GENOME097536	MAG	HanniganGD_2017__MG100157__bin.11	60.24	101581
GUT_GENOME096525_03898	Peptidase T	d__Bacteria;p__Firmicutes_I;c__Bacilli_A;o__Paenibacillales;f__Paenibacillaceae;g__Gorillibacterium;s__Gorillibacterium timonense	p__Firmicutes_I	1.1e-19	68.3	274	1	[[3, 290]]	1.5e-19	GUT_GENOME096525	Isolate	GCF_001457415	53.34	101518
GUT_GENOME096744_00991	putative succinyl-diaminopimelate desuccinylase	d__Bacteria;p__Actinobacteriota;c__Coriobacteriia;o__Coriobacteriales;f__Coriobacteriaceae;g__Collinsella;s__	p__Actinobacteriota	4.8e-11	38	265	1	[[9, 384]]	5.7e-11	GUT_GENOME096744	MAG	GeversD_2014__SKBSTL013__bin.1	60.5	101568
GUT_GENOME097660_01032	Acetylornithine deacetylase	d__Bacteria;p__Actinobacteriota;c__Coriobacteriia;o__Coriobacteriales;f__Coriobacteriaceae;g__Collinsella;s__	p__Actinobacteriota	3.8e-12	42	320	1	[[8, 387]]	4.7e-12	GUT_GENOME097660	MAG	HanniganGD_2017__MG100205__bin.5	60.16	101586
GUT_GENOME237883_00038	Peptidase T	d__Bacteria;p__Firmicutes_C;c__Negativicutes;o__Selenomonadales;f__Selenomonadaceae;g__UBA2913;s__	p__Firmicutes_C	3e-24	82.3	276	1	[[1, 340]]	3.6e-24	GUT_GENOME237883	MAG	SRS476348_97	56.74	103625
GUT_GENOME237883_01175	Peptidase T	d__Bacteria;p__Firmicutes_C;c__Negativicutes;o__Selenomonadales;f__Selenomonadaceae;g__UBA2913;s__	p__Firmicutes_C	3.8e-08	29.2	264	1	[[1, 285]]	4.9e-08	GUT_GENOME237883	MAG	SRS476348_97	56.74	103625
GUT_GENOME254490_00764	Acetylornithine deacetylase	d__Bacteria;p__Bacteroidota;c__Bacteroidia;o__Bacteroidales;f__UBA11471;g__UBA11471;s__	p__Bacteroidota	3.2e-12	42.4	237	1	[[28, 293]]	4.5e-12	GUT_GENOME254490	MAG	XieH_2016__YSZC12003_36058__bin.109	51.58	104037
GUT_GENOME255709_01322	N-acetyl-lysine deacetylase	d__Bacteria;p__Firmicutes_A;c__Clostridia;o__Monoglobales;f__;g__;s__	p__Firmicutes_A	6.7e-10	34.9	234	1	[[25, 361]]	7.8e-10	GUT_GENOME255709	MAG	XieH_2016__YSZC12003_36667__bin.55	42.53	104072
GUT_GENOME256176_01132	Carboxypeptidase G2	d__Bacteria;p__Proteobacteria;c__Gammaproteobacteria;o__Burkholderiales;f__Burkholderiaceae;g__Sutterella;s__	p__Proteobacteria	3.7e-35	117.8	378	1	[[2, 371]]	4.7e-35	GUT_GENOME256176	MAG	XieH_2016__YSZC12003_36703__bin.78	49.97	104096
GUT_GENOME142625_00222	Peptidase T	d__Bacteria;p__Firmicutes_A;c__Clostridia;o__Lachnospirales;f__Lachnospiraceae;g__Lachnoclostridium_A;s__Lachnoclostridium_A edouardi	p__Firmicutes_A	2.5e-13	46.8	271	1	[[0, 279]]	3.1e-13	GUT_GENOME142625	Isolate	PATRIC_1926283_3	42.49	102417
GUT_GENOME142625_01952	Succinyl-diaminopimelate desuccinylase	d__Bacteria;p__Firmicutes_A;c__Clostridia;o__Lachnospirales;f__Lachnospiraceae;g__Lachnoclostridium_A;s__Lachnoclostridium_A edouardi	p__Firmicutes_A	2.3e-09	33.7	236	1	[[28, 294]]	3.1e-09	GUT_GENOME142625	Isolate	PATRIC_1926283_3	42.49	102417
GUT_GENOME082811_00320	Carboxypeptidase G2	d__Bacteria;p__Proteobacteria;c__Gammaproteobacteria;o__Burkholderiales;f__Burkholderiaceae;g__Duodenibacillus;s__	p__Proteobacteria	3.4e-41	137.7	371	1	[[3, 371]]	4.6e-41	GUT_GENOME082811	MAG	ERS537263_55	61.15	101113
GUT_GENOME082811_01264	N-acetyl-lysine deacetylase	d__Bacteria;p__Proteobacteria;c__Gammaproteobacteria;o__Burkholderiales;f__Burkholderiaceae;g__Duodenibacillus;s__	p__Proteobacteria	1.4e-14	50	267	1	[[54, 360]]	1.9e-14	GUT_GENOME082811	MAG	ERS537263_55	61.15	101113
GUT_GENOME084610_02336	Putative succinyl-diaminopimelate desuccinylase DapE	d__Bacteria;p__Firmicutes_A;c__Clostridia;o__Christensenellales;f__CAG-138;g__UBA1685;s__UBA1685 sp002320595	p__Firmicutes_A	1.5e-15	53.9	334	1	[[34, 378]]	2e-15	GUT_GENOME084610	MAG	ERS537327_27	54.74	101132	2.00547	0.0110944
GUT_GENOME084610_00267	Acetylornithine deacetylase	d__Bacteria;p__Firmicutes_A;c__Clostridia;o__Christensenellales;f__CAG-138;g__UBA1685;s__UBA1685 sp002320595	p__Firmicutes_A	2.5e-12	43.3	241	1	[[4, 334]]	3e-12	GUT_GENOME084610	MAG	ERS537327_27	54.74	101132	2.00547	0.0110944
GUT_GENOME085056_01098	putative succinyl-diaminopimelate desuccinylase	d__Bacteria;p__Actinobacteriota;c__Coriobacteriia;o__Coriobacteriales;f__Coriobacteriaceae;g__Collinsella;s__Collinsella sp002232035	p__Actinobacteriota	3.5e-10	35.6	300	1	[[9, 390]]	4.3e-10	GUT_GENOME085056	MAG	ERS537341_55	59.79	101138
GUT_GENOME081254_01491	putative succinyl-diaminopimelate desuccinylase	d__Bacteria;p__Firmicutes;c__Bacilli;o__Lactobacillales;f__Lactobacillaceae;g__Weissella;s__Weissella viridescens	p__Firmicutes	9.4e-20	66.9	313	1	[[9, 351]]	1.2e-19	GUT_GENOME081254	MAG	ERS537206_3	41.31	101100
GUT_GENOME092065_02470	Carboxypeptidase G2	d__Bacteria;p__Firmicutes_A;c__Clostridia;o__Lachnospirales;f__Lachnospiraceae;g__;s__	p__Firmicutes_A	2.4e-55	185.4	379	1	[[3, 387]]	2.9e-55	GUT_GENOME092065	MAG	FengQ_2015__SID31501__bin.14	52.32	101199	0.182315	0.00773801
GUT_GENOME092065_01255	Carboxypeptidase G2	d__Bacteria;p__Firmicutes_A;c__Clostridia;o__Lachnospirales;f__Lachnospiraceae;g__;s__	p__Firmicutes_A	7.8e-50	167.2	384	1	[[1, 377]]	9.1e-50	GUT_GENOME092065	MAG	FengQ_2015__SID31501__bin.14	52.32	101199	0.182315	0.00773801
GUT_GENOME092065_03277	Carboxypeptidase G2	d__Bacteria;p__Firmicutes_A;c__Clostridia;o__Lachnospirales;f__Lachnospiraceae;g__;s__	p__Firmicutes_A	9.3e-22	74.7	283	1	[[1, 357]]	1.1e-21	GUT_GENOME092065	MAG	FengQ_2015__SID31501__bin.14	52.32	101199	0.182315	0.00773801
GUT_GENOME092065_02666	N-acetyl-lysine deacetylase	d__Bacteria;p__Firmicutes_A;c__Clostridia;o__Lachnospirales;f__Lachnospiraceae;g__;s__	p__Firmicutes_A	1.7e-14	50.8	250	2	[[4, 59], [65, 292]]	3.7e-14	GUT_GENOME092065	MAG	FengQ_2015__SID31501__bin.14	52.32	101199	0.182315	0.00773801
GUT_GENOME092065_03043	putative hydrolase YxeP	d__Bacteria;p__Firmicutes_A;c__Clostridia;o__Lachnospirales;f__Lachnospiraceae;g__;s__	p__Firmicutes_A	6e-09	32.4	282	1	[[26, 346]]	8.6e-09	GUT_GENOME092065	MAG	FengQ_2015__SID31501__bin.14	52.32	101199	0.182315	0.00773801
GUT_GENOME175986_02063	Succinyl-diaminopimelate desuccinylase	d__Bacteria;p__Firmicutes_A;c__Clostridia;o__Peptostreptococcales;f__Anaerovoracaceae;g__CAG-145;s__CAG-145 sp000435715	p__Firmicutes_A	2.5e-14	49.5	230	1	[[19, 306]]	3.1e-14	GUT_GENOME175986	MAG	SRR2992898_bin.44	45.41	102876
GUT_GENOME175986_01877	Succinyl-diaminopimelate desuccinylase	d__Bacteria;p__Firmicutes_A;c__Clostridia;o__Peptostreptococcales;f__Anaerovoracaceae;g__CAG-145;s__CAG-145 sp000435715	p__Firmicutes_A	2.4e-10	36.4	236	1	[[1, 248]]	4.4e-10	GUT_GENOME175986	MAG	SRR2992898_bin.44	45.41	102876
GUT_GENOME239781_00383	putative succinyl-diaminopimelate desuccinylase	d__Bacteria;p__Actinobacteriota;c__Coriobacteriia;o__Coriobacteriales;f__Coriobacteriaceae;g__Collinsella;s__	p__Actinobacteriota	8.5e-11	37.8	321	1	[[8, 382]]	1.1e-10	GUT_GENOME239781	Isolate	TM06-3	59.64	103700
GUT_GENOME240703_00117	Acetylornithine deacetylase	d__Bacteria;p__Actinobacteriota;c__Coriobacteriia;o__Coriobacteriales;f__Coriobacteriaceae;g__Collinsella;s__	p__Actinobacteriota	6.7e-13	44.5	318	1	[[8, 387]]	8.2e-13	GUT_GENOME240703	MAG	VatanenT_2016__G78701__bin.7	60.07	103707
GUT_GENOME243824_02343	putative hydrolase YxeP	d__Bacteria;p__Firmicutes_A;c__Clostridia;o__Oscillospirales;f__Oscillospiraceae;g__Flavonifractor;s__	p__Firmicutes_A	6.5e-07	25.4	276	1	[[27, 353]]	1.2e-06	GUT_GENOME243824	MAG	VincentC_2016__MM057.7__bin.2	59.42	103770
GUT_GENOME244156_01695	Succinyl-diaminopimelate desuccinylase	d__Bacteria;p__Actinobacteriota;c__Actinobacteria;o__Actinomycetales;f__Brevibacteriaceae;g__Brevibacterium;s__	p__Actinobacteriota	6.7e-51	170	337	1	[[52, 424]]	8.7e-51	GUT_GENOME244156	MAG	VincentC_2016__MM088__bin.19	62.57	103791
GUT_GENOME240840_02698	Peptidase T	d__Bacteria;p__Firmicutes_A;c__Clostridia;o__Tissierellales;f__Sedimentibacteraceae;g__Sedimentibacter;s__Sedimentibacter sp003457065	p__Firmicutes_A	3.7e-16	56	263	1	[[1, 278]]	4.7e-16	GUT_GENOME240840	MAG	VatanenT_2016__G78762__bin.2	37.6	103708
GUT_GENOME240840_00614	putative hydrolase YxeP	d__Bacteria;p__Firmicutes_A;c__Clostridia;o__Tissierellales;f__Sedimentibacteraceae;g__Sedimentibacter;s__Sedimentibacter sp003457065	p__Firmicutes_A	1.2e-10	37.9	264	1	[[33, 348]]	1.4e-10	GUT_GENOME240840	MAG	VatanenT_2016__G78762__bin.2	37.6	103708
GUT_GENOME242264_02043	Succinyl-diaminopimelate desuccinylase	d__Bacteria;p__Proteobacteria;c__Gammaproteobacteria;o__Xanthomonadales;f__Xanthomonadaceae;g__Stenotrophomonas;s__	p__Proteobacteria	1.9e-08	31.1	231	1	[[2, 367]]	2.2e-08	GUT_GENOME242264	MAG	VatanenT_2016__G80456__bin.3	66.2	103711
GUT_GENOME212497_01589	putative succinyl-diaminopimelate desuccinylase	d__Bacteria;p__Actinobacteriota;c__Coriobacteriia;o__Coriobacteriales;f__Coriobacteriaceae;g__Collinsella;s__	p__Actinobacteriota	3.1e-10	35.7	292	1	[[9, 390]]	3.7e-10	GUT_GENOME212497	MAG	SRR769513_bin.8	60.18	103191
GUT_GENOME096551_01396	Peptidase T	d__Bacteria;p__Firmicutes_A;c__Clostridia;o__Lachnospirales;f__Lachnospiraceae;g__Lachnoclostridium;s__Lachnoclostridium sp900078195	p__Firmicutes_A	3.3e-11	40.1	256	1	[[1, 277]]	4.2e-11	GUT_GENOME096551	Isolate	GCF_900078195	33.21	101543
GUT_GENOME096551_02251	Succinyl-diaminopimelate desuccinylase	d__Bacteria;p__Firmicutes_A;c__Clostridia;o__Lachnospirales;f__Lachnospiraceae;g__Lachnoclostridium;s__Lachnoclostridium sp900078195	p__Firmicutes_A	1.4e-08	31.5	245	1	[[19, 290]]	1.9e-08	GUT_GENOME096551	Isolate	GCF_900078195	33.21	101543
GUT_GENOME096560_03175	Peptidase T	d__Bacteria;p__Firmicutes;c__Bacilli;o__Bacillales;f__Amphibacillaceae;g__Gracilibacillus;s__Gracilibacillus timonensis	p__Firmicutes	2e-18	64	363	1	[[2, 366]]	3.4e-18	GUT_GENOME096560	Isolate	GCF_900086715	39.77	101549
GUT_GENOME267645_01011	putative succinyl-diaminopimelate desuccinylase	d__Bacteria;p__Actinobacteriota;c__Coriobacteriia;o__Coriobacteriales;f__Coriobacteriaceae;g__Collinsella;s__	p__Actinobacteriota	8.1e-12	41	273	1	[[9, 393]]	9.4e-12	GUT_GENOME267645	MAG	ZeeviD_2015__PNP_Main_195__bin.49	60.23	104332
GUT_GENOME270772_00669	Acetylornithine deacetylase	d__Bacteria;p__Bacteroidota;c__Bacteroidia;o__Bacteroidales;f__Muribaculaceae;g__CAG-485;s__	p__Bacteroidota	2e-07	26.5	230	1	[[18, 271]]	2.7e-07	GUT_GENOME270772	MAG	ZeeviD_2015__PNP_Main_327__bin.18	53.44	104377
GUT_GENOME272566_01334	Acetylornithine deacetylase	d__Bacteria;p__Actinobacteriota;c__Coriobacteriia;o__Coriobacteriales;f__Coriobacteriaceae;g__Collinsella;s__	p__Actinobacteriota	3.8e-12	42	320	1	[[8, 387]]	4.8e-12	GUT_GENOME272566	MAG	ZeeviD_2015__PNP_Main_408__bin.30	60.09	104399
GUT_GENOME280168_01730	Succinyl-diaminopimelate desuccinylase	d__Bacteria;p__Proteobacteria;c__Alphaproteobacteria;o__RF32;f__CAG-977;g__UBA11549;s__	p__Proteobacteria	1.8e-13	46.6	228	1	[[25, 361]]	2.1e-13	GUT_GENOME280168	MAG	ZeeviD_2015__PNP_Main_93__bin.14	48.29	104521	0.182315	0.0417226
GUT_GENOME280168_01732	Peptidase T	d__Bacteria;p__Proteobacteria;c__Alphaproteobacteria;o__RF32;f__CAG-977;g__UBA11549;s__	p__Proteobacteria	2.7e-12	42.7	291	2	[[26, 204], [230, 394]]	6.6e-07	GUT_GENOME280168	MAG	ZeeviD_2015__PNP_Main_93__bin.14	48.29	104521	0.182315	0.0417226
GUT_GENOME279899_00771	Acetylornithine deacetylase	d__Bacteria;p__Actinobacteriota;c__Coriobacteriia;o__Coriobacteriales;f__Coriobacteriaceae;g__Collinsella;s__	p__Actinobacteriota	1.8e-12	43.1	320	1	[[8, 387]]	2.2e-12	GUT_GENOME279899	MAG	ZeeviD_2015__PNP_Main_83__bin.1	60.08	104514
GUT_GENOME163751_01243	Acetylornithine deacetylase	d__Bacteria;p__Actinobacteriota;c__Coriobacteriia;o__Coriobacteriales;f__Coriobacteriaceae;g__Collinsella;s__Collinsella sp000763055	p__Actinobacteriota	2.1e-11	39.6	327	1	[[8, 392]]	2.6e-11	GUT_GENOME163751	MAG	SchirmerM_2016__G89175__bin.20	60.09	102764
GUT_GENOME167947_00707	putative succinyl-diaminopimelate desuccinylase	d__Bacteria;p__Firmicutes;c__Bacilli;o__Lactobacillales;f__Lactobacillaceae;g__Lactobacillus_F;s__Lactobacillus_F pentosus	p__Firmicutes	2.3e-10	37	338	2	[[26, 214], [198, 415]]	6.1e-05	GUT_GENOME167947	MAG	SRR1449478_bin.4	46.67	102787
GUT_GENOME167947_02319	Succinyl-diaminopimelate desuccinylase	d__Bacteria;p__Firmicutes;c__Bacilli;o__Lactobacillales;f__Lactobacillaceae;g__Lactobacillus_F;s__Lactobacillus_F pentosus	p__Firmicutes	5.6e-07	25.8	272	2	[[4, 241], [299, 383]]	1.3e-06	GUT_GENOME167947	MAG	SRR1449478_bin.4	46.67	102787
GUT_GENOME163684_00853	putative succinyl-diaminopimelate desuccinylase	d__Bacteria;p__Actinobacteriota;c__Coriobacteriia;o__Coriobacteriales;f__Coriobacteriaceae;g__Collinsella;s__Collinsella aerofaciens_F	p__Actinobacteriota	8.2e-12	41	320	1	[[8, 388]]	1e-11	GUT_GENOME163684	MAG	SchirmerM_2016__G89165__bin.21	59.91	102763	0.0911577	0.0103481
GUT_GENOME159033_01312	putative succinyl-diaminopimelate desuccinylase	d__Bacteria;p__Actinobacteriota;c__Coriobacteriia;o__Coriobacteriales;f__Coriobacteriaceae;g__Collinsella;s__	p__Actinobacteriota	2e-10	36.3	264	1	[[10, 391]]	2.3e-10	GUT_GENOME159033	MAG	RaymondF_2016__P2E0__bin.78	60.48	102714
GUT_GENOME162597_00781	putative succinyl-diaminopimelate desuccinylase	d__Bacteria;p__Actinobacteriota;c__Coriobacteriia;o__Coriobacteriales;f__Coriobacteriaceae;g__Collinsella;s__	p__Actinobacteriota	1.5e-09	33.6	262	1	[[11, 392]]	1.8e-09	GUT_GENOME162597	MAG	SchirmerM_2016__G89046__bin.21	60.2	102751
GUT_GENOME138452_00923	Succinyl-diaminopimelate desuccinylase	d__Bacteria;p__Firmicutes_A;c__Clostridia;o__Lachnospirales;f__Lachnospiraceae;g__;s__	p__Firmicutes_A	2.5e-06	23.4	304	1	[[65, 377]]	3.7e-06	GUT_GENOME138452	MAG	NielsenHB_2014__V1_UC50_1__bin.19	52.36	102210
GUT_GENOME140246_02908	Peptidase T	d__Bacteria;p__Firmicutes;c__Bacilli;o__Bacillales;f__Bacillaceae_G;g__Bacillus_A;s__Bacillus_A cereus_AD	p__Firmicutes	2.1e-13	47.7	326	1	[[1, 370]]	2.5e-13	GUT_GENOME140246	Isolate	OM02-3AC	35.33	102283
GUT_GENOME139424_01691	Acetylornithine deacetylase	d__Bacteria;p__Actinobacteriota;c__Coriobacteriia;o__Coriobacteriales;f__Coriobacteriaceae;g__Collinsella;s__	p__Actinobacteriota	3.2e-11	39	302	1	[[9, 388]]	3.9e-11	GUT_GENOME139424	MAG	Obregon-TitoAJ_2015__NO15__bin.18	59.91	102231
GUT_GENOME112022_00585	N-acetyl-lysine deacetylase	d__Bacteria;p__Firmicutes_A;c__Clostridia;o__4C28d-15;f__CAG-727;g__UBA1259;s__	p__Firmicutes_A	4.3e-14	47.9	234	1	[[37, 315]]	5.5e-14	GUT_GENOME112022	MAG	LeChatelierE_2013__MH0276__bin.104	45.72	101843	0.0911577	0.00854965
GUT_GENOME171445_00193	Peptidase T	d__Bacteria;p__Firmicutes_C;c__Negativicutes;o__Veillonellales;f__Negativicoccaceae;g__Negativicoccus;s__	p__Firmicutes_C	6.1e-22	73.3	331	1	[[1, 348]]	7.3e-22	GUT_GENOME171445	MAG	SRR1779132_bin.3	53.07	102820
GUT_GENOME171445_00173	Peptidase T	d__Bacteria;p__Firmicutes_C;c__Negativicutes;o__Veillonellales;f__Negativicoccaceae;g__Negativicoccus;s__	p__Firmicutes_C	4.8e-06	20.9	281	1	[[138, 418]]	9e-06	GUT_GENOME171445	MAG	SRR1779132_bin.3	53.07	102820
GUT_GENOME171367_00560	Carboxypeptidase G2	d__Bacteria;p__Firmicutes_A;c__Clostridia;o__Tissierellales;f__Tissierellaceae;g__Tissierella;s__Tissierella sp002266425	p__Firmicutes_A	3.4e-39	132.4	393	1	[[1, 390]]	4.5e-39	GUT_GENOME171367	MAG	SRR1779118_bin.14	31.06	102818
GUT_GENOME171367_03585	putative succinyl-diaminopimelate desuccinylase	d__Bacteria;p__Firmicutes_A;c__Clostridia;o__Tissierellales;f__Tissierellaceae;g__Tissierella;s__Tissierella sp002266425	p__Firmicutes_A	1.3e-22	77.7	252	1	[[23, 328]]	1.6e-22	GUT_GENOME171367	MAG	SRR1779118_bin.14	31.06	102818
GUT_GENOME171367_01362	Peptidase T	d__Bacteria;p__Firmicutes_A;c__Clostridia;o__Tissierellales;f__Tissierellaceae;g__Tissierella;s__Tissierella sp002266425	p__Firmicutes_A	3.8e-18	63	323	1	[[13, 371]]	5.3e-18	GUT_GENOME171367	MAG	SRR1779118_bin.14	31.06	102818
GUT_GENOME171367_00268	putative succinyl-diaminopimelate desuccinylase	d__Bacteria;p__Firmicutes_A;c__Clostridia;o__Tissierellales;f__Tissierellaceae;g__Tissierella;s__Tissierella sp002266425	p__Firmicutes_A	5.5e-12	42.7	282	1	[[4, 319]]	7.6e-12	GUT_GENOME171367	MAG	SRR1779118_bin.14	31.06	102818
GUT_GENOME171367_01806	putative succinyl-diaminopimelate desuccinylase	d__Bacteria;p__Firmicutes_A;c__Clostridia;o__Tissierellales;f__Tissierellaceae;g__Tissierella;s__Tissierella sp002266425	p__Firmicutes_A	1.2e-10	38.3	243	1	[[50, 321]]	1.9e-10	GUT_GENOME171367	MAG	SRR1779118_bin.14	31.06	102818
GUT_GENOME171367_02114	Succinyl-diaminopimelate desuccinylase	d__Bacteria;p__Firmicutes_A;c__Clostridia;o__Tissierellales;f__Tissierellaceae;g__Tissierella;s__Tissierella sp002266425	p__Firmicutes_A	9e-10	35.4	240	1	[[6, 292]]	1.3e-09	GUT_GENOME171367	MAG	SRR1779118_bin.14	31.06	102818
GUT_GENOME171367_01644	Peptidase T	d__Bacteria;p__Firmicutes_A;c__Clostridia;o__Tissierellales;f__Tissierellaceae;g__Tissierella;s__Tissierella sp002266425	p__Firmicutes_A	1.8e-09	34.4	375	1	[[0, 370]]	2.3e-09	GUT_GENOME171367	MAG	SRR1779118_bin.14	31.06	102818
GUT_GENOME175423_01123	putative succinyl-diaminopimelate desuccinylase	d__Bacteria;p__Actinobacteriota;c__Coriobacteriia;o__Coriobacteriales;f__Coriobacteriaceae;g__Collinsella;s__	p__Actinobacteriota	2.8e-12	42.4	320	1	[[8, 388]]	3.4e-12	GUT_GENOME175423	MAG	SRR2912805_bin.3	60.35	102865
GUT_GENOME066317_01496	Acetylornithine deacetylase	d__Bacteria;p__Actinobacteriota;c__Coriobacteriia;o__Coriobacteriales;f__Coriobacteriaceae;g__Collinsella;s__	p__Actinobacteriota	1.7e-10	36.6	320	1	[[8, 387]]	2e-10	GUT_GENOME066317	MAG	ERS235506_6	60.16	101019
GUT_GENOME239674_01435	putative succinyl-diaminopimelate desuccinylase	d__Bacteria;p__Actinobacteriota;c__Coriobacteriia;o__Coriobacteriales;f__Coriobacteriaceae;g__Collinsella;s__	p__Actinobacteriota	1.9e-10	36.6	307	1	[[9, 385]]	2.6e-10	GUT_GENOME239674	Isolate	TF05-9AC	59.86	103685
GUT_GENOME237882_00796	N-acetyl-lysine deacetylase	d__Bacteria;p__Actinobacteriota;c__Coriobacteriia;o__Coriobacteriales;f__Atopobiaceae;g__Olsenella_B;s__	p__Actinobacteriota	4.1e-12	42.2	278	1	[[39, 365]]	5.3e-12	GUT_GENOME237882	MAG	SRS476348_96	63.32	103624
GUT_GENOME158799_00356	Carboxypeptidase G2	d__Bacteria;p__Desulfobacterota_A;c__Desulfovibrionia;o__Desulfovibrionales;f__Desulfovibrionaceae;g__Bilophila;s__	p__Desulfobacterota_A	1.6e-30	103.1	387	1	[[1, 387]]	2.2e-30	GUT_GENOME158799	MAG	RaymondF_2016__P23C0__bin.8	58.59	102706
GUT_GENOME158799_01081	Succinyl-diaminopimelate desuccinylase	d__Bacteria;p__Desulfobacterota_A;c__Desulfovibrionia;o__Desulfovibrionales;f__Desulfovibrionaceae;g__Bilophila;s__	p__Desulfobacterota_A	3e-13	46.1	262	1	[[14, 322]]	4e-13	GUT_GENOME158799	MAG	RaymondF_2016__P23C0__bin.8	58.59	102706
GUT_GENOME161899_00462	putative succinyl-diaminopimelate desuccinylase	d__Bacteria;p__Actinobacteriota;c__Coriobacteriia;o__Coriobacteriales;f__Coriobacteriaceae;g__Collinsella;s__	p__Actinobacteriota	1.6e-11	40	321	1	[[8, 392]]	1.9e-11	GUT_GENOME161899	MAG	SchirmerM_2016__G88973__bin.13	59.86	102743
GUT_GENOME161205_00903	Acetylornithine deacetylase	d__Bacteria;p__Actinobacteriota;c__Coriobacteriia;o__Coriobacteriales;f__Coriobacteriaceae;g__Collinsella;s__	p__Actinobacteriota	2.4e-12	42.7	320	1	[[8, 388]]	3e-12	GUT_GENOME161205	MAG	SchirmerM_2016__G88890__bin.2	60.05	102734
GUT_GENOME238522_00451	N-acetyl-lysine deacetylase	d__Bacteria;p__Firmicutes_A;c__Clostridia;o__Oscillospirales;f__Acutalibacteraceae;g__UBA1417;s__UBA1417 sp003531055	p__Firmicutes_A	2.5e-12	43	311	1	[[68, 376]]	3.5e-12	GUT_GENOME238522	MAG	SRS820588_26	53.15	103656	26.8004	0.0095262
GUT_GENOME237878_01054	Carboxypeptidase G2	d__Bacteria;p__Proteobacteria;c__Gammaproteobacteria;o__Enterobacterales;f__Succinivibrionaceae;g__Succinivibrio;s__Succinivibrio sp003456415	p__Proteobacteria	3.2e-42	141.2	370	1	[[4, 371]]	4.3e-42	GUT_GENOME237878	MAG	SRS476348_77	35.89	103621
GUT_GENOME237878_00410	Succinyl-diaminopimelate desuccinylase	d__Bacteria;p__Proteobacteria;c__Gammaproteobacteria;o__Enterobacterales;f__Succinivibrionaceae;g__Succinivibrio;s__Succinivibrio sp003456415	p__Proteobacteria	1.4e-06	23.7	301	1	[[1, 303]]	2.1e-06	GUT_GENOME237878	MAG	SRS476348_77	35.89	103621
GUT_GENOME256138_01150	Peptidase T	d__Bacteria;p__Firmicutes_B;c__Peptococcia;o__Peptococcales;f__Peptococcaceae;g__UBA7185;s__	p__Firmicutes_B	2.5e-25	86.3	374	1	[[1, 370]]	3.2e-25	GUT_GENOME256138	MAG	XieH_2016__YSZC12003_36702__bin.85	45.62	104093
GUT_GENOME097354_00791	putative succinyl-diaminopimelate desuccinylase	d__Bacteria;p__Actinobacteriota;c__Coriobacteriia;o__Coriobacteriales;f__Coriobacteriaceae;g__Collinsella;s__	p__Actinobacteriota	6.2e-12	41.4	320	1	[[8, 389]]	7.4e-12	GUT_GENOME097354	MAG	GeversD_2014__SKBSTL069__bin.53	59.97	101578
GUT_GENOME239745_01142	putative succinyl-diaminopimelate desuccinylase	d__Bacteria;p__Actinobacteriota;c__Coriobacteriia;o__Coriobacteriales;f__Coriobacteriaceae;g__Collinsella;s__Collinsella sp002232035	p__Actinobacteriota	3e-10	35.9	320	1	[[8, 385]]	3.7e-10	GUT_GENOME239745	Isolate	TF12-2AT	60.05	103696
GUT_GENOME239538_01043	Peptidase T	d__Bacteria;p__Firmicutes_A;c__Clostridia;o__Lachnospirales;f__Lachnospiraceae;g__CAG-95;s__	p__Firmicutes_A	5.8e-10	35.1	255	1	[[26, 368]]	6.5e-10	GUT_GENOME239538	MAG	SRS883032_18	44.99	103678
GUT_GENOME243145_00737	Carboxypeptidase G2	d__Bacteria;p__Proteobacteria;c__Gammaproteobacteria;o__Burkholderiales;f__Burkholderiaceae;g__Cupriavidus;s__Cupriavidus metallidurans	p__Proteobacteria	5.9e-178	589.6	411	1	[[3, 437]]	7.2e-178	GUT_GENOME243145	MAG	VincentC_2016__MM014__bin.9	64.03	103736
GUT_GENOME243145_03334	Acetylornithine deacetylase	d__Bacteria;p__Proteobacteria;c__Gammaproteobacteria;o__Burkholderiales;f__Burkholderiaceae;g__Cupriavidus;s__Cupriavidus metallidurans	p__Proteobacteria	1.5e-10	37.8	274	1	[[1, 323]]	2.1e-10	GUT_GENOME243145	MAG	VincentC_2016__MM014__bin.9	64.03	103736
GUT_GENOME243145_03327	Acetylornithine deacetylase	d__Bacteria;p__Proteobacteria;c__Gammaproteobacteria;o__Burkholderiales;f__Burkholderiaceae;g__Cupriavidus;s__Cupriavidus metallidurans	p__Proteobacteria	6.4e-08	29.1	232	1	[[56, 308]]	1.1e-07	GUT_GENOME243145	MAG	VincentC_2016__MM014__bin.9	64.03	103736
GUT_GENOME095206_01504	Carboxypeptidase G2	d__Bacteria;p__Firmicutes_C;c__Negativicutes;o__Acidaminococcales;f__Acidaminococcaceae;g__Succiniclasticum;s__Succiniclasticum sp900316935	p__Firmicutes_C	3.6e-80	266.4	385	1	[[2, 378]]	4.4e-80	GUT_GENOME095206	MAG	FerrettiP_2018__CA_C10002MS2016FE_t0M15__bin.38	58.61	101259	0.182315	0.0374866
GUT_GENOME095206_01820	Peptidase T	d__Bacteria;p__Firmicutes_C;c__Negativicutes;o__Acidaminococcales;f__Acidaminococcaceae;g__Succiniclasticum;s__Succiniclasticum sp900316935	p__Firmicutes_C	9e-26	87	253	1	[[9, 277]]	1.2e-25	GUT_GENOME095206	MAG	FerrettiP_2018__CA_C10002MS2016FE_t0M15__bin.38	58.61	101259	0.182315	0.0374866
GUT_GENOME095206_01102	Peptidase T	d__Bacteria;p__Firmicutes_C;c__Negativicutes;o__Acidaminococcales;f__Acidaminococcaceae;g__Succiniclasticum;s__Succiniclasticum sp900316935	p__Firmicutes_C	3.9e-23	78.3	335	1	[[1, 351]]	4.7e-23	GUT_GENOME095206	MAG	FerrettiP_2018__CA_C10002MS2016FE_t0M15__bin.38	58.61	101259	0.182315	0.0374866
GUT_GENOME095206_01260	N-acetyl-lysine deacetylase	d__Bacteria;p__Firmicutes_C;c__Negativicutes;o__Acidaminococcales;f__Acidaminococcaceae;g__Succiniclasticum;s__Succiniclasticum sp900316935	p__Firmicutes_C	4.7e-12	41.8	304	1	[[45, 376]]	6.9e-12	GUT_GENOME095206	MAG	FerrettiP_2018__CA_C10002MS2016FE_t0M15__bin.38	58.61	101259	0.182315	0.0374866
GUT_GENOME095943_00580	putative succinyl-diaminopimelate desuccinylase	d__Bacteria;p__Firmicutes;c__Bacilli;o__Lactobacillales;f__Lactobacillaceae;g__Pediococcus;s__Pediococcus acidilactici	p__Firmicutes	2.5e-19	65.8	242	1	[[33, 381]]	2.9e-19	GUT_GENOME095943	Isolate	GCF_000146325	42.13	101296	0.0911577	0.0234828
GUT_GENOME095943_01601	putative succinyl-diaminopimelate desuccinylase	d__Bacteria;p__Firmicutes;c__Bacilli;o__Lactobacillales;f__Lactobacillaceae;g__Pediococcus;s__Pediococcus acidilactici	p__Firmicutes	1.1e-16	57.1	290	1	[[2, 369]]	1.5e-16	GUT_GENOME095943	Isolate	GCF_000146325	42.13	101296	0.0911577	0.0234828
GUT_GENOME094063_01939	Carboxypeptidase G2	d__Bacteria;p__Firmicutes_A;c__Clostridia;o__Christensenellales;f__CAG-74;g__;s__	p__Firmicutes_A	1.2e-49	166.1	376	1	[[2, 366]]	1.6e-49	GUT_GENOME094063	MAG	FengQ_2015__SID530450__bin.40	59.17	101237	0.0911577	0.00624533
GUT_GENOME065504_01271	N-acetyldiaminopimelate deacetylase	d__Bacteria;p__Firmicutes;c__Bacilli;o__Erysipelotrichales;f__Erysipelotrichaceae;g__Absiella;s__	p__Firmicutes	3.8e-10	36.3	228	1	[[34, 319]]	5.1e-10	GUT_GENOME065504	MAG	ERR688640_bin.60	33.05	101008
GUT_GENOME010067_01666	Carboxypeptidase G2	d__Bacteria;p__Firmicutes_A;c__Clostridia;o__Oscillospirales;f__Oscillospiraceae;g__Oscillibacter;s__	p__Firmicutes_A	1.7e-34	115.9	368	1	[[3, 387]]	2.2e-34	GUT_GENOME010067	MAG	Bengtsson-PalmeJ_2015__TRAVELRES54__bin.94	61.78	100439
GUT_GENOME010067_00247	Acetylornithine deacetylase	d__Bacteria;p__Firmicutes_A;c__Clostridia;o__Oscillospirales;f__Oscillospiraceae;g__Oscillibacter;s__	p__Firmicutes_A	1.5e-21	73.2	294	1	[[5, 299]]	2.1e-21	GUT_GENOME010067	MAG	Bengtsson-PalmeJ_2015__TRAVELRES54__bin.94	61.78	100439
GUT_GENOME010067_00553	Peptidase T	d__Bacteria;p__Firmicutes_A;c__Clostridia;o__Oscillospirales;f__Oscillospiraceae;g__Oscillibacter;s__	p__Firmicutes_A	3.7e-13	45.5	267	1	[[1, 294]]	4.8e-13	GUT_GENOME010067	MAG	Bengtsson-PalmeJ_2015__TRAVELRES54__bin.94	61.78	100439
GUT_GENOME185774_00017	putative succinyl-diaminopimelate desuccinylase	d__Bacteria;p__Actinobacteriota;c__Coriobacteriia;o__Coriobacteriales;f__Coriobacteriaceae;g__Collinsella;s__	p__Actinobacteriota	3.2e-10	35.8	304	1	[[11, 392]]	4e-10	GUT_GENOME185774	MAG	SRR4451622_bin.66	60.03	102948
GUT_GENOME098710_02476	Acetylornithine deacetylase	d__Bacteria;p__Firmicutes_A;c__Clostridia;o__Lachnospirales;f__Lachnospiraceae;g__UBA9502;s__	p__Firmicutes_A	8.9e-15	51.3	247	1	[[52, 325]]	1.2e-14	GUT_GENOME098710	MAG	HeQ_2017__SZAXPI029501-104__bin.32	47.26	101619
GUT_GENOME073355_00645	Carboxypeptidase G2	d__Bacteria;p__Proteobacteria;c__Gammaproteobacteria;o__Enterobacterales;f__Succinivibrionaceae;g__Succinivibrio;s__	p__Proteobacteria	8e-43	143.2	367	1	[[1, 371]]	1e-42	GUT_GENOME073355	MAG	ERS396468_4	46.99	101054
GUT_GENOME067489_00970	Peptidase T	d__Bacteria;p__Firmicutes_A;c__Clostridia;o__Oscillospirales;f__Acutalibacteraceae;g__CAG-217;s__CAG-217 sp000436335	p__Firmicutes_A	1.5e-16	56.6	280	1	[[0, 283]]	1.9e-16	GUT_GENOME067489	MAG	ERS235562_15	53.49	101029	13.4002	0.00859181
GUT_GENOME278798_00554	putative succinyl-diaminopimelate desuccinylase	d__Bacteria;p__Actinobacteriota;c__Coriobacteriia;o__Coriobacteriales;f__Coriobacteriaceae;g__Collinsella;s__	p__Actinobacteriota	1.2e-10	36.5	320	1	[[9, 388]]	1.6e-10	GUT_GENOME278798	MAG	ZeeviD_2015__PNP_Main_726__bin.8	60.72	104504
GUT_GENOME283609_00587	Peptidase T	d__Bacteria;p__Firmicutes_A;c__Clostridia;o__Lachnospirales;f__Lachnospiraceae;g__Coprococcus_B;s__	p__Firmicutes_A	1.3e-12	43.5	251	1	[[35, 345]]	1.7e-12	GUT_GENOME283609	MAG	ZellerG_2014__CCIS44743950ST-4-0__bin.12	43.58	104579
GUT_GENOME278449_00962	Carboxypeptidase G2	d__Bacteria;p__Firmicutes_A;c__Clostridia;o__Oscillospirales;f__Oscillospiraceae;g__Oscillibacter;s__	p__Firmicutes_A	1.2e-50	169.2	383	1	[[0, 383]]	1.5e-50	GUT_GENOME278449	MAG	ZeeviD_2015__PNP_Main_707__bin.69	64.7	104500	0.364631	0.00416253
GUT_GENOME192690_01492	putative succinyl-diaminopimelate desuccinylase	d__Bacteria;p__Actinobacteriota;c__Coriobacteriia;o__Coriobacteriales;f__Coriobacteriaceae;g__Collinsella;s__	p__Actinobacteriota	1.6e-11	40	306	1	[[9, 388]]	2e-11	GUT_GENOME192690	MAG	SRR5056939_bin.39	59.85	102991
GUT_GENOME189835_00702	N-formyl-4-amino-5-aminomethyl-2-methylpyrimidine deformylase	d__Bacteria;p__Firmicutes_A;c__Clostridia;o__Peptostreptococcales;f__Anaerovoracaceae;g__UBA1191;s__	p__Firmicutes_A	6.8e-08	27.9	238	1	[[2, 294]]	8.9e-08	GUT_GENOME189835	MAG	SRR5056748_bin.93	43.1	102975
GUT_GENOME185633_00557	putative succinyl-diaminopimelate desuccinylase	d__Bacteria;p__Actinobacteriota;c__Coriobacteriia;o__Coriobacteriales;f__Coriobacteriaceae;g__Collinsella;s__	p__Actinobacteriota	3.1e-12	42.3	320	1	[[9, 388]]	3.8e-12	GUT_GENOME185633	MAG	SRR4451581_bin.24	59.84	102947
GUT_GENOME218891_01320	Succinyl-diaminopimelate desuccinylase	d__Bacteria;p__Bacteroidota;c__Bacteroidia;o__Bacteroidales;f__Rikenellaceae;g__Alistipes;s__	p__Bacteroidota	3e-07	26.4	239	1	[[14, 286]]	4e-07	GUT_GENOME218891	MAG	SRS142505_29	59.55	103279	1.732	0.00974456
GUT_GENOME217006_00222	Peptidase T	d__Bacteria;p__Firmicutes_A;c__Clostridia;o__Oscillospirales;f__Acutalibacteraceae;g__Eubacterium_R;s__	p__Firmicutes_A	4e-10	35.4	268	1	[[3, 276]]	5.8e-10	GUT_GENOME217006	MAG	SRS076929_28	36.77	103241
GUT_GENOME215855_00563	putative succinyl-diaminopimelate desuccinylase	d__Bacteria;p__Actinobacteriota;c__Coriobacteriia;o__Coriobacteriales;f__Coriobacteriaceae;g__Collinsella;s__	p__Actinobacteriota	1.7e-09	33.3	254	1	[[11, 385]]	2e-09	GUT_GENOME215855	MAG	SRS049164_61	59.87	103231
GUT_GENOME218730_00254	Acetylornithine deacetylase	d__Bacteria;p__Actinobacteriota;c__Coriobacteriia;o__Coriobacteriales;f__Coriobacteriaceae;g__Collinsella;s__	p__Actinobacteriota	5.3e-10	35	317	1	[[8, 389]]	6.4e-10	GUT_GENOME218730	MAG	SRS1170843_12	60.25	103274
GUT_GENOME213415_01160	putative succinyl-diaminopimelate desuccinylase	d__Bacteria;p__Actinobacteriota;c__Coriobacteriia;o__Coriobacteriales;f__Coriobacteriaceae;g__Collinsella;s__	p__Actinobacteriota	6.4e-10	34.7	267	1	[[10, 385]]	7.9e-10	GUT_GENOME213415	MAG	SRS013639_45	60.07	103209
GUT_GENOME208505_01121	Peptidase T	d__Bacteria;p__Firmicutes_A;c__Clostridia;o__Oscillospirales;f__Acutalibacteraceae;g__RUG420;s__	p__Firmicutes_A	2.2e-21	72.7	276	1	[[2, 292]]	2.8e-21	GUT_GENOME208505	MAG	SRR6028196_bin.4	54.29	103153
GUT_GENOME064269_00818	Acetylornithine deacetylase	d__Bacteria;p__Actinobacteriota;c__Coriobacteriia;o__Coriobacteriales;f__Coriobacteriaceae;g__Collinsella;s__Collinsella aerofaciens_F	p__Actinobacteriota	2.1e-09	33.1	300	1	[[9, 381]]	2.5e-09	GUT_GENOME064269	MAG	ERR688505_bin.28	60.11	101002	0.273473	0.00625083
GUT_GENOME070485_02083	Acetylornithine deacetylase	d__Bacteria;p__Firmicutes_A;c__Clostridia;o__Lachnospirales;f__Lachnospiraceae;g__Clostridium_M;s__	p__Firmicutes_A	1.6e-16	58	289	1	[[1, 307]]	2e-16	GUT_GENOME070485	MAG	ERS396358_11	50.17	101045
GUT_GENOME070485_02081	N-formyl-4-amino-5-aminomethyl-2-methylpyrimidine deformylase	d__Bacteria;p__Firmicutes_A;c__Clostridia;o__Lachnospirales;f__Lachnospiraceae;g__Clostridium_M;s__	p__Firmicutes_A	4.7e-13	46.5	238	1	[[0, 252]]	7.3e-13	GUT_GENOME070485	MAG	ERS396358_11	50.17	101045
GUT_GENOME070485_04828	Acetylornithine deacetylase	d__Bacteria;p__Firmicutes_A;c__Clostridia;o__Lachnospirales;f__Lachnospiraceae;g__Clostridium_M;s__	p__Firmicutes_A	3.7e-12	43.6	239	1	[[1, 266]]	4.8e-12	GUT_GENOME070485	MAG	ERS396358_11	50.17	101045
GUT_GENOME070485_02066	Acetylornithine deacetylase	d__Bacteria;p__Firmicutes_A;c__Clostridia;o__Lachnospirales;f__Lachnospiraceae;g__Clostridium_M;s__	p__Firmicutes_A	1.5e-09	35	328	1	[[4, 379]]	2.1e-09	GUT_GENOME070485	MAG	ERS396358_11	50.17	101045
GUT_GENOME081169_01430	putative succinyl-diaminopimelate desuccinylase	d__Bacteria;p__Actinobacteriota;c__Coriobacteriia;o__Coriobacteriales;f__Coriobacteriaceae;g__Collinsella;s__	p__Actinobacteriota	6.6e-11	37.9	320	1	[[8, 388]]	8e-11	GUT_GENOME081169	MAG	ERS537202_32	59.73	101099
GUT_GENOME078306_01413	putative succinyl-diaminopimelate desuccinylase	d__Bacteria;p__Firmicutes;c__Bacilli;o__Lactobacillales;f__Lactobacillaceae;g__Lactobacillus_H;s__Lactobacillus_H oris	p__Firmicutes	4.1e-18	61.8	237	1	[[12, 331]]	5.1e-18	GUT_GENOME078306	MAG	ERS473243_37	49.99	101077
GUT_GENOME078306_00201	putative succinyl-diaminopimelate desuccinylase	d__Bacteria;p__Firmicutes;c__Bacilli;o__Lactobacillales;f__Lactobacillaceae;g__Lactobacillus_H;s__Lactobacillus_H oris	p__Firmicutes	1e-15	54	228	1	[[7, 306]]	1.3e-15	GUT_GENOME078306	MAG	ERS473243_37	49.99	101077
GUT_GENOME078306_01169	putative succinyl-diaminopimelate desuccinylase	d__Bacteria;p__Firmicutes;c__Bacilli;o__Lactobacillales;f__Lactobacillaceae;g__Lactobacillus_H;s__Lactobacillus_H oris	p__Firmicutes	3.4e-09	32.4	252	1	[[2, 374]]	3.9e-09	GUT_GENOME078306	MAG	ERS473243_37	49.99	101077
GUT_GENOME283633_00832	putative succinyl-diaminopimelate desuccinylase	d__Bacteria;p__Actinobacteriota;c__Coriobacteriia;o__Coriobacteriales;f__Coriobacteriaceae;g__Collinsella;s__	p__Actinobacteriota	8.8e-10	34.3	301	1	[[9, 386]]	1.1e-09	GUT_GENOME283633	MAG	ZellerG_2014__CCIS44743950ST-4-0__bin.54	60.31	104583
GUT_GENOME279533_00673	Acetylornithine deacetylase	d__Bacteria;p__Bacteroidota;c__Bacteroidia;o__Bacteroidales;f__Bacteroidaceae;g__Prevotella;s__Prevotella sp002481295	p__Bacteroidota	3.6e-14	49.2	229	1	[[27, 294]]	4.6e-14	GUT_GENOME279533	MAG	ZeeviD_2015__PNP_Main_773__bin.32	51.34	104510
GUT_GENOME137680_01124	Succinyl-diaminopimelate desuccinylase	d__Bacteria;p__Bacteroidota;c__Bacteroidia;o__Bacteroidales;f__Rikenellaceae;g__Alistipes;s__	p__Bacteroidota	1.1e-09	34.3	239	1	[[3, 295]]	1.3e-09	GUT_GENOME137680	MAG	NielsenHB_2014__V1_UC26_4__bin.47	60.94	102203	0.364631	0.0435329
GUT_GENOME156849_02039	Carboxypeptidase G2	d__Bacteria;p__Proteobacteria;c__Gammaproteobacteria;o__Burkholderiales;f__Burkholderiaceae;g__Turicimonas;s__	p__Proteobacteria	1.5e-47	159.2	380	1	[[2, 404]]	2e-47	GUT_GENOME156849	MAG	QinN_2014__LD-97__bin.17	44.32	102643
GUT_GENOME156849_01229	Carboxypeptidase G2	d__Bacteria;p__Proteobacteria;c__Gammaproteobacteria;o__Burkholderiales;f__Burkholderiaceae;g__Turicimonas;s__	p__Proteobacteria	7.3e-44	147.1	391	1	[[1, 397]]	9.3e-44	GUT_GENOME156849	MAG	QinN_2014__LD-97__bin.17	44.32	102643
GUT_GENOME156849_01662	Carboxypeptidase G2	d__Bacteria;p__Proteobacteria;c__Gammaproteobacteria;o__Burkholderiales;f__Burkholderiaceae;g__Turicimonas;s__	p__Proteobacteria	3.3e-39	131.7	377	1	[[3, 370]]	4.9e-39	GUT_GENOME156849	MAG	QinN_2014__LD-97__bin.17	44.32	102643
GUT_GENOME156849_01567	N-acetyl-lysine deacetylase	d__Bacteria;p__Proteobacteria;c__Gammaproteobacteria;o__Burkholderiales;f__Burkholderiaceae;g__Turicimonas;s__	p__Proteobacteria	2e-15	53.4	276	1	[[3, 376]]	3.3e-15	GUT_GENOME156849	MAG	QinN_2014__LD-97__bin.17	44.32	102643
GUT_GENOME155809_00096	Carboxypeptidase G2	d__Bacteria;p__Firmicutes_C;c__Negativicutes;o__Veillonellales;f__Veillonellaceae;g__Veillonella;s__	p__Firmicutes_C	1.1e-50	168.6	377	1	[[4, 385]]	1.3e-50	GUT_GENOME155809	MAG	QinN_2014__LD-39__bin.27	44.69	102630
GUT_GENOME155809_00176	putative hydrolase YxeP	d__Bacteria;p__Firmicutes_C;c__Negativicutes;o__Veillonellales;f__Veillonellaceae;g__Veillonella;s__	p__Firmicutes_C	4.2e-09	31.6	231	1	[[93, 351]]	5.8e-09	GUT_GENOME155809	MAG	QinN_2014__LD-39__bin.27	44.69	102630
GUT_GENOME096381_01000	Succinyl-diaminopimelate desuccinylase	d__Bacteria;p__Actinobacteriota;c__Actinobacteria;o__Streptomycetales;f__Streptomycetaceae;g__Streptomyces;s__Streptomyces albus	p__Actinobacteriota	3.3e-07	27.7	283	2	[[1, 254], [287, 359]]	0.0031	GUT_GENOME096381	Isolate	GCF_000411495	72.71	101443
GUT_GENOME096388_00263	Peptidase T	d__Bacteria;p__Firmicutes;c__Bacilli;o__Staphylococcales;f__Salinicoccaceae;g__Nosocomiicoccus;s__Nosocomiicoccus massiliensis	p__Firmicutes	9.8e-15	50.4	307	1	[[0, 355]]	1.1e-14	GUT_GENOME096388	Isolate	GCF_000438455	36.53	101449
GUT_GENOME080309_00035	Acetylornithine deacetylase	d__Bacteria;p__Actinobacteriota;c__Coriobacteriia;o__Coriobacteriales;f__Coriobacteriaceae;g__Collinsella;s__	p__Actinobacteriota	2.3e-11	39.6	320	1	[[9, 387]]	2.9e-11	GUT_GENOME080309	MAG	ERS473404_9	59.85	101092	0.0911577	0.00669347
GUT_GENOME242337_03112	Acetylornithine deacetylase	d__Bacteria;p__Proteobacteria;c__Gammaproteobacteria;o__Enterobacterales;f__Enterobacteriaceae;g__Serratia;s__Serratia liquefaciens	p__Proteobacteria	2.6e-13	47.3	230	1	[[1, 234]]	3.6e-13	GUT_GENOME242337	MAG	VatanenT_2016__G80472__bin.3	55.4	103712
GUT_GENOME241809_01853	putative succinyl-diaminopimelate desuccinylase	d__Bacteria;p__Firmicutes;c__Bacilli;o__Lactobacillales;f__Lactobacillaceae;g__Lactobacillus_E;s__Lactobacillus_E coryniformis	p__Firmicutes	3.2e-18	62.4	271	1	[[2, 355]]	3.8e-18	GUT_GENOME241809	MAG	VatanenT_2016__G80364__bin.8	43.36	103710
GUT_GENOME241809_00091	putative succinyl-diaminopimelate desuccinylase	d__Bacteria;p__Firmicutes;c__Bacilli;o__Lactobacillales;f__Lactobacillaceae;g__Lactobacillus_E;s__Lactobacillus_E coryniformis	p__Firmicutes	1.1e-15	54	269	1	[[0, 276]]	1.3e-15	GUT_GENOME241809	MAG	VatanenT_2016__G80364__bin.8	43.36	103710
GUT_GENOME241809_00517	putative succinyl-diaminopimelate desuccinylase	d__Bacteria;p__Firmicutes;c__Bacilli;o__Lactobacillales;f__Lactobacillaceae;g__Lactobacillus_E;s__Lactobacillus_E coryniformis	p__Firmicutes	8.8e-14	47.8	284	1	[[23, 375]]	1e-13	GUT_GENOME241809	MAG	VatanenT_2016__G80364__bin.8	43.36	103710
GUT_GENOME241809_01922	putative succinyl-diaminopimelate desuccinylase	d__Bacteria;p__Firmicutes;c__Bacilli;o__Lactobacillales;f__Lactobacillaceae;g__Lactobacillus_E;s__Lactobacillus_E coryniformis	p__Firmicutes	4.3e-12	42.2	295	1	[[20, 379]]	5e-12	GUT_GENOME241809	MAG	VatanenT_2016__G80364__bin.8	43.36	103710
GUT_GENOME161819_00964	putative succinyl-diaminopimelate desuccinylase	d__Bacteria;p__Actinobacteriota;c__Coriobacteriia;o__Coriobacteriales;f__Coriobacteriaceae;g__Collinsella;s__	p__Actinobacteriota	3.9e-11	38.7	306	1	[[9, 386]]	4.8e-11	GUT_GENOME161819	MAG	SchirmerM_2016__G88963__bin.20	60.01	102742
GUT_GENOME162087_00124	putative succinyl-diaminopimelate desuccinylase	d__Bacteria;p__Actinobacteriota;c__Coriobacteriia;o__Coriobacteriales;f__Coriobacteriaceae;g__Collinsella;s__	p__Actinobacteriota	3e-11	39.1	317	1	[[8, 385]]	3.7e-11	GUT_GENOME162087	MAG	SchirmerM_2016__G88995__bin.21	59.88	102748
GUT_GENOME161956_00748	putative succinyl-diaminopimelate desuccinylase	d__Bacteria;p__Actinobacteriota;c__Coriobacteriia;o__Coriobacteriales;f__Coriobacteriaceae;g__Collinsella;s__	p__Actinobacteriota	3.6e-11	38.7	306	1	[[9, 386]]	4.5e-11	GUT_GENOME161956	MAG	SchirmerM_2016__G88980__bin.10	60.17	102746
GUT_GENOME140236_03062	Acetylornithine deacetylase	d__Bacteria;p__Firmicutes_A;c__Clostridia;o__Lachnospirales;f__Lachnospiraceae;g__UBA9502;s__	p__Firmicutes_A	2.8e-21	73	302	1	[[9, 372]]	3.4e-21	GUT_GENOME140236	Isolate	OM02-18AC	47.55	102280
GUT_GENOME138470_00149	Carboxypeptidase G2	d__Bacteria;p__Firmicutes_A;c__Clostridia;o__Oscillospirales;f__Oscillospiraceae;g__;s__	p__Firmicutes_A	5.5e-37	124.4	302	1	[[1, 323]]	8.6e-37	GUT_GENOME138470	MAG	NielsenHB_2014__V1_UC50_1__bin.57	58.01	102213	0.0911577	0.00612397
GUT_GENOME140003_02025	putative hydrolase YxeP	d__Bacteria;p__Firmicutes_A;c__Clostridia;o__Oscillospirales;f__Ruminococcaceae;g__;s__	p__Firmicutes_A	1.3e-07	27.3	233	1	[[36, 342]]	2.3e-07	GUT_GENOME140003	MAG	Obregon-TitoAJ_2015__SM43__bin.36	45.66	102264
GUT_GENOME139646_00105	N-formyl-4-amino-5-aminomethyl-2-methylpyrimidine deformylase	d__Bacteria;p__Firmicutes_A;c__Clostridia;o__Oscillospirales;f__Oscillospiraceae;g__CAG-110;s__	p__Firmicutes_A	4.2e-09	31.8	230	1	[[27, 293]]	5.6e-09	GUT_GENOME139646	MAG	Obregon-TitoAJ_2015__SM02__bin.5	60.73	102238
GUT_GENOME140329_01913	putative succinyl-diaminopimelate desuccinylase	d__Bacteria;p__Firmicutes;c__Bacilli;o__Lactobacillales;f__Vagococcaceae;g__Vagococcus;s__	p__Firmicutes	2.5e-14	49.4	258	1	[[6, 315]]	3.8e-14	GUT_GENOME140329	Isolate	OM08-11BH	33.54	102299
GUT_GENOME243585_02674	Succinyl-diaminopimelate desuccinylase	d__Bacteria;p__Proteobacteria;c__Gammaproteobacteria;o__Xanthomonadales;f__Xanthomonadaceae;g__Stenotrophomonas;s__Stenotrophomonas maltophilia_S	p__Proteobacteria	1.9e-09	34.4	260	1	[[1, 368]]	2.4e-09	GUT_GENOME243585	MAG	VincentC_2016__MM040.1__bin.6	66.56	103761
GUT_GENOME243448_00513	Peptidase T	d__Bacteria;p__Firmicutes_A;c__Clostridia;o__Peptostreptococcales;f__Filifactoraceae;g__Criibacterium;s__Criibacterium bergeronii	p__Firmicutes_A	5.9e-20	67.9	265	1	[[1, 354]]	6.7e-20	GUT_GENOME243448	MAG	VincentC_2016__MM032.1__bin.10	32.72	103753
GUT_GENOME243448_00701	Hippurate hydrolase	d__Bacteria;p__Firmicutes_A;c__Clostridia;o__Peptostreptococcales;f__Filifactoraceae;g__Criibacterium;s__Criibacterium bergeronii	p__Firmicutes_A	9.3e-09	30.9	246	1	[[24, 289]]	1.2e-08	GUT_GENOME243448	MAG	VincentC_2016__MM032.1__bin.10	32.72	103753
GUT_GENOME240252_00318	Peptidase T	d__Bacteria;p__Firmicutes_A;c__Clostridia;o__Eubacteriales;f__Garciellaceae;g__Garciella;s__	p__Firmicutes_A	1.2e-19	67.3	245	1	[[2, 367]]	1.4e-19	GUT_GENOME240252	MAG	VatanenT_2016__G78545__bin.2	33.66	103705
GUT_GENOME240252_00328	putative succinyl-diaminopimelate desuccinylase	d__Bacteria;p__Firmicutes_A;c__Clostridia;o__Eubacteriales;f__Garciellaceae;g__Garciella;s__	p__Firmicutes_A	1e-08	31.2	253	1	[[41, 326]]	1.3e-08	GUT_GENOME240252	MAG	VatanenT_2016__G78545__bin.2	33.66	103705
GUT_GENOME243849_00580	Carboxypeptidase G2	d__Bacteria;p__Firmicutes_C;c__Negativicutes;o__Veillonellales;f__Negativicoccaceae;g__;s__	p__Firmicutes_C	4.3e-57	189.4	379	1	[[1, 372]]	5.7e-57	GUT_GENOME243849	MAG	VincentC_2016__MM058.1__bin.24	57.44	103772
GUT_GENOME243849_00577	Peptidase T	d__Bacteria;p__Firmicutes_C;c__Negativicutes;o__Veillonellales;f__Negativicoccaceae;g__;s__	p__Firmicutes_C	8.2e-22	73	247	1	[[2, 343]]	9.8e-22	GUT_GENOME243849	MAG	VincentC_2016__MM058.1__bin.24	57.44	103772
GUT_GENOME011515_01662	putative hydrolase YxeP	d__Bacteria;p__Firmicutes_A;c__Clostridia;o__Oscillospirales;f__Oscillospiraceae;g__Oscillibacter;s__	p__Firmicutes_A	1.4e-07	27	255	1	[[33, 357]]	1.8e-07	GUT_GENOME011515	MAG	BritoIL_2016__M1.29.ST__bin.57	59.63	100474	0.0911577	0.00550792
GUT_GENOME011515_00046	Succinyl-diaminopimelate desuccinylase	d__Bacteria;p__Firmicutes_A;c__Clostridia;o__Oscillospirales;f__Oscillospiraceae;g__Oscillibacter;s__	p__Firmicutes_A	6.9e-07	24.8	256	2	[[1, 237], [307, 359]]	9.2e-06	GUT_GENOME011515	MAG	BritoIL_2016__M1.29.ST__bin.57	59.63	100474	0.0911577	0.00550792
GUT_GENOME088178_00314	putative succinyl-diaminopimelate desuccinylase	d__Bacteria;p__Actinobacteriota;c__Coriobacteriia;o__Coriobacteriales;f__Coriobacteriaceae;g__Collinsella;s__	p__Actinobacteriota	3e-12	42.4	320	1	[[8, 388]]	3.7e-12	GUT_GENOME088178	MAG	ERS608525_9	60.26	101161
GUT_GENOME207955_02257	Carboxypeptidase G2	d__Bacteria;p__Proteobacteria;c__Gammaproteobacteria;o__Enterobacterales;f__Aeromonadaceae;g__Aeromonas;s__Aeromonas rivipollensis	p__Proteobacteria	6.4e-48	161.2	379	1	[[5, 379]]	8.1e-48	GUT_GENOME207955	MAG	SRR5963315_bin.2	62.1	103144
GUT_GENOME212645_02923	putative hydrolase YxeP	d__Bacteria;p__Firmicutes_A;c__Clostridia;o__Lachnospirales;f__Lachnospiraceae;g__UBA5416;s__	p__Firmicutes_A	1.2e-06	24.9	260	1	[[33, 311]]	1.7e-06	GUT_GENOME212645	MAG	SRR769526_bin.2	42.85	103192	1.00273	0.0101918
GUT_GENOME206546_00985	putative succinyl-diaminopimelate desuccinylase	d__Bacteria;p__Actinobacteriota;c__Coriobacteriia;o__Coriobacteriales;f__Coriobacteriaceae;g__Collinsella;s__	p__Actinobacteriota	3.4e-11	39	320	1	[[8, 391]]	4.3e-11	GUT_GENOME206546	MAG	SRR5580081_bin.8	60.1	103101
GUT_GENOME208855_01092	putative succinyl-diaminopimelate desuccinylase	d__Bacteria;p__Actinobacteriota;c__Coriobacteriia;o__Coriobacteriales;f__Coriobacteriaceae;g__Collinsella;s__	p__Actinobacteriota	3.2e-07	25.6	245	1	[[0, 306]]	3.5e-07	GUT_GENOME208855	MAG	SRR6028264_bin.14	59.99	103157
GUT_GENOME096532_02763	Peptidase T	d__Bacteria;p__Firmicutes_I;c__Bacilli_A;o__Paenibacillales;f__Paenibacillaceae;g__Paenibacillus_A;s__Paenibacillus_A rubinfantis	p__Firmicutes_I	1e-18	65.2	271	1	[[2, 276]]	1.3e-18	GUT_GENOME096532	Isolate	GCF_001486505	53.02	101525
GUT_GENOME215200_01677	Acetylornithine deacetylase	d__Bacteria;p__Actinobacteriota;c__Coriobacteriia;o__Coriobacteriales;f__Coriobacteriaceae;g__Collinsella;s__	p__Actinobacteriota	2.8e-09	32.7	317	1	[[8, 388]]	3.5e-09	GUT_GENOME215200	MAG	SRS023715_33	60.18	103225
GUT_GENOME221775_00128	putative succinyl-diaminopimelate desuccinylase	d__Bacteria;p__Firmicutes_A;c__Clostridia;o__Oscillospirales;f__Oscillospiraceae;g__;s__	p__Firmicutes_A	2.6e-18	62	321	1	[[36, 382]]	3.6e-18	GUT_GENOME221775	MAG	SRS1596848_99	57.01	103297
GUT_GENOME091116_00227	putative succinyl-diaminopimelate desuccinylase	d__Bacteria;p__Actinobacteriota;c__Coriobacteriia;o__Coriobacteriales;f__Coriobacteriaceae;g__Collinsella;s__	p__Actinobacteriota	3.1e-10	35.8	322	1	[[9, 385]]	4e-10	GUT_GENOME091116	MAG	FengQ_2015__SID31159__bin.6	60.06	101188
GUT_GENOME082534_00968	Carboxypeptidase G2	d__Bacteria;p__Firmicutes_A;c__Clostridia;o__Lachnospirales;f__Lachnospiraceae;g__Roseburia;s__	p__Firmicutes_A	8.1e-41	136.2	386	1	[[2, 386]]	1e-40	GUT_GENOME082534	MAG	ERS537253_47	46.57	101111
GUT_GENOME082534_00970	Peptidase T	d__Bacteria;p__Firmicutes_A;c__Clostridia;o__Lachnospirales;f__Lachnospiraceae;g__Roseburia;s__	p__Firmicutes_A	1.8e-10	36.1	274	1	[[1, 371]]	2e-10	GUT_GENOME082534	MAG	ERS537253_47	46.57	101111
GUT_GENOME083463_01731	putative succinyl-diaminopimelate desuccinylase	d__Bacteria;p__Actinobacteriota;c__Coriobacteriia;o__Coriobacteriales;f__Coriobacteriaceae;g__Collinsella;s__	p__Actinobacteriota	6.2e-11	38.1	319	1	[[8, 363]]	8.1e-11	GUT_GENOME083463	MAG	ERS537286_63	59.79	101121
GUT_GENOME090701_01915	Acetylornithine deacetylase	d__Bacteria;p__Bacteroidota;c__Bacteroidia;o__Bacteroidales;f__Muribaculaceae;g__Muribaculum;s__Muribaculum sp001701195	p__Bacteroidota	3e-12	42.9	229	1	[[23, 273]]	3.9e-12	GUT_GENOME090701	MAG	ERS631827_89	48.71	101180	0.0911577	0.00289804
GUT_GENOME171682_03490	Carboxypeptidase G2	d__Bacteria;p__Firmicutes_A;c__Clostridia;o__Lachnospirales;f__Lachnospiraceae;g__Clostridium_M;s__	p__Firmicutes_A	1.6e-40	137.1	388	1	[[2, 384]]	2.1e-40	GUT_GENOME171682	MAG	SRR1821190_bin.17	53.43	102829
GUT_GENOME171682_03979	Carboxypeptidase G2	d__Bacteria;p__Firmicutes_A;c__Clostridia;o__Lachnospirales;f__Lachnospiraceae;g__Clostridium_M;s__	p__Firmicutes_A	4e-39	132.5	312	1	[[5, 374]]	5e-39	GUT_GENOME171682	MAG	SRR1821190_bin.17	53.43	102829
GUT_GENOME171682_03986	Acetylornithine deacetylase	d__Bacteria;p__Firmicutes_A;c__Clostridia;o__Lachnospirales;f__Lachnospiraceae;g__Clostridium_M;s__	p__Firmicutes_A	6.1e-12	42.8	263	1	[[75, 385]]	8.9e-12	GUT_GENOME171682	MAG	SRR1821190_bin.17	53.43	102829
GUT_GENOME171682_04864	N-acetyl-lysine deacetylase	d__Bacteria;p__Firmicutes_A;c__Clostridia;o__Lachnospirales;f__Lachnospiraceae;g__Clostridium_M;s__	p__Firmicutes_A	4.8e-11	39.9	304	1	[[52, 377]]	6.5e-11	GUT_GENOME171682	MAG	SRR1821190_bin.17	53.43	102829
GUT_GENOME175534_00918	putative succinyl-diaminopimelate desuccinylase	d__Bacteria;p__Actinobacteriota;c__Coriobacteriia;o__Coriobacteriales;f__Coriobacteriaceae;g__Collinsella;s__Collinsella aerofaciens_F	p__Actinobacteriota	6.8e-10	34.3	251	1	[[5, 324]]	8.3e-10	GUT_GENOME175534	MAG	SRR2992882_bin.22	60.53	102866
GUT_GENOME174855_00916	Acetylornithine deacetylase	d__Bacteria;p__Actinobacteriota;c__Coriobacteriia;o__Coriobacteriales;f__Coriobacteriaceae;g__Collinsella;s__	p__Actinobacteriota	1.2e-12	43.7	321	1	[[8, 388]]	1.5e-12	GUT_GENOME174855	MAG	SRR2912775_bin.30	59.75	102847
GUT_GENOME180088_00094	putative succinyl-diaminopimelate desuccinylase	d__Bacteria;p__Actinobacteriota;c__Coriobacteriia;o__Coriobacteriales;f__Coriobacteriaceae;g__Collinsella;s__	p__Actinobacteriota	1.9e-10	36.4	258	1	[[11, 392]]	2.3e-10	GUT_GENOME180088	MAG	SRR3737015_bin.39	60.54	102923
GUT_GENOME180992_00783	putative succinyl-diaminopimelate desuccinylase	d__Bacteria;p__Actinobacteriota;c__Coriobacteriia;o__Coriobacteriales;f__Coriobacteriaceae;g__Collinsella;s__	p__Actinobacteriota	1.6e-11	39.6	320	1	[[8, 388]]	2e-11	GUT_GENOME180992	MAG	SRR3992988_bin.43	61.23	102929
GUT_GENOME187394_00640	Peptidase T	d__Bacteria;p__Firmicutes_A;c__Clostridia;o__Tissierellales;f__Peptoniphilaceae;g__Peptoniphilus_A;s__Peptoniphilus_A rhinitidis	p__Firmicutes_A	6.1e-13	44.5	290	1	[[1, 359]]	7.7e-13	GUT_GENOME187394	MAG	SRR492197_bin.1	29.92	102959
GUT_GENOME179909_00221	putative succinyl-diaminopimelate desuccinylase	d__Bacteria;p__Actinobacteriota;c__Coriobacteriia;o__Coriobacteriales;f__Coriobacteriaceae;g__Collinsella;s__	p__Actinobacteriota	2.3e-13	45.9	320	1	[[9, 389]]	2.9e-13	GUT_GENOME179909	MAG	SRR3737004_bin.21	60.03	102916
GUT_GENOME158620_01543	Carboxypeptidase G2	d__Bacteria;p__Firmicutes_A;c__Clostridia;o__Oscillospirales;f__Oscillospiraceae;g__;s__	p__Firmicutes_A	1.6e-45	152.4	394	1	[[4, 391]]	2.2e-45	GUT_GENOME158620	MAG	RaymondF_2016__P21E90__bin.35	61.03	102696
GUT_GENOME096494_02835	Peptidase T	d__Bacteria;p__Firmicutes;c__Bacilli;o__Bacillales;f__Bacillaceae_A;g__Bacillus_AD;s__Bacillus_AD testis	p__Firmicutes	3e-18	63.3	277	1	[[1, 289]]	4.2e-18	GUT_GENOME096494	Isolate	GCF_001243895	42.77	101498
GUT_GENOME268069_00612	putative succinyl-diaminopimelate desuccinylase	d__Bacteria;p__Actinobacteriota;c__Coriobacteriia;o__Coriobacteriales;f__Coriobacteriaceae;g__Collinsella;s__	p__Actinobacteriota	4.3e-11	38.7	306	1	[[9, 386]]	5.3e-11	GUT_GENOME268069	MAG	ZeeviD_2015__PNP_Main_212__bin.28	59.73	104335
GUT_GENOME268758_01313	putative succinyl-diaminopimelate desuccinylase	d__Bacteria;p__Actinobacteriota;c__Coriobacteriia;o__Coriobacteriales;f__Coriobacteriaceae;g__Collinsella;s__	p__Actinobacteriota	6.4e-11	37.7	251	1	[[11, 337]]	7.7e-11	GUT_GENOME268758	MAG	ZeeviD_2015__PNP_Main_239__bin.11	60.61	104346
GUT_GENOME267498_00667	putative succinyl-diaminopimelate desuccinylase	d__Bacteria;p__Actinobacteriota;c__Coriobacteriia;o__Coriobacteriales;f__Coriobacteriaceae;g__Collinsella;s__	p__Actinobacteriota	4.1e-10	35.3	265	1	[[11, 388]]	4.9e-10	GUT_GENOME267498	MAG	ZeeviD_2015__PNP_Main_189__bin.12	60.3	104331
GUT_GENOME265968_01765	Peptidase T	d__Bacteria;p__Fusobacteriota;c__Fusobacteriia;o__Fusobacteriales;f__Fusobacteriaceae;g__Fusobacterium_B;s__	p__Fusobacteriota	1.2e-09	34	333	1	[[1, 359]]	1.6e-09	GUT_GENOME265968	MAG	ZeeviD_2015__PNP_Main_130__bin.27	31.26	104309
GUT_GENOME140245_01269	Putative succinyl-diaminopimelate desuccinylase DapE	d__Bacteria;p__Bacteroidota;c__Bacteroidia;o__Bacteroidales;f__Tannerellaceae;g__Parabacteroides;s__Parabacteroides gordonii	p__Bacteroidota	5.8e-09	33.1	236	1	[[23, 306]]	7.1e-09	GUT_GENOME140245	Isolate	OM02-37	44.4	102282	0.0911577	0.00975679
GUT_GENOME140270_00796	Peptidase T	d__Bacteria;p__Firmicutes;c__Bacilli;o__Bacillales;f__Bacillaceae_G;g__Bacillus_A;s__Bacillus_A sp001884105	p__Firmicutes	4.7e-13	46.8	326	1	[[1, 370]]	5.5e-13	GUT_GENOME140270	Isolate	OM04-20	35.52	102288
GUT_GENOME243060_01002	putative succinyl-diaminopimelate desuccinylase	d__Bacteria;p__Actinobacteriota;c__Coriobacteriia;o__Coriobacteriales;f__Coriobacteriaceae;g__Collinsella;s__Collinsella aerofaciens_F	p__Actinobacteriota	1e-11	40.6	320	1	[[9, 388]]	1.2e-11	GUT_GENOME243060	MAG	VincentC_2016__MM008.3__bin.24	60.48	103732
GUT_GENOME243177_01136	putative hydrolase YxeP	d__Bacteria;p__Firmicutes_A;c__Clostridia;o__Tissierellales;f__Ezakiellaceae;g__Fenollaria;s__Fenollaria massiliensis	p__Firmicutes_A	6.8e-07	24.4	251	1	[[23, 360]]	9.1e-07	GUT_GENOME243177	MAG	VincentC_2016__MM017__bin.14	34.45	103738
GUT_GENOME163441_00695	putative succinyl-diaminopimelate desuccinylase	d__Bacteria;p__Actinobacteriota;c__Coriobacteriia;o__Coriobacteriales;f__Coriobacteriaceae;g__Collinsella;s__Collinsella aerofaciens_F	p__Actinobacteriota	1.7e-10	36.7	304	1	[[9, 385]]	2.2e-10	GUT_GENOME163441	MAG	SchirmerM_2016__G89136__bin.8	60.27	102760	0.0911577	0.00674561
GUT_GENOME162735_01080	Acetylornithine deacetylase	d__Bacteria;p__Actinobacteriota;c__Coriobacteriia;o__Coriobacteriales;f__Coriobacteriaceae;g__Collinsella;s__	p__Actinobacteriota	2.9e-12	42.4	321	1	[[8, 393]]	3.6e-12	GUT_GENOME162735	MAG	SchirmerM_2016__G89059__bin.27	60.19	102752
GUT_GENOME084084_00631	putative succinyl-diaminopimelate desuccinylase	d__Bacteria;p__Actinobacteriota;c__Coriobacteriia;o__Coriobacteriales;f__Coriobacteriaceae;g__Collinsella;s__	p__Actinobacteriota	2e-11	39.8	323	1	[[8, 392]]	2.5e-11	GUT_GENOME084084	MAG	ERS537307_5	59.82	101124
GUT_GENOME084084_01109	putative succinyl-diaminopimelate desuccinylase	d__Bacteria;p__Actinobacteriota;c__Coriobacteriia;o__Coriobacteriales;f__Coriobacteriaceae;g__Collinsella;s__	p__Actinobacteriota	3.4e-10	35.7	261	1	[[3, 327]]	4.2e-10	GUT_GENOME084084	MAG	ERS537307_5	59.82	101124
GUT_GENOME081368_01174	putative succinyl-diaminopimelate desuccinylase	d__Bacteria;p__Actinobacteriota;c__Coriobacteriia;o__Coriobacteriales;f__Coriobacteriaceae;g__Collinsella;s__	p__Actinobacteriota	1.3e-09	33.6	323	1	[[8, 383]]	1.7e-09	GUT_GENOME081368	MAG	ERS537210_77	59.7	101105
GUT_GENOME091632_00666	putative succinyl-diaminopimelate desuccinylase	d__Bacteria;p__Actinobacteriota;c__Coriobacteriia;o__Coriobacteriales;f__Coriobacteriaceae;g__Collinsella;s__	p__Actinobacteriota	3.8e-11	37.8	306	1	[[9, 386]]	4.8e-11	GUT_GENOME091632	MAG	FengQ_2015__SID31333__bin.64	60.12	101196
GUT_GENOME085247_01212	putative succinyl-diaminopimelate desuccinylase	d__Bacteria;p__Actinobacteriota;c__Coriobacteriia;o__Coriobacteriales;f__Coriobacteriaceae;g__Collinsella;s__	p__Actinobacteriota	4.2e-12	41.8	276	1	[[10, 393]]	5.2e-12	GUT_GENOME085247	MAG	ERS537348_5	60.1	101140
GUT_GENOME084946_01601	putative succinyl-diaminopimelate desuccinylase	d__Bacteria;p__Actinobacteriota;c__Coriobacteriia;o__Coriobacteriales;f__Coriobacteriaceae;g__Collinsella;s__	p__Actinobacteriota	6.6e-11	37.9	320	1	[[8, 388]]	7.9e-11	GUT_GENOME084946	MAG	ERS537338_25	59.74	101137
GUT_GENOME084378_01078	putative succinyl-diaminopimelate desuccinylase	d__Bacteria;p__Actinobacteriota;c__Coriobacteriia;o__Coriobacteriales;f__Coriobacteriaceae;g__Collinsella;s__	p__Actinobacteriota	2.8e-11	39.2	320	1	[[8, 388]]	3.5e-11	GUT_GENOME084378	MAG	ERS537317_5	59.89	101130
GUT_GENOME140053_00176	Peptidase T	d__Bacteria;p__Firmicutes;c__Bacilli;o__Lactobacillales;f__Enterococcaceae;g__Enterococcus_A;s__Enterococcus_A avium	p__Firmicutes	1.9e-15	54.3	274	1	[[0, 271]]	2.5e-15	GUT_GENOME140053	Isolate	OF02-3AC	38.87	102270
GUT_GENOME140304_00298	putative succinyl-diaminopimelate desuccinylase	d__Bacteria;p__Actinobacteriota;c__Coriobacteriia;o__Coriobacteriales;f__Coriobacteriaceae;g__Collinsella;s__Collinsella sp002232035	p__Actinobacteriota	3e-10	35.9	320	1	[[8, 385]]	3.6e-10	GUT_GENOME140304	Isolate	OM06-18AC	59.86	102294
GUT_GENOME139713_01469	Succinyl-diaminopimelate desuccinylase	d__Bacteria;p__Spirochaetota;c__Spirochaetia;o__Treponematales;f__Treponemataceae;g__Treponema_D;s__Treponema_D succinifaciens	p__Spirochaetota	1e-11	41	278	1	[[51, 401]]	1.6e-11	GUT_GENOME139713	MAG	Obregon-TitoAJ_2015__SM18__bin.32	39.02	102242	0.0911577	0.130856
GUT_GENOME086272_00136	Carboxypeptidase G2	d__Bacteria;p__Proteobacteria;c__Gammaproteobacteria;o__Burkholderiales;f__Burkholderiaceae;g__Sutterella;s__	p__Proteobacteria	2.2e-40	135.1	375	1	[[3, 370]]	3.1e-40	GUT_GENOME086272	MAG	ERS537384_19	50.66	101147
GUT_GENOME086272_00710	Carboxypeptidase G2	d__Bacteria;p__Proteobacteria;c__Gammaproteobacteria;o__Burkholderiales;f__Burkholderiaceae;g__Sutterella;s__	p__Proteobacteria	4.2e-16	55.1	281	1	[[3, 324]]	5.5e-16	GUT_GENOME086272	MAG	ERS537384_19	50.66	101147
GUT_GENOME081295_00570	Peptidase T	d__Bacteria;p__Firmicutes_B;c__Peptococcia;o__Peptococcales;f__Peptococcaceae;g__UBA7185;s__	p__Firmicutes_B	9.4e-22	74.1	374	1	[[1, 370]]	1.3e-21	GUT_GENOME081295	MAG	ERS537207_88	45.34	101102
GUT_GENOME082101_01565	putative succinyl-diaminopimelate desuccinylase	d__Bacteria;p__Actinobacteriota;c__Coriobacteriia;o__Coriobacteriales;f__Coriobacteriaceae;g__Collinsella;s__	p__Actinobacteriota	5.9e-10	34.7	260	1	[[11, 392]]	6.8e-10	GUT_GENOME082101	MAG	ERS537237_22	59.96	101108
GUT_GENOME091217_01917	Carboxypeptidase G2	d__Bacteria;p__Firmicutes_A;c__Clostridia;o__Peptostreptococcales;f__Anaerovoracaceae;g__;s__	p__Firmicutes_A	6.9e-31	104.2	379	1	[[1, 377]]	9.3e-31	GUT_GENOME091217	MAG	FengQ_2015__SID31223__bin.13	43.1	101191	0.0911577	0.0041675
GUT_GENOME083985_00690	Acetylornithine deacetylase	d__Bacteria;p__Actinobacteriota;c__Coriobacteriia;o__Coriobacteriales;f__Coriobacteriaceae;g__Collinsella;s__	p__Actinobacteriota	1.8e-11	39.5	331	1	[[0, 389]]	2.1e-11	GUT_GENOME083985	MAG	ERS537304_37	60.07	101123
GUT_GENOME179840_00715	Acetylornithine deacetylase	d__Bacteria;p__Actinobacteriota;c__Coriobacteriia;o__Coriobacteriales;f__Coriobacteriaceae;g__Collinsella;s__	p__Actinobacteriota	1.4e-11	40	319	1	[[9, 388]]	1.7e-11	GUT_GENOME179840	MAG	SRR3736999_bin.46	60.35	102915
GUT_GENOME182432_01145	Succinyl-diaminopimelate desuccinylase	d__Bacteria;p__Firmicutes_A;c__Clostridia;o__Oscillospirales;f__Acutalibacteraceae;g__MS4;s__	p__Firmicutes_A	8.9e-10	34.9	245	1	[[23, 289]]	1.2e-09	GUT_GENOME182432	MAG	SRR4305227_bin.5	51.47	102934
GUT_GENOME186025_00986	putative succinyl-diaminopimelate desuccinylase	d__Bacteria;p__Firmicutes_A;c__Clostridia;o__Lachnospirales;f__Lachnospiraceae;g__;s__	p__Firmicutes_A	2.3e-14	50.6	258	1	[[10, 307]]	2.9e-14	GUT_GENOME186025	MAG	SRR4481725_bin.46	43.77	102949
GUT_GENOME186025_01734	Acetylornithine deacetylase	d__Bacteria;p__Firmicutes_A;c__Clostridia;o__Lachnospirales;f__Lachnospiraceae;g__;s__	p__Firmicutes_A	1.3e-10	38.2	243	1	[[42, 378]]	1.7e-10	GUT_GENOME186025	MAG	SRR4481725_bin.46	43.77	102949
GUT_GENOME189446_01358	putative succinyl-diaminopimelate desuccinylase	d__Bacteria;p__Actinobacteriota;c__Coriobacteriia;o__Coriobacteriales;f__Coriobacteriaceae;g__Collinsella;s__	p__Actinobacteriota	9.1e-12	40.8	306	1	[[9, 386]]	1.1e-11	GUT_GENOME189446	MAG	SRR5056720_bin.124	59.93	102971
GUT_GENOME192985_00730	Carboxypeptidase G2	d__Bacteria;p__Firmicutes_A;c__Clostridia;o__Lachnospirales;f__Lachnospiraceae;g__Clostridium_M;s__	p__Firmicutes_A	3.5e-46	155.4	367	1	[[3, 389]]	4.5e-46	GUT_GENOME192985	MAG	SRR5056967_bin.2	57.65	102995
GUT_GENOME192985_00744	Carboxypeptidase G2	d__Bacteria;p__Firmicutes_A;c__Clostridia;o__Lachnospirales;f__Lachnospiraceae;g__Clostridium_M;s__	p__Firmicutes_A	2.6e-41	139.4	342	2	[[17, 70], [62, 374]]	5e-40	GUT_GENOME192985	MAG	SRR5056967_bin.2	57.65	102995
GUT_GENOME192985_01177	N-acetyl-lysine deacetylase	d__Bacteria;p__Firmicutes_A;c__Clostridia;o__Lachnospirales;f__Lachnospiraceae;g__Clostridium_M;s__	p__Firmicutes_A	1.2e-09	35	236	2	[[58, 281], [313, 394]]	7.5e-09	GUT_GENOME192985	MAG	SRR5056967_bin.2	57.65	102995
GUT_GENOME192985_01514	Acetylornithine deacetylase	d__Bacteria;p__Firmicutes_A;c__Clostridia;o__Lachnospirales;f__Lachnospiraceae;g__Clostridium_M;s__	p__Firmicutes_A	1.2e-07	28.4	291	1	[[52, 406]]	1.6e-07	GUT_GENOME192985	MAG	SRR5056967_bin.2	57.65	102995
GUT_GENOME178960_00419	putative succinyl-diaminopimelate desuccinylase	d__Bacteria;p__Actinobacteriota;c__Coriobacteriia;o__Coriobacteriales;f__Atopobiaceae;g__Lancefieldella;s__Lancefieldella parvula	p__Actinobacteriota	1.6e-06	23	244	1	[[81, 374]]	2.2e-06	GUT_GENOME178960	MAG	SRR3498907_bin.1	45.43	102908
GUT_GENOME239582_00397	Succinyl-diaminopimelate desuccinylase	d__Bacteria;p__Spirochaetota;c__Spirochaetia;o__Treponematales;f__Treponemataceae;g__Treponema_D;s__Treponema_D sp002449305	p__Spirochaetota	3.2e-10	36.1	237	1	[[51, 355]]	5.7e-10	GUT_GENOME239582	MAG	SRS883040_30	38.99	103679
GUT_GENOME254013_00831	Succinyl-diaminopimelate desuccinylase	d__Bacteria;p__Bacteroidota;c__Bacteroidia;o__Bacteroidales;f__Bacteroidaceae;g__Bacteroides;s__Bacteroides massiliensis	p__Bacteroidota	1.7e-12	43.8	228	1	[[35, 311]]	2.1e-12	GUT_GENOME254013	MAG	XieH_2016__YSZC12003_36020__bin.16	53.06	104019	0.638104	0.0291653
GUT_GENOME253808_00681	putative succinyl-diaminopimelate desuccinylase	d__Bacteria;p__Actinobacteriota;c__Coriobacteriia;o__Coriobacteriales;f__Coriobacteriaceae;g__Collinsella;s__Collinsella aerofaciens	p__Actinobacteriota	2.8e-12	42.4	320	1	[[8, 388]]	3.5e-12	GUT_GENOME253808	MAG	XieH_2016__YSZC12003_36006__bin.80	60.27	104013
GUT_GENOME254063_01303	Acetylornithine deacetylase	d__Bacteria;p__Bacteroidota;c__Bacteroidia;o__Bacteroidales;f__UBA11471;g__UBA11471;s__	p__Bacteroidota	2.1e-13	46.4	241	1	[[26, 295]]	2.9e-13	GUT_GENOME254063	MAG	XieH_2016__YSZC12003_36033__bin.18	52.7	104021	0.455789	0.00658239
GUT_GENOME187900_00966	putative succinyl-diaminopimelate desuccinylase	d__Bacteria;p__Actinobacteriota;c__Coriobacteriia;o__Coriobacteriales;f__Coriobacteriaceae;g__Collinsella;s__	p__Actinobacteriota	3.4e-10	35.6	300	1	[[9, 390]]	4.3e-10	GUT_GENOME187900	MAG	SRR5032307_bin.12	59.84	102961
GUT_GENOME183568_02389	Peptidase T	d__Bacteria;p__Firmicutes;c__Bacilli;o__Bacillales;f__Sporolactobacillaceae;g__Sporolactobacillus;s__	p__Firmicutes	7.6e-12	41.8	283	1	[[0, 357]]	8.5e-12	GUT_GENOME183568	MAG	SRR4408011_bin.14	50.31	102937
GUT_GENOME189954_01469	Acetylornithine deacetylase	d__Bacteria;p__Actinobacteriota;c__Coriobacteriia;o__Coriobacteriales;f__Coriobacteriaceae;g__Collinsella;s__	p__Actinobacteriota	3.4e-11	39	302	1	[[9, 388]]	4.1e-11	GUT_GENOME189954	MAG	SRR5056759_bin.70	59.95	102978
GUT_GENOME177790_01886	Putative succinyl-diaminopimelate desuccinylase DapE	d__Bacteria;p__Bacteroidota;c__Bacteroidia;o__Bacteroidales;f__Muribaculaceae;g__CAG-279;s__	p__Bacteroidota	4.7e-12	42	243	1	[[38, 308]]	5.9e-12	GUT_GENOME177790	MAG	SRR341608_bin.17	39.63	102905
GUT_GENOME237867_01342	Acetylornithine deacetylase	d__Bacteria;p__Bacteroidota;c__Bacteroidia;o__Bacteroidales;f__Bacteroidaceae;g__Prevotellamassilia;s__	p__Bacteroidota	2.9e-12	42.3	233	1	[[36, 312]]	3.7e-12	GUT_GENOME237867	MAG	SRS476348_1	53.09	103614
GUT_GENOME239690_02849	Peptidase T	d__Bacteria;p__Firmicutes_I;c__Bacilli_A;o__Paenibacillales;f__Paenibacillaceae;g__Paenibacillus;s__Paenibacillus polymyxa	p__Firmicutes_I	2.1e-17	61.1	263	1	[[3, 285]]	3.3e-17	GUT_GENOME239690	Isolate	TF07-21-d	45.49	103687
GUT_GENOME238202_01810	Succinyl-diaminopimelate desuccinylase	d__Bacteria;p__Bacteroidota;c__Bacteroidia;o__Bacteroidales;f__UBA932;g__RC9;s__	p__Bacteroidota	2.6e-08	30	236	1	[[12, 303]]	3.6e-08	GUT_GENOME238202	MAG	SRS476833_14	48.83	103626
GUT_GENOME095247_01095	Carboxypeptidase G2	d__Bacteria;p__Proteobacteria;c__Alphaproteobacteria;o__Sphingomonadales;f__Sphingomonadaceae;g__Sphingomonas;s__Sphingomonas ginsenosidimutans	p__Proteobacteria	4.9e-33	111.9	388	1	[[4, 399]]	6.2e-33	GUT_GENOME095247	MAG	FerrettiP_2018__CA_C10005IS2066FE_t1M15__bin.2	68.87	101262
GUT_GENOME094927_00707	Acetylornithine deacetylase	d__Bacteria;p__Firmicutes_A;c__Clostridia;o__Lachnospirales;f__Lachnospiraceae;g__Clostridium_M;s__	p__Firmicutes_A	2e-06	23.4	296	1	[[5, 387]]	2.8e-06	GUT_GENOME094927	MAG	FengQ_2015__SID531775__bin.38	47.8	101250
GUT_GENOME095942_02749	Carboxypeptidase G2	d__Bacteria;p__Desulfobacterota_A;c__Desulfovibrionia;o__Desulfovibrionales;f__Desulfovibrionaceae;g__Desulfovibrio;s__Desulfovibrio fairfieldensis	p__Desulfobacterota_A	7.9e-48	160.5	385	1	[[1, 398]]	9.9e-48	GUT_GENOME095942	Isolate	GCF_000145315	60.77	101295	0.273473	0.011733
GUT_GENOME095942_02752	Carboxypeptidase G2	d__Bacteria;p__Desulfobacterota_A;c__Desulfovibrionia;o__Desulfovibrionales;f__Desulfovibrionaceae;g__Desulfovibrio;s__Desulfovibrio fairfieldensis	p__Desulfobacterota_A	4.3e-38	128.4	376	1	[[7, 399]]	6e-38	GUT_GENOME095942	Isolate	GCF_000145315	60.77	101295	0.273473	0.011733
GUT_GENOME096553_00061	Succinyl-diaminopimelate desuccinylase	d__Bacteria;p__Actinobacteriota;c__Actinobacteria;o__Mycobacteriales;f__Mycobacteriaceae;g__Corynebacterium;s__Corynebacterium bouchesdurhonense	p__Actinobacteriota	2.1e-11	39.9	270	2	[[0, 240], [290, 398]]	1.2e-09	GUT_GENOME096553	Isolate	GCF_900078305	68.02	101544
GUT_GENOME096497_01698	Succinyl-diaminopimelate desuccinylase	d__Bacteria;p__Firmicutes;c__Bacilli;o__Bacillales;f__Caldibacillaceae;g__Bacillus_J;s__Bacillus_J andreraoultii	p__Firmicutes	6.7e-44	147.8	310	1	[[71, 412]]	7.8e-44	GUT_GENOME096497	Isolate	GCF_001244735	35.42	101501
GUT_GENOME096497_02483	Peptidase T	d__Bacteria;p__Firmicutes;c__Bacilli;o__Bacillales;f__Caldibacillaceae;g__Bacillus_J;s__Bacillus_J andreraoultii	p__Firmicutes	1.3e-15	54.6	271	1	[[2, 342]]	1.6e-15	GUT_GENOME096497	Isolate	GCF_001244735	35.42	101501
GUT_GENOME097137_02598	Carboxypeptidase G2	d__Bacteria;p__Firmicutes_A;c__Clostridia;o__Oscillospirales;f__Oscillospiraceae;g__Oscillibacter;s__	p__Firmicutes_A	5.3e-54	180.8	376	1	[[0, 382]]	6.4e-54	GUT_GENOME097137	MAG	GeversD_2014__SKBSTL042__bin.65	55.75	101576
GUT_GENOME097137_01775	Carboxypeptidase G2	d__Bacteria;p__Firmicutes_A;c__Clostridia;o__Oscillospirales;f__Oscillospiraceae;g__Oscillibacter;s__	p__Firmicutes_A	1.4e-46	156.4	382	1	[[3, 377]]	1.7e-46	GUT_GENOME097137	MAG	GeversD_2014__SKBSTL042__bin.65	55.75	101576
GUT_GENOME097137_01142	Carboxypeptidase G2	d__Bacteria;p__Firmicutes_A;c__Clostridia;o__Oscillospirales;f__Oscillospiraceae;g__Oscillibacter;s__	p__Firmicutes_A	1.3e-43	146.5	324	1	[[7, 383]]	1.5e-43	GUT_GENOME097137	MAG	GeversD_2014__SKBSTL042__bin.65	55.75	101576
GUT_GENOME097137_00261	Carboxypeptidase G2	d__Bacteria;p__Firmicutes_A;c__Clostridia;o__Oscillospirales;f__Oscillospiraceae;g__Oscillibacter;s__	p__Firmicutes_A	4.1e-23	79	327	1	[[103, 432]]	6.1e-23	GUT_GENOME097137	MAG	GeversD_2014__SKBSTL042__bin.65	55.75	101576
GUT_GENOME097711_03042	putative hydrolase YxeP	d__Bacteria;p__Firmicutes_A;c__Clostridia;o__Oscillospirales;f__Oscillospiraceae;g__Intestinimonas;s__	p__Firmicutes_A	1.9e-08	30.6	268	1	[[22, 338]]	2.5e-08	GUT_GENOME097711	MAG	HeQ_2017__RSZAXPI003069-101__bin.14	63.6	101592
GUT_GENOME097711_00784	putative hydrolase YxeP	d__Bacteria;p__Firmicutes_A;c__Clostridia;o__Oscillospirales;f__Oscillospiraceae;g__Intestinimonas;s__	p__Firmicutes_A	1.2e-06	24.8	241	1	[[24, 328]]	1.4e-06	GUT_GENOME097711	MAG	HeQ_2017__RSZAXPI003069-101__bin.14	63.6	101592
GUT_GENOME164334_01964	putative succinyl-diaminopimelate desuccinylase	d__Bacteria;p__Firmicutes;c__Bacilli;o__Lactobacillales;f__Lactobacillaceae;g__Lactobacillus_J;s__Lactobacillus_J harbinensis	p__Firmicutes	2e-15	53.6	260	1	[[6, 331]]	2.5e-15	GUT_GENOME164334	MAG	SRR1196447_bin.20	53.48	102774
GUT_GENOME164334_01146	putative succinyl-diaminopimelate desuccinylase	d__Bacteria;p__Firmicutes;c__Bacilli;o__Lactobacillales;f__Lactobacillaceae;g__Lactobacillus_J;s__Lactobacillus_J harbinensis	p__Firmicutes	3.1e-12	43.1	231	1	[[62, 313]]	4e-12	GUT_GENOME164334	MAG	SRR1196447_bin.20	53.48	102774
GUT_GENOME164334_02840	putative succinyl-diaminopimelate desuccinylase	d__Bacteria;p__Firmicutes;c__Bacilli;o__Lactobacillales;f__Lactobacillaceae;g__Lactobacillus_J;s__Lactobacillus_J harbinensis	p__Firmicutes	5.4e-12	42.3	282	1	[[5, 350]]	7.2e-12	GUT_GENOME164334	MAG	SRR1196447_bin.20	53.48	102774
GUT_GENOME164334_01923	putative succinyl-diaminopimelate desuccinylase	d__Bacteria;p__Firmicutes;c__Bacilli;o__Lactobacillales;f__Lactobacillaceae;g__Lactobacillus_J;s__Lactobacillus_J harbinensis	p__Firmicutes	5e-11	39.1	270	2	[[11, 157], [177, 408]]	7.5e-06	GUT_GENOME164334	MAG	SRR1196447_bin.20	53.48	102774
GUT_GENOME164334_00834	Succinyl-diaminopimelate desuccinylase	d__Bacteria;p__Firmicutes;c__Bacilli;o__Lactobacillales;f__Lactobacillaceae;g__Lactobacillus_J;s__Lactobacillus_J harbinensis	p__Firmicutes	3.2e-07	26.6	300	2	[[4, 212], [287, 446]]	0.0038	GUT_GENOME164334	MAG	SRR1196447_bin.20	53.48	102774
GUT_GENOME163017_00848	Acetylornithine deacetylase	d__Bacteria;p__Actinobacteriota;c__Coriobacteriia;o__Coriobacteriales;f__Coriobacteriaceae;g__Collinsella;s__	p__Actinobacteriota	2e-12	43	327	1	[[8, 392]]	2.5e-12	GUT_GENOME163017	MAG	SchirmerM_2016__G89087__bin.5	60	102755
GUT_GENOME159952_01567	putative succinyl-diaminopimelate desuccinylase	d__Bacteria;p__Actinobacteriota;c__Coriobacteriia;o__Coriobacteriales;f__Coriobacteriaceae;g__Collinsella;s__	p__Actinobacteriota	7.9e-12	40.9	320	1	[[8, 386]]	1e-11	GUT_GENOME159952	MAG	SchirmerM_2016__G88733__bin.18	59.89	102728
GUT_GENOME164155_00643	putative succinyl-diaminopimelate desuccinylase	d__Bacteria;p__Actinobacteriota;c__Coriobacteriia;o__Coriobacteriales;f__Coriobacteriaceae;g__Collinsella;s__	p__Actinobacteriota	1e-11	39.4	265	1	[[9, 384]]	1.2e-11	GUT_GENOME164155	MAG	SchirmerM_2016__G89275__bin.2	59.87	102767
GUT_GENOME211264_00305	Acetylornithine deacetylase	d__Bacteria;p__Proteobacteria;c__Gammaproteobacteria;o__Enterobacterales;f__Enterobacteriaceae;g__Klebsiella;s__Klebsiella quasivariicola	p__Proteobacteria	1.5e-15	54.1	236	1	[[0, 278]]	1.8e-15	GUT_GENOME211264	MAG	SRR6028656_bin.1	56.88	103178
GUT_GENOME207869_07280	Carboxypeptidase G2	d__Bacteria;p__Proteobacteria;c__Alphaproteobacteria;o__Rhizobiales;f__Xanthobacteraceae;g__Bradyrhizobium;s__Bradyrhizobium sp000015165	p__Proteobacteria	8e-120	399.1	411	1	[[3, 423]]	1e-119	GUT_GENOME207869	MAG	SRR5963290_bin.2	64.76	103137
GUT_GENOME207869_04461	Carboxypeptidase G2	d__Bacteria;p__Proteobacteria;c__Alphaproteobacteria;o__Rhizobiales;f__Xanthobacteraceae;g__Bradyrhizobium;s__Bradyrhizobium sp000015165	p__Proteobacteria	1.3e-57	194.1	379	1	[[6, 376]]	1.5e-57	GUT_GENOME207869	MAG	SRR5963290_bin.2	64.76	103137
GUT_GENOME207869_06981	Carboxypeptidase G2	d__Bacteria;p__Proteobacteria;c__Alphaproteobacteria;o__Rhizobiales;f__Xanthobacteraceae;g__Bradyrhizobium;s__Bradyrhizobium sp000015165	p__Proteobacteria	1.1e-36	125.1	379	1	[[6, 376]]	1.6e-36	GUT_GENOME207869	MAG	SRR5963290_bin.2	64.76	103137
GUT_GENOME096283_01658	Carboxypeptidase G2	d__Bacteria;p__Firmicutes;c__Bacilli;o__Bacillales;f__Bacillaceae_A;g__Bacillus_V;s__Bacillus_V massiliosenegalensis	p__Firmicutes	5.2e-69	231	384	1	[[0, 378]]	5.9e-69	GUT_GENOME096283	Isolate	GCF_000311725	37.58	101412
GUT_GENOME096283_02057	Peptidase T	d__Bacteria;p__Firmicutes;c__Bacilli;o__Bacillales;f__Bacillaceae_A;g__Bacillus_V;s__Bacillus_V massiliosenegalensis	p__Firmicutes	3.1e-15	53.7	329	1	[[1, 342]]	3.8e-15	GUT_GENOME096283	Isolate	GCF_000311725	37.58	101412
GUT_GENOME096424_00643	Carboxypeptidase G2	d__Bacteria;p__Proteobacteria;c__Gammaproteobacteria;o__Enterobacterales;f__Enterobacteriaceae;g__Providencia;s__Providencia alcalifaciens_A	p__Proteobacteria	3.1e-64	214.9	371	1	[[3, 375]]	4.3e-64	GUT_GENOME096424	Isolate	GCF_000527275	42.46	101465
GUT_GENOME096406_04252	Carboxypeptidase G2	d__Bacteria;p__Proteobacteria;c__Gammaproteobacteria;o__Pseudomonadales;f__Pseudomonadaceae;g__Pseudomonas_B;s__Pseudomonas_B luteola	p__Proteobacteria	2.6e-105	350.7	408	1	[[2, 415]]	3.3e-105	GUT_GENOME096406	Isolate	GCF_000478505	55.19	101457
GUT_GENOME096292_02896	Succinyl-diaminopimelate desuccinylase	d__Bacteria;p__Bacteroidota;c__Bacteroidia;o__Bacteroidales;f__Rikenellaceae;g__Alistipes;s__Alistipes senegalensis	p__Bacteroidota	2.1e-10	37.2	235	1	[[6, 301]]	2.5e-10	GUT_GENOME096292	Isolate	GCF_000312145	58.4	101420	2.82589	0.0070355
GUT_GENOME096469_01136	Acetylornithine deacetylase	d__Bacteria;p__Actinobacteriota;c__Actinobacteria;o__Actinomycetales;f__Dermatophilaceae;g__Mobilicoccus;s__Mobilicoccus massiliensis	p__Actinobacteriota	2.9e-14	50	240	1	[[37, 325]]	3.9e-14	GUT_GENOME096469	Isolate	GCF_000826525	70.47	101486
GUT_GENOME096430_01049	Putative succinyl-diaminopimelate desuccinylase DapE	d__Bacteria;p__Actinobacteriota;c__Actinobacteria;o__Mycobacteriales;f__Geodermatophilaceae;g__Blastococcus;s__Blastococcus massiliensis	p__Actinobacteriota	7e-09	32.4	237	1	[[25, 321]]	9.9e-09	GUT_GENOME096430	Isolate	GCF_000582785	73.23	101468
GUT_GENOME246951_00353	Acetylornithine deacetylase	d__Bacteria;p__Bacteroidota;c__Bacteroidia;o__Bacteroidales;f__Muribaculaceae;g__CAG-279;s__	p__Bacteroidota	5.1e-12	41.5	292	1	[[5, 308]]	8.4e-12	GUT_GENOME246951	MAG	VogtmannE_2016__MMRS84159866ST-27-0-0__bin.55	45.59	103881
GUT_GENOME244427_01143	Carboxypeptidase G2	d__Bacteria;p__Firmicutes_C;c__Negativicutes;o__Acidaminococcales;f__Acidaminococcaceae;g__Succiniclasticum;s__Succiniclasticum sp900314855	p__Firmicutes_C	1.6e-72	241	380	1	[[0, 378]]	1.7e-72	GUT_GENOME244427	MAG	VogtmannE_2016__MMRS11664448ST-27-0-0__bin.30	59.6	103815	0.182315	0.0375153
GUT_GENOME244427_00856	Peptidase T	d__Bacteria;p__Firmicutes_C;c__Negativicutes;o__Acidaminococcales;f__Acidaminococcaceae;g__Succiniclasticum;s__Succiniclasticum sp900314855	p__Firmicutes_C	2.4e-27	92	274	1	[[2, 304]]	3.2e-27	GUT_GENOME244427	MAG	VogtmannE_2016__MMRS11664448ST-27-0-0__bin.30	59.6	103815	0.182315	0.0375153
GUT_GENOME244427_00228	Peptidase T	d__Bacteria;p__Firmicutes_C;c__Negativicutes;o__Acidaminococcales;f__Acidaminococcaceae;g__Succiniclasticum;s__Succiniclasticum sp900314855	p__Firmicutes_C	4.7e-24	81.2	277	1	[[2, 342]]	5.5e-24	GUT_GENOME244427	MAG	VogtmannE_2016__MMRS11664448ST-27-0-0__bin.30	59.6	103815	0.182315	0.0375153
GUT_GENOME246321_01553	putative succinyl-diaminopimelate desuccinylase	d__Bacteria;p__Actinobacteriota;c__Coriobacteriia;o__Coriobacteriales;f__Coriobacteriaceae;g__Collinsella;s__	p__Actinobacteriota	1.6e-10	36.8	254	1	[[11, 392]]	1.8e-10	GUT_GENOME246321	MAG	VogtmannE_2016__MMRS67247116ST-27-0-0__bin.41	60.01	103862
GUT_GENOME260956_00747	Carboxypeptidase G2	d__Bacteria;p__Actinobacteriota;c__Coriobacteriia;o__Coriobacteriales;f__QAMH01;g__QAMH01;s__	p__Actinobacteriota	1.2e-16	56.8	286	1	[[0, 311]]	1.4e-16	GUT_GENOME260956	MAG	XieH_2016__YSZC12003_37753__bin.68	58.37	104247
GUT_GENOME047195_01089	Carboxypeptidase G2	d__Bacteria;p__Firmicutes_C;c__Negativicutes;o__Acidaminococcales;f__Acidaminococcaceae;g__;s__	p__Firmicutes_C	1e-57	192.3	379	1	[[1, 376]]	1.3e-57	GUT_GENOME047195	MAG	ERR1620358_bin.5	45.3	100927
GUT_GENOME047195_00576	Carboxypeptidase G2	d__Bacteria;p__Firmicutes_C;c__Negativicutes;o__Acidaminococcales;f__Acidaminococcaceae;g__;s__	p__Firmicutes_C	1.8e-57	191.4	384	1	[[5, 385]]	2.2e-57	GUT_GENOME047195	MAG	ERR1620358_bin.5	45.3	100927
GUT_GENOME047195_00781	Carboxypeptidase G2	d__Bacteria;p__Firmicutes_C;c__Negativicutes;o__Acidaminococcales;f__Acidaminococcaceae;g__;s__	p__Firmicutes_C	5e-41	137.2	366	2	[[4, 254], [253, 406]]	6.9e-33	GUT_GENOME047195	MAG	ERR1620358_bin.5	45.3	100927
GUT_GENOME047195_01417	Peptidase T	d__Bacteria;p__Firmicutes_C;c__Negativicutes;o__Acidaminococcales;f__Acidaminococcaceae;g__;s__	p__Firmicutes_C	4.4e-19	64.9	314	1	[[1, 325]]	5.4e-19	GUT_GENOME047195	MAG	ERR1620358_bin.5	45.3	100927
GUT_GENOME045186_02797	Acetylornithine deacetylase	d__Bacteria;p__Firmicutes_A;c__Clostridia;o__Lachnospirales;f__Lachnospiraceae;g__UBA9502;s__	p__Firmicutes_A	6.2e-15	51.9	247	1	[[53, 325]]	8.3e-15	GUT_GENOME045186	MAG	ERR1578662_bin.36	46.22	100909	0.364631	0.00740178
GUT_GENOME049620_00499	putative succinyl-diaminopimelate desuccinylase	d__Bacteria;p__Actinobacteriota;c__Coriobacteriia;o__Coriobacteriales;f__Coriobacteriaceae;g__Collinsella;s__Collinsella aerofaciens_F	p__Actinobacteriota	5.4e-10	34.1	264	1	[[9, 385]]	6.3e-10	GUT_GENOME049620	MAG	ERR1953523_bin.134	59.87	100946
GUT_GENOME237520_00880	Carboxypeptidase G2	d__Bacteria;p__Firmicutes_A;c__Clostridia;o__Oscillospirales;f__Oscillospiraceae;g__Oscillibacter;s__	p__Firmicutes_A	4.4e-28	95.2	360	1	[[2, 381]]	5.7e-28	GUT_GENOME237520	MAG	SRS476292_40	59.81	103589
GUT_GENOME237520_00370	Carboxypeptidase G2	d__Bacteria;p__Firmicutes_A;c__Clostridia;o__Oscillospirales;f__Oscillospiraceae;g__Oscillibacter;s__	p__Firmicutes_A	2.5e-10	36.7	259	1	[[2, 334]]	2.9e-10	GUT_GENOME237520	MAG	SRS476292_40	59.81	103589
GUT_GENOME236871_01906	putative hydrolase YxeP	d__Bacteria;p__Firmicutes_A;c__Clostridia;o__Lachnospirales;f__Lachnospiraceae;g__;s__	p__Firmicutes_A	6.3e-07	25.4	241	1	[[34, 362]]	1e-06	GUT_GENOME236871	MAG	SRS476193_48	40.67	103517
GUT_GENOME236879_01061	Acetylornithine deacetylase	d__Bacteria;p__Bacteroidota;c__Bacteroidia;o__Bacteroidales;f__UBA932;g__RC9;s__	p__Bacteroidota	2.3e-10	36.2	240	1	[[20, 281]]	4.2e-10	GUT_GENOME236879	MAG	SRS476193_5	51.73	103525
GUT_GENOME237426_00075	Carboxypeptidase G2	d__Bacteria;p__Firmicutes_A;c__Clostridia;o__Christensenellales;f__QALW01;g__;s__	p__Firmicutes_A	1.1e-30	102.9	313	1	[[37, 380]]	1.4e-30	GUT_GENOME237426	MAG	SRS476288_58	37.98	103558
GUT_GENOME037311_00232	putative succinyl-diaminopimelate desuccinylase	d__Bacteria;p__Actinobacteriota;c__Coriobacteriia;o__Coriobacteriales;f__Coriobacteriaceae;g__Collinsella;s__	p__Actinobacteriota	5.6e-11	38.3	320	1	[[9, 384]]	7e-11	GUT_GENOME037311	MAG	ERR1190927_bin.13	60	100846
GUT_GENOME033647_00833	Carboxypeptidase G2	d__Bacteria;p__Proteobacteria;c__Gammaproteobacteria;o__Burkholderiales;f__Burkholderiaceae;g__Sutterella;s__	p__Proteobacteria	9.7e-46	152.9	372	1	[[1, 367]]	1.2e-45	GUT_GENOME033647	MAG	ERR1190646_bin.18	62.16	100810	0.546946	0.0111402
GUT_GENOME033647_00577	Carboxypeptidase G2	d__Bacteria;p__Proteobacteria;c__Gammaproteobacteria;o__Burkholderiales;f__Burkholderiaceae;g__Sutterella;s__	p__Proteobacteria	6.1e-44	147	379	1	[[2, 371]]	7.4e-44	GUT_GENOME033647	MAG	ERR1190646_bin.18	62.16	100810	0.546946	0.0111402
GUT_GENOME033647_00355	Carboxypeptidase G2	d__Bacteria;p__Proteobacteria;c__Gammaproteobacteria;o__Burkholderiales;f__Burkholderiaceae;g__Sutterella;s__	p__Proteobacteria	8.3e-40	133.4	407	1	[[3, 418]]	1.1e-39	GUT_GENOME033647	MAG	ERR1190646_bin.18	62.16	100810	0.546946	0.0111402
GUT_GENOME246455_00250	Carboxypeptidase G2	d__Bacteria;p__Firmicutes_C;c__Negativicutes;o__Acidaminococcales;f__Acidaminococcaceae;g__Phascolarctobacterium;s__	p__Firmicutes_C	2.9e-60	201.1	394	1	[[1, 385]]	3.8e-60	GUT_GENOME246455	MAG	VogtmannE_2016__MMRS71238091ST-27-0-0__bin.29	46.32	103868	0.0911577	0.0204428
GUT_GENOME246455_00251	Carboxypeptidase G2	d__Bacteria;p__Firmicutes_C;c__Negativicutes;o__Acidaminococcales;f__Acidaminococcaceae;g__Phascolarctobacterium;s__	p__Firmicutes_C	3.7e-58	194.2	394	1	[[1, 386]]	4.7e-58	GUT_GENOME246455	MAG	VogtmannE_2016__MMRS71238091ST-27-0-0__bin.29	46.32	103868	0.0911577	0.0204428
GUT_GENOME246455_00146	Carboxypeptidase G2	d__Bacteria;p__Firmicutes_C;c__Negativicutes;o__Acidaminococcales;f__Acidaminococcaceae;g__Phascolarctobacterium;s__	p__Firmicutes_C	1.5e-46	155.8	388	2	[[0, 250], [252, 406]]	6.1e-37	GUT_GENOME246455	MAG	VogtmannE_2016__MMRS71238091ST-27-0-0__bin.29	46.32	103868	0.0911577	0.0204428
GUT_GENOME246455_00793	Peptidase T	d__Bacteria;p__Firmicutes_C;c__Negativicutes;o__Acidaminococcales;f__Acidaminococcaceae;g__Phascolarctobacterium;s__	p__Firmicutes_C	6.8e-26	87.8	312	1	[[0, 351]]	8.7e-26	GUT_GENOME246455	MAG	VogtmannE_2016__MMRS71238091ST-27-0-0__bin.29	46.32	103868	0.0911577	0.0204428
GUT_GENOME246455_00956	Peptidase T	d__Bacteria;p__Firmicutes_C;c__Negativicutes;o__Acidaminococcales;f__Acidaminococcaceae;g__Phascolarctobacterium;s__	p__Firmicutes_C	6e-22	74.8	282	1	[[1, 282]]	7.9e-22	GUT_GENOME246455	MAG	VogtmannE_2016__MMRS71238091ST-27-0-0__bin.29	46.32	103868	0.0911577	0.0204428
GUT_GENOME244330_00431	Succinyl-diaminopimelate desuccinylase	d__Bacteria;p__Actinobacteriota;c__Actinobacteria;o__Mycobacteriales;f__Mycobacteriaceae;g__Corynebacterium;s__	p__Actinobacteriota	7.7e-12	41.5	247	2	[[0, 236], [305, 360]]	7.7e-12	GUT_GENOME244330	MAG	VincentC_2016__MM103.1__bin.15	61.25	103806
GUT_GENOME037885_00189	putative succinyl-diaminopimelate desuccinylase	d__Bacteria;p__Actinobacteriota;c__Coriobacteriia;o__Coriobacteriales;f__Coriobacteriaceae;g__Collinsella;s__	p__Actinobacteriota	3.6e-10	35.7	318	1	[[8, 390]]	4.4e-10	GUT_GENOME037885	MAG	ERR1190950_bin.1	59.93	100855
GUT_GENOME033839_00519	putative succinyl-diaminopimelate desuccinylase	d__Bacteria;p__Actinobacteriota;c__Coriobacteriia;o__Coriobacteriales;f__Coriobacteriaceae;g__Collinsella;s__	p__Actinobacteriota	7.2e-11	37.7	330	1	[[8, 392]]	9.3e-11	GUT_GENOME033839	MAG	ERR1190655_bin.40	59.84	100812
GUT_GENOME109882_01520	Acetylornithine deacetylase	d__Bacteria;p__Proteobacteria;c__Alphaproteobacteria;o__RF32;f__UBA3637;g__UBA7488;s__UBA7488 sp002477185	p__Proteobacteria	2.9e-22	75.3	230	1	[[26, 275]]	4e-22	GUT_GENOME109882	MAG	LeChatelierE_2013__MH0145__bin.63	41.41	101796
GUT_GENOME108785_01225	Carboxypeptidase G2	d__Bacteria;p__Firmicutes_C;c__Negativicutes;o__Acidaminococcales;f__Acidaminococcaceae;g__Phascolarctobacterium;s__	p__Firmicutes_C	4e-49	163.7	380	2	[[4, 250], [254, 409]]	2.2e-38	GUT_GENOME108785	MAG	LeChatelierE_2013__MH0092__bin.23	43.63	101778
GUT_GENOME108785_01421	Peptidase T	d__Bacteria;p__Firmicutes_C;c__Negativicutes;o__Acidaminococcales;f__Acidaminococcaceae;g__Phascolarctobacterium;s__	p__Firmicutes_C	2.6e-19	65.4	256	1	[[1, 355]]	3.3e-19	GUT_GENOME108785	MAG	LeChatelierE_2013__MH0092__bin.23	43.63	101778
GUT_GENOME108785_00729	Peptidase T	d__Bacteria;p__Firmicutes_C;c__Negativicutes;o__Acidaminococcales;f__Acidaminococcaceae;g__Phascolarctobacterium;s__	p__Firmicutes_C	2.4e-18	62.2	256	1	[[18, 275]]	3.2e-18	GUT_GENOME108785	MAG	LeChatelierE_2013__MH0092__bin.23	43.63	101778
GUT_GENOME105800_00645	putative succinyl-diaminopimelate desuccinylase	d__Bacteria;p__Actinobacteriota;c__Coriobacteriia;o__Coriobacteriales;f__Coriobacteriaceae;g__Collinsella;s__	p__Actinobacteriota	1.5e-11	40.1	320	1	[[9, 385]]	1.9e-11	GUT_GENOME105800	MAG	KarlssonFH_2013__S497__bin.48	60.16	101744
GUT_GENOME235154_00542	N-acetyl-lysine deacetylase	d__Bacteria;p__Firmicutes_A;c__Clostridia;o__Christensenellales;f__QALW01;g__;s__	p__Firmicutes_A	3e-09	31.9	300	1	[[38, 358]]	3.7e-09	GUT_GENOME235154	MAG	SRS476047_87	41.84	103474
GUT_GENOME070341_01018	Succinyl-diaminopimelate desuccinylase	d__Bacteria;p__Bacteroidota;c__Bacteroidia;o__Bacteroidales;f__Bacteroidaceae;g__Prevotella;s__Prevotella sp000436595	p__Bacteroidota	7.4e-10	35.2	235	1	[[26, 308]]	9.5e-10	GUT_GENOME070341	MAG	ERS396353_33	48.54	101042	0.455789	0.0328689
GUT_GENOME108274_00400	Acetylornithine deacetylase	d__Bacteria;p__Bacteroidota;c__Bacteroidia;o__Bacteroidales;f__Bacteroidaceae;g__CAG-617;s__CAG-617 sp000438115	p__Bacteroidota	8.3e-13	43.7	231	1	[[4, 241]]	1.1e-12	GUT_GENOME108274	MAG	LeChatelierE_2013__MH0055__bin.38	52.62	101771	0.364631	0.0186063
GUT_GENOME047344_01157	putative succinyl-diaminopimelate desuccinylase	d__Bacteria;p__Actinobacteriota;c__Coriobacteriia;o__Coriobacteriales;f__Coriobacteriaceae;g__Collinsella;s__	p__Actinobacteriota	2.9e-11	39	322	1	[[8, 383]]	3.6e-11	GUT_GENOME047344	MAG	ERR1620376_bin.17	60.28	100928
GUT_GENOME059153_00426	putative succinyl-diaminopimelate desuccinylase	d__Bacteria;p__Actinobacteriota;c__Coriobacteriia;o__Coriobacteriales;f__Coriobacteriaceae;g__Collinsella;s__	p__Actinobacteriota	6.7e-11	37.9	305	1	[[9, 329]]	9.2e-11	GUT_GENOME059153	MAG	ERR525759_bin.21	60.01	100981
GUT_GENOME045895_00801	Carboxypeptidase G2	d__Bacteria;p__Proteobacteria;c__Gammaproteobacteria;o__Burkholderiales;f__Burkholderiaceae;g__Sutterella;s__	p__Proteobacteria	1.3e-42	142.8	379	1	[[2, 371]]	1.5e-42	GUT_GENOME045895	MAG	ERR1620285_bin.6	61.28	100918
GUT_GENOME045895_00645	Carboxypeptidase G2	d__Bacteria;p__Proteobacteria;c__Gammaproteobacteria;o__Burkholderiales;f__Burkholderiaceae;g__Sutterella;s__	p__Proteobacteria	1.4e-38	129.5	381	1	[[24, 417]]	1.8e-38	GUT_GENOME045895	MAG	ERR1620285_bin.6	61.28	100918
GUT_GENOME045330_00331	putative succinyl-diaminopimelate desuccinylase	d__Bacteria;p__Actinobacteriota;c__Coriobacteriia;o__Coriobacteriales;f__Coriobacteriaceae;g__Collinsella;s__Collinsella sp002232035	p__Actinobacteriota	4.7e-10	35.2	312	1	[[9, 392]]	6e-10	GUT_GENOME045330	MAG	ERR1578685_bin.31	60.15	100912
GUT_GENOME044257_01042	Peptidase T	d__Bacteria;p__Firmicutes_A;c__Clostridia;o__Christensenellales;f__CAG-138;g__UBA5394;s__	p__Firmicutes_A	1e-10	37.5	286	1	[[25, 354]]	1.3e-10	GUT_GENOME044257	MAG	ERR1305901_bin.42	60.59	100898	0.455789	0.009396
GUT_GENOME032415_00179	putative succinyl-diaminopimelate desuccinylase	d__Bacteria;p__Actinobacteriota;c__Coriobacteriia;o__Coriobacteriales;f__Coriobacteriaceae;g__Collinsella;s__Collinsella sp002232035	p__Actinobacteriota	9.1e-11	37.6	320	1	[[8, 388]]	1.1e-10	GUT_GENOME032415	MAG	ERR1190576_bin.6	60.06	100801
GUT_GENOME036763_00643	putative hydrolase YxeP	d__Bacteria;p__Firmicutes_A;c__Clostridia;o__Clostridiales;f__Clostridiaceae;g__Clostridium;s__	p__Firmicutes_A	3.6e-08	29.5	240	2	[[30, 276], [265, 299]]	8.7e-08	GUT_GENOME036763	MAG	ERR1190903_bin.78	26.81	100839	3.19052	0.00850602
GUT_GENOME035792_00711	putative succinyl-diaminopimelate desuccinylase	d__Bacteria;p__Actinobacteriota;c__Coriobacteriia;o__Coriobacteriales;f__Coriobacteriaceae;g__Collinsella;s__Collinsella sp002232035	p__Actinobacteriota	1.9e-10	36.6	303	1	[[9, 392]]	2.4e-10	GUT_GENOME035792	MAG	ERR1190862_bin.42	59.8	100833
GUT_GENOME038182_01585	putative succinyl-diaminopimelate desuccinylase	d__Bacteria;p__Actinobacteriota;c__Coriobacteriia;o__Coriobacteriales;f__Coriobacteriaceae;g__Collinsella;s__	p__Actinobacteriota	2.9e-09	32.7	252	1	[[11, 390]]	3.4e-09	GUT_GENOME038182	MAG	ERR1190963_bin.31	59.67	100858
GUT_GENOME114679_01265	Acetylornithine deacetylase	d__Bacteria;p__Bacteroidota;c__Bacteroidia;o__Bacteroidales;f__Muribaculaceae;g__Duncaniella;s__Duncaniella sp001689425	p__Bacteroidota	7.3e-11	38.4	264	1	[[3, 294]]	9.7e-11	GUT_GENOME114679	MAG	LeChatelierE_2013__MH0458__bin.21	48.31	101910
GUT_GENOME140045_01749	N-acetyldiaminopimelate deacetylase	d__Bacteria;p__Firmicutes;c__Bacilli;o__Erysipelotrichales;f__Erysipelotrichaceae;g__Absiella;s__	p__Firmicutes	7.8e-09	32.5	254	1	[[34, 331]]	1.1e-08	GUT_GENOME140045	Isolate	OF01-2LB	43.59	102268	0.0911577	0.0165015
GUT_GENOME140045_01747	N-acetyldiaminopimelate deacetylase	d__Bacteria;p__Firmicutes;c__Bacilli;o__Erysipelotrichales;f__Erysipelotrichaceae;g__Absiella;s__	p__Firmicutes	1.5e-07	28.2	257	1	[[32, 332]]	2e-07	GUT_GENOME140045	Isolate	OF01-2LB	43.59	102268	0.0911577	0.0165015
GUT_GENOME260489_00993	Acetylornithine deacetylase	d__Bacteria;p__Actinobacteriota;c__Coriobacteriia;o__Coriobacteriales;f__Eggerthellaceae;g__Senegalimassilia;s__	p__Actinobacteriota	1.9e-08	29.6	257	1	[[1, 344]]	2.3e-08	GUT_GENOME260489	MAG	XieH_2016__YSZC12003_37462__bin.23	62.58	104238
GUT_GENOME260293_02282	Peptidase T	d__Bacteria;p__Firmicutes_A;c__Clostridia;o__Peptostreptococcales;f__Peptostreptococcaceae;g__Terrisporobacter;s__	p__Firmicutes_A	2.6e-23	79.4	385	1	[[1, 370]]	3.3e-23	GUT_GENOME260293	MAG	XieH_2016__YSZC12003_37399__bin.18	27.67	104232	0.546946	0.00640191
GUT_GENOME260293_01528	Peptidase T	d__Bacteria;p__Firmicutes_A;c__Clostridia;o__Peptostreptococcales;f__Peptostreptococcaceae;g__Terrisporobacter;s__	p__Firmicutes_A	1.2e-17	60.7	293	1	[[11, 358]]	1.5e-17	GUT_GENOME260293	MAG	XieH_2016__YSZC12003_37399__bin.18	27.67	104232	0.546946	0.00640191
GUT_GENOME260293_01431	putative hydrolase YxeP	d__Bacteria;p__Firmicutes_A;c__Clostridia;o__Peptostreptococcales;f__Peptostreptococcaceae;g__Terrisporobacter;s__	p__Firmicutes_A	1.5e-07	27.5	272	1	[[29, 327]]	2.1e-07	GUT_GENOME260293	MAG	XieH_2016__YSZC12003_37399__bin.18	27.67	104232	0.546946	0.00640191
GUT_GENOME247455_01295	Peptidase T	d__Bacteria;p__Firmicutes_A;c__Clostridia;o__Lachnospirales;f__Lachnospiraceae;g__Roseburia;s__	p__Firmicutes_A	8e-20	68	275	1	[[2, 317]]	9.7e-20	GUT_GENOME247455	MAG	VogtmannE_2016__MMRS94549160ST-27-0-0__bin.23	44.9	103892	0.0911577	0.0261604
GUT_GENOME115935_00698	Acetylornithine deacetylase	d__Bacteria;p__Bacteroidota;c__Bacteroidia;o__Bacteroidales;f__Bacteroidaceae;g__Prevotella;s__	p__Bacteroidota	3.5e-16	55.7	248	1	[[57, 309]]	4.8e-16	GUT_GENOME115935	MAG	LiJ_2014__MH0323__bin.74	48.41	101933	0.0911577	0.0179538
GUT_GENOME119949_00765	Acetylornithine deacetylase	d__Bacteria;p__Actinobacteriota;c__Coriobacteriia;o__Coriobacteriales;f__Coriobacteriaceae;g__Collinsella;s__	p__Actinobacteriota	3e-11	39.1	320	1	[[8, 387]]	3.7e-11	GUT_GENOME119949	MAG	LiJ_2014__V1.CD1-3-PN__bin.42	60.06	101992
GUT_GENOME106820_01279	putative succinyl-diaminopimelate desuccinylase	d__Bacteria;p__Actinobacteriota;c__Coriobacteriia;o__Coriobacteriales;f__Coriobacteriaceae;g__Collinsella;s__	p__Actinobacteriota	7.1e-09	31.3	262	1	[[10, 356]]	8.4e-09	GUT_GENOME106820	MAG	KosticAD_2015__PRJNA231909.3108330__bin.15	60.06	101759
GUT_GENOME103766_02686	Carboxypeptidase G2	d__Bacteria;p__Proteobacteria;c__Gammaproteobacteria;o__Enterobacterales;f__Enterobacteriaceae;g__Citrobacter;s__Citrobacter portucalensis	p__Proteobacteria	1.1e-48	164	325	1	[[1, 378]]	1.3e-48	GUT_GENOME103766	Isolate	IMG_2773857889	51.91	101705
GUT_GENOME264670_01398	putative succinyl-diaminopimelate desuccinylase	d__Bacteria;p__Actinobacteriota;c__Coriobacteriia;o__Coriobacteriales;f__Coriobacteriaceae;g__Collinsella;s__	p__Actinobacteriota	5.4e-11	38.3	304	1	[[9, 354]]	7e-11	GUT_GENOME264670	MAG	ZeeviD_2015__PNP_DietIntervention_28__bin.18	59.98	104294
GUT_GENOME260957_01409	N-acetyl-lysine deacetylase	d__Bacteria;p__Firmicutes_A;c__Clostridia;o__Oscillospirales;f__Oscillospiraceae;g__CAG-170;s__CAG-170 sp000436735	p__Firmicutes_A	4.7e-08	28.7	310	1	[[52, 368]]	6.4e-08	GUT_GENOME260957	MAG	XieH_2016__YSZC12003_37753__bin.69	58.84	104248	1.27621	0.0101091
GUT_GENOME261579_02508	putative succinyl-diaminopimelate desuccinylase	d__Bacteria;p__Firmicutes_A;c__Clostridia;o__Lachnospirales;f__Lachnospiraceae;g__Dorea;s__	p__Firmicutes_A	2.6e-18	63	305	1	[[6, 362]]	3.2e-18	GUT_GENOME261579	MAG	YuJ_2015__SZAXPI003415-12__bin.34	47.9	104263
GUT_GENOME261579_02505	Acetylornithine deacetylase	d__Bacteria;p__Firmicutes_A;c__Clostridia;o__Lachnospirales;f__Lachnospiraceae;g__Dorea;s__	p__Firmicutes_A	2.1e-09	33.6	233	1	[[3, 252]]	3.2e-09	GUT_GENOME261579	MAG	YuJ_2015__SZAXPI003415-12__bin.34	47.9	104263
GUT_GENOME027890_00041	Carboxypeptidase G2	d__Bacteria;p__Firmicutes_C;c__Negativicutes;o__Veillonellales;f__Dialisteraceae;g__UBA5809;s__UBA5809 sp002417965	p__Firmicutes_C	3.3e-48	160.7	384	1	[[5, 387]]	4.1e-48	GUT_GENOME027890	MAG	DRR042402_bin.18	47.61	100776	0.0911577	0.0093632
GUT_GENOME027890_00040	Carboxypeptidase G2	d__Bacteria;p__Firmicutes_C;c__Negativicutes;o__Veillonellales;f__Dialisteraceae;g__UBA5809;s__UBA5809 sp002417965	p__Firmicutes_C	1.1e-42	142.5	395	1	[[1, 384]]	1.4e-42	GUT_GENOME027890	MAG	DRR042402_bin.18	47.61	100776	0.0911577	0.0093632
GUT_GENOME027890_00669	Carboxypeptidase G2	d__Bacteria;p__Firmicutes_C;c__Negativicutes;o__Veillonellales;f__Dialisteraceae;g__UBA5809;s__UBA5809 sp002417965	p__Firmicutes_C	2e-26	88.9	274	1	[[1, 284]]	2.6e-26	GUT_GENOME027890	MAG	DRR042402_bin.18	47.61	100776	0.0911577	0.0093632
GUT_GENOME026716_00564	Acetylornithine deacetylase	d__Bacteria;p__Actinobacteriota;c__Coriobacteriia;o__Coriobacteriales;f__Coriobacteriaceae;g__Collinsella;s__	p__Actinobacteriota	5e-10	35	268	1	[[9, 392]]	6.1e-10	GUT_GENOME026716	MAG	CosteaPI_2017__SID713B069-11-90-0__bin.3	60.08	100744
GUT_GENOME026466_00586	Peptidase T	d__Bacteria;p__Firmicutes_A;c__Clostridia;o__Oscillospirales;f__Oscillospiraceae;g__Ruminiclostridium_C;s__	p__Firmicutes_A	3.2e-13	45.7	259	1	[[9, 284]]	4.3e-13	GUT_GENOME026466	MAG	CosteaPI_2017__SID713B063-11-90-0__bin.22	66.74	100739
GUT_GENOME000236_01615	Peptidase T	d__Bacteria;p__Firmicutes_A;c__Clostridia;o__Oscillospirales;f__Oscillospiraceae;g__Lawsonibacter;s__Lawsonibacter sp900066645	p__Firmicutes_A	1.3e-19	67.3	273	1	[[1, 369]]	1.8e-19	GUT_GENOME000236	Isolate	14207_7_18	56.38	100059
GUT_GENOME000104_03233	Peptidase T	d__Bacteria;p__Firmicutes_A;c__Clostridia;o__Peptostreptococcales;f__Peptostreptococcaceae;g__Paraclostridium;s__Paraclostridium massiliensis	p__Firmicutes_A	7.4e-25	85	375	1	[[1, 368]]	9.9e-25	GUT_GENOME000104	Isolate	12718_7_9	28.16	100024
GUT_GENOME000104_02708	putative hydrolase YxeP	d__Bacteria;p__Firmicutes_A;c__Clostridia;o__Peptostreptococcales;f__Peptostreptococcaceae;g__Paraclostridium;s__Paraclostridium massiliensis	p__Firmicutes_A	3e-08	30.2	279	1	[[28, 332]]	4.7e-08	GUT_GENOME000104	Isolate	12718_7_9	28.16	100024
GUT_GENOME000220_00800	N-acetyl-lysine deacetylase	d__Bacteria;p__Bacteroidota;c__Bacteroidia;o__Bacteroidales;f__Rikenellaceae;g__Alistipes;s__Alistipes sp002358415	p__Bacteroidota	1.3e-14	50.2	270	1	[[16, 305]]	1.8e-14	GUT_GENOME000220	Isolate	14207_6_12	64.75	100053
GUT_GENOME000147_01478	putative hydrolase YxeP	d__Bacteria;p__Firmicutes;c__Bacilli;o__Haloplasmatales;f__Turicibacteraceae;g__Turicibacter;s__Turicibacter sp001543345	p__Firmicutes	2.3e-06	23.5	272	1	[[33, 324]]	3.6e-06	GUT_GENOME000147	Isolate	13414_6_49	34.23	100037	0.0911577	0.0119598
GUT_GENOME000479_01204	Peptidase T	d__Bacteria;p__Firmicutes_A;c__Clostridia;o__Lachnospirales;f__Lachnospiraceae;g__UBA7160;s__	p__Firmicutes_A	1.2e-15	54.5	242	1	[[6, 271]]	1.8e-15	GUT_GENOME000479	Isolate	20287_6_63	48.29	100092
GUT_GENOME000001_00676	Peptidase T	d__Bacteria;p__Firmicutes_A;c__Clostridia;o__Peptostreptococcales;f__Peptostreptococcaceae;g__GCA-900066495;s__	p__Firmicutes_A	5e-24	82.1	372	1	[[1, 369]]	6.6e-24	GUT_GENOME000001	Isolate	11861_6_55	28.26	100001	0.0911577	0.00809841
GUT_GENOME000001_00106	N-formyl-4-amino-5-aminomethyl-2-methylpyrimidine deformylase	d__Bacteria;p__Firmicutes_A;c__Clostridia;o__Peptostreptococcales;f__Peptostreptococcaceae;g__GCA-900066495;s__	p__Firmicutes_A	1.6e-10	37.6	234	1	[[44, 290]]	2.3e-10	GUT_GENOME000001	Isolate	11861_6_55	28.26	100001	0.0911577	0.00809841
GUT_GENOME000001_00182	putative hydrolase YxeP	d__Bacteria;p__Firmicutes_A;c__Clostridia;o__Peptostreptococcales;f__Peptostreptococcaceae;g__GCA-900066495;s__	p__Firmicutes_A	1e-06	25	276	1	[[30, 329]]	1.5e-06	GUT_GENOME000001	Isolate	11861_6_55	28.26	100001	0.0911577	0.00809841
GUT_GENOME000064_01892	putative succinyl-diaminopimelate desuccinylase	d__Bacteria;p__Firmicutes;c__Bacilli;o__Lactobacillales;f__Lactobacillaceae;g__Lactobacillus_D;s__Lactobacillus_D curvatus	p__Firmicutes	1.7e-11	40	358	2	[[1, 177], [187, 395]]	3.7e-06	GUT_GENOME000064	Isolate	12718_7_56	41.82	100020
GUT_GENOME033131_00190	Acetylornithine deacetylase	d__Bacteria;p__Firmicutes_A;c__Clostridia;o__Oscillospirales;f__Oscillospiraceae;g__Oscillibacter;s__	p__Firmicutes_A	1.5e-19	66.6	262	1	[[3, 276]]	2.1e-19	GUT_GENOME033131	MAG	ERR1190619_bin.67	63.65	100808	0.0911577	0.0051208
GUT_GENOME037425_00869	Carboxypeptidase G2	d__Bacteria;p__Firmicutes_C;c__Negativicutes;o__Acidaminococcales;f__Acidaminococcaceae;g__Acidaminococcus;s__	p__Firmicutes_C	1.1e-46	156	376	1	[[1, 368]]	1.6e-46	GUT_GENOME037425	MAG	ERR1190931_bin.27	50.3	100847
GUT_GENOME037425_00662	Carboxypeptidase G2	d__Bacteria;p__Firmicutes_C;c__Negativicutes;o__Acidaminococcales;f__Acidaminococcaceae;g__Acidaminococcus;s__	p__Firmicutes_C	1.5e-43	145.7	386	1	[[4, 390]]	1.8e-43	GUT_GENOME037425	MAG	ERR1190931_bin.27	50.3	100847
GUT_GENOME037425_00242	Carboxypeptidase G2	d__Bacteria;p__Firmicutes_C;c__Negativicutes;o__Acidaminococcales;f__Acidaminococcaceae;g__Acidaminococcus;s__	p__Firmicutes_C	2.2e-38	128.6	389	1	[[1, 384]]	3.3e-38	GUT_GENOME037425	MAG	ERR1190931_bin.27	50.3	100847
GUT_GENOME037425_00680	Peptidase T	d__Bacteria;p__Firmicutes_C;c__Negativicutes;o__Acidaminococcales;f__Acidaminococcaceae;g__Acidaminococcus;s__	p__Firmicutes_C	3e-16	55.7	373	1	[[0, 365]]	3.6e-16	GUT_GENOME037425	MAG	ERR1190931_bin.27	50.3	100847
GUT_GENOME037425_00409	N-acetyl-lysine deacetylase	d__Bacteria;p__Firmicutes_C;c__Negativicutes;o__Acidaminococcales;f__Acidaminococcaceae;g__Acidaminococcus;s__	p__Firmicutes_C	4.4e-09	32.1	315	1	[[39, 373]]	5.6e-09	GUT_GENOME037425	MAG	ERR1190931_bin.27	50.3	100847
GUT_GENOME035519_01104	putative succinyl-diaminopimelate desuccinylase	d__Bacteria;p__Actinobacteriota;c__Coriobacteriia;o__Coriobacteriales;f__Coriobacteriaceae;g__Collinsella;s__Collinsella sp002232035	p__Actinobacteriota	7.7e-11	37.9	320	1	[[8, 388]]	9.2e-11	GUT_GENOME035519	MAG	ERR1190848_bin.35	60.14	100830
GUT_GENOME036500_01121	Succinyl-diaminopimelate desuccinylase	d__Bacteria;p__Firmicutes_A;c__Clostridia;o__Oscillospirales;f__Oscillospiraceae;g__Oscillibacter;s__	p__Firmicutes_A	1.2e-08	30.7	242	2	[[50, 159], [213, 376]]	1.3e-06	GUT_GENOME036500	MAG	ERR1190896_bin.14	57.37	100837
GUT_GENOME036853_01139	Carboxypeptidase G2	d__Bacteria;p__Proteobacteria;c__Gammaproteobacteria;o__Burkholderiales;f__Burkholderiaceae;g__Sutterella;s__	p__Proteobacteria	5e-44	147.4	372	1	[[1, 367]]	6.6e-44	GUT_GENOME036853	MAG	ERR1190909_bin.32	60	100840
GUT_GENOME036853_01011	Carboxypeptidase G2	d__Bacteria;p__Proteobacteria;c__Gammaproteobacteria;o__Burkholderiales;f__Burkholderiaceae;g__Sutterella;s__	p__Proteobacteria	1e-38	129.9	377	1	[[3, 371]]	1.6e-38	GUT_GENOME036853	MAG	ERR1190909_bin.32	60	100840
GUT_GENOME032757_01096	putative succinyl-diaminopimelate desuccinylase	d__Bacteria;p__Actinobacteriota;c__Coriobacteriia;o__Coriobacteriales;f__Coriobacteriaceae;g__Collinsella;s__	p__Actinobacteriota	3.8e-10	35.5	318	1	[[9, 390]]	4.8e-10	GUT_GENOME032757	MAG	ERR1190597_bin.27	60.21	100805
GUT_GENOME210502_00820	putative succinyl-diaminopimelate desuccinylase	d__Bacteria;p__Actinobacteriota;c__Coriobacteriia;o__Coriobacteriales;f__Coriobacteriaceae;g__Collinsella;s__Collinsella aerofaciens_F	p__Actinobacteriota	1e-11	40.6	320	1	[[9, 388]]	1.2e-11	GUT_GENOME210502	MAG	SRR6028536_bin.14	59.98	103173
GUT_GENOME207318_01001	Carboxypeptidase G2	d__Bacteria;p__Firmicutes_A;c__Clostridia;o__Tissierellales;f__Peptoniphilaceae;g__Peptoniphilus_A;s__Peptoniphilus_A harei	p__Firmicutes_A	1.6e-13	46.5	300	1	[[0, 357]]	1.9e-13	GUT_GENOME207318	MAG	SRR5963149_bin.7	34.26	103117
GUT_GENOME096069_01964	putative hydrolase YxeP	d__Bacteria;p__Synergistota;c__Synergistia;o__Synergistales;f__Acetomicrobiaceae;g__Acetomicrobium;s__Acetomicrobium hydrogeniformans	p__Synergistota	3.3e-09	32.6	283	1	[[28, 356]]	4.1e-09	GUT_GENOME096069	Isolate	GCF_000160455	46.53	101339
GUT_GENOME096078_00050	Carboxypeptidase G2	d__Bacteria;p__Proteobacteria;c__Gammaproteobacteria;o__Pseudomonadales;f__Moraxellaceae;g__Acinetobacter;s__Acinetobacter radioresistens	p__Proteobacteria	9.2e-170	562.4	409	1	[[2, 425]]	1.1e-169	GUT_GENOME096078	Isolate	GCF_000162115	41.52	101344
GUT_GENOME096049_01106	putative succinyl-diaminopimelate desuccinylase	d__Bacteria;p__Firmicutes;c__Bacilli;o__Lactobacillales;f__Lactobacillaceae;g__Lactobacillus_G;s__Lactobacillus_G hilgardii	p__Firmicutes	9.4e-12	41.5	231	1	[[43, 332]]	1.3e-11	GUT_GENOME096049	Isolate	GCF_000159175	39.99	101333
GUT_GENOME096049_01981	putative succinyl-diaminopimelate desuccinylase	d__Bacteria;p__Firmicutes;c__Bacilli;o__Lactobacillales;f__Lactobacillaceae;g__Lactobacillus_G;s__Lactobacillus_G hilgardii	p__Firmicutes	1.2e-08	31.2	278	2	[[9, 173], [198, 414]]	0.00018	GUT_GENOME096049	Isolate	GCF_000159175	39.99	101333
GUT_GENOME096243_00311	Carboxypeptidase G2	d__Bacteria;p__Campylobacterota;c__Campylobacteria;o__Campylobacterales;f__Campylobacteraceae;g__Campylobacter_A;s__Campylobacter_A concisus_R	p__Campylobacterota	1.6e-43	145.6	384	1	[[0, 372]]	2e-43	GUT_GENOME096243	Isolate	GCF_000238755	39.55	101392
GUT_GENOME095968_01182	Peptidase T	d__Bacteria;p__Firmicutes_A;c__Clostridia;o__Tissierellales;f__Helcococcaceae;g__Parvimonas;s__Parvimonas micra	p__Firmicutes_A	3.9e-17	58.4	375	1	[[0, 364]]	5.1e-17	GUT_GENOME095968	Isolate	GCF_000154405	28.66	101301
GUT_GENOME096200_02672	Succinyl-diaminopimelate desuccinylase	d__Bacteria;p__Bacteroidota;c__Bacteroidia;o__Bacteroidales;f__Dysgonomonadaceae;g__Dysgonomonas;s__Dysgonomonas gadei	p__Bacteroidota	6e-11	39.3	248	1	[[32, 312]]	7.9e-11	GUT_GENOME096200	Isolate	GCF_000213555	39.61	101376
0.0119373
GUT_GENOME210225_01172	Carboxypeptidase G2	d__Bacteria;p__Proteobacteria;c__Gammaproteobacteria;o__Burkholderiales;f__Burkholderiaceae;g__Sutterella;s__	p__Proteobacteria	1.4e-37	126	378	1	[[1, 370]]	2.2e-37	GUT_GENOME210225	MAG	SRR6028491_bin.5	61.64	103170
GUT_GENOME206946_01669	Acetylornithine deacetylase	d__Bacteria;p__Actinobacteriota;c__Coriobacteriia;o__Coriobacteriales;f__Coriobacteriaceae;g__Collinsella;s__	p__Actinobacteriota	6.2e-11	38.1	320	1	[[9, 387]]	8.1e-11	GUT_GENOME206946	MAG	SRR5580128_bin.8	59.71	103107
GUT_GENOME207903_02496	Peptidase T	d__Bacteria;p__Firmicutes_A;c__Clostridia;o__Clostridiales;f__Clostridiaceae;g__Clostridium_J;s__	p__Firmicutes_A	4.9e-17	59.1	269	1	[[2, 366]]	6e-17	GUT_GENOME207903	MAG	SRR5963300_bin.9	28.18	103142
GUT_GENOME207903_00084	N-formyl-4-amino-5-aminomethyl-2-methylpyrimidine deformylase	d__Bacteria;p__Firmicutes_A;c__Clostridia;o__Clostridiales;f__Clostridiaceae;g__Clostridium_J;s__	p__Firmicutes_A	1e-09	35	286	1	[[1, 319]]	1.5e-09	GUT_GENOME207903	MAG	SRR5963300_bin.9	28.18	103142
GUT_GENOME024543_01737	Carboxypeptidase G2	d__Bacteria;p__Firmicutes_A;c__Clostridia;o__Oscillospirales;f__Oscillospiraceae;g__CAG-83;s__	p__Firmicutes_A	2e-49	165.3	382	1	[[2, 379]]	2.5e-49	GUT_GENOME024543	MAG	CosteaPI_2017__SID713B003-11-90-0__bin.21	59.85	100703	1.54968	0.0150883
GUT_GENOME027824_02016	Acetylornithine deacetylase	d__Bacteria;p__Firmicutes_A;c__Clostridia;o__Lachnospirales;f__Lachnospiraceae;g__Clostridium_M;s__	p__Firmicutes_A	8.5e-12	41.7	334	1	[[0, 364]]	1e-11	GUT_GENOME027824	MAG	DRR042365_bin.34	43.24	100774
GUT_GENOME030277_00589	putative hydrolase YxeP	d__Bacteria;p__Fusobacteriota;c__Fusobacteriia;o__Fusobacteriales;f__Fusobacteriaceae;g__Fusobacterium;s__Fusobacterium nucleatum_E	p__Fusobacteriota	1.1e-06	24.2	234	1	[[30, 320]]	1.4e-06	GUT_GENOME030277	MAG	ERR1018241_bin.50	27.54	100790
GUT_GENOME024810_00305	Acetylornithine deacetylase	d__Bacteria;p__Firmicutes_A;c__Clostridia;o__Oscillospirales;f__Oscillospiraceae;g__UBA738;s__	p__Firmicutes_A	6.7e-12	40.9	236	1	[[1, 261]]	1.4e-11	GUT_GENOME024810	MAG	CosteaPI_2017__SID713B014-11-0-0__bin.100	59.78	100709
GUT_GENOME026064_00904	putative succinyl-diaminopimelate desuccinylase	d__Bacteria;p__Actinobacteriota;c__Coriobacteriia;o__Coriobacteriales;f__Coriobacteriaceae;g__Collinsella;s__	p__Actinobacteriota	3.2e-12	42.2	329	1	[[8, 392]]	4.2e-12	GUT_GENOME026064	MAG	CosteaPI_2017__SID713B052-11-0-0__bin.25	60.03	100731
GUT_GENOME029599_01850	Carboxypeptidase G2	d__Bacteria;p__Firmicutes_C;c__Negativicutes;o__Veillonellales;f__Veillonellaceae;g__Veillonella_A;s__	p__Firmicutes_C	2.4e-43	145	374	1	[[1, 373]]	3.2e-43	GUT_GENOME029599	MAG	ERR1018210_bin.3	38.94	100783
GUT_GENOME029599_01343	Peptidase T	d__Bacteria;p__Firmicutes_C;c__Negativicutes;o__Veillonellales;f__Veillonellaceae;g__Veillonella_A;s__	p__Firmicutes_C	1.2e-20	70.2	252	1	[[17, 371]]	1.4e-20	GUT_GENOME029599	MAG	ERR1018210_bin.3	38.94	100783
GUT_GENOME029599_01464	Peptidase T	d__Bacteria;p__Firmicutes_C;c__Negativicutes;o__Veillonellales;f__Veillonellaceae;g__Veillonella_A;s__	p__Firmicutes_C	4e-17	58.5	250	1	[[23, 283]]	5.6e-17	GUT_GENOME029599	MAG	ERR1018210_bin.3	38.94	100783
GUT_GENOME033705_00442	putative succinyl-diaminopimelate desuccinylase	d__Bacteria;p__Actinobacteriota;c__Coriobacteriia;o__Coriobacteriales;f__Coriobacteriaceae;g__Collinsella;s__	p__Actinobacteriota	2.7e-10	36	299	1	[[9, 390]]	3.3e-10	GUT_GENOME033705	MAG	ERR1190649_bin.31	59.7	100811
GUT_GENOME032561_00658	putative succinyl-diaminopimelate desuccinylase	d__Bacteria;p__Actinobacteriota;c__Coriobacteriia;o__Coriobacteriales;f__Coriobacteriaceae;g__Collinsella;s__	p__Actinobacteriota	4.5e-12	41.9	321	1	[[8, 387]]	5.5e-12	GUT_GENOME032561	MAG	ERR1190584_bin.4	59.85	100802
GUT_GENOME041878_00446	Carboxypeptidase G2	d__Bacteria;p__Firmicutes_A;c__Clostridia;o__Christensenellales;f__CAG-138;g__CAG-1024;s__CAG-1024 sp000432015	p__Firmicutes_A	2e-23	79.2	384	1	[[9, 388]]	2.5e-23	GUT_GENOME041878	MAG	ERR1293928_bin.16	57.68	100875	0.273473	0.0257572
GUT_GENOME275465_01430	putative succinyl-diaminopimelate desuccinylase	d__Bacteria;p__Actinobacteriota;c__Coriobacteriia;o__Coriobacteriales;f__Coriobacteriaceae;g__Collinsella;s__	p__Actinobacteriota	1.6e-13	46.6	320	1	[[9, 389]]	2.1e-13	GUT_GENOME275465	MAG	ZeeviD_2015__PNP_Main_53__bin.32	60.21	104450
GUT_GENOME273451_00943	Acetylornithine deacetylase	d__Bacteria;p__Actinobacteriota;c__Coriobacteriia;o__Coriobacteriales;f__Coriobacteriaceae;g__Collinsella;s__	p__Actinobacteriota	2.4e-10	36.2	318	1	[[8, 385]]	3e-10	GUT_GENOME273451	MAG	ZeeviD_2015__PNP_Main_444__bin.10	60.4	104415
GUT_GENOME095471_00990	Succinyl-diaminopimelate desuccinylase	d__Bacteria;p__Actinobacteriota;c__Actinobacteria;o__Actinomycetales;f__Actinomycetaceae;g__Pauljensenia;s__	p__Actinobacteriota	7.3e-11	37.9	230	1	[[1, 241]]	1.3e-10	GUT_GENOME095471	MAG	FerrettiP_2018__CA_C10020IS2347FE_t4M15__bin.11	65.43	101273
GUT_GENOME024905_01679	putative hydrolase YxeP	d__Bacteria;p__Fusobacteriota;c__Fusobacteriia;o__Fusobacteriales;f__Fusobacteriaceae;g__Fusobacterium_B;s__	p__Fusobacteriota	8.6e-06	21.3	235	1	[[33, 318]]	1.8e-05	GUT_GENOME024905	MAG	CosteaPI_2017__SID713B015-11-90-0__bin.18	30.36	100712	0.0911577	0.0102801
GUT_GENOME027297_00007	Peptidase T	d__Bacteria;p__Firmicutes_C;c__Negativicutes;o__Veillonellales;f__Negativicoccaceae;g__Negativicoccus;s__Negativicoccus massiliensis	p__Firmicutes_C	2.8e-22	74.6	333	1	[[1, 350]]	3.4e-22	GUT_GENOME027297	MAG	DavidLA_2015__LD-Run1-06__bin.7	53.08	100757
GUT_GENOME031916_01888	putative succinyl-diaminopimelate desuccinylase	d__Bacteria;p__Actinobacteriota;c__Coriobacteriia;o__Coriobacteriales;f__Coriobacteriaceae;g__Collinsella;s__	p__Actinobacteriota	1e-10	37.5	320	1	[[8, 388]]	1.2e-10	GUT_GENOME031916	MAG	ERR1190549_bin.6	59.83	100798
GUT_GENOME037207_00468	putative succinyl-diaminopimelate desuccinylase	d__Bacteria;p__Firmicutes;c__Bacilli;o__Lactobacillales;f__Lactobacillaceae;g__Lactobacillus_C;s__	p__Firmicutes	1.2e-15	54	240	1	[[3, 338]]	1.9e-15	GUT_GENOME037207	MAG	ERR1190924_bin.18	53.36	100843
GUT_GENOME037519_00191	Carboxypeptidase G2	d__Bacteria;p__Proteobacteria;c__Gammaproteobacteria;o__Burkholderiales;f__Burkholderiaceae;g__CAG-521;s__	p__Proteobacteria	4e-51	170.4	379	1	[[1, 371]]	5.6e-51	GUT_GENOME037519	MAG	ERR1190934_bin.74	45.74	100850
GUT_GENOME035389_00130	putative succinyl-diaminopimelate desuccinylase	d__Bacteria;p__Actinobacteriota;c__Coriobacteriia;o__Coriobacteriales;f__Coriobacteriaceae;g__Collinsella;s__Collinsella sp002232035	p__Actinobacteriota	5e-11	38.5	319	1	[[8, 390]]	6.2e-11	GUT_GENOME035389	MAG	ERR1190842_bin.26	59.93	100827
GUT_GENOME000944_03287	N-acetyl-lysine deacetylase	d__Bacteria;p__Bacteroidota;c__Bacteroidia;o__Bacteroidales;f__Tannerellaceae;g__Parabacteroides;s__	p__Bacteroidota	2.3e-09	34.4	233	1	[[22, 304]]	2.9e-09	GUT_GENOME000944	Isolate	AF18-52	43.02	100174	0.0911577	0.0132276
GUT_GENOME000612_01632	Succinyl-diaminopimelate desuccinylase	d__Bacteria;p__Firmicutes_A;c__Clostridia;o__Oscillospirales;f__Ruminococcaceae;g__Anaerotruncus;s__Anaerotruncus rubiinfantis	p__Firmicutes_A	4.5e-23	78.9	297	1	[[4, 305]]	5.7e-23	GUT_GENOME000612	Isolate	20298_3_69	55.4	100131
GUT_GENOME000612_00881	Acetylornithine deacetylase	d__Bacteria;p__Firmicutes_A;c__Clostridia;o__Oscillospirales;f__Ruminococcaceae;g__Anaerotruncus;s__Anaerotruncus rubiinfantis	p__Firmicutes_A	4.9e-19	65.6	294	1	[[36, 389]]	6.1e-19	GUT_GENOME000612	Isolate	20298_3_69	55.4	100131
GUT_GENOME000612_01368	putative succinyl-diaminopimelate desuccinylase	d__Bacteria;p__Firmicutes_A;c__Clostridia;o__Oscillospirales;f__Ruminococcaceae;g__Anaerotruncus;s__Anaerotruncus rubiinfantis	p__Firmicutes_A	1.7e-18	63.9	332	1	[[3, 385]]	2.1e-18	GUT_GENOME000612	Isolate	20298_3_69	55.4	100131
GUT_GENOME000612_01467	N-formyl-4-amino-5-aminomethyl-2-methylpyrimidine deformylase	d__Bacteria;p__Firmicutes_A;c__Clostridia;o__Oscillospirales;f__Ruminococcaceae;g__Anaerotruncus;s__Anaerotruncus rubiinfantis	p__Firmicutes_A	2.1e-12	43.7	272	2	[[0, 226], [252, 352]]	4.1e-10	GUT_GENOME000612	Isolate	20298_3_69	55.4	100131
GUT_GENOME000612_01734	putative succinyl-diaminopimelate desuccinylase	d__Bacteria;p__Firmicutes_A;c__Clostridia;o__Oscillospirales;f__Ruminococcaceae;g__Anaerotruncus;s__Anaerotruncus rubiinfantis	p__Firmicutes_A	2.2e-09	33.8	241	1	[[49, 374]]	2.7e-09	GUT_GENOME000612	Isolate	20298_3_69	55.4	100131
GUT_GENOME000629_00225	putative hydrolase YxeP	d__Bacteria;p__Firmicutes_A;c__Clostridia;o__Lachnospirales;f__Lachnospiraceae;g__Agathobacter;s__Agathobacter sp000434275	p__Firmicutes_A	6.4e-11	39.1	260	1	[[30, 310]]	1.4e-10	GUT_GENOME000629	Isolate	20427_4_25	41.16	100136	1.91431	0.00867564
GUT_GENOME245427_01399	Carboxypeptidase G2	d__Bacteria;p__Proteobacteria;c__Gammaproteobacteria;o__Burkholderiales;f__Burkholderiaceae;g__CAG-521;s__	p__Proteobacteria	1.6e-49	165.1	379	1	[[1, 371]]	2.2e-49	GUT_GENOME245427	MAG	VogtmannE_2016__MMRS43563715ST-27-0-0__bin.27	48.03	103836
GUT_GENOME245427_01437	N-formyl-4-amino-5-aminomethyl-2-methylpyrimidine deformylase	d__Bacteria;p__Proteobacteria;c__Gammaproteobacteria;o__Burkholderiales;f__Burkholderiaceae;g__CAG-521;s__	p__Proteobacteria	3.5e-06	22.2	256	1	[[46, 356]]	4.9e-06	GUT_GENOME245427	MAG	VogtmannE_2016__MMRS43563715ST-27-0-0__bin.27	48.03	103836
GUT_GENOME245427_01465	Peptidase T	d__Bacteria;p__Proteobacteria;c__Gammaproteobacteria;o__Burkholderiales;f__Burkholderiaceae;g__CAG-521;s__	p__Proteobacteria	5.3e-06	21.6	255	2	[[31, 87], [148, 401]]	1.8e-05	GUT_GENOME245427	MAG	VogtmannE_2016__MMRS43563715ST-27-0-0__bin.27	48.03	103836
GUT_GENOME246915_01831	Carboxypeptidase G2	d__Bacteria;p__Proteobacteria;c__Gammaproteobacteria;o__Burkholderiales;f__Burkholderiaceae;g__Duodenibacillus;s__	p__Proteobacteria	1.2e-43	146.1	380	1	[[7, 406]]	1.5e-43	GUT_GENOME246915	MAG	VogtmannE_2016__MMRS84085284ST-27-0-0__bin.24	64.15	103879
GUT_GENOME246915_00404	Carboxypeptidase G2	d__Bacteria;p__Proteobacteria;c__Gammaproteobacteria;o__Burkholderiales;f__Burkholderiaceae;g__Duodenibacillus;s__	p__Proteobacteria	2.8e-40	134.9	377	1	[[1, 370]]	3.4e-40	GUT_GENOME246915	MAG	VogtmannE_2016__MMRS84085284ST-27-0-0__bin.24	64.15	103879
GUT_GENOME246915_00676	N-acetyl-lysine deacetylase	d__Bacteria;p__Proteobacteria;c__Gammaproteobacteria;o__Burkholderiales;f__Burkholderiaceae;g__Duodenibacillus;s__	p__Proteobacteria	3.2e-13	45.7	277	1	[[28, 368]]	4.2e-13	GUT_GENOME246915	MAG	VogtmannE_2016__MMRS84085284ST-27-0-0__bin.24	64.15	103879
GUT_GENOME246554_01683	putative succinyl-diaminopimelate desuccinylase	d__Bacteria;p__Actinobacteriota;c__Coriobacteriia;o__Coriobacteriales;f__Coriobacteriaceae;g__Collinsella;s__	p__Actinobacteriota	5.8e-10	34.9	256	1	[[11, 387]]	6.6e-10	GUT_GENOME246554	MAG	VogtmannE_2016__MMRS72980899ST-27-0-0__bin.15	59.98	103873
GUT_GENOME246008_00536	Carboxypeptidase G2	d__Bacteria;p__Proteobacteria;c__Gammaproteobacteria;o__Burkholderiales;f__Burkholderiaceae;g__Sutterella;s__	p__Proteobacteria	4.4e-39	130.8	375	1	[[3, 370]]	6.1e-39	GUT_GENOME246008	MAG	VogtmannE_2016__MMRS62192467ST-27-0-0__bin.13	49.78	103852	0.0911577	0.00720947
GUT_GENOME207226_00589	Succinyl-diaminopimelate desuccinylase	d__Bacteria;p__Actinobacteriota;c__Actinobacteria;o__Actinomycetales;f__Actinomycetaceae;g__Pauljensenia;s__Pauljensenia sp001838165	p__Actinobacteriota	1.4e-10	37.1	230	1	[[1, 241]]	2.1e-10	GUT_GENOME207226	MAG	SRR5963000_bin.2	65.73	103113
GUT_GENOME210710_00129	Acetylornithine deacetylase	d__Bacteria;p__Bacteroidota;c__Bacteroidia;o__Bacteroidales;f__Muribaculaceae;g__K10;s__	p__Bacteroidota	4.7e-09	31.9	245	1	[[9, 297]]	6.6e-09	GUT_GENOME210710	MAG	SRR6028572_bin.16	52.51	103177
GUT_GENOME031710_00589	putative succinyl-diaminopimelate desuccinylase	d__Bacteria;p__Actinobacteriota;c__Coriobacteriia;o__Coriobacteriales;f__Coriobacteriaceae;g__Collinsella;s__	p__Actinobacteriota	1.8e-09	33.2	262	1	[[14, 345]]	2.3e-09	GUT_GENOME031710	MAG	ERR1190537_bin.20	60.2	100795
GUT_GENOME027533_00265	putative succinyl-diaminopimelate desuccinylase	d__Bacteria;p__Actinobacteriota;c__Coriobacteriia;o__Coriobacteriales;f__Coriobacteriaceae;g__Collinsella;s__	p__Actinobacteriota	7.6e-12	41.2	320	1	[[8, 388]]	9.3e-12	GUT_GENOME027533	MAG	DRR042316_bin.21	59.96	100768
GUT_GENOME227599_02742	putative hydrolase YxeP	d__Bacteria;p__Firmicutes_A;c__Clostridia;o__Lachnospirales;f__Lachnospiraceae;g__Blautia;s__Blautia sp900120295	p__Firmicutes_A	3.9e-06	22.9	281	1	[[22, 322]]	6.1e-06	GUT_GENOME227599	MAG	SRS290676_11	37.94	103340
GUT_GENOME225144_01593	putative succinyl-diaminopimelate desuccinylase	d__Bacteria;p__Firmicutes_A;c__Clostridia;o__Lachnospirales;f__Lachnospiraceae;g__Faecalicatena;s__	p__Firmicutes_A	7.9e-14	48	321	1	[[22, 381]]	1e-13	GUT_GENOME225144	MAG	SRS1735585_2	41.42	103316
GUT_GENOME225144_01592	Succinyl-diaminopimelate desuccinylase	d__Bacteria;p__Firmicutes_A;c__Clostridia;o__Lachnospirales;f__Lachnospiraceae;g__Faecalicatena;s__	p__Firmicutes_A	1.9e-06	23.7	243	1	[[13, 316]]	2.5e-06	GUT_GENOME225144	MAG	SRS1735585_2	41.42	103316
GUT_GENOME231250_02838	Peptidase T	d__Bacteria;p__Firmicutes_I;c__Bacilli_A;o__Paenibacillales;f__Paenibacillaceae;g__Paenibacillus_A;s__	p__Firmicutes_I	2.9e-19	67	272	1	[[2, 322]]	3.4e-19	GUT_GENOME231250	MAG	SRS311478_6	54.29	103359
GUT_GENOME277515_00270	Carboxypeptidase G2	d__Bacteria;p__Elusimicrobiota;c__Elusimicrobia;o__Elusimicrobiales;f__Elusimicrobiaceae;g__;s__	p__Elusimicrobiota	4.2e-22	74.5	276	1	[[0, 362]]	4.7e-22	GUT_GENOME277515	MAG	ZeeviD_2015__PNP_Main_657__bin.2	50.02	104492	0.0911577	0.0302109
GUT_GENOME277515_00618	Succinyl-diaminopimelate desuccinylase	d__Bacteria;p__Elusimicrobiota;c__Elusimicrobia;o__Elusimicrobiales;f__Elusimicrobiaceae;g__;s__	p__Elusimicrobiota	2e-17	59	329	1	[[3, 380]]	2.7e-17	GUT_GENOME277515	MAG	ZeeviD_2015__PNP_Main_657__bin.2	50.02	104492	0.0911577	0.0302109
GUT_GENOME274466_00220	Carboxypeptidase G2	d__Bacteria;p__Desulfobacterota_A;c__Desulfovibrionia;o__Desulfovibrionales;f__Desulfovibrionaceae;g__Bilophila;s__	p__Desulfobacterota_A	2.2e-43	145.7	377	1	[[2, 397]]	2.8e-43	GUT_GENOME274466	MAG	ZeeviD_2015__PNP_Main_488__bin.46	59.09	104433	0.273473	0.00639714
GUT_GENOME274466_00223	Carboxypeptidase G2	d__Bacteria;p__Desulfobacterota_A;c__Desulfovibrionia;o__Desulfovibrionales;f__Desulfovibrionaceae;g__Bilophila;s__	p__Desulfobacterota_A	1.9e-41	139.2	378	1	[[12, 401]]	2.5e-41	GUT_GENOME274466	MAG	ZeeviD_2015__PNP_Main_488__bin.46	59.09	104433	0.273473	0.00639714
GUT_GENOME000559_04967	Acetylornithine deacetylase	d__Bacteria;p__Proteobacteria;c__Gammaproteobacteria;o__Enterobacterales;f__Enterobacteriaceae;g__Klebsiella_A;s__Klebsiella_A oxytoca	p__Proteobacteria	3.6e-15	53.7	232	1	[[0, 275]]	4.3e-15	GUT_GENOME000559	Isolate	20298_3_13	55.23	100107	0.0911577	0.0129143
GUT_GENOME001105_00389	putative succinyl-diaminopimelate desuccinylase	d__Bacteria;p__Firmicutes_A;c__Clostridia;o__Lachnospirales;f__Lachnospiraceae;g__UBA9502;s__	p__Firmicutes_A	3.2e-21	72.9	310	1	[[9, 373]]	4e-21	GUT_GENOME001105	Isolate	AF27-2AA	48.42	100194	0.546946	0.00933742
GUT_GENOME000727_01550	N-formyl-4-amino-5-aminomethyl-2-methylpyrimidine deformylase	d__Bacteria;p__Firmicutes_A;c__Clostridia;o__Clostridiales;f__Clostridiaceae;g__Clostridium;s__Clostridium paraputrificum	p__Firmicutes_A	2.7e-09	33.6	239	1	[[17, 291]]	3.5e-09	GUT_GENOME000727	Isolate	8080_1_81	29.7	100151
GUT_GENOME232302_01396	Succinyl-diaminopimelate desuccinylase	d__Bacteria;p__Proteobacteria;c__Gammaproteobacteria;o__Xanthomonadales;f__Xanthomonadaceae;g__Stenotrophomonas;s__Stenotrophomonas maltophilia_AM	p__Proteobacteria	1.3e-08	31.7	288	1	[[1, 369]]	1.7e-08	GUT_GENOME232302	MAG	SRS414225_5	66.12	103403
GUT_GENOME232404_00124	putative hydrolase YxeP	d__Bacteria;p__Firmicutes_A;c__Clostridia;o__Oscillospirales;f__Oscillospiraceae;g__CAG-110;s__	p__Firmicutes_A	3.2e-07	26.3	258	1	[[26, 312]]	4.7e-07	GUT_GENOME232404	MAG	SRS475534_81	56.53	103409	0.273473	0.0189108
GUT_GENOME236224_01505	putative hydrolase YxeP	d__Bacteria;p__Firmicutes_A;c__Clostridia;o__Christensenellales;f__CAG-74;g__UBA11524;s__	p__Firmicutes_A	6.1e-10	35.2	271	1	[[36, 320]]	1.1e-09	GUT_GENOME236224	MAG	SRS476152_11	64.88	103490
GUT_GENOME194081_00365	N-acetyldiaminopimelate deacetylase	d__Bacteria;p__Firmicutes;c__Bacilli;o__Lactobacillales;f__Aerococcaceae;g__Granulicatella;s__	p__Firmicutes	7e-08	27.6	292	1	[[31, 358]]	9.4e-08	GUT_GENOME194081	MAG	SRR5057083_bin.47	39.13	103010
GUT_GENOME196193_00348	Acetylornithine deacetylase	d__Bacteria;p__Actinobacteriota;c__Coriobacteriia;o__Coriobacteriales;f__Coriobacteriaceae;g__Collinsella;s__	p__Actinobacteriota	3e-11	39	319	1	[[8, 385]]	3.6e-11	GUT_GENOME196193	MAG	SRR5127449_bin.10	60.16	103031
GUT_GENOME200873_01061	Acetylornithine deacetylase	d__Bacteria;p__Firmicutes_A;c__Clostridia;o__Lachnospirales;f__Lachnospiraceae;g__Clostridium_Q;s__Clostridium_Q sp000435655	p__Firmicutes_A	7.6e-13	44.7	238	1	[[0, 318]]	9.5e-13	GUT_GENOME200873	MAG	SRR5279309_bin.20	50.01	103074	0.0911577	0.00670519
GUT_GENOME200873_01064	putative succinyl-diaminopimelate desuccinylase	d__Bacteria;p__Firmicutes_A;c__Clostridia;o__Lachnospirales;f__Lachnospiraceae;g__Clostridium_Q;s__Clostridium_Q sp000435655	p__Firmicutes_A	1e-08	31.1	277	1	[[30, 345]]	1.3e-08	GUT_GENOME200873	MAG	SRR5279309_bin.20	50.01	103074	0.0911577	0.00670519
GUT_GENOME094102_00264	putative succinyl-diaminopimelate desuccinylase	d__Bacteria;p__Actinobacteriota;c__Coriobacteriia;o__Coriobacteriales;f__Coriobacteriaceae;g__Collinsella;s__	p__Actinobacteriota	3.2e-11	38.9	306	1	[[9, 386]]	4.1e-11	GUT_GENOME094102	MAG	FengQ_2015__SID530451__bin.55	60.39	101241
GUT_GENOME244968_01170	Succinyl-diaminopimelate desuccinylase	d__Bacteria;p__Bacteroidota;c__Bacteroidia;o__Bacteroidales;f__Muribaculaceae;g__CAG-485;s__	p__Bacteroidota	1.1e-12	44.4	240	1	[[60, 327]]	1.6e-12	GUT_GENOME244968	MAG	VogtmannE_2016__MMRS32573774ST-27-0-0__bin.69	45.94	103831
GUT_GENOME245868_01699	putative succinyl-diaminopimelate desuccinylase	d__Bacteria;p__Actinobacteriota;c__Coriobacteriia;o__Coriobacteriales;f__Coriobacteriaceae;g__Collinsella;s__	p__Actinobacteriota	9.2e-09	30.9	255	1	[[55, 389]]	1.2e-08	GUT_GENOME245868	MAG	VogtmannE_2016__MMRS56137463ST-27-0-0__bin.21	60.03	103848
GUT_GENOME246479_01569	putative succinyl-diaminopimelate desuccinylase	d__Bacteria;p__Actinobacteriota;c__Coriobacteriia;o__Coriobacteriales;f__Coriobacteriaceae;g__Collinsella;s__	p__Actinobacteriota	1.9e-12	43	322	1	[[8, 391]]	2.3e-12	GUT_GENOME246479	MAG	VogtmannE_2016__MMRS71238091ST-27-0-0__bin.9	60.11	103870
GUT_GENOME246802_00436	putative succinyl-diaminopimelate desuccinylase	d__Bacteria;p__Firmicutes_A;c__Clostridia;o__Oscillospirales;f__Ruminococcaceae;g__Anaerotruncus;s__	p__Firmicutes_A	4.4e-20	68.7	249	1	[[35, 324]]	6.3e-20	GUT_GENOME246802	MAG	VogtmannE_2016__MMRS80093644ST-27-0-0__bin.55	63.2	103876
GUT_GENOME244252_00059	putative hydrolase YxeP	d__Bacteria;p__Firmicutes_A;c__Clostridia;o__Saccharofermentanales;f__DTU023;g__;s__	p__Firmicutes_A	1.7e-06	23.3	242	1	[[36, 315]]	3.2e-06	GUT_GENOME244252	MAG	VincentC_2016__MM096__bin.5	51.11	103801
GUT_GENOME246407_01581	putative succinyl-diaminopimelate desuccinylase	d__Bacteria;p__Actinobacteriota;c__Coriobacteriia;o__Coriobacteriales;f__Coriobacteriaceae;g__Collinsella;s__	p__Actinobacteriota	2e-10	36.4	312	1	[[9, 392]]	2.6e-10	GUT_GENOME246407	MAG	VogtmannE_2016__MMRS68630931ST-27-0-0__bin.23	60.27	103865
GUT_GENOME194902_01931	Carboxypeptidase G2	d__Bacteria;p__Proteobacteria;c__Gammaproteobacteria;o__Burkholderiales;f__Burkholderiaceae;g__Duodenibacillus;s__	p__Proteobacteria	3.5e-42	141.2	391	1	[[1, 395]]	4.6e-42	GUT_GENOME194902	MAG	SRR5091553_bin.25	54.66	103017	1.45852	0.00947147
GUT_GENOME194902_01845	Carboxypeptidase G2	d__Bacteria;p__Proteobacteria;c__Gammaproteobacteria;o__Burkholderiales;f__Burkholderiaceae;g__Duodenibacillus;s__	p__Proteobacteria	3.3e-41	138	377	1	[[1, 370]]	3.9e-41	GUT_GENOME194902	MAG	SRR5091553_bin.25	54.66	103017	1.45852	0.00947147
GUT_GENOME194902_00223	Succinyl-diaminopimelate desuccinylase	d__Bacteria;p__Proteobacteria;c__Gammaproteobacteria;o__Burkholderiales;f__Burkholderiaceae;g__Duodenibacillus;s__	p__Proteobacteria	4.3e-06	22.3	270	1	[[24, 368]]	6e-06	GUT_GENOME194902	MAG	SRR5091553_bin.25	54.66	103017	1.45852	0.00947147
GUT_GENOME197867_01814	Acetylornithine deacetylase	d__Bacteria;p__Actinobacteriota;c__Coriobacteriia;o__Coriobacteriales;f__Coriobacteriaceae;g__Collinsella;s__	p__Actinobacteriota	1.3e-09	33.8	321	1	[[8, 392]]	1.5e-09	GUT_GENOME197867	MAG	SRR5127766_bin.2	59.83	103052
GUT_GENOME195667_01681	Succinyl-diaminopimelate desuccinylase	d__Bacteria;p__Proteobacteria;c__Gammaproteobacteria;o__Burkholderiales;f__Burkholderiaceae;g__Parasutterella;s__Parasutterella sp000980495	p__Proteobacteria	6.2e-21	71.3	294	1	[[1, 299]]	7.6e-21	GUT_GENOME195667	MAG	SRR5106488_bin.11	49.3	103022	4.7402	0.0093299
GUT_GENOME195667_01163	N-acetyl-lysine deacetylase	d__Bacteria;p__Proteobacteria;c__Gammaproteobacteria;o__Burkholderiales;f__Burkholderiaceae;g__Parasutterella;s__Parasutterella sp000980495	p__Proteobacteria	5.5e-16	55	275	1	[[58, 365]]	8.2e-16	GUT_GENOME195667	MAG	SRR5106488_bin.11	49.3	103022	4.7402	0.0093299
GUT_GENOME195667_00091	N-acetyl-lysine deacetylase	d__Bacteria;p__Proteobacteria;c__Gammaproteobacteria;o__Burkholderiales;f__Burkholderiaceae;g__Parasutterella;s__Parasutterella sp000980495	p__Proteobacteria	3.3e-09	32.6	337	1	[[51, 410]]	4.8e-09	GUT_GENOME195667	MAG	SRR5106488_bin.11	49.3	103022	4.7402	0.0093299
GUT_GENOME202528_01721	Acetylornithine deacetylase	d__Bacteria;p__Actinobacteriota;c__Coriobacteriia;o__Coriobacteriales;f__Coriobacteriaceae;g__Collinsella;s__	p__Actinobacteriota	1.9e-10	36.5	320	1	[[8, 388]]	2.3e-10	GUT_GENOME202528	MAG	SRR5558158_bin.11	60.07	103083
GUT_GENOME000030_01248	putative succinyl-diaminopimelate desuccinylase	d__Bacteria;p__Firmicutes;c__Bacilli;o__Staphylococcales;f__Staphylococcaceae;g__Staphylococcus;s__Staphylococcus xylosus_B	p__Firmicutes	1.2e-14	50.9	244	1	[[10, 367]]	1.5e-14	GUT_GENOME000030	Isolate	12718_7_23	32.39	100011
GUT_GENOME000396_01763	putative succinyl-diaminopimelate desuccinylase	d__Bacteria;p__Actinobacteriota;c__Coriobacteriia;o__Coriobacteriales;f__Coriobacteriaceae;g__Collinsella;s__Collinsella aerofaciens_F	p__Actinobacteriota	1.2e-09	33.9	265	1	[[10, 388]]	1.4e-09	GUT_GENOME000396	Isolate	18048_2_57	59.94	100085
GUT_GENOME000243_01287	putative succinyl-diaminopimelate desuccinylase	d__Bacteria;p__Actinobacteriota;c__Coriobacteriia;o__Coriobacteriales;f__Coriobacteriaceae;g__Collinsella;s__Collinsella aerofaciens_E	p__Actinobacteriota	5.6e-11	38.3	329	1	[[8, 394]]	7.1e-11	GUT_GENOME000243	Isolate	14207_7_25	60.12	100061
GUT_GENOME119616_01391	putative succinyl-diaminopimelate desuccinylase	d__Bacteria;p__Actinobacteriota;c__Coriobacteriia;o__Coriobacteriales;f__Coriobacteriaceae;g__Collinsella;s__Collinsella aerofaciens_F	p__Actinobacteriota	8e-12	41	307	1	[[9, 388]]	1e-11	GUT_GENOME119616	MAG	LiJ_2014__O2.UC6-1__bin.37	59.76	101986
GUT_GENOME117767_03032	Carboxypeptidase G2	d__Bacteria;p__Firmicutes_A;c__Clostridia;o__Lachnospirales;f__Lachnospiraceae;g__Clostridium_M;s__	p__Firmicutes_A	1.2e-39	133.6	312	1	[[8, 391]]	1.3e-39	GUT_GENOME117767	MAG	LiJ_2014__MH0389__bin.74	50.4	101971
GUT_GENOME117767_00429	N-formyl-4-amino-5-aminomethyl-2-methylpyrimidine deformylase	d__Bacteria;p__Firmicutes_A;c__Clostridia;o__Lachnospirales;f__Lachnospiraceae;g__Clostridium_M;s__	p__Firmicutes_A	2.8e-13	46.6	261	1	[[23, 307]]	3.9e-13	GUT_GENOME117767	MAG	LiJ_2014__MH0389__bin.74	50.4	101971
GUT_GENOME244583_00936	N-acetyl-lysine deacetylase	d__Bacteria;p__Firmicutes_A;c__Clostridia;o__Oscillospirales;f__Oscillospiraceae;g__;s__	p__Firmicutes_A	4.6e-09	32.2	322	1	[[48, 387]]	6.4e-09	GUT_GENOME244583	MAG	VogtmannE_2016__MMRS15137911ST-27-0-0__bin.33	60.83	103819
GUT_GENOME246361_00522	putative succinyl-diaminopimelate desuccinylase	d__Bacteria;p__Actinobacteriota;c__Coriobacteriia;o__Coriobacteriales;f__Coriobacteriaceae;g__Collinsella;s__Collinsella aerofaciens_F	p__Actinobacteriota	8.8e-12	40.8	320	1	[[9, 386]]	1.1e-11	GUT_GENOME246361	MAG	VogtmannE_2016__MMRS67690541ST-27-0-0__bin.27	60.29	103864
GUT_GENOME247103_01805	Succinyl-diaminopimelate desuccinylase	d__Bacteria;p__Firmicutes_A;c__Clostridia;o__Oscillospirales;f__Oscillospiraceae;g__CAG-110;s__	p__Firmicutes_A	1e-29	100.2	393	1	[[2, 392]]	1.4e-29	GUT_GENOME247103	MAG	VogtmannE_2016__MMRS86168210ST-27-0-0__bin.55	57.41	103884
GUT_GENOME247103_01897	Carboxypeptidase G2	d__Bacteria;p__Firmicutes_A;c__Clostridia;o__Oscillospirales;f__Oscillospiraceae;g__CAG-110;s__	p__Firmicutes_A	1.2e-29	100	316	1	[[4, 320]]	2e-29	GUT_GENOME247103	MAG	VogtmannE_2016__MMRS86168210ST-27-0-0__bin.55	57.41	103884
GUT_GENOME247103_01442	Succinyl-diaminopimelate desuccinylase	d__Bacteria;p__Firmicutes_A;c__Clostridia;o__Oscillospirales;f__Oscillospiraceae;g__CAG-110;s__	p__Firmicutes_A	2.7e-29	98.8	405	1	[[0, 403]]	3.9e-29	GUT_GENOME247103	MAG	VogtmannE_2016__MMRS86168210ST-27-0-0__bin.55	57.41	103884
GUT_GENOME247103_00837	Succinyl-diaminopimelate desuccinylase	d__Bacteria;p__Firmicutes_A;c__Clostridia;o__Oscillospirales;f__Oscillospiraceae;g__CAG-110;s__	p__Firmicutes_A	4.9e-12	41.9	248	2	[[1, 218], [295, 382]]	2.3e-09	GUT_GENOME247103	MAG	VogtmannE_2016__MMRS86168210ST-27-0-0__bin.55	57.41	103884
GUT_GENOME234055_00836	Carboxypeptidase G2	d__Bacteria;p__Proteobacteria;c__Gammaproteobacteria;o__Burkholderiales;f__Burkholderiaceae;g__Dakarella;s__	p__Proteobacteria	5.1e-40	133.5	365	1	[[3, 368]]	6.5e-40	GUT_GENOME234055	MAG	SRS475931_5	63.4	103441
GUT_GENOME038356_00592	putative succinyl-diaminopimelate desuccinylase	d__Bacteria;p__Actinobacteriota;c__Coriobacteriia;o__Coriobacteriales;f__Coriobacteriaceae;g__Collinsella;s__	p__Actinobacteriota	3.6e-10	35.7	302	1	[[9, 393]]	4.4e-10	GUT_GENOME038356	MAG	ERR1190974_bin.78	59.9	100862
GUT_GENOME044018_01689	Peptidase T	d__Bacteria;p__Firmicutes_A;c__Clostridia;o__Lachnospirales;f__Lachnospiraceae;g__UBA2882;s__	p__Firmicutes_A	3.1e-21	72.7	251	1	[[43, 321]]	4.2e-21	GUT_GENOME044018	MAG	ERR1305894_bin.87	46.42	100886	0.0911577	0.0114565
GUT_GENOME040261_00902	putative succinyl-diaminopimelate desuccinylase	d__Bacteria;p__Actinobacteriota;c__Coriobacteriia;o__Coriobacteriales;f__Coriobacteriaceae;g__Collinsella;s__	p__Actinobacteriota	1e-10	37.3	254	1	[[11, 385]]	1.2e-10	GUT_GENOME040261	MAG	ERR1293740_bin.13	60.03	100868
GUT_GENOME043611_00463	putative succinyl-diaminopimelate desuccinylase	d__Bacteria;p__Actinobacteriota;c__Coriobacteriia;o__Coriobacteriales;f__Coriobacteriaceae;g__Collinsella;s__	p__Actinobacteriota	2.4e-11	39.1	320	1	[[8, 386]]	3e-11	GUT_GENOME043611	MAG	ERR1305880_bin.2	60.66	100882
	1	10.0273	0.0141916
GUT_GENOME075103_00589	Carboxypeptidase G2	d__Bacteria;p__Firmicutes_C;c__Negativicutes;o__Veillonellales;f__Dialisteraceae;g__Dialister;s__Dialister sp900343095	p__Firmicutes_C	6.2e-45	150.3	377	1	[[4, 386]]	7.8e-45	GUT_GENOME075103	MAG	ERS396526_24	48.73	101060	10.0273	0.0141916
GUT_GENOME075103_01173	Carboxypeptidase G2	d__Bacteria;p__Firmicutes_C;c__Negativicutes;o__Veillonellales;f__Dialisteraceae;g__Dialister;s__Dialister sp900343095	p__Firmicutes_C	2.1e-41	138.6	396	1	[[1, 382]]	3.1e-41	GUT_GENOME075103	MAG	ERS396526_24	48.73	101060	10.0273	0.0141916
GUT_GENOME075103_00711	Peptidase T	d__Bacteria;p__Firmicutes_C;c__Negativicutes;o__Veillonellales;f__Dialisteraceae;g__Dialister;s__Dialister sp900343095	p__Firmicutes_C	5.4e-22	74.6	278	1	[[2, 298]]	7.2e-22	GUT_GENOME075103	MAG	ERS396526_24	48.73	101060	10.0273	0.0141916
GUT_GENOME066135_01180	putative succinyl-diaminopimelate desuccinylase	d__Bacteria;p__Firmicutes;c__Bacilli;o__Lactobacillales;f__Streptococcaceae;g__Lactococcus;s__Lactococcus garvieae_B	p__Firmicutes	4.9e-18	61.4	320	1	[[10, 366]]	5.9e-18	GUT_GENOME066135	MAG	ERR973090_bin.1	38.7	101017
GUT_GENOME096055_01403	Succinyl-diaminopimelate desuccinylase	d__Bacteria;p__Firmicutes;c__Bacilli;o__Lactobacillales;f__Lactobacillaceae;g__Lactobacillus_B;s__Lactobacillus_B ruminis	p__Firmicutes	1.9e-09	33.3	264	2	[[0, 176], [295, 429]]	0.00012	GUT_GENOME096055	Isolate	GCF_000159375	43.74	101334	1.00273	0.0122444
GUT_GENOME128217_01096	putative succinyl-diaminopimelate desuccinylase	d__Bacteria;p__Actinobacteriota;c__Coriobacteriia;o__Coriobacteriales;f__Atopobiaceae;g__Olsenella_E;s__Olsenella_E sp003150175	p__Actinobacteriota	1.5e-12	43.4	262	1	[[14, 355]]	1.8e-12	GUT_GENOME128217	MAG	LiuW_2016__SRR3993002__bin.87	66.04	102104
GUT_GENOME128217_00062	putative hydrolase YxeP	d__Bacteria;p__Actinobacteriota;c__Coriobacteriia;o__Coriobacteriales;f__Atopobiaceae;g__Olsenella_E;s__Olsenella_E sp003150175	p__Actinobacteriota	2.4e-09	32.8	235	1	[[32, 303]]	3.6e-09	GUT_GENOME128217	MAG	LiuW_2016__SRR3993002__bin.87	66.04	102104
GUT_GENOME128217_00370	N-acetyl-lysine deacetylase	d__Bacteria;p__Actinobacteriota;c__Coriobacteriia;o__Coriobacteriales;f__Atopobiaceae;g__Olsenella_E;s__Olsenella_E sp003150175	p__Actinobacteriota	5.5e-09	31.6	313	1	[[38, 384]]	7.3e-09	GUT_GENOME128217	MAG	LiuW_2016__SRR3993002__bin.87	66.04	102104
GUT_GENOME137460_00842	Peptidase T	d__Bacteria;p__Firmicutes_A;c__Clostridia;o__Tissierellales;f__Helcococcaceae;g__Parvimonas;s__Parvimonas sp001553085	p__Firmicutes_A	7.2e-18	60.5	367	1	[[0, 372]]	8.8e-18	GUT_GENOME137460	MAG	NielsenHB_2014__V1_UC17_2__bin.27	28.42	102197
GUT_GENOME104146_01435	putative succinyl-diaminopimelate desuccinylase	d__Bacteria;p__Actinobacteriota;c__Coriobacteriia;o__Coriobacteriales;f__Coriobacteriaceae;g__Collinsella;s__	p__Actinobacteriota	1.1e-10	37.2	261	1	[[11, 358]]	1.3e-10	GUT_GENOME104146	MAG	KarlssonFH_2013__S186__bin.9	60.14	101718
GUT_GENOME255264_00222	putative succinyl-diaminopimelate desuccinylase	d__Bacteria;p__Actinobacteriota;c__Coriobacteriia;o__Coriobacteriales;f__Coriobacteriaceae;g__Collinsella;s__	p__Actinobacteriota	1e-10	37.4	342	1	[[9, 394]]	1.3e-10	GUT_GENOME255264	MAG	XieH_2016__YSZC12003_36474__bin.45	60.14	104060
GUT_GENOME253443_01368	Carboxypeptidase G2	d__Bacteria;p__Firmicutes_A;c__Clostridia;o__Christensenellales;f__QALW01;g__;s__	p__Firmicutes_A	4.6e-25	84.7	316	1	[[23, 382]]	5.8e-25	GUT_GENOME253443	MAG	XieH_2016__YSZC12003_35989__bin.35	45.52	104010	0.273473	0.0123455
GUT_GENOME277044_00603	Carboxypeptidase G2	d__Bacteria;p__Firmicutes_A;c__Clostridia;o__Peptostreptococcales;f__Anaerovoracaceae;g__UBA1191;s__	p__Firmicutes_A	1.4e-44	149	324	1	[[2, 379]]	1.6e-44	GUT_GENOME277044	MAG	ZeeviD_2015__PNP_Main_62__bin.36	38.54	104481
GUT_GENOME137833_00107	Acetylornithine deacetylase	d__Bacteria;p__Actinobacteriota;c__Coriobacteriia;o__Coriobacteriales;f__Coriobacteriaceae;g__Collinsella;s__	p__Actinobacteriota	3.9e-10	35.5	321	1	[[8, 393]]	4.8e-10	GUT_GENOME137833	MAG	NielsenHB_2014__V1_UC31_4__bin.41	60.37	102206
GUT_GENOME140065_03137	Peptidase T	d__Bacteria;p__Firmicutes_A;c__Clostridia;o__Lachnospirales;f__Lachnospiraceae;g__GCA-900066135;s__GCA-900066135 sp900066135	p__Firmicutes_A	2e-17	60.4	241	1	[[10, 283]]	2.7e-17	GUT_GENOME140065	Isolate	OF03-15BH	46.16	102271
GUT_GENOME139627_00864	N-formyl-4-amino-5-aminomethyl-2-methylpyrimidine deformylase	d__Bacteria;p__Firmicutes_A;c__Clostridia;o__Lachnospirales;f__Lachnospiraceae;g__Coprococcus_B;s__	p__Firmicutes_A	1.3e-08	31.1	234	1	[[0, 259]]	1.7e-08	GUT_GENOME139627	MAG	Obregon-TitoAJ_2015__SM01__bin.4	40.52	102234
GUT_GENOME139627_01367	putative hydrolase YxeP	d__Bacteria;p__Firmicutes_A;c__Clostridia;o__Lachnospirales;f__Lachnospiraceae;g__Coprococcus_B;s__	p__Firmicutes_A	2.1e-07	27	256	1	[[33, 304]]	4.1e-07	GUT_GENOME139627	MAG	Obregon-TitoAJ_2015__SM01__bin.4	40.52	102234
GUT_GENOME237779_01548	Acetylornithine deacetylase	d__Bacteria;p__Firmicutes_A;c__Clostridia;o__Lachnospirales;f__Lachnospiraceae;g__UBA9502;s__	p__Firmicutes_A	2.3e-21	72.4	301	1	[[16, 373]]	2.8e-21	GUT_GENOME237779	MAG	SRS476339_17	51.19	103598	0.0911577	0.0059761
GUT_GENOME237447_01318	putative hydrolase YxeP	d__Bacteria;p__Firmicutes_A;c__Clostridia;o__Oscillospirales;f__Acutalibacteraceae;g__DTU089_A;s__	p__Firmicutes_A	2e-07	26.6	237	1	[[23, 354]]	2.5e-07	GUT_GENOME237447	MAG	SRS476289_70	42.87	103576
GUT_GENOME024536_00309	putative succinyl-diaminopimelate desuccinylase	d__Bacteria;p__Actinobacteriota;c__Coriobacteriia;o__Coriobacteriales;f__Coriobacteriaceae;g__Collinsella;s__	p__Actinobacteriota	4.1e-11	38.7	303	1	[[10, 387]]	5.1e-11	GUT_GENOME024536	MAG	CosteaPI_2017__SID713B003-11-0-0__bin.9	60.3	100702
GUT_GENOME026702_00585	putative hydrolase YxeP	d__Bacteria;p__Firmicutes_A;c__Clostridia;o__Oscillospirales;f__Oscillospiraceae;g__CAG-110;s__CAG-110 sp000434635	p__Firmicutes_A	1.1e-06	24.4	270	1	[[36, 350]]	1.7e-06	GUT_GENOME026702	MAG	CosteaPI_2017__SID713B069-11-90-0__bin.17	56.77	100743	22.8806	0.0118001
GUT_GENOME000724_00585	putative hydrolase YxeP	d__Bacteria;p__Firmicutes_A;c__Clostridia;o__Clostridiales;f__Clostridiaceae;g__Clostridium;s__Clostridium saudiense	p__Firmicutes_A	1.4e-06	24.7	231	1	[[29, 323]]	2e-06	GUT_GENOME000724	Isolate	8080_1_77	27.91	100149	1.18505	0.0103456
GUT_GENOME001046_01740	N-acetyl-lysine deacetylase	d__Bacteria;p__Firmicutes;c__Bacilli;o__Erysipelotrichales;f__Erysipelotrichaceae;g__Holdemania;s__Holdemania filiformis	p__Firmicutes	3.6e-11	39.8	325	1	[[37, 376]]	4.6e-11	GUT_GENOME001046	Isolate	AF24-29	50.06	100192
GUT_GENOME001135_04660	Carboxypeptidase G2	d__Bacteria;p__Firmicutes_A;c__Clostridia;o__Lachnospirales;f__Lachnospiraceae;g__Clostridium_M;s__Clostridium_M citroniae	p__Firmicutes_A	2.4e-21	74.1	327	1	[[1, 388]]	2.8e-21	GUT_GENOME001135	Isolate	AF29-4	49.48	100198
GUT_GENOME001135_00874	Acetylornithine deacetylase	d__Bacteria;p__Firmicutes_A;c__Clostridia;o__Lachnospirales;f__Lachnospiraceae;g__Clostridium_M;s__Clostridium_M citroniae	p__Firmicutes_A	1.2e-07	29	245	1	[[38, 392]]	1.4e-07	GUT_GENOME001135	Isolate	AF29-4	49.48	100198
GUT_GENOME078005_01991	Carboxypeptidase G2	d__Bacteria;p__Fusobacteriota;c__Fusobacteriia;o__Fusobacteriales;f__Fusobacteriaceae;g__Fusobacterium_B;s__	p__Fusobacteriota	1.7e-37	126.1	379	1	[[0, 369]]	2.4e-37	GUT_GENOME078005	MAG	ERS473221_41	28.22	101073
[truncated: 894 more rows]
