# Supplementary material for: SIMMER employs similarity algorithms to accurately identify human gut microbiome species and enzymes capable of known chemical transformations
Source: eLife. 2023 Jun 12;12:e82401. doi: 10.7554/eLife.82401 (PMC10289814; doi:10.7554/eLife.82401)
Supplement: Figure 8—source data 1. [file elife-82401-fig8-data1.xlsx]

## Sheet: Figure 8
Name	Alternate name	ATCC/DSMZ Identifier	Assembly file name	Phylum	HPLC MTX peak decreased by at least 50% (y/n)	SIMMER MTX->DAMPA predicted strain (y/n)	SIMMER MTX->DAMPA predicted enzyme found in assembly file via DIAMOND (y/n)	AcrAB efflux present (y/n)	AcrA (pident and cov to P0AE06)	AcrB (pident and cov to P31224)
Bacteroides thetaiotaomicron		DSM 2079	GCF_000011065.1_ASM1106v1_genomic.fna.gz	Bacteroidetes	n	n	n	n	27.4, 88.7	41.9, 98.5
Clostridium asparagiforme	Enterocloster asparagiformis	DSM 15981	GCF_000158075.1_ASM15807v1_genomic.fna.gz	Firmicutes	y	y	y	n	NaN	22.0, 97.8
Clostridium sporogenes	deposited as Clostridium botulinum in UHGG	ATCC 15579	GCF_000155085.1_ASM15508v1_genomic.fna.gz	Firmicutes	y	y	y	n	NaN	NaN
Clostridium symbiosum	ATCC 14940	DSM 934	GCF_000466485.1_ASM46648v1_genomic.fna.gz	Firmicutes	y	y	y	n	NaN	23.8, 99.0
Akkermansia muciniphila		DSM 22959	GCF_000020225.1_ASM2022v1_genomic.fna.gz	Verrucomicobia	n	n	n	n	38.2, 86.1	51.2, 97.8
Alistipes shahii		DSM 19121	GCF_000210575.1_ASM21057v1_genomic.fna.gz	Bacteroidetes	n	y	y	n	28.7, 83.6	41.1, 99.1
Bacteroides caccae		DSM 19024	GCF_018292205.1_ASM1829220v1_genomic.fna.gz	Bacteroidetes	n	n	n	n	28.1, 91.2	40.0, 98.6
Bacteroides eggerthii		DSM 20697	GCF_025146565.1_ASM2514656v1_genomic.fna.gz	Bacteroidetes	n	n	n	n	29.5, 90.4	39.9, 99.0
Bacteroides finegoldii		DSM 17565	GCF_000156195.1_ASM15619v1_genomic.fna.gz	Bacteroidetes	n	n	n	n	28.7, 90.4	40.7, 98.1
Bacteroides fragilis		DSM 2151	GCF_000025985.1_ASM2598v1_genomic.fna.gz	Bacteroidetes	n	n	n	n	27.8, 90.9	41.6, 97.9
Bacteroides ovatus		DSM 1896	GCF_900107475.1_IMG-taxon_2693429857_annotated_assembly_genomic.fna.gz	Bacteroidetes	n	n	n	n	29.3, 91.7	40.8, 99.0
Bacteroides stercoris		DSM 19555	GCF_900106605.1_IMG-taxon_2693429855_annotated_assembly_genomic.fna.gz	Bacteroidetes	n	n	n	n	29.5, 91.2	39.6, 99.6
Bacteroides uniformis		DSM 6597	GCF_900107315.1_IMG-taxon_2693429911_annotated_assembly_genomic.fna.gz	Bacteroidetes	n	n	n	n	29.7, 91.2	40.7, 99.0
Bacteroides vulgatus	Phocaeicola vulgatus	DSM 1447	GCF_000012825.1_ASM1282v1_genomic.fna.gz	Bacteroidetes	n	n	n	n	33.0, 82.9	41.0, 97.9
Bacteroides xylanisolvens		DSM 18836	GCF_000210075.1_ASM21007v1_genomic.fna.gz	Bacteroidetes	n	n	n	n	29.2, 91.2	41.0, 98.8
Bifidobacterium longum subsp longum		DSM 20219	GCF_900637335.1_50618_H02_genomic.fna.gz	Actinobacteria	n	n	n	n	NaN	NaN
Blautia producta	ATCC 35244	DSM 3507	GCF_002915535.1_ASM291553v1_genomic.fna.gz	Firmicutes	y	y	y	n	NaN	24.3, 75.4
Clostridium innocuum		DSM 1286	GCF_012317185.1_ASM1231718v1_genomic.fna.gz	Firmicutes	y	n	n	n	NaN	NaN
Clostridium scindens		DSM 5676	GCF_004295125.1_ASM429512v1_genomic.fna.gz	Firmicutes	y	n	n	n	NaN	23.8, 74.9
Collinsella aerofaciens		DSM 3979	GCF_000169035.1_ASM16903v1_genomic.fna.gz	Actinobacteria	n	y	y	n	NaN	NaN
Dorea formicigenerans		DSM 3992	GCF_000169235.1_ASM16923v1_genomic.fna.gz	Firmicutes	n	n	n	n	NaN	NaN
Dorea longicatena		DSM 13814	GCF_025150085.1_ASM2515008v1_genomic.fna.gz	Firmicutes	n	y	y	n	NaN	NaN
Edwardsiella tarda		ATCC 23685	GCF_000163955.1_ASM16395v1_genomic.fna.gz	Proteobacteria	n	y	y	y	70.7, 71.8	80.9, 100.0
Eggerthella lenta 1-3-56 DSM 110906		DSM 110906	GCF_000185625.1_ASM18562v1_genomic.fna.gz	Actinobacteria	n	n	n	n	NaN	NaN
Eggerthella lenta		DSM 2243	GCF_000024265.1_ASM2426v1_genomic.fna.gz	Actinobacteria	n	n	n	n	NaN	NaN
Eggerthella sinensis		DSM 16107	GCF_003725965.1_ASM372596v1_genomic.fna.gz	Actinobacteria	n	n	n	n	NaN	NaN
Eggerthella sp.		DSM 11767	GCF_003340045.1_ASM334004v1_genomic.fna.gz	Actinobacteria	n	n	n	n	NaN	NaN
Enterococcus faecalis		DSM 2570	Enterococcus_faecalis_ATCC_29212.fasta	Firmicutes	n	y	y	n	NaN	NaN
Escherichia coli BW25113 DSM 27469		DSM 27469	GCF_000750555.1_ASM75055v1_genomic.fna.gz	Proteobacteria	n	y	y	y	100.0, 100.0	100.0, 100.0
Eubacterium eligens	Lachnospira eligens	DSM 3376	GCF_000146185.1_ASM14618v1_genomic.fna.gz	Firmicutes	y	n	n	n	NaN	NaN
Eubacterium hallii	Anaerobutyricum hallii	DSM 3353	GCF_000173975.1_ASM17397v1_genomic.fna.gz	Firmicutes	y	y	y	n	NaN	22.4, 80.6
Eubacterium rectale	Agathobacter rectalis	DSM 17629	GCA_000209935.1_ASM20993v1_genomic.fna.gz	Firmicutes	n	n	n	n	NaN	22.2, 75.5
Faecalibacterium prausnitzii	Faecalibacterium duncaniae	DSM 17677	GCF_002734145.1_ASM273414v1_genomic.fna.gz	Firmicutes	n	n	n	n	NaN	22.6, 74.9
Fusobacterium nucleatum subsp. nucleatum		DSM 15643	Fusobacterium_nucleatum_subsp_nucleatum_ATCC_25586.fasta	Fusobacteria	n	n	n	n	NaN	21.3, 98.1
Gordonibacter pamelae DSM 110924		DSM 110924	GCF_003340385.1_ASM334038v1_genomic.fna.gz	Actinobacteria	n	n	n	n	NaN	NaN
Lactococcus lactis DSM 20481		DSM 20481	Lactococcus_lactis_ATCC_19435.fasta	Firmicutes	n	n	n	n	NaN	NaN
Lactonifactor longoviformis		DSM 17459	GCF_002915525.1_ASM291552v1_genomic.fna.gz	Firmicutes	y	y	y	n	NaN	22.2, 75.3
Parabacteroides distasonis		DSM 20701	GCF_000012845.1_ASM1284v1_genomic.fna.gz	Bacteroidetes	n	n	n	n	31.1, 91.2	40.9, 98.2
Parabacteroides merdae		DSM 19495	GCF_000154105.1_ASM15410v1_genomic.fna.gz	Bacteroidetes	n	n	n	n	31.4, 97.2	40.4, 98.0
Prevotella copri		DSM 18205	GCF_000157935.1_ASM15793v1_genomic.fna.gz	Bacteroidetes	n	n	n	n	NaN	35.6, 97.6
Providencia rettgeri		DSM 4542	Providencia_rettgeri_ATCC_29944.fasta	Proteobacteria	n	y	y	y	67.3, 99.2	75.6, 99.5
Ruminococcus obeum	Blautia obeum	DSM 25238	GCF_000153905.1_ASM15390v1_genomic.fna.gz	Firmicutes	y	n	n	n	NaN	NaN
						Fisher Exact (OR, p_val):	(5.3571, 0.0459)

## Sheet: Figure 8-figure supplement 1
Assembly file name	Name	Alternate name	ATCC/DSMZ Identifier	Phylum	MTX peak decreased (y/n)	DrugBug predicted strain (y/n)
GCF_000011065.1_ASM1106v1_genomic.fna.gz	Bacteroides thetaiotaomicron		DSM 2079	Bacteroidetes	n	y
GCF_000158075.1_ASM15807v1_genomic.fna.gz	Clostridium asparagiforme	Enterocloster asparagiformis	DSM 15981	Firmicutes	y	n
GCF_000155085.1_ASM15508v1_genomic.fna.gz	Clostridium sporogenes	deposited as Clostridium botulinum in UHGG	ATCC 15579	Firmicutes	y	n
GCF_000466485.1_ASM46648v1_genomic.fna.gz	Clostridium symbiosum	ATCC 14940	DSM 934	Firmicutes	y	n
GCF_000020225.1_ASM2022v1_genomic.fna.gz	Akkermansia muciniphila		DSM 22959	Verrucomicobia	n	y
GCF_000210575.1_ASM21057v1_genomic.fna.gz	Alistipes shahii		DSM 19121	Bacteroidetes	n	y
GCF_018292205.1_ASM1829220v1_genomic.fna.gz	Bacteroides caccae		DSM 19024	Bacteroidetes	n	y
GCF_025146565.1_ASM2514656v1_genomic.fna.gz	Bacteroides eggerthii		DSM 20697	Bacteroidetes	n	y
GCF_000156195.1_ASM15619v1_genomic.fna.gz	Bacteroides finegoldii		DSM 17565	Bacteroidetes	n	y
GCF_000025985.1_ASM2598v1_genomic.fna.gz	Bacteroides fragilis		DSM 2151	Bacteroidetes	n	y
GCF_900107475.1_IMG-taxon_2693429857_annotated_assembly_genomic.fna.gz	Bacteroides ovatus		DSM 1896	Bacteroidetes	n	y
GCF_900106605.1_IMG-taxon_2693429855_annotated_assembly_genomic.fna.gz	Bacteroides stercoris		DSM 19555	Bacteroidetes	n	y
GCF_900107315.1_IMG-taxon_2693429911_annotated_assembly_genomic.fna.gz	Bacteroides uniformis		DSM 6597	Bacteroidetes	n	y
GCF_000012825.1_ASM1282v1_genomic.fna.gz	Bacteroides vulgatus	Phocaeicola vulgatus	DSM 1447	Bacteroidetes	n	y
GCF_000210075.1_ASM21007v1_genomic.fna.gz	Bacteroides xylanisolvens		DSM 18836	Bacteroidetes	n	y
GCF_900637335.1_50618_H02_genomic.fna.gz	Bifidobacterium longum subsp longum		DSM 20219	Actinobacteria	n	n
GCF_002915535.1_ASM291553v1_genomic.fna.gz	Blautia producta	ATCC 35244	DSM 3507	Firmicutes	y	n
GCF_012317185.1_ASM1231718v1_genomic.fna.gz	Clostridium innocuum		DSM 1286	Firmicutes	y	n
GCF_004295125.1_ASM429512v1_genomic.fna.gz	Clostridium scindens		DSM 5676	Firmicutes	y	n
GCF_000169035.1_ASM16903v1_genomic.fna.gz	Collinsella aerofaciens		DSM 3979	Actinobacteria	n	n
GCF_000169235.1_ASM16923v1_genomic.fna.gz	Dorea formicigenerans		DSM 3992	Firmicutes	n	n
GCF_025150085.1_ASM2515008v1_genomic.fna.gz	Dorea longicatena		DSM 13814	Firmicutes	n	n
GCF_000163955.1_ASM16395v1_genomic.fna.gz	Edwardsiella tarda		ATCC 23685	Proteobacteria	n	y
GCF_000185625.1_ASM18562v1_genomic.fna.gz	Eggerthella lenta 1-3-56 DSM 110906		DSM 110906	Actinobacteria	n	n
GCF_000024265.1_ASM2426v1_genomic.fna.gz	Eggerthella lenta		DSM 2243	Actinobacteria	n	n
GCF_003725965.1_ASM372596v1_genomic.fna.gz	Eggerthella sinensis		DSM 16107	Actinobacteria	n	n
GCF_003340045.1_ASM334004v1_genomic.fna.gz	Eggerthella sp.		DSM 11767	Actinobacteria	n	n
Enterococcus_faecalis_ATCC_29212.fasta	Enterococcus faecalis		DSM 2570	Firmicutes	n	n
GCF_000750555.1_ASM75055v1_genomic.fna.gz	Escherichia coli BW25113 DSM 27469		DSM 27469	Proteobacteria	n	n
GCF_000146185.1_ASM14618v1_genomic.fna.gz	Eubacterium eligens	Lachnospira eligens	DSM 3376	Firmicutes	y	n
GCF_000173975.1_ASM17397v1_genomic.fna.gz	Eubacterium hallii	Anaerobutyricum hallii	DSM 3353	Firmicutes	y	n
GCA_000209935.1_ASM20993v1_genomic.fna.gz	Eubacterium rectale	Agathobacter rectalis	DSM 17629	Firmicutes	n	n
GCF_002734145.1_ASM273414v1_genomic.fna.gz	Faecalibacterium prausnitzii	Faecalibacterium duncaniae	DSM 17677	Firmicutes	n	n
Fusobacterium_nucleatum_subsp_nucleatum_ATCC_25586.fasta	Fusobacterium nucleatum subsp. nucleatum		DSM 15643	Fusobacteria	n	y
GCF_003340385.1_ASM334038v1_genomic.fna.gz	Gordonibacter pamelae DSM 110924		DSM 110924	Actinobacteria	n	n
Lactococcus_lactis_ATCC_19435.fasta	Lactococcus lactis DSM 20481		DSM 20481	Firmicutes	n	n
GCF_002915525.1_ASM291552v1_genomic.fna.gz	Lactonifactor longoviformis		DSM 17459	Firmicutes	y	n
GCF_000012845.1_ASM1284v1_genomic.fna.gz	Parabacteroides distasonis		DSM 20701	Bacteroidetes	n	y
GCF_000154105.1_ASM15410v1_genomic.fna.gz	Parabacteroides merdae		DSM 19495	Bacteroidetes	n	y
GCF_000157935.1_ASM15793v1_genomic.fna.gz	Prevotella copri		DSM 18205	Bacteroidetes	n	y
Providencia_rettgeri_ATCC_29944.fasta	Providencia rettgeri		DSM 4542	Proteobacteria	n	y
GCF_000153905.1_ASM15390v1_genomic.fna.gz	Ruminococcus obeum	Blautia obeum	DSM 25238	Firmicutes	y	n

## Sheet: Figure 8-figure supplement 2
				MTX depleted in HPLC assay but not SIMMER predicted.				MTX depleted in HPLC assay and is SIMMER predicted.
Sterile control Day 0		Sterile control Day 3		C. innocuum Day 0		C. innocuum Day 3		C. asparigiforme Day 0		C. asparigiforme Day 3
0.00291667	-16.8757	0.00625	-16.8052	0.00436667	-15.1229	0.00603333	-9.92584	0.00416667	-11.0493	0.000833333	-14.9407
0.00958333	-16.8233	0.0129167	-16.7193	0.0110333	-14.9579	0.0127	-9.89151	0.0108333	-10.9334	0.0075	-14.9975
0.01625	-16.7398	0.0195833	-16.6068	0.0177	-14.7896	0.0193667	-9.89056	0.0175	-10.797	0.0141667	-15.0127
0.0229167	-16.6335	0.02625	-16.4752	0.0243667	-14.637	0.0260333	-9.95159	0.0241667	-10.6573	0.0208333	-14.987
0.0295833	-16.5205	0.0329167	-16.3388	0.0310333	-14.5307	0.0327	-10.0856	0.0308333	-10.5424	0.0275	-14.9312
0.03625	-16.4247	0.0395833	-16.2163	0.0377	-14.4925	0.0393667	-10.2844	0.0375	-10.4766	0.0341667	-14.8606
0.0429167	-16.3655	0.04625	-16.1219	0.0443667	-14.5326	0.0460333	-10.5314	0.0441667	-10.4694	0.0408333	-14.7953
0.0495833	-16.3465	0.0529167	-16.0642	0.0510333	-14.6389	0.0527	-10.798	0.0508333	-10.5071	0.0475	-14.7476
0.05625	-16.3646	0.0595833	-16.0508	0.0577	-14.7986	0.0593667	-11.0512	0.0575	-10.5767	0.0541667	-14.7262
0.0629167	-16.4199	0.06625	-16.0871	0.0643667	-14.9941	0.0660333	-11.2629	0.0641667	-10.6654	0.0608333	-14.74
0.0695833	-16.51	0.0729167	-16.1643	0.0710333	-15.202	0.0727	-11.4217	0.0708333	-10.7608	0.0675	-14.7905
0.07625	-16.6206	0.0795833	-16.2582	0.0777	-15.3999	0.0793667	-11.5323	0.0775	-10.848	0.0741667	-14.8635
0.0829167	-16.7313	0.08625	-16.3388	0.0843667	-15.5692	0.0860333	-11.6019	0.0841667	-10.9167	0.0808333	-14.9326
0.0895833	-16.8257	0.0929167	-16.3822	0.0910333	-15.6975	0.0927	-11.6324	0.0908333	-10.9606	0.0875	-14.9751
0.09625	-16.8858	0.0995833	-16.376	0.0977	-15.7762	0.0993667	-11.6215	0.0975	-10.9744	0.0941667	-14.9765
0.102917	-16.8877	0.10625	-16.3193	0.104367	-15.7995	0.106033	-11.5666	0.104167	-10.9529	0.100833	-14.9317
0.109583	-16.8152	0.112917	-16.2244	0.111033	-15.7719	0.1127	-11.4741	0.110833	-10.8933	0.1075	-14.842
0.11625	-16.6717	0.119583	-16.109	0.1177	-15.7008	0.119367	-11.3535	0.1175	-10.7989	0.114167	-14.7166
0.122917	-16.4795	0.12625	-15.9941	0.124367	-15.5993	0.126033	-11.2185	0.124167	-10.6816	0.120833	-14.5712
0.129583	-16.2706	0.132917	-15.8963	0.131033	-15.4791	0.1327	-11.0807	0.130833	-10.5572	0.1275	-14.4234
0.13625	-16.0756	0.139583	-15.8243	0.1377	-15.3494	0.139367	-10.9496	0.1375	-10.4408	0.134167	-14.2875
0.142917	-15.9197	0.14625	-15.7752	0.144367	-15.2149	0.146033	-10.8309	0.144167	-10.3393	0.140833	-14.1726
0.149583	-15.8138	0.152917	-15.7399	0.151033	-15.0762	0.1527	-10.725	0.150833	-10.252	0.1475	-14.081
0.15625	-15.7509	0.159583	-15.7075	0.1577	-14.9307	0.159367	-10.6287	0.1575	-10.1738	0.154167	-14.0119
0.162917	-15.7132	0.16625	-15.6698	0.164367	-14.7743	0.166033	-10.5391	0.164167	-10.0999	0.160833	-13.9637
0.169583	-15.6827	0.172917	-15.6231	0.171033	-14.6055	0.1727	-10.4551	0.170833	-10.0284	0.1675	-13.9327
0.17625	-15.6493	0.179583	-15.5649	0.1777	-14.4258	0.179367	-10.3779	0.1775	-9.95874	0.174167	-13.9146
0.182917	-15.6074	0.18625	-15.4934	0.184367	-14.235	0.186033	-10.3059	0.184167	-9.88865	0.180833	-13.905
0.189583	-15.5554	0.192917	-15.4057	0.191033	-14.0357	0.1927	-10.2372	0.190833	-9.81522	0.1875	-13.8993
0.19625	-15.491	0.199583	-15.3012	0.1977	-13.8278	0.199367	-10.1686	0.1975	-9.73415	0.194167	-13.8946
0.202917	-15.4109	0.20625	-15.1806	0.204367	-13.607	0.206033	-10.0956	0.204167	-9.63831	0.200833	-13.8898
0.209583	-15.3117	0.212917	-15.0423	0.211033	-13.3681	0.2127	-10.0145	0.210833	-9.52339	0.2075	-13.8817
0.21625	-15.1925	0.219583	-14.884	0.2177	-13.1102	0.219367	-9.92346	0.2175	-9.38892	0.214167	-13.8693
0.222917	-15.0537	0.22625	-14.7033	0.224367	-12.8341	0.226033	-9.82094	0.224167	-9.23538	0.220833	-13.8497
0.229583	-14.8969	0.232917	-14.4992	0.231033	-12.5399	0.2327	-9.70602	0.230833	-9.06324	0.2275	-13.8183
0.23625	-14.72	0.239583	-14.2717	0.2377	-12.228	0.239367	-9.5768	0.2375	-8.86965	0.234167	-13.7711
0.242917	-14.5221	0.24625	-14.0219	0.244367	-11.8957	0.246033	-9.42945	0.244167	-8.64887	0.240833	-13.7076
0.249583	-14.3018	0.252917	-13.751	0.251033	-11.5438	0.2527	-9.25922	0.250833	-8.39853	0.2475	-13.6271
0.25625	-14.0581	0.259583	-13.4602	0.2577	-11.1713	0.259367	-9.06372	0.2575	-8.11863	0.254167	-13.5298
0.262917	-13.793	0.26625	-13.1502	0.264367	-10.7803	0.266033	-8.84342	0.264167	-7.81155	0.260833	-13.4144
0.269583	-13.5074	0.272917	-12.8188	0.271033	-10.3769	0.2727	-8.5988	0.270833	-7.4811	0.2675	-13.2804
0.27625	-13.2027	0.279583	-12.4645	0.2777	-9.9678	0.279367	-8.33082	0.2775	-7.13396	0.274167	-13.1259
0.282917	-12.8803	0.28625	-12.0888	0.284367	-9.56154	0.286033	-8.04043	0.284167	-6.77395	0.280833	-12.9476
0.289583	-12.5389	0.292917	-11.693	0.291033	-9.1629	0.2927	-7.72858	0.290833	-6.40106	0.2875	-12.743
0.29625	-12.1775	0.299583	-11.2824	0.2977	-8.77666	0.299367	-7.39431	0.2975	-6.01387	0.294167	-12.5141
0.302917	-11.796	0.30625	-10.8619	0.304367	-8.40425	0.306033	-7.04002	0.304167	-5.61237	0.300833	-12.2619
0.309583	-11.3974	0.312917	-10.4394	0.311033	-8.04853	0.3127	-6.66904	0.310833	-5.20134	0.3075	-11.9882
0.31625	-10.9863	0.319583	-10.0222	0.3177	-7.71093	0.319367	-6.28996	0.3175	-4.78792	0.314167	-11.693
0.322917	-10.5715	0.32625	-9.61494	0.324367	-7.39288	0.326033	-5.90944	0.324167	-4.37927	0.320833	-11.375
0.329583	-10.1609	0.332917	-9.22537	0.331033	-7.09486	0.3327	-5.5356	0.330833	-3.98302	0.3275	-11.0359
0.33625	-9.76133	0.339583	-8.85725	0.3377	-6.81591	0.339367	-5.17368	0.3375	-3.60155	0.334167	-10.6773
0.342917	-9.37796	0.34625	-8.51345	0.344367	-6.55508	0.346033	-4.82559	0.344167	-3.23629	0.340833	-10.3025
0.349583	-9.01508	0.352917	-8.19492	0.351033	-6.31046	0.3527	-4.49324	0.350833	-2.88677	0.3475	-9.91535
0.35625	-8.6751	0.359583	-7.90071	0.3577	-6.08063	0.359367	-4.17614	0.3575	-2.55442	0.354167	-9.52148
0.362917	-8.35896	0.36625	-7.62892	0.364367	-5.86271	0.366033	-3.87335	0.364167	-2.23875	0.360833	-9.12905
0.369583	-8.06618	0.372917	-7.37619	0.371033	-5.65672	0.3727	-3.58343	0.370833	-1.93882	0.3675	-8.74281
0.37625	-7.79533	0.379583	-7.13873	0.3777	-5.46169	0.379367	-3.30639	0.3775	-1.65367	0.374167	-8.36658
0.382917	-7.54499	0.38625	-6.91557	0.384367	-5.27906	0.386033	-3.04174	0.384167	-1.38235	0.380833	-8.00276
0.389583	-7.31277	0.392917	-6.70528	0.391033	-5.10836	0.3927	-2.78759	0.390833	-1.12295	0.3875	-7.6561
0.39625	-7.09724	0.399583	-6.50883	0.3977	-4.94766	0.399367	-2.54393	0.3975	-0.873089	0.394167	-7.32994
0.402917	-6.89602	0.40625	-6.32477	0.404367	-4.79698	0.406033	-2.31028	0.404167	-0.631809	0.400833	-7.02429
0.409583	-6.70671	0.412917	-6.15406	0.411033	-4.65536	0.4127	-2.08569	0.410833	-0.400066	0.4075	-6.73819
0.41625	-6.53028	0.419583	-5.99623	0.4177	-4.52232	0.419367	-1.87063	0.4175	-0.178814	0.414167	-6.47211
0.422917	-6.36625	0.42625	-5.85032	0.424367	-4.39596	0.426033	-1.66512	0.424167	0.0309944	0.420833	-6.2232
0.429583	-6.2151	0.432917	-5.71442	0.431033	-4.27532	0.4327	-1.46914	0.430833	0.227451	0.4275	-5.98812
0.43625	-6.07538	0.439583	-5.58853	0.4377	-4.1604	0.439367	-1.28317	0.4375	0.41008	0.434167	-5.76591
0.442917	-5.94616	0.44625	-5.47123	0.444367	-4.05216	0.446033	-1.10531	0.444167	0.57888	0.440833	-5.55515
0.449583	-5.82647	0.452917	-5.36203	0.451033	-3.9506	0.4527	-0.935078	0.450833	0.734806	0.4475	-5.35583
0.45625	-5.71537	0.459583	-5.25999	0.4577	-3.85571	0.459367	-0.772476	0.4575	0.877857	0.454167	-5.16796
0.462917	-5.61285	0.46625	-5.1651	0.464367	-3.76797	0.466033	-0.617504	0.464167	1.00613	0.460833	-4.99153
0.469583	-5.51701	0.472917	-5.07689	0.471033	-3.6869	0.4727	-0.469685	0.470833	1.12057	0.4675	-4.82607
0.47625	-5.42736	0.479583	-4.99487	0.4777	-3.61204	0.479367	-0.329971	0.4775	1.22309	0.474167	-4.67014
0.482917	-5.34391	0.48625	-4.9181	0.484367	-3.54338	0.486033	-0.198841	0.484167	1.31464	0.480833	-4.5228
0.489583	-5.26619	0.492917	-4.84657	0.491033	-3.47948	0.4927	-0.0767708	0.490833	1.39475	0.4875	-4.38213
0.49625	-5.19371	0.499583	-4.77886	0.4977	-3.42035	0.499367	0.0371933	0.4975	1.46532	0.494167	-4.24767
0.502917	-5.12505	0.50625	-4.71687	0.504367	-3.36361	0.506033	0.143528	0.504167	1.52874	0.500833	-4.11797
0.509583	-5.06067	0.512917	-4.66013	0.511033	-3.30782	0.5127	0.243664	0.510833	1.58644	0.5075	-3.99542
0.51625	-5.00011	0.519583	-4.60768	0.5177	-3.25251	0.519367	0.336647	0.5175	1.63555	0.514167	-3.88098
0.522917	-4.94432	0.52625	-4.55809	0.524367	-3.19433	0.526033	0.421047	0.524167	1.67656	0.520833	-3.7756
0.529583	-4.89426	0.532917	-4.51088	0.531033	-3.1085	0.5327	0.497341	0.530833	1.70946	0.5275	-3.6788
0.53625	-4.84943	0.539583	-4.46701	0.5377	-2.94447	0.539367	0.565529	0.5375	1.73569	0.534167	-3.58868
0.542917	-4.80843	0.54625	-4.42505	0.544367	-2.6598	0.546033	0.627995	0.544167	1.75714	0.540833	-3.50618
0.549583	-4.76933	0.552917	-4.38499	0.551033	-2.27261	0.5527	0.686169	0.550833	1.7848	0.5475	-3.42941
0.55625	-4.73022	0.559583	-4.34589	0.5577	-1.85871	0.559367	0.745296	0.5575	1.85776	0.554167	-3.35741
0.562917	-4.68969	0.56625	-4.30822	0.564367	-1.50013	0.566033	0.835896	0.564167	2.03371	0.560833	-3.29018
0.569583	-4.64582	0.572917	-4.27151	0.571033	-1.26076	0.5727	1.02091	0.570833	2.33889	0.5675	-3.22628
0.57625	-4.58813	0.579583	-4.23574	0.5777	-1.18637	0.579367	1.3423	0.5775	2.73085	0.574167	-3.16429
0.582917	-4.48179	0.58625	-4.19998	0.584367	-1.27125	0.586033	1.76716	0.584167	3.12233	0.580833	-3.09181
0.589583	-4.26054	0.592917	-4.16565	0.591033	-1.4348	0.5927	2.19488	0.590833	3.44276	0.5875	-2.96879
0.59625	-3.86858	0.599583	-4.13227	0.5977	-1.56784	0.599367	2.52914	0.5975	3.64256	0.594167	-2.73561
0.602917	-3.3164	0.60625	-4.09651	0.604367	-1.61695	0.606033	2.71416	0.604167	3.66831	0.600833	-2.36607
0.609583	-2.68459	0.612917	-4.03833	0.611033	-1.59025	0.6127	2.738	0.610833	3.50046	0.6075	-1.90687
0.61625	-2.0771	0.619583	-3.9134	0.6177	-1.52636	0.619367	2.64072	0.6175	3.22008	0.614167	-1.45006
0.622917	-1.57928	0.62625	-3.66926	0.624367	-1.50251	0.626033	2.50149	0.624167	2.9788	0.620833	-1.07241
0.629583	-1.26076	0.632917	-3.27921	0.631033	-1.62315	0.6327	2.38705	0.630833	2.87867	0.6275	-0.830173
0.63625	-1.16682	0.639583	-2.75993	0.6377	-1.94836	0.639367	2.31171	0.6375	2.91014	0.634167	-0.786304
0.642917	-1.30129	0.64625	-2.1615	0.644367	-2.41518	0.646033	2.24876	0.644167	3.01456	0.640833	-0.97847
0.649583	-1.62458	0.652917	-1.56689	0.651033	-2.86293	0.6527	2.14815	0.650833	3.15332	0.6475	-1.34993
0.65625	-2.08187	0.659583	-1.09673	0.6577	-3.14617	0.659367	1.97029	0.6575	3.27396	0.654167	-1.73998
0.662917	-2.63834	0.66625	-0.876904	0.664367	-3.21531	0.666033	1.75428	0.664167	3.28112	0.660833	-1.98793
0.669583	-3.27206	0.672917	-0.974655	0.671033	-3.10469	0.6727	1.60551	0.670833	3.09658	0.6675	-2.04325
0.67625	-3.93486	0.679583	-1.37424	0.6777	-2.87104	0.679367	1.58834	0.6775	2.72322	0.674167	-1.95503
0.682917	-4.51756	0.68625	-2.00081	0.684367	-2.57969	0.686033	1.66035	0.684167	2.22397	0.680833	-1.78909
0.689583	-4.89855	0.692917	-2.73943	0.691033	-2.32506	0.6927	1.73378	0.690833	1.65701	0.6875	-1.6036
0.69625	-5.01776	0.699583	-3.43943	0.6977	-2.19202	0.699367	1.74713	0.6975	1.0767	0.694167	-1.5049
0.702917	-4.89807	0.70625	-3.95393	0.704367	-2.17485	0.706033	1.64938	0.704167	0.57745	0.700833	-1.62125
0.709583	-4.58717	0.712917	-4.20332	0.711033	-2.1677	0.7127	1.4081	0.710833	0.291348	0.7075	-1.99413
0.71625	-4.11844	0.719583	-4.18806	0.7177	-2.04182	0.719367	1.06382	0.7175	0.319958	0.714167	-2.51579
0.722917	-3.53241	0.72625	-3.94344	0.724367	-1.73712	0.726033	0.733376	0.724167	0.660419	0.720833	-2.98214
0.729583	-2.90108	0.732917	-3.52001	0.731033	-1.28698	0.7327	0.537395	0.730833	1.2126	0.7275	-3.22914
0.73625	-2.31886	0.739583	-2.99549	0.7377	-0.783443	0.739367	0.52166	0.7375	1.83964	0.734167	-3.21007
0.742917	-1.87349	0.74625	-2.46191	0.744367	-0.335217	0.746033	0.649452	0.744167	2.41518	0.740833	-2.97785
0.749583	-1.62888	0.752917	-1.99556	0.751033	-0.0357628	0.7527	0.844955	0.750833	2.83337	0.7475	-2.60592
0.75625	-1.63174	0.759583	-1.64986	0.7577	0.0424385	0.759367	1.04427	0.7575	3.02696	0.754167	-2.16198
0.762917	-1.9002	0.76625	-1.48106	0.764367	-0.126362	0.766033	1.21927	0.764167	3.01313	0.760833	-1.74475
0.769583	-2.40517	0.772917	-1.52969	0.771033	-0.499249	0.7727	1.34563	0.770833	2.9006	0.7675	-1.46627
0.77625	-3.05033	0.779583	-1.79005	0.7777	-0.982285	0.779367	1.38664	0.7775	2.81906	0.774167	-1.36185
0.782917	-3.70073	0.78625	-2.21682	0.784367	-1.47009	0.786033	1.32895	0.784167	2.82288	0.780833	-1.36518
0.789583	-4.24528	0.792917	-2.74897	0.791033	-1.88732	0.7927	1.20068	0.790833	2.87104	0.7875	-1.39856
0.79625	-4.63676	0.799583	-3.3102	0.7977	-2.19822	0.799367	1.04904	0.7975	2.89011	0.794167	-1.44768
0.802917	-4.8728	0.80625	-3.8085	0.804367	-2.40374	0.806033	0.918865	0.804167	2.85196	0.800833	-1.52969
0.809583	-4.95672	0.812917	-4.16231	0.811033	-2.52628	0.8127	0.856876	0.810833	2.78711	0.8075	-1.61028
0.81625	-4.88615	0.819583	-4.33731	0.8177	-2.59495	0.819367	0.90313	0.8175	2.73132	0.814167	-1.59359
0.822917	-4.66728	0.82625	-4.354	0.824367	-2.63786	0.826033	1.05095	0.824167	2.69461	0.820833	-1.40858
0.829583	-4.34399	0.832917	-4.2758	0.831033	-2.67887	0.8327	1.23739	0.830833	2.67124	0.8275	-1.08862
0.83625	-4.00496	0.839583	-4.17614	0.8377	-2.73514	0.839367	1.38474	0.8375	2.65837	0.834167	-0.746727
0.842917	-3.74937	0.84625	-4.10175	0.844367	-2.80094	0.846033	1.42717	0.844167	2.64025	0.840833	-0.492096
0.849583	-3.62921	0.852917	-4.06599	0.851033	-2.84386	0.8527	1.32513	0.850833	2.57444	0.8475	-0.389099
0.85625	-3.62206	0.859583	-4.06504	0.8577	-2.83623	0.859367	1.08004	0.8575	2.42615	0.854167	-0.483036
0.862917	-3.67928	0.86625	-4.0741	0.864367	-2.79236	0.866033	0.747204	0.864167	2.21872	0.860833	-0.784397
0.869583	-3.77941	0.872917	-4.05216	0.871033	-2.76232	0.8727	0.416756	0.870833	2.02656	0.8675	-1.22738
0.87625	-3.92818	0.879583	-3.98445	0.8777	-2.79284	0.879367	0.169754	0.8775	1.90687	0.874167	-1.6818
0.882917	-4.1275	0.88625	-3.92294	0.884367	-2.90775	0.886033	0.043869	0.884167	1.85537	0.880833	-2.03943
0.889583	-4.37689	0.892917	-3.9506	0.891033	-3.12281	0.8927	0.0343323	0.890833	1.83153	0.8875	-2.26784
0.89625	-4.69303	0.899583	-4.11654	0.8977	-3.43943	0.899367	0.114918	0.8975	1.81293	0.894167	-2.39277
0.902917	-5.09119	0.90625	-4.42076	0.904367	-3.81994	0.906033	0.257969	0.904167	1.80531	0.900833	-2.45094
0.909583	-5.53513	0.912917	-4.82702	0.911033	-4.19188	0.9127	0.426769	0.910833	1.80435	0.9075	-2.47812
0.91625	-5.93567	0.919583	-5.26857	0.9177	-4.49324	0.919367	0.568867	0.9175	1.77717	0.914167	-2.51007
0.922917	-6.20699	0.92625	-5.65338	0.924367	-4.70829	0.926033	0.630856	0.924167	1.68896	0.920833	-2.57063
0.929583	-6.31857	0.932917	-5.90372	0.931033	-4.85563	0.9327	0.585556	0.930833	1.52922	0.9275	-2.65074
0.93625	-6.29663	0.939583	-5.99909	0.9377	-4.96244	0.939367	0.437737	0.9375	1.30129	0.934167	-2.71416
0.942917	-6.19364	0.94625	-5.97239	0.944367	-5.04541	0.946033	0.20647	0.944167	1.00374	0.940833	-2.74563
0.949583	-6.06394	0.952917	-5.88036	0.951033	-5.11646	0.9527	-0.0796318	0.950833	0.651836	0.9475	-2.77376
0.95625	-5.9495	0.959583	-5.77545	0.9577	-5.17988	0.959367	-0.374317	0.9575	0.298977	0.954167	-2.8429
0.962917	-5.88083	0.96625	-5.69725	0.964367	-5.23901	0.966033	-0.628471	0.964167	0.0104904	0.960833	-2.97832
0.969583	-5.87606	0.972917	-5.67007	0.971033	-5.29528	0.9727	-0.821114	0.970833	-0.181675	0.9675	-3.18575
0.97625	-5.93853	0.979583	-5.70631	0.9777	-5.34821	0.979367	-0.964642	0.9775	-0.293732	0.974167	-3.47042
0.982917	-6.05536	0.98625	-5.80263	0.984367	-5.3978	0.986033	-1.08194	0.984167	-0.359058	0.980833	-3.82042
0.989583	-6.20127	0.992917	-5.93853	0.991033	-5.4431	0.9927	-1.18732	0.990833	-0.406742	0.9875	-4.18615
0.99625	-6.35386	0.999583	-6.08969	0.9977	-5.48458	0.999367	-1.28412	0.9975	-0.451565	0.994167	-4.49848
1.00292	-6.50072	1.00625	-6.23703	1.00437	-5.5232	1.00603	-1.37472	1.00417	-0.499725	1.00083	-4.71878
1.00958	-6.63662	1.01292	-6.37341	1.01103	-5.55849	1.0127	-1.46008	1.01083	-0.552654	1.0075	-4.85468
1.01625	-6.75678	1.01958	-6.49691	1.0177	-5.59139	1.01937	-1.53923	1.0175	-0.607967	1.01417	-4.93908
1.02292	-6.8593	1.02625	-6.60563	1.02437	-5.62191	1.02603	-1.60885	1.02417	-0.665188	1.02083	-5.00154
1.02958	-6.9437	1.03292	-6.69861	1.03103	-5.65052	1.0327	-1.66845	1.03083	-0.721455	1.0275	-5.05781
1.03625	-7.01284	1.03958	-6.77681	1.0377	-5.67722	1.03937	-1.71947	1.0375	-0.77486	1.03417	-5.11217
1.04292	-7.07006	1.04625	-6.84261	1.04437	-5.70154	1.04603	-1.76287	1.04417	-0.823975	1.04083	-5.16605
1.04958	-7.11918	1.05292	-6.8984	1.05103	-5.72395	1.0527	-1.80006	1.05083	-0.869274	1.0475	-5.21851
1.05625	-7.16257	1.05958	-6.94704	1.0577	-5.74541	1.05937	-1.83201	1.0575	-0.911713	1.05417	-5.26953
1.06292	-7.20072	1.06625	-6.98948	1.06437	-5.76544	1.06603	-1.85966	1.06417	-0.94986	1.06083	-5.31721
1.06958	-7.23505	1.07292	-7.02667	1.07103	-5.78403	1.0727	-1.88446	1.07083	-0.984669	1.0675	-5.3606
1.07625	-7.26509	1.07958	-7.05862	1.0777	-5.80168	1.07937	-1.90639	1.0775	-1.01614	1.07417	-5.40113
1.08292	-7.29227	1.08625	-7.08723	1.08437	-5.81932	1.08603	-1.92547	1.08417	-1.04618	1.08083	-5.43785
1.08958	-7.31659	1.09292	-7.11393	1.09103	-5.83601	1.0927	-1.94263	1.09083	-1.07527	1.0875	-5.47123
1.09625	-7.33852	1.09958	-7.13873	1.0977	-5.85222	1.09937	-1.95789	1.0975	-1.10245	1.09417	-5.50175
1.10292	-7.35855	1.10625	-7.16162	1.10437	-5.86796	1.10603	-1.97077	1.10417	-1.12772	1.10083	-5.52988
1.10958	-7.3781	1.11292	-7.18355	1.11103	-5.88274	1.1127	-1.98174	1.11083	-1.15061	1.1075	-5.55563
1.11625	-7.3967	1.11958	-7.20453	1.1177	-5.89657	1.11937	-1.99223	1.1175	-1.17159	1.11417	-5.57995
1.12292	-7.41434	1.12625	-7.22408	1.12437	-5.90944	1.12603	-2.00224	1.12417	-1.19019	1.12083	-5.60284
1.12958	-7.43055	1.13292	-7.2422	1.13103	-5.92184	1.1327	-2.01225	1.13083	-1.20783	1.1275	-5.62477
1.13625	-7.44629	1.13958	-7.25842	1.1377	-5.93233	1.13937	-2.02131	1.1375	-1.22452	1.13417	-5.6448
1.14292	-7.46107	1.14625	-7.2732	1.14437	-5.94234	1.14603	-2.02942	1.14417	-1.24073	1.14083	-5.66387
1.14958	-7.4749	1.15292	-7.28655	1.15103	-5.95236	1.1527	-2.03753	1.15083	-1.25694	1.1475	-5.68247
1.15625	-7.4873	1.15958	-7.29847	1.1577	-5.96237	1.15937	-2.04515	1.1575	-1.27268	1.15417	-5.69963
1.16292	-7.49826	1.16625	-7.31039	1.16437	-5.97239	1.16603	-2.05183	1.16417	-1.28746	1.16083	-5.71585
1.16958	-7.50828	1.17292	-7.32136	1.17103	-5.9824	1.1727	-2.05755	1.17083	-1.30129	1.1675	-5.73063
1.17625	-7.51734	1.17958	-7.33232	1.1777	-5.99241	1.17937	-2.06375	1.1775	-1.31464	1.17417	-5.74493
1.18292	-7.52592	1.18625	-7.34234	1.18437	-6.00243	1.18603	-2.07043	1.18417	-1.32704	1.18083	-5.75829
1.18958	-7.53498	1.19292	-7.35283	1.19103	-6.01149	1.1927	-2.0771	1.19083	-1.33896	1.1875	-5.77116
1.19625	-7.54356	1.19958	-7.36284	1.1977	-6.01959	1.19937	-2.08235	1.1975	-1.35088	1.19417	-5.78403
1.20292	-7.55215	1.20625	-7.3719	1.20437	-6.02722	1.20603	-2.08664	1.20417	-1.36232	1.20083	-5.79739
1.20958	-7.56073	1.21292	-7.38049	1.21103	-6.03437	1.2127	-2.08998	1.21083	-1.37329	1.2075	-5.81026
1.21625	-7.56884	1.21958	-7.38859	1.2177	-6.042	1.21937	-2.09332	1.2175	-1.38378	1.21417	-5.82314
1.22292	-7.57551	1.22625	-7.39717	1.22437	-6.04963	1.22603	-2.09713	1.22417	-1.3938	1.22083	-5.83458
1.22958	-7.58171	1.23292	-7.4048	1.23103	-6.05774	1.2327	-2.10094	1.23083	-1.40429	1.2275	-5.84555
1.23625	-7.58743	1.23958	-7.41243	1.2377	-6.06632	1.23937	-2.10524	1.2375	-1.41382	1.23417	-5.85508
1.24292	-7.59411	1.24625	-7.42054	1.24437	-6.07443	1.24603	-2.10905	1.24417	-1.42384	1.24083	-5.86414
1.24958	-7.60078	1.25292	-7.42865	1.25103	-6.08206	1.2527	-2.11287	1.25083	-1.43337	1.2475	-5.87225
1.25625	-7.60746	1.25958	-7.43675	1.2577	-6.08921	1.25937	-2.11716	1.2575	-1.44196	1.25417	-5.88036
1.26292	-7.61366	1.26625	-7.4439	1.26437	-6.09589	1.26603	-2.12145	1.26417	-1.45006	1.26083	-5.88894
1.26958	-7.62033	1.27292	-7.4501	1.27103	-6.10113	1.2727	-2.12526	1.27083	-1.45721	1.2675	-5.89752
1.27625	-7.62606	1.27958	-7.45535	1.2777	-6.10638	1.27937	-2.1286	1.2775	-1.46341	1.27417	-5.90563
1.28292	-7.63178	1.28625	-7.45916	1.28437	-6.1121	1.28603	-2.13242	1.28417	-1.46866	1.28083	-5.91421
1.28958	-7.63655	1.29292	-7.46298	1.29103	-6.11734	1.2927	-2.13575	1.29083	-1.47438	1.2875	-5.92279
1.29625	-7.64132	1.29958	-7.46632	1.2977	-6.12211	1.29937	-2.13766	1.2975	-1.48058	1.29417	-5.9309
1.30292	-7.64513	1.30625	-7.47061	1.30437	-6.12688	1.30603	-2.13861	1.30417	-1.48678	1.30083	-5.93901
1.30958	-7.64894	1.31292	-7.47585	1.31103	-6.13117	1.3127	-2.13909	1.31083	-1.49298	1.3075	-5.94664
1.31625	-7.65228	1.31958	-7.4811	1.3177	-6.13546	1.31937	-2.14052	1.3175	-1.49918	1.31417	-5.95427
1.32292	-7.6561	1.32625	-7.48587	1.32437	-6.13928	1.32603	-2.14243	1.32417	-1.50442	1.32083	-5.96142
1.32958	-7.65896	1.33292	-7.49016	1.33103	-6.14309	1.3327	-2.14434	1.33083	-1.50967	1.3275	-5.96857
1.33625	-7.6623	1.33958	-7.49397	1.3377	-6.14738	1.33937	-2.1472	1.3375	-1.51396	1.33417	-5.97525
1.34292	-7.66706	1.34625	-7.49826	1.34437	-6.1512	1.34603	-2.14958	1.34417	-1.5192	1.34083	-5.9824
1.34958	-7.67136	1.35292	-7.50208	1.35103	-6.15501	1.3527	-2.15101	1.35083	-1.52445	1.3475	-5.98812
1.35625	-7.67565	1.35958	-7.50542	1.3577	-6.15931	1.35937	-2.15197	1.3575	-1.52969	1.35417	-5.99289
1.36292	-7.67899	1.36625	-7.50923	1.36437	-6.16217	1.36603	-2.1534	1.36417	-1.53494	1.36083	-5.99718
1.36958	-7.68232	1.37292	-7.51257	1.37103	-6.16407	1.3727	-2.15483	1.37083	-1.54066	1.3675	-6.00147
1.37625	-7.68566	1.37958	-7.51591	1.3777	-6.16646	1.37937	-2.15626	1.3775	-1.54591	1.37417	-6.00481
1.38292	-7.68805	1.38625	-7.51829	1.38437	-6.1698	1.38603	-2.15816	1.38417	-1.55067	1.38083	-6.00863
1.38958	-7.69043	1.39292	-7.52068	1.39103	-6.17361	1.3927	-2.16007	1.39083	-1.55497	1.3875	-6.01196
1.39625	-7.69281	1.39958	-7.52401	1.3977	-6.17743	1.39937	-2.16198	1.3975	-1.55973	1.39417	-6.01625
1.40292	-7.6952	1.40625	-7.52783	1.40437	-6.18124	1.40603	-2.16293	1.40417	-1.5645	1.40083	-6.02055
1.40958	-7.69711	1.41292	-7.53212	1.41103	-6.18553	1.4127	-2.16389	1.41083	-1.56879	1.4075	-6.02388
1.41625	-7.69854	1.41958	-7.53593	1.4177	-6.18935	1.41937	-2.16484	1.4175	-1.57261	1.41417	-6.0277
1.42292	-7.69997	1.42625	-7.53927	1.42437	-6.19125	1.42603	-2.16579	1.42417	-1.57547	1.42083	-6.03151
1.42958	-7.70092	1.43292	-7.54309	1.43103	-6.19268	1.4327	-2.16675	1.43083	-1.57881	1.4275	-6.0358
1.43625	-7.70235	1.43958	-7.5469	1.4377	-6.19364	1.43937	-2.1677	1.4375	-1.58167	1.43417	-6.03867
1.44292	-7.70426	1.44625	-7.55119	1.44437	-6.19459	1.44603	-2.16913	1.44417	-1.58453	1.44083	-6.04153
1.44958	-7.70664	1.45292	-7.55501	1.45103	-6.19602	1.4527	-2.17104	1.45083	-1.58739	1.4475	-6.04391
1.45625	-7.70998	1.45958	-7.55835	1.4577	-6.19841	1.45937	-2.17247	1.4575	-1.59073	1.45417	-6.04677
1.46292	-7.71332	1.46625	-7.56264	1.46437	-6.20174	1.46603	-2.17295	1.46417	-1.59454	1.46083	-6.04916
1.46958	-7.71761	1.47292	-7.56598	1.47103	-6.20556	1.4727	-2.17295	1.47083	-1.59836	1.4675	-6.05059
1.47625	-7.7219	1.47958	-7.56836	1.4777	-6.2108	1.47937	-2.17295	1.4775	-1.6017	1.47417	-6.05202
1.48292	-7.72619	1.48625	-7.57027	1.48437	-6.21557	1.48603	-2.17295	1.48417	-1.60503	1.48083	-6.05392
1.48958	-7.73001	1.49292	-7.57313	1.49103	-6.21891	1.4927	-2.17152	1.49083	-1.60837	1.4875	-6.05679
1.49625	-7.73382	1.49958	-7.57694	1.4977	-6.22177	1.49937	-2.17056	1.4975	-1.61171	1.49417	-6.05917
1.50292	-7.73668	1.50625	-7.58028	1.50437	-6.22416	1.50603	-2.17104	1.50417	-1.61552	1.50083	-6.06203
1.50958	-7.73859	1.51292	-7.58362	1.51103	-6.22654	1.5127	-2.17247	1.51083	-1.61934	1.5075	-6.06585
1.51625	-7.7405	1.51958	-7.58743	1.5177	-6.22892	1.51937	-2.17295	1.5175	-1.62363	1.51417	-6.07014
1.52292	-7.74193	1.52625	-7.59077	1.52437	-6.23131	1.52603	-2.1739	1.52417	-1.62697	1.52083	-6.07395
1.52958	-7.74336	1.53292	-7.59363	1.53103	-6.23369	1.5327	-2.17485	1.53083	-1.63031	1.5275	-6.07729
1.53625	-7.74574	1.53958	-7.59554	1.5377	-6.2356	1.53937	-2.17628	1.5375	-1.63317	1.53417	-6.0811
1.54292	-7.74813	1.54625	-7.59745	1.54437	-6.23703	1.54603	-2.17676	1.54417	-1.63555	1.54083	-6.08492
1.54958	-7.75051	1.55292	-7.59935	1.55103	-6.23798	1.5527	-2.17676	1.55083	-1.63698	1.5475	-6.08826
1.55625	-7.75337	1.55958	-7.60078	1.5577	-6.23941	1.55937	-2.17628	1.5575	-1.63841	1.55417	-6.09064
1.56292	-7.75576	1.56625	-7.60317	1.56437	-6.24132	1.56603	-2.17485	1.56417	-1.63984	1.56083	-6.09303
1.56958	-7.75862	1.57292	-7.60508	1.57103	-6.24371	1.5727	-2.17342	1.57083	-1.64127	1.5675	-6.09541
1.57625	-7.76052	1.57958	-7.60651	1.5777	-6.24704	1.57937	-2.17152	1.5775	-1.64318	1.57417	-6.09732
1.58292	-7.76148	1.58625	-7.60794	1.58437	-6.25134	1.58603	-2.16961	1.58417	-1.64557	1.58083	-6.09922
1.58958	-7.76243	1.59292	-7.60984	1.59103	-6.25563	1.5927	-2.16818	1.59083	-1.64843	1.5875	-6.10161
1.59625	-7.76386	1.59958	-7.61175	1.5977	-6.25944	1.59937	-2.16627	1.5975	-1.65129	1.59417	-6.10447
1.60292	-7.76434	1.60625	-7.61366	1.60437	-6.2623	1.60603	-2.16436	1.60417	-1.65415	1.60083	-6.10733
1.60958	-7.76482	1.61292	-7.61509	1.61103	-6.26469	1.6127	-2.16198	1.61083	-1.65606	1.6075	-6.10924
1.61625	-7.76529	1.61958	-7.617	1.6177	-6.26612	1.61937	-2.15912	1.6175	-1.65653	1.61417	-6.11019
1.62292	-7.76577	1.62625	-7.61843	1.62437	-6.26707	1.62603	-2.1553	1.62417	-1.65653	1.62083	-6.11019
1.62958	-7.76577	1.63292	-7.61986	1.63103	-6.26707	1.6327	-2.15101	1.63083	-1.65606	1.6275	-6.10971
1.63625	-7.76482	1.63958	-7.61986	1.6377	-6.26564	1.63937	-2.14624	1.6375	-1.6551	1.63417	-6.10876
1.64292	-7.76339	1.64625	-7.6189	1.64437	-6.26373	1.64603	-2.141	1.64417	-1.6551	1.64083	-6.10733
1.64958	-7.76148	1.65292	-7.617	1.65103	-6.26135	1.6527	-2.13575	1.65083	-1.65462	1.6475	-6.10638
1.65625	-7.75957	1.65958	-7.61414	1.6577	-6.25849	1.65937	-2.13146	1.6575	-1.65462	1.65417	-6.10638
1.66292	-7.75814	1.66625	-7.61032	1.66437	-6.25658	1.66603	-2.12717	1.66417	-1.65462	1.66083	-6.10638
1.66958	-7.75719	1.67292	-7.60651	1.67103	-6.25467	1.6727	-2.12288	1.67083	-1.65415	1.6675	-6.10733
1.67625	-7.75671	1.67958	-7.60269	1.6777	-6.25324	1.67937	-2.11859	1.6775	-1.65415	1.67417	-6.10733
1.68292	-7.75576	1.68625	-7.59935	1.68437	-6.25229	1.68603	-2.11525	1.68417	-1.65319	1.68083	-6.10685
1.68958	-7.7548	1.69292	-7.59745	1.69103	-6.25086	1.6927	-2.11287	1.69083	-1.65272	1.6875	-6.10685
1.69625	-7.75385	1.69958	-7.59602	1.6977	-6.2499	1.69937	-2.11048	1.6975	-1.65272	1.69417	-6.10638
1.70292	-7.75242	1.70625	-7.59554	1.70437	-6.24847	1.70603	-2.10762	1.70417	-1.65272	1.70083	-6.1059
1.70958	-7.75146	1.71292	-7.59649	1.71103	-6.24752	1.7127	-2.10524	1.71083	-1.65272	1.7075	-6.1059
1.71625	-7.75051	1.71958	-7.59745	1.7177	-6.24752	1.71937	-2.10238	1.7175	-1.65319	1.71417	-6.10638
1.72292	-7.75051	1.72625	-7.59888	1.72437	-6.24895	1.72603	-2.09951	1.72417	-1.65367	1.72083	-6.10733
1.72958	-7.75051	1.73292	-7.60031	1.73103	-6.25038	1.7327	-2.09665	1.73083	-1.65462	1.7275	-6.10876
1.73625	-7.75099	1.73958	-7.60174	1.7377	-6.25181	1.73937	-2.09332	1.7375	-1.65606	1.73417	-6.10971
1.74292	-7.75194	1.74625	-7.60269	1.74437	-6.25372	1.74603	-2.08998	1.74417	-1.65701	1.74083	-6.11067
1.74958	-7.75385	1.75292	-7.6046	1.75103	-6.2561	1.7527	-2.08712	1.75083	-1.65844	1.7475	-6.11115
1.75625	-7.75528	1.75958	-7.60603	1.7577	-6.25753	1.75937	-2.08521	1.7575	-1.65987	1.75417	-6.1121
1.76292	-7.75671	1.76625	-7.60841	1.76437	-6.25849	1.76603	-2.08378	1.76417	-1.66035	1.76083	-6.11353
1.76958	-7.75862	1.77292	-7.60984	1.77103	-6.25944	1.7727	-2.08282	1.77083	-1.66178	1.7675	-6.11639
1.77625	-7.76005	1.77958	-7.6108	1.7777	-6.2604	1.77937	-2.08092	1.7775	-1.66321	1.77417	-6.11925
1.78292	-7.761	1.78625	-7.61271	1.78437	-6.26135	1.78603	-2.07853	1.78417	-1.66464	1.78083	-6.12259
1.78958	-7.76196	1.79292	-7.61366	1.79103	-6.26183	1.7927	-2.07567	1.79083	-1.66655	1.7875	-6.12593
1.79625	-7.76243	1.79958	-7.61461	1.7977	-6.2623	1.79937	-2.07233	1.7975	-1.66845	1.79417	-6.12831
1.80292	-7.76339	1.80625	-7.61652	1.80437	-6.26278	1.80603	-2.06804	1.80417	-1.67036	1.80083	-6.13022
1.80958	-7.76386	1.81292	-7.6189	1.81103	-6.26278	1.8127	-2.06327	1.81083	-1.67179	1.8075	-6.13117
1.81625	-7.76434	1.81958	-7.62081	1.8177	-6.26183	1.81937	-2.05851	1.8175	-1.67131	1.81417	-6.13165
1.82292	-7.76434	1.82625	-7.62129	1.82437	-6.2604	1.82603	-2.05374	1.82417	-1.66988	1.82083	-6.13165
1.82958	-7.76434	1.83292	-7.62081	1.83103	-6.25849	1.8327	-2.04945	1.83083	-1.66798	1.8275	-6.13165
1.83625	-7.76291	1.83958	-7.62033	1.8377	-6.25658	1.83937	-2.0442	1.8375	-1.66559	1.83417	-6.13213
1.84292	-7.76052	1.84625	-7.61843	1.84437	-6.25467	1.84603	-2.03848	1.84417	-1.66273	1.84083	-6.13117
1.84958	-7.75671	1.85292	-7.61414	1.85103	-6.25229	1.8527	-2.03228	1.85083	-1.65892	1.8475	-6.12974
1.85625	-7.7529	1.85958	-7.60937	1.8577	-6.2499	1.85937	-2.02656	1.8575	-1.6551	1.85417	-6.12783
1.86292	-7.74813	1.86625	-7.60508	1.86437	-6.24704	1.86603	-2.02036	1.86417	-1.65129	1.86083	-6.12545
1.86958	-7.7424	1.87292	-7.60031	1.87103	-6.24466	1.8727	-2.01368	1.87083	-1.64795	1.8675	-6.12307
1.87625	-7.73668	1.87958	-7.59506	1.8777	-6.24132	1.87937	-2.00701	1.8775	-1.64604	1.87417	-6.1202
1.88292	-7.73144	1.88625	-7.59029	1.88437	-6.23798	1.88603	-2.00033	1.88417	-1.64461	1.88083	-6.11782
1.88958	-7.72715	1.89292	-7.58648	1.89103	-6.23512	1.8927	-1.99461	1.89083	-1.64413	1.8875	-6.11544
1.89625	-7.72285	1.89958	-7.58362	1.8977	-6.23322	1.89937	-1.98936	1.8975	-1.64461	1.89417	-6.11448
1.90292	-7.71856	1.90625	-7.58076	1.90437	-6.23274	1.90603	-1.9846	1.90417	-1.64509	1.90083	-6.11401
1.90958	-7.71523	1.91292	-7.57885	1.91103	-6.23322	1.9127	-1.98126	1.91083	-1.64604	1.9075	-6.11353
1.91625	-7.71332	1.91958	-7.57885	1.9177	-6.23369	1.91937	-1.9784	1.9175	-1.64652	1.91417	-6.11448
1.92292	-7.71189	1.92625	-7.58028	1.92437	-6.23512	1.92603	-1.97649	1.92417	-1.64747	1.92083	-6.11734
1.92958	-7.71189	1.93292	-7.58219	1.93103	-6.23703	1.9327	-1.97506	1.93083	-1.6489	1.9275	-6.12068
1.93625	-7.71332	1.93958	-7.58553	1.9377	-6.23941	1.93937	-1.97315	1.9375	-1.65033	1.93417	-6.1245
1.94292	-7.7157	1.94625	-7.58982	1.94437	-6.24228	1.94603	-1.97172	1.94417	-1.65176	1.94083	-6.12783
1.94958	-7.71904	1.95292	-7.59363	1.95103	-6.24466	1.9527	-1.96934	1.95083	-1.65319	1.9475	-6.13117
1.95625	-7.7219	1.95958	-7.59649	1.9577	-6.24704	1.95937	-1.966	1.9575	-1.65367	1.95417	-6.13403
1.96292	-7.72524	1.96625	-7.59935	1.96437	-6.24943	1.96603	-1.96123	1.96417	-1.65415	1.96083	-6.13642
1.96958	-7.72667	1.97292	-7.60174	1.97103	-6.25086	1.9727	-1.95408	1.97083	-1.6551	1.9675	-6.13737
1.97625	-7.72667	1.97958	-7.60365	1.9777	-6.24943	1.97937	-1.94359	1.9775	-1.6551	1.97417	-6.13689
1.98292	-7.72476	1.98625	-7.60221	1.98437	-6.24514	1.98603	-1.92738	1.98417	-1.65272	1.98083	-6.13546
1.98958	-7.71952	1.99292	-7.59697	1.99103	-6.2356	1.9927	-1.89638	1.99083	-1.64461	1.9875	-6.12974
1.99625	-7.70903	1.99958	-7.58505	1.9977	-6.21176	1.99937	-1.83344	1.9975	-1.62077	1.99417	-6.11353
2.00292	-7.68757	2.00625	-7.55739	2.00437	-6.15549	2.00603	-1.71566	2.00417	-1.56307	2.00083	-6.07252
2.00958	-7.63798	2.01292	-7.4954	2.01103	-6.04153	2.0127	-1.52016	2.01083	-1.44863	2.0075	-5.98431
2.01625	-7.53498	2.01958	-7.37143	2.0177	-5.84555	2.01937	-1.22404	2.0175	-1.25456	2.01417	-5.82361
2.02292	-7.34711	2.02625	-7.1578	2.02437	-5.55086	2.02603	-0.805378	2.02417	-0.96035	2.02083	-5.57041
2.02958	-7.04479	2.03292	-6.82878	2.03103	-5.14364	2.0327	-0.23222	2.03083	-0.543594	2.0275	-5.21135
2.03625	-6.59704	2.03958	-6.35862	2.0377	-4.61054	2.03937	0.548363	2.0375	0.0267029	2.03417	-4.73213
2.04292	-5.96714	2.04625	-5.71537	2.04437	-3.92866	2.04603	1.6098	2.04417	0.792503	2.04083	-4.11224
2.04958	-5.10311	2.05292	-4.85229	2.05103	-3.05557	2.0527	2.99501	2.05083	1.78862	2.0475	-3.3145
2.05625	-3.93009	2.05958	-3.70502	2.0577	-1.94931	2.05937	4.66633	2.0575	3.00026	2.05417	-2.30312
2.06292	-2.37894	2.06625	-2.23827	2.06437	-0.61655	2.06603	6.51646	2.06417	4.35162	2.06083	-1.09196
2.06958	-0.45681	2.07292	-0.496387	2.07103	0.861168	2.0727	8.44002	2.07083	5.73874	2.0675	0.236511
2.07625	1.73044	2.07958	1.40095	2.0777	2.37179	2.07937	10.3698	2.0775	7.07722	2.07417	1.56641
2.08292	4.03976	2.08625	3.33023	2.08437	3.83234	2.08603	12.2728	2.08417	8.32844	2.08083	2.81429
2.08958	6.37054	2.09292	5.20945	2.09103	5.20563	2.0927	14.1912	2.09083	9.53865	2.0875	3.94487
2.09625	8.65602	2.09958	6.98185	2.0977	6.50501	2.09937	16.3174	2.0975	10.8852	2.09417	4.97866
2.10292	10.8581	2.10625	8.63886	2.10437	7.85398	2.10603	18.9366	2.10417	12.6204	2.10083	6.0482
2.10958	13.0525	2.11292	10.2987	2.11103	9.51958	2.1127	22.2249	2.11083	14.9245	2.1075	7.43484
2.11625	15.5063	2.11958	12.2318	2.1177	11.8484	2.11937	26.1083	2.1175	17.8094	2.11417	9.45663
2.12292	18.569	2.12625	14.7223	2.12437	15.1114	2.12603	30.3268	2.12417	21.1463	2.12083	12.2623
2.12958	22.3947	2.13292	17.8661	2.13103	19.3729	2.1327	34.6022	2.13083	24.7269	2.1275	15.7299
2.13625	26.7959	2.13958	21.5049	2.1377	24.4741	2.13937	38.7068	2.1375	28.2874	2.13417	19.5785
2.14292	31.3911	2.14625	25.3644	2.14437	30.1132	2.14603	42.5024	2.14417	31.5843	2.14083	23.551
2.14958	35.8639	2.15292	29.2287	2.15103	35.9306	2.1527	45.9824	2.15083	34.5001	2.1475	27.4858
2.15625	40.0486	2.15958	32.9771	2.1577	41.5578	2.15937	49.2616	2.1575	37.0636	2.15417	31.2996
2.16292	43.8771	2.16625	36.5467	2.16437	46.6447	2.16603	52.4502	2.16417	39.361	2.16083	34.9755
2.16958	47.3943	2.17292	39.9404	2.17103	50.9162	2.1727	55.5158	2.17083	41.4329	2.1675	38.5385
2.17625	50.777	2.17958	43.221	2.1777	54.2107	2.17937	58.2533	2.1775	43.2439	2.17417	41.9641
2.18292	54.1892	2.18625	46.402	2.18437	56.457	2.18603	60.3738	2.18417	44.7083	2.18083	45.0873
2.18958	57.5662	2.19292	49.3217	2.19103	57.6296	2.1927	61.6164	2.19083	45.7239	2.1875	47.6227
2.19625	60.5736	2.19958	51.6601	2.1977	57.7354	2.19937	61.8539	2.1975	46.2098	2.19417	49.2911
2.20292	62.7947	2.20625	53.0925	2.20437	56.86	2.20603	61.1453	2.20417	46.1411	2.20083	49.9468
2.20958	63.9343	2.21292	53.4496	2.21103	55.1982	2.2127	59.6981	2.21083	45.5689	2.2075	49.6502
2.21625	63.9262	2.21958	52.7802	2.2177	53.0229	2.21937	57.7855	2.2175	44.6181	2.21417	48.6345
2.22292	62.9296	2.22625	51.312	2.22437	50.6268	2.22603	55.6664	2.22417	43.4699	2.22083	47.1978
2.22958	61.2421	2.23292	49.3493	2.23103	48.2864	2.2327	53.5603	2.23083	42.356	2.2275	45.5866
2.23625	59.1726	2.23958	47.1654	2.2377	46.278	2.23937	51.6515	2.2375	41.5492	2.23417	43.9501
2.24292	56.9477	2.24625	44.9452	2.24437	44.879	2.24603	50.1046	2.24417	41.2698	2.24083	42.3617
2.24958	54.6827	2.25292	42.7885	2.25103	44.2429	2.2527	49.026	2.25083	41.5273	2.2475	40.8735
2.25625	52.4149	2.25958	40.7429	2.2577	44.2529	2.25937	48.3928	2.2575	42.0732	2.25417	39.5555
2.26292	50.1571	2.26625	38.8532	2.26437	44.5399	2.26603	48.0347	2.26417	42.551	2.26083	38.4817
2.26958	47.955	2.27292	37.1838	2.27103	44.7068	2.2727	47.719	2.27083	42.6726	2.2675	37.6678
2.27625	45.9151	2.27958	35.8009	2.2777	44.5075	2.27937	47.255	2.2775	42.2621	2.27417	37.044
2.28292	44.1732	2.28625	34.7314	2.28437	43.8356	2.28603	46.526	2.28417	41.2583	2.28083	36.509
2.28958	42.8252	2.29292	33.9398	2.29103	42.7108	2.2927	45.4931	2.29083	39.7806	2.2875	35.985
2.29625	41.873	2.29958	33.3419	2.2977	41.337	2.29937	44.2309	2.2975	38.1341	2.29417	35.4061
2.30292	41.2388	2.30625	32.8283	2.30437	40.0701	2.30603	42.922	2.30417	36.664	2.30083	34.7133
2.30958	40.8225	2.31292	32.2871	2.31103	39.2079	2.3127	41.7638	2.31083	35.5706	2.3075	33.8974
2.31625	40.5273	2.31958	31.641	2.3177	38.8045	2.31937	40.8697	2.3175	34.8721	2.31417	33.0353
2.32292	40.2765	2.32625	30.8886	2.32437	38.7144	2.32603	40.2641	2.32417	34.4982	2.32083	32.2447
2.32958	40.0591	2.33292	30.107	2.33103	38.7726	2.3327	39.9828	2.33083	34.3938	2.3275	31.621
2.33625	39.9704	2.33958	29.4132	2.3377	38.9304	2.33937	40.2055	2.3375	34.5616	2.33417	31.229
2.34292	40.1721	2.34625	28.924	2.34437	39.2742	2.34603	41.8925	2.34417	35.1024	2.34083	31.1356
2.34958	40.812	2.35292	28.7452	2.35103	40.0143	2.3527	49.1452	2.35083	36.407	2.3475	31.4679
2.35625	42.0604	2.35958	28.986	2.3577	41.7166	2.35937	69.5705	2.3575	40.4105	2.35417	32.6643
2.36292	44.9629	2.36625	29.861	2.36437	47.0901	2.36603	107.783	2.36417	52.4302	2.36083	37.1065
2.36958	54.2598	2.37292	32.618	2.37103	63.3774	2.3727	159.458	2.37083	78.0253	2.3675	51.4965
2.37625	78.0606	2.37958	41.9126	2.3777	97.4073	2.37937	213.624	2.3775	116.964	2.37417	82.819
2.38292	120.193	2.38625	64.3969	2.38437	147.463	2.38603	260.984	2.38417	162.009	2.38083	130.929
2.38958	174.887	2.39292	101.824	2.39103	202.697	2.3927	296.241	2.39083	204.504	2.3875	187.482
2.39625	230.708	2.39958	147.756	2.3977	251.744	2.39937	314.559	2.3975	239.301	2.39417	242.799
2.40292	279.409	2.40625	192.266	2.40437	289.035	2.40603	313.604	2.40417	262.172	2.40083	290.464
2.40958	315.554	2.41292	229.199	2.41103	310.112	2.4127	297.428	2.41083	269.362	2.4075	322.852
2.41625	332.15	2.41958	254.628	2.4177	310.856	2.41937	274.85	2.4175	261.56	2.41417	331.937
2.42292	325.42	2.42625	263.66	2.42437	293.034	2.42603	252.618	2.42417	245.028	2.42083	316.932
2.42958	300.794	2.43292	254.692	2.43103	265.725	2.4327	231.88	2.43083	226.827	2.4275	286.465
2.43625	270.162	2.43958	233.207	2.4377	238.614	2.43937	210.912	2.4375	209.598	2.43417	251.333
2.44292	242.117	2.44625	208.493	2.44437	214.921	2.44603	188.674	2.44417	192.497	2.44083	217.371
2.44958	218.672	2.45292	185.999	2.45103	193.124	2.4527	166.395	2.45083	174.386	2.4475	186.917
2.45625	199.411	2.45958	166.011	2.4577	171.727	2.45937	146.719	2.4575	155.423	2.45417	161.901
2.46292	184.437	2.46625	147.735	2.46437	151.368	2.46603	131.629	2.46417	136.966	2.46083	143.7
2.46958	174.012	2.47292	131.744	2.47103	133.951	2.4727	121.356	2.47083	120.591	2.4675	132.058
2.47625	167.456	2.47958	119.393	2.4777	120.687	2.47937	114.904	2.4775	107.197	2.47417	125.285
2.48292	163.191	2.48625	111.255	2.48437	111.248	2.48603	111.006	2.48417	96.8208	2.48083	121.315
2.48958	159.612	2.49292	106.678	2.49103	104.419	2.4927	108.578	2.49083	88.9907	2.4875	118.528
2.49625	155.731	2.49958	104.47	2.4977	98.9804	2.49937	106.816	2.4975	83.1327	2.49417	115.957
2.50292	151.182	2.50625	103.544	2.50437	94.1539	2.50603	105.185	2.50417	78.7396	2.50083	113.116
2.50958	145.874	2.51292	103.086	2.51103	89.6287	2.5127	103.434	2.51083	75.3813	2.5075	109.829
2.51625	139.816	2.51958	102.528	2.5177	85.4025	2.51937	101.59	2.5175	72.6938	2.51417	106.163
2.52292	133.223	2.52625	101.552	2.52437	81.5792	2.52603	99.9103	2.52417	70.3793	2.52083	102.317
2.52958	126.55	2.53292	100.092	2.53103	78.2452	2.5327	98.7887	2.53083	68.2282	2.5275	98.4569
2.53625	120.361	2.53958	98.2227	2.5377	75.4528	2.53937	98.597	2.5375	66.1402	2.53417	94.6217
2.54292	115.137	2.54625	96.0517	2.54437	73.2441	2.54603	99.5173	2.54417	64.1079	2.54083	90.7855
2.54958	111.13	2.55292	93.7176	2.55103	71.6228	2.5527	101.433	2.55083	62.1576	2.5475	86.9331
2.55625	108.307	2.55958	91.4583	2.5577	70.5042	2.55937	103.929	2.5575	60.2965	2.55417	83.0579
2.56292	106.39	2.56625	89.6258	2.56437	69.7002	2.56603	106.366	2.56417	58.5017	2.56083	79.1149
2.56958	104.979	2.57292	88.5592	2.57103	68.9626	2.5727	108.027	2.57083	56.7408	2.5675	75.0074
2.57625	103.674	2.57958	88.3875	2.5777	68.0537	2.57937	108.295	2.5775	54.9889	2.57417	70.6253
2.58292	102.183	2.58625	88.9273	2.58437	66.7987	2.58603	106.808	2.58417	53.2231	2.58083	65.9127
2.58958	100.394	2.59292	89.767	2.59103	65.1016	2.5927	103.539	2.59083	51.414	2.5875	60.9136
2.59625	98.3596	2.59958	90.4341	2.5977	62.9401	2.59937	98.7554	2.5975	49.5291	2.59417	55.7723
2.60292	96.1814	2.60625	90.4775	2.60437	60.3595	2.60603	92.885	2.60417	47.5497	2.60083	50.6935
2.60958	93.8644	2.61292	89.469	2.61103	57.467	2.6127	86.4019	2.61083	45.4941	2.6075	45.8927
2.61625	91.28	2.61958	87.0624	2.6177	54.4081	2.61937	79.7682	2.6175	43.4175	2.61417	41.5545
2.62292	88.2301	2.62625	83.1428	2.62437	51.3248	2.62603	73.4019	2.62417	41.4038	2.62083	37.8051
2.62958	84.559	2.63292	77.9004	2.63103	48.3241	2.6327	67.6246	2.63083	39.5455	2.6275	34.6918
2.63625	80.2312	2.63958	71.7258	2.6377	45.4741	2.63937	62.6135	2.6375	37.9162	2.63417	32.1908
2.64292	75.3622	2.64625	65.0592	2.64437	42.8176	2.64603	58.4078	2.64417	36.5472	2.64083	30.2281
2.64958	70.1761	2.65292	58.3444	2.65103	40.3814	2.6527	54.9674	2.65083	35.4204	2.6475	28.7127
2.65625	64.9333	2.65958	52.0296	2.6577	38.1799	2.65937	52.2199	2.6575	34.4787	2.65417	27.5593
2.66292	59.865	2.66625	46.494	2.66437	36.2167	2.66603	50.0808	2.66417	33.6456	2.66083	26.6929
2.66958	55.1467	2.67292	41.9335	2.67103	34.4954	2.6727	48.461	2.67083	32.8479	2.6675	26.0453
2.67625	50.8933	2.67958	38.3277	2.6777	33.0143	2.67937	47.2708	2.6775	32.0311	2.67417	25.5499
2.68292	47.1559	2.68625	35.5153	2.68437	31.7631	2.68603	46.4177	2.68417	31.1613	2.68083	25.1393
2.68958	43.9239	2.69292	33.299	2.69103	30.7145	2.6927	45.805	2.69083	30.2296	2.6875	24.7545
2.69625	41.1382	2.69958	31.5037	2.6977	29.8305	2.69937	45.3277	2.6975	29.2439	2.69417	24.3459
2.70292	38.7206	2.70625	29.9997	2.70437	29.0718	2.70603	44.8809	2.70417	28.2254	2.70083	23.8833
2.70958	36.6006	2.71292	28.7008	2.71103	28.4085	2.7127	44.3664	2.71083	27.2064	2.7075	23.3574
2.71625	34.7257	2.71958	27.555	2.7177	27.8301	2.71937	43.705	2.7175	26.2232	2.71417	22.7847
2.72292	33.0567	2.72625	26.5331	2.72437	27.3404	2.72603	42.8462	2.72417	25.3096	2.72083	22.1968
2.72958	31.5647	2.73292	25.6152	2.73103	26.948	2.7327	41.7733	2.73083	24.4904	2.7275	21.6331
2.73625	30.2305	2.73958	24.786	2.7377	26.6533	2.73937	40.503	2.7375	23.778	2.73417	21.1291
2.74292	29.0432	2.74625	24.0273	2.74437	26.4392	2.74603	39.0811	2.74417	23.169	2.74083	20.709
2.74958	27.9922	2.75292	23.3192	2.75103	26.2685	2.7527	37.5719	2.75083	22.6479	2.7475	20.3738
2.75625	27.0643	2.75958	22.6402	2.7577	26.0887	2.75937	36.0379	2.7575	22.1953	2.75417	20.1015
2.76292	26.2375	2.76625	21.975	2.76437	25.846	2.76603	34.5325	2.76417	21.7929	2.76083	19.8517
2.76958	25.4903	2.77292	21.3184	2.77103	25.5008	2.7727	33.092	2.77083	21.4238	2.7675	19.5789
2.77625	24.8079	2.77958	20.6718	2.7777	25.0335	2.77937	31.734	2.7775	21.0781	2.77417	19.2432
2.78292	24.1885	2.78625	20.041	2.78437	24.4493	2.78603	30.4642	2.78417	20.752	2.78083	18.8217
2.78958	23.6411	2.79292	19.4321	2.79103	23.7732	2.7927	29.2788	2.79083	20.442	2.7875	18.3177
2.79625	23.181	2.79958	18.847	2.7977	23.0398	2.79937	28.1711	2.7975	20.1459	2.79417	17.7546
2.80292	22.8229	2.80625	18.2848	2.80437	22.2821	2.80603	27.1363	2.80417	19.8593	2.80083	17.1671
2.80958	22.5706	2.81292	17.7374	2.81103	21.5249	2.8127	26.1745	2.81083	19.5742	2.8075	16.5906
2.81625	22.4109	2.81958	17.1947	2.8177	20.782	2.81937	25.2872	2.8175	19.2838	2.81417	16.0475
2.82292	22.3131	2.82625	16.6507	2.82437	20.0615	2.82603	24.4751	2.82417	18.9791	2.82083	15.5435
2.82958	22.233	2.83292	16.1033	2.83103	19.3672	2.8327	23.7355	2.83083	18.6524	2.8275	15.0666
2.83625	22.1219	2.83958	15.5573	2.8377	18.6992	2.83937	23.0646	2.8375	18.2996	2.83417	14.5984
2.84292	21.9378	2.84625	15.0208	2.84437	18.0583	2.84603	22.4571	2.84417	17.9176	2.84083	14.1239
2.84958	21.6503	2.85292	14.5054	2.85103	17.4451	2.8527	21.9092	2.85083	17.5095	2.8475	13.6337
2.85625	21.2436	2.85958	14.0224	2.8577	16.8586	2.85937	21.4157	2.8575	17.0803	2.85417	13.1307
2.86292	20.7195	2.86625	13.5798	2.86437	16.294	2.86603	20.9756	2.86417	16.6378	2.86083	12.6228
2.86958	20.0939	2.87292	13.1841	2.87103	15.7461	2.8727	20.5989	2.87083	16.192	2.8675	12.1245
2.87625	19.3944	2.87958	12.8388	2.8777	15.2121	2.87937	20.3133	2.8775	15.7518	2.87417	11.6544
2.88292	18.6629	2.88625	12.5465	2.88437	14.6904	2.88603	20.1559	2.88417	15.327	2.88083	11.2348
2.88958	17.9539	2.89292	12.3072	2.89103	14.1854	2.8927	20.1507	2.89083	14.9269	2.8875	10.8986
2.89625	17.3321	2.89958	12.116	2.8977	13.7076	2.89937	20.2866	2.8975	14.5645	2.89417	10.6864
2.90292	16.85	2.90625	11.9619	2.90437	13.2818	2.90603	20.5173	2.90417	14.2598	2.90083	10.6392
2.90958	16.5329	2.91292	11.8332	2.91103	12.9442	2.9127	20.7672	2.91083	14.0367	2.9075	10.7832
2.91625	16.3584	2.91958	11.7245	2.9177	12.7392	2.91937	20.9436	2.9175	13.916	2.91417	11.1156
2.92292	16.2621	2.92625	11.6453	2.92437	12.7058	2.92603	20.9622	2.92417	13.9027	2.92083	11.5871
2.92958	16.1533	2.93292	11.622	2.93103	12.8579	2.9327	20.7763	2.93083	13.9771	2.9275	12.1126
2.93625	15.9421	2.93958	11.683	2.9377	13.1736	2.93937	20.3958	2.9375	14.0953	2.93417	12.5966
2.94292	15.5673	2.94625	11.8341	2.94437	13.6032	2.94603	19.8736	2.94417	14.2007	2.94083	12.9757
2.94958	15.0132	2.95292	12.0411	2.95103	14.1029	2.9527	19.2823	2.95083	14.2369	2.9475	13.2289
2.95625	14.3118	2.95958	12.2428	2.9577	14.6713	2.95937	18.6906	2.9575	14.1644	2.95417	13.3648
2.96292	13.5264	2.96625	12.3758	2.96437	15.3594	2.96603	18.1441	2.96417	13.9675	2.96083	13.4048
2.96958	12.7287	2.97292	12.3863	2.97103	16.243	2.9727	17.6625	2.97083	13.6652	2.9675	13.3762
2.97625	11.9729	2.97958	12.2452	2.9777	17.3612	2.97937	17.2443	2.9775	13.2985	2.97417	13.3028
2.98292	11.2872	2.98625	11.9576	2.98437	18.6672	2.98603	16.8791	2.98417	12.9185	2.98083	13.1979
2.98958	10.6807	2.99292	11.5681	2.99103	20.0229	2.9927	16.5558	2.99083	12.569	2.9875	13.062
2.99625	10.15	2.99958	11.1384	2.9977	21.2412	2.99937	16.2721	2.9975	12.2814	2.99417	12.9075
3.00292	9.69362	3.00625	10.7193	3.00437	22.141	3.00603	16.0317	3.00417	12.0721	3.00083	12.7726
3.00958	9.31168	3.01292	10.3359	3.01103	22.6045	3.0127	15.8443	3.01083	11.9429	3.0075	12.7106
3.01625	9.00745	3.01958	9.99308	3.0177	22.6231	3.01937	15.7223	3.0175	11.8818	3.01417	12.764
3.02292	8.78191	3.02625	9.68981	3.02437	22.3069	3.02603	15.676	3.02417	11.8666	3.02083	12.9466
3.02958	8.63075	3.03292	9.42993	3.03103	21.8344	3.0327	15.7104	3.03083	11.8699	3.0275	13.2437
3.03625	8.54445	3.03958	9.2206	3.0377	21.3728	3.03937	15.8215	3.0375	11.8632	3.03417	13.6232
3.04292	8.5063	3.04625	9.07326	3.04437	21.0223	3.04603	15.9974	3.04417	11.8251	3.04083	14.0519
3.04958	8.49581	3.05292	8.99172	3.05103	20.8097	3.0527	16.2215	3.05083	11.7488	3.0475	14.5044
3.05625	8.48818	3.05958	8.97503	3.0577	20.7129	3.05937	16.4733	3.0575	11.6439	3.05417	14.9722
3.06292	8.46243	3.06625	9.0127	3.06437	20.6966	3.06603	16.7341	3.06417	11.5371	3.06083	15.4691
3.06958	8.40569	3.07292	9.08613	3.07103	20.7343	3.0727	16.994	3.07083	11.4713	3.0675	16.0298
3.07625	8.31318	3.07958	9.16767	3.0777	20.8154	3.07937	17.2725	3.0775	11.5023	3.07417	16.7146
3.08292	8.1892	3.08625	9.22871	3.08437	20.9489	3.08603	17.9214	3.08417	11.693	3.08083	17.7121
3.08958	8.0471	3.09292	9.24253	3.09103	21.1682	3.0927	21.0075	3.09083	12.1346	3.0875	20.0381
3.09625	7.91073	3.09958	9.19199	3.0977	21.5597	3.09937	32.2337	3.0975	13.0982	3.09417	26.8989
3.10292	7.81631	3.10625	9.07087	3.10437	22.6207	3.10603	59.3376	3.10417	15.337	3.10083	43.4999
3.10958	7.82204	3.11292	8.883	3.11103	26.3252	3.1127	105.338	3.11083	19.9022	3.1075	74.0042
3.11625	7.9999	3.11958	8.64172	3.1177	36.3622	3.11937	163.445	3.1175	27.2017	3.11417	118.543
3.12292	8.41045	3.12625	8.3642	3.12437	55.3284	3.12603	220.396	3.12417	36.3269	3.12083	173.001
3.12958	9.07278	3.13292	8.07476	3.13103	81.2821	3.1327	264.21	3.13083	45.5174	3.1275	230.334
3.13625	9.95445	3.13958	7.80964	3.1377	108.276	3.13937	287.22	3.1375	53.1979	3.13417	280.937
3.14292	10.9844	3.14625	7.62224	3.14437	130.591	3.14603	285.368	3.14417	58.2023	3.14083	314.207
3.14958	12.0692	3.15292	7.56741	3.15103	144.884	3.1527	260.481	3.15083	59.5989	3.1475	323.162
3.15625	13.1021	3.15958	7.6766	3.1577	148.776	3.15937	222.677	3.1575	57.1771	3.15417	307.86
3.16292	13.9813	3.16625	7.95269	3.16437	141.088	3.16603	186.126	3.16417	51.9443	3.16083	274.289
3.16958	14.6356	3.17292	8.38852	3.17103	124.321	3.1727	160.44	3.17083	45.6777	3.1675	230.813
3.17625	15.0323	3.17958	8.97789	3.1777	104.448	3.17937	146.626	3.1775	39.7859	3.17417	185.624
3.18292	15.1682	3.18625	9.7003	3.18437	86.8058	3.18603	140.146	3.18417	34.7919	3.18083	145.262
3.18958	15.059	3.19292	10.5038	3.19103	72.999	3.1927	135.709	3.19083	30.6668	3.1875	113.213
3.19625	14.7352	3.19958	11.3168	3.1977	61.9898	3.19937	129.894	3.1975	27.2684	3.19417	89.6869
3.20292	14.2431	3.20625	12.0673	3.20437	52.5956	3.20603	121.574	3.20417	24.5085	3.20083	72.9465
3.20958	13.6385	3.21292	12.6853	3.21103	44.4317	3.2127	111.247	3.21083	22.3274	3.2075	60.8916
3.21625	12.9757	3.21958	13.0997	3.2177	37.5414	3.21937	100.06	3.2175	20.6447	3.21417	51.8923
3.22292	12.2991	3.22625	13.2523	3.22437	31.9304	3.22603	89.0527	3.22417	19.3548	3.22083	44.9224
3.22958	11.6363	3.23292	13.1259	3.23103	27.4501	3.2327	78.8546	3.23083	18.3544	3.2275	39.3829
3.23625	10.9978	3.23958	12.7516	3.2377	23.8833	3.23937	69.7279	3.2375	17.5571	3.23417	34.905
3.24292	10.3793	3.24625	12.1927	3.24437	21.029	3.24603	61.7247	3.24417	16.8967	3.24083	31.239
3.24958	9.77325	3.25292	11.5194	3.25103	18.7297	3.2527	54.8158	3.25083	16.326	3.2475	28.2063
3.25625	9.17721	3.25958	10.7894	3.2577	16.8686	3.25937	48.9435	3.2575	15.8095	3.25417	25.6753
3.26292	8.59165	3.26625	10.0427	3.26437	15.3584	3.26603	44.0307	3.26417	15.3236	3.26083	23.5415
3.26958	8.02088	3.27292	9.30262	3.27103	14.1315	3.2727	39.969	3.27083	14.8554	3.2675	21.7199
3.27625	7.47061	3.27958	8.58164	3.2777	13.1302	3.27937	36.6302	3.2775	14.401	3.27417	20.1411
3.28292	6.94656	3.28625	7.88975	3.28437	12.2991	3.28603	33.8793	3.28417	13.9627	3.28083	18.7502
3.28958	6.45638	3.29292	7.23553	3.29103	11.5862	3.2927	31.5957	3.29083	13.5431	3.2875	17.5066
3.29625	6.00576	3.29958	6.62756	3.2977	10.952	3.29937	29.6807	3.2975	13.1421	3.29417	16.386
3.30292	5.59902	3.30625	6.06918	3.30437	10.3688	3.30603	28.0581	3.30417	12.7568	3.30083	15.3766
3.30958	5.23663	3.31292	5.56183	3.31103	9.82189	3.3127	26.669	3.31083	12.383	3.3075	14.4734
3.31625	4.91095	3.31958	5.10693	3.3177	9.30643	3.31937	25.4641	3.3175	12.0173	3.31417	13.6762
3.32292	4.61531	3.32625	4.70209	3.32437	8.82578	3.32603	24.404	3.32417	11.6563	3.32083	12.9843
3.32958	4.34351	3.33292	4.34065	3.33103	8.38566	3.3327	23.4618	3.33083	11.3025	3.3275	12.3949
3.33625	4.09269	3.33958	4.01211	3.3377	7.98988	3.33937	22.6207	3.3375	10.962	3.33417	11.9009
3.34292	3.86047	3.34625	3.70932	3.34437	7.63607	3.34603	21.8716	3.34417	10.6416	3.34083	11.4946
3.34958	3.64637	3.35292	3.42941	3.35103	7.31993	3.3527	21.2088	3.35083	10.3455	3.3475	11.167
3.35625	3.44896	3.35958	3.17049	3.3577	7.04145	3.35937	20.6299	3.3575	10.078	3.35417	10.9091
3.36292	3.26872	3.36625	2.93255	3.36437	6.80113	3.36603	20.1316	3.36417	9.84049	3.36083	10.7141
3.36958	3.10516	3.37292	2.71416	3.37103	6.60038	3.3727	19.7048	3.37083	9.63593	3.3675	10.5743
3.37625	2.95687	3.37958	2.51532	3.3777	6.43873	3.37937	19.3381	3.3775	9.46379	3.37417	10.4823
3.38292	2.8224	3.38625	2.33555	3.38437	6.31618	3.38603	19.021	3.38417	9.32455	3.38083	10.4332
3.38958	2.69985	3.39292	2.17438	3.39103	6.23083	3.3927	18.7421	3.39083	9.21822	3.3875	10.4227
3.39625	2.58732	3.39958	2.03037	3.3977	6.17933	3.39937	18.4903	3.3975	9.14383	3.39417	10.4489
3.40292	2.48146	3.40625	1.9021	3.40437	6.15692	3.40603	18.259	3.40417	9.10139	3.40083	10.5066
3.40958	2.38132	3.41292	1.78814	3.41103	6.15883	3.4127	18.0426	3.41083	9.08899	3.4075	10.5906
3.41625	2.28596	3.41958	1.68562	3.4177	6.17981	3.41937	17.8394	3.4175	9.10473	3.41417	10.6931
3.42292	2.19536	3.42625	1.59264	3.42437	6.21271	3.42603	17.6482	3.42417	9.14669	3.42083	10.8047
3.42958	2.10905	3.43292	1.50633	3.43103	6.25038	3.4327	17.4665	3.43083	9.21154	3.4275	10.9138
3.43625	2.02751	3.43958	1.42622	3.4377	6.28328	3.43937	17.2939	3.4375	9.29356	3.43417	11.0078
3.44292	1.95122	3.44625	1.34945	3.44437	6.30188	3.44603	17.1275	3.44417	9.38082	3.44083	11.075
3.44958	1.8816	3.45292	1.27554	3.45103	6.2933	3.4527	16.9663	3.45083	9.46045	3.4475	11.1089
3.45625	1.81961	3.45958	1.20258	3.4577	6.24847	3.45937	16.8085	3.4575	9.51862	3.45417	11.1065
3.46292	1.76573	3.46625	1.13153	3.46437	6.16121	3.46603	16.6521	3.46417	9.54247	3.46083	11.0703
3.46958	1.72091	3.47292	1.06144	3.47103	6.03247	3.4727	16.4967	3.47083	9.52339	3.4675	11.0049
3.47625	1.68467	3.47958	0.992775	3.4777	5.86891	3.47937	16.3436	3.4775	9.46093	3.47417	10.9196
3.48292	1.65701	3.48625	0.926018	3.48437	5.68151	3.48603	16.1939	3.48417	9.35936	3.48083	10.8237
3.48958	1.63412	3.49292	0.861645	3.49103	5.48506	3.4927	16.0484	3.49083	9.22728	3.4875	10.7265
3.49625	1.61219	3.49958	0.80204	3.4977	5.29337	3.49937	15.9073	3.4975	9.07421	3.49417	10.6335
3.50292	1.58834	3.50625	0.747681	3.50437	5.11456	3.50603	15.7719	3.50417	8.90493	3.50083	10.5491
3.50958	1.56069	3.51292	0.699997	3.51103	4.95052	3.5127	15.6441	3.51083	8.72231	3.5075	10.4766
3.51625	1.52779	3.51958	0.659943	3.5177	4.79841	3.51937	15.5244	3.5175	8.52489	3.51417	10.4175
3.52292	1.48869	3.52625	0.627995	3.52437	4.65345	3.52603	15.4128	3.52417	8.31223	3.52083	10.3717
3.52958	1.44339	3.53292	0.605583	3.53103	4.50945	3.5327	15.3108	3.53083	8.08477	3.5275	10.3383
3.53625	1.39332	3.53958	0.592709	3.5377	4.36354	3.53937	15.2211	3.5375	7.84874	3.53417	10.3173
3.54292	1.33801	3.54625	0.586987	3.54437	4.21572	3.54603	15.1453	3.54417	7.61175	3.54083	10.3097
3.54958	1.27888	3.55292	0.58794	3.55103	4.06885	3.5527	15.0838	3.55083	7.38573	3.5475	10.314
3.55625	1.21593	3.55958	0.594139	3.5577	3.92723	3.55937	15.0361	3.5575	7.18021	3.55417	10.3288
3.56292	1.14965	3.56625	0.604153	3.56437	3.79658	3.56603	15.0027	3.56417	7.00283	3.56083	10.3517
3.56958	1.07908	3.57292	0.615597	3.57103	3.68071	3.5727	14.9813	3.57083	6.85644	3.5675	10.3798
3.57625	1.00422	3.57958	0.626564	3.5777	3.58009	3.57937	14.9693	3.5775	6.74105	3.57417	10.4098
3.58292	0.924587	3.58625	0.636101	3.58437	3.49331	3.58603	14.9646	3.58417	6.65188	3.58083	10.4361
3.58958	0.841141	3.59292	0.643253	3.59103	3.41988	3.5927	14.9646	3.59083	6.58321	3.5875	10.4542
3.59625	0.754356	3.59958	0.647068	3.5977	3.3555	3.59937	14.9693	3.5975	6.52885	3.59417	10.4609
3.60292	0.666142	3.60625	0.646114	3.60437	3.29733	3.60603	14.9779	3.60417	6.4826	3.60083	10.4527
3.60958	0.577927	3.61292	0.638962	3.61103	3.24106	3.6127	14.9913	3.61083	6.43921	3.6075	10.4284
3.61625	0.492573	3.61958	0.62561	3.6177	3.1848	3.61937	15.0094	3.6175	6.39439	3.61417	10.3889
3.62292	0.412941	3.62625	0.60606	3.62437	3.1271	3.62603	15.0347	3.62417	6.34766	3.62083	10.3354
3.62958	0.339031	3.63292	0.581741	3.63103	3.06511	3.6327	15.0652	3.63083	6.29854	3.6275	10.2739
3.63625	0.270367	3.63958	0.553131	3.6377	2.9974	3.63937	15.1014	3.6375	6.24752	3.63417	10.2115
3.64292	0.208378	3.64625	0.521183	3.64437	2.92444	3.64603	15.1405	3.64417	6.1965	3.64083	10.1557
3.64958	0.154495	3.65292	0.487804	3.65103	2.84719	3.6527	15.1811	3.65083	6.14691	3.6475	10.1151
3.65625	0.109196	3.65958	0.454426	3.6577	2.76566	3.65937	15.2187	3.6575	6.0997	3.65417	10.0942
3.66292	0.0734329	3.66625	0.422955	3.66437	2.68269	3.66603	15.2502	3.66417	6.05583	3.66083	10.0951
3.66958	0.0481606	3.67292	0.393391	3.67103	2.60019	3.6727	15.2717	3.67083	6.01673	3.6675	10.1161
3.67625	0.0367165	3.67958	0.36478	3.6777	2.52008	3.67937	15.2817	3.6775	5.98431	3.67417	10.1519
3.68292	0.0414848	3.68625	0.337124	3.68437	2.44522	3.68603	15.2774	3.68417	5.95999	3.68083	10.1957
3.68958	0.0638962	3.69292	0.310421	3.69103	2.37799	3.6927	15.2569	3.69083	5.94616	3.6875	10.2401
3.69625	0.105858	3.69958	0.283241	3.6977	2.32172	3.69937	15.2211	3.6975	5.94473	3.69417	10.2787
3.70292	0.170708	3.70625	0.255108	3.70437	2.27928	3.70603	15.1725	3.70417	5.95617	3.70083	10.3083
3.70958	0.259399	3.71292	0.225544	3.71103	2.25353	3.7127	15.1143	3.71083	5.98097	3.7075	10.3269
3.71625	0.37384	3.71958	0.19598	3.7177	2.24495	3.71937	15.049	3.7175	6.01625	3.71417	10.3335
3.72292	0.513077	3.72625	0.166893	3.72437	2.25353	3.72603	14.9803	3.72417	6.05917	3.72083	10.3278
3.72958	0.674248	3.73292	0.139713	3.73103	2.27737	3.7327	14.9121	3.73083	6.1059	3.7275	10.3102
3.73625	0.853062	3.73958	0.117779	3.7377	2.31457	3.73937	14.8492	3.7375	6.15025	3.73417	10.2806
3.74292	1.04141	3.74625	0.103474	3.74437	2.3613	3.74603	14.7953	3.74417	6.18696	3.74083	10.2372
3.74958	1.22976	3.75292	0.100136	3.75103	2.41232	3.7527	14.7533	3.75083	6.21033	3.7475	10.179
3.75625	1.40572	3.75958	0.11301	3.7577	2.46143	3.75937	14.7266	3.7575	6.21748	3.75417	10.107
3.76292	1.55687	3.76625	0.145435	3.76437	2.50578	3.76603	14.7195	3.76417	6.20413	3.76083	10.0217
3.76958	1.67179	3.77292	0.200272	3.77103	2.54059	3.7727	14.7347	3.77083	6.16884	3.7675	9.92346
3.77625	1.74284	3.77958	0.277519	3.7777	2.56205	3.77937	14.7777	3.7775	6.1121	3.77417	9.81379
3.78292	1.76573	3.78625	0.374317	3.78437	2.56538	3.78603	14.8497	3.78417	6.0358	3.78083	9.6941
3.78958	1.74046	3.79292	0.488281	3.79103	2.54965	3.7927	14.9536	3.79083	5.94378	3.7875	9.56774
3.79625	1.67084	3.79958	0.611305	3.7977	2.51484	3.79937	15.0905	3.7975	5.83935	3.79417	9.43613
3.80292	1.56403	3.80625	0.734329	3.80437	2.46143	3.80603	15.2602	3.80417	5.72824	3.80083	9.29976
3.80958	1.42956	3.81292	0.84734	3.81103	2.39086	3.8127	15.4605	3.81083	5.61571	3.8075	9.16243
3.81625	1.27602	3.81958	0.941277	3.8177	2.30598	3.81937	15.6875	3.8175	5.50604	3.81417	9.02605
3.82292	1.11341	3.82625	1.00803	3.82437	2.21014	3.82603	15.9354	3.82417	5.40161	3.82083	8.89254
3.82958	0.950336	3.83292	1.04046	3.83103	2.10762	3.8327	16.1986	3.83083	5.30577	3.8275	8.76474
3.83625	0.792503	3.83958	1.03521	3.8377	2.00033	3.83937	16.47	3.8375	5.21994	3.83417	8.64506
3.84292	0.644207	3.84625	0.994205	3.84437	1.89304	3.84603	16.7451	3.84417	5.1446	3.84083	8.53634
3.84958	0.510216	3.85292	0.920296	3.85103	1.78862	3.8527	17.0207	3.85083	5.08022	3.8475	8.44097
3.85625	0.392437	3.85958	0.820637	3.8577	1.68943	3.85937	17.2973	3.8575	5.02586	3.85417	8.36086
3.86292	0.290394	3.86625	0.702381	3.86437	1.59883	3.86603	17.58	3.86417	4.98056	3.86083	8.2984
3.86958	0.20504	3.87292	0.574112	3.87103	1.51682	3.8727	17.8761	3.87083	4.94194	3.8675	8.25548
3.87625	0.134945	3.87958	0.442982	3.8777	1.44577	3.87937	18.1956	3.8775	4.90761	3.87417	8.23116
3.88292	0.082016	3.88625	0.313759	3.88437	1.38664	3.88603	18.5513	3.88417	4.87471	3.88083	8.22544
3.88958	0.0448227	3.89292	0.191212	3.89103	1.33896	3.8927	18.9562	3.89083	4.84037	3.8875	8.23689
3.89625	0.0209808	3.89958	0.079155	3.8977	1.30129	3.89937	19.4216	3.8975	4.80223	3.89417	8.26454
3.90292	0.00858307	3.90625	-0.0214577	3.90437	1.27077	3.90603	19.959	3.90417	4.75836	3.90083	8.3065
3.90958	0.00476837	3.91292	-0.109196	3.91103	1.24598	3.9127	20.5774	3.91083	4.70781	3.9075	8.36182
3.91625	0.00572205	3.91958	-0.182152	3.9177	1.22499	3.91937	21.2851	3.9175	4.65202	3.91417	8.43048
3.92292	0.00762939	3.92625	-0.240326	3.92437	1.20544	3.92603	22.0857	3.92417	4.59099	3.92083	8.51536
3.92958	0.00762939	3.93292	-0.284672	3.93103	1.18494	3.9327	22.9797	3.93083	4.52757	3.9275	8.61692
3.93625	0.00238419	3.93958	-0.31662	3.9377	1.16205	3.93937	23.9663	3.9375	4.46463	3.93417	8.73709
3.94292	-0.00953674	3.94625	-0.338554	3.94437	1.13869	3.94603	25.0397	3.94417	4.40502	3.94083	8.87775
3.94958	-0.0281334	3.95292	-0.351906	3.95103	1.11485	3.9527	26.1917	3.95083	4.35019	3.9475	9.04131
3.95625	-0.0524521	3.95958	-0.360966	3.9577	1.09243	3.95937	27.4115	3.9575	4.30155	3.95417	9.23204
3.96292	-0.0815392	3.96625	-0.370026	3.96437	1.07241	3.96603	28.687	3.96417	4.26006	3.96083	9.45282
3.96958	-0.113487	3.97292	-0.382423	3.97103	1.0581	3.9727	30.0035	3.97083	4.22525	3.9675	9.70697
3.97625	-0.144958	3.97958	-0.40102	3.9777	1.05238	3.97937	31.3449	3.9775	4.1976	3.97417	9.99975
3.98292	-0.172615	3.98625	-0.426292	3.98437	1.05715	3.98603	32.6929	3.98417	4.17662	3.98083	10.335
3.98958	-0.195503	3.99292	-0.458241	3.99103	1.07622	3.9927	34.0295	3.99083	4.16279	3.9875	10.7169
3.99625	-0.212193	3.99958	-0.495434	3.9977	1.11198	3.99937	35.3355	3.9975	4.15564	3.99417	11.1499
4.00292	-0.222206	4.00625	-0.535011	4.00437	1.1692	4.00603	36.5958	4.00417	4.15421	4.00083	11.6377
4.00958	-0.225544	4.01292	-0.573635	4.01103	1.25074	4.0127	37.7955	4.01083	4.1585	4.0075	12.1827
4.01625	-0.222206	4.01958	-0.607967	4.0177	1.36042	4.01937	38.9242	4.0175	4.16803	4.01417	12.7873
4.02292	-0.212193	4.02625	-0.636578	4.02437	1.50442	4.02603	39.9742	4.02417	4.18234	4.02083	13.4516
4.02958	-0.196457	4.03292	-0.658512	4.03103	1.688	4.0327	40.9389	4.03083	4.20284	4.0275	14.1726
4.03625	-0.177383	4.03958	-0.671864	4.0377	1.91641	4.03937	41.8115	4.0375	4.2305	4.03417	14.9465
4.04292	-0.154495	4.04625	-0.675678	4.04437	2.19488	4.04603	42.5835	4.04417	4.26531	4.04083	15.77
4.04958	-0.126839	4.05292	-0.669479	4.05103	2.53057	4.0527	43.2444	4.05083	4.30965	4.0475	16.6378
4.05625	-0.0944138	4.05958	-0.653744	4.0577	2.92921	4.05937	43.7822	4.0575	4.36401	4.05417	17.5447
4.06292	-0.0581741	4.06625	-0.629425	4.06437	3.39842	4.06603	44.1852	4.06417	4.42934	4.06083	18.4875
4.06958	-0.0171661	4.07292	-0.596046	4.07103	3.94535	4.0727	44.4412	4.07083	4.50563	4.0675	19.4645
4.07625	0.0290871	4.07958	-0.554562	4.0777	4.57621	4.07937	44.5385	4.0775	4.5929	4.07417	20.473
4.08292	0.082016	4.08625	-0.506878	4.08437	5.29957	4.08603	44.4665	4.08417	4.69303	4.08083	21.5111
4.08958	0.14019	4.09292	-0.453472	4.09103	6.12354	4.0927	44.2181	4.09083	4.80604	4.0875	22.5763
4.09625	0.203609	4.09958	-0.394821	4.0977	7.05767	4.09937	43.7946	4.0975	4.93193	4.09417	23.6669
4.10292	0.272751	4.10625	-0.332355	4.10437	8.11195	4.10603	43.2053	4.10417	5.07021	4.10083	24.776
4.10958	0.349522	4.11292	-0.266552	4.11103	9.29451	4.1127	42.4685	4.11083	5.22089	4.1075	25.897
4.11625	0.434399	4.11958	-0.198841	4.1177	10.6125	4.11937	41.6145	4.1175	5.38254	4.11417	27.0185
4.12292	0.528336	4.12625	-0.128269	4.12437	12.0692	4.12603	40.6809	4.12417	5.55325	4.12083	28.1267
4.12958	0.631332	4.13292	-0.0543594	4.13103	13.6657	4.1327	39.7086	4.13083	5.73206	4.1275	29.2034
4.13625	0.742912	4.13958	0.023365	4.1377	15.3975	4.13937	38.7359	4.1375	5.91993	4.13417	30.2296
4.14292	0.863075	4.14625	0.106335	4.14437	17.2586	4.14603	37.7946	4.14417	6.11639	4.14083	31.1852
4.14958	0.990868	4.15292	0.195026	4.15103	19.238	4.1527	36.9062	4.15083	6.32429	4.1475	32.0506
4.15625	1.12724	4.15958	0.291348	4.1577	21.3227	4.15937	36.0804	4.1575	6.54411	4.15417	32.8112
4.16292	1.27172	4.16625	0.394344	4.16437	23.499	4.16603	35.3136	4.16417	6.77967	4.16083	33.4554
4.16958	1.42574	4.17292	0.504494	4.17103	25.7525	4.1727	34.5945	4.17083	7.03239	4.1675	33.9799
4.17625	1.59216	4.17958	0.620842	4.1777	28.0738	4.17937	33.9046	4.1775	7.30944	4.17417	34.3928
4.18292	1.77288	4.18625	0.742912	4.18437	30.4565	4.18603	33.2198	4.18417	7.62463	4.18083	34.7166
4.18958	1.97172	4.19292	0.869751	4.19103	32.9094	4.1927	32.516	4.19083	8.01325	4.1875	35.0008
4.19625	2.19584	4.19958	0.999928	4.1977	35.4667	4.19937	31.7712	4.1975	8.55017	4.19417	35.3408
4.20292	2.46191	4.20625	1.13344	4.20437	38.2137	4.20603	30.9672	4.20417	9.38416	4.20083	35.9097
4.20958	2.80476	4.21292	1.27316	4.21103	41.3251	4.2127	30.0913	4.21083	10.7803	4.2075	36.9868
4.21625	3.29828	4.21958	1.42288	4.2177	45.1078	4.21937	29.1409	4.2175	13.1574	4.21417	38.9762
4.22292	4.07314	4.22625	1.59454	4.22437	50.0393	4.22603	28.1324	4.22417	17.0894	4.22083	42.3903
4.22958	5.33724	4.23292	1.8115	4.23103	56.7584	4.2327	27.1134	4.23083	23.2377	4.2275	47.7691
4.23625	7.37619	4.23958	2.12002	4.2377	65.979	4.23937	26.1917	4.2375	32.1903	4.23417	55.531
4.24292	10.5233	4.24625	2.60544	4.24437	78.3062	4.24603	25.5742	4.24417	44.2219	4.24083	65.7973
4.24958	15.0828	4.25292	3.40939	4.25103	93.9879	4.2527	25.6114	4.25083	59.0534	4.2475	78.2452
4.25625	21.2231	4.25958	4.74596	4.2577	112.691	4.25937	26.8207	4.2575	75.7298	4.25417	92.0653
4.26292	28.8582	4.26625	6.89173	4.26437	133.402	4.26603	29.861	4.26417	92.7005	4.26083	106.056
4.26958	37.5776	4.27292	10.1395	4.27103	154.52	4.2727	35.4238	4.27083	108.108	4.2675	118.842
4.27625	46.6557	4.27958	14.7099	4.2777	174.117	4.27937	44.0483	4.2775	120.21	4.27417	129.157
4.28292	55.1562	4.28625	20.6437	4.28437	190.327	4.28603	55.8848	4.28417	127.811	4.28083	136.096
4.28958	62.1209	4.29292	27.709	4.29103	201.715	4.2927	70.5013	4.29083	130.542	4.2875	139.272
4.29625	66.7801	4.29958	35.3713	4.2977	207.528	4.29937	86.813	4.2975	128.913	4.29417	138.815
4.30292	68.7218	4.30625	42.8567	4.30437	207.77	4.30603	103.207	4.30417	124.11	4.30083	135.265
4.30958	67.9669	4.31292	49.2978	4.31103	203.083	4.3127	117.838	4.31083	117.629	4.3075	129.382
4.31625	64.929	4.31958	53.9331	4.3177	194.518	4.31937	129.006	4.3175	110.882	4.31417	121.976
4.32292	60.2813	4.32625	56.2825	4.32437	183.287	4.32603	135.514	4.32417	104.899	4.32083	113.783
4.32958	54.7848	4.33292	56.2534	4.33103	170.56	4.3327	136.901	4.33083	100.19	4.3275	105.397
4.33625	49.1314	4.33958	54.1348	4.3377	157.344	4.33937	133.492	4.3375	96.7779	4.33417	97.2543
4.34292	43.8395	4.34625	50.4971	4.34437	144.427	4.34603	126.25	4.34417	94.3346	4.34083	89.6387
4.34958	39.2227	4.35292	46.03	4.35103	132.36	4.3527	116.5	4.35083	92.3691	4.3475	82.7007
4.35625	35.4161	4.35958	41.3895	4.3577	121.467	4.35937	105.629	4.3575	90.4036	4.35417	76.4761
4.36292	32.4273	4.36625	37.0841	4.36437	111.864	4.36603	94.8386	4.36417	88.0976	4.36083	70.9162
4.36958	30.1933	4.37292	33.4272	4.37103	103.504	4.3727	84.9991	4.37083	85.3176	4.3675	65.9275
4.37625	28.6131	4.37958	30.55	4.3777	96.2329	4.37937	76.5944	4.3775	82.1366	4.37417	61.4157
4.38292	27.566	4.38625	28.4414	4.38437	89.8499	4.38603	69.7575	4.38417	78.7826	4.38083	57.3158
4.38958	26.9227	4.39292	26.9976	4.39103	84.1603	4.3927	64.3492	4.39083	75.5596	4.3875	53.6017
4.39625	26.5603	4.39958	26.0653	4.3977	79.0067	4.39937	60.0777	4.3975	72.7587	4.39417	50.2715
4.40292	26.3667	4.40625	25.4784	4.40437	74.2683	4.40603	56.6077	4.40417	70.5867	4.40083	47.3247
4.40958	26.2384	4.41292	25.0854	4.41103	69.8533	4.4127	53.6556	4.41083	69.1295	4.4075	44.7459
4.41625	26.0859	4.41958	24.7698	4.4177	65.6919	4.41937	51.0392	4.4175	68.3556	4.41417	42.5067
4.42292	25.8603	4.42625	24.4617	4.42437	61.7452	4.42603	48.6822	4.42417	68.1467	4.42083	40.5612
4.42958	25.5733	4.43292	24.1308	4.43103	57.9939	4.4327	46.5846	4.43083	68.3398	4.4275	38.8403
4.43625	25.2614	4.43958	23.7699	4.4377	54.4219	4.43937	44.7764	4.4375	68.7642	4.43417	37.2586
4.44292	24.9391	4.44625	23.385	4.44437	51.0201	4.44603	43.2825	4.44417	69.2563	4.44083	35.7504
4.44958	24.5919	4.45292	22.9998	4.45103	47.812	4.4527	42.0947	4.45083	69.6702	4.4475	34.2941
4.45625	24.2267	4.45958	22.6507	4.4577	44.8494	4.45937	41.1634	4.4575	69.8967	4.45417	32.8918
4.46292	23.8857	4.46625	22.3508	4.46437	42.1686	4.46603	40.4067	4.46417	69.8786	4.46083	31.5337
4.46958	23.603	4.47292	22.069	4.47103	39.7577	4.4727	39.7367	4.47083	69.5992	4.4675	30.2062
4.47625	23.3827	4.47958	21.7643	4.4777	37.5786	4.47937	39.0811	4.4775	69.0479	4.47417	28.9178
4.48292	23.221	4.48625	21.4338	4.48437	35.6007	4.48603	38.394	4.48417	68.2049	4.48083	27.6966
4.48958	23.1123	4.49292	21.112	4.49103	33.8092	4.4927	37.6649	4.49083	67.0485	4.4875	26.5641
4.49625	23.0236	4.49958	20.8335	4.4977	32.197	4.49937	36.9129	4.4975	65.5689	4.49417	25.5342
4.50292	22.892	4.50625	20.618	4.50437	30.7651	4.50603	36.1676	4.50417	63.766	4.50083	24.6334
4.50958	22.6684	4.51292	20.4821	4.51103	29.5181	4.5127	35.4671	4.51083	61.6508	4.5075	23.8943
4.51625	22.3408	4.51958	20.4315	4.5177	28.4429	4.51937	34.8682	4.5175	59.2623	4.51417	23.3278
4.52292	21.9169	4.52625	20.4272	4.52437	27.4959	4.52603	34.4334	4.52417	56.6778	4.52083	22.9158
4.52958	21.4076	4.53292	20.3919	4.53103	26.6147	4.5327	34.1921	4.53083	54.0004	4.5275	22.6278
4.53625	20.8302	4.53958	20.2551	4.5377	25.7311	4.53937	34.1153	4.5375	51.3248	4.53417	22.44
4.54292	20.2107	4.54625	19.9823	4.54437	24.7908	4.54603	34.1311	4.54417	48.7242	4.54083	22.3312
4.54958	19.5799	4.55292	19.5723	4.55103	23.7803	4.5527	34.1554	4.55083	46.2494	4.5475	22.285
4.55625	18.9767	4.55958	19.0473	4.5577	22.7537	4.55937	34.101	4.5575	43.9477	4.55417	22.3031
4.56292	18.465	4.56625	18.4584	4.56437	21.8158	4.56603	33.8836	4.56417	41.8777	4.56083	22.4152
4.56958	18.1274	4.57292	17.8771	4.57103	21.0757	4.5727	33.4477	4.57083	40.1168	4.5675	22.6641
4.57625	18.0345	4.57958	17.374	4.5777	20.6051	4.57937	32.8021	4.5775	38.7554	4.57417	23.0856
4.58292	18.2114	4.58625	17.0031	4.58437	20.4372	4.58603	32.0225	4.58417	37.8757	4.58083	23.6998
4.58958	18.6334	4.59292	16.8104	4.59103	20.5736	4.5927	31.2195	4.59083	37.5261	4.5875	24.5123
4.59625	19.2418	4.59958	16.8328	4.5977	20.9846	4.59937	30.4985	4.5975	37.715	4.59417	25.5089
4.60292	19.9671	4.60625	17.0813	4.60437	21.6112	4.60603	29.9435	4.60417	38.4092	4.60083	26.6447
4.60958	20.7477	4.61292	17.5266	4.61103	22.3875	4.6127	29.6087	4.61083	39.5465	4.6075	27.8502
4.61625	21.5406	4.61958	18.1131	4.6177	23.2644	4.61937	29.5162	4.6175	41.0428	4.61417	29.0494
4.62292	22.325	4.62625	18.7807	4.62437	24.22	4.62603	29.6488	4.62417	42.8071	4.62083	30.1809
4.62958	23.0918	4.63292	19.484	4.63103	25.2471	4.6327	29.9587	4.63083	44.7378	4.6275	31.2028
4.63625	23.8376	4.63958	20.1945	4.6377	26.3386	4.63937	30.3841	4.6375	46.7215	4.63417	32.0921
4.64292	24.5552	4.64625	20.896	4.64437	27.4711	4.64603	30.8728	4.64417	48.6259	4.64083	32.8422
4.64958	25.238	4.65292	21.5764	4.65103	28.6055	4.6527	31.3945	4.65083	50.3106	4.6475	33.4544
4.65625	25.8818	4.65958	22.2239	4.6577	29.6898	4.65937	31.9376	4.6575	51.6472	4.65417	33.9236
4.66292	26.4816	4.66625	22.8314	4.66437	30.664	4.66603	32.4974	4.66417	52.5436	4.66083	34.234
4.66958	27.0348	4.67292	23.3994	4.67103	31.4736	4.6727	33.0658	4.67083	52.9599	4.6675	34.3671
4.67625	27.5383	4.67958	23.9286	4.6777	32.0911	4.67937	33.6313	4.6775	52.9151	4.67417	34.317
4.68292	27.9961	4.68625	24.4164	4.68437	32.5332	4.68603	34.1768	4.68417	52.475	4.68083	34.0958
4.68958	28.419	4.69292	24.859	4.69103	32.8455	4.6927	34.6889	4.69083	51.7306	4.6875	33.73
4.69625	28.8258	4.69958	25.2614	4.6977	33.0815	4.69937	35.1701	4.6975	50.765	4.69417	33.2565
4.70292	29.2406	4.70625	25.6357	4.70437	33.2794	4.70603	35.6374	4.70417	49.6321	4.70083	32.7258
4.70958	29.6841	4.71292	25.9967	4.71103	33.4592	4.7127	36.1156	4.71083	48.357	4.7075	32.2056
4.71625	30.1628	4.71958	26.3495	4.7177	33.6194	4.71937	36.6187	4.7175	46.9575	4.71417	31.7683
4.72292	30.6659	4.72625	26.6957	4.72437	33.7391	4.72603	37.1408	4.72417	45.4683	4.72083	31.4698
4.72958	31.1723	4.73292	27.0395	4.73103	33.7844	4.7327	37.6644	4.73083	43.952	4.7275	31.3373
4.73625	31.6567	4.73958	27.391	4.7377	33.7305	4.73937	38.1689	4.7375	42.4943	4.73417	31.3663
4.74292	32.094	4.74625	27.7591	4.74437	33.5746	4.74603	38.6329	4.74417	41.1968	4.74083	31.5251
4.74958	32.4626	4.75292	28.1534	4.75103	33.3381	4.7527	39.0344	4.75083	40.1559	4.7475	31.7583
4.75625	32.7621	4.75958	28.5859	4.7577	33.0548	4.75937	39.3581	4.7575	39.4402	4.75417	31.9886
4.76292	33.0133	4.76625	29.0675	4.76437	32.7563	4.76603	39.6042	4.76417	39.0635	4.76083	32.1326
4.76958	33.2518	4.77292	29.6044	4.77103	32.4669	4.7727	39.7806	4.77083	38.9781	4.7675	32.1279
4.77625	33.5069	4.77958	30.1924	4.7777	32.2061	4.77937	39.8984	4.7775	39.0821	4.77417	31.9524
4.78292	33.7939	4.78625	30.8166	4.78437	31.9924	4.78603	39.9709	4.78417	39.2523	4.78083	31.6343
4.78958	34.1158	4.79292	31.4531	4.79103	31.8432	4.7927	40.0205	4.79083	39.3744	4.7875	31.24
4.79625	34.4658	4.79958	32.0697	4.7977	31.7736	4.79937	40.082	4.7975	39.372	4.79417	30.8561
4.80292	34.8315	4.80625	32.6343	4.80437	31.7912	4.80603	40.1921	4.80417	39.2184	4.80083	30.5676
4.80958	35.2006	4.81292	33.1173	4.81103	31.898	4.8127	40.3776	4.81083	38.9314	4.8075	30.4356
4.81625	35.5649	4.81958	33.4973	4.8177	32.0892	4.81937	40.6508	4.8175	38.569	4.81417	30.4904
4.82292	35.9278	4.82625	33.7625	4.82437	32.3606	4.82603	41.0166	4.82417	38.2061	4.82083	30.7307
4.82958	36.2973	4.83292	33.9141	4.83103	32.7082	4.8327	41.4715	4.83083	37.9128	4.8275	31.1241
4.83625	36.6855	4.83958	33.9618	4.8377	33.1316	4.83937	42.0032	4.8375	37.735	4.83417	31.6105
4.84292	37.107	4.84625	33.9241	4.84437	33.6313	4.84603	42.5935	4.84417	37.6897	4.84083	32.1259
4.84958	37.5748	4.85292	33.824	4.85103	34.2069	4.8527	43.2162	4.85083	37.7722	4.8475	32.6295
4.85625	38.1012	4.85958	33.6905	4.8577	34.8577	4.85937	43.8471	4.8575	37.9691	4.85417	33.1168
4.86292	38.6958	4.86625	33.5517	4.86437	35.5868	4.86603	44.4674	4.86417	38.2676	4.86083	33.6061
4.86958	39.3658	4.87292	33.4363	4.87103	36.397	4.8727	45.0673	4.87083	38.6639	4.8675	34.1172
4.87625	40.1096	4.87958	33.371	4.8777	37.2877	4.87937	45.6405	4.8775	39.1626	4.87417	34.6699
4.88292	40.9069	4.88625	33.3748	4.88437	38.2528	4.88603	46.1855	4.88417	39.773	4.88083	35.2736
4.88958	41.7228	4.89292	33.4544	4.89103	39.2723	4.8927	46.7052	4.89083	40.4968	4.8875	35.9173
4.89625	42.5177	4.89958	33.5989	4.8977	40.3132	4.89937	47.2035	4.8975	41.3213	4.89417	36.5672
4.90292	43.2591	4.90625	33.7892	4.90437	41.3337	4.90603	47.6756	4.90417	42.2096	4.90083	37.1799
4.90958	43.9315	4.91292	34.0095	4.91103	42.2926	4.9127	48.1157	4.91083	43.1023	4.9075	37.724
4.91625	44.5466	4.91958	34.2584	4.9177	43.1638	4.91937	48.522	4.9175	43.9305	4.91417	38.1923
4.92292	45.1522	4.92625	34.5469	4.92437	43.9482	4.92603	48.9044	4.92417	44.632	4.92083	38.6019
4.92958	45.8064	4.93292	34.9016	4.93103	44.6768	4.9327	49.2759	4.93083	45.1722	4.9275	38.9867
4.93625	46.5364	4.93958	35.3694	4.9377	45.3982	4.93937	49.6473	4.9375	45.5537	4.93417	39.3848
4.94292	47.3104	4.94625	36.0041	4.94437	46.1607	4.94603	50.0274	4.94417	45.8131	4.94083	39.8283
4.94958	48.0528	4.95292	36.8299	4.95103	46.9894	4.9527	50.4169	4.95083	46.0086	4.9475	40.3461
4.95625	48.6736	4.95958	37.8132	4.9577	47.8692	4.95937	50.808	4.9575	46.1974	4.95417	40.9718
4.96292	49.0975	4.96625	38.8632	4.96437	48.7366	4.96603	51.1847	4.96417	46.4182	4.96083	41.7252
4.96958	49.2935	4.97292	39.8598	4.97103	49.4866	4.9727	51.5394	4.97083	46.6704	4.9675	42.5868
4.97625	49.2926	4.97958	40.6795	4.9777	49.9992	4.97937	51.8775	4.9775	46.9189	4.97417	43.4794
4.98292	49.1953	4.98625	41.2259	4.98437	50.1766	4.98603	52.2165	4.98417	47.1101	4.98083	44.2877
4.98958	49.1495	4.99292	41.4677	4.99103	49.9735	4.9927	52.599	4.99083	47.1983	4.9875	44.8995
4.99625	49.3059	4.99958	41.4615	4.9977	49.4046	4.99937	53.1092	4.9975	47.1606	4.99417	45.2394
5.00292	49.7665	5.00625	41.3394	5.00437	48.5444	5.00603	53.8712	5.00417	46.9961	5.00083	45.2909
5.00958	50.56	5.01292	41.2498	5.01103	47.5206	5.0127	54.9965	5.01083	46.7238	5.0075	45.0997
5.01625	51.6577	5.01958	41.3203	5.0177	46.505	5.01937	56.5333	5.0175	46.3829	5.01417	44.7655
5.02292	52.9981	5.02625	41.6574	5.02437	45.6858	5.02603	58.4378	5.02417	46.0267	5.02083	44.4126
5.02958	54.4662	5.03292	42.3579	5.03103	45.2318	5.0327	60.5927	5.03083	45.7134	5.0275	44.1456
5.03625	55.8567	5.03958	43.4742	5.0377	45.2356	5.03937	62.8328	5.0375	45.485	5.03417	44.0016
5.04292	56.9019	5.04625	44.9576	5.04437	45.6662	5.04603	64.9633	5.04417	45.3472	5.04083	43.9272
5.04958	57.3683	5.05292	46.6537	5.05103	46.36	5.0527	66.7772	5.05083	45.2561	5.0475	43.7961
5.05625	57.1327	5.05958	48.358	5.0577	47.0796	5.05937	68.1095	5.0575	45.1298	5.05417	43.4647
5.06292	56.1867	5.06625	49.8619	5.06437	47.5955	5.06603	68.8996	5.06417	44.8766	5.06083	42.8357
5.06958	54.6265	5.07292	50.9677	5.07103	47.7462	5.0727	69.2029	5.07083	44.4236	5.0675	41.8835
5.07625	52.6619	5.07958	51.506	5.0777	47.4677	5.07937	69.119	5.0775	43.7369	5.07417	40.6537
5.08292	50.5915	5.08625	51.3973	5.08437	46.8068	5.08603	68.7003	5.08417	42.8357	5.08083	39.2528
5.08958	48.7103	5.09292	50.6902	5.09103	45.9056	5.0927	67.9288	5.09083	41.7957	5.0875	37.8342
5.09625	47.2145	5.09958	49.5358	5.0977	44.9309	5.09937	66.7586	5.0975	40.7267	5.09417	36.5582
5.10292	46.1721	5.10625	48.1191	5.10437	44.0016	5.10603	65.1727	5.10417	39.7387	5.10083	35.5511
5.10958	45.5618	5.11292	46.6137	5.11103	43.1533	5.1127	63.19	5.11083	38.9113	5.1075	34.8916
5.11625	45.32	5.11958	45.1713	5.1177	42.3689	5.11937	60.8683	5.1175	38.2848	5.11417	34.6413
5.12292	45.3591	5.12625	43.9191	5.12437	41.6183	5.12603	58.3329	5.12417	37.8675	5.12083	34.8835
5.12958	45.5723	5.13292	42.9473	5.13103	40.8926	5.1327	55.7847	5.13083	37.662	5.1275	35.7428
5.13625	45.8426	5.13958	42.2878	5.1377	40.2141	5.13937	53.4449	5.1375	37.6878	5.13417	37.3383
5.14292	46.0711	5.14625	41.9049	5.14437	39.628	5.14603	51.4679	5.14417	37.9968	5.14083	39.701
5.14958	46.1864	5.15292	41.7161	5.15103	39.1927	5.1527	49.8991	5.15083	38.6629	5.1475	42.697
5.15625	46.1459	5.15958	41.6203	5.1577	38.9657	5.15937	48.7056	5.1575	39.7515	5.15417	46.0124
5.16292	45.928	5.16625	41.5287	5.16437	38.9957	5.16603	47.8311	5.16417	41.275	5.16083	49.2129
5.16958	45.537	5.17292	41.3775	5.17103	39.3233	5.1727	47.2302	5.17083	43.1504	5.1675	51.8479
5.17625	45.0115	5.17958	41.131	5.1777	39.9685	5.17937	46.8798	5.1775	45.1922	5.17417	53.5583
5.18292	44.4117	5.18625	40.7834	5.18437	40.915	5.18603	46.7725	5.18417	47.1501	5.18083	54.1673
5.18958	43.8051	5.19292	40.3571	5.19103	42.1004	5.1927	46.895	5.19083	48.7785	5.1875	53.72
5.19625	43.2625	5.19958	39.8974	5.1977	43.4251	5.19937	47.2116	5.1975	49.9067	5.19417	52.4545
5.20292	42.8553	5.20625	39.4702	5.20437	44.7674	5.20603	47.6608	5.20417	50.4761	5.20083	50.7069
5.20958	42.6474	5.21292	39.1521	5.21103	45.9895	5.2127	48.1801	5.21083	50.5381	5.2075	48.7986
5.21625	42.6722	5.21958	39.0148	5.2177	46.9475	5.21937	48.7337	5.2175	50.2052	5.21417	46.9637
5.22292	42.9168	5.22625	39.0973	5.22437	47.513	5.22603	49.3288	5.22417	49.5934	5.22083	45.3286
5.22958	43.3183	5.23292	39.3834	5.23103	47.6007	5.2327	50.0169	5.23083	48.7795	5.2275	43.9324
5.23625	43.7799	5.23958	39.803	5.2377	47.1854	5.23937	50.8881	5.2375	47.7967	5.23417	42.7499
5.24292	44.1885	5.24625	40.2484	5.24437	46.3052	5.24603	52.0391	5.24417	46.658	5.24083	41.7209
5.24958	44.4455	5.25292	40.6003	5.25103	45.0573	5.2527	53.5235	5.25083	45.3877	5.2475	40.7777
5.25625	44.5113	5.25958	40.7534	5.2577	43.5839	5.25937	55.2926	5.2575	44.0431	5.25417	39.875
5.26292	44.467	5.26625	40.6518	5.26437	42.0499	5.26603	57.1847	5.26417	42.7113	5.26083	39
5.26958	44.5185	5.27292	40.3299	5.27103	40.6299	5.2727	58.959	5.27083	41.4796	5.2675	38.1761
5.27625	44.9114	5.27958	39.9451	5.2777	39.5241	5.27937	60.3523	5.2775	40.4177	5.27417	37.4751
5.28292	45.8159	5.28625	39.7401	5.28437	38.9585	5.28603	61.1482	5.28417	39.588	5.28083	37.0364
5.28958	47.2655	5.29292	39.9504	5.29103	39.1221	5.2927	61.2283	5.29083	39.0854	5.2875	37.0502
5.29625	49.1605	5.29958	40.7062	5.2977	40.0777	5.29937	60.6046	5.2975	39.0444	5.29417	37.6782
5.30292	51.2815	5.30625	41.9984	5.30437	41.7433	5.30603	59.4096	5.30417	39.5842	5.30083	38.9633
5.30958	53.3338	5.31292	43.6964	5.31103	43.9487	5.3127	57.8523	5.31083	40.7352	5.3075	40.8082
5.31625	55.0408	5.31958	45.568	5.3177	46.4897	5.31937	56.169	5.3175	42.4261	5.31417	43.0193
5.32292	56.2472	5.32625	47.3366	5.32437	49.14	5.32603	54.6141	5.32417	44.5085	5.32083	45.361
5.32958	56.9611	5.33292	48.7761	5.33103	51.6701	5.3327	53.4554	5.33083	46.7768	5.3275	47.5893
5.33625	57.3115	5.33958	49.8013	5.3377	53.896	5.33937	52.9313	5.3375	48.9831	5.33417	49.4919
5.34292	57.4741	5.34625	50.4704	5.34437	55.6903	5.34603	53.1712	5.34417	50.8962	5.34083	50.9243
5.34958	57.5914	5.35292	50.9086	5.35103	56.9506	5.3527	54.1549	5.35083	52.3605	5.3475	51.8188
5.35625	57.7216	5.35958	51.2109	5.3577	57.5757	5.35937	55.7408	5.3575	53.3142	5.35417	52.1655
5.36292	57.8446	5.36625	51.394	5.36437	57.4927	5.36603	57.6878	5.36417	53.7534	5.36083	51.99
5.36958	58.1827	5.37292	51.425	5.37103	56.7107	5.3727	59.6704	5.37083	53.7047	5.3675	51.3401
5.37625	61.2645	5.37958	51.5227	5.3777	55.3489	5.37937	61.3503	5.3775	53.2279	5.37417	50.2958
5.38292	77.3659	5.38625	54.0061	5.38437	53.6194	5.38603	62.5005	5.38417	52.4616	5.38083	48.9874
5.38958	128.997	5.39292	68.0594	5.39103	51.8022	5.3927	63.0898	5.39083	52.0697	5.3875	47.5883
5.39625	245.741	5.39958	113.408	5.3977	50.5147	5.39937	63.2572	5.3975	55.3594	5.39417	46.2623
5.40292	448.509	5.40625	215.535	5.40437	52.3925	5.40603	63.2019	5.40417	72.6991	5.40083	45.1055
5.40958	735.243	5.41292	392.402	5.41103	65.7125	5.4127	63.0832	5.41083	123.93	5.4075	44.1504
5.41625	1079.77	5.41958	642.736	5.4177	106.178	5.41937	62.9659	5.4175	232.361	5.41417	43.457
5.42292	1439.07	5.42625	944.535	5.42437	191.497	5.42603	62.8414	5.42417	411.409	5.42083	43.3483
5.42958	1760.67	5.43292	1259.94	5.43103	330.284	5.4327	62.6678	5.43083	654.237	5.4275	44.7226
5.43625	1992.54	5.43958	1541.62	5.4377	514.355	5.43937	62.4027	5.4375	933.779	5.43417	49.0484
5.44292	2099.17	5.44625	1742.92	5.44437	720.088	5.44603	62.0623	5.44417	1209.27	5.44083	57.6248
5.44958	2075.26	5.45292	1832.92	5.45103	914.67	5.4527	61.8906	5.45083	1434.29	5.4475	70.4846
5.45625	1943.95	5.45958	1807.39	5.4577	1063.04	5.45937	62.6726	5.4575	1568.03	5.45417	85.9451
5.46292	1741.95	5.46625	1686.9	5.46437	1137.01	5.46603	65.8898	5.46417	1589.16	5.46083	101.212
5.46958	1505.35	5.47292	1504.63	5.47103	1125.65	5.4727	73.174	5.47083	1504.08	5.4675	113.338
5.47625	1263.24	5.47958	1294.11	5.4777	1039.86	5.47937	85.1679	5.4775	1341.73	5.47417	119.895
5.48292	1036.46	5.48625	1082.36	5.48437	906.078	5.48603	100.759	5.48417	1139.67	5.48083	119.569
5.48958	837.39	5.49292	887.514	5.49103	754.222	5.4927	117.404	5.49083	931.459	5.4875	112.761
5.49625	670.792	5.49958	719.028	5.4977	608.058	5.49937	132.044	5.4975	740.414	5.49417	101.594
5.50292	535.969	5.50625	579.369	5.50437	481.416	5.50603	141.821	5.50417	578.818	5.50083	88.9468
5.50958	429.266	5.51292	466.637	5.51103	379.049	5.5127	144.693	5.51083	449.893	5.5075	77.1861
5.51625	345.951	5.51958	377.001	5.5177	299.719	5.51937	140.218	5.5175	351.006	5.51417	67.533
5.52292	281.329	5.52625	306.247	5.52437	239.51	5.52603	129.932	5.52417	276.868	5.52083	60.2207
5.52958	231.296	5.53292	250.546	5.53103	194.119	5.5327	116.672	5.53083	221.833	5.5275	54.9593
5.53625	192.521	5.53958	206.697	5.5377	159.876	5.53937	103.228	5.5375	181.032	5.53417	51.2853
5.54292	162.442	5.54625	172.153	5.54437	133.948	5.54603	91.3939	5.54417	150.652	5.54083	48.7447
5.54958	139.143	5.55292	144.957	5.55103	114.226	5.5527	81.8386	5.55083	127.84	5.5475	46.9704
5.55625	121.176	5.55958	123.636	5.5577	99.1645	5.55937	74.4872	5.5575	110.517	5.55417	45.7273
5.56292	107.391	5.56625	107.081	5.56437	87.6741	5.56603	68.9497	5.56417	97.2223	5.56083	44.9767
5.56958	96.8246	5.57292	94.3985	5.57103	79.0863	5.5727	64.7936	5.57083	86.987	5.5675	44.9562
5.57625	88.6674	5.57958	84.8083	5.5777	73.091	5.57937	61.6689	5.5775	79.1945	5.57417	46.1984
5.58292	82.2659	5.58625	77.5957	5.58437	69.5715	5.58603	59.351	5.58417	73.4358	5.58083	49.3259
5.58958	77.1375	5.59292	72.1226	5.59103	68.3422	5.5927	57.7521	5.59083	69.3684	5.5875	54.637
5.59625	72.9604	5.59958	67.8515	5.5977	68.9464	5.59937	56.9282	5.5975	66.6237	5.59417	61.7642
5.60292	69.5372	5.60625	64.3697	5.60437	70.6487	5.60603	57.0612	5.60417	64.7869	5.60083	69.6845
5.60958	66.75	5.61292	61.3976	5.61103	72.5789	5.6127	58.3849	5.61083	63.436	5.6075	77.0326
5.61625	64.5108	5.61958	58.785	5.6177	73.9141	5.61937	61.0728	5.6175	62.2077	5.61417	82.5052
5.62292	62.7232	5.62625	56.479	5.62437	74.059	5.62603	65.1283	5.62417	60.8687	5.62083	85.2342
5.62958	61.2655	5.63292	54.4729	5.63103	72.8154	5.6327	70.3287	5.63083	59.3624	5.6275	85.0844
5.63625	60.0052	5.63958	52.7601	5.6377	70.437	5.63937	76.2324	5.6375	57.7874	5.63417	82.7274
5.64292	58.8236	5.64625	51.3072	5.64437	67.4868	5.64603	82.2515	5.64417	56.3159	5.64083	79.3414
5.64958	57.6472	5.65292	50.0607	5.65103	64.5576	5.6527	87.8072	5.65083	55.0861	5.6475	76.066
5.65625	56.4499	5.65958	48.9626	5.6577	62.0332	5.65937	92.4931	5.6575	54.141	5.65417	73.5455
5.66292	55.2425	5.66625	47.9622	5.66437	60.0095	5.66603	96.1485	5.66417	53.4201	5.66083	71.8093
5.66958	54.0571	5.67292	47.0214	5.67103	58.3611	5.6727	98.8159	5.67083	52.7949	5.6675	70.446
5.67625	52.9294	5.67958	46.1164	5.6777	56.8633	5.67937	100.647	5.6775	52.1173	5.67417	68.8996
5.68292	51.8942	5.68625	45.2404	5.68437	55.3145	5.68603	101.847	5.68417	51.2767	5.68083	66.7448
5.68958	50.9887	5.69292	44.4069	5.69103	53.6127	5.6927	102.668	5.69083	50.2329	5.6875	63.8399
5.69625	50.2553	5.69958	43.6492	5.6977	51.7764	5.69937	103.477	5.6975	49.0212	5.69417	60.3437
5.70292	49.7336	5.70625	43.016	5.70437	49.9196	5.70603	104.861	5.70417	47.72	5.70083	56.6001
5.70958	49.4399	5.71292	42.5539	5.71103	48.1939	5.7127	107.672	5.71083	46.4153	5.7075	52.9876
5.71625	49.3455	5.71958	42.2869	5.7177	46.7482	5.71937	112.921	5.7175	45.1884	5.71417	49.7947
5.72292	49.3813	5.72625	42.1987	5.72437	45.7039	5.72603	121.456	5.72417	44.1113	5.72083	47.1702
5.72958	49.4618	5.73292	42.2354	5.73103	45.1431	5.7327	133.485	5.73083	43.2444	5.7275	45.135
5.73625	49.511	5.73958	42.3298	5.7377	45.0864	5.73937	148.107	5.7375	42.6173	5.73417	43.6258
5.74292	49.4752	5.74625	42.4242	5.74437	45.4736	5.74603	163.138	5.74417	42.2144	5.74083	42.5339
5.74958	49.3321	5.75292	42.4795	5.75103	46.1669	5.7527	175.562	5.75083	41.9784	5.7475	41.7395
5.75625	49.0904	5.75958	42.4829	5.7577	46.9785	5.75937	182.472	5.7575	41.8329	5.75417	41.1315
5.76292	48.7852	5.76625	42.4504	5.76437	47.7109	5.76603	182.047	5.76417	41.7047	5.76083	40.6213
5.76958	48.4538	5.77292	42.4137	5.77103	48.2044	5.7727	174.074	5.77083	41.5373	5.7675	40.1554
5.77625	48.121	5.77958	42.3956	5.7777	48.3828	5.77937	159.952	5.7775	41.3022	5.77417	39.7182
5.78292	47.7924	5.78625	42.3865	5.78437	48.2931	5.78603	142.303	5.78417	41.007	5.78083	39.3405
5.78958	47.4696	5.79292	42.3536	5.79103	48.1038	5.7927	124.238	5.79083	40.6942	5.7875	39.1588
5.79625	47.1568	5.79958	42.2568	5.7977	48.0618	5.79937	108.45	5.7975	40.4234	5.79417	39.6395
5.80292	46.8588	5.80625	42.0723	5.80437	48.4319	5.80603	96.5848	5.80417	40.2465	5.80083	42.17
5.80958	46.577	5.81292	41.7972	5.81103	49.4905	5.8127	89.1814	5.81083	40.2079	5.8075	50.0994
5.81625	46.3033	5.81958	41.4519	5.8177	51.6338	5.81937	86.0639	5.8175	40.39	5.81417	69.7727
5.82292	46.0291	5.82625	41.0681	5.82437	55.6264	5.82603	86.7262	5.82417	41.0089	5.82083	110.276
5.82958	45.7492	5.83292	40.6785	5.83103	62.9654	5.8327	90.529	5.83083	42.5324	5.8275	180.531
5.83625	45.4712	5.83958	40.309	5.8377	76.1542	5.83937	96.8251	5.8375	45.7392	5.83417	284.108
5.84292	45.2161	5.84625	39.9776	5.84437	98.4125	5.84603	105.187	5.84417	51.5938	5.84083	414.674
5.84958	45.0082	5.85292	39.6929	5.85103	132.433	5.8527	115.685	5.85083	60.8764	5.8475	555.566
5.85625	44.8613	5.85958	39.4535	5.8577	178.586	5.85937	129.101	5.8575	73.6899	5.85417	684.183
5.86292	44.7698	5.86625	39.2509	5.86437	233.803	5.86603	147.086	5.86417	89.1404	5.86083	778.729
5.86958	44.7164	5.87292	39.0759	5.87103	291.988	5.8727	172.316	5.87083	105.458	5.8675	824.479
5.87625	44.6758	5.87958	38.9209	5.8777	345.519	5.87937	208.445	5.8775	120.49	5.87417	818.018
5.88292	44.6219	5.88625	38.7807	5.88437	386.943	5.88603	259.266	5.88417	132.244	5.88083	768.236
5.88958	44.5375	5.89292	38.6524	5.89103	410.58	5.8927	326.77	5.89083	139.271	5.8875	692.722
5.89625	44.4231	5.89958	38.5346	5.8977	413.994	5.89937	408.92	5.8975	140.922	5.89417	610.557
5.90292	44.2982	5.90625	38.4259	5.90437	398.593	5.90603	498.843	5.90417	137.486	5.90083	535.388
5.90958	44.1885	5.91292	38.3286	5.91103	368.702	5.9127	586.309	5.91083	130.039	5.9075	472.531
5.91625	44.1117	5.91958	38.2442	5.9177	329.679	5.91937	660.528	5.9175	119.978	5.91417	420.557
5.92292	44.0779	5.92625	38.1751	5.92437	286.415	5.92603	712.658	5.92417	108.559	5.92083	374.992
5.92958	44.0927	5.93292	38.1203	5.93103	242.796	5.9327	737.441	5.93083	96.7588	5.9275	331.679
5.93625	44.1699	5.93958	38.0859	5.9377	201.738	5.93937	734.053	5.9375	85.3872	5.93417	288.572
5.94292	44.3354	5.94625	38.0831	5.94437	165.25	5.94603	705.853	5.94417	75.1286	5.94083	245.916
5.94958	44.6239	5.95292	38.1265	5.95103	134.47	5.9527	658.733	5.95083	66.4473	5.9475	205.4
5.95625	45.0773	5.95958	38.2271	5.9577	109.744	5.95937	598.857	5.9575	59.5002	5.95417	169.037
5.96292	45.7425	5.96625	38.3844	5.96437	90.7574	5.96603	531.276	5.96417	54.1825	5.96083	138.31
5.96958	46.6728	5.97292	38.589	5.97103	76.736	5.9727	459.952	5.97083	50.252	5.9675	113.778
5.97625	47.9264	5.97958	38.8203	5.9777	66.6714	5.97937	388.506	5.9775	47.4343	5.97417	95.1099
5.98292	49.5682	5.98625	39.0544	5.98437	59.5465	5.98603	320.645	5.98417	45.4707	5.98083	81.398
5.98958	51.6686	5.99292	39.2737	5.99103	54.4991	5.9927	259.85	5.99083	44.1399	5.9875	71.5265
5.99625	54.2965	5.99958	39.4835	5.9977	50.8971	5.99937	208.626	5.9975	43.2682	5.99417	64.4627
6.00292	57.4994	6.00625	39.7291	6.00437	48.3313	6.00603	167.943	6.00417	42.7437	6.00083	59.3925
6.00958	61.276	6.01292	40.1134	6.01103	46.5717	6.0127	137.222	6.01083	42.5181	6.0075	55.7446
6.01625	65.5584	6.01958	40.7963	6.0177	45.496	6.01937	114.848	6.0175	42.6068	6.01417	53.1549
6.02292	70.2095	6.02625	41.9812	6.02437	45.0158	6.02603	98.8345	6.02417	43.0632	6.02083	51.4026
6.02958	75.0284	6.03292	43.8871	6.03103	45.0234	6.0327	87.3561	6.03083	43.921	6.0275	50.3383
6.03625	79.7377	6.03958	46.7114	6.0377	45.3634	6.03937	79.0124	6.0375	45.1369	6.03417	49.8233
6.04292	83.9796	6.04625	50.5705	6.04437	45.8384	6.04603	72.8707	6.04417	46.5684	6.04083	49.7112
6.04958	87.3365	6.05292	55.4304	6.05103	46.248	6.0527	68.3703	6.05083	48.0146	6.0475	49.8629
6.05625	89.4046	6.05958	61.0471	6.0577	46.454	6.05937	65.1784	6.0575	49.2835	6.05417	50.1761
6.06292	89.8829	6.06625	66.9403	6.06437	46.4325	6.06603	63.0517	6.06417	50.2515	6.06083	50.6091
6.06958	88.6517	6.07292	72.4554	6.07103	46.2842	6.0727	61.7414	6.07083	50.8924	6.0675	51.1775
6.07625	85.8178	6.07958	76.8924	6.0777	46.1879	6.07937	60.9651	6.0775	51.2695	6.07417	51.9452
6.08292	81.7013	6.08625	79.67	6.08437	46.3352	6.08603	60.4339	6.08417	51.496	6.08083	52.9928
6.08958	76.7875	6.09292	80.4534	6.09103	46.8717	6.0927	59.9132	6.09083	51.6944	6.0875	54.3666
6.09625	71.6419	6.09958	79.2317	6.0977	47.8697	6.09937	59.2966	6.0975	51.9753	6.09417	56.0284
6.10292	66.8421	6.10625	76.3192	6.10437	49.324	6.10603	58.651	6.10417	52.4426	6.10083	57.8256
6.10958	62.9668	6.11292	72.298	6.11103	51.1599	6.1127	58.1965	6.11083	53.1917	6.1075	59.5245
6.11625	60.6236	6.11958	67.9169	6.1177	53.2584	6.11937	58.219	6.1175	54.2898	6.11417	60.8873
6.12292	60.4258	6.12625	64.0063	6.12437	55.4857	6.12603	58.9585	6.12417	55.7494	6.12083	61.7805
6.12958	62.8142	6.13292	61.4038	6.13103	57.7292	6.1327	60.5183	6.13083	57.5314	6.1275	62.2787
6.13625	67.7695	6.13958	60.8211	6.1377	59.9413	6.13937	62.8319	6.1375	59.5942	6.13417	62.7103
6.14292	74.6088	6.14625	62.6116	6.14437	62.202	6.14603	65.6829	6.14417	61.9688	6.14083	63.5695
6.14958	82.0484	6.15292	66.5398	6.15103	64.7054	6.1527	68.7675	6.15083	64.765	6.1475	65.2881
6.15625	88.5224	6.15958	71.733	6.1577	67.6389	6.15937	71.7597	6.1575	68.0528	6.15417	67.9803
6.16292	92.6056	6.16625	76.8986	6.16437	71.0144	6.16603	74.3632	6.16417	71.7063	6.16083	71.3282
6.16958	93.4019	6.17292	80.6856	6.17103	74.5888	6.1727	76.3674	6.17083	75.3551	6.1675	74.6665
6.17625	90.8079	6.17958	82.0608	6.1777	77.9238	6.17937	77.7202	6.1775	78.4888	6.17417	77.1995
6.18292	85.5336	6.18625	80.6036	6.18437	80.5082	6.18603	78.6104	6.18417	80.6193	6.18083	78.2557
6.18958	78.8336	6.19292	76.6449	6.19103	81.8987	6.1927	79.4711	6.19083	81.4123	6.1875	77.5223
6.19625	72.0487	6.19958	71.1441	6.1977	81.8567	6.19937	80.8268	6.1975	80.8005	6.19417	75.1715
6.20292	66.1969	6.20625	65.311	6.20437	80.4515	6.20603	83.0426	6.20417	79.03	6.20083	71.7797
6.20958	61.7976	6.21292	60.1621	6.21103	78.0253	6.2127	86.1292	6.21083	76.5691	6.2075	68.059
6.21625	58.9147	6.21958	56.2472	6.2177	75.0279	6.21937	89.7026	6.2175	73.8816	6.21417	64.5709
6.22292	57.3196	6.22625	53.6308	6.22437	71.8241	6.22603	93.0948	6.22417	71.2228	6.22083	61.5816
6.22958	56.6483	6.23292	52.0501	6.23103	68.5964	6.2327	95.5448	6.23083	68.5935	6.2275	59.0801
6.23625	56.5109	6.23958	51.1131	6.2377	65.3672	6.23937	96.4341	6.2375	65.8531	6.23417	56.8895
6.24292	56.5529	6.24625	50.4508	6.24437	62.089	6.24603	95.5057	6.24417	62.8819	6.24083	54.7962
6.24958	56.4885	6.25292	49.798	6.25103	58.7368	6.2527	92.9437	6.25083	59.6857	6.2475	52.6495
6.25625	56.1266	6.25958	49.0098	6.2577	55.3551	6.25937	89.2529	6.2575	56.4003	6.25417	50.4088
6.26292	55.3799	6.26625	48.0371	6.26437	52.0539	6.26603	85.0096	6.26417	53.2184	6.26083	48.1296
6.26958	54.2622	6.27292	46.895	6.27103	48.974	6.2727	80.6518	6.27083	50.313	6.2675	45.9199
6.27625	52.8617	6.27958	45.6333	6.2777	46.2456	6.27937	76.4112	6.2775	47.7929	6.27417	43.8981
6.28292	51.3058	6.28625	44.3182	6.28437	43.9572	6.28603	72.3681	6.28417	45.7044	6.28083	42.1567
6.28958	49.7289	6.29292	43.0174	6.29103	42.1352	6.2927	68.5444	6.29083	44.0416	6.2875	40.7434
6.29625	48.2445	6.29958	41.7943	6.2977	40.7438	6.29937	64.9724	6.2975	42.7542	6.29417	39.6476
6.30292	46.9275	6.30625	40.7043	6.30437	39.6948	6.30603	61.7156	6.30417	41.7562	6.30083	38.8083
6.30958	45.8045	6.31292	39.7825	6.31103	38.8775	6.3127	58.8527	6.31083	40.9465	6.3075	38.1384
6.31625	44.8599	6.31958	39.0339	6.3177	38.1885	6.31937	56.4413	6.3175	40.2336	6.31417	37.5571
6.32292	44.0574	6.32625	38.4326	6.32437	37.5586	6.32603	54.4953	6.32417	39.5594	6.32083	37.014
6.32958	43.3669	6.33292	37.9372	6.33103	36.9616	6.3327	52.9776	6.33083	38.9051	6.3275	36.49
6.33625	42.7747	6.33958	37.5128	6.3377	36.4037	6.33937	51.8208	6.3375	38.2876	6.33417	35.9931
6.34292	42.2816	6.34625	37.1404	6.34437	35.9073	6.34603	50.9462	6.34417	37.7431	6.34083	35.5496
6.34958	41.9011	6.35292	36.8257	6.35103	35.4958	6.3527	50.2791	6.35083	37.3096	6.3475	35.1992
6.35625	41.6574	6.35958	36.6006	6.3577	35.1796	6.35937	49.7556	6.3575	37.0173	6.35417	34.9841
6.36292	41.5874	6.36625	36.5133	6.36437	34.9541	6.36603	49.3326	6.36417	36.8824	6.36083	34.9426
6.36958	41.7175	6.37292	36.603	6.37103	34.8005	6.3727	48.985	6.37083	36.9024	6.3675	35.0895
6.37625	42.0346	6.37958	36.8595	6.3777	34.6961	6.37937	48.7003	6.3775	37.0507	6.37417	35.408
6.38292	42.4666	6.38625	37.2109	6.38437	34.6251	6.38603	48.4657	6.38417	37.2777	6.38083	35.8405
6.38958	42.901	6.39292	37.5409	6.39103	34.5845	6.3927	48.2702	6.39083	37.5285	6.3875	36.2988
6.39625	43.2196	6.39958	37.7326	6.3977	34.584	6.39937	48.1019	6.3975	37.755	6.39417	36.6812
6.40292	43.3278	6.40625	37.7035	6.40437	34.6365	6.40603	47.9512	6.40417	37.9205	6.40083	36.8953
6.40958	43.1786	6.41292	37.4279	6.41103	34.749	6.4127	47.8034	6.41083	38.002	6.4075	36.881
6.41625	42.7856	6.41958	36.9434	6.4177	34.9069	6.41937	47.6398	6.4175	37.9887	6.41417	36.6302
6.42292	42.2287	6.42625	36.3436	6.42437	35.0733	6.42603	47.4434	6.42417	37.8857	6.42083	36.1862
6.42958	41.6307	6.43292	35.7461	6.43103	35.193	6.4327	47.2088	6.43083	37.7059	6.4275	35.6302
6.43625	41.122	6.43958	35.253	6.4377	35.2106	6.43937	46.9475	6.4375	37.466	6.43417	35.0556
6.44292	40.8382	6.44625	34.9264	6.44437	35.0952	6.44603	46.6876	6.44417	37.189	6.44083	34.5516
6.44958	40.9541	6.45292	34.8115	6.45103	34.8644	6.4527	46.4563	6.45083	36.9096	6.4475	34.1878
6.45625	41.7466	6.45958	34.9822	6.4577	34.585	6.45937	46.2728	6.4575	36.6759	6.45417	34.0123
6.46292	43.6029	6.46625	35.6078	6.46437	34.3471	6.46603	46.1407	6.46417	36.5372	6.46083	34.0543
6.46958	46.9146	6.47292	36.9797	6.47103	34.2441	6.4727	46.0515	6.47083	36.5415	6.4675	34.348
6.47625	51.857	6.47958	39.4621	6.4777	34.3776	6.47937	45.9819	6.4775	36.7522	6.47417	34.9655
6.48292	58.1732	6.48625	43.3311	6.48437	34.894	6.48603	45.9089	6.48417	37.3034	6.48083	36.057
6.48958	65.1126	6.49292	48.5582	6.49103	36.0236	6.4927	45.8283	6.49083	38.4464	6.4875	37.837
6.49625	71.5761	6.49958	54.6732	6.4977	38.063	6.49937	45.7721	6.4975	40.5197	6.49417	40.493
6.50292	76.4141	6.50625	60.8082	6.50437	41.2698	6.50603	45.8102	6.50417	43.7956	6.50083	44.0407
6.50958	78.7511	6.51292	65.9175	6.51103	45.7058	6.5127	46.051	6.51083	48.2764	6.5075	48.234
6.51625	78.2394	6.51958	69.0775	6.5177	51.1346	6.51937	46.6499	6.5175	53.5831	6.51417	52.5889
6.52292	75.1705	6.52625	69.7646	6.52437	57.0331	6.52603	47.7982	6.52417	59.031	6.52083	56.499
6.52958	70.3735	6.53292	68.0285	6.53103	62.6979	6.5327	49.6769	6.53083	63.8313	6.5275	59.3886
6.53625	64.9347	6.53958	64.4827	6.5377	67.3842	6.53937	52.3648	6.5375	67.3046	6.53417	60.8559
6.54292	59.8507	6.54625	60.0853	6.54437	70.4613	6.54603	55.7547	6.54417	69.0336	6.54083	60.7829
6.54958	55.7752	6.55292	55.7895	6.55103	71.5771	6.5527	59.5331	6.55083	68.9502	6.5475	59.3572
6.55625	52.9437	6.55958	52.2485	6.5577	70.7431	6.55937	63.2348	6.5575	67.327	6.55417	56.9739
6.56292	51.2471	6.56625	49.6931	6.56437	68.2921	6.56603	66.3462	6.56417	64.6482	6.56083	54.0838
6.56958	50.374	6.57292	47.9946	6.57103	64.7149	6.5727	68.4247	6.57083	61.4085	6.5675	51.0569
6.57625	49.9396	6.57958	46.8311	6.5777	60.5121	6.57937	69.2077	6.5775	57.9658	6.57417	48.1319
6.58292	49.5925	6.58625	45.857	6.58437	56.1204	6.58603	68.6774	6.58417	54.5216	6.58083	45.4364
6.58958	49.0804	6.59292	44.8217	6.59103	51.8961	6.5927	67.0528	6.59083	51.2052	6.5875	43.0365
6.59625	48.2888	6.59958	43.6187	6.5977	48.1076	6.59937	64.7016	6.5975	48.1439	6.59417	40.9703
6.60292	47.2417	6.60625	42.273	6.60437	44.9185	6.60603	62.0246	6.60417	45.4636	6.60083	39.2561
6.60958	46.0596	6.61292	40.8878	6.61103	42.3799	6.6127	59.3657	6.61083	43.2334	6.6075	37.8852
6.61625	44.8928	6.61958	39.5842	6.6177	40.4515	6.61937	56.9673	6.6175	41.4429	6.61417	36.8204
6.62292	43.8623	6.62625	38.456	6.62437	39.0358	6.62603	54.9655	6.62417	40.0214	6.62083	36.0074
6.62958	43.0303	6.63292	37.5504	6.63103	38.0106	6.6327	53.4019	6.63083	38.887	6.6275	35.3842
6.63625	42.3994	6.63958	36.8657	6.6377	37.2524	6.63937	52.2437	6.6375	37.9691	6.63417	34.8926
6.64292	41.9207	6.64625	36.3626	6.64437	36.643	6.64603	51.4092	6.64417	37.2128	6.64083	34.4849
6.64958	41.5206	6.65292	35.974	6.65103	36.087	6.6527	50.7879	6.65083	36.5744	6.6475	34.1229
6.65625	41.132	6.65958	35.6269	6.6577	35.5277	6.65937	50.2634	6.6575	36.0241	6.65417	33.7811
6.66292	40.7281	6.66625	35.2669	6.66437	34.9531	6.66603	49.7427	6.66417	35.5444	6.66083	33.4444
6.66958	40.3304	6.67292	34.8811	6.67103	34.3823	6.6727	49.18	6.67083	35.1253	6.6675	33.1082
6.67625	40.0062	6.67958	34.5058	6.6777	33.8473	6.67937	48.5759	6.6775	34.76	6.67417	32.7721
6.68292	39.8583	6.68625	34.2193	6.68437	33.3838	6.68603	47.9569	6.68417	34.4539	6.68083	32.4459
6.68958	40.0124	6.69292	34.1358	6.69103	33.031	6.6927	47.3528	6.69083	34.2331	6.6875	32.166
6.69625	40.5779	6.69958	34.3804	6.6977	32.8398	6.69937	46.7849	6.6975	34.1549	6.69417	32.0063
6.70292	41.5893	6.70625	35.0337	6.70437	32.8774	6.70603	46.2685	6.70417	34.2989	6.70083	32.0673
6.70958	42.9592	6.71292	36.0765	6.71103	33.2112	6.7127	45.8107	6.71083	34.7414	6.7075	32.4459
6.71625	44.4822	6.71958	37.3735	6.7177	33.8826	6.71937	45.4211	6.7175	35.5172	6.71417	33.1893
6.72292	45.8922	6.72625	38.7044	6.72437	34.8701	6.72603	45.1269	6.72417	36.5849	6.72083	34.2627
6.72958	46.9327	6.73292	39.8259	6.73103	36.0742	6.7327	44.9901	6.73083	37.8203	6.7275	35.5382
6.73625	47.4186	6.73958	40.5302	6.7377	37.324	6.73937	45.0954	6.7375	39.0377	6.73417	36.818
6.74292	47.2827	6.74625	40.6952	6.74437	38.403	6.74603	45.5108	6.74417	40.0314	6.74083	37.879
6.74958	46.5899	6.75292	40.3142	6.75103	39.103	6.7527	46.2408	6.75083	40.6275	6.7475	38.5265
6.75625	45.507	6.75958	39.495	6.7577	39.2785	6.75937	47.2026	6.7575	40.7267	6.75417	38.6486
6.76292	44.2448	6.76625	38.413	6.76437	38.8937	6.76603	48.2354	6.76417	40.329	6.76083	38.2452
6.76958	42.9859	6.77292	37.2534	6.77103	38.0206	6.7727	49.1381	6.77083	39.5255	6.7675	37.4136
6.77625	41.8491	6.77958	36.159	6.7777	36.8114	6.77937	49.7184	6.7775	38.4607	6.77417	36.3073
6.78292	40.8831	6.78625	35.212	6.78437	35.4524	6.78603	49.8466	6.78417	37.2891	6.78083	35.0933
6.78958	40.0872	6.79292	34.4405	6.79103	34.121	6.7927	49.4928	6.79083	36.1457	6.7875	33.9184
6.79625	39.4397	6.79958	33.8335	6.7977	32.9514	6.79937	48.7323	6.7975	35.1295	6.79417	32.8918
6.80292	38.9085	6.80625	33.3586	6.80437	32.0172	6.80603	47.7157	6.80417	34.3032	6.80083	32.073
6.80958	38.4631	6.81292	32.9757	6.81103	31.3354	6.8127	46.6166	6.81083	33.6876	6.8075	31.4755
6.81625	38.0764	6.81958	32.649	6.8177	30.8776	6.81937	45.5804	6.8175	33.2689	6.81417	31.0793
6.82292	37.7369	6.82625	32.3572	6.82437	30.5877	6.82603	44.6939	6.82417	33.0057	6.82083	30.8361
6.82958	37.4465	6.83292	32.0973	6.83103	30.3979	6.8327	43.982	6.83083	32.8436	6.8275	30.6888
6.83625	37.2229	6.83958	31.8851	6.8377	30.2548	6.83937	43.4194	6.8375	32.7339	6.83417	30.5858
6.84292	37.0898	6.84625	31.7454	6.84437	30.1404	6.84603	42.9573	6.84417	32.6538	6.84083	30.5061
6.84958	37.0655	6.85292	31.7001	6.85103	30.087	6.8527	42.5515	6.85083	32.619	6.8475	30.4646
6.85625	37.1532	6.85958	31.7583	6.8577	30.1676	6.85937	42.1782	6.8575	32.6772	6.85417	30.4985
6.86292	37.333	6.86625	31.909	6.86437	30.4613	6.86603	41.8406	6.86417	32.8813	6.86083	30.6482
6.86958	37.5633	6.87292	32.1183	6.87103	31.0125	6.8727	41.5683	6.87083	33.2565	6.8675	30.9329
6.87625	37.7889	6.87958	32.3386	6.8777	31.7984	6.87937	41.4085	6.8775	33.7796	6.87417	31.3349
6.88292	37.9581	6.88625	32.5232	6.88437	32.7206	6.88603	41.4095	6.88417	34.3828	6.88083	31.8022
6.88958	38.0373	6.89292	32.6414	6.89103	33.6342	6.8927	41.5988	6.89083	34.9727	6.8875	32.2585
6.89625	38.0173	6.89958	32.6815	6.8977	34.3938	6.89937	41.9698	6.8975	35.4581	6.89417	32.6347
6.90292	37.9128	6.90625	32.6514	6.90437	34.904	6.90603	42.4733	6.90417	35.7776	6.90083	32.8927
6.90958	37.7584	6.91292	32.5699	6.91103	35.1462	6.9127	43.0288	6.91083	35.9125	6.9075	33.0329
6.91625	37.6077	6.91958	32.4697	6.9177	35.1748	6.91937	43.5433	6.9175	35.8891	6.91417	33.0806
6.92292	37.5409	6.92625	32.3997	6.92437	35.0804	6.92603	43.9353	6.92417	35.7561	6.92083	33.0715
6.92958	37.6468	6.93292	32.4244	6.93103	34.9545	6.9327	44.158	6.93083	35.5706	6.9275	33.0472
6.93625	37.9934	6.93958	32.6066	6.9377	34.8697	6.93937	44.2033	6.9375	35.3956	6.93417	33.0563
6.94292	38.5952	6.94625	32.9814	6.94437	34.8744	6.94603	44.096	6.94417	35.2983	6.94083	33.1497
6.94958	39.3972	6.95292	33.5288	6.95103	34.9932	6.9527	43.8805	6.95083	35.3398	6.9475	33.3662
6.95625	40.2842	6.95958	34.1735	6.9577	35.223	6.95937	43.6163	6.9575	35.5473	6.95417	33.7152
6.96292	41.1019	6.96625	34.801	6.96437	35.5368	6.96603	43.3798	6.96417	35.8987	6.96083	34.1687
6.96958	41.6951	6.97292	35.2879	6.97103	35.882	6.9727	43.2606	6.97083	36.3255	6.9675	34.6594
6.97625	41.9507	6.97958	35.5358	6.9777	36.1772	6.97937	43.3455	6.9775	36.7236	6.97417	35.0842
6.98292	41.8344	6.98625	35.5048	6.98437	36.3193	6.98603	43.6907	6.98417	36.9806	6.98083	35.326
6.98958	41.3971	6.99292	35.2273	6.99103	36.2082	6.9927	44.2891	6.99083	37.0016	6.9875	35.2912
6.99625	40.7429	6.99958	34.7886	6.9977	35.7885	6.99937	45.0568	6.9975	36.746	6.99417	34.9441
7.00292	39.988	7.00625	34.2875	7.00437	35.079	7.00603	45.8412	7.00417	36.2477	7.00083	34.3237
7.00958	39.2246	7.01292	33.7958	7.01103	34.1806	7.0127	46.4544	7.01083	35.6097	7.0075	33.5431
7.01625	38.5027	7.01958	33.3428	7.0177	33.2646	7.01937	46.7296	7.0175	34.9755	7.01417	32.7678
7.02292	37.838	7.02625	32.9227	7.02437	32.5489	7.02603	46.5775	7.02417	34.5078	7.02083	32.186
7.02958	37.2305	7.03292	32.517	7.03103	32.2614	7.0327	46.0134	7.03083	34.3561	7.0275	31.9586
7.03625	36.6826	7.03958	32.1155	7.0377	32.5832	7.03937	45.1531	7.0375	34.6174	7.03417	32.1693
7.04292	36.211	7.04625	31.7307	7.04437	33.5827	7.04603	44.178	7.04417	35.2931	7.04083	32.7954
7.04958	35.8477	7.05292	31.3935	7.05103	35.1715	7.0527	43.2925	7.05083	36.2759	7.0475	33.7138
7.05625	35.6269	7.05958	31.1403	7.0577	37.1056	7.05937	42.6793	7.0575	37.3745	7.05417	34.7385
7.06292	35.5735	7.06625	30.9939	7.06437	39.0306	7.06603	42.4614	7.06417	38.3582	7.06083	35.666
7.06958	35.686	7.07292	30.9548	7.07103	40.5579	7.0727	42.6807	7.07083	39.0096	7.0675	36.324
7.07625	35.9449	7.07958	31.0059	7.0777	41.369	7.07937	43.2992	7.0775	39.185	7.07417	36.612
7.08292	36.3169	7.08625	31.1213	7.08437	41.3189	7.08603	44.2095	7.08417	38.867	7.08083	36.5272
7.08958	36.757	7.09292	31.2777	7.09103	40.4873	7.0927	45.2604	7.09083	38.177	7.0875	36.1547
7.09625	37.209	7.09958	31.4527	7.0977	39.1426	7.09937	46.2875	7.0975	37.3206	7.09417	35.6236
7.10292	37.6062	7.10625	31.6262	7.10437	37.631	7.10603	47.152	7.10417	36.5009	7.10083	35.048
7.10958	37.8828	7.11292	31.775	7.11103	36.2568	7.1127	47.7724	7.11083	35.8477	7.1075	34.4934
7.11625	37.9829	7.11958	31.867	7.1177	35.1963	7.11937	48.1339	7.1175	35.3928	7.11417	33.9727
7.12292	37.869	7.12625	31.8651	7.12437	34.4787	7.12603	48.2659	7.12417	35.0862	7.12083	33.4606
7.12958	37.529	7.13292	31.7349	7.13103	34.0195	7.1327	48.2016	7.13083	34.831	7.1275	32.9161
7.13625	36.9935	7.13958	31.466	7.1377	33.6928	7.13937	47.9527	7.1375	34.5263	7.13417	32.3024
7.14292	36.3321	7.14625	31.0788	7.14437	33.3924	7.14603	47.502	7.14417	34.1105	7.14083	31.611
7.14958	35.6398	7.15292	30.6244	7.15103	33.0648	7.1527	46.8292	7.15083	33.5846	7.1475	30.8685
7.15625	35.0041	7.15958	30.1638	7.1577	32.7139	7.15937	45.9328	7.1575	33.0052	7.15417	30.1356
7.16292	34.4877	7.16625	29.7518	7.16437	32.3782	7.16603	44.8585	7.16417	32.4612	7.16083	29.4862
7.16958	34.1148	7.17292	29.4194	7.17103	32.1088	7.1727	43.7045	7.17083	32.0396	7.1675	28.9912
7.17625	33.8759	7.17958	29.1686	7.1777	31.9519	7.17937	42.6126	7.1775	31.8069	7.17417	28.7018
7.18292	33.7372	7.18625	28.9812	7.18437	31.9338	7.18603	41.7275	7.18417	31.7926	7.18083	28.635
7.18958	33.6585	7.19292	28.8324	7.19103	32.0535	7.1927	41.1577	7.19083	31.9777	7.1875	28.7657
7.19625	33.6065	7.19958	28.7046	7.1977	32.2714	7.19937	40.9389	7.1975	32.2909	7.19417	29.027
7.20292	33.5588	7.20625	28.5926	7.20437	32.506	7.20603	41.0295	7.20417	32.6214	7.20083	29.3188
7.20958	33.5007	7.21292	28.4953	7.21103	32.6371	7.2127	41.3189	7.21083	32.8422	7.2075	29.5248
7.21625	33.4172	7.21958	28.4066	7.2177	32.5346	7.21937	41.6608	7.2175	32.8431	7.21417	29.5424
7.22292	33.2932	7.22625	28.3127	7.22437	32.1031	7.22603	41.9064	7.22417	32.5623	7.22083	29.3131
7.22958	33.1159	7.23292	28.1954	7.23103	31.3287	7.2327	41.9455	7.23083	32.0096	7.2275	28.8434
7.23625	32.8774	7.23958	28.0366	7.2377	30.2925	7.23937	41.7271	7.2375	31.2691	7.23417	28.2059
7.24292	32.577	7.24625	27.8258	7.24437	29.1562	7.24603	41.2655	7.24417	30.4756	7.24083	27.5216
7.24958	32.2261	7.25292	27.5626	7.25103	28.1167	7.2527	40.6256	7.25083	29.7809	7.2475	26.926
7.25625	31.8465	7.25958	27.2608	7.2577	27.3552	7.25937	39.8989	7.2575	29.315	7.25417	26.5355
7.26292	31.4646	7.26625	26.9446	7.26437	26.9847	7.26603	39.176	7.26417	29.1533	7.26083	26.4149
7.26958	31.1074	7.27292	26.6371	7.27103	27.0238	7.2727	38.5246	7.27083	29.2926	7.2675	26.5589
7.27625	30.7937	7.27958	26.3553	7.2777	27.3914	7.27937	37.9882	7.2775	29.6497	7.27417	26.8955
7.28292	30.5357	7.28625	26.1106	7.28437	27.9274	7.28603	37.5953	7.28417	30.0913	7.28083	27.3066
7.28958	30.3407	7.29292	25.9123	7.29103	28.4405	7.2927	37.3631	7.29083	30.4708	7.2875	27.6632
7.29625	30.2167	7.29958	25.7697	7.2977	28.7561	7.29937	37.2963	7.2975	30.673	7.29417	27.8611
7.30292	30.1647	7.30625	25.691	7.30437	28.7662	7.30603	37.3712	7.30417	30.6354	7.30083	27.8511
7.30958	30.1681	7.31292	25.6739	7.31103	28.45	7.3127	37.5314	7.31083	30.3659	7.3075	27.6456
7.31625	30.1929	7.31958	25.6991	7.3177	27.8754	7.31937	37.6911	7.3175	29.9325	7.31417	27.3027
7.32292	30.1967	7.32625	25.7287	7.32437	27.164	7.32603	37.7517	7.32417	29.4294	7.32083	26.8936
7.32958	30.1428	7.33292	25.7215	7.33103	26.4425	7.3327	37.6291	7.33083	28.9369	7.3275	26.475
7.33625	30.0093	7.33958	25.6462	7.3377	25.8045	7.33937	37.2872	7.3375	28.4963	7.33417	26.0715
7.34292	29.7999	7.34625	25.4955	7.34437	25.2924	7.34603	36.757	7.34417	28.1129	7.34083	25.6796
7.34958	29.5491	7.35292	25.2872	7.35103	24.9009	7.3527	36.129	7.35083	27.7753	7.3475	25.2848
7.35625	29.3097	7.35958	25.0626	7.3577	24.5972	7.35937	35.5196	7.3575	27.4687	7.35417	24.8814
7.36292	29.1328	7.36625	24.8709	7.36437	24.3478	7.36603	35.0304	7.36417	27.1873	7.36083	24.4842
7.36958	29.0508	7.37292	24.7502	7.37103	24.1337	7.3727	34.7223	7.37083	26.9351	7.3675	24.1256
7.37625	29.0723	7.37958	24.7159	7.3777	23.9549	7.37937	34.6112	7.3775	26.7243	7.37417	23.8428
7.38292	29.182	7.38625	24.7612	7.38437	23.8199	7.38603	34.6727	7.38417	26.5675	7.38083	23.6611
7.38958	29.3527	7.39292	24.8685	7.39103	23.7331	7.3927	34.8568	7.39083	26.4688	7.3875	23.5844
7.39625	29.5563	7.39958	25.0173	7.3977	23.6959	7.39937	35.1048	7.3975	26.4263	7.39417	23.6001
7.40292	29.7728	7.40625	25.1927	7.40437	23.7098	7.40603	35.3622	7.40417	26.4397	7.40083	23.6897
7.40958	29.9935	7.41292	25.3882	7.41103	23.787	7.4127	35.5892	7.41083	26.5121	7.4075	23.8395
7.41625	30.2234	7.41958	25.6104	7.4177	23.9506	7.41937	35.7628	7.4175	26.6533	7.41417	24.0393
7.42292	30.4856	7.42625	25.8813	7.42437	24.2376	7.42603	35.8877	7.42417	26.8745	7.42083	24.2791
7.42958	30.8228	7.43292	26.2361	7.43103	24.6854	7.4327	35.9921	7.43083	27.1821	7.4275	24.5433
7.43625	31.2796	7.43958	26.7034	7.4377	25.3077	7.43937	36.1133	7.4375	27.5669	7.43417	24.8032
7.44292	31.8737	7.44625	27.2861	7.44437	26.0715	7.44603	36.2778	7.44417	27.9932	7.44083	25.0206
7.44958	32.5708	7.45292	27.9431	7.45103	26.8888	7.4527	36.4852	7.45083	28.4009	7.4475	25.1541
7.45625	33.2813	7.45958	28.5864	7.4577	27.6322	7.45937	36.7146	7.4575	28.7194	7.45417	25.1722
7.46292	33.8764	7.46625	29.0985	7.46437	28.1625	7.46603	36.9415	7.46417	28.8882	7.46083	25.063
7.46958	34.2236	7.47292	29.3674	7.47103	28.3694	7.4727	37.1599	7.47083	28.8749	7.4675	24.8413
7.47625	34.2307	7.47958	29.3217	7.4777	28.2068	7.47937	37.3907	7.4775	28.6822	7.47417	24.5461
7.48292	33.8726	7.48625	28.9526	7.48437	27.71	7.48603	37.6635	7.48417	28.3465	7.48083	24.2267
7.48958	33.2041	7.49292	28.3203	7.49103	26.9775	7.4927	37.9887	7.49083	27.9231	7.4875	23.9248
7.49625	32.34	7.49958	27.5354	7.4977	26.135	7.49937	38.3363	7.4975	27.4687	7.49417	23.6616
7.50292	31.4178	7.50625	26.7239	7.50437	25.2953	7.50603	38.6252	7.50417	27.0243	7.50083	23.4351
7.50958	30.5581	7.51292	25.9857	7.51103	24.5342	7.5127	38.744	7.51083	26.6094	7.5075	23.2306
7.51625	29.8319	7.51958	25.3773	7.5177	23.8895	7.51937	38.5942	7.5175	26.2308	7.51417	23.0312
7.52292	29.2578	7.52625	24.9071	7.52437	23.366	7.52603	38.1293	7.52417	25.8884	7.52083	22.8291
7.52958	28.8172	7.53292	24.5528	7.53103	22.9492	7.5327	37.3836	7.53083	25.5833	7.5275	22.624
7.53625	28.4739	7.53958	24.2782	7.5377	22.6212	7.53937	36.4652	7.5375	25.3148	7.53417	22.4242
7.54292	28.1892	7.54625	24.0445	7.54437	22.3618	7.54603	35.5182	7.54417	25.0812	7.54083	22.2387
7.54958	27.9303	7.55292	23.8204	7.55103	22.1534	7.5527	34.6742	7.55083	24.8761	7.5475	22.0728
7.55625	27.6728	7.55958	23.5877	7.5577	21.9741	7.55937	34.0142	7.5575	24.6897	7.55417	21.924
7.56292	27.4076	7.56625	23.3417	7.56437	21.8034	7.56603	33.5522	7.56417	24.5113	7.56083	21.7843
7.56958	27.1387	7.57292	23.0918	7.57103	21.6241	7.5727	33.2508	7.57083	24.3349	7.5675	21.6451
7.57625	26.8817	7.57958	22.8567	7.5777	21.4281	7.57937	33.0458	7.5775	24.1594	7.57417	21.5011
7.58292	26.6571	7.58625	22.6569	7.58437	21.2221	7.58603	32.8717	7.58417	23.9878	7.58083	21.3523
7.58958	26.4788	7.59292	22.5048	7.59103	21.0204	7.5927	32.6805	7.59083	23.8271	7.5875	21.2011
7.59625	26.3515	7.59958	22.3999	7.5977	20.8387	7.59937	32.4488	7.5975	23.6816	7.59417	21.0509
7.60292	26.2637	7.60625	22.3279	7.60437	20.6833	7.60603	32.1803	7.60417	23.5505	7.60083	20.9012
7.60958	26.1941	7.61292	22.2654	7.61103	20.5522	7.6127	31.9004	7.61083	23.4299	7.6075	20.7491
7.61625	26.1168	7.61958	22.1872	7.6177	20.4363	7.61937	31.6453	7.6175	23.3126	7.61417	20.5932
7.62292	26.0081	7.62625	22.0733	7.62437	20.3218	7.62603	31.4422	7.62417	23.1934	7.62083	20.4325
7.62958	25.8541	7.63292	21.9173	7.63103	20.1941	7.6327	31.301	7.63083	23.0665	7.6275	20.2665
7.63625	25.6543	7.63958	21.7271	7.6377	20.0424	7.63937	31.2119	7.6375	22.9292	7.63417	20.0977
7.64292	25.424	7.64625	21.5206	7.64437	19.8646	7.64603	31.1484	7.64417	22.7847	7.64083	19.9304
7.64958	25.1884	7.65292	21.3223	7.65103	19.6686	7.6527	31.0788	7.65083	22.6421	7.6475	19.7721
7.65625	24.9734	7.65958	21.1549	7.6577	19.4693	7.65937	30.9792	7.6575	22.5134	7.65417	19.6342
7.66292	24.8046	7.66625	21.0371	7.66437	19.2833	7.66603	30.8418	7.66417	22.4075	7.66083	19.5289
7.66958	24.703	7.67292	20.9813	7.67103	19.1264	7.6727	30.6773	7.67083	22.3279	7.6675	19.4612
7.67625	24.6844	7.67958	20.9947	7.6777	19.0086	7.67937	30.5071	7.6775	22.2759	7.67417	19.4306
7.68292	24.7564	7.68625	21.0767	7.68437	18.9338	7.68603	30.3531	7.68417	22.2502	7.68083	19.434
7.68958	24.9124	7.69292	21.2183	7.69103	18.9033	7.6927	30.2329	7.69083	22.2497	7.6875	19.464
7.69625	25.1288	7.69958	21.3957	7.6977	18.9176	7.69937	30.1533	7.6975	22.2712	7.69417	19.5127
7.70292	25.3644	7.70625	21.5707	7.70437	18.9691	7.70603	30.1151	7.70417	22.3074	7.70083	19.5684
7.70958	25.5656	7.71292	21.698	7.71103	19.0458	7.7127	30.1175	7.71083	22.3465	7.7075	19.6185
7.71625	25.6782	7.71958	21.7352	7.7177	19.1274	7.71937	30.1604	7.7175	22.3708	7.71417	19.6471
7.72292	25.66	7.72625	21.6551	7.72437	19.1889	7.72603	30.242	7.72417	22.3646	7.72083	19.6381
7.72958	25.4936	7.73292	21.4515	7.73103	19.2065	7.7327	30.3483	7.73083	22.316	7.7275	19.5765
7.73625	25.1932	7.73958	21.1468	7.7377	19.1679	7.73937	30.4503	7.7375	22.2225	7.73417	19.454
7.74292	24.8036	7.74625	20.7853	7.74437	19.0778	7.74603	30.509	7.74417	22.0938	7.74083	19.2728
7.74958	24.3835	7.75292	20.421	7.75103	18.9567	7.7527	30.4823	7.75083	21.9502	7.7475	19.0468
7.75625	23.9887	7.75958	20.1001	7.7577	18.8303	7.75937	30.3402	7.7575	21.8096	7.75417	18.7974
7.76292	23.6597	7.76625	19.8531	7.76437	18.7182	7.76603	30.0798	7.76417	21.6837	7.76083	18.5494
7.76958	23.4189	7.77292	19.6948	7.77103	18.6291	7.7727	29.7294	7.77083	21.5759	7.7675	18.3253
7.77625	23.2744	7.77958	19.6247	7.7777	18.5623	7.77937	29.3422	7.7775	21.4853	7.77417	18.1446
7.78292	23.2186	7.78625	19.629	7.78437	18.5089	7.78603	28.9774	7.78417	21.4062	7.78083	18.0197
7.78958	23.2329	7.79292	19.6776	7.79103	18.4536	7.7927	28.6837	7.79083	21.3289	7.7875	17.951
7.79625	23.2863	7.79958	19.7315	7.7977	18.3787	7.79937	28.4886	7.7975	21.2412	7.79417	17.9248
7.80292	23.3412	7.80625	19.7501	7.80437	18.2686	7.80603	28.3923	7.80417	21.1329	7.80083	17.9176
7.80958	23.3579	7.81292	19.7048	7.81103	18.1112	7.8127	28.3732	7.81083	20.998	7.8075	17.9
7.81625	23.3059	7.81958	19.5847	7.8177	17.9057	7.81937	28.3961	7.8175	20.8421	7.81417	17.8485
7.82292	23.1767	7.82625	19.3987	7.82437	17.6625	7.82603	28.4219	7.82417	20.6804	7.82083	17.755
7.82958	22.9831	7.83292	19.1746	7.83103	17.4108	7.8327	28.4142	7.83083	20.5379	7.8275	17.6334
7.83625	22.7537	7.83958	18.9481	7.8377	17.1933	7.83937	28.3494	7.8375	20.443	7.83417	17.5157
7.84292	22.5239	7.84625	18.7492	7.84437	17.0541	7.84603	28.2226	7.84417	20.4167	7.84083	17.436
7.84958	22.3193	7.85292	18.5905	7.85103	17.0174	7.8527	28.0509	7.85083	20.4568	7.8475	17.417
7.85625	22.15	7.85958	18.4636	7.8577	17.0755	7.85937	27.8621	7.8575	20.5359	7.85417	17.4541
7.86292	22.0037	7.86625	18.3492	7.86437	17.1857	7.86603	27.6852	7.86417	20.6118	7.86083	17.5176
7.86958	21.8616	7.87292	18.229	7.87103	17.2887	7.8727	27.5416	7.87083	20.6437	7.8675	17.5633
7.87625	21.7094	7.87958	18.0969	7.8777	17.3364	7.87937	27.4391	7.8775	20.6118	7.87417	17.5562
7.88292	21.5502	7.88625	17.9615	7.88437	17.3135	7.88603	27.3724	7.88417	20.5245	7.88083	17.4885
7.88958	21.4033	7.89292	17.8437	7.89103	17.2448	7.8927	27.3237	7.89083	20.4163	7.8875	17.3845
7.89625	21.297	7.89958	17.766	7.8977	17.1828	7.89937	27.277	7.8975	20.3309	7.89417	17.2906
7.90292	21.2555	7.90625	17.7436	7.90437	17.1781	7.90603	27.2236	7.90417	20.3023	7.90083	17.2486
7.90958	21.2841	7.91292	17.7722	7.91103	17.2548	7.9127	27.1678	7.91083	20.3371	7.9075	17.2791
7.91625	21.3661	7.91958	17.8304	7.9177	17.3969	7.91937	27.122	7.9175	20.4124	7.91417	17.3688
7.92292	21.4643	7.92625	17.8862	7.92437	17.5538	7.92603	27.0987	7.92417	20.4878	7.92083	17.4761
7.92958	21.5349	7.93292	17.911	7.93103	17.6616	7.9327	27.0987	7.93083	20.5188	7.9275	17.5467
7.93625	21.5473	7.93958	17.889	7.9377	17.6721	7.93937	27.1101	7.9375	20.4768	7.93417	17.5352
7.94292	21.4887	7.94625	17.818	7.94437	17.571	7.94603	27.1087	7.94417	20.3609	7.94083	17.4274
7.94958	21.3675	7.95292	17.7073	7.95103	17.3845	7.9527	27.071	7.95083	20.1931	7.9475	17.242
7.95625	21.2064	7.95958	17.5738	7.9577	17.1618	7.95937	26.9818	7.9575	20.0076	7.95417	17.0212
7.96292	21.0333	7.96625	17.4341	7.96437	16.9516	7.96603	26.8412	7.96417	19.8336	7.96083	16.808
7.96958	20.8707	7.97292	17.3025	7.97103	16.7804	7.9727	26.6638	7.97083	19.6838	7.9675	16.6302
7.97625	20.7324	7.97958	17.1838	7.9777	16.6488	7.97937	26.4721	7.9775	19.5551	7.97417	16.4905
7.98292	20.6208	7.98625	17.0784	7.98437	16.5391	7.98603	26.2899	7.98417	19.4349	7.98083	16.3741
7.98958	20.5312	7.99292	16.9835	7.99103	16.428	7.9927	26.1331	7.99083	19.31	7.9875	16.2601
7.99625	20.4544	7.99958	16.8948	7.9977	16.3002	7.99937	26.0043	7.9975	19.1731	7.99417	16.1319
