# Supplementary material for: SIMMER employs similarity algorithms to accurately identify human gut microbiome species and enzymes capable of known chemical transformations
Source: eLife. 2023 Jun 12;12:e82401. doi: 10.7554/eLife.82401 (PMC10289814; doi:10.7554/eLife.82401)
Supplement: Figure 9—source data 1. [file elife-82401-fig9-data1.xlsx]

## Sheet: Figure9
Patient ID	group	DAS28_baseline	DAS28_t4	Difference_DAS28	Age	Gender	Ethnicity	disease duration (months)	Run	Assay Type	AvgSpotLen	Bases	BioProject	BioSample	BioSampleModel	Bytes	Consent	Experiment	Sample Name	SRA Study	number_reads	no. SIMMER hits	normalized no. SIMMER hits
360	R	5.42	2.79	2.63	65	F	HB	2	SRR13436274	WGS	297	4800762781	PRJNA682730	SAMN17006409	MIMS.me,MIGS/MIMS/MIMARKS.human-gut	2217214918	public	SRX9849758	360_metagenome_nextseq	SRP301755	16155624	16	9.90367e-07
411	R	7.6	4.39	3.21	50	F	HW	5	SRR13436262	WGS	298	4690617695	PRJNA682730	SAMN17006420	MIMS.me,MIGS/MIMS/MIMARKS.human-gut	2168770005	public	SRX9849770	411_metagenome_nextseq	SRP301755	15700993	7	4.45832e-07
417	R	6.46	4.64	1.82	62	M	B	6	SRR13436261	WGS	298	4679422333	PRJNA682730	SAMN17006421	MIMS.me,MIGS/MIMS/MIMARKS.human-gut	2175138432	public	SRX9849771	417_metagenome_nextseq	SRP301755	15689640	22	1.4022e-06
263	NR	4.96	3.63	1.33	65	F	AA	6	SRR13436282	WGS	287	4256486397	PRJNA682730	SAMN17006402	MIMS.me,MIGS/MIMS/MIMARKS.human-gut	1977217059	public	SRX9849750	263_metagenome_nextseq	SRP301755	14780337	22	1.48846e-06
334	R	4.13	1.53	2.6	22	F	C	5	SRR13436276	WGS	296	4261536722	PRJNA682730	SAMN17006407	MIMS.me,MIGS/MIMS/MIMARKS.human-gut	1968571874	public	SRX9849756	334_metagenome_nextseq	SRP301755	14362025	9	6.26653e-07
387	R	6.28	1.89	4.39	41	M	HW	2	SRR13436263	WGS	286	3875079090	PRJNA682730	SAMN17006419	MIMS.me,MIGS/MIMS/MIMARKS.human-gut	1695252749	public	SRX9849769	387_metagenome_nextseq	SRP301755	13548869	5	3.69034e-07
485	NR	7.42	6.46	0.96	53	M	HW	3	SRR13436249	WGS	293	3946651399	PRJNA682730	SAMN17006432	MIMS.me,MIGS/MIMS/MIMARKS.human-gut	1886047266	public	SRX9849783	485_metagenome_nextseq	SRP301755	13455661	11	8.175e-07
473	NR	5.42	4.9	0.52	55	M	B	2	SRR13436251	WGS	292	3786189027	PRJNA682730	SAMN17006430	MIMS.me,MIGS/MIMS/MIMARKS.human-gut	1818948383	public	SRX9849781	473_metagenome_nextseq	SRP301755	12949328	5	3.8612e-07
293	NR	5.92	5.66	0.26	60	F	HW	5	SRR13436280	WGS	298	3722157407	PRJNA682730	SAMN17006404	MIMS.me,MIGS/MIMS/MIMARKS.human-gut	1715912594	public	SRX9849752	293_metagenome_nextseq	SRP301755	12454424	51	4.09493e-06
215	R	7.1	2.96	4.14	41	M	HW	2	SRR13436293	WGS	298	3719544688	PRJNA682730	SAMN17006400	MIMS.me,MIGS/MIMS/MIMARKS.human-gut	1722073784	public	SRX9849739	215_metagenome_nextseq	SRP301755	12445784	12	9.64182e-07
88	NR	6.63	5.27	1.36	44	F	H	6	SRR13436255	WGS	297	3650315246	PRJNA682730	SAMN17006391	MIMS.me,MIGS/MIMS/MIMARKS.human-gut	1716160555	public	SRX9849777	88_metagenome_nextseq	SRP301755	12286670	13	1.05806e-06
172	NR	4.83	4.69	0.14	59	F	C	2	SRR13436326	WGS	298	3653158891	PRJNA682730	SAMN17006397	MIMS.me,MIGS/MIMS/MIMARKS.human-gut	1697999674	public	SRX9849706	172_metagenome_nextseq	SRP301755	12247443	21	1.71464e-06
211	R	4.25	2.25	2	33	F	Asian	6	SRR13436304	WGS	297	3564247466	PRJNA682730	SAMN17006399	MIMS.me,MIGS/MIMS/MIMARKS.human-gut	1652508814	public	SRX9849728	211_metagenome_nextseq	SRP301755	11971628	3	2.50592e-07
450	NR	5.32	4.5	0.82	33	F	B	4	SRR13436258	WGS	294	3520015893	PRJNA682730	SAMN17006424	MIMS.me,MIGS/MIMS/MIMARKS.human-gut	1687710018	public	SRX9849774	450_metagenome_nextseq	SRP301755	11944359	9	7.53494e-07
460	R	5.22	2.75	2.47	51	F	Asian	4	SRR13436254	WGS	292	3468940486	PRJNA682730	SAMN17006427	MIMS.me,MIGS/MIMS/MIMARKS.human-gut	1664535116	public	SRX9849778	460_metagenome_nextseq	SRP301755	11846252	25	2.11037e-06
317	R	6.19	0.28	5.91	27	M	H	2	SRR13436278	WGS	298	3517184649	PRJNA682730	SAMN17006406	MIMS.me,MIGS/MIMS/MIMARKS.human-gut	1626061609	public	SRX9849754	317_metagenome_nextseq	SRP301755	11779491	8	6.79146e-07
472	NR	6.54	6.68	-0.14	45	F	Asian	5	SRR13436252	WGS	294	3440550358	PRJNA682730	SAMN17006429	MIMS.me,MIGS/MIMS/MIMARKS.human-gut	1650092622	public	SRX9849780	472_metagenome_nextseq	SRP301755	11678220	41	3.51081e-06
299	NR	5.41	4.48	0.93	31	F	HW	2	SRR13436279	WGS	297	3456605671	PRJNA682730	SAMN17006405	MIMS.me,MIGS/MIMS/MIMARKS.human-gut	1607245787	public	SRX9849753	299_metagenome_nextseq	SRP301755	11601941	29	2.49958e-06
458	R	6.71	2.04	4.67	37	F	H	2	SRR13436256	WGS	295	3317913514	PRJNA682730	SAMN17006426	MIMS.me,MIGS/MIMS/MIMARKS.human-gut	1589403580	public	SRX9849776	458_metagenome_nextseq	SRP301755	11221960	4	3.56444e-07
452	R	4.07	1.97	2.1	26	F	H	2	SRR13436257	WGS	293	3283209374	PRJNA682730	SAMN17006425	MIMS.me,MIGS/MIMS/MIMARKS.human-gut	1567737678	public	SRX9849775	452_metagenome_nextseq	SRP301755	11189253	6	5.36229e-07
283	R	6.9	2.16	4.74	23	F	HW	2	SRR13436281	WGS	298	3326995516	PRJNA682730	SAMN17006403	MIMS.me,MIGS/MIMS/MIMARKS.human-gut	1532057700	public	SRX9849751	283_metagenome_nextseq	SRP301755	11149358	12	1.0763e-06
449	R	5.83	3.55	2.28	27	F	B	3	SRR13436259	WGS	292	3220102402	PRJNA682730	SAMN17006423	MIMS.me,MIGS/MIMS/MIMARKS.human-gut	1540926919	public	SRX9849773	449_metagenome_nextseq	SRP301755	11001033	12	1.09081e-06
222	R	7.36	5	2.36	66	M	H	2	SRR13436283	WGS	299	3231366090	PRJNA682730	SAMN17006401	MIMS.me,MIGS/MIMS/MIMARKS.human-gut	1492880533	public	SRX9849749	222_metagenome_nextseq	SRP301755	10793935	24	2.22347e-06
82	NR	4.62	3.69	0.93	31	F	HW	6	SRR13436266	WGS	297	3205403270	PRJNA682730	SAMN17006390	MIMS.me,MIGS/MIMS/MIMARKS.human-gut	1491776031	public	SRX9849766	82_metagenome_nextseq	SRP301755	10783618	23	2.13286e-06
128	NR	6.25	6.74	-0.49	35	F	H	3	SRR13436273	WGS	292	3099189629	PRJNA682730	SAMN17006410	MIMS.me,MIGS/MIMS/MIMARKS.human-gut	1475186685	public	SRX9849759	128_metagenome_nextseq	SRP301755	10583724	15	1.41727e-06
489	R	4.97	1.41	3.56	43	F	C	2	SRR13436248	WGS	294	3075780645	PRJNA682730	SAMN17006433	MIMS.me,MIGS/MIMS/MIMARKS.human-gut	1468140675	public	SRX9849784	489_metagenome_nextseq	SRP301755	10446424	7	6.70086e-07
429	NR	7.42	5.72	1.7	46	F	HW	2	SRR13436260	WGS	299	3114114931	PRJNA682730	SAMN17006422	MIMS.me,MIGS/MIMS/MIMARKS.human-gut	1450843716	public	SRX9849772	429_metagenome_nextseq	SRP301755	10406513	10	9.60937e-07
483	NR	4.15	3.1	1.05	46	M	HW	2	SRR13436250	WGS	284	2899216397	PRJNA682730	SAMN17006431	MIMS.me,MIGS/MIMS/MIMARKS.human-gut	1391294339	public	SRX9849782	483_metagenome_nextseq	SRP301755	10186786	3	2.94499e-07
170	NR	5.27	6.09	-0.82	33	F	H	6	SRR13436272	WGS	290	2936789155	PRJNA682730	SAMN17006411	MIMS.me,MIGS/MIMS/MIMARKS.human-gut	1404436981	public	SRX9849760	170_metagenome_nextseq	SRP301755	10093352	25	2.47688e-06
90	NR	4.92	3.25	1.67	71	F	HW	3	SRR13436244	WGS	297	2997350045	PRJNA682730	SAMN17006392	MIMS.me,MIGS/MIMS/MIMARKS.human-gut	1397686320	public	SRX9849788	90_metagenome_nextseq	SRP301755	10072664	36	3.57403e-06
126	NR	4.04	3.01	1.03	47	M	HW	2	SRR13436222	WGS	298	2980094879	PRJNA682730	SAMN17006394	MIMS.me,MIGS/MIMS/MIMARKS.human-gut	1395507929	public	SRX9849810	126_metagenome_nextseq	SRP301755	9992351	26	2.60199e-06
356	NR	5.85	4.46	1.39	54	F	H	5	SRR13436270	WGS	298	2975316875	PRJNA682730	SAMN17006413	MIMS.me,MIGS/MIMS/MIMARKS.human-gut	1384701999	public	SRX9849762	356_metagenome_nextseq	SRP301755	9962580	36	3.61352e-06
382	NR	5.91	4.96	0.95	39	F	H	6	SRR13436265	WGS	285	2798881379	PRJNA682730	SAMN17006417	MIMS.me,MIGS/MIMS/MIMARKS.human-gut	1241183476	public	SRX9849767	382_metagenome_nextseq	SRP301755	9788240	6	6.1298e-07
342	NR	6.27	5.5	0.77	56	F	HW	4	SRR13436271	WGS	280	2703817318	PRJNA682730	SAMN17006412	MIMS.me,MIGS/MIMS/MIMARKS.human-gut	1293335998	public	SRX9849761	342_metagenome_nextseq	SRP301755	9634600	12	1.24551e-06
198	NR	7.79	6.1	1.69	62	F	C	3	SRR13436315	WGS	298	2776671617	PRJNA682730	SAMN17006398	MIMS.me,MIGS/MIMS/MIMARKS.human-gut	1294035638	public	SRX9849717	198_metagenome_nextseq	SRP301755	9314445	13	1.39568e-06
462	NR	5.49	5.44	0.05	50	F	WH	3	SRR13436253	WGS	292	2688619659	PRJNA682730	SAMN17006428	MIMS.me,MIGS/MIMS/MIMARKS.human-gut	1295582966	public	SRX9849779	462_metagenome_nextseq	SRP301755	9207312	16	1.73775e-06
378	NR	5.91	5.92	-0.01	46	F	HW	4	SRR13436268	WGS	289	2639090032	PRJNA682730	SAMN17006415	MIMS.me,MIGS/MIMS/MIMARKS.human-gut	1169959552	public	SRX9849764	378_metagenome_nextseq	SRP301755	9115449	36	3.94934e-06
347	R	5.05	3.03	2.02	37	M	HW	2	SRR13436275	WGS	299	2645993977	PRJNA682730	SAMN17006408	MIMS.me,MIGS/MIMS/MIMARKS.human-gut	1224117318	public	SRX9849757	347_metagenome_nextseq	SRP301755	8845459	8	9.04419e-07
72	R	6.31	2.22	4.09	37	F	H	4	SRR13436277	WGS	299	2625812256	PRJNA682730	SAMN17006389	MIMS.me,MIGS/MIMS/MIMARKS.human-gut	1221883053	public	SRX9849755	72_metagenome_nextseq	SRP301755	8774211	23	2.62132e-06
140	NR	4.82	4.64	0.18	23	F	H	2	SRR13436211	WGS	299	2582736765	PRJNA682730	SAMN17006395	MIMS.me,MIGS/MIMS/MIMARKS.human-gut	1199260604	public	SRX9849821	140_metagenome_nextseq	SRP301755	8628433	26	3.01329e-06
380	NR	4.69	3.93	0.76	32	F	H	5	SRR13436267	WGS	291	2442050842	PRJNA682730	SAMN17006416	MIMS.me,MIGS/MIMS/MIMARKS.human-gut	1080893520	public	SRX9849765	380_metagenome_nextseq	SRP301755	8381887	9	1.07374e-06
144	NR	3.87	4.38	-0.51	48	F	HW	2	SRR13436200	WGS	299	2456263505	PRJNA682730	SAMN17006396	MIMS.me,MIGS/MIMS/MIMARKS.human-gut	1147547444	public	SRX9849832	144_metagenome_nextseq	SRP301755	8205333	16	1.94995e-06
384	R	7.23	1.5	5.73	30	F	HW	5	SRR13436264	WGS	287	2273750960	PRJNA682730	SAMN17006418	MIMS.me,MIGS/MIMS/MIMARKS.human-gut	1007654966	public	SRX9849768	384_metagenome_nextseq	SRP301755	7895513	6	7.59925e-07
371	NR	2.67	3.94	-1.27	50	F	C	3	SRR13436269	WGS	287	1996409716	PRJNA682730	SAMN17006414	MIMS.me,MIGS/MIMS/MIMARKS.human-gut	880574604	public	SRX9849763	371_metagenome_nextseq	SRP301755	6952857	13	1.86973e-06
5	NR	6.45	3.64	2.81	28	F	H	5	SRR13436223	WGS	525	1294655553	PRJNA682730	SAMN17006456	MIMS.me,MIGS/MIMS/MIMARKS.human-gut	819962017	public	SRX9849809	5_metagenome_MiSeq	SRP301755	2462110	10	4.06156e-06
