# Supplementary material for: SIMMER employs similarity algorithms to accurately identify human gut microbiome species and enzymes capable of known chemical transformations
Source: eLife. 2023 Jun 12;12:e82401. doi: 10.7554/eLife.82401 (PMC10289814; doi:10.7554/eLife.82401)
Supplement: Figure 10—source data 1. [file elife-82401-fig10-data1.xlsx]

## Sheet: Sheet1
Sheet	Contents
Figure 10A	SIMMER species predictions overlap with 16S results from twenty healthy human donors
Figure 10B	SIMMER enzyme predictions mapped to shotgun sequencing reads from 28 dexamethasone-metabolizing healthy human donors
Figure10-figure supplement 1	desAB sequences mapped to shotgun sequencing reads from 28 dexamethasone-metabolizing healthy human donors
Javdan_PD_mgx	SIMMER enzyme predictions mapped to shotgun sequencing reads from one metabolizing healthy human donor

## Sheet: Figure 10A
Metabolizer Status	Number of genomes with SIMMER hit	Genomes	DM		DM	Drug	Donia matching metabolite	SIMMER EC	SIMMER EC index	Reactions	t statistic	p_value
1	8	['k__Bacteria;p__Bacteroidetes;c__Bacteroidia;o__Bacteroidales;f__Bacteroidaceae;g__Bacteroides;s__caccae', 'k__Bacteria;p__Bacteroidetes;c__Bacteroidia;o__Bacteroidales;f__Bacteroidaceae;g__Bacteroides;s__ovatus', 'k__Bacteria;p__Bacteroidetes;c__Bacteroidia;o__Bacteroidales;f__Bacteroidaceae;g__Bacteroides;s__uniformis', 'k__Bacteria;p__Bacteroidetes;c__Bacteroidia;o__Bacteroidales;f__Porphyrom…	DM6		DM6	capecitabine	capecitabine M1	3.1.3.108	10	1	0.527431	0.0168545
1	7	['k__Bacteria;p__Bacteroidetes;c__Bacteroidia;o__Bacteroidales;f__Bacteroidaceae;g__Bacteroides;s__eggerthii', 'k__Bacteria;p__Bacteroidetes;c__Bacteroidia;o__Bacteroidales;f__Bacteroidaceae;g__Bacteroides;s__fragilis', 'k__Bacteria;p__Bacteroidetes;c__Bacteroidia;o__Bacteroidales;f__Bacteroidaceae;g__Bacteroides;s__ovatus', 'k__Bacteria;p__Bacteroidetes;c__Bacteroidia;o__Bacteroidales;f__Bactero…	DM6		DM79	misoprostol	misoprostol M7	3.1.4.39	42	1-20	-0.177332	0.454493
1	8	['k__Bacteria;p__Bacteroidetes;c__Bacteroidia;o__Bacteroidales;f__Bacteroidaceae;g__Bacteroides;s__caccae', 'k__Bacteria;p__Bacteroidetes;c__Bacteroidia;o__Bacteroidales;f__Bacteroidaceae;g__Bacteroides;s__fragilis', 'k__Bacteria;p__Bacteroidetes;c__Bacteroidia;o__Bacteroidales;f__Bacteroidaceae;g__Bacteroides;s__ovatus', 'k__Bacteria;p__Bacteroidetes;c__Bacteroidia;o__Bacteroidales;f__Bacteroida…	DM6		DM82	nicardipine	nicardipine M2	5.4.99.18	2	1-6	0.450749	0.0460885
1	7	['k__Bacteria;p__Bacteroidetes;c__Bacteroidia;o__Bacteroidales;f__Bacteroidaceae;g__Bacteroides;s__caccae', 'k__Bacteria;p__Bacteroidetes;c__Bacteroidia;o__Bacteroidales;f__Bacteroidaceae;g__Bacteroides;s__fragilis', 'k__Bacteria;p__Bacteroidetes;c__Bacteroidia;o__Bacteroidales;f__Bacteroidaceae;g__Bacteroides;s__ovatus', 'k__Bacteria;p__Bacteroidetes;c__Bacteroidia;o__Bacteroidales;f__Bacteroida…	DM6		DM99	risperidone	risperidone M2	no EC prediction	62	1-20	0.50306	0.0237633
1	8	['k__Bacteria;p__Bacteroidetes;c__Bacteroidia;o__Bacteroidales;f__Bacteroidaceae;g__Bacteroides;s__caccae', 'k__Bacteria;p__Bacteroidetes;c__Bacteroidia;o__Bacteroidales;f__Bacteroidaceae;g__Bacteroides;s__ovatus', 'k__Bacteria;p__Bacteroidetes;c__Bacteroidia;o__Bacteroidales;f__Bacteroidaceae;g__Bacteroides;s__uniformis', 'k__Bacteria;p__Bacteroidetes;c__Bacteroidia;o__Bacteroidales;f__Porphyrom…	DM6		DM101	spironolactone	spironolactone M1	3.1.1.49		1-9	0.577238	0.00770011
1	8	['k__Bacteria;p__Bacteroidetes;c__Bacteroidia;o__Bacteroidales;f__Bacteroidaceae;g__Bacteroides;s__caccae', 'k__Bacteria;p__Bacteroidetes;c__Bacteroidia;o__Bacteroidales;f__Bacteroidaceae;g__Bacteroides;s__eggerthii', 'k__Bacteria;p__Bacteroidetes;c__Bacteroidia;o__Bacteroidales;f__Bacteroidaceae;g__Bacteroides;s__fragilis', 'k__Bacteria;p__Bacteroidetes;c__Bacteroidia;o__Bacteroidales;f__Bactero…	DM6		DM107	tolcapone	tolcapone M1	1.13.11.43	4	1	0.580506	0.00728327
0	7	['k__Bacteria;p__Bacteroidetes;c__Bacteroidia;o__Bacteroidales;f__Bacteroidaceae;g__Bacteroides;s__eggerthii', 'k__Bacteria;p__Bacteroidetes;c__Bacteroidia;o__Bacteroidales;f__Bacteroidaceae;g__Bacteroides;s__fragilis', 'k__Bacteria;p__Bacteroidetes;c__Bacteroidia;o__Bacteroidales;f__Bacteroidaceae;g__Bacteroides;s__ovatus', 'k__Bacteria;p__Bacteroidetes;c__Bacteroidia;o__Bacteroidales;f__Bactero…	DM6
0	6	['k__Bacteria;p__Bacteroidetes;c__Bacteroidia;o__Bacteroidales;f__Bacteroidaceae;g__Bacteroides;s__caccae', 'k__Bacteria;p__Bacteroidetes;c__Bacteroidia;o__Bacteroidales;f__Bacteroidaceae;g__Bacteroides;s__ovatus', 'k__Bacteria;p__Bacteroidetes;c__Bacteroidia;o__Bacteroidales;f__Bacteroidaceae;g__Bacteroides;s__uniformis', 'k__Bacteria;p__Firmicutes;c__Clostridia;o__Clostridiales;f__Clostridiacea…	DM6
0	6	['k__Bacteria;p__Bacteroidetes;c__Bacteroidia;o__Bacteroidales;f__Bacteroidaceae;g__Bacteroides;s__caccae', 'k__Bacteria;p__Bacteroidetes;c__Bacteroidia;o__Bacteroidales;f__Bacteroidaceae;g__Bacteroides;s__ovatus', 'k__Bacteria;p__Bacteroidetes;c__Bacteroidia;o__Bacteroidales;f__Bacteroidaceae;g__Bacteroides;s__uniformis', 'k__Bacteria;p__Bacteroidetes;c__Bacteroidia;o__Bacteroidales;f__Porphyrom…	DM6
0	6	['k__Bacteria;p__Bacteroidetes;c__Bacteroidia;o__Bacteroidales;f__Bacteroidaceae;g__Bacteroides;s__ovatus', 'k__Bacteria;p__Bacteroidetes;c__Bacteroidia;o__Bacteroidales;f__Bacteroidaceae;g__Bacteroides;s__uniformis', 'k__Bacteria;p__Bacteroidetes;c__Bacteroidia;o__Bacteroidales;f__Rikenellaceae;g__Alistipes;s__putredinis', 'k__Bacteria;p__Firmicutes;c__Clostridia;o__Clostridiales;f__Lachnospirac…	DM6
0	8	['k__Bacteria;p__Actinobacteria;c__Actinobacteria;o__Bifidobacteriales;f__Bifidobacteriaceae;g__Bifidobacterium;s__bifidum', 'k__Bacteria;p__Bacteroidetes;c__Bacteroidia;o__Bacteroidales;f__Bacteroidaceae;g__Bacteroides;s__fragilis', 'k__Bacteria;p__Bacteroidetes;c__Bacteroidia;o__Bacteroidales;f__Bacteroidaceae;g__Bacteroides;s__ovatus', 'k__Bacteria;p__Bacteroidetes;c__Bacteroidia;o__Bacteroida…	DM6
0	6	['k__Bacteria;p__Actinobacteria;c__Actinobacteria;o__Bifidobacteriales;f__Bifidobacteriaceae;g__Bifidobacterium;s__bifidum', 'k__Bacteria;p__Bacteroidetes;c__Bacteroidia;o__Bacteroidales;f__Bacteroidaceae;g__Bacteroides;s__caccae', 'k__Bacteria;p__Bacteroidetes;c__Bacteroidia;o__Bacteroidales;f__Bacteroidaceae;g__Bacteroides;s__ovatus', 'k__Bacteria;p__Bacteroidetes;c__Bacteroidia;o__Bacteroidale…	DM6
0	6	['k__Bacteria;p__Actinobacteria;c__Actinobacteria;o__Bifidobacteriales;f__Bifidobacteriaceae;g__Bifidobacterium;s__bifidum', 'k__Bacteria;p__Bacteroidetes;c__Bacteroidia;o__Bacteroidales;f__Bacteroidaceae;g__Bacteroides;s__ovatus', 'k__Bacteria;p__Bacteroidetes;c__Bacteroidia;o__Bacteroidales;f__Bacteroidaceae;g__Bacteroides;s__uniformis', 'k__Bacteria;p__Bacteroidetes;c__Bacteroidia;o__Bacteroid…	DM6
0	6	['k__Bacteria;p__Actinobacteria;c__Actinobacteria;o__Bifidobacteriales;f__Bifidobacteriaceae;g__Bifidobacterium;s__bifidum', 'k__Bacteria;p__Bacteroidetes;c__Bacteroidia;o__Bacteroidales;f__Bacteroidaceae;g__Bacteroides;s__caccae', 'k__Bacteria;p__Bacteroidetes;c__Bacteroidia;o__Bacteroidales;f__Bacteroidaceae;g__Bacteroides;s__fragilis', 'k__Bacteria;p__Bacteroidetes;c__Bacteroidia;o__Bacteroida…	DM6
0	4	['k__Bacteria;p__Bacteroidetes;c__Bacteroidia;o__Bacteroidales;f__Bacteroidaceae;g__Bacteroides;s__caccae', 'k__Bacteria;p__Bacteroidetes;c__Bacteroidia;o__Bacteroidales;f__Bacteroidaceae;g__Bacteroides;s__ovatus', 'k__Bacteria;p__Bacteroidetes;c__Bacteroidia;o__Bacteroidales;f__Bacteroidaceae;g__Bacteroides;s__uniformis', 'k__Bacteria;p__Firmicutes;c__Clostridia;o__Clostridiales;f__Ruminococcace…	DM6
0	7	['k__Bacteria;p__Bacteroidetes;c__Bacteroidia;o__Bacteroidales;f__Bacteroidaceae;g__Bacteroides;s__caccae', 'k__Bacteria;p__Bacteroidetes;c__Bacteroidia;o__Bacteroidales;f__Bacteroidaceae;g__Bacteroides;s__ovatus', 'k__Bacteria;p__Bacteroidetes;c__Bacteroidia;o__Bacteroidales;f__Bacteroidaceae;g__Bacteroides;s__uniformis', 'k__Bacteria;p__Bacteroidetes;c__Bacteroidia;o__Bacteroidales;f__Porphyrom…	DM6
0	8	['k__Bacteria;p__Bacteroidetes;c__Bacteroidia;o__Bacteroidales;f__Bacteroidaceae;g__Bacteroides;s__fragilis', 'k__Bacteria;p__Bacteroidetes;c__Bacteroidia;o__Bacteroidales;f__Bacteroidaceae;g__Bacteroides;s__ovatus', 'k__Bacteria;p__Bacteroidetes;c__Bacteroidia;o__Bacteroidales;f__Bacteroidaceae;g__Bacteroides;s__uniformis', 'k__Bacteria;p__Bacteroidetes;c__Bacteroidia;o__Bacteroidales;f__Porphyr…	DM6
0	7	['k__Bacteria;p__Bacteroidetes;c__Bacteroidia;o__Bacteroidales;f__Bacteroidaceae;g__Bacteroides;s__caccae', 'k__Bacteria;p__Bacteroidetes;c__Bacteroidia;o__Bacteroidales;f__Bacteroidaceae;g__Bacteroides;s__ovatus', 'k__Bacteria;p__Bacteroidetes;c__Bacteroidia;o__Bacteroidales;f__Bacteroidaceae;g__Bacteroides;s__uniformis', 'k__Bacteria;p__Bacteroidetes;c__Bacteroidia;o__Bacteroidales;f__Porphyrom…	DM6
0	7	['k__Bacteria;p__Actinobacteria;c__Actinobacteria;o__Bifidobacteriales;f__Bifidobacteriaceae;g__Bifidobacterium;s__bifidum', 'k__Bacteria;p__Bacteroidetes;c__Bacteroidia;o__Bacteroidales;f__Bacteroidaceae;g__Bacteroides;s__caccae', 'k__Bacteria;p__Bacteroidetes;c__Bacteroidia;o__Bacteroidales;f__Bacteroidaceae;g__Bacteroides;s__fragilis', 'k__Bacteria;p__Bacteroidetes;c__Bacteroidia;o__Bacteroida…	DM6
0	7	['k__Bacteria;p__Bacteroidetes;c__Bacteroidia;o__Bacteroidales;f__Bacteroidaceae;g__Bacteroides;s__caccae', 'k__Bacteria;p__Bacteroidetes;c__Bacteroidia;o__Bacteroidales;f__Bacteroidaceae;g__Bacteroides;s__fragilis', 'k__Bacteria;p__Bacteroidetes;c__Bacteroidia;o__Bacteroidales;f__Bacteroidaceae;g__Bacteroides;s__ovatus', 'k__Bacteria;p__Bacteroidetes;c__Bacteroidia;o__Bacteroidales;f__Bacteroida…	DM6
1	7	['k__Bacteria;p__Actinobacteria;c__Coriobacteriia;o__Coriobacteriales;f__Coriobacteriaceae;g__Collinsella;s__aerofaciens', 'k__Bacteria;p__Bacteroidetes;c__Bacteroidia;o__Bacteroidales;f__Bacteroidaceae;g__Bacteroides;s__fragilis', 'k__Bacteria;p__Bacteroidetes;c__Bacteroidia;o__Bacteroidales;f__Bacteroidaceae;g__Bacteroides;s__uniformis', 'k__Bacteria;p__Bacteroidetes;c__Bacteroidia;o__Bacteroid…	DM79
1	8	['k__Bacteria;p__Actinobacteria;c__Actinobacteria;o__Bifidobacteriales;f__Bifidobacteriaceae;g__Bifidobacterium;s__adolescentis', 'k__Bacteria;p__Actinobacteria;c__Coriobacteriia;o__Coriobacteriales;f__Coriobacteriaceae;g__Collinsella;s__aerofaciens', 'k__Bacteria;p__Bacteroidetes;c__Bacteroidia;o__Bacteroidales;f__Bacteroidaceae;g__Bacteroides;s__fragilis', 'k__Bacteria;p__Bacteroidetes;c__Bacte…	DM79
1	7	['k__Bacteria;p__Bacteroidetes;c__Bacteroidia;o__Bacteroidales;f__Bacteroidaceae;g__Bacteroides;s__eggerthii', 'k__Bacteria;p__Bacteroidetes;c__Bacteroidia;o__Bacteroidales;f__Bacteroidaceae;g__Bacteroides;s__fragilis', 'k__Bacteria;p__Bacteroidetes;c__Bacteroidia;o__Bacteroidales;f__Bacteroidaceae;g__Bacteroides;s__uniformis', 'k__Bacteria;p__Firmicutes;c__Bacilli;o__Lactobacillales;f__Streptoco…	DM79
1	5	['k__Bacteria;p__Bacteroidetes;c__Bacteroidia;o__Bacteroidales;f__Bacteroidaceae;g__Bacteroides;s__uniformis', 'k__Bacteria;p__Firmicutes;c__Bacilli;o__Lactobacillales;f__Streptococcaceae;g__Streptococcus;s__anginosus', 'k__Bacteria;p__Firmicutes;c__Clostridia;o__Clostridiales;f__Lachnospiraceae;g__Clostridium;s__clostridioforme', 'k__Bacteria;p__Firmicutes;c__Clostridia;o__Clostridiales;f__Lachn…	DM79
0	9	['k__Bacteria;p__Actinobacteria;c__Actinobacteria;o__Bifidobacteriales;f__Bifidobacteriaceae;g__Bifidobacterium;s__adolescentis', 'k__Bacteria;p__Actinobacteria;c__Coriobacteriia;o__Coriobacteriales;f__Coriobacteriaceae;g__Collinsella;s__aerofaciens', 'k__Bacteria;p__Bacteroidetes;c__Bacteroidia;o__Bacteroidales;f__Bacteroidaceae;g__Bacteroides;s__uniformis', 'k__Bacteria;p__Firmicutes;c__Clostri…	DM79
0	5	['k__Bacteria;p__Actinobacteria;c__Actinobacteria;o__Bifidobacteriales;f__Bifidobacteriaceae;g__Bifidobacterium;s__thermacidophilum', 'k__Bacteria;p__Actinobacteria;c__Coriobacteriia;o__Coriobacteriales;f__Coriobacteriaceae;g__Collinsella;s__aerofaciens', 'k__Bacteria;p__Bacteroidetes;c__Bacteroidia;o__Bacteroidales;f__Bacteroidaceae;g__Bacteroides;s__uniformis', 'k__Bacteria;p__Firmicutes;c__Clo…	DM79
0	7	['k__Bacteria;p__Actinobacteria;c__Actinobacteria;o__Bifidobacteriales;f__Bifidobacteriaceae;g__Bifidobacterium;s__adolescentis', 'k__Bacteria;p__Actinobacteria;c__Coriobacteriia;o__Coriobacteriales;f__Coriobacteriaceae;g__Collinsella;s__aerofaciens', 'k__Bacteria;p__Bacteroidetes;c__Bacteroidia;o__Bacteroidales;f__Bacteroidaceae;g__Bacteroides;s__uniformis', 'k__Bacteria;p__Bacteroidetes;c__Bact…	DM79
0	7	['k__Bacteria;p__Actinobacteria;c__Actinobacteria;o__Bifidobacteriales;f__Bifidobacteriaceae;g__Bifidobacterium;s__adolescentis', 'k__Bacteria;p__Actinobacteria;c__Coriobacteriia;o__Coriobacteriales;f__Coriobacteriaceae;g__Collinsella;s__aerofaciens', 'k__Bacteria;p__Bacteroidetes;c__Bacteroidia;o__Bacteroidales;f__Bacteroidaceae;g__Bacteroides;s__uniformis', 'k__Bacteria;p__Bacteroidetes;c__Bact…	DM79
0	9	['k__Bacteria;p__Actinobacteria;c__Actinobacteria;o__Bifidobacteriales;f__Bifidobacteriaceae;g__Bifidobacterium;s__adolescentis', 'k__Bacteria;p__Actinobacteria;c__Coriobacteriia;o__Coriobacteriales;f__Coriobacteriaceae;g__Collinsella;s__aerofaciens', 'k__Bacteria;p__Bacteroidetes;c__Bacteroidia;o__Bacteroidales;f__Bacteroidaceae;g__Bacteroides;s__fragilis', 'k__Bacteria;p__Bacteroidetes;c__Bacte…	DM79
0	8	['k__Bacteria;p__Actinobacteria;c__Actinobacteria;o__Bifidobacteriales;f__Bifidobacteriaceae;g__Bifidobacterium;s__adolescentis', 'k__Bacteria;p__Actinobacteria;c__Coriobacteriia;o__Coriobacteriales;f__Coriobacteriaceae;g__Collinsella;s__aerofaciens', 'k__Bacteria;p__Bacteroidetes;c__Bacteroidia;o__Bacteroidales;f__Bacteroidaceae;g__Bacteroides;s__eggerthii', 'k__Bacteria;p__Bacteroidetes;c__Bact…	DM79
0	9	['k__Bacteria;p__Actinobacteria;c__Actinobacteria;o__Bifidobacteriales;f__Bifidobacteriaceae;g__Bifidobacterium;s__adolescentis', 'k__Bacteria;p__Bacteroidetes;c__Bacteroidia;o__Bacteroidales;f__Bacteroidaceae;g__Bacteroides;s__uniformis', 'k__Bacteria;p__Bacteroidetes;c__Bacteroidia;o__Bacteroidales;f__Rikenellaceae;g__Alistipes;s__onderdonkii', 'k__Bacteria;p__Firmicutes;c__Bacilli;o__Lactobaci…	DM79
0	6	['k__Bacteria;p__Actinobacteria;c__Actinobacteria;o__Bifidobacteriales;f__Bifidobacteriaceae;g__Bifidobacterium;s__adolescentis', 'k__Bacteria;p__Actinobacteria;c__Actinobacteria;o__Bifidobacteriales;f__Bifidobacteriaceae;g__Bifidobacterium;s__thermacidophilum', 'k__Bacteria;p__Bacteroidetes;c__Bacteroidia;o__Bacteroidales;f__Bacteroidaceae;g__Bacteroides;s__fragilis', 'k__Bacteria;p__Bacteroidet…	DM79
0	7	['k__Bacteria;p__Actinobacteria;c__Actinobacteria;o__Bifidobacteriales;f__Bifidobacteriaceae;g__Bifidobacterium;s__adolescentis', 'k__Bacteria;p__Actinobacteria;c__Coriobacteriia;o__Coriobacteriales;f__Coriobacteriaceae;g__Collinsella;s__aerofaciens', 'k__Bacteria;p__Bacteroidetes;c__Bacteroidia;o__Bacteroidales;f__Bacteroidaceae;g__Bacteroides;s__uniformis', 'k__Bacteria;p__Firmicutes;c__Bacilli…	DM79
0	6	['k__Bacteria;p__Bacteroidetes;c__Bacteroidia;o__Bacteroidales;f__Bacteroidaceae;g__Bacteroides;s__uniformis', 'k__Bacteria;p__Bacteroidetes;c__Bacteroidia;o__Bacteroidales;f__Rikenellaceae;g__Alistipes;s__onderdonkii', 'k__Bacteria;p__Firmicutes;c__Bacilli;o__Lactobacillales;f__Streptococcaceae;g__Streptococcus;s__anginosus', 'k__Bacteria;p__Firmicutes;c__Clostridia;o__Clostridiales;f__Ruminococ…	DM79
0	10	['k__Bacteria;p__Actinobacteria;c__Actinobacteria;o__Bifidobacteriales;f__Bifidobacteriaceae;g__Bifidobacterium;s__adolescentis', 'k__Bacteria;p__Bacteroidetes;c__Bacteroidia;o__Bacteroidales;f__Bacteroidaceae;g__Bacteroides;s__fragilis', 'k__Bacteria;p__Bacteroidetes;c__Bacteroidia;o__Bacteroidales;f__Bacteroidaceae;g__Bacteroides;s__uniformis', 'k__Bacteria;p__Bacteroidetes;c__Bacteroidia;o__Ba…	DM79
0	6	['k__Bacteria;p__Bacteroidetes;c__Bacteroidia;o__Bacteroidales;f__Bacteroidaceae;g__Bacteroides;s__uniformis', 'k__Bacteria;p__Firmicutes;c__Clostridia;o__Clostridiales;f__Clostridiaceae;g__Clostridium;s__butyricum', 'k__Bacteria;p__Firmicutes;c__Clostridia;o__Clostridiales;f__Lachnospiraceae;g__Blautia;s__producta', 'k__Bacteria;p__Firmicutes;c__Clostridia;o__Clostridiales;f__Lachnospiraceae;g__…	DM79
0	8	['k__Bacteria;p__Actinobacteria;c__Coriobacteriia;o__Coriobacteriales;f__Coriobacteriaceae;g__Collinsella;s__aerofaciens', 'k__Bacteria;p__Bacteroidetes;c__Bacteroidia;o__Bacteroidales;f__Bacteroidaceae;g__Bacteroides;s__uniformis', 'k__Bacteria;p__Bacteroidetes;c__Bacteroidia;o__Bacteroidales;f__Rikenellaceae;g__Alistipes;s__putredinis', 'k__Bacteria;p__Firmicutes;c__Clostridia;o__Clostridiales;…	DM79
0	5	['k__Bacteria;p__Actinobacteria;c__Coriobacteriia;o__Coriobacteriales;f__Coriobacteriaceae;g__Collinsella;s__aerofaciens', 'k__Bacteria;p__Bacteroidetes;c__Bacteroidia;o__Bacteroidales;f__Bacteroidaceae;g__Bacteroides;s__fragilis', 'k__Bacteria;p__Bacteroidetes;c__Bacteroidia;o__Bacteroidales;f__Bacteroidaceae;g__Bacteroides;s__uniformis', 'k__Bacteria;p__Firmicutes;c__Clostridia;o__Clostridiales…	DM79
0	8	['k__Bacteria;p__Actinobacteria;c__Actinobacteria;o__Bifidobacteriales;f__Bifidobacteriaceae;g__Bifidobacterium;s__adolescentis', 'k__Bacteria;p__Actinobacteria;c__Coriobacteriia;o__Coriobacteriales;f__Coriobacteriaceae;g__Collinsella;s__aerofaciens', 'k__Bacteria;p__Bacteroidetes;c__Bacteroidia;o__Bacteroidales;f__Bacteroidaceae;g__Bacteroides;s__eggerthii', 'k__Bacteria;p__Bacteroidetes;c__Bact…	DM79
0	8	['k__Bacteria;p__Actinobacteria;c__Actinobacteria;o__Bifidobacteriales;f__Bifidobacteriaceae;g__Bifidobacterium;s__adolescentis', 'k__Bacteria;p__Actinobacteria;c__Coriobacteriia;o__Coriobacteriales;f__Coriobacteriaceae;g__Collinsella;s__aerofaciens', 'k__Bacteria;p__Bacteroidetes;c__Bacteroidia;o__Bacteroidales;f__Bacteroidaceae;g__Bacteroides;s__fragilis', 'k__Bacteria;p__Bacteroidetes;c__Bacte…	DM79
1	14	['k__Bacteria;p__Actinobacteria;c__Coriobacteriia;o__Coriobacteriales;f__Coriobacteriaceae;g__Collinsella;s__aerofaciens', 'k__Bacteria;p__Bacteroidetes;c__Bacteroidia;o__Bacteroidales;f__Bacteroidaceae;g__Bacteroides;s__caccae', 'k__Bacteria;p__Bacteroidetes;c__Bacteroidia;o__Bacteroidales;f__Bacteroidaceae;g__Bacteroides;s__ovatus', 'k__Bacteria;p__Bacteroidetes;c__Bacteroidia;o__Bacteroidales;…	DM82
1	12	['k__Bacteria;p__Actinobacteria;c__Actinobacteria;o__Bifidobacteriales;f__Bifidobacteriaceae;g__Bifidobacterium;s__adolescentis', 'k__Bacteria;p__Actinobacteria;c__Coriobacteriia;o__Coriobacteriales;f__Coriobacteriaceae;g__Collinsella;s__aerofaciens', 'k__Bacteria;p__Bacteroidetes;c__Bacteroidia;o__Bacteroidales;f__Bacteroidaceae;g__Bacteroides;s__caccae', 'k__Bacteria;p__Bacteroidetes;c__Bactero…	DM82
1	13	['k__Bacteria;p__Actinobacteria;c__Actinobacteria;o__Bifidobacteriales;f__Bifidobacteriaceae;g__Bifidobacterium;s__thermacidophilum', 'k__Bacteria;p__Actinobacteria;c__Coriobacteriia;o__Coriobacteriales;f__Coriobacteriaceae;g__Collinsella;s__aerofaciens', 'k__Bacteria;p__Actinobacteria;c__Coriobacteriia;o__Coriobacteriales;f__Coriobacteriaceae;g__Eggerthella;s__lenta', 'k__Bacteria;p__Bacteroidet…	DM82
1	16	['k__Bacteria;p__Actinobacteria;c__Actinobacteria;o__Bifidobacteriales;f__Bifidobacteriaceae;g__Bifidobacterium;s__adolescentis', 'k__Bacteria;p__Actinobacteria;c__Actinobacteria;o__Bifidobacteriales;f__Bifidobacteriaceae;g__Bifidobacterium;s__bifidum', 'k__Bacteria;p__Actinobacteria;c__Coriobacteriia;o__Coriobacteriales;f__Coriobacteriaceae;g__Collinsella;s__aerofaciens', 'k__Bacteria;p__Actinob…	DM82
1	16	['k__Bacteria;p__Actinobacteria;c__Actinobacteria;o__Bifidobacteriales;f__Bifidobacteriaceae;g__Bifidobacterium;s__adolescentis', 'k__Bacteria;p__Actinobacteria;c__Coriobacteriia;o__Coriobacteriales;f__Coriobacteriaceae;g__Collinsella;s__aerofaciens', 'k__Bacteria;p__Bacteroidetes;c__Bacteroidia;o__Bacteroidales;f__Bacteroidaceae;g__Bacteroides;s__caccae', 'k__Bacteria;p__Bacteroidetes;c__Bactero…	DM82
1	18	['k__Bacteria;p__Actinobacteria;c__Actinobacteria;o__Bifidobacteriales;f__Bifidobacteriaceae;g__Bifidobacterium;s__adolescentis', 'k__Bacteria;p__Actinobacteria;c__Actinobacteria;o__Bifidobacteriales;f__Bifidobacteriaceae;g__Bifidobacterium;s__bifidum', 'k__Bacteria;p__Actinobacteria;c__Coriobacteriia;o__Coriobacteriales;f__Coriobacteriaceae;g__Eggerthella;s__lenta', 'k__Bacteria;p__Bacteroidetes…	DM82
0	11	['k__Bacteria;p__Bacteroidetes;c__Bacteroidia;o__Bacteroidales;f__Bacteroidaceae;g__Bacteroides;s__eggerthii', 'k__Bacteria;p__Bacteroidetes;c__Bacteroidia;o__Bacteroidales;f__Bacteroidaceae;g__Bacteroides;s__fragilis', 'k__Bacteria;p__Bacteroidetes;c__Bacteroidia;o__Bacteroidales;f__Bacteroidaceae;g__Bacteroides;s__ovatus', 'k__Bacteria;p__Bacteroidetes;c__Bacteroidia;o__Bacteroidales;f__Bactero…	DM82
0	14	['k__Bacteria;p__Actinobacteria;c__Actinobacteria;o__Bifidobacteriales;f__Bifidobacteriaceae;g__Bifidobacterium;s__adolescentis', 'k__Bacteria;p__Actinobacteria;c__Coriobacteriia;o__Coriobacteriales;f__Coriobacteriaceae;g__Collinsella;s__aerofaciens', 'k__Bacteria;p__Bacteroidetes;c__Bacteroidia;o__Bacteroidales;f__Bacteroidaceae;g__Bacteroides;s__caccae', 'k__Bacteria;p__Bacteroidetes;c__Bactero…	DM82
0	11	['k__Bacteria;p__Actinobacteria;c__Actinobacteria;o__Bifidobacteriales;f__Bifidobacteriaceae;g__Bifidobacterium;s__adolescentis', 'k__Bacteria;p__Actinobacteria;c__Coriobacteriia;o__Coriobacteriales;f__Coriobacteriaceae;g__Collinsella;s__aerofaciens', 'k__Bacteria;p__Actinobacteria;c__Coriobacteriia;o__Coriobacteriales;f__Coriobacteriaceae;g__Eggerthella;s__lenta', 'k__Bacteria;p__Bacteroidetes;c…	DM82
0	15	['k__Bacteria;p__Actinobacteria;c__Actinobacteria;o__Bifidobacteriales;f__Bifidobacteriaceae;g__Bifidobacterium;s__adolescentis', 'k__Bacteria;p__Actinobacteria;c__Coriobacteriia;o__Coriobacteriales;f__Coriobacteriaceae;g__Collinsella;s__aerofaciens', 'k__Bacteria;p__Bacteroidetes;c__Bacteroidia;o__Bacteroidales;f__Bacteroidaceae;g__Bacteroides;s__caccae', 'k__Bacteria;p__Bacteroidetes;c__Bactero…	DM82
0	13	['k__Bacteria;p__Actinobacteria;c__Actinobacteria;o__Bifidobacteriales;f__Bifidobacteriaceae;g__Bifidobacterium;s__bifidum', 'k__Bacteria;p__Actinobacteria;c__Coriobacteriia;o__Coriobacteriales;f__Coriobacteriaceae;g__Eggerthella;s__lenta', 'k__Bacteria;p__Bacteroidetes;c__Bacteroidia;o__Bacteroidales;f__Bacteroidaceae;g__Bacteroides;s__caccae', 'k__Bacteria;p__Bacteroidetes;c__Bacteroidia;o__Bac…	DM82
0	11	['k__Bacteria;p__Actinobacteria;c__Actinobacteria;o__Bifidobacteriales;f__Bifidobacteriaceae;g__Bifidobacterium;s__adolescentis', 'k__Bacteria;p__Actinobacteria;c__Actinobacteria;o__Bifidobacteriales;f__Bifidobacteriaceae;g__Bifidobacterium;s__bifidum', 'k__Bacteria;p__Actinobacteria;c__Actinobacteria;o__Bifidobacteriales;f__Bifidobacteriaceae;g__Bifidobacterium;s__thermacidophilum', 'k__Bacteria…	DM82
0	14	['k__Bacteria;p__Actinobacteria;c__Actinobacteria;o__Bifidobacteriales;f__Bifidobacteriaceae;g__Bifidobacterium;s__adolescentis', 'k__Bacteria;p__Actinobacteria;c__Coriobacteriia;o__Coriobacteriales;f__Coriobacteriaceae;g__Collinsella;s__aerofaciens', 'k__Bacteria;p__Bacteroidetes;c__Bacteroidia;o__Bacteroidales;f__Bacteroidaceae;g__Bacteroides;s__caccae', 'k__Bacteria;p__Bacteroidetes;c__Bactero…	DM82
0	10	['k__Bacteria;p__Bacteroidetes;c__Bacteroidia;o__Bacteroidales;f__Bacteroidaceae;g__Bacteroides;s__caccae', 'k__Bacteria;p__Bacteroidetes;c__Bacteroidia;o__Bacteroidales;f__Bacteroidaceae;g__Bacteroides;s__ovatus', 'k__Bacteria;p__Bacteroidetes;c__Bacteroidia;o__Bacteroidales;f__Bacteroidaceae;g__Bacteroides;s__uniformis', 'k__Bacteria;p__Bacteroidetes;c__Bacteroidia;o__Bacteroidales;f__Porphyrom…	DM82
0	14	['k__Bacteria;p__Actinobacteria;c__Actinobacteria;o__Bifidobacteriales;f__Bifidobacteriaceae;g__Bifidobacterium;s__adolescentis', 'k__Bacteria;p__Bacteroidetes;c__Bacteroidia;o__Bacteroidales;f__Bacteroidaceae;g__Bacteroides;s__fragilis', 'k__Bacteria;p__Bacteroidetes;c__Bacteroidia;o__Bacteroidales;f__Bacteroidaceae;g__Bacteroides;s__ovatus', 'k__Bacteria;p__Bacteroidetes;c__Bacteroidia;o__Bacte…	DM82
0	14	['k__Bacteria;p__Actinobacteria;c__Coriobacteriia;o__Coriobacteriales;f__Coriobacteriaceae;g__Eggerthella;s__lenta', 'k__Bacteria;p__Bacteroidetes;c__Bacteroidia;o__Bacteroidales;f__Bacteroidaceae;g__Bacteroides;s__caccae', 'k__Bacteria;p__Bacteroidetes;c__Bacteroidia;o__Bacteroidales;f__Bacteroidaceae;g__Bacteroides;s__ovatus', 'k__Bacteria;p__Bacteroidetes;c__Bacteroidia;o__Bacteroidales;f__Bac…	DM82
0	12	['k__Bacteria;p__Actinobacteria;c__Actinobacteria;o__Bifidobacteriales;f__Bifidobacteriaceae;g__Bifidobacterium;s__bifidum', 'k__Bacteria;p__Actinobacteria;c__Coriobacteriia;o__Coriobacteriales;f__Coriobacteriaceae;g__Collinsella;s__aerofaciens', 'k__Bacteria;p__Actinobacteria;c__Coriobacteriia;o__Coriobacteriales;f__Coriobacteriaceae;g__Eggerthella;s__lenta', 'k__Bacteria;p__Bacteroidetes;c__Bac…	DM82
0	15	['k__Bacteria;p__Actinobacteria;c__Actinobacteria;o__Bifidobacteriales;f__Bifidobacteriaceae;g__Bifidobacterium;s__adolescentis', 'k__Bacteria;p__Actinobacteria;c__Coriobacteriia;o__Coriobacteriales;f__Coriobacteriaceae;g__Collinsella;s__aerofaciens', 'k__Bacteria;p__Actinobacteria;c__Coriobacteriia;o__Coriobacteriales;f__Coriobacteriaceae;g__Eggerthella;s__lenta', 'k__Bacteria;p__Bacteroidetes;c…	DM82
0	14	['k__Bacteria;p__Actinobacteria;c__Coriobacteriia;o__Coriobacteriales;f__Coriobacteriaceae;g__Collinsella;s__aerofaciens', 'k__Bacteria;p__Bacteroidetes;c__Bacteroidia;o__Bacteroidales;f__Bacteroidaceae;g__Bacteroides;s__caccae', 'k__Bacteria;p__Bacteroidetes;c__Bacteroidia;o__Bacteroidales;f__Bacteroidaceae;g__Bacteroides;s__fragilis', 'k__Bacteria;p__Bacteroidetes;c__Bacteroidia;o__Bacteroidale…	DM82
0	13	['k__Bacteria;p__Actinobacteria;c__Actinobacteria;o__Bifidobacteriales;f__Bifidobacteriaceae;g__Bifidobacterium;s__adolescentis', 'k__Bacteria;p__Actinobacteria;c__Coriobacteriia;o__Coriobacteriales;f__Coriobacteriaceae;g__Collinsella;s__aerofaciens', 'k__Bacteria;p__Bacteroidetes;c__Bacteroidia;o__Bacteroidales;f__Bacteroidaceae;g__Bacteroides;s__caccae', 'k__Bacteria;p__Bacteroidetes;c__Bactero…	DM82
1	8	['k__Bacteria;p__Actinobacteria;c__Coriobacteriia;o__Coriobacteriales;f__Coriobacteriaceae;g__Collinsella;s__aerofaciens', 'k__Bacteria;p__Bacteroidetes;c__Bacteroidia;o__Bacteroidales;f__Bacteroidaceae;g__Bacteroides;s__uniformis', 'k__Bacteria;p__Bacteroidetes;c__Bacteroidia;o__Bacteroidales;f__Rikenellaceae;g__Alistipes;s__putredinis', 'k__Bacteria;p__Firmicutes;c__Clostridia;o__Clostridiales;…	DM99
1	8	['k__Bacteria;p__Actinobacteria;c__Actinobacteria;o__Bifidobacteriales;f__Bifidobacteriaceae;g__Bifidobacterium;s__adolescentis', 'k__Bacteria;p__Actinobacteria;c__Coriobacteriia;o__Coriobacteriales;f__Coriobacteriaceae;g__Collinsella;s__aerofaciens', 'k__Bacteria;p__Bacteroidetes;c__Bacteroidia;o__Bacteroidales;f__Bacteroidaceae;g__Bacteroides;s__fragilis', 'k__Bacteria;p__Bacteroidetes;c__Bacte…	DM99
1	8	['k__Bacteria;p__Actinobacteria;c__Actinobacteria;o__Bifidobacteriales;f__Bifidobacteriaceae;g__Bifidobacterium;s__adolescentis', 'k__Bacteria;p__Actinobacteria;c__Coriobacteriia;o__Coriobacteriales;f__Coriobacteriaceae;g__Collinsella;s__aerofaciens', 'k__Bacteria;p__Bacteroidetes;c__Bacteroidia;o__Bacteroidales;f__Bacteroidaceae;g__Bacteroides;s__fragilis', 'k__Bacteria;p__Bacteroidetes;c__Bacte…	DM99
1	9	['k__Bacteria;p__Actinobacteria;c__Actinobacteria;o__Bifidobacteriales;f__Bifidobacteriaceae;g__Bifidobacterium;s__adolescentis', 'k__Bacteria;p__Actinobacteria;c__Coriobacteriia;o__Coriobacteriales;f__Coriobacteriaceae;g__Collinsella;s__aerofaciens', 'k__Bacteria;p__Bacteroidetes;c__Bacteroidia;o__Bacteroidales;f__Bacteroidaceae;g__Bacteroides;s__uniformis', 'k__Bacteria;p__Firmicutes;c__Clostri…	DM99
1	8	['k__Bacteria;p__Actinobacteria;c__Actinobacteria;o__Bifidobacteriales;f__Bifidobacteriaceae;g__Bifidobacterium;s__adolescentis', 'k__Bacteria;p__Actinobacteria;c__Coriobacteriia;o__Coriobacteriales;f__Coriobacteriaceae;g__Collinsella;s__aerofaciens', 'k__Bacteria;p__Bacteroidetes;c__Bacteroidia;o__Bacteroidales;f__Bacteroidaceae;g__Bacteroides;s__eggerthii', 'k__Bacteria;p__Bacteroidetes;c__Bact…	DM99
1	9	['k__Bacteria;p__Actinobacteria;c__Actinobacteria;o__Bifidobacteriales;f__Bifidobacteriaceae;g__Bifidobacterium;s__adolescentis', 'k__Bacteria;p__Bacteroidetes;c__Bacteroidia;o__Bacteroidales;f__Bacteroidaceae;g__Bacteroides;s__uniformis', 'k__Bacteria;p__Bacteroidetes;c__Bacteroidia;o__Bacteroidales;f__Rikenellaceae;g__Alistipes;s__onderdonkii', 'k__Bacteria;p__Firmicutes;c__Bacilli;o__Lactobaci…	DM99
0	7	['k__Bacteria;p__Bacteroidetes;c__Bacteroidia;o__Bacteroidales;f__Bacteroidaceae;g__Bacteroides;s__eggerthii', 'k__Bacteria;p__Bacteroidetes;c__Bacteroidia;o__Bacteroidales;f__Bacteroidaceae;g__Bacteroides;s__fragilis', 'k__Bacteria;p__Bacteroidetes;c__Bacteroidia;o__Bacteroidales;f__Bacteroidaceae;g__Bacteroides;s__uniformis', 'k__Bacteria;p__Firmicutes;c__Bacilli;o__Lactobacillales;f__Streptoco…	DM99
0	5	['k__Bacteria;p__Actinobacteria;c__Actinobacteria;o__Bifidobacteriales;f__Bifidobacteriaceae;g__Bifidobacterium;s__thermacidophilum', 'k__Bacteria;p__Actinobacteria;c__Coriobacteriia;o__Coriobacteriales;f__Coriobacteriaceae;g__Collinsella;s__aerofaciens', 'k__Bacteria;p__Bacteroidetes;c__Bacteroidia;o__Bacteroidales;f__Bacteroidaceae;g__Bacteroides;s__uniformis', 'k__Bacteria;p__Firmicutes;c__Clo…	DM99
0	7	['k__Bacteria;p__Actinobacteria;c__Actinobacteria;o__Bifidobacteriales;f__Bifidobacteriaceae;g__Bifidobacterium;s__adolescentis', 'k__Bacteria;p__Actinobacteria;c__Coriobacteriia;o__Coriobacteriales;f__Coriobacteriaceae;g__Collinsella;s__aerofaciens', 'k__Bacteria;p__Bacteroidetes;c__Bacteroidia;o__Bacteroidales;f__Bacteroidaceae;g__Bacteroides;s__uniformis', 'k__Bacteria;p__Bacteroidetes;c__Bact…	DM99
0	7	['k__Bacteria;p__Actinobacteria;c__Actinobacteria;o__Bifidobacteriales;f__Bifidobacteriaceae;g__Bifidobacterium;s__adolescentis', 'k__Bacteria;p__Actinobacteria;c__Coriobacteriia;o__Coriobacteriales;f__Coriobacteriaceae;g__Collinsella;s__aerofaciens', 'k__Bacteria;p__Bacteroidetes;c__Bacteroidia;o__Bacteroidales;f__Bacteroidaceae;g__Bacteroides;s__uniformis', 'k__Bacteria;p__Bacteroidetes;c__Bact…	DM99
0	9	['k__Bacteria;p__Actinobacteria;c__Actinobacteria;o__Bifidobacteriales;f__Bifidobacteriaceae;g__Bifidobacterium;s__adolescentis', 'k__Bacteria;p__Actinobacteria;c__Coriobacteriia;o__Coriobacteriales;f__Coriobacteriaceae;g__Collinsella;s__aerofaciens', 'k__Bacteria;p__Bacteroidetes;c__Bacteroidia;o__Bacteroidales;f__Bacteroidaceae;g__Bacteroides;s__fragilis', 'k__Bacteria;p__Bacteroidetes;c__Bacte…	DM99
0	5	['k__Bacteria;p__Bacteroidetes;c__Bacteroidia;o__Bacteroidales;f__Bacteroidaceae;g__Bacteroides;s__uniformis', 'k__Bacteria;p__Firmicutes;c__Bacilli;o__Lactobacillales;f__Streptococcaceae;g__Streptococcus;s__anginosus', 'k__Bacteria;p__Firmicutes;c__Clostridia;o__Clostridiales;f__Lachnospiraceae;g__Clostridium;s__clostridioforme', 'k__Bacteria;p__Firmicutes;c__Clostridia;o__Clostridiales;f__Lachn…	DM99
0	6	['k__Bacteria;p__Actinobacteria;c__Actinobacteria;o__Bifidobacteriales;f__Bifidobacteriaceae;g__Bifidobacterium;s__adolescentis', 'k__Bacteria;p__Actinobacteria;c__Actinobacteria;o__Bifidobacteriales;f__Bifidobacteriaceae;g__Bifidobacterium;s__thermacidophilum', 'k__Bacteria;p__Bacteroidetes;c__Bacteroidia;o__Bacteroidales;f__Bacteroidaceae;g__Bacteroides;s__fragilis', 'k__Bacteria;p__Bacteroidet…	DM99
0	7	['k__Bacteria;p__Actinobacteria;c__Actinobacteria;o__Bifidobacteriales;f__Bifidobacteriaceae;g__Bifidobacterium;s__adolescentis', 'k__Bacteria;p__Actinobacteria;c__Coriobacteriia;o__Coriobacteriales;f__Coriobacteriaceae;g__Collinsella;s__aerofaciens', 'k__Bacteria;p__Bacteroidetes;c__Bacteroidia;o__Bacteroidales;f__Bacteroidaceae;g__Bacteroides;s__uniformis', 'k__Bacteria;p__Firmicutes;c__Bacilli…	DM99
0	6	['k__Bacteria;p__Bacteroidetes;c__Bacteroidia;o__Bacteroidales;f__Bacteroidaceae;g__Bacteroides;s__uniformis', 'k__Bacteria;p__Bacteroidetes;c__Bacteroidia;o__Bacteroidales;f__Rikenellaceae;g__Alistipes;s__onderdonkii', 'k__Bacteria;p__Firmicutes;c__Bacilli;o__Lactobacillales;f__Streptococcaceae;g__Streptococcus;s__anginosus', 'k__Bacteria;p__Firmicutes;c__Clostridia;o__Clostridiales;f__Ruminococ…	DM99
0	10	['k__Bacteria;p__Actinobacteria;c__Actinobacteria;o__Bifidobacteriales;f__Bifidobacteriaceae;g__Bifidobacterium;s__adolescentis', 'k__Bacteria;p__Bacteroidetes;c__Bacteroidia;o__Bacteroidales;f__Bacteroidaceae;g__Bacteroides;s__fragilis', 'k__Bacteria;p__Bacteroidetes;c__Bacteroidia;o__Bacteroidales;f__Bacteroidaceae;g__Bacteroides;s__uniformis', 'k__Bacteria;p__Bacteroidetes;c__Bacteroidia;o__Ba…	DM99
0	6	['k__Bacteria;p__Bacteroidetes;c__Bacteroidia;o__Bacteroidales;f__Bacteroidaceae;g__Bacteroides;s__uniformis', 'k__Bacteria;p__Firmicutes;c__Clostridia;o__Clostridiales;f__Clostridiaceae;g__Clostridium;s__butyricum', 'k__Bacteria;p__Firmicutes;c__Clostridia;o__Clostridiales;f__Lachnospiraceae;g__Blautia;s__producta', 'k__Bacteria;p__Firmicutes;c__Clostridia;o__Clostridiales;f__Lachnospiraceae;g__…	DM99
0	5	['k__Bacteria;p__Actinobacteria;c__Coriobacteriia;o__Coriobacteriales;f__Coriobacteriaceae;g__Collinsella;s__aerofaciens', 'k__Bacteria;p__Bacteroidetes;c__Bacteroidia;o__Bacteroidales;f__Bacteroidaceae;g__Bacteroides;s__fragilis', 'k__Bacteria;p__Bacteroidetes;c__Bacteroidia;o__Bacteroidales;f__Bacteroidaceae;g__Bacteroides;s__uniformis', 'k__Bacteria;p__Firmicutes;c__Clostridia;o__Clostridiales…	DM99
0	8	['k__Bacteria;p__Actinobacteria;c__Actinobacteria;o__Bifidobacteriales;f__Bifidobacteriaceae;g__Bifidobacterium;s__adolescentis', 'k__Bacteria;p__Actinobacteria;c__Coriobacteriia;o__Coriobacteriales;f__Coriobacteriaceae;g__Collinsella;s__aerofaciens', 'k__Bacteria;p__Bacteroidetes;c__Bacteroidia;o__Bacteroidales;f__Bacteroidaceae;g__Bacteroides;s__eggerthii', 'k__Bacteria;p__Bacteroidetes;c__Bact…	DM99
0	7	['k__Bacteria;p__Actinobacteria;c__Coriobacteriia;o__Coriobacteriales;f__Coriobacteriaceae;g__Collinsella;s__aerofaciens', 'k__Bacteria;p__Bacteroidetes;c__Bacteroidia;o__Bacteroidales;f__Bacteroidaceae;g__Bacteroides;s__fragilis', 'k__Bacteria;p__Bacteroidetes;c__Bacteroidia;o__Bacteroidales;f__Bacteroidaceae;g__Bacteroides;s__uniformis', 'k__Bacteria;p__Bacteroidetes;c__Bacteroidia;o__Bacteroid…	DM99
1	6	['k__Bacteria;p__Actinobacteria;c__Actinobacteria;o__Bifidobacteriales;f__Bifidobacteriaceae;g__Bifidobacterium;s__adolescentis', 'k__Bacteria;p__Actinobacteria;c__Actinobacteria;o__Bifidobacteriales;f__Bifidobacteriaceae;g__Bifidobacterium;s__thermacidophilum', 'k__Bacteria;p__Bacteroidetes;c__Bacteroidia;o__Bacteroidales;f__Bacteroidaceae;g__Bacteroides;s__fragilis', 'k__Bacteria;p__Bacteroidet…	DM101
1	7	['k__Bacteria;p__Actinobacteria;c__Actinobacteria;o__Bifidobacteriales;f__Bifidobacteriaceae;g__Bifidobacterium;s__adolescentis', 'k__Bacteria;p__Bacteroidetes;c__Bacteroidia;o__Bacteroidales;f__Bacteroidaceae;g__Bacteroides;s__fragilis', 'k__Bacteria;p__Bacteroidetes;c__Bacteroidia;o__Bacteroidales;f__Bacteroidaceae;g__Bacteroides;s__uniformis', 'k__Bacteria;p__Firmicutes;c__Clostridia;o__Clostr…	DM101
1	4	['k__Bacteria;p__Bacteroidetes;c__Bacteroidia;o__Bacteroidales;f__Bacteroidaceae;g__Bacteroides;s__uniformis', 'k__Bacteria;p__Firmicutes;c__Clostridia;o__Clostridiales;f__Lachnospiraceae;g__Clostridium;s__clostridioforme', 'k__Bacteria;p__Firmicutes;c__Clostridia;o__Clostridiales;f__Lachnospiraceae;g__Coprococcus;s__eutactus', 'k__Bacteria;p__Verrucomicrobia;c__Verrucomicrobiae;o__Verrucomicrobi…	DM101
1	5	['k__Bacteria;p__Actinobacteria;c__Actinobacteria;o__Bifidobacteriales;f__Bifidobacteriaceae;g__Bifidobacterium;s__adolescentis', 'k__Bacteria;p__Bacteroidetes;c__Bacteroidia;o__Bacteroidales;f__Bacteroidaceae;g__Bacteroides;s__fragilis', 'k__Bacteria;p__Bacteroidetes;c__Bacteroidia;o__Bacteroidales;f__Bacteroidaceae;g__Bacteroides;s__uniformis', 'k__Bacteria;p__Firmicutes;c__Clostridia;o__Clostr…	DM101
1	6	['k__Bacteria;p__Actinobacteria;c__Actinobacteria;o__Bifidobacteriales;f__Bifidobacteriaceae;g__Bifidobacterium;s__adolescentis', 'k__Bacteria;p__Bacteroidetes;c__Bacteroidia;o__Bacteroidales;f__Bacteroidaceae;g__Bacteroides;s__uniformis', 'k__Bacteria;p__Firmicutes;c__Clostridia;o__Clostridiales;f__Clostridiaceae;g__Clostridium;s__neonatale', 'k__Bacteria;p__Firmicutes;c__Clostridia;o__Clostridi…	DM101
1	4	['k__Bacteria;p__Actinobacteria;c__Actinobacteria;o__Bifidobacteriales;f__Bifidobacteriaceae;g__Bifidobacterium;s__adolescentis', 'k__Bacteria;p__Bacteroidetes;c__Bacteroidia;o__Bacteroidales;f__Bacteroidaceae;g__Bacteroides;s__fragilis', 'k__Bacteria;p__Bacteroidetes;c__Bacteroidia;o__Bacteroidales;f__Bacteroidaceae;g__Bacteroides;s__uniformis', 'k__Bacteria;p__Firmicutes;c__Clostridia;o__Clostr…	DM101
1	6	['k__Bacteria;p__Actinobacteria;c__Actinobacteria;o__Bifidobacteriales;f__Bifidobacteriaceae;g__Bifidobacterium;s__adolescentis', 'k__Bacteria;p__Bacteroidetes;c__Bacteroidia;o__Bacteroidales;f__Bacteroidaceae;g__Bacteroides;s__uniformis', 'k__Bacteria;p__Firmicutes;c__Bacilli;o__Lactobacillales;f__Streptococcaceae;g__Lactococcus;s__garvieae', 'k__Bacteria;p__Firmicutes;c__Bacilli;o__Lactobacilla…	DM101
0	5	['k__Bacteria;p__Bacteroidetes;c__Bacteroidia;o__Bacteroidales;f__Bacteroidaceae;g__Bacteroides;s__fragilis', 'k__Bacteria;p__Bacteroidetes;c__Bacteroidia;o__Bacteroidales;f__Bacteroidaceae;g__Bacteroides;s__uniformis', 'k__Bacteria;p__Firmicutes;c__Bacilli;o__Lactobacillales;f__Streptococcaceae;g__Streptococcus;s__agalactiae', 'k__Bacteria;p__Firmicutes;c__Clostridia;o__Clostridiales;f__Clostrid…	DM101
0	3	['k__Bacteria;p__Actinobacteria;c__Actinobacteria;o__Bifidobacteriales;f__Bifidobacteriaceae;g__Bifidobacterium;s__thermacidophilum', 'k__Bacteria;p__Bacteroidetes;c__Bacteroidia;o__Bacteroidales;f__Bacteroidaceae;g__Bacteroides;s__uniformis', 'k__Bacteria;p__Firmicutes;c__Clostridia;o__Clostridiales;f__Lachnospiraceae;g__Clostridium;s__clostridioforme']	DM101
0	4	['k__Bacteria;p__Actinobacteria;c__Actinobacteria;o__Bifidobacteriales;f__Bifidobacteriaceae;g__Bifidobacterium;s__adolescentis', 'k__Bacteria;p__Bacteroidetes;c__Bacteroidia;o__Bacteroidales;f__Bacteroidaceae;g__Bacteroides;s__uniformis', 'k__Bacteria;p__Firmicutes;c__Clostridia;o__Clostridiales;f__Lachnospiraceae;g__Clostridium;s__clostridioforme', 'k__Bacteria;p__Verrucomicrobia;c__Verrucomicr…	DM101
0	4	['k__Bacteria;p__Actinobacteria;c__Actinobacteria;o__Bifidobacteriales;f__Bifidobacteriaceae;g__Bifidobacterium;s__adolescentis', 'k__Bacteria;p__Bacteroidetes;c__Bacteroidia;o__Bacteroidales;f__Bacteroidaceae;g__Bacteroides;s__uniformis', 'k__Bacteria;p__Firmicutes;c__Bacilli;o__Lactobacillales;f__Streptococcaceae;g__Lactococcus;s__garvieae', 'k__Bacteria;p__Verrucomicrobia;c__Verrucomicrobiae;o…	DM101
0	5	['k__Bacteria;p__Actinobacteria;c__Actinobacteria;o__Bifidobacteriales;f__Bifidobacteriaceae;g__Bifidobacterium;s__adolescentis', 'k__Bacteria;p__Bacteroidetes;c__Bacteroidia;o__Bacteroidales;f__Bacteroidaceae;g__Bacteroides;s__fragilis', 'k__Bacteria;p__Bacteroidetes;c__Bacteroidia;o__Bacteroidales;f__Bacteroidaceae;g__Bacteroides;s__uniformis', 'k__Bacteria;p__Firmicutes;c__Clostridia;o__Clostr…	DM101
0	2	['k__Bacteria;p__Bacteroidetes;c__Bacteroidia;o__Bacteroidales;f__Bacteroidaceae;g__Bacteroides;s__uniformis', 'k__Bacteria;p__Firmicutes;c__Clostridia;o__Clostridiales;f__Lachnospiraceae;g__Clostridium;s__clostridioforme']	DM101
0	4	['k__Bacteria;p__Actinobacteria;c__Actinobacteria;o__Bifidobacteriales;f__Bifidobacteriaceae;g__Bifidobacterium;s__adolescentis', 'k__Bacteria;p__Bacteroidetes;c__Bacteroidia;o__Bacteroidales;f__Bacteroidaceae;g__Bacteroides;s__uniformis', 'k__Bacteria;p__Firmicutes;c__Bacilli;o__Lactobacillales;f__Streptococcaceae;g__Lactococcus;s__garvieae', 'k__Bacteria;p__Firmicutes;c__Clostridia;o__Clostridi…	DM101
0	3	['k__Bacteria;p__Bacteroidetes;c__Bacteroidia;o__Bacteroidales;f__Bacteroidaceae;g__Bacteroides;s__uniformis', 'k__Bacteria;p__Firmicutes;c__Clostridia;o__Clostridiales;f__Veillonellaceae;g__Veillonella;s__parvula', 'k__Bacteria;p__Verrucomicrobia;c__Verrucomicrobiae;o__Verrucomicrobiales;f__Verrucomicrobiaceae;g__Akkermansia;s__muciniphila']	DM101
0	4	['k__Bacteria;p__Bacteroidetes;c__Bacteroidia;o__Bacteroidales;f__Bacteroidaceae;g__Bacteroides;s__uniformis', 'k__Bacteria;p__Firmicutes;c__Clostridia;o__Clostridiales;f__Clostridiaceae;g__Clostridium;s__butyricum', 'k__Bacteria;p__Firmicutes;c__Clostridia;o__Clostridiales;f__Lachnospiraceae;g__Blautia;s__producta', 'k__Bacteria;p__Firmicutes;c__Clostridia;o__Clostridiales;f__Lachnospiraceae;g__…	DM101
0	4	['k__Bacteria;p__Bacteroidetes;c__Bacteroidia;o__Bacteroidales;f__Bacteroidaceae;g__Bacteroides;s__fragilis', 'k__Bacteria;p__Bacteroidetes;c__Bacteroidia;o__Bacteroidales;f__Bacteroidaceae;g__Bacteroides;s__uniformis', 'k__Bacteria;p__Firmicutes;c__Clostridia;o__Clostridiales;f__Lachnospiraceae;g__Blautia;s__producta', 'k__Bacteria;p__Firmicutes;c__Clostridia;o__Clostridiales;f__Lachnospiraceae;…	DM101
0	4	['k__Bacteria;p__Actinobacteria;c__Actinobacteria;o__Bifidobacteriales;f__Bifidobacteriaceae;g__Bifidobacterium;s__adolescentis', 'k__Bacteria;p__Bacteroidetes;c__Bacteroidia;o__Bacteroidales;f__Bacteroidaceae;g__Bacteroides;s__fragilis', 'k__Bacteria;p__Bacteroidetes;c__Bacteroidia;o__Bacteroidales;f__Bacteroidaceae;g__Bacteroides;s__uniformis', 'k__Bacteria;p__Firmicutes;c__Clostridia;o__Clostr…	DM101
0	3	['k__Bacteria;p__Bacteroidetes;c__Bacteroidia;o__Bacteroidales;f__Bacteroidaceae;g__Bacteroides;s__fragilis', 'k__Bacteria;p__Bacteroidetes;c__Bacteroidia;o__Bacteroidales;f__Bacteroidaceae;g__Bacteroides;s__uniformis', 'k__Bacteria;p__Firmicutes;c__Clostridia;o__Clostridiales;f__Lachnospiraceae;g__Clostridium;s__clostridioforme']	DM101
0	6	['k__Bacteria;p__Actinobacteria;c__Actinobacteria;o__Bifidobacteriales;f__Bifidobacteriaceae;g__Bifidobacterium;s__adolescentis', 'k__Bacteria;p__Bacteroidetes;c__Bacteroidia;o__Bacteroidales;f__Bacteroidaceae;g__Bacteroides;s__fragilis', 'k__Bacteria;p__Bacteroidetes;c__Bacteroidia;o__Bacteroidales;f__Bacteroidaceae;g__Bacteroides;s__uniformis', 'k__Bacteria;p__Firmicutes;c__Clostridia;o__Clostr…	DM101
1	3	['k__Bacteria;p__Firmicutes;c__Bacilli;o__Lactobacillales;f__Streptococcaceae;g__Streptococcus;s__anginosus', 'k__Bacteria;p__Firmicutes;c__Clostridia;o__Clostridiales;f__Veillonellaceae;g__Veillonella;s__parvula', 'k__Bacteria;p__Verrucomicrobia;c__Verrucomicrobiae;o__Verrucomicrobiales;f__Verrucomicrobiaceae;g__Akkermansia;s__muciniphila']	DM107
1	5	['k__Bacteria;p__Firmicutes;c__Clostridia;o__Clostridiales;f__Lachnospiraceae;g__Blautia;s__producta', 'k__Bacteria;p__Firmicutes;c__Clostridia;o__Clostridiales;f__Lachnospiraceae;g__Clostridium;s__clostridioforme', 'k__Bacteria;p__Firmicutes;c__Clostridia;o__Clostridiales;f__Lachnospiraceae;g__Coprococcus;s__eutactus', 'k__Bacteria;p__Firmicutes;c__Clostridia;o__Clostridiales;f__Lachnospiraceae;…	DM107
1	4	['k__Bacteria;p__Firmicutes;c__Clostridia;o__Clostridiales;f__Clostridiaceae;g__Clostridium;s__butyricum', 'k__Bacteria;p__Firmicutes;c__Clostridia;o__Clostridiales;f__Lachnospiraceae;g__Blautia;s__producta', 'k__Bacteria;p__Firmicutes;c__Clostridia;o__Clostridiales;f__Lachnospiraceae;g__Clostridium;s__clostridioforme', 'k__Bacteria;p__Firmicutes;c__Clostridia;o__Clostridiales;f__Lachnospiraceae;…	DM107
1	5	['k__Bacteria;p__Actinobacteria;c__Coriobacteriia;o__Coriobacteriales;f__Coriobacteriaceae;g__Collinsella;s__aerofaciens', 'k__Bacteria;p__Firmicutes;c__Clostridia;o__Clostridiales;f__Lachnospiraceae;g__Clostridium;s__clostridioforme', 'k__Bacteria;p__Firmicutes;c__Clostridia;o__Clostridiales;f__Lachnospiraceae;g__Coprococcus;s__eutactus', 'k__Bacteria;p__Firmicutes;c__Clostridia;o__Clostridiales…	DM107
1	6	['k__Bacteria;p__Actinobacteria;c__Coriobacteriia;o__Coriobacteriales;f__Coriobacteriaceae;g__Collinsella;s__aerofaciens', 'k__Bacteria;p__Firmicutes;c__Clostridia;o__Clostridiales;f__Clostridiaceae;g__Clostridium;s__neonatale', 'k__Bacteria;p__Firmicutes;c__Clostridia;o__Clostridiales;f__Lachnospiraceae;g__Blautia;s__producta', 'k__Bacteria;p__Firmicutes;c__Clostridia;o__Clostridiales;f__Lachnos…	DM107
1	4	['k__Bacteria;p__Actinobacteria;c__Coriobacteriia;o__Coriobacteriales;f__Coriobacteriaceae;g__Collinsella;s__aerofaciens', 'k__Bacteria;p__Firmicutes;c__Clostridia;o__Clostridiales;f__Lachnospiraceae;g__Coprococcus;s__eutactus', 'k__Bacteria;p__Firmicutes;c__Clostridia;o__Clostridiales;f__Lachnospiraceae;g__Dorea;s__formicigenerans', 'k__Bacteria;p__Verrucomicrobia;c__Verrucomicrobiae;o__Verrucom…	DM107
1	3	['k__Bacteria;p__Firmicutes;c__Bacilli;o__Lactobacillales;f__Streptococcaceae;g__Streptococcus;s__anginosus', 'k__Bacteria;p__Firmicutes;c__Clostridia;o__Clostridiales;f__Lachnospiraceae;g__Clostridium;s__clostridioforme', 'k__Bacteria;p__Firmicutes;c__Clostridia;o__Clostridiales;f__Lachnospiraceae;g__Dorea;s__formicigenerans']	DM107
1	3	['k__Bacteria;p__Actinobacteria;c__Coriobacteriia;o__Coriobacteriales;f__Coriobacteriaceae;g__Collinsella;s__aerofaciens', 'k__Bacteria;p__Firmicutes;c__Clostridia;o__Clostridiales;f__Lachnospiraceae;g__Clostridium;s__clostridioforme', 'k__Bacteria;p__Firmicutes;c__Clostridia;o__Clostridiales;f__Lachnospiraceae;g__Dorea;s__formicigenerans']	DM107
1	5	['k__Bacteria;p__Firmicutes;c__Bacilli;o__Lactobacillales;f__Streptococcaceae;g__Lactococcus;s__garvieae', 'k__Bacteria;p__Firmicutes;c__Bacilli;o__Lactobacillales;f__Streptococcaceae;g__Streptococcus;s__anginosus', 'k__Bacteria;p__Firmicutes;c__Clostridia;o__Clostridiales;f__Lachnospiraceae;g__Dorea;s__formicigenerans', 'k__Bacteria;p__Firmicutes;c__Clostridia;o__Clostridiales;f__Veillonellaceae…	DM107
0	4	['k__Bacteria;p__Actinobacteria;c__Coriobacteriia;o__Coriobacteriales;f__Coriobacteriaceae;g__Collinsella;s__aerofaciens', 'k__Bacteria;p__Firmicutes;c__Clostridia;o__Clostridiales;f__Clostridiaceae;g__Clostridium;s__butyricum', 'k__Bacteria;p__Firmicutes;c__Clostridia;o__Clostridiales;f__Lachnospiraceae;g__Clostridium;s__clostridioforme', 'k__Bacteria;p__Firmicutes;c__Clostridia;o__Clostridiales…	DM107
0	3	['k__Bacteria;p__Firmicutes;c__Clostridia;o__Clostridiales;f__Clostridiaceae;g__Clostridium;s__butyricum', 'k__Bacteria;p__Firmicutes;c__Clostridia;o__Clostridiales;f__Lachnospiraceae;g__Clostridium;s__clostridioforme', 'k__Bacteria;p__Firmicutes;c__Clostridia;o__Clostridiales;f__Lachnospiraceae;g__Dorea;s__formicigenerans']	DM107
0	3	['k__Bacteria;p__Actinobacteria;c__Coriobacteriia;o__Coriobacteriales;f__Coriobacteriaceae;g__Collinsella;s__aerofaciens', 'k__Bacteria;p__Firmicutes;c__Clostridia;o__Clostridiales;f__Lachnospiraceae;g__Clostridium;s__clostridioforme', 'k__Bacteria;p__Firmicutes;c__Clostridia;o__Clostridiales;f__Lachnospiraceae;g__Dorea;s__formicigenerans']	DM107
0	3	['k__Bacteria;p__Actinobacteria;c__Coriobacteriia;o__Coriobacteriales;f__Coriobacteriaceae;g__Collinsella;s__aerofaciens', 'k__Bacteria;p__Firmicutes;c__Clostridia;o__Clostridiales;f__Lachnospiraceae;g__Clostridium;s__clostridioforme', 'k__Bacteria;p__Verrucomicrobia;c__Verrucomicrobiae;o__Verrucomicrobiales;f__Verrucomicrobiaceae;g__Akkermansia;s__muciniphila']	DM107
0	3	['k__Bacteria;p__Actinobacteria;c__Coriobacteriia;o__Coriobacteriales;f__Coriobacteriaceae;g__Collinsella;s__aerofaciens', 'k__Bacteria;p__Firmicutes;c__Bacilli;o__Lactobacillales;f__Streptococcaceae;g__Lactococcus;s__garvieae', 'k__Bacteria;p__Verrucomicrobia;c__Verrucomicrobiae;o__Verrucomicrobiales;f__Verrucomicrobiaceae;g__Akkermansia;s__muciniphila']	DM107
0	2	['k__Bacteria;p__Firmicutes;c__Clostridia;o__Clostridiales;f__Lachnospiraceae;g__Coprococcus;s__eutactus', 'k__Bacteria;p__Firmicutes;c__Clostridia;o__Clostridiales;f__Veillonellaceae;g__Veillonella;s__parvula']	DM107
0	4	['k__Bacteria;p__Actinobacteria;c__Coriobacteriia;o__Coriobacteriales;f__Coriobacteriaceae;g__Collinsella;s__aerofaciens', 'k__Bacteria;p__Firmicutes;c__Bacilli;o__Lactobacillales;f__Streptococcaceae;g__Lactococcus;s__garvieae', 'k__Bacteria;p__Firmicutes;c__Clostridia;o__Clostridiales;f__Lachnospiraceae;g__Coprococcus;s__eutactus', 'k__Bacteria;p__Firmicutes;c__Clostridia;o__Clostridiales;f__Lac…	DM107
0	3	['k__Bacteria;p__Actinobacteria;c__Coriobacteriia;o__Coriobacteriales;f__Coriobacteriaceae;g__Collinsella;s__aerofaciens', 'k__Bacteria;p__Firmicutes;c__Clostridia;o__Clostridiales;f__Lachnospiraceae;g__Blautia;s__producta', 'k__Bacteria;p__Firmicutes;c__Clostridia;o__Clostridiales;f__Lachnospiraceae;g__Clostridium;s__clostridioforme']	DM107
0	3	['k__Bacteria;p__Actinobacteria;c__Coriobacteriia;o__Coriobacteriales;f__Coriobacteriaceae;g__Collinsella;s__aerofaciens', 'k__Bacteria;p__Firmicutes;c__Clostridia;o__Clostridiales;f__Lachnospiraceae;g__Clostridium;s__clostridioforme', 'k__Bacteria;p__Firmicutes;c__Clostridia;o__Clostridiales;f__Lachnospiraceae;g__Dorea;s__formicigenerans']	DM107
0	3	['k__Bacteria;p__Actinobacteria;c__Coriobacteriia;o__Coriobacteriales;f__Coriobacteriaceae;g__Collinsella;s__aerofaciens', 'k__Bacteria;p__Firmicutes;c__Clostridia;o__Clostridiales;f__Lachnospiraceae;g__Clostridium;s__clostridioforme', 'k__Bacteria;p__Firmicutes;c__Clostridia;o__Clostridiales;f__Lachnospiraceae;g__Dorea;s__formicigenerans']	DM107
0	3	['k__Bacteria;p__Actinobacteria;c__Coriobacteriia;o__Coriobacteriales;f__Coriobacteriaceae;g__Collinsella;s__aerofaciens', 'k__Bacteria;p__Firmicutes;c__Clostridia;o__Clostridiales;f__Clostridiaceae;g__Clostridium;s__butyricum', 'k__Bacteria;p__Firmicutes;c__Clostridia;o__Clostridiales;f__Lachnospiraceae;g__Clostridium;s__clostridioforme']	DM107

## Sheet: Figure 10B
aligned SIMMER C. scindens hits	dexamethasone consumption slope	17-oxodexamethasone production slope	run accession	accession reads	SIMMER C. scindens hits normalized by reads
2539	0.1	148694	ERR3261729	22693718	0.000111881
3939	0.044	122616	ERR3261721	24413216	0.000161347
1437	0.045	119226	ERR3261740	24002910	5.98677e-05
1091	-0.006	4.211	ERR3261725	24475773	4.45747e-05
1370	-0.014	229.476	ERR3261720	21363384	6.41284e-05
1232	0.018	38.294	ERR3261746	35044258	3.51555e-05
2145	0.042	48859.5	ERR3261744	29665747	7.23056e-05
2780	0.061	116218	ERR3261739	21701426	0.000128102
2337	0.018	67911.1	ERR3261730	26220019	8.91304e-05
4156	0.114	113905	ERR3261743	24192464	0.000171789
2737	-0.002	41.255	ERR3261726	163225654	1.67682e-05
1755	0.056	67462.6	ERR3261747	25447091	6.89666e-05
2824	0.146	182034	ERR3261728	18313255	0.000154205
416	0.01	4.625	ERR3261741	21947379	1.89544e-05
943	-0.001	1122.5	ERR3261734	28003000	3.3675e-05
1102	0.007	133.308	ERR3261724	18688079	5.89681e-05
318	0.01	93.896	ERR3261732	25882024	1.22865e-05
1409	0.005	82.003	ERR3261738	24006124	5.86934e-05
3836	0.036	84159.3	ERR3261731	24988519	0.00015351
1518	0.005	418.451	ERR3261736	23633537	6.42308e-05
2221	0.244	176050	ERR3261722	20515348	0.00010826
5575	0.007	21911.7	ERR3261733	25243832	0.000220846
195	0.013	5843.06	ERR3261745	23919332	8.1524e-06
2806	0.013	70400.3	ERR3261723	25299302	0.000110912
233	0.005	34204.2	ERR3261742	25027049	9.30993e-06
3175	0.004	24288.6	ERR3261727	20573767	0.000154323
614	-0.007	4695.76	ERR3261735	26579564	2.31005e-05
2558	0	3248.57	ERR3261737	23977488	0.000106683
	slope data pulled from Zimmermann, et al. Supplementary Table 9-Table 1.csv	slope data pulled from Zimmermann, et al. Supplementary Table 9-Table 1.csv	PRJEB31790
SIMMER C. scindens sequences:
UHGG_ID	Prokka_annotation	MetaCyc_rxn	Sequence
GUT_GENOME095973_02377	2-hydroxy-6-oxo-6-phenylhexa-2,4-dienoate hydrolase	TROPINESTERASE-RXN	MMDIRLYYEKAGDGEPLIMLHGNGEDGTYFKHQMEYFSKDYRVIAIDTRGHGKSPRGEKPFTIRQFAEDLNGFMEEQGMEKAHLLGFSDGGNIALAFALRYPGKVESLILNGANLCPAGVKPSVQIPIVLGYKITSFFGRFHHRSRQKAEMLGLMTTQPDLSPRQLKEVKARTLVIVGENDMIKDSHSLLICESLPNARLVRIKGDHFIAAKNPEEFNRAVSRFLRNCDSIV
GUT_GENOME095973_03135	N-acetylneuraminate lyase	ACNEULY-RXN	MRDLDKYKGVIPAFYACYDKEGNISPKGVQALTRYFVEKGVKGIYVNGSSGECIYQSVEDKKIVLENVMKAAEGKLTVIAHVACNNTKDSQELARHAESLGVDAIAAIPPIYFHLPEYAIAQYWNEISSAAPNTDFVIYNIPQLAGVALTMGLFEEMRKNPRVIGVKNSSMPVQDIQMFKQAAGEDYIIFNGPDEQFMSGRVIGAEGAIGGTYGAMPELFLKLDEHVKNGEIEKARELQHAINAIIYKMCSAHGNMYGVIKEILKKNENLELGGVRKPLPSLIDSDMPIVEEAARMICEAKDKYLA
GUT_GENOME095973_00127	4-hydroxy-tetrahydrodipicolinate synthase	ACNEULY-RXN	MAIFKGSGVAIVTPFKEDGSIDYDKLDELIDYHCENGTDSIIICGTTGESATMTEEEHMDCVKFAIERTRKRIPVVAGTGSNCTRTAIDMSKEAAENGADGLLVVTPYYNKATQEGLIAHFTAVAKEAKAPIIMYSVASRTGCNIEPATVAALVKNVDNIVGVKEASGNISQIAKIMSMTDGNIDLYSGNDDQIVPLLSLGGIGVISVLANVAPKETHDICAKFFEGDIEGSAKLQLKAVPLIDRLFCEVNPIPVKRAMKFMGMDCGPLRMPLTELTAEHEQSLAQAMKDFGIQLV

## Sheet: Figure 10-figure supplement 1
aligned desAB	dexamethasone consumption slope	17-oxodexamethasone production slope	run accession	accession reads	desAB normalized by reads
89	0.007	133.308	ERR3261724	18688079	4.76239e-06
30	-0.014	229.476	ERR3261720	21363384	1.40427e-06
686	0.005	34204.2	ERR3261742	25027049	2.74103e-05
214	0.007	21911.7	ERR3261733	25243832	8.47732e-06
417	0.018	38.294	ERR3261746	35044258	1.18992e-05
403	0.244	176050	ERR3261722	20515348	1.96438e-05
236	0.005	418.451	ERR3261736	23633537	9.98581e-06
136	0.044	122616	ERR3261721	24413216	5.57075e-06
194	0.013	70400.3	ERR3261723	25299302	7.6682e-06
457	-0.001	1122.5	ERR3261734	28003000	1.63197e-05
502	0.061	116218	ERR3261739	21701426	2.31321e-05
2577	-0.002	41.255	ERR3261726	163225654	1.5788e-05
284	0	3248.57	ERR3261737	23977488	1.18444e-05
666	0.042	48859.5	ERR3261744	29665747	2.24501e-05
330	0.004	24288.6	ERR3261727	20573767	1.60398e-05
453	-0.007	4695.76	ERR3261735	26579564	1.70432e-05
775	0.036	84159.3	ERR3261731	24988519	3.10142e-05
216	0.018	67911.1	ERR3261730	26220019	8.23798e-06
615	0.045	119226	ERR3261740	24002910	2.56219e-05
319	0.056	67462.6	ERR3261747	25447091	1.25358e-05
271	0.005	82.003	ERR3261738	24006124	1.12888e-05
232	-0.006	4.211	ERR3261725	24475773	9.47876e-06
143	0.146	182034	ERR3261728	18313255	7.80855e-06
388	0.114	113905	ERR3261743	24192464	1.60381e-05
175	0.1	148694	ERR3261729	22693718	7.71139e-06
322	0.01	93.896	ERR3261732	25882024	1.24411e-05
458	0.013	5843.06	ERR3261745	23919332	1.91477e-05
378	0.01	4.625	ERR3261741	21947379	1.7223e-05
	data pulled from Zimmermann, et al. Supplementary Table 9-Table 1.csv	data pulled from Zimmermann, et al. Supplementary Table 9-Table 1.csv	PRJEB31790

## Sheet: Javdan_PD_mgx
DM_ID	Drug	Metabolite	Donia matching metabolite	rxn _rank	EC	EC index	EC p_val	method	Hits recovered in PD
DM6	capecitabine	deglycocapecitabine	capecitabine M1	1	3.1.3.108	10	0.001	UHGG_PSF_hmmsearch	GUT_GENOME096366_01435 Alkaline phosphatase 3	GUT_GENOME096366_01435 Alkaline phosphatase 3,GUT_GENOME096222_01536 Alkaline phosphatase 4,GUT_GENOME096203_02746 Alkaline phosphatase 3,GUT_GENOME001003_01630 Alkaline phosphatase 4,GUT_GENOME147854_03532 Alkaline phosphatase 3
DM111	capecitabine	5DFCR		1	3.4	6	0.001	UHGG_uniprotentrez_phmmersearch	GUT_GENOME095941_01214 hypothetical protein	GUT_GENOME095941_01214 hypothetical protein
DM79	misoprostol	misoprostol acid	misoprostol M1	2-42	3.1.4.39	42	0.001	multiple (methods for rxns 1-42)	GUT_GENOME096366_02434 Arylsulfatase	GUT_GENOME096366_02434 Arylsulfatase,GUT_GENOME096366_02432 hypothetical protein
DM80	mycophenolate mofetil	mycophenolic acid	mycophenolate mofetil M1	1	3.1.1.28	7	0.001	UHGG_PSF_hmmsearch	GUT_GENOME001587_01781 Para-nitrobenzyl esterase	GUT_GENOME001587_01781 Para-nitrobenzyl esterase,GUT_GENOME001587_01870 Carboxylesterase
DM82	nicardipine	aminonicardipine	nicardipine M1	1	5.4.99.18	2	0.001	UHGG_uniprotentrez_phmmersearch	GUT_GENOME251930_01437 2-amino-4-deoxychorismate dehydrogenase	GUT_GENOME251930_01437 2-amino-4-deoxychorismate dehydrogenase
DM99	risperidone	hydrolysis metabolite	risperidone M1	2-62	1	62	0.009	multiple (methods for rxns 1-62)	GUT_GENOME122482_01339 Oxalate-binding protein	GUT_GENOME122482_01339 Oxalate-binding protein,GUT_GENOME127781_02006 hypothetical protein,GUT_GENOME020741_00825 Catalase,GUT_GENOME096366_00499 Catalase,GUT_GENOME143232_00765 Catalase
DM101	spironolactone	7a-thiospironolactone	spiranolactone M1	2-34	3.1.1.49	34	0.001	multiple (methods for rxns 1-34)	GUT_GENOME001587_01781 Para-nitrobenzyl esterase	GUT_GENOME001587_01781 Para-nitrobenzyl esterase,GUT_GENOME001587_01781 Para-nitrobenzyl esterase,GUT_GENOME001587_01870 Carboxylesterase,GUT_GENOME001587_01870 Carboxylesterase,GUT_GENOME001587_01781 Para-nitrobenzyl esterase,GUT_GENOME001587_01781 Para-nitrobenzyl esterase,GUT_GENOME001587_01870 Carboxylesterase,GUT_GENOME001587_01870 Carboxylesterase
DM105	sulindac	sulindac sulfide	sulindac M1	1	1.5.1.44	8	0.001	UHGG_MC_hmmsearch	GUT_GENOME153241_00753 Quinone oxidoreductase 2	GUT_GENOME153241_00753 Quinone oxidoreductase 2
DM107	tolcapone	N-acetylamino-tolcapone	tolcapone M1	1	1.13.11.43	4	0.001	UHGG_PSF_hmmsearch	GUT_GENOME283626_01258 Glutamyl-tRNA(Gln) amidotransferase subunit A	GUT_GENOME283626_01258 Glutamyl-tRNA(Gln) amidotransferase subunit A,GUT_GENOME086787_00811 Glutamyl-tRNA(Gln) amidotransferase subunit A,GUT_GENOME001241_02378 Glutamyl-tRNA(Gln) amidotransferase subunit A,GUT_GENOME066545_00164 Glutamyl-tRNA(Gln) amidotransferase subunit A,GUT_GENOME066545_00253 Glutamyl-tRNA(Gln) amidotransferase subunit A,GUT_GENOME239728_01500 Glutamyl-tRNA(Gln) amidotransfe…
