# Supplementary material for: SIMMER employs similarity algorithms to accurately identify human gut microbiome species and enzymes capable of known chemical transformations
Source: eLife. 2023 Jun 12;12:e82401. doi: 10.7554/eLife.82401 (PMC10289814; doi:10.7554/eLife.82401)
Supplement: Table 1—source data 1. [file elife-82401-table1-data1.xlsx]

## Sheet: Sheet1
	Sheet number	Sheet name	Contents
	1	Comparison_EC_predictions	EC predictions made for positive control queries by SIMMER, DrugBug, and MicrobeFDT
	2	Comparison_enzyme_predictions	Enzyme predictions made for positive control queries by SIMMER and DrugBug
	3	SIMMER_substrate	Positive control search results when SIMMER is only allowed to use substrate representations. Copy of SIMMER_substrate tab in Figure 5-source data.xlsx (for comparison with full reaction representation results)
	4	Comparison_external_dataset_val	Predictions on external datasets (those represented in Figure 9 and Figure 10) made by SIMMER, DrugBug, and MicrobeFDT.
	5	DrugBug_MicrobeFDT_positive_con	SIMMER prediction performance on the positive control set published in DrugBug publication and on the experimental validation from the MicrobeFDT publication
Supports Sheet 1	6	MicrobeFDT_EC	Cypher commands input to MicrobeFDT for the postive control substrates already EC annotated within its database
Supports Sheet 1	7	MicrobeFDT_substructure_overlap	Cypher commands input to MicrobeFDT for the postive control substrates unannotated within its database (i.e. MicrobeFDT EC predictions)
Supports Sheet 5	8	MicrobeFDT_Altretamine	Cypher commands input to MicrobeFDT to assess their predictions on experimentally validated Altretamine
Supports Sheet 2	9-15	DrugBug_<drug name>	Positive control prediction results for DrugBug queries that resulted in enzyme predictions.

## Sheet: Comparison_EC_predictions
substrate	pcID_substrate	EC (Literature)	SIMMER_EC	DrugBug_EC	MicrobeFDT_EC	MicrobeFDT_substructure_overlap_EC	MicrobeFDT_EC_or_SUBSTRUCTURE_EC
5-asa	4075	2.3.1.5	2.3.1.5	1.-	no association	3.1.2.2	3.1.2.2
4-asa	4649	2.3.1.5	2.3.1.5	1.-	no association	3.1.2.2	3.1.2.2
5-fu	3385	1.3.1.1	1.3.1.2	2.-	no association	2.1.1.59	2.1.1.60
balsalazide	54585	1.7.1.6	1.5.1.34	2.-	no association	no prediction
brivudine	446727	2.4.2.2	no prediction	2.7.1.21	no association	no prediction
capecitabine	60953	2.4.2.-	2.-	3.-	no association	no prediction
clonazepam	2802	1.5.1.34	1.1.1.-	1.-	no association	3.2.1.21	3.2.1.22
diclofenac glucuronide	16084218	3.2.1.31	3.2.1.-	2.-	no association	3.5.1.24	3.5.1.24
digoxin	2724385	1.3.2.-	1.5.98.2	2.4.1-	no association	3.5.1.24	3.5.1.24
diltiazem	39186	-	3.1.1.78	3.1-	no association	3.2.1.31	3.2.1.32
dopamine	681	1.1.-	1.-	2.-	1.4.3.21	3.1.2.2	1.4.3.21
doxifluridine	18343	2.4.2.-	2.4.2.2	4.-	no association	no prediction
ezetimib glucuronide	9894653	3.2.1.31	3.2.1.206	2.4.-	no association	no prediction
flunitrazepam	3380	1.5.1.34	1.14.13.232	1.14.-	no association	no prediction
gemcitabine	60750	3.5.4.5	3.5.4.5	2.7.-	no association	no prediction
hydrocortisone (20alpha metabolite)	5754	1.1.1.1	1.1.1.149	5.3.-	no association	3.2.1.31	3.2.1.31
hydrocortisone (20beta metabolite)	5754	1.-	1.1.1.149	5.3.-	no association	3.2.1.31	3.2.1.31
indomethacin glucuronide	70691027	3.2.1.31	3.2.1.175	2.-	no association	no prediction
ketoprofen glucuronide	131281	3.2.1.31	3.2.1.40	2.-	3.2.1.31	3.5.1.24	3.2.1.31
levodopa	6047	4.1.1.25	4.1.1.25	1.-	1.13.11.29	3.1.2.2	1.13.11.29
morphine 6-glucuronide	5360621	3.2.1.31	3.2.1.125	2.4.-	no association	no prediction
mycophenolate-glucuronide	6442661	3.2.1.31	3.-	2.4.-	no association	no prediction
nicardipine	4474	1.5.1.34	5.4.99.18	1.14.-	no association	no prediction
nitrazepam	4506	1.5.1.34	1.1.1.-	1.14.-	no association	no prediction
olsalazine	22419	1.7.1.6	1.7.1.17	1.14.-	no association	no prediction
pericyazine (acetyl metabolite)	4747	-	2.3.1.175	1.14.-	no association	no prediction
pericyazine (propionyl metabolite)	4747	-	2.3.1.7	1.14.-	no association	no prediction
prontosil	66895	1.7.1.6	1.7.1.17	1.14.-	no association	no prediction
regorafenib-glucuronide	145996739	3.2.1.31	3.-	2.3.-	no association	no prediction
SN38-g	443154	3.2.1.31	3.2.1.175	3.2.1.31	3.2.1.31	2.3.1.199	3.2.1.31
sorivudine	5282192	2.4.2.2	2.4.2.2	2.7.1.48	no association	no prediction
sulfasalazine	5339	1.7.1.6	1.5.1.34	1.-	no association	3.2.1.21	3.2.1.21
trifluridine	6256	2.4.2.-	2.4.2.3	2.-	no association	no prediction
			0.933333	0.366667			0.285714

## Sheet: Comparison_enzyme_predictions
Substrate	pcID_substrate	Known_enzyme	SIMMER_enzyme_rank	DrugBug_enzyme_rank
5-asa	4075	NAT	1	no prediction
4-asa	4649	NAT	1	no prediction
5-fu	3385	PreTA	1	no prediction
balsalazide	54585	AzoR	98	no prediction
brivudine	446727	BT_4554	7	not in list
capecitabine	60953	UP/TP	5	no prediction
clonazepam	2802	NfsB	6	no prediction
diclofenac glucuronide	16084218	Bgus	1	no prediction
digoxin	2724385	Cgr2	6	not in list
diltiazem	39186	BT_4096	5	no prediction
dopamine	681	Dadh	1	no prediction
doxifluridine	18343	UP/TP	1	no prediction
ezetimib glucuronide	9894653	Bgus	5	no prediction
flunitrazepam	3380	NfsB	4	no prediction
gemcitabine	60750	Cdd	1	no prediction
hydrocortisone (20alpha metabolite)	5754	20A-HSDH	1	not in list
hydrocortisone (20beta metabolite)	5754	20B-HSDH	3	not in list
indomethacin glucuronide	70691027	Bgus	3	no prediction
ketoprofen glucuronide	131281	Bgus	1	no prediction
levodopa	6047	TyrDC	1	no prediction
morphine 6-glucuronide	5360621	Bgus	10	no prediction
mycophenolate-glucuronide	6442661	Bgus	9	not in list
nicardipine	4474	AzoR	1	no prediction
nitrazepam	4506	NfsB	10	no prediction
olsalazine	22419	AzoR	1	no prediction
pericyazine (acetyl metabolite)	4747	BT_2367	177	no prediction
pericyazine (propionyl metabolite)	4747	BT_2367	90	no prediction
prontosil	66895	AzoR	1	no prediction
regorafenib-glucuronide	145996739	WP_118581144.1, WP_118096903.1, CBJ55484.1, CBK98066.1	2	not in list
SN38-g	443154	Bgus	3	3
sorivudine	5282192	BT_4554	4	not in list
sulfasalazine	5339	AzoR	82	no prediction
trifluridine	6256	UP/TP	1	no prediction
			88% (N=20 rxns)	0.030303
			42% (N=1 rxn)

## Sheet: SIMMER_substrate
drug	microbial enzyme/gene	EC (literature)	SIMMER_substrate EC	Literature sequence found in top 20 reactions	Reaction rank	Reaction	Euclidean distance to reaction yielding positive control	Euclidean distance to farthest reaction	Normalized Euclidean distance	Reaction FPR
hydrocortisone (cortisol)	20A-HSDH	1.1.1.1	1.3.1	Yes	2	RXN-15357_f	0	26.9891	0	0.05
hydrocortisone (cortisol)	20B-HSDH	1.-	1.3.1	Yes	6	RXN-15607	2.22388	26.9891	0.0823991	0.25
balsalazide	AzoR	1.7.1.6	4.99.1	No	1084	RXN-18509	8.5149	26.9891	0.315494	1
olsalazine	AzoR	1.7.1.6	1.14.13	Yes	5	RXN-13069	2.32247	24.8552	0.09344	0.2
prontosil	AzoR	1.7.1.6	1.7.1	Yes	1	AZOBENZENE-REDUCTASE-RXN	2.39516	24.478	0.0978493	0
nicardipine	AzoR	1.5.1.34	1.14.14	No	1049	RXN-18509	6.88518	25.4646	0.270383	1
sulfasalazine	AzoR, BT_0217, BT_1429	1.7.1.6	1.14.14	No	55	AZOBENZENE-REDUCTASE-RXN	3.90019	24.0555	0.162133	1
ezetimib glucuronide	Beta-glucuronidase	3.2.1.31	no prediction	Yes	1	RXN-15289	2.44836	25.8593	0.09468	0
diclofenac glucuronide	Beta-glucuronidase	3.2.1.31	2.3.1	No	162	RXN-14478	4.49871	26.0301	0.172827	1
indomethacin glucuronide	Beta-glucuronidase	3.2.1.31	3.2.1	Yes	16	RXN-14478	3.24457	26.5814	0.122062	0.75
ketoprofen glucuronide	Beta-glucuronidase	3.2.1.31	2.3.1	No	146	RXN-15289	4.73198	26.5441	0.178269	1
morphine 6-glucuronide	Beta-glucuronidase	3.2.1.31	no prediction	No	150	RXN-16249	4.59418	26.9107	0.17072	1
mycophenolate-glucuronide	Beta-glucuronidase	3.2.1.31	1.14.13	No	27	RXN-16249	4.15208	27.7654	0.149541	1
SN38-G	Beta-glucuronidase	3.2.1.31	3.2.1	Yes	4	RXN-14478	2.66369	26.7493	0.0995798	0.15
regorafenib-glucuronide	WP_118581144.1, WP_118096903.1, CBJ55484.1, CBK98066.1	3.2.1.31	no prediction	Yes	15	RXN-15289	3.71549	24.8243	0.149672	0.7
diltiazem	BT_4096	-	1.14.14	No	268	RXN-12252	4.54115	25.0486	0.181294	1
pericyazine	BT_2367	-	1	No	4621	RXN-21324	10.9407	23.9287	0.45722	1
pericyazine	BT_2367	-	1	No	4621	RXN-21324	10.9407	23.9287	0.45722	1
digoxin	Cgr2	1.3.2.-	3.2.1	No	1755	RXN-15614_f	9.23224	25.4117	0.363307	1
gemcitabine	Cytidine deaminase	3.5.4.5	2.7.1	No	8598	CYTIDEAM-RXN	25.115	25.115	1	1
dopamine	DadhR506	1.1.-.-	1	Yes	1	RXN-21082	0	25.3299	0	0
4-asa	N-acetyltransferase	2.3.1.5	1	No	42	RXN-13871	2.90678	25.8761	0.112334	1
5-asa (mesalazine)	N-acetyltransferase	2.3.1.5	1.13.11	No	33	RXN-13871	2.87265	26.1731	0.109756	1
clonazepam	NfsB	1.5.1.34	1.14.13	No	7881	RXN-13402	23.1756	24.4859	0.946484	1
flunitrazepam	NfsB	1.5.1.34	1.14.14	No	7881	RXN-13402	23.2478	24.4678	0.950138	1
nitrazepam	NfsB	1.5.1.34	1.14.13	No	7878	RXN-13402	23.2947	24.7418	0.941513	1
5-fu	PreTA	1.3.1.1	1.17.1	Yes	13	DIHYDROURACIL-DEHYDROGENASE-NAD+-RXN_r	2.25259	25.28	0.0891055	0.6
brivudine	BT_4554	2.4.2.2	no prediction	No	4882	URPHOS-RXN_f	12.4213	26.0345	0.47711	1
sorivudine	BT_4554	2.4.2.2	3.2.2	No	5092	URPHOS-RXN_f	13.0587	26.3657	0.495293	1
capecitabine	Thymidine phosphorylase	2.4.2.-	3.5.4	No	4722	URPHOS-RXN_f	11.935	25.7249	0.463946	1
doxifluridine	Thymidine phosphorylase	2.4.2.-	no prediction	Yes	5	URA-PHOSPH-RXN_f	3.56264	24.9813	0.142612	0.2
trifluridine	Thymidine phosphorylase	2.4.2.-	no prediction	Yes	1	URA-PHOSPH-RXN_f	2.04112	25.4197	0.0802967	0
levodopa	TyrDC	4.1.1.25	1	No	8588	PHENYLALANINE-DECARBOXYLASE-RXN	26.0628	26.0628	1	1
capecitabine	Uridine phosphorylase	2.4.2.-	3.5.4	No	4722	URPHOS-RXN_f	11.935	25.7249	0.463946	1
doxifluridine	Uridine phosphorylase	2.4.2.-	no prediction	No	4157	URPHOS-RXN_f	10.1866	24.9813	0.40777	1
trifluridine	Uridine phosphorylase	2.4.2.-	no prediction	No	4532	URPHOS-RXN_f	11.1391	25.4197	0.438209	1
			0.481481	0.333333		median	4.56767	25.4421	0.175548	1

## Sheet: Comparison_external_dataset_val
substrate	pcID_substrate	SIMMER_EC	DrugBug_EC	MicrobeFDT_EC	MicrobeFDT_substructure_overlap_EC	MicrobeFDT_toxicity_overlap_EC
methotrexate	126941	3.4.17.11	2.1	no prediction	2.3.1.199	2.1.1.163
dexamethasone	5743	5.3.3.1	1.1	no prediction	3.1.2.2	2.1.1.163
capecitabine	60953	3.1.3.108	3.1	no prediction	no prediction	no prediction
misoprostol	5282381	3.1.4.39	1.14	no prediction	no prediction	no prediction
nicardipine	4474	5.4.99.18	1.14	no prediction	no prediction	no prediction
risperidone	5073	no EC prediction	1.14	no prediction	3.2.1.21	2.1.1.163
spiranolactone	5833	3.1.1.49	1.14	no prediction	no prediction	no prediction
tolcapone	4659569	1.13.11.43	1.2	no prediction	3.1.1.13	2.1.1.163

## Sheet: DrugBug_MicrobeFDT_positive_con
	substrate	characterized bacterial enzyme	pcID_substrate	EC (literature)	SIMMER_EC	SIMMER_enzyme (representative)	DrugBug_EC	DrugBug_enzyme (representative)	MicrobeFDT_EC	MicrobeFDT_substructure_overlap_EC
DrugBug positive controls	Ginsenoside Rb1	Beta-D-glucosidase from Eubacterium sp. A-44	9898279	3.2.1.192	3.2.1.188	Aryl-phospho-beta-D-glucosidase	3.21.21	periplasmic B-glucosidase	no prediction	no prediction
	Quercetin-3-glucoside	Eu. ramulus Beta-glucosidase	5280804	3.2.1.21	3.2.1.21	Aryl-sulfatase	2.4.1.-	glucosyltransferase	no prediction	3.1.1.13
	LoperamideOxide	None	71421	1.14.13.97	1.14.13.237	NA	1.14.-.-	NA	no prediction	no prediction
	Methamphetamine	None	10836	1.14.-.-	1.14.13.8	NA	1.14.-.-	NA	no prediction	3.2.1.21
	Omeprazole	None	4594	1.14.13.-	no prediction	NA	1.14.14.1	NA	no prediction	3.2.1.21
	Sorivudine	BT_4554	5282192	2.7.1.21	2.4.2.2	Purine nucleoside phosphorylase DeoD-type	2.7.1.48	uridine kinase	no prediction	no prediction
	Zonisamide	None	5734	1.14.13.97	no prediction	NA	1.14.12.-	NA	no prediction	3.2.1.21
	Cycasin	Beta-glucosidase	5459896	3.2.1.21	3.2.1.-	Xyloglucanase	3.2.1.23	glycosyl hydrolase	no prediction	no prediction
MicrobeFDT experimental validation	Altretamine	None	2123	1.5.3.4 and various 1.14.-	1.5.1.44	hypothetical protein	2.5	no prediction	no prediction	3.5.3.18

## Sheet: MicrobeFDT_EC
c.name	e.enzymeECnum	e.hmpMetagenomeCount	e.hmpGenomeCount	Cypher Command
dopamine	1.4.3.21	6727	7547	MATCH p=(c:Compound)-[r:METABOLIZED_BY]->(e:Enzyme) WHERE c.cpdID='681' RETURN c.name, e.enzymeECnum, e.hmpMetagenomeCount, e.hmpGenomeCount LIMIT 1
Ketoprofen glucuronide	3.2.1.31	7664	7507	MATCH p=(c:Compound)-[r:METABOLIZED_BY]->(e:Enzyme) WHERE c.cpdID='131281' RETURN c.name, e.enzymeECnum, e.hmpMetagenomeCount, e.hmpGenomeCount LIMIT 1
levodopa	1.13.11.29	0	0	MATCH p=(c:Compound)-[r:METABOLIZED_BY]->(e:Enzyme) WHERE c.cpdID='6047' RETURN c.name, e.enzymeECnum, e.hmpMetagenomeCount, e.hmpGenomeCount LIMIT 1
SN-38 Glucuronide	3.2.1.31	7664	7507	MATCH p=(c:Compound)-[r:METABOLIZED_BY]->(e:Enzyme) WHERE c.cpdID='443154' RETURN c.name, e.enzymeECnum, e.hmpMetagenomeCount, e.hmpGenomeCount LIMIT 1

## Sheet: MicrobeFDT_substructure_overlap
c.name	c1.name	e.enzymeECnum	e.hmpMetagenomeCount	e.hmpGenomeCount	Cypher Command
5-Aminosalicylic acid	linolenic acid	3.1.2.2	3166	148	MATCH p=(c:Compound)-[:HAS_SUBSTRUCTURE_OVERLAP_WITH]->(c1:Compound)<-[r:METABOLIZED_BY]->(e:Enzyme) WHERE c.cpdID='4075' RETURN c.name, c1.name, e.enzymeECnum, e.hmpMetagenomeCount, e.hmpGenomeCount LIMIT 1
5-Aminosalicylic acid	linolenic acid	3.1.2.3	3166	148	MATCH p=(c:Compound)-[:HAS_SUBSTRUCTURE_OVERLAP_WITH]->(c1:Compound)<-[r:METABOLIZED_BY]->(e:Enzyme) WHERE c.cpdID='4649' RETURN c.name, c1.name, e.enzymeECnum, e.hmpMetagenomeCount, e.hmpGenomeCount LIMIT 1
5-Fluorouracil	Ne Ne dimethyllysine	2.1.1.59	39	48	MATCH p=(c:Compound)-[:HAS_SUBSTRUCTURE_OVERLAP_WITH]->(c1:Compound)<-[r:METABOLIZED_BY]->(e:Enzyme) WHERE c.cpdID='3385' RETURN c.name, c1.name, e.enzymeECnum, e.hmpMetagenomeCount, e.hmpGenomeCount LIMIT 1
chloramphenicol	2-Coumarinate	3.2.1.21	9484	31240	MATCH p=(c:Compound)-[:HAS_SUBSTRUCTURE_OVERLAP_WITH]->(c1:Compound)<-[r:METABOLIZED_BY]->(e:Enzyme) WHERE c.cpdID='5959' RETURN c.name, c1.name, e.enzymeECnum, e.hmpMetagenomeCount, e.hmpGenomeCount LIMIT 1
Clonazepam	2-Coumarinate	3.2.1.21	9484	31240	MATCH p=(c:Compound)-[:HAS_SUBSTRUCTURE_OVERLAP_WITH]->(c1:Compound)<-[r:METABOLIZED_BY]->(e:Enzyme) WHERE c.cpdID='2802' RETURN c.name, c1.name, e.enzymeECnum, e.hmpMetagenomeCount, e.hmpGenomeCount LIMIT 1
Diclofenac Acyl Glucuronide	N-Choloylglycine	3.5.1.24	6839	17153	MATCH p=(c:Compound)-[:HAS_SUBSTRUCTURE_OVERLAP_WITH]->(c1:Compound)<-[r:METABOLIZED_BY]->(e:Enzyme) WHERE c.cpdID='16084218' RETURN c.name, c1.name, e.enzymeECnum, e.hmpMetagenomeCount, e.hmpGenomeCount LIMIT 1
digoxin	N-Choloylglycine	3.5.1.24	6839	17153	MATCH p=(c:Compound)-[:HAS_SUBSTRUCTURE_OVERLAP_WITH]->(c1:Compound)<-[r:METABOLIZED_BY]->(e:Enzyme) WHERE c.cpdID='2724385' RETURN c.name, c1.name, e.enzymeECnum, e.hmpMetagenomeCount, e.hmpGenomeCount LIMIT 1
dopamine	linolenic acid	3.1.2.2	3166	148	MATCH p=(c:Compound)-[:HAS_SUBSTRUCTURE_OVERLAP_WITH]->(c1:Compound)<-[r:METABOLIZED_BY]->(e:Enzyme) WHERE c.cpdID='681' RETURN c.name, c1.name, e.enzymeECnum, e.hmpMetagenomeCount, e.hmpGenomeCount LIMIT 1
Ketoprofen glucuronide	N-Choloylglycine	3.5.1.24	6839	17153	MATCH p=(c:Compound)-[:HAS_SUBSTRUCTURE_OVERLAP_WITH]->(c1:Compound)<-[r:METABOLIZED_BY]->(e:Enzyme) WHERE c.cpdID='131281' RETURN c.name, c1.name, e.enzymeECnum, e.hmpMetagenomeCount, e.hmpGenomeCount LIMIT 1
levodopa	linolenic acid	3.1.2.2	3166	148	MATCH p=(c:Compound)-[:HAS_SUBSTRUCTURE_OVERLAP_WITH]->(c1:Compound)<-[r:METABOLIZED_BY]->(e:Enzyme) WHERE c.cpdID='6047' RETURN c.name, c1.name, e.enzymeECnum, e.hmpMetagenomeCount, e.hmpGenomeCount LIMIT 1
SN-38 Glucuronide	3-Oxostearoyl-CoA	2.3.1.199	3139	466	MATCH p=(c:Compound)-[:HAS_SUBSTRUCTURE_OVERLAP_WITH]->(c1:Compound)<-[r:METABOLIZED_BY]->(e:Enzyme) WHERE c.cpdID='443154' RETURN c.name, c1.name, e.enzymeECnum, e.hmpMetagenomeCount, e.hmpGenomeCount LIMIT 1
Sulfasalazine	2-Coumarinate	3.2.1.21	9484	31240	MATCH p=(c:Compound)-[:HAS_SUBSTRUCTURE_OVERLAP_WITH]->(c1:Compound)<-[r:METABOLIZED_BY]->(e:Enzyme) WHERE c.cpdID='5339' RETURN c.name, c1.name, e.enzymeECnum, e.hmpMetagenomeCount, e.hmpGenomeCount LIMIT 1
hydrocortisone	Androstane-3 17-diol glucuronide	3.2.1.31	7664	7507	MATCH p=(c:Compound)-[:HAS_SUBSTRUCTURE_OVERLAP_WITH]->(c1:Compound)<-[r:METABOLIZED_BY]->(e:Enzyme) WHERE c.cpdID='5754' RETURN c.name, c1.name, e.enzymeECnum, e.hmpMetagenomeCount, e.hmpGenomeCount LIMIT 1
diltiazem	Dopamine glucuronide	3.2.1.31	7664	7507	MATCH p=(c:Compound)-[:HAS_SUBSTRUCTURE_OVERLAP_WITH]->(c1:Compound)<-[r:METABOLIZED_BY]->(e:Enzyme) WHERE c.cpdID='39186' RETURN c.name, c1.name, e.enzymeECnum, e.hmpMetagenomeCount, e.hmpGenomeCount LIMIT 1

## Sheet: MicrobeFDT_Altretamine
c.name	c1.name	e.enzymeECnum	Query
"Altretamine"	"N N-dimethylarginine"	"3.5.3.18"	MATCH p=(c:Compound)-[:HAS_SUBSTRUCTURE_OVERLAP_WITH]->(c1:Compound)<-[r:METABOLIZED_BY]->(e:Enzyme) WHERE c.name='Altretamine' RETURN c.name, c1.name, e.enzymeECnum, e.hmpMetagenomeCount, e.hmpGenomeCount
"Altretamine"	"paraxanthine"	"2.3.1.5"	MATCH p=(c:Compound)-[:HAS_SUBSTRUCTURE_OVERLAP_WITH]->(c1:Compound)<-[r:METABOLIZED_BY]->(e:Enzyme) WHERE c.name='Altretamine' RETURN c.name, c1.name, e.enzymeECnum, e.hmpMetagenomeCount, e.hmpGenomeCount
"Altretamine"	"Phylloquinone"	"2.1.1.163"	MATCH p=(c:Compound)-[:HAS_TOX_OVERLAP_WITH]->(c1:Compound)<-[r:METABOLIZED_BY]->(e:Enzyme) WHERE c.name='Altretamine' RETURN c.name, c1.name, e.enzymeECnum, e.ec_class
"Altretamine"	"Phylloquinone"	"1.6.5.2"	MATCH p=(c:Compound)-[:HAS_TOX_OVERLAP_WITH]->(c1:Compound)<-[r:METABOLIZED_BY]->(e:Enzyme) WHERE c.name='Altretamine' RETURN c.name, c1.name, e.enzymeECnum, e.ec_class
"Altretamine"	"adenosine"	"3.5.4.4"	MATCH p=(c:Compound)-[:HAS_TOX_OVERLAP_WITH]->(c1:Compound)<-[r:METABOLIZED_BY]->(e:Enzyme) WHERE c.name='Altretamine' RETURN c.name, c1.name, e.enzymeECnum, e.ec_class
"Altretamine"	"adenosine"	"3.3.1.1"	MATCH p=(c:Compound)-[:HAS_TOX_OVERLAP_WITH]->(c1:Compound)<-[r:METABOLIZED_BY]->(e:Enzyme) WHERE c.name='Altretamine' RETURN c.name, c1.name, e.enzymeECnum, e.ec_class
"Altretamine"	"adenosine"	"3.2.2.8"	MATCH p=(c:Compound)-[:HAS_TOX_OVERLAP_WITH]->(c1:Compound)<-[r:METABOLIZED_BY]->(e:Enzyme) WHERE c.name='Altretamine' RETURN c.name, c1.name, e.enzymeECnum, e.ec_class
"Altretamine"	"adenosine"	"3.2.2.1"	MATCH p=(c:Compound)-[:HAS_TOX_OVERLAP_WITH]->(c1:Compound)<-[r:METABOLIZED_BY]->(e:Enzyme) WHERE c.name='Altretamine' RETURN c.name, c1.name, e.enzymeECnum, e.ec_class
"Altretamine"	"adenosine"	"3.1.3.6"	MATCH p=(c:Compound)-[:HAS_TOX_OVERLAP_WITH]->(c1:Compound)<-[r:METABOLIZED_BY]->(e:Enzyme) WHERE c.name='Altretamine' RETURN c.name, c1.name, e.enzymeECnum, e.ec_class
"Altretamine"	"adenosine"	"3.1.3.5"	MATCH p=(c:Compound)-[:HAS_TOX_OVERLAP_WITH]->(c1:Compound)<-[r:METABOLIZED_BY]->(e:Enzyme) WHERE c.name='Altretamine' RETURN c.name, c1.name, e.enzymeECnum, e.ec_class
"Altretamine"	"adenosine"	"2.7.1.74"	MATCH p=(c:Compound)-[:HAS_TOX_OVERLAP_WITH]->(c1:Compound)<-[r:METABOLIZED_BY]->(e:Enzyme) WHERE c.name='Altretamine' RETURN c.name, c1.name, e.enzymeECnum, e.ec_class
"Altretamine"	"adenosine"	"2.7.1.20"	MATCH p=(c:Compound)-[:HAS_TOX_OVERLAP_WITH]->(c1:Compound)<-[r:METABOLIZED_BY]->(e:Enzyme) WHERE c.name='Altretamine' RETURN c.name, c1.name, e.enzymeECnum, e.ec_class
"Altretamine"	"adenosine"	"2.4.2.1"	MATCH p=(c:Compound)-[:HAS_TOX_OVERLAP_WITH]->(c1:Compound)<-[r:METABOLIZED_BY]->(e:Enzyme) WHERE c.name='Altretamine' RETURN c.name, c1.name, e.enzymeECnum, e.ec_class
"Altretamine"	"L-carnitine"	"2.8.3.21"	MATCH p=(c:Compound)-[:HAS_TOX_OVERLAP_WITH]->(c1:Compound)<-[r:METABOLIZED_BY]->(e:Enzyme) WHERE c.name='Altretamine' RETURN c.name, c1.name, e.enzymeECnum, e.ec_class
"Altretamine"	"L-arginine"	"6.1.1.19"	MATCH p=(c:Compound)-[:HAS_TOX_OVERLAP_WITH]->(c1:Compound)<-[r:METABOLIZED_BY]->(e:Enzyme) WHERE c.name='Altretamine' RETURN c.name, c1.name, e.enzymeECnum, e.ec_class
"Altretamine"	"L-arginine"	"5.1.1.9"	MATCH p=(c:Compound)-[:HAS_TOX_OVERLAP_WITH]->(c1:Compound)<-[r:METABOLIZED_BY]->(e:Enzyme) WHERE c.name='Altretamine' RETURN c.name, c1.name, e.enzymeECnum, e.ec_class
"Altretamine"	"L-arginine"	"4.3.2.1"	MATCH p=(c:Compound)-[:HAS_TOX_OVERLAP_WITH]->(c1:Compound)<-[r:METABOLIZED_BY]->(e:Enzyme) WHERE c.name='Altretamine' RETURN c.name, c1.name, e.enzymeECnum, e.ec_class
"Altretamine"	"L-arginine"	"4.1.1.19"	MATCH p=(c:Compound)-[:HAS_TOX_OVERLAP_WITH]->(c1:Compound)<-[r:METABOLIZED_BY]->(e:Enzyme) WHERE c.name='Altretamine' RETURN c.name, c1.name, e.enzymeECnum, e.ec_class
"Altretamine"	"L-arginine"	"3.5.3.6"	MATCH p=(c:Compound)-[:HAS_TOX_OVERLAP_WITH]->(c1:Compound)<-[r:METABOLIZED_BY]->(e:Enzyme) WHERE c.name='Altretamine' RETURN c.name, c1.name, e.enzymeECnum, e.ec_class
"Altretamine"	"L-arginine"	"3.5.3.1"	MATCH p=(c:Compound)-[:HAS_TOX_OVERLAP_WITH]->(c1:Compound)<-[r:METABOLIZED_BY]->(e:Enzyme) WHERE c.name='Altretamine' RETURN c.name, c1.name, e.enzymeECnum, e.ec_class
"Altretamine"	"L-arginine"	"2.6.1.84"	MATCH p=(c:Compound)-[:HAS_TOX_OVERLAP_WITH]->(c1:Compound)<-[r:METABOLIZED_BY]->(e:Enzyme) WHERE c.name='Altretamine' RETURN c.name, c1.name, e.enzymeECnum, e.ec_class
"Altretamine"	"L-arginine"	"2.3.1.109"	MATCH p=(c:Compound)-[:HAS_TOX_OVERLAP_WITH]->(c1:Compound)<-[r:METABOLIZED_BY]->(e:Enzyme) WHERE c.name='Altretamine' RETURN c.name, c1.name, e.enzymeECnum, e.ec_class
"Altretamine"	"L-arginine"	"2.1.4.1"	MATCH p=(c:Compound)-[:HAS_TOX_OVERLAP_WITH]->(c1:Compound)<-[r:METABOLIZED_BY]->(e:Enzyme) WHERE c.name='Altretamine' RETURN c.name, c1.name, e.enzymeECnum, e.ec_class
"Altretamine"	"L-arginine"	"1.14.13.39"	MATCH p=(c:Compound)-[:HAS_TOX_OVERLAP_WITH]->(c1:Compound)<-[r:METABOLIZED_BY]->(e:Enzyme) WHERE c.name='Altretamine' RETURN c.name, c1.name, e.enzymeECnum, e.ec_class
"Altretamine"	"L-tryptophan"	"6.1.1.2"	MATCH p=(c:Compound)-[:HAS_TOX_OVERLAP_WITH]->(c1:Compound)<-[r:METABOLIZED_BY]->(e:Enzyme) WHERE c.name='Altretamine' RETURN c.name, c1.name, e.enzymeECnum, e.ec_class
"Altretamine"	"L-tryptophan"	"4.2.1.20"	MATCH p=(c:Compound)-[:HAS_TOX_OVERLAP_WITH]->(c1:Compound)<-[r:METABOLIZED_BY]->(e:Enzyme) WHERE c.name='Altretamine' RETURN c.name, c1.name, e.enzymeECnum, e.ec_class
"Altretamine"	"L-tryptophan"	"4.1.99.1"	MATCH p=(c:Compound)-[:HAS_TOX_OVERLAP_WITH]->(c1:Compound)<-[r:METABOLIZED_BY]->(e:Enzyme) WHERE c.name='Altretamine' RETURN c.name, c1.name, e.enzymeECnum, e.ec_class
"Altretamine"	"L-tryptophan"	"2.6.1.88"	MATCH p=(c:Compound)-[:HAS_TOX_OVERLAP_WITH]->(c1:Compound)<-[r:METABOLIZED_BY]->(e:Enzyme) WHERE c.name='Altretamine' RETURN c.name, c1.name, e.enzymeECnum, e.ec_class
"Altretamine"	"L-tryptophan"	"1.13.11.52"	MATCH p=(c:Compound)-[:HAS_TOX_OVERLAP_WITH]->(c1:Compound)<-[r:METABOLIZED_BY]->(e:Enzyme) WHERE c.name='Altretamine' RETURN c.name, c1.name, e.enzymeECnum, e.ec_class
"Altretamine"	"L-tryptophan"	"1.13.11.11"	MATCH p=(c:Compound)-[:HAS_TOX_OVERLAP_WITH]->(c1:Compound)<-[r:METABOLIZED_BY]->(e:Enzyme) WHERE c.name='Altretamine' RETURN c.name, c1.name, e.enzymeECnum, e.ec_class
"Altretamine"	"D-mannitol"	"1.1.1.67"	MATCH p=(c:Compound)-[:HAS_TOX_OVERLAP_WITH]->(c1:Compound)<-[r:METABOLIZED_BY]->(e:Enzyme) WHERE c.name='Altretamine' RETURN c.name, c1.name, e.enzymeECnum, e.ec_class
"Altretamine"	"D-mannitol"	"1.1.1.11"	MATCH p=(c:Compound)-[:HAS_TOX_OVERLAP_WITH]->(c1:Compound)<-[r:METABOLIZED_BY]->(e:Enzyme) WHERE c.name='Altretamine' RETURN c.name, c1.name, e.enzymeECnum, e.ec_class
"Altretamine"	"folic acid"	"1.5.1.3"	MATCH p=(c:Compound)-[:HAS_TOX_OVERLAP_WITH]->(c1:Compound)<-[r:METABOLIZED_BY]->(e:Enzyme) WHERE c.name='Altretamine' RETURN c.name, c1.name, e.enzymeECnum, e.ec_class
"Altretamine"	"testosterone"	"1.1.1.64"	MATCH p=(c:Compound)-[:HAS_TOX_OVERLAP_WITH]->(c1:Compound)<-[r:METABOLIZED_BY]->(e:Enzyme) WHERE c.name='Altretamine' RETURN c.name, c1.name, e.enzymeECnum, e.ec_class
"Altretamine"	"L-glutamine"	"6.3.5.9"	MATCH p=(c:Compound)-[:HAS_TOX_OVERLAP_WITH]->(c1:Compound)<-[r:METABOLIZED_BY]->(e:Enzyme) WHERE c.name='Altretamine' RETURN c.name, c1.name, e.enzymeECnum, e.ec_class
"Altretamine"	"L-glutamine"	"6.3.5.7"	MATCH p=(c:Compound)-[:HAS_TOX_OVERLAP_WITH]->(c1:Compound)<-[r:METABOLIZED_BY]->(e:Enzyme) WHERE c.name='Altretamine' RETURN c.name, c1.name, e.enzymeECnum, e.ec_class
"Altretamine"	"L-glutamine"	"6.3.5.6"	MATCH p=(c:Compound)-[:HAS_TOX_OVERLAP_WITH]->(c1:Compound)<-[r:METABOLIZED_BY]->(e:Enzyme) WHERE c.name='Altretamine' RETURN c.name, c1.name, e.enzymeECnum, e.ec_class
"Altretamine"	"L-glutamine"	"6.3.5.5"	MATCH p=(c:Compound)-[:HAS_TOX_OVERLAP_WITH]->(c1:Compound)<-[r:METABOLIZED_BY]->(e:Enzyme) WHERE c.name='Altretamine' RETURN c.name, c1.name, e.enzymeECnum, e.ec_class
"Altretamine"	"L-glutamine"	"6.3.5.4"	MATCH p=(c:Compound)-[:HAS_TOX_OVERLAP_WITH]->(c1:Compound)<-[r:METABOLIZED_BY]->(e:Enzyme) WHERE c.name='Altretamine' RETURN c.name, c1.name, e.enzymeECnum, e.ec_class
"Altretamine"	"L-glutamine"	"6.3.5.3"	MATCH p=(c:Compound)-[:HAS_TOX_OVERLAP_WITH]->(c1:Compound)<-[r:METABOLIZED_BY]->(e:Enzyme) WHERE c.name='Altretamine' RETURN c.name, c1.name, e.enzymeECnum, e.ec_class
"Altretamine"	"L-glutamine"	"6.3.5.2"	MATCH p=(c:Compound)-[:HAS_TOX_OVERLAP_WITH]->(c1:Compound)<-[r:METABOLIZED_BY]->(e:Enzyme) WHERE c.name='Altretamine' RETURN c.name, c1.name, e.enzymeECnum, e.ec_class
"Altretamine"	"L-glutamine"	"6.3.5.11"	MATCH p=(c:Compound)-[:HAS_TOX_OVERLAP_WITH]->(c1:Compound)<-[r:METABOLIZED_BY]->(e:Enzyme) WHERE c.name='Altretamine' RETURN c.name, c1.name, e.enzymeECnum, e.ec_class
"Altretamine"	"L-glutamine"	"6.3.5.10"	MATCH p=(c:Compound)-[:HAS_TOX_OVERLAP_WITH]->(c1:Compound)<-[r:METABOLIZED_BY]->(e:Enzyme) WHERE c.name='Altretamine' RETURN c.name, c1.name, e.enzymeECnum, e.ec_class
"Altretamine"	"L-glutamine"	"6.3.5.1"	MATCH p=(c:Compound)-[:HAS_TOX_OVERLAP_WITH]->(c1:Compound)<-[r:METABOLIZED_BY]->(e:Enzyme) WHERE c.name='Altretamine' RETURN c.name, c1.name, e.enzymeECnum, e.ec_class
"Altretamine"	"L-glutamine"	"6.3.4.2"	MATCH p=(c:Compound)-[:HAS_TOX_OVERLAP_WITH]->(c1:Compound)<-[r:METABOLIZED_BY]->(e:Enzyme) WHERE c.name='Altretamine' RETURN c.name, c1.name, e.enzymeECnum, e.ec_class
"Altretamine"	"L-glutamine"	"6.3.1.2"	MATCH p=(c:Compound)-[:HAS_TOX_OVERLAP_WITH]->(c1:Compound)<-[r:METABOLIZED_BY]->(e:Enzyme) WHERE c.name='Altretamine' RETURN c.name, c1.name, e.enzymeECnum, e.ec_class
"Altretamine"	"L-glutamine"	"6.1.1.18"	MATCH p=(c:Compound)-[:HAS_TOX_OVERLAP_WITH]->(c1:Compound)<-[r:METABOLIZED_BY]->(e:Enzyme) WHERE c.name='Altretamine' RETURN c.name, c1.name, e.enzymeECnum, e.ec_class
"Altretamine"	"L-glutamine"	"4.3.3.6"	MATCH p=(c:Compound)-[:HAS_TOX_OVERLAP_WITH]->(c1:Compound)<-[r:METABOLIZED_BY]->(e:Enzyme) WHERE c.name='Altretamine' RETURN c.name, c1.name, e.enzymeECnum, e.ec_class
"Altretamine"	"L-glutamine"	"4.1.3.27"	MATCH p=(c:Compound)-[:HAS_TOX_OVERLAP_WITH]->(c1:Compound)<-[r:METABOLIZED_BY]->(e:Enzyme) WHERE c.name='Altretamine' RETURN c.name, c1.name, e.enzymeECnum, e.ec_class
"Altretamine"	"L-glutamine"	"3.5.1.38"	MATCH p=(c:Compound)-[:HAS_TOX_OVERLAP_WITH]->(c1:Compound)<-[r:METABOLIZED_BY]->(e:Enzyme) WHERE c.name='Altretamine' RETURN c.name, c1.name, e.enzymeECnum, e.ec_class
"Altretamine"	"L-glutamine"	"3.5.1.2"	MATCH p=(c:Compound)-[:HAS_TOX_OVERLAP_WITH]->(c1:Compound)<-[r:METABOLIZED_BY]->(e:Enzyme) WHERE c.name='Altretamine' RETURN c.name, c1.name, e.enzymeECnum, e.ec_class
"Altretamine"	"L-glutamine"	"2.6.1.85"	MATCH p=(c:Compound)-[:HAS_TOX_OVERLAP_WITH]->(c1:Compound)<-[r:METABOLIZED_BY]->(e:Enzyme) WHERE c.name='Altretamine' RETURN c.name, c1.name, e.enzymeECnum, e.ec_class
"Altretamine"	"L-glutamine"	"2.6.1.50"	MATCH p=(c:Compound)-[:HAS_TOX_OVERLAP_WITH]->(c1:Compound)<-[r:METABOLIZED_BY]->(e:Enzyme) WHERE c.name='Altretamine' RETURN c.name, c1.name, e.enzymeECnum, e.ec_class
"Altretamine"	"L-glutamine"	"2.6.1.16"	MATCH p=(c:Compound)-[:HAS_TOX_OVERLAP_WITH]->(c1:Compound)<-[r:METABOLIZED_BY]->(e:Enzyme) WHERE c.name='Altretamine' RETURN c.name, c1.name, e.enzymeECnum, e.ec_class
"Altretamine"	"L-glutamine"	"2.4.2.14"	MATCH p=(c:Compound)-[:HAS_TOX_OVERLAP_WITH]->(c1:Compound)<-[r:METABOLIZED_BY]->(e:Enzyme) WHERE c.name='Altretamine' RETURN c.name, c1.name, e.enzymeECnum, e.ec_class
"Altretamine"	"L-glutamine"	"1.4.1.14"	MATCH p=(c:Compound)-[:HAS_TOX_OVERLAP_WITH]->(c1:Compound)<-[r:METABOLIZED_BY]->(e:Enzyme) WHERE c.name='Altretamine' RETURN c.name, c1.name, e.enzymeECnum, e.ec_class
"Altretamine"	"L-glutamine"	"1.4.1.13"	MATCH p=(c:Compound)-[:HAS_TOX_OVERLAP_WITH]->(c1:Compound)<-[r:METABOLIZED_BY]->(e:Enzyme) WHERE c.name='Altretamine' RETURN c.name, c1.name, e.enzymeECnum, e.ec_class
"Altretamine"	"lansoprazole"	"3.2.1.21"	MATCH p=(c:Compound)-[:HAS_TOX_OVERLAP_WITH]->(c1:Compound)<-[r:METABOLIZED_BY]->(e:Enzyme) WHERE c.name='Altretamine' RETURN c.name, c1.name, e.enzymeECnum, e.ec_class
"Altretamine"	"isoniazid"	"3.1.1.1"	MATCH p=(c:Compound)-[:HAS_TOX_OVERLAP_WITH]->(c1:Compound)<-[r:METABOLIZED_BY]->(e:Enzyme) WHERE c.name='Altretamine' RETURN c.name, c1.name, e.enzymeECnum, e.ec_class
"Altretamine"	"isoniazid"	"2.3.1.5"	MATCH p=(c:Compound)-[:HAS_TOX_OVERLAP_WITH]->(c1:Compound)<-[r:METABOLIZED_BY]->(e:Enzyme) WHERE c.name='Altretamine' RETURN c.name, c1.name, e.enzymeECnum, e.ec_class
"Altretamine"	"isoniazid"	"1.11.1.21"	MATCH p=(c:Compound)-[:HAS_TOX_OVERLAP_WITH]->(c1:Compound)<-[r:METABOLIZED_BY]->(e:Enzyme) WHERE c.name='Altretamine' RETURN c.name, c1.name, e.enzymeECnum, e.ec_class

## Sheet: DrugBug_brivudine
EC	Microbes	Proteins	Identity	Q-coverage	E-value
2.7.1.21	Lactobacillus_buchneri_ATCC_11577	HMPREF0497_2176_thymidine_kinase	73.4	85.39	7e-107
2.7.1.21	Enterococcus_faecalis_TX2134	HMPREF9521_02419_thymidine_kinase	99.48	99.48	2e-145
2.7.1.21	Enterococcus_faecalis_TX0104	HMPREF0348_2742_thymidine_kinase	99.48	99.48	2e-145
2.7.1.21	Lactobacillus_reuteri_CF48-3A	HMPREF0534_1095_thymidine_kinase	74.87	97.38	3e-106
2.7.1.21	Bacteroides_sp._4_1_36	HMPREF1007_03411_thymidine_kinase	90.95	92.96	3e-137
2.7.1.21	Proteus_mirabilis_WGLW6	HMPREF1311_01462_thymidine_kinase	75.26	97.47	2e-108
2.7.1.21	Staphylococcus_sp._HGB0015	HMPREF1208_02245_thymidine_kinase	80.2	98	2e-122
2.7.1.21	Escherichia_coli_MS_69-1	HMPREF9534_04411_thymidine_kinase	100	99.51	6e-154
2.7.1.21	Lactobacillus_ruminis_ATCC_25644	HMPREF0542_10657_thymidine_kinase	80.85	90.34	7e-118
2.7.1.21	Paenibacillus_sp._HGH0039	HMPREF1207_03176_hypothetical_protein	60.33	94.27	6e-82
2.7.1.21	Enterococcus_faecium_TX1330	HMPREF0352_2416_thymidine_kinase	84.9	90.09	6e-126
2.7.1.21	Clostridium_sp._HGF2	HMPREF9406_1793_thymidine_kinase	63.02	96.95	9e-91
2.7.1.21	Propionibacterium_sp._5_U_42AFAA	HMPREF1003_01545_thymidine_kinase	100	99.54	9e-148
2.7.1.21	Escherichia_coli_MS_187-1	HMPREF9550_00120_thymidine_kinase	99.51	99.51	2e-153
2.7.1.21	Escherichia_coli_MS_16-3	HMPREF9545_03667_thymidine_kinase	100	99.51	6e-154
2.7.1.21	Providencia_rettgeri_DSM_1131	PROVRETT_05600_thymidine_kinase	75.77	92.34	1e-113
2.7.1.21	Parabacteroides_distasonis_ATCC_8503_uid58301	gi|150007356|ref|YP_001302099.1|	80.1	96.94	7e-103
2.7.1.21	Lactobacillus_sp._7_1_47FAA	HMPREF1027_00307_thymidine_kinase	79.7	99.49	4e-117
2.7.1.21	Enterococcus_faecium_PC4.1	CUO_0932_thymidine_kinase	84.9	98.45	8e-126
2.7.1.21	Holdemania_filiformis_DSM_12042	HOLDEFILI_01019_thymidine_kinase	59.38	94.55	2e-86
2.7.1.21	Bacteroides_finegoldii_DSM_17565	BACFIN_08958_thymidine_kinase	93.97	99.5	7e-140
2.7.1.21	Escherichia_sp._4_1_40B	ESBG_01447_thymidine_kinase	100	99.51	5e-154
2.7.1.21	Escherichia_coli_MS_198-1	HMPREF9552_00436_thymidine_kinase	100	99.51	6e-154
2.7.1.21	Bacteroides_ovatus_ATCC_8483	BACOVA_03071_thymidine_kinase	96.48	99.5	2e-142
2.7.1.21	Escherichia_coli_MS_116-1	HMPREF9541_05253_thymidine_kinase	100	99.51	5e-154
2.7.1.21	Bacteroides_sp._9_1_42FAA	BSBG_03315_thymidine_kinase	96.48	99.5	2e-143
2.7.1.21	Bacteroides_thetaiotaomicron_VPI-5482	sp|Q8A5G4|KITH_BACTN	100	99.5	4e-147
2.7.1.21	Escherichia_coli_MS_185-1	HMPREF9549_00990_thymidine_kinase	100	99.51	6e-154
2.7.1.21	Bacteroides_cellulosilyticus_DSM_14838	BACCELL_03218_thymidine_kinase	90.31	97.01	3e-125
2.7.1.21	Escherichia_coli_MS_107-1	HMPREF9345_04777_thymidine_kinase	100	99.51	5e-154
2.7.1.21	Odoribacter_laneus_YIT_12061	HMPREF9449_01584_hypothetical_protein	66.84	92.65	2e-94
2.7.1.21	Subdoligranulum_variabile_DSM_15176	SUBVAR_05505_thymidine_kinase	46.32	91.67	4e-50
2.7.1.21	Paenibacillus_sp._HGF7	HMPREF9413_0611_thymidine_kinase	60.33	94.27	6e-82
2.7.1.21	Streptomyces_sp._HPH0547	HMPREF1486_03425_thymidine_kinase	79.34	89.08	2e-108
2.7.1.21	Bacteroides_sp._3_1_23	HMPREF9010_03480_thymidine_kinase	96.48	99.5	2e-142
2.7.1.21	Bifidobacterium_gallicum_DSM_20093_=_LMG_11596	BIFGAL_03331_thymidine_kinase	41.58	95.41	6e-50
2.7.1.21	Escherichia_coli_CFT073_uid57915	gi|26247568|ref|NP_753608.1|	100	99.51	6e-154
2.7.1.21	Bacteroides_sp._1_1_6	BSIG_4559_thymidine_kinase	100	99.43	1e-128
2.7.1.21	Bacteroides_sp._3_2_5	BSHG_0997_thymidine_kinase	100	99.5	1e-134
2.7.1.21	Citrobacter_freundii_4_7_47CFAA	HMPREF9428_01543_thymidine_kinase	92.57	99.43	1e-118
2.7.1.21	Escherichia_coli_MS_145-7	HMPREF9348_01516_thymidine_kinase	99.51	99.51	1e-152
2.7.1.21	Bacteroides_fluxus_YIT_12057	HMPREF9446_01395_thymidine_kinase	91.79	96.52	4e-126
2.7.1.21	Escherichia_coli_MS_117-3	HMPREF9542_02348_thymidine_kinase	100	99.51	5e-154
2.7.1.21	Lactobacillus_rhamnosus_GG	LRHM_1116_thymidine_kinase	78.72	94.92	2e-115
2.7.1.21	Subdoligranulum_sp._4_3_54A2FAA	HMPREF1032_00979_hypothetical_protein	46.63	89.62	1e-48
2.7.1.21	Escherichia_sp._1_1_43	ESCG_03273_thymidine_kinase	99.51	99.51	2e-153
2.7.1.21	Escherichia_coli_MS_153-1	HMPREF9544_04885_thymidine_kinase	100	99.51	6e-154
2.7.1.21	Escherichia_coli_MS_84-1	HMPREF9536_02256_thymidine_kinase	99.51	99.51	2e-153
2.7.1.21	Providencia_stuartii_ATCC_25827	PROSTU_02757_thymidine_kinase	77.32	92.34	2e-115
2.7.1.21	Bacillus_smithii_7_3_47FAA	HMPREF1015_02554_thymidine_kinase	73.76	97.1	5e-111
2.7.1.21	Lactobacillus_paracasei_subsp._paracasei_ATCC_25302	HMPREF0530_2653_thymidine_kinase	79.26	95.41	1e-115
2.7.1.21	Erysipelotrichaceae_bacterium_6_1_45	HMPREF0981_02914_hypothetical_protein	63.02	96.95	9e-91
2.7.1.21	Hafnia_alvei_ATCC_51873	HMPREF0454_02678_thymidine_kinase	80.66	99.45	5e-109
2.7.1.21	Enterococcus_faecalis_TX1346	HMPREF9519_02517_thymidine_kinase	99.48	99.48	2e-145
2.7.1.21	Streptococcus_anginosus_1_2_62CV	HMPREF9459_00487_thymidine_kinase	86.32	97.42	3e-124
2.7.1.21	Escherichia_coli_MS_115-1	HMPREF9540_03449_thymidine_kinase	99.51	99.51	4e-153
2.7.1.21	Escherichia_coli_MS_78-1	HMPREF9535_01948_thymidine_kinase	100	99.51	5e-154
2.7.1.21	Escherichia_coli_S88_uid62979	gi|218558166|ref|YP_002391079.1|	100	99.51	6e-154
2.7.1.21	Lactobacillus_helveticus_DSM_20075	HMPREF0518_1300_thymidine_kinase	91.96	99.5	3e-140
2.7.1.21	Klebsiella_sp._1_1_55	HMPREF0485_00768_thymidine_kinase	88.06	97.56	1e-132
2.7.1.21	Bacteroides_sp._3_1_19	HMPREF0104_01512_thymidine_kinase	79.58	96.94	1e-102
2.7.1.21	Dermabacter_sp._HFH0086	HMPREF1484_01534_hypothetical_protein	41.49	91.13	3e-39
2.7.1.21	Bacteroides_plebeius_DSM_17135	BACPLE_02289_thymidine_kinase	83.51	95.54	5e-119
2.7.1.21	Bacteroides_sp._2_1_56FAA	HMPREF1018_00670_thymidine_kinase	100	99.5	1e-134
2.7.1.21	Enterococcus_faecalis_TX4244	HMPREF9497_00367_thymidine_kinase	99.48	99.48	2e-145
2.7.1.21	Lactobacillus_acidophilus_ATCC_4796	HMPREF0492_1111_thymidine_kinase	99.5	95.65	2e-149
2.7.1.21	Escherichia_coli_MS_85-1	HMPREF9350_03299_thymidine_kinase	99.51	99.51	2e-153
2.7.1.21	Butyrivibrio_fibrisolvens_16_4	CIY_26470_thymidine_kinase	48.15	96.81	1e-58
2.7.1.21	Escherichia_coli_MS_21-1	HMPREF9530_04328_thymidine_kinase	100	99.51	6e-154
2.7.1.21	Escherichia_coli_ATCC_8739_uid58783	gi|170020396|ref|YP_001725350.1|	99.51	99.51	2e-153
2.7.1.21	Klebsiella_pneumoniae_342_uid59145	gi|206577024|ref|YP_002237945.1|	88.06	97.56	1e-132
2.7.1.21	Bacteroides_sp._3_1_33FAA	HMPREF0105_3494_thymidine_kinase	96.48	99.5	2e-143
2.7.1.21	Parabacteroides_sp._D13	HMPREF0619_01461_thymidine_kinase	79.58	96.45	3e-102
2.7.1.21	Lactobacillus_antri_DSM_16041	HMPREF0494_1991_thymidine_kinase	77.01	95.38	7e-109
2.7.1.21	Lactobacillus_rhamnosus_LMS2-1	HMPREF0539_1222_thymidine_kinase	78.72	94.92	2e-115
2.7.1.21	Prevotella_stercorea_DSM_18206	HMPREF0673_02089_thymidine_kinase	68.42	94.5	8e-94
2.7.1.21	Lachnospiraceae_bacterium_6_1_63FAA	HMPREF0992_00978_thymidine_kinase	42.71	95.24	5e-53
2.7.1.21	Corynebacterium_sp._HFH0082	HMPREF1206_01920_hypothetical_protein	46.91	88.52	6e-52
2.7.1.21	Lactobacillus__sakei_subsp._sakei_23K	sp|Q38WJ3|KITH_LACSS	100	99.49	1e-147
2.7.1.21	Enterococcus_saccharolyticus_30_1	HMPREF9478_02532_thymidine_kinase	83.33	96.95	1e-124
2.7.1.21	Lactobacillus_reuteri_JCM_1112	LAR_0441_thymidine_kinase	74.87	97.38	3e-106
2.7.1.21	Escherichia_coli_HS_uid58393	gi|157160745|ref|YP_001458063.1|	99.51	99.51	2e-153
2.7.1.21	Escherichia_coli_MS_110-3	HMPREF9539_01407_thymidine_kinase	100	99.51	6e-154
2.7.1.21	Faecalibacterium_prausnitzii_A2-165	FAEPRAA2165_02863_thymidine_kinase	46.11	94.06	2e-52
2.7.1.21	Coprobacillus_sp._3_3_56FAA	HMPREF1021_00140_hypothetical_protein	61.98	97.45	3e-88
2.7.1.21	Lactobacillus_gasseri_ATCC_33323_uid57687	gi|116629884|ref|YP_815056.1|	94.97	99.5	9e-144
2.7.1.21	Escherichia_coli_UTI89_uid58541	gi|91210461|ref|YP_540447.1|	100	99.51	6e-154
2.7.1.21	Streptococcus_infantarius_subsp._infantarius_ATCC_BAA-102	STRINF_01196_thymidine_kinase	89.39	97.27	2e-120
2.7.1.21	Yokenella_regensburgei_ATCC_43003	HMPREF0880_03774_thymidine_kinase	87.75	97.13	2e-134
2.7.1.21	Bacteroides_sp._3_1_40A	HMPREF9011_03589_thymidine_kinase	100	99.5	1e-146
2.7.1.21	Escherichia_coli_MS_57-2	HMPREF9532_04288_thymidine_kinase	100	99.51	6e-154
2.7.1.21	Escherichia_coli_MS_45-1	HMPREF9531_00203_thymidine_kinase	100	99.51	6e-154
2.7.1.21	Enterococcus_faecalis_TX1341	HMPREF9517_00717_thymidine_kinase	99.48	99.48	2e-145
2.7.1.21	Barnesiella_intestinihominis_YIT_11860	HMPREF9448_02116_thymidine_kinase	71.14	99	4e-103
2.7.1.21	Lactobacillus_delbrueckii_subsp._lactis_DSM_20072	HMPREF5505_1757_thymidine_kinase	73.37	94.29	6e-111
2.7.1.21	Bacteroides_sp._2_2_4	BSCG_05125_thymidine_kinase	96.48	99.5	2e-142
2.7.1.21	Klebsiella_pneumoniae_subsp._pneumoniae_WGLW3	HMPREF1307_02303_thymidine_kinase	87.21	97.71	6e-111
2.7.1.21	Prevotella_copri_DSM_18205	PREVCOP_05154_thymidine_kinase	76.68	98.97	2e-111
2.7.1.21	Bacteroides_dorei_DSM_17855	BACDOR_03235_thymidine_kinase	95.98	99.5	4e-143
2.7.1.21	Bacteroides_sp._2_1_22	HMPREF0102_01750_thymidine_kinase	96.48	99.5	2e-142
2.7.1.21	Bacteroides_sp._2_1_16	HMPREF0101_02566_thymidine_kinase	100	99.5	1e-134
2.7.1.21	Paraprevotella_xylaniphila_YIT_11841	HMPREF9442_03105_thymidine_kinase	77.13	93.5	2e-108
2.7.1.21	Eubacterium_sp._3_1_31	HMPREF0984_02831_hypothetical_protein	62.89	96.02	3e-91
2.7.1.21	Escherichia_coli_SMS-3-5	tr|B1LH62|B1LH62_ECOSM	100	99.51	6e-154
2.7.1.21	Escherichia_coli_ED1a_uid59379	gi|218689184|ref|YP_002397396.1|	99.51	99.51	2e-153
2.7.1.21	Enterococcus_casseliflavus_EC20_uid55693	gi|478486451|ref|YP_007754032.1|	85.94	96.95	5e-126
2.7.1.21	Bacteroides_sp._2_1_33B	HMPREF0103_1120_thymidine_kinase	80.1	96.94	7e-103
2.7.1.21	Escherichia_coli_MS_146-1	HMPREF9543_03503_thymidine_kinase	100	99.51	5e-154
2.7.1.21	Bacteroides_sp._HPS0048	HMPREF1214_01203_thymidine_kinase	92.93	98.99	5e-138
2.7.1.21	Bacteroides_sp._D1	BSAG_04159_thymidine_kinase	96.48	99.5	2e-142
2.7.1.21	Bacteroides_fragilis_3_1_12	BFAG_02308_thymidine_kinase	97.99	99.5	8e-146
2.7.1.21	Klebsiella_pneumoniae_subsp._pneumoniae_MGH-78578	tr|A6TAK7|A6TAK7_KLEP7	87.28	98.29	6e-112
2.7.1.21	Tannerella_sp._6_1_58FAA_CT1	HMPREF1033_03011_thymidine_kinase	77.54	95.36	4e-108
2.7.1.21	Escherichia_coli_536_uid58531	gi|110641467|ref|YP_669197.1|	100	99.51	6e-154
2.7.1.21	Pediococcus_acidilactici_7_4	HMPREF9024_01217_thymidine_kinase	79.14	95.88	2e-113
2.7.1.21	Anaerococcus_hydrogenalis_DSM_7454	ANHYDRO_01104_thymidine_kinase	41.59	95.73	8e-28
2.7.1.21	Enterobacteriaceae_bacterium_9_2_54FAA	HMPREF0864_01479_thymidine_kinase	78.26	99.38	4e-93
2.7.1.21	Enterobacter_cancerogenus_ATCC_35316	ENTCAN_06431_thymidine_kinase	84.73	99.02	2e-129
2.7.1.21	Escherichia_coli_MS_182-1	HMPREF9548_04618_thymidine_kinase	100	99.51	5e-154
2.7.1.21	Bacteroides_clarus_YIT_12056	HMPREF9445_02826_thymidine_kinase	89.45	98.51	3e-135
2.7.1.21	Listeria_innocua_ATCC_33091	HMPREF0557_02394_thymidine_kinase	100	88.79	1e-143
2.7.1.21	Cedecea_davisae_DSM_4568	HMPREF0201_02432_thymidine_kinase	85.57	99.5	2e-126
2.7.1.21	Providencia_alcalifaciens_DSM_30120	PROVALCAL_01798_thymidine_kinase	77.84	86.55	2e-114
2.7.1.21	Coprobacillus_sp._8_2_54BFAA	HMPREF0978_02337_hypothetical_protein	61.98	97.45	3e-88
2.7.1.21	Escherichia_coli_MS_79-10	HMPREF9349_02424_thymidine_kinase	100	99.51	5e-154
2.7.1.21	Lactobacillus_brevis_subsp._gravesensis_ATCC_27305	HMPREF0496_2288_thymidine_kinase	72.87	85.39	4e-106
2.7.1.21	Paenisporosarcina_sp._HGH0030	HMPREF1210_01763_thymidine_kinase	77.37	92.65	2e-110
2.7.1.21	Finegoldia_magna_ATCC_29328	FMG_0715_thymidine_kinase	40.96	89.05	3e-47
2.7.1.21	Bacteroides_xylanisolvens_XB1A	BXY_10390_Thymidine_kinase	96.48	99.5	2e-142
2.7.1.21	Escherichia_coli_MS_196-1	HMPREF9551_04053_thymidine_kinase	100	99.43	4e-130
2.7.1.21	Enterococcus_faecalis_TX2137	HMPREF9494_02864_thymidine_kinase	99.48	99.48	2e-145
2.7.1.21	Lactobacillus_fermentum_ATCC_14931	HMPREF0511_0586_thymidine_kinase	72.19	93.47	9e-103
2.7.1.21	Bacteroides_sp._D20	HMPREF0969_01104_thymidine_kinase	90.95	98.51	4e-137
2.7.1.21	Clostridium_sporogenes_ATCC_15579	CLOSPO_00825_thymidine_kinase	100	99.48	3e-130
2.7.1.21	Escherichia_sp._3_2_53FAA	ESAG_01930_thymidine_kinase	100	99.51	6e-154
2.7.1.21	Enterococcus_faecalis_TX1322	HMPREF0349_0292_thymidine_kinase	99.48	99.48	2e-145
2.7.1.21	Bacteroides_oleiciplenus_YIT_12058	HMPREF9447_04389_thymidine_kinase	90.45	98.51	4e-127
2.7.1.21	Escherichia_coli_MS_200-1	HMPREF9553_04758_thymidine_kinase	100	99.51	6e-154
2.7.1.21	Alistipes_shahii_WAL_8301	AL1_27440_Thymidine_kinase	67.91	97.38	8e-96
2.7.1.21	Coprobacillus_sp._D7	MBAG_00191_hypothetical_protein	61.98	97.45	3e-88
2.7.1.21	Ruminococcus_champanellensis_18P13_=_JCM_17042	RUM_06920_thymidine_kinase	43.5	94.92	2e-46
2.7.1.21	Lactobacillus_casei_BL23_uid59237	gi|191638149|ref|YP_001987315.1|	79.26	95.41	1e-115
2.7.1.21	Catenibacterium_mitsuokai_DSM_15897	CATMIT_00634_thymidine_kinase	61.46	91.83	8e-78
2.7.1.21	Bacteroides_caccae_ATCC_43185	BACCAC_02950_thymidine_kinase	95.98	99.5	1e-141
2.7.1.21	Bacteroides_stercoris_ATCC_43183	BACSTE_00456_thymidine_kinase	89.95	98.51	1e-135
2.7.1.21	Lactobacillus_reuteri_MM4-1A	HMPREF0536_10495_thymidine_kinase	74.87	97.38	3e-106
2.7.1.21	Pseudoflavonifractor_capillosus_ATCC_29799	BACCAP_00533_thymidine_kinase	49.74	90.95	7e-63
2.7.1.21	Bacillus_sp._7_6_55CFAA_CT2	HMPREF1014_04299_thymidine_kinase	100	99.49	5e-145
2.7.1.21	Turicibacter_sanguinis_PC909	CUW_2298_thymidine_kinase	61.66	95.52	3e-91
2.7.1.21	Lactobacillus_acidophilus_NCFM_uid57685	gi|58337079|ref|YP_193664.1|	99.5	95.65	2e-149
2.7.1.21	Bacteroides_uniformis_ATCC_8492	BACUNI_02353_thymidine_kinase	90.95	98.51	4e-137
2.7.1.21	Faecalibacterium_prausnitzii_M21_2	FAEPRAM212_03131_thymidine_kinase	46.77	91.04	2e-53
2.7.1.21	Lactobacillus_johnsonii_NCC_533_uid58029	gi|42518854|ref|NP_964784.1|	100	99.5	7e-150
2.7.1.21	Bacteroides_fragilis_NCTC_9343_uid57639	gi|60680149|ref|YP_210293.1|	100	99.5	2e-134
2.7.1.21	Bacteroides_ovatus_3_8_47FAA	HMPREF1017_03962_thymidine_kinase	96.48	99.5	2e-142
2.7.1.21	Lactobacillus_salivarius_UCC118_uid58233	gi|90961565|ref|YP_535481.1|	80.85	93.03	1e-115
2.7.1.21	Faecalibacterium_cf._prausnitzii_KLE1255	HMPREF9436_01812_thymidine_kinase	45.6	92.68	1e-51
2.7.1.21	Escherichia_coli_MS_175-1	HMPREF9547_01756_thymidine_kinase	100	99.51	5e-154
2.7.1.21	Alistipes_putredinis_DSM_17216	ALIPUT_02247_thymidine_kinase	69.31	98.43	7e-97
2.7.1.21	Lactobacillus_brevis_ATCC_367_uid57989	gi|116333900|ref|YP_795427.1|	82.98	96.39	2e-117
2.7.1.21	Lactobacillus_hilgardii_ATCC_8290	HMPREF0519_1978_thymidine_kinase	73.4	85.39	1e-106
2.7.1.21	Clostridium_perfringens_WAL-14572	HMPREF9476_01857_hypothetical_protein	41.94	91.96	1e-42
2.7.1.21	Pediococcus_acidilactici_DSM_20284	HMPREF0623_0774_thymidine_kinase	79.14	95.88	2e-113
2.7.1.21	Streptococcus_sp._2_1_36FAA	HMPREF0847_00650_thymidine_kinase	100	99.48	8e-143
2.7.1.21	Edwardsiella_tarda_ATCC_23685	EDWATA_01680_thymidine_kinase	80.53	96.43	2e-114
2.7.1.21	Escherichia_coli_MS_60-1	HMPREF9533_00195_thymidine_kinase	100	99.51	6e-154
2.7.1.21	Lactobacillus_rhamnosus_ATCC_21052	HMPREF0541_02839_thymidine_kinase	78.72	94.92	2e-115
2.7.1.21	Bacteroides_dorei_5_1_36_D4	BSEG_03243_thymidine_kinase	95.98	88.39	3e-142
2.7.1.21	Citrobacter_youngae_ATCC_29220	CIT292_06869_thymidine_kinase	92.16	89.82	2e-140
2.7.1.21	Streptococcus_sp._HPH0090	HMPREF1481_00536_thymidine_kinase	95.92	98.47	1e-138
2.7.1.21	Clostridium_hathewayi_WAL-18680	HMPREF9473_01152	48.95	97.34	7e-59
2.7.1.21	Streptomyces_sp._HGB0020	HMPREF1211_02217_thymidine_kinase	91.59	98.6	8e-116
2.7.1.21	Anaerofustis_stercorihominis_DSM_17244	ANASTE_01430_thymidine_kinase	59.79	99.47	1e-81
2.7.1.21	Bacteroides_ovatus_SD_CMC_3f	CUY_1865_thymidine_kinase	96.48	99.5	2e-142
2.7.1.21	Klebsiella_sp._MS_92-3	HMPREF9538_04279_thymidine_kinase	89.16	98.54	1e-135
2.7.1.21	Enterococcus_faecalis_TX1467	HMPREF9520_00151_thymidine_kinase	99.48	99.48	2e-145
2.7.1.21	Faecalibacterium_prausnitzii_L2-6	FP2_24240_thymidine_kinase	46.63	95	6e-52
2.7.1.21	Bacteroides_vulgatus_ATCC_8482_uid58253	gi|150004389|ref|YP_001299133.1|	100	99.5	1e-146
2.7.1.21	Flavonifractor_plautii_ATCC_29863	HMPREF0372_02503_thymidine_kinase	48.7	98.41	1e-62
2.7.1.21	Bacteroides_intestinalis_DSM_17393	BACINT_04663_thymidine_kinase	90.31	97.01	7e-125
2.7.1.21	Lactobacillus_plantarum_WCFS1_uid62911	gi|380033088|ref|YP_004890079.1|	100	99.48	5e-145
2.7.1.21	Enterococcus_faecalis_TX1302	HMPREF9516_01432_thymidine_kinase	99.48	99.48	2e-145
2.7.1.21	Enterococcus_faecalis_PC1.1	CUI_2628_thymidine_kinase	99.48	99.48	2e-145
2.7.1.21	Escherichia_coli_IAI39_uid59381	gi|218699944|ref|YP_002407573.1|	100	99.51	6e-154
2.7.1.21	Coprobacillus_sp._29_1	HMPREF9488_03741_thymidine_kinase	62.5	97.45	1e-89
2.7.1.21	Clostridium_sp._7_2_43FAA	CSBG_02875_hypothetical_protein	46.19	99.49	1e-48
2.7.1.21	Lactobacillus_helveticus_DPC_4571_uid58761	gi|161507265|ref|YP_001577219.1|	91.96	99.5	3e-140
2.7.1.21	Paenibacillus_sp._HGF5	HMPREF9412_2445_thymidine_kinase	74.35	99.47	3e-106
2.7.1.21	Escherichia_coli_D9	SSJG_01319_thymidine_kinase	100	99.51	5e-154
2.7.1.21	Bacteroides_coprophilus_DSM_18228_=_JCM_13818	BACCOPRO_02687_thymidine_kinase	78.79	99.49	3e-117
2.7.1.21	Clostridium_celatum_DSM_1785	HMPREF0216_01292_thymidine_kinase	42.86	93.85	9e-48
2.7.1.21	Bacteroides_eggerthii_DSM_20697	BACEGG_00726_thymidine_kinase	88.94	98.02	5e-135
2.7.1.21	Bacteroides_sp._1_1_30	HMPREF0127_00872_thymidine_kinase	96.48	99.5	2e-142
2.7.1.21	Bacteroides_coprocola_DSM_17136	BACCOP_03472_thymidine_kinase	82.08	96.09	6e-106
2.7.1.21	Erysipelotrichaceae_bacterium_2_2_44A	HMPREF9022_02340_thymidine_kinase	63.02	96.95	2e-90
2.7.1.21	Clostridium_asparagiforme_DSM_15981	CLOSTASPAR_02333	48.74	90.61	1e-59
2.7.1.21	Enterococcus_faecalis_TX1342	HMPREF9518_01910_thymidine_kinase	99.48	99.48	2e-145
2.7.1.21	Streptococcus_equinus_ATCC_9812	HMPREF0819_0393_thymidine_kinase	88.27	97.27	8e-120
2.7.1.21	Klebsiella_pneumoniae_subsp._pneumoniae_WGLW5	HMPREF1308_02344_thymidine_kinase	87.28	98.29	6e-112
2.7.1.21	Erysipelotrichaceae_bacterium_3_1_53	HMPREF0983_03549_thymidine_kinase	63.4	97.47	7e-92
2.7.1.21	Lachnospiraceae_bacterium_7_1_58FAA	HMPREF0995_02621_hypothetical_protein	49.22	98.41	4e-62
2.7.1.21	Bacteroides_vulgatus_PC510	CUU_0571_thymidine_kinase	100	99.5	1e-146
2.7.1.21	Escherichia_coli_MS_124-1	HMPREF9347_03420_thymidine_kinase	99.51	99.51	2e-153
2.7.1.21	Lactobacillus_reuteri_DSM_20016_uid58471	gi|148543686|ref|YP_001271056.1|	74.87	97.38	3e-106
2.7.1.21	Escherichia_coli_MS_119-7	HMPREF9346_00809_thymidine_kinase	100	99.51	5e-154
2.7.1.21	Prevotella_oralis_HGA0225	HMPREF1475_00943_thymidine_kinase	77.84	97.97	1e-113
2.7.1.21	Marvinbryantia_formatexigens_DSM_14469	BRYFOR_05761_thymidine_kinase	49.22	93.43	3e-60
2.7.1.21	Bacteroides_fragilis_YCH46_uid58195	gi|53711949|ref|YP_097941.1|	100	99.5	1e-134
2.7.1.21	Turicibacter_sp._HGF1	HMPREF9402_2782_thymidine_kinase	61.14	95.52	1e-90
2.7.1.21	Escherichia_coli_SE15	ECSF_1219_thymidine_kinase	100	99.51	6e-154
2.7.1.21	Bacteroides_sp._1_1_14	HMPREF9007_04903_thymidine_kinase	100	99.5	4e-147
2.7.1.21	Lachnospiraceae_bacterium_2_1_58FAA	HMPREF0991_01242_thymidine_kinase	47.76	96.84	4e-51
2.7.1.21	Escherichia_coli_SE11	ECSE_1288_thymidine_kinase	100	99.51	5e-154
2.7.1.21	Lactobacillus_reuteri_MM2-3	HMPREF0535_0302_thymidine_kinase	74.87	97.38	3e-106
2.7.1.21	Lactobacillus_salivarius_ATCC_11741	gi|227890651|ref|ZP_04008456.1|	80.85	93.03	1e-115
2.7.1.21	Faecalibacterium_prausnitzii_SL3_3	FPR_01990_thymidine_kinase	46.77	91.04	2e-53
2.7.1.21	Lactobacillus_plantarum_subsp._plantarum_ATCC_14917_=_JCM_1149_=	HMPREF0531_10122_thymidine_kinase	99.48	97.95	2e-144
2.7.1.21	Enterococcus_sp._7L76	ENT_17330_thymidine_kinase	99.48	99.48	2e-145
2.7.1.21	Providencia_rustigianii_DSM_4541	PROVRUST_04808_thymidine_kinase	75.77	86.55	3e-112
2.7.1.21	Intestinibacter_bartlettii_DSM_16795	CLOBAR_01873_thymidine_kinase	44.9	97.45	2e-53
2.7.1.21	Enterobacter_cloacae_subsp._cloacae_NCTC_9394	ENC_07960_thymidine_kinase	86.21	85.23	5e-131
2.7.1.21	Lactobacillus_paracasei_subsp._paracasei_8700:2	tr|C5F354|C5F354_LACPA	79.26	95.41	1e-115
2.7.1.21	Paraprevotella_clara_YIT_11840	HMPREF9441_02632_thymidine_kinase	76.6	81.66	7e-107
2.7.1.21	Ruminococcus_torques_L2-14	RTO_27280_thymidine_kinase	46.43	91.39	4e-54
2.7.1.21	Prevotella_salivae_DSM_15606	HMPREF9420_1093_thymidine_kinase	75.25	94.26	4e-101
2.7.1.21	Erysipelotrichaceae_bacterium_21_3	HMPREF0982_02572_hypothetical_protein	63.02	96.95	9e-91
2.7.1.21	Blautia_hansenii_DSM_20583	BLAHAN_06610_thymidine_kinase	45.64	88.12	2e-53
2.7.1.21	Lactobacillus_reuteri_SD2112	HMPREF0538_21671_thymidine_kinase	74.87	97.38	3e-106
2.7.1.21	Escherichiacoli_O127:H6_str._E2348-69	tr|B7UQD0|B7UQD0_ECO27	100	99.51	6e-154
2.7.1.21	Bacteroides_sp._D22	HMPREF0106_04785_thymidine_kinase	96.48	99.5	2e-142
2.7.1.21	Bacteroides_xylanisolvens_SD_CC_1b	CW3_3945_thymidine_kinase	96.48	99.5	2e-142
2.7.1.21	Propionibacterium_sp._HGH0353	HMPREF1485_02206_thymidine_kinase	93.9	99.53	3e-137
2.7.1.21	Bacteroides_eggerthii_1_2_48FAA	HMPREF1016_01366_thymidine_kinase	90.86	97.03	6e-134
2.7.1.21	Bacteroides_xylanisolvens_SD_CC_2a	CW1_0777_thymidine_kinase	96.48	99.5	2e-142
2.7.1.21	Weissella_paramesenteroides_ATCC_33313	HMPREF0877_0108_thymidine_kinase	58.16	98.9	7e-75
2.7.1.21	Weissella_paramesenteroides_ATCC_33313	HMPREF0877_0509_thymidine_kinase	65.48	93.5	8e-94
2.7.1.21	Erysipelotrichaceae_bacterium_5_2_54FAA	HMPREF0863_00039_hypothetical_protein	62.89	96.02	3e-91
2.7.1.21	Bacteroides_salyersiae_WAL_10018_=_DSM_18765_=_JCM_12988	HMPREF1532_01190_thymidine_kinase	92.93	98.99	1e-137
2.7.1.21	Listeria_grayi_DSM_20601	HMPREF0556_11300_thymidine_kinase	90	98.95	3e-129
2.7.1.21	Klebsiella_sp._4_1_44FAA	HMPREF1024_00516_thymidine_kinase	87.28	98.29	6e-112
2.7.1.21	Lactobacillus_ultunensis_DSM_16047	HMPREF0548_0204_thymidine_kinase	94.47	99.5	4e-143
2.7.1.21	Lactobacillus_amylolyticus_DSM_11664	HMPREF0493_0621_thymidine_kinase	82.41	99	3e-127
2.7.1.21	Bacteroides_sp._4_3_47FAA	BSFG_02579_thymidine_kinase	100	99.43	1e-127
2.7.1.21	Escherichia_coli_APEC_O1_uid58623	gi|117623453|ref|YP_852366.1|	100	99.51	6e-154
2.7.1.21	Erysipelatoclostridium_ramosum_DSM_1402	CLORAM_00369_thymidine_kinase	61.98	97.45	3e-88
2.7.1.21	Leuconostoc_mesenteroides_subsp._cremoris_ATCC_19254	HMPREF0555_0137_thymidine_kinase	62.44	80.77	6e-84
2.7.1.21	Parabacteroides_sp._20_3	HMPREF9008_00994_thymidine_kinase	80.1	96.94	7e-103
2.7.1.21	Lactobacillus_fermentum_IFO_3956	LAF_0426_thymidine_kinase	72.73	94.9	1e-103
2.7.1.21	Proteus_penneri_ATCC_35198	PROPEN_00108_thymidine_kinase	75.66	94.95	3e-107

[truncated: 6 more sheets: DrugBug_digoxin, DrugBug_hydrocortisone, DrugBug_mycophenolate-g, DrugBug_regorafenib-g, DrugBug_SN38g, DrugBug_sorivudine]
